# Supplementary material
Source: Research Square preprint supplement (doi:10.21203/rs.3.rs-9927529/v1)
Supplement: Supplementary file 1 [file 22e8e4fc7e427b12f07fc090.xlsx]

## Sheet: Sheet1
Table S10. Bifidobacterium longum assemblies annotation (non-hypothetical genes) from same organ donor (OD1).
Strains	Annotation	assembly_gene_start	assembly_gene_end	assembly_gene_strand	projected_reference_start	projected_reference_end
OD1, Mucosal, Duodenum	aminotransferase class I/II-fold pyridoxal phosphate-dependent enzyme	80012	81610	-	21635.5	23233.5
	aspartate aminotransferase family protein	82019	83344	+	23602.5	24927.5
	tyrosine-type recombinase/integrase	32533	33363	-	301136	301966
	HK97 family phage prohead protease	22841	24427	+	307111	308697
	phage portal protein	21723	22844	+	308264	309385
	HNH endonuclease signature motif containing protein	19025	19762	+	310428	311164
	helix-turn-helix transcriptional regulator	15844	16041	+	312900	313400
	ATP-binding protein	4552	5895	-	386590	387934
	type II toxin-antitoxin system HipA family toxin	1430	2590	+	592110	593270
	DUF2961 domain-containing protein	7507	8646	+	620412	621551
	sugar O-acetyltransferase	5723	6394	-	711913	712584
	carbon-nitrogen hydrolase family protein	112962	113792	+	1080686	1081516
	alcohol dehydrogenase AdhP	125615	126562	-	1098125	1099072
	tail type measure protein	1796	2662	+	1245155	1246021
	MATE family efflux transporter	14610	15968	-	1257188	1258546
	helix-hairpin-helix domain-containing protein	5613	6086	-	1312374	1312874
	VOC family protein	23774	24163	+	1510884	1511384
	DUF4143 domain-containing protein	104588	105067	+	1591672	1592172
	glycoside hydrolase family 3 C-terminal domain-containing protein	5718	7241	-	1813426	1814949
	aldo/keto reductase	82554	83402	-	1893123	1893971
	extracellular solute-binding protein	154806	156122	-	1968087	1969403
	AraC family transcriptional regulator	214302	215192	-	2029801	2030691
	NAD(P)-dependent alcohol dehydrogenase	215387	216427	-	2030929	2031969
	RbtT/DalT/CsbX family MFS transporter	216508	217758	-	2032096	2033346
	VOC family protein	218081	218485	-	2033664	2034164
	RbtT/DalT/CsbX family MFS transporter	218666	220003	-	2034336	2035673
	zinc-dependent alcohol dehydrogenase family protein	220252	221256	-	2035975	2036979
	type I polyketide synthase	8867	18385	-	2098294	2107812
	glycosyltransferase family 2 protein	78578	79333	-	2205767	2206522
	carbohydrate ABC transporter permease	62988	63914	+	2217945	2218871
	sugar ABC transporter permease	62038	62991	+	2218672	2219625
	extracellular solute-binding protein	60583	61899	+	2219498	2220814
	family 43 glycosylhydrolase	59132	60166	+	2220898	2221932
	alpha/beta hydrolase	57923	58867	-	2221935	2222879
	LacI family DNA-binding transcriptional regulator	56752	57810	+	2222759	2223817
	family 43 glycosylhydrolase	54504	56636	+	2223576	2225708
	glycoside hydrolase family 43 protein	52793	54388	-	2225410	2227005
	glycoside hydrolase family 43 protein	50891	52636	-	2226780	2228525
	alpha-L-arabinofuranosidase C-terminal domain-containing protein	48076	50541	+	2228362	2230827
	BRO family protein	19887	20450	-	2252362	2252925
	glycoside hydrolase family 13 protein	6693	8363	-	2308790	2310460
	carbohydrate ABC transporter permease	8464	9288	-	2310081	2310905
	ABC transporter permease subunit	9291	10331	-	2310575	2311615
	extracellular solute-binding protein	10335	11660	-	2311196	2312521
	DUF2961 domain-containing protein	11907	13025	-	2312245	2313363
	extracellular solute-binding protein	13087	14415	-	2312967	2314295
	LacI family DNA-binding transcriptional regulator	15769	16788	+	2314748	2315767
	sulfite exporter TauE/SafE family protein	26634	27458	-	2321776	2322600
	SpaH/EbpB family LPXTG-anchored major pilin	10432	12060	-	2339209	2340837
	glycoside hydrolase family 3 protein	30076	33033	-	2364796	2367753
	serine/threonine-protein kinase	33413	35500	+	2368982	2371069
OD1, Mucosal, Ascending colon	ATP-binding protein				12034.5	13455.5
	aminotransferase class I/II-fold pyridoxal phosphate-dependent enzyme				21191.5	22789.5
	aspartate aminotransferase family protein				23272.1	24597.1
	FAD-dependent oxidoreductase				31817	33798.9
	pyridoxamine 5'-phosphate oxidase family protein				83727.8	84332.8
	glycosyltransferase family A protein				84552.7	85424.7
	HNH endonuclease				85620.4	86516.4
	DNA (cytosine-5-)-methyltransferase				86822.8	88093.8
	Sau3AI family type II restriction endonuclease				88131.8	89612.8
	helix-turn-helix transcriptional regulator				340890	341978
	ACR3 family arsenite efflux transporter				342061	343104
	thioredoxin family protein				343350	343850
	permease				343767	344780
	metalloregulator ArsR/SmtB family transcription factor				344691	345191
	ATP-binding protein				386756	388098
	DUF4012 domain-containing protein				462046	463611
	AAA family ATPase				699962	701341
	metalloregulator ArsR/SmtB family transcription factor				702231	702731
	phage antirepressor Ant				1212820	1213587
	helix-hairpin-helix domain-containing protein				1317595	1318095
	MFS transporter				1385066	1385935
	restriction endonuclease subunit S				1781931	1783034
	CRISPR-associated endonuclease Cas2				1869917	1870417
	type II CRISPR-associated endonuclease Cas1				1870346	1871251
	peptide chain release factor N(5)-glutamine methyltransferase				1881493	1882434
	aldo/keto reductase				1906347	1907195
	AraC family transcriptional regulator				2034056	2034946
	NAD(P)-dependent alcohol dehydrogenase				2035090	2036130
	RbtT/DalT/CsbX family MFS transporter				2036161	2037411
	VOC family protein				2037635	2038135
	RbtT/DalT/CsbX family MFS transporter				2038221	2039558
	zinc-dependent alcohol dehydrogenase family protein				2039744	2040748
	type I polyketide synthase				2098296	2107814
	BRO family protein				2244384	2244947
	glycoside hydrolase family 3 protein				2349678	2352635
	serine/threonine-protein kinase				2354021	2356108
	IS21-like element ISBlo1 family helper ATPase IstB				2384226	2384987
	IS21 family transposase				2385024	2386463
