# Supplementary material
Source: Research Square preprint supplement (doi:10.21203/rs.3.rs-9927529/v1)
Supplement: Supplementary file 2 [file 355f8e3ec9b5b817b3b17d41.xlsx]

## Sheet: Sheet1
Table S5. Relative abundance of enzymes per organ donor, microenvironment and segment.
EC number	Donor								Milieu		Tissue						Description	Involved Pathway
	OD1	OD2	OD3	OD4	OD5	OD7	OD8	OD9	Lumen	Mucosa	Duodenum	Jejunum	Ileum	AscendingColon	TransverseColon	DescendingColon
1.1.1.1	0.168095	0.234678	0.0141824	0.0979353	0.0810771	0.030519	0.043114	0.330399	0.459008	0.540992	0.16392	0.0502255	0.0886867	0.242918	0.178381	0.275869	alcohol dehydrogenase.	Glycolysis / Gluconeogenesis
																	#N/A	Fatty acid degradation
																	#N/A	Glycine, serine and threonine metabolism
																	#N/A	Tyrosine metabolism
																	#N/A	alpha-Linolenic acid metabolism
																	#N/A	Pyruvate metabolism
																	#N/A	Chloroalkane and chloroalkene degradation
																	#N/A	Naphthalene degradation
																	#N/A	Retinol metabolism
																	#N/A	Metabolism of xenobiotics by cytochrome P450
																	#N/A	Drug metabolism - cytochrome P450
																	#N/A	Metabolic pathways
																	#N/A	Biosynthesis of secondary metabolites
																	#N/A	Microbial metabolism in diverse environments
1.1.1.100	0.185264	0.159288	0.014789	0.0918909	0.0884604	0.0279698	0.0291351	0.403203	0.465763	0.534237	0.201878	0.0301532	0.0980604	0.27168	0.119252	0.278977	3-oxoacyl-[acyl-carrier-protein] reductase.	Fatty acid biosynthesis
																	#N/A	Biotin metabolism
																	#N/A	Metabolic pathways
1.11.1.15	0.228833	0.0849026	0.0234291	0.136183	0.0917563	0.0131729	0.0350065	0.386717	0.415381	0.584619	0.250274	0.0240849	0.12654	0.311966	0.0487853	0.23835		NA
1.1.1.133	0.220358	0.123832	0.0148594	0.153804	0.0722443	0.0293925	0.0466198	0.33889	0.418665	0.581335	0.221725	0.0211623	0.11273	0.312561	0.0959	0.235922	dTDP-4-dehydrorhamnose reductase.	Streptomycin biosynthesis
																	#N/A	Polyketide sugar unit biosynthesis
																	#N/A	O-Antigen nucleotide sugar biosynthesis
																	#N/A	Metabolic pathways
																	#N/A	Biosynthesis of secondary metabolites
1.1.1.205	0.258467	0.0950669	0.0166188	0.074969	0.0877694	0.0356185	0.0543295	0.37716	0.414074	0.585926	0.227053	0.0363565	0.139526	0.27757	0.0565943	0.2629	IMP dehydrogenase.	Purine metabolism
																	#N/A	Drug metabolism - other enzymes
																	#N/A	Metabolic pathways
																	#N/A	Biosynthesis of secondary metabolites
1.1.1.267	0.219687	0.202979	0.0103369	0.126989	0.06865	0.0235049	0.0404246	0.307428	0.490037	0.509963	0.209724	0.00915563	0.105596	0.290657	0.179025	0.205841	1-deoxy-D-xylulose-5-phosphate reductoisomerase.	Terpenoid backbone biosynthesis
																	#N/A	Metabolic pathways
																	#N/A	Biosynthesis of secondary metabolites
1.1.1.27	0.149293	0.0944541	0.0308265	0.17033	0.130659	0.0380571	0.0626133	0.323767	0.406861	0.593139	0.220952	0.0520557	0.103734	0.288863	0.055194	0.279201	L-lactate dehydrogenase.	Glycolysis / Gluconeogenesis
																	#N/A	Cysteine and methionine metabolism
																	#N/A	Pyruvate metabolism
																	#N/A	Propanoate metabolism
																	#N/A	Metabolic pathways
																	#N/A	Biosynthesis of secondary metabolites
																	#N/A	Microbial metabolism in diverse environments
1.1.1.290	0.233108	0.151745	0.0134209	0.0891206	0.0682045	0.0242791	0.0408353	0.379286	0.47798	0.52202	0.211736	0.0229216	0.120401	0.286705	0.127848	0.230388	4-phosphoerythronate dehydrogenase.	Vitamin B6 metabolism
																	#N/A	Metabolic pathways
1.1.1.3	0.191259	0.296229	0.0130665	0.101177	0.118884	0.0697942	0.102212	0.107379	0.525212	0.474788	0.0930391	0.0168617	0.112445	0.2662	0.27311	0.238344	homoserine dehydrogenase.	Glycine, serine and threonine metabolism
																	#N/A	Cysteine and methionine metabolism
																	#N/A	Lysine biosynthesis
																	#N/A	Metabolic pathways
																	#N/A	Biosynthesis of secondary metabolites
																	#N/A	Microbial metabolism in diverse environments
1.1.1.44	0.244772	0.104344	0.0143412	0.120519	0.0675023	0.0313833	0.0482684	0.368869	0.420062	0.579938	0.20892	0.0203203	0.129623	0.311729	0.0844177	0.24499	phosphogluconate dehydrogenase(NADP(+)-dependent,decarboxylating).	Pentose phosphate pathway
																	#N/A	Glutathione metabolism
																	#N/A	Metabolic pathways
																	#N/A	Biosynthesis of secondary metabolites
																	#N/A	Microbial metabolism in diverse environments
1.1.1.85	0.227497	0.109572	0.0354057	0.120718	0.0704805	0.0461943	0.0607022	0.32943	0.380463	0.619537	0.202532	0.0395859	0.122534	0.299048	0.0618497	0.274451	3-isopropylmalate dehydrogenase.	Valine, leucine and isoleucine biosynthesis
																	#N/A	C5-Branched dibasic acid metabolism
																	#N/A	Metabolic pathways
																	#N/A	Biosynthesis of secondary metabolites
1.1.1.86	0.217541	0.145031	0.0168484	0.13202	0.0900515	0.025311	0.049635	0.323563	0.43123	0.56877	0.188307	0.0215455	0.113131	0.305563	0.125292	0.24616	ketol-acid reductoisomerase(NADP(+)).	Valine, leucine and isoleucine biosynthesis
																	#N/A	Pantothenate and CoA biosynthesis
																	#N/A	Metabolic pathways
																	#N/A	Biosynthesis of secondary metabolites
1.1.1.94	0.118287	0.347376	0.0247299	0.10855	0.0740457	0.0377765	0.0534706	0.235765	0.513599	0.486401	0.103443	0.0558441	0.0667523	0.224683	0.292829	0.256449	glycerol-3-phosphate dehydrogenase[NAD(P)(+)].	Glycerophospholipid metabolism
																	#N/A	Biosynthesis of secondary metabolites
1.17.1.8	0.221915	0.150228	0.0154867	0.108449	0.0874616	0.0217614	0.045557	0.349141	0.47644	0.52356	0.22046	0.0181247	0.111478	0.293951	0.128593	0.227392	4-hydroxy-tetrahydrodipicolinate reductase.	Monobactam biosynthesis
																	#N/A	Lysine biosynthesis
																	#N/A	Metabolic pathways
																	#N/A	Biosynthesis of secondary metabolites
																	#N/A	Microbial metabolism in diverse environments
1.17.4.1	0.12835	0.334892	0.0181511	0.121165	0.0717759	0.0451322	0.0722465	0.208288	0.486359	0.513641	0.0932801	0.0632957	0.0745304	0.231644	0.273017	0.264233	ribonucleoside-diphosphate reductase.	Purine metabolism
																	#N/A	Pyrimidine metabolism
																	#N/A	Glutathione metabolism
																	#N/A	Drug metabolism - other enzymes
																	#N/A	Metabolic pathways
1.17.4.2	0.254698	0.180681	0.0126253	0.0721831	0.0645105	0.0264726	0.0412984	0.347531	0.470269	0.529731	0.244377	0.0273383	0.117715	0.241664	0.148829	0.220077	ribonucleoside-triphosphate reductase(thioredoxin).	Purine metabolism
																	#N/A	Pyrimidine metabolism
																	#N/A	Metabolic pathways
1.2.1.11	0.176685	0.170459	0.0182198	0.149893	0.104583	0.0311466	0.0572504	0.291763	0.430624	0.569376	0.142524	0.0249239	0.101548	0.313294	0.141661	0.276049	aspartate-semialdehyde dehydrogenase.	Glycine, serine and threonine metabolism
																	#N/A	Monobactam biosynthesis
																	#N/A	Cysteine and methionine metabolism
																	#N/A	Lysine biosynthesis
																	#N/A	Metabolic pathways
																	#N/A	Biosynthesis of secondary metabolites
																	#N/A	Microbial metabolism in diverse environments
1.3.1.98	0.203738	0.120986	0.0522321	0.129967	0.0970229	0.0296595	0.0640964	0.302298	0.403348	0.596652	0.175228	0.0183416	0.114318	0.30407	0.140181	0.247861	UDP-N-acetylmuramate dehydrogenase.	Amino sugar and nucleotide sugar metabolism
																	#N/A	Peptidoglycan biosynthesis
																	#N/A	Metabolic pathways
1.4.1.13	0.165078	0.171535	0.0145358	0.119982	0.0884406	0.0100211	0.0202098	0.410197	0.423788	0.576212	0.197134	0.0482306	0.0921665	0.267383	0.111576	0.28351	glutamate synthase(NADPH).	Alanine, aspartate and glutamate metabolism
																	#N/A	Nitrogen metabolism
																	#N/A	Metabolic pathways
																	#N/A	Biosynthesis of secondary metabolites
																	#N/A	Microbial metabolism in diverse environments
1.5.1.2	0.190911	0.140957	0.0149443	0.163161	0.091115	0.0264025	0.0479333	0.324576	0.441977	0.558023	0.165927	0.0177623	0.10736	0.347339	0.120516	0.241095	pyrroline-5-carboxylate reductase.	Arginine and proline metabolism
																	#N/A	Metabolic pathways
																	#N/A	Biosynthesis of secondary metabolites
1.6.5.11	0.155651	0.179616	0.0386541	0.0642119	0.0332115	0.022902	0.0465627	0.459191	0.309031	0.690969	0.186781	0.13443	0.0704089	0.165714	0.0410379	0.401628		NA
1.8.1.4	0.101618	0.29564	0.0274105	0.216285	0.0641104	0.0330437	0.061445	0.200448	0.416112	0.583888	0.0888659	0.0650385	0.0598777	0.310281	0.231829	0.244108	dihydrolipoyl dehydrogenase.	Glycolysis / Gluconeogenesis
																	#N/A	Citrate cycle (TCA cycle)
																	#N/A	Glycine, serine and threonine metabolism
																	#N/A	Valine, leucine and isoleucine degradation
																	#N/A	Lysine degradation
																	#N/A	Tryptophan metabolism
																	#N/A	Pyruvate metabolism
																	#N/A	Propanoate metabolism
																	#N/A	Lipoic acid metabolism
																	#N/A	Metabolic pathways
																	#N/A	Biosynthesis of secondary metabolites
																	#N/A	Microbial metabolism in diverse environments
1.8.1.9	0.237632	0.16472	0.0152807	0.0898546	0.0920754	0.0302272	0.0494431	0.320766	0.486898	0.513102	0.213508	0.0122008	0.120936	0.272289	0.146377	0.23469	thioredoxin-disulfide reductase.	Selenocompound metabolism
1.97.1.4	0.267482	0.0962141	0.015645	0.0917902	0.0730089	0.0330398	0.0530263	0.369794	0.440056	0.559944	0.212979	0.0290358	0.132788	0.320833	0.0691564	0.235208	[formate-C-acetyltransferase]-activating enzyme.	NA
2.1.1.177	0.193709	0.189735	0.019353	0.127783	0.118725	0.0290649	0.0572737	0.264356	0.444833	0.555167	0.183853	0.0220767	0.101626	0.276495	0.154631	0.261319	23S rRNA(pseudouridine(1915)-N(3))-methyltransferase.	NA
2.1.1.182	0.221641	0.151316	0.0137991	0.109523	0.0867047	0.0264058	0.0496402	0.34097	0.467325	0.532675	0.195817	0.0184241	0.119324	0.290271	0.134615	0.241549	16S rRNA(adenine(1518)-N(6)/adenine(1519)-N(6))-dimethyltransferase.	NA
2.1.1.198	0.231256	0.162377	0.0151765	0.0937047	0.083336	0.0273063	0.0503716	0.336472	0.466606	0.533394	0.202363	0.0186975	0.125043	0.269989	0.1479	0.236007	16S rRNA(cytidine(1402)-2'-O)-methyltransferase.	NA
2.1.1.228	0.198018	0.172709	0.0172082	0.134106	0.0824348	0.0288831	0.0496032	0.317037	0.45139	0.54861	0.182892	0.0255797	0.112893	0.29664	0.139162	0.242832	tRNA (guanine(37)-N(1))-methyltransferase.	NA
2.1.1.33	0.247785	0.126593	0.0170019	0.107786	0.0973785	0.0387002	0.0723348	0.292421	0.420336	0.579664	0.193033	0.0170884	0.134729	0.291998	0.104476	0.258675	tRNA (guanine(46)-N(7))-methyltransferase.	NA
2.1.1.37	0.323814	0.0689969	0.019266	0.0675505	0.0524732	0.0451219	0.0658557	0.356922	0.409693	0.590307	0.289409	0.0211904	0.140642	0.278164	0.0493562	0.221238	DNA (cytosine-5-)-methyltransferase.	Cysteine and methionine metabolism
																	#N/A	Metabolic pathways
2.1.1.43	0.266608	0.0464175	0.0700388	0.0909756	0.16367	0.0763598	0.0525942	0.233336	0.448773	0.551227	0.344917	0.0735564	0.104818	0.216453	0.12593	0.134325		NA
2.1.1.45	0.199098	0.160787	0.0176148	0.0946615	0.0722724	0.0329427	0.0721996	0.350424	0.504112	0.495888	0.168641	0.0213472	0.135789	0.282261	0.133486	0.258476	thymidylate synthase.	Pyrimidine metabolism
																	#N/A	One carbon pool by folate
																	#N/A	Metabolic pathways
2.1.1.63	0.224152	0.170342	0.0225028	0.0720961	0.102299	0.0388204	0.0588096	0.310978	0.492842	0.507158	0.17791	0.0239947	0.108608	0.276782	0.153248	0.259457	methylated-DNA--[protein]-cysteine S-methyltransferase.	NA
2.1.2.1	0.191233	0.234549	0.0178357	0.117092	0.0838488	0.0334171	0.0485058	0.273518	0.478441	0.521559	0.188697	0.0212889	0.0921802	0.247082	0.212205	0.238547	glycine hydroxymethyltransferase.	Glycine, serine and threonine metabolism
																	#N/A	Cyanoamino acid metabolism
																	#N/A	Glyoxylate and dicarboxylate metabolism
																	#N/A	One carbon pool by folate
																	#N/A	Methane metabolism
																	#N/A	Metabolic pathways
																	#N/A	Biosynthesis of secondary metabolites
																	#N/A	Microbial metabolism in diverse environments
2.1.2.3	0.193688	0.173014	0.0179932	0.137204	0.0742838	0.0314497	0.0457262	0.326641	0.460528	0.539472	0.139758	0.0282327	0.112667	0.329359	0.146169	0.243815	phosphoribosylaminoimidazolecarboxamide formyltransferase.	Purine metabolism
																	#N/A	One carbon pool by folate
																	#N/A	Metabolic pathways
																	#N/A	Biosynthesis of secondary metabolites
2.1.3.3	0.175707	0.343985	0.0113452	0.072589	0.0625473	0.0195463	0.0296568	0.284624	0.589325	0.410675	0.171396	0.0112351	0.0933648	0.213716	0.326641	0.183647	ornithine carbamoyltransferase.	Arginine biosynthesis
																	#N/A	Metabolic pathways
																	#N/A	Biosynthesis of secondary metabolites
2.2.1.2	0.156746	0.243607	0.0126006	0.0921744	0.108376	0.0257684	0.0431842	0.317542	0.468193	0.531807	0.16072	0.0482697	0.0859606	0.23153	0.188688	0.284832	transaldolase.	Pentose phosphate pathway
																	#N/A	Metabolic pathways
																	#N/A	Biosynthesis of secondary metabolites
																	#N/A	Microbial metabolism in diverse environments
2.2.1.6	0.222974	0.140673	0.0135971	0.106705	0.0499607	0.0201536	0.0293181	0.416618	0.420483	0.579517	0.223144	0.0523339	0.113709	0.281717	0.0871339	0.241962	acetolactate synthase.	Valine, leucine and isoleucine biosynthesis
																	#N/A	Butanoate metabolism
																	#N/A	C5-Branched dibasic acid metabolism
																	#N/A	Pantothenate and CoA biosynthesis
																	#N/A	Metabolic pathways
																	#N/A	Biosynthesis of secondary metabolites
2.2.1.7	0.208469	0.151677	0.0127758	0.189428	0.0621196	0.0148202	0.0266709	0.334039	0.424709	0.575291	0.20959	0.0146632	0.100677	0.341682	0.135471	0.197917	1-deoxy-D-xylulose-5-phosphate synthase.	Thiamine metabolism
																	#N/A	Terpenoid backbone biosynthesis
																	#N/A	Metabolic pathways
																	#N/A	Biosynthesis of secondary metabolites
2.3.1.179	0.190153	0.164788	0.0161414	0.1498	0.0612232	0.0112989	0.0279267	0.378669	0.442605	0.557395	0.206135	0.0253904	0.0997865	0.302324	0.13479	0.231574	beta-ketoacyl-[acyl-carrier-protein] synthaseII.	Fatty acid biosynthesis
																	#N/A	Biotin metabolism
																	#N/A	Metabolic pathways
2.3.1.234	0.20401	0.155356	0.0158086	0.136024	0.0781451	0.0316505	0.0506127	0.328393	0.45879	0.54121	0.166567	0.02321	0.118884	0.322679	0.132644	0.236016	N(6)-L-threonylcarbamoyladenine synthase.	NA
2.3.1.31	0.252466	0.134893	0.018049	0.110294	0.0955884	0.03673	0.0559894	0.295991	0.469837	0.530163	0.210795	0.00507325	0.127326	0.30407	0.121591	0.231145	homoserine O-acetyltransferase.	Cysteine and methionine metabolism
																	#N/A	Metabolic pathways
2.3.1.54	0.125759	0.153872	0.0189508	0.19998	0.0716931	0.0208325	0.0336065	0.375306	0.333569	0.666431	0.169501	0.0810232	0.0834907	0.296773	0.0727247	0.296487	formate C-acetyltransferase.	Pyruvate metabolism
																	#N/A	Propanoate metabolism
																	#N/A	Butanoate metabolism
																	#N/A	Metabolic pathways
																	#N/A	Microbial metabolism in diverse environments
2.3.1.8	0.225297	0.153474	0.0111154	0.0756119	0.0914763	0.0305525	0.0503578	0.362115	0.494999	0.505001	0.206196	0.0177917	0.11952	0.277606	0.120835	0.258052	phosphate acetyltransferase.	Taurine and hypotaurine metabolism
																	#N/A	Pyruvate metabolism
																	#N/A	Propanoate metabolism
																	#N/A	Methane metabolism
																	#N/A	Carbon fixation pathways in prokaryotes
																	#N/A	Metabolic pathways
																	#N/A	Microbial metabolism in diverse environments
2.3.3.13	0.269544	0.0893841	0.0196027	0.102987	0.0785031	0.0319462	0.0559046	0.352128	0.397702	0.602298	0.237774	0.0280056	0.138865	0.290066	0.0605225	0.244767	2-isopropylmalate synthase.	Valine, leucine and isoleucine biosynthesis
																	#N/A	Pyruvate metabolism
																	#N/A	Metabolic pathways
																	#N/A	Biosynthesis of secondary metabolites
2.4.1.1	0.256714	0.0904038	0.0151352	0.0831458	0.0680343	0.0227854	0.0377962	0.425985	0.415476	0.584524	0.263076	0.0391583	0.131105	0.268768	0.0426794	0.255214	glycogen phosphorylase.	Starch and sucrose metabolism
																	#N/A	Metabolic pathways
																	#N/A	Biosynthesis of secondary metabolites
2.4.1.18	0.28942	0.0656855	0.0141937	0.0627485	0.0802333	0.0267886	0.0447998	0.416131	0.440464	0.559536	0.265835	0.0177024	0.147487	0.277325	0.0451005	0.24655	1,4-alpha-glucan branchingenzyme.	Starch and sucrose metabolism
																	#N/A	Metabolic pathways
																	#N/A	Biosynthesis of secondary metabolites
2.4.2.1	0.168965	0.108119	0.0169981	0.287268	0.0529678	0.0146003	0.0284017	0.32268	0.369641	0.630359	0.18938	0.0237085	0.0871885	0.415791	0.0875731	0.19636	purine-nucleoside phosphorylase.	Purine metabolism
																	#N/A	Nicotinate and nicotinamide metabolism
																	#N/A	Metabolic pathways
																	#N/A	Biosynthesis of secondary metabolites
2.4.2.10	0.235287	0.159824	0.0142166	0.109545	0.0989298	0.0384974	0.059329	0.284372	0.45158	0.54842	0.195917	0.0139408	0.120134	0.292025	0.138434	0.239549	orotate phosphoribosyltransferase.	Pyrimidine metabolism
																	#N/A	Drug metabolism - other enzymes
																	#N/A	Metabolic pathways
2.4.2.14	0.201999	0.161861	0.014488	0.149639	0.0718648	0.0227756	0.040998	0.336375	0.445739	0.554261	0.198265	0.0238527	0.103689	0.310328	0.134283	0.229582	amidophosphoribosyltransferase.	Purine metabolism
																	#N/A	Alanine, aspartate and glutamate metabolism
																	#N/A	Metabolic pathways
																	#N/A	Biosynthesis of secondary metabolites
2.4.2.29	0.216113	0.10058	0.0181857	0.182433	0.077564	0.0275528	0.0497812	0.32779	0.415268	0.584732	0.196719	0.0160108	0.113266	0.364032	0.0827542	0.227218	tRNA-guanosine(34) pre Q1 transglycosylase.	NA
2.4.2.8	0.245822	0.128779	0.0178687	0.101744	0.0864488	0.0324024	0.0562654	0.330671	0.447761	0.552239	0.220971	0.01663	0.126928	0.289216	0.104186	0.242069	hypoxanthine phosphoribosyltransferase.	Purine metabolism
																	#N/A	Drug metabolism - other enzymes
																	#N/A	Metabolic pathways
																	#N/A	Biosynthesis of secondary metabolites
2.5.1.17	0.250867	0.168704	0.0240431	0.0987518	0.0940531	0.0131496	0.0236671	0.326764	0.332691	0.667309	0.311083	0.0575099	0.0954625	0.187112	0.0872562	0.261577	corrinoid adenosyltransferase.	Porphyrin metabolism
																	#N/A	Metabolic pathways
2.5.1.19	0.219971	0.149113	0.0173663	0.128061	0.0786993	0.0298306	0.0476374	0.329321	0.434588	0.565412	0.204597	0.0182519	0.111705	0.294881	0.131208	0.239357	3-phosphoshikimate 1-carboxyvinyltransferase.	Phenylalanine, tyrosine and tryptophan biosynthesis
																	#N/A	Metabolic pathways
																	#N/A	Biosynthesis of secondary metabolites
2.5.1.48	0.393874	0.12101	0.00533619	0.0115214	0.103465	0.0950335	0.153854	0.115906	0.407312	0.592688	0.0953114	0.0143405	0.163397	0.37642	0.0911937	0.259338	cystathionine gamma-synthase.	Cysteine and methionine metabolism
																	#N/A	Selenocompound metabolism
																	#N/A	Sulfur metabolism
																	#N/A	Metabolic pathways
																	#N/A	Biosynthesis of secondary metabolites
2.5.1.54	0.198812	0.0840716	0.0145002	0.154263	0.0892794	0.0247853	0.0385334	0.395755	0.397791	0.602209	0.196614	0.026086	0.109525	0.334866	0.0533743	0.279535	3-deoxy-7-phosphoheptulonate synthase.	Phenylalanine, tyrosine and tryptophan biosynthesis
																	#N/A	Metabolic pathways
																	#N/A	Biosynthesis of secondary metabolites
2.5.1.6	0.235239	0.131399	0.0149547	0.102479	0.0625683	0.0208904	0.0356031	0.396866	0.48062	0.51938	0.221204	0.0176362	0.116998	0.305516	0.115512	0.223134	methionine adenosyltransferase.	Cysteine and methionine metabolism
																	#N/A	Biosynthesis of various plant secondary metabolites
																	#N/A	Metabolic pathways
																	#N/A	Biosynthesis of secondary metabolites
2.5.1.7	0.231027	0.151858	0.0142557	0.127577	0.0640851	0.0198197	0.038959	0.352419	0.464699	0.535301	0.215498	0.0178283	0.117851	0.310153	0.131109	0.20756	UDP-N-acetylglucosamine 1-carboxyvinyltransferase.	Amino sugar and nucleotide sugar metabolism
																	#N/A	Peptidoglycan biosynthesis
																	#N/A	Metabolic pathways
2.5.1.75	0.207246	0.152008	0.0238506	0.120148	0.0967935	0.0331308	0.0558833	0.31094	0.451973	0.548027	0.196872	0.0219695	0.114596	0.289362	0.123514	0.253686	tRNA dimethylallyltransferase.	Zeatin biosynthesis
																	#N/A	Metabolic pathways
																	#N/A	Biosynthesis of secondary metabolites
2.6.1.16	0.196084	0.171512	0.0147242	0.113566	0.08079	0.026276	0.0416656	0.355382	0.483544	0.516456	0.178988	0.0266517	0.114763	0.299227	0.140015	0.240356	glutamine--fructose-6-phosphate transaminase(isomerizing).	Alanine, aspartate and glutamate metabolism
																	#N/A	Amino sugar and nucleotide sugar metabolism
																	#N/A	Metabolic pathways
2.6.1.52	0.225006	0.153064	0.0163127	0.119081	0.0816675	0.0359203	0.0493558	0.319593	0.436802	0.563198	0.196274	0.0228551	0.124288	0.28841	0.12613	0.242043	phosphoserine transaminase.	Glycine, serine and threonine metabolism
																	#N/A	Cysteine and methionine metabolism
																	#N/A	Methane metabolism
																	#N/A	Vitamin B6 metabolism
																	#N/A	Metabolic pathways
																	#N/A	Biosynthesis of secondary metabolites
																	#N/A	Microbial metabolism in diverse environments
2.7.1.11	0.254234	0.0870608	0.0162097	0.106679	0.0474017	0.0136963	0.0246662	0.450052	0.459147	0.540853	0.262457	0.0184049	0.126269	0.304138	0.0642915	0.224441	6-phosphofructokinase.	Glycolysis / Gluconeogenesis
																	#N/A	Pentose phosphate pathway
																	#N/A	Fructose and mannose metabolism
																	#N/A	Galactose metabolism
																	#N/A	Methane metabolism
																	#N/A	Metabolic pathways
																	#N/A	Biosynthesis of secondary metabolites
																	#N/A	Microbial metabolism in diverse environments
2.7.11.1	0.225546	0.155195	0.0179225	0.0956689	0.0812259	0.0253009	0.0436532	0.355488	0.442774	0.557226	0.211878	0.0268571	0.116551	0.270322	0.130946	0.243445	non-specific serine/threonineproteinkinase.	NA
2.7.1.148	0.156332	0.304024	0.012868	0.0728522	0.125475	0.0373913	0.0630415	0.228016	0.502803	0.497197	0.127035	0.0290012	0.0883615	0.208053	0.267974	0.279575	4-(cytidine 5'-diphospho)-2-C-methyl-D-erythritolkinase.	Terpenoid backbone biosynthesis
																	#N/A	Metabolic pathways
																	#N/A	Biosynthesis of secondary metabolites
2.7.1.15	0.251414	0.102539	0.0184839	0.0885938	0.0764876	0.0280671	0.0517183	0.382696	0.509294	0.490706	0.183789	0.0114805	0.143176	0.342427	0.0929379	0.22619	ribokinase.	Pentose phosphate pathway
																	#N/A	Metabolic pathways
2.7.1.180	0.231469	0.187536	0.015287	0.0983685	0.0830854	0.0302388	0.047121	0.306895	0.49158	0.50842	0.196337	0.0110013	0.118733	0.278066	0.175661	0.220203	FAD:protein FMNtransferase.	NA
2.7.1.23	0.258085	0.170212	0.0163508	0.0870454	0.0825798	0.04114	0.0588025	0.285784	0.448209	0.551791	0.218215	0.0210732	0.122655	0.260813	0.141046	0.236197	NAD(+) kinase.	Nicotinate and nicotinamide metabolism
																	#N/A	Metabolic pathways
2.7.1.26	0.233816	0.170587	0.0171403	0.0881705	0.0971021	0.0297545	0.0538022	0.309627	0.445879	0.554121	0.225811	0.0207298	0.123293	0.241376	0.1457	0.24309	riboflavin kinase.	Riboflavin metabolism
																	#N/A	Metabolic pathways
																	#N/A	Biosynthesis of secondary metabolites
2.7.1.33	0.185468	0.148161	0.0159897	0.128941	0.0746875	0.0275659	0.0424725	0.376716	0.435834	0.564166	0.175007	0.0270881	0.107536	0.292778	0.120028	0.277563	pantothenate kinase.	Pantothenate and CoA biosynthesis
																	#N/A	Metabolic pathways
2.7.13.3	0.119348	0.141083	0.0101873	0.243397	0.069296	0.0115659	0.0215962	0.383526	0.459649	0.540351	0.111612	0.00977016	0.0902622	0.408831	0.138178	0.241347	histidine kinase.	NA
2.7.1.40	0.240923	0.105281	0.0158128	0.0830126	0.0850904	0.0234407	0.0397233	0.406717	0.482275	0.517725	0.224327	0.0171053	0.130163	0.303638	0.089737	0.235029	pyruvate kinase.	Glycolysis / Gluconeogenesis
																	#N/A	Pyruvate metabolism
																	#N/A	Metabolic pathways
																	#N/A	Biosynthesis of secondary metabolites
																	#N/A	Microbial metabolism in diverse environments
2.7.1.69	0.286927	0.104569	0.0102679	0.0894757	0.0924731	0.051423	0.0526705	0.312194	0.426746	0.573254	0.239583	0.00315829	0.123713	0.287954	0.0998768	0.245715		NA
2.7.1.71	0.25262	0.132691	0.0208314	0.0826004	0.068778	0.0173474	0.0277929	0.397339	0.412731	0.587269	0.270965	0.0443211	0.121787	0.23544	0.086871	0.240616	shikimate kinase.	Phenylalanine, tyrosine and tryptophan biosynthesis
																	#N/A	Metabolic pathways
																	#N/A	Biosynthesis of secondary metabolites
2.7.2.1	0.191101	0.170072	0.0185609	0.130153	0.0873395	0.0258233	0.044364	0.332586	0.438688	0.561312	0.186458	0.0281941	0.106095	0.285319	0.134865	0.259069	acetate kinase.	Taurine and hypotaurine metabolism
																	#N/A	Pyruvate metabolism
																	#N/A	Propanoate metabolism
																	#N/A	Methane metabolism
																	#N/A	Carbon fixation pathways in prokaryotes
																	#N/A	Metabolic pathways
																	#N/A	Microbial metabolism in diverse environments
2.7.2.11	0.22591	0.131518	0.0178505	0.112179	0.0996628	0.0314451	0.0559683	0.325467	0.418565	0.581435	0.197498	0.0269928	0.122232	0.290286	0.104838	0.258153	glutamate 5-kinase.	Arginine and proline metabolism
																	#N/A	Carbapenem biosynthesis
																	#N/A	Metabolic pathways
																	#N/A	Biosynthesis of secondary metabolites
2.7.2.3	0.181474	0.162155	0.0187082	0.158994	0.0786316	0.0240266	0.0427061	0.333304	0.445596	0.554404	0.176988	0.0219824	0.104476	0.323374	0.132535	0.240644	phosphoglycerate kinase.	Glycolysis / Gluconeogenesis
																	#N/A	Carbon fixation in photosynthetic organisms
																	#N/A	Metabolic pathways
																	#N/A	Biosynthesis of secondary metabolites
																	#N/A	Microbial metabolism in diverse environments
2.7.2.4	0.223797	0.117326	0.0173159	0.119954	0.0842728	0.0333947	0.0504278	0.353511	0.441407	0.558593	0.177609	0.0242553	0.125878	0.328361	0.0908952	0.253001	aspartate kinase.	Glycine, serine and threonine metabolism
																	#N/A	Monobactam biosynthesis
																	#N/A	Cysteine and methionine metabolism
																	#N/A	Lysine biosynthesis
																	#N/A	Metabolic pathways
																	#N/A	Biosynthesis of secondary metabolites
																	#N/A	Microbial metabolism in diverse environments
2.7.3.9	0.215073	0.176512	0.0116151	0.122071	0.0720155	0.0308592	0.0472305	0.324624	0.424555	0.575445	0.182306	0.0397333	0.111215	0.293194	0.130821	0.242731	phosphoenolpyruvate--protein phosphotransferase.	NA
2.7.4.1	0.179607	0.410778	0.0105206	0.0461874	0.0605318	0.0197183	0.0366131	0.236043	0.620528	0.379472	0.164987	0.0180646	0.0915097	0.168242	0.39048	0.166717	ATP-polyphosphate phosphotransferase.	Oxidative phosphorylation
2.7.4.22	0.198573	0.157676	0.0158515	0.16463	0.0721571	0.0288958	0.0464542	0.315762	0.455443	0.544557	0.174223	0.018663	0.112248	0.338569	0.134967	0.221329	UMP kinase.	Pyrimidine metabolism
																	#N/A	Metabolic pathways
2.7.4.3	0.227846	0.147156	0.017342	0.116956	0.0775948	0.0292319	0.0484584	0.335415	0.473305	0.526695	0.210539	0.00879396	0.121785	0.298402	0.130052	0.230427	adenylate kinase.	Purine metabolism
																	#N/A	Thiamine metabolism
																	#N/A	Metabolic pathways
																	#N/A	Biosynthesis of secondary metabolites
2.7.4.8	0.249963	0.120031	0.0163802	0.144013	0.0809715	0.0247573	0.04678	0.317103	0.424154	0.575846	0.240733	0.0105381	0.117727	0.309433	0.10029	0.221279	guanylate kinase.	Purine metabolism
																	#N/A	Metabolic pathways
2.7.6.1	0.201686	0.138121	0.0115916	0.147735	0.0826018	0.0281214	0.0469498	0.343194	0.466564	0.533436	0.164397	0.0146763	0.113511	0.351394	0.117658	0.238364	ribose-phosphate diphosphokinase.	Pentose phosphate pathway
																	#N/A	Purine metabolism
																	#N/A	Metabolic pathways
																	#N/A	Biosynthesis of secondary metabolites
																	#N/A	Microbial metabolism in diverse environments
2.7.6.5	0.240134	0.208209	0.0110447	0.118594	0.0746882	0.0302457	0.0446125	0.272472	0.448187	0.551813	0.205714	0.0138115	0.111075	0.270016	0.186094	0.213289	GTP diphosphokinase.	Purine metabolism
																	#N/A	Metabolic pathways
2.7.7.2	0.264645	0.162633	0.0155595	0.0930256	0.0856173	0.0382986	0.0609016	0.279319	0.457173	0.542827	0.224554	0.0108258	0.127643	0.270929	0.140556	0.225492	FAD synthase.	Riboflavin metabolism
																	#N/A	Metabolic pathways
																	#N/A	Biosynthesis of secondary metabolites
2.7.7.24	0.191812	0.0836926	0.0195145	0.175828	0.114362	0.012239	0.0340067	0.368546	0.373041	0.626959	0.227152	0.0220485	0.113875	0.32054	0.0493691	0.267015	glucose-1-phosphate thymidylyltransferase.	Streptomycin biosynthesis
																	#N/A	Polyketide sugar unit biosynthesis
																	#N/A	Acarbose and validamycin biosynthesis
																	#N/A	O-Antigen nucleotide sugar biosynthesis
																	#N/A	Metabolic pathways
																	#N/A	Biosynthesis of secondary metabolites
2.7.7.27	0.289482	0.0685609	0.0112531	0.0682498	0.0705378	0.0220521	0.0359365	0.433928	0.446011	0.553989	0.297663	0.0171365	0.140788	0.268679	0.0459624	0.22977	glucose-1-phosphate adenylyltransferase.	Starch and sucrose metabolism
																	#N/A	Amino sugar and nucleotide sugar metabolism
																	#N/A	Metabolic pathways
																	#N/A	Biosynthesis of secondary metabolites
2.7.7.3	0.244549	0.125544	0.0170911	0.104051	0.100451	0.0410211	0.0574343	0.309859	0.435934	0.564066	0.19748	0.017353	0.124705	0.289819	0.115419	0.255224	pantetheine-phosphate adenylyltransferase.	Pantothenate and CoA biosynthesis
																	#N/A	Metabolic pathways
2.7.7.49	0.0471668	0.164158	0.322874	0.0727442	0.0361375	0.0412475	0.0464906	0.269181	0.355889	0.644111	0.203071	0.110265	0.21186	0.0909302	0.102788	0.281085	RNA-directed DNApolymerase.	NA
2.7.7.6	0.199161	0.15839	0.0166131	0.138195	0.0743659	0.0280297	0.0444655	0.34078	0.453315	0.546685	0.192663	0.0226861	0.108918	0.305076	0.132299	0.238357	DNA-directed RNApolymerase.	NA
2.7.7.60	0.264635	0.107185	0.0172378	0.0732482	0.0879422	0.0321432	0.0553039	0.362305	0.419826	0.580174	0.231974	0.031701	0.133498	0.268618	0.0688492	0.265361	2-C-methyl-D-erythritol 4-phosphatecytidylyltransferase.	Terpenoid backbone biosynthesis
																	#N/A	Metabolic pathways
																	#N/A	Biosynthesis of secondary metabolites
2.7.7.7	0.203702	0.176317	0.0179768	0.120373	0.0710982	0.0237083	0.0382298	0.348594	0.44001	0.55999	0.206973	0.0404111	0.103882	0.272289	0.134528	0.241917	DNA-directed DNApolymerase.	NA
2.7.7.72	0.252621	0.121272	0.0144571	0.0942487	0.0822677	0.0252813	0.0496289	0.360223	0.454631	0.545369	0.235419	0.00789636	0.126144	0.279419	0.110405	0.240716	CCA tRNAnucleotidyltransferase.	NA
2.7.7.75	0.290258	0.0754875	0.00797637	0.098342	0.0912891	0.00770609	0.0223364	0.406605	0.340445	0.659555	0.325088	0.02761	0.104214	0.207717	0.0414488	0.293922	molybdopterin adenylyltransferase.	Folate biosynthesis
																	#N/A	Metabolic pathways
2.7.7.8	0.216615	0.139862	0.0146423	0.123504	0.0695067	0.0221889	0.0437535	0.369928	0.449352	0.550648	0.202253	0.0230448	0.115873	0.307349	0.108909	0.242571	polyribonucleotide nucleotidyltransferase.	NA
2.7.8.13	0.247255	0.141936	0.0187339	0.0824095	0.085837	0.0276992	0.0500541	0.346075	0.464503	0.535497	0.213532	0.0229481	0.124514	0.276314	0.118286	0.244406	phospho-N-acetylmuramoyl-pentapeptide-transferase.	Peptidoglycan biosynthesis
																	#N/A	Metabolic pathways
2.8.1.13	0.230267	0.154318	0.0231787	0.122524	0.0672113	0.0122189	0.0299745	0.360308	0.475954	0.524046	0.235628	0.00852414	0.117472	0.286541	0.143089	0.208746	tRNA-uridine 2-sulfurtransferase.	NA
2.8.1.7	0.183974	0.19683	0.0156595	0.137578	0.06981	0.019083	0.0270404	0.350025	0.455443	0.544557	0.190815	0.0338109	0.0960239	0.28897	0.159567	0.230813	cysteine desulfurase.	Thiamine metabolism
																	#N/A	Metabolic pathways
2.8.4.3	0.273245	0.0932058	0.0187717	0.0788115	0.101343	0.0398947	0.063643	0.331086	0.433349	0.566651	0.235442	0.0150861	0.133677	0.272609	0.0782082	0.264978	tRNA-2-methylthio-N(6)-dimethylallyladenosine synthase.	NA
3.1.11.6	0.232138	0.161295	0.0193874	0.0877101	0.0915694	0.0265704	0.0467424	0.334587	0.446758	0.553242	0.211308	0.0361124	0.120389	0.257866	0.129124	0.2452	exodeoxyribonuclease VII.	NA
3.1.1.29	0.22258	0.160282	0.0200806	0.135576	0.102211	0.0357912	0.058199	0.26528	0.41113	0.58887	0.204434	0.0238022	0.106194	0.282109	0.135463	0.247998	aminoacyl-tRNA hydrolase.	NA
3.1.1.96	0.220312	0.14922	0.0193772	0.0952165	0.0859326	0.0322407	0.0571586	0.340542	0.483382	0.516618	0.190257	0.0159496	0.127622	0.298835	0.129086	0.238249	D-aminoacyl-tRNA deacylase.	NA
3.1.22.4	0.214716	0.18657	0.0237465	0.0710537	0.0635104	0.0398078	0.0529703	0.347626	0.389247	0.610753	0.18697	0.0656284	0.110044	0.223874	0.118716	0.294767		NA
3.1.26.3	0.210661	0.157334	0.0196054	0.127344	0.0996079	0.0371181	0.0591215	0.289208	0.44864	0.55136	0.172353	0.0167002	0.115675	0.303567	0.135197	0.256506	ribonuclease III.	NA
3.1.26.4	0.217175	0.17301	0.0165459	0.119464	0.0999421	0.0359276	0.0584014	0.279535	0.458096	0.541904	0.178487	0.0182584	0.114278	0.296792	0.154516	0.237668	ribonuclease H.	NA
3.1.26.5	0.263727	0.129583	0.0180318	0.0845878	0.105679	0.0414444	0.0648862	0.29206	0.446198	0.553802	0.213217	0.0121735	0.139188	0.277296	0.109619	0.248507	ribonuclease P.	NA
3.1.3.16	0.256593	0.24515	0.00662297	0.0439854	0.0784257	0.031982	0.0351	0.302141	0.489051	0.510949	0.236868	0.0124015	0.104116	0.18936	0.224705	0.232549	protein-serine/threonine phosphatase.	NA
3.2.1.21	0.355493	0.07328	0.0115445	0.088703	0.0808868	0.023854	0.0394694	0.32677	0.355067	0.644933	0.367125	0.015443	0.142988	0.228164	0.0490953	0.197185	beta-glucosidase.	Cyanoamino acid metabolism
																	#N/A	Starch and sucrose metabolism
																	#N/A	Degradation of flavonoids
																	#N/A	Biosynthesis of various plant secondary metabolites
																	#N/A	Metabolic pathways
																	#N/A	Biosynthesis of secondary metabolites
3.2.1.22	0.295802	0.105546	0.0178302	0.115527	0.0675513	0.0152734	0.0382801	0.34419	0.438423	0.561577	0.301551	0.0137564	0.128726	0.272059	0.0920929	0.191814	alpha-galactosidase.	Galactose metabolism
																	#N/A	Glycerolipid metabolism
																	#N/A	Sphingolipid metabolism
																	#N/A	Glycosphingolipid biosynthesis - globo and isoglobo series
																	#N/A	Metabolic pathways
3.2.1.23	0.325687	0.0994491	0.0210007	0.0684244	0.0727088	0.0389476	0.0602507	0.313532	0.398075	0.601925	0.286623	0.0286492	0.142804	0.249354	0.0613777	0.231191	beta-galactosidase.	Galactose metabolism
																	#N/A	Other glycan degradation
																	#N/A	Glycosaminoglycan degradation
																	#N/A	Sphingolipid metabolism
																	#N/A	Glycosphingolipid biosynthesis - ganglio series
																	#N/A	Metabolic pathways
3.2.1.55	0.370917	0.0536269	0.0127796	0.0264015	0.125141	0.0546921	0.0907267	0.265715	0.405568	0.594432	0.236969	0.000753187	0.168998	0.298846	0.0295618	0.264871	non-reducing endalpha-L-arabinofuranosidase.	Amino sugar and nucleotide sugar metabolism
																	#N/A	Metabolic pathways
3.2.1.86	0.0803974	0.193811	0.0206819	0.203989	0.0960811	0.0162368	0.0177592	0.371044	0.421006	0.578994	0.149654	0.0658638	0.0715731	0.296774	0.132855	0.28328	6-phospho-beta-glucosidase.	Glycolysis / Gluconeogenesis
																	#N/A	Starch and sucrose metabolism
3.2.2.27	0.222232	0.159742	0.0196175	0.129748	0.0936644	0.031477	0.0525141	0.291004	0.454981	0.545019	0.181105	0.0213369	0.110228	0.315725	0.144107	0.227497	uracil-DNA glycosylase.	NA
3.2.2.9	0.223742	0.159505	0.0161783	0.130909	0.0916265	0.0299563	0.0531349	0.294948	0.419711	0.580289	0.214706	0.0193744	0.111	0.27061	0.134965	0.249346	adenosylhomocysteine nucleosidase.	Cysteine and methionine metabolism
																	#N/A	Metabolic pathways
3.4.11.18	0.232244	0.139492	0.0173868	0.120203	0.0784457	0.025921	0.0392242	0.347083	0.450313	0.549687	0.223521	0.0139854	0.118645	0.291284	0.117071	0.235493	methionyl aminopeptidase.	NA
3.4.16.4	0.265445	0.135767	0.0134938	0.0745372	0.0527925	0.0193421	0.0241545	0.414468	0.424972	0.575028	0.268011	0.038718	0.117055	0.24788	0.0937188	0.234617	serine-type D-Ala-D-Alacarboxypeptidase.	Peptidoglycan biosynthesis
3.4.21.53	0.277278	0.093464	0.0149099	0.059975	0.0805016	0.032566	0.0522467	0.389059	0.421227	0.578773	0.252085	0.0293347	0.133279	0.262584	0.0592148	0.263502	endopeptidase La.	NA
3.4.21.88	0.290391	0.133144	0.0106891	0.0621022	0.0953441	0.0437857	0.0701617	0.294382	0.416484	0.583516	0.234433	0.029334	0.132515	0.262148	0.0903601	0.251209	repressor LexA.	NA
3.4.21.89	0.240945	0.108286	0.0157804	0.119925	0.0931785	0.0323726	0.0517332	0.337779	0.456424	0.543576	0.2147	0.0116748	0.126154	0.312182	0.0978969	0.237393	signal peptidaseI.	NA
3.4.21.92	0.288233	0.100625	0.0156621	0.0910225	0.0896678	0.0457052	0.0723376	0.296747	0.437563	0.562437	0.202652	0.0124046	0.138312	0.317945	0.0857112	0.242975	endopeptidase Clp.	NA
3.4.23.36	0.250773	0.148283	0.0173562	0.0763752	0.0959712	0.0378687	0.0576477	0.315725	0.471137	0.528863	0.218464	0.0196451	0.130831	0.260151	0.127468	0.243441	signal peptidaseII.	NA
3.5.1.2	0.206346	0.223923	0.0161797	0.0976731	0.0959617	0.029031	0.0511638	0.279722	0.454647	0.545353	0.185993	0.0315309	0.0959891	0.245035	0.190688	0.250763	glutaminase.	Arginine biosynthesis
																	#N/A	Alanine, aspartate and glutamate metabolism
																	#N/A	D-Amino acid metabolism
																	#N/A	Metabolic pathways
3.5.1.25	0.190877	0.143416	0.0153718	0.193012	0.0939425	0.0346099	0.0477398	0.281031	0.366296	0.633704	0.182689	0.0505437	0.0947854	0.33638	0.0881033	0.247499	N-acetylglucosamine-6-phosphate deacetylase.	Galactose metabolism
																	#N/A	Amino sugar and nucleotide sugar metabolism
																	#N/A	Metabolic pathways
3.5.1.28	0.231337	0.184662	0.0158262	0.0928469	0.0513761	0.0201747	0.0343753	0.369402	0.390547	0.609453	0.248407	0.0552232	0.0968079	0.216228	0.12655	0.256784	N-acetylmuramoyl-L-alanine amidase.	NA
3.5.1.88	0.221624	0.130515	0.0148712	0.117613	0.106761	0.0348377	0.0603308	0.313447	0.457909	0.542091	0.182212	0.00846318	0.124572	0.310532	0.115186	0.259035	peptide deformylase.	NA
3.5.2.3	0.178594	0.188976	0.0142139	0.149817	0.0636203	0.0131235	0.0260857	0.36557	0.49423	0.50577	0.187858	0.0142866	0.103762	0.307076	0.174509	0.212508	dihydroorotase.	Pyrimidine metabolism
																	#N/A	Metabolic pathways
3.5.4.10	0.192267	0.158764	0.0155975	0.15162	0.083781	0.0343922	0.0503756	0.313203	0.487977	0.512023	0.118897	0.0125043	0.116429	0.37191	0.14692	0.233339	IMP cyclohydrolase.	Purine metabolism
																	#N/A	Metabolic pathways
																	#N/A	Biosynthesis of secondary metabolites
3.5.4.16	0.213022	0.181801	0.0205527	0.110983	0.0924568	0.0327364	0.0516505	0.296798	0.46484	0.53516	0.180269	0.0256135	0.105754	0.283904	0.153816	0.250643	GTP cyclohydrolaseI.	Folate biosynthesis
																	#N/A	Metabolic pathways
3.5.4.33	0.23257	0.120374	0.0174753	0.146101	0.0835934	0.0307882	0.0518222	0.317275	0.429511	0.570489	0.189895	0.0155662	0.118305	0.336534	0.105032	0.234668	tRNA(adenine(34)) deaminase.	NA
3.5.4.9	0.191478	0.172552	0.016769	0.145361	0.0858561	0.0238152	0.0430561	0.321113	0.44564	0.55436	0.187253	0.0256656	0.0989241	0.304121	0.141846	0.24219	methenyltetrahydrofolate cyclohydrolase.	One carbon pool by folate
																	#N/A	Carbon fixation pathways in prokaryotes
																	#N/A	Metabolic pathways
																	#N/A	Microbial metabolism in diverse environments
3.5.99.6	0.227781	0.108176	0.0199692	0.120725	0.0717912	0.0341484	0.0479817	0.369427	0.441923	0.558077	0.249698	0.0255207	0.118768	0.297208	0.0766829	0.232122	glucosamine-6-phosphate deaminase.	Amino sugar and nucleotide sugar metabolism
																	#N/A	Metabolic pathways
3.6.1.1	0.197683	0.155077	0.0109794	0.0669329	0.0821571	0.0304931	0.0480767	0.408601	0.563623	0.436377	0.136048	0.01348	0.143685	0.32339	0.142436	0.240961	inorganic diphosphatase.	Oxidative phosphorylation
3.6.1.23	0.246695	0.142282	0.0213214	0.0983635	0.0792401	0.0269689	0.0490656	0.336063	0.418726	0.581274	0.238385	0.0325106	0.115166	0.26328	0.10508	0.245579	dUTP diphosphatase.	Pyrimidine metabolism
																	#N/A	Drug metabolism - other enzymes
																	#N/A	Metabolic pathways
3.6.1.27	0.204951	0.146862	0.0166336	0.165378	0.0781019	0.0204764	0.038258	0.329339	0.431032	0.568968	0.204011	0.0204638	0.11123	0.321714	0.122574	0.220007	undecaprenyl-diphosphate phosphatase.	Peptidoglycan biosynthesis
																	#N/A	Teichoic acid biosynthesis
3.6.1.31	0.193636	0.207436	0.0181983	0.116304	0.115852	0.0371879	0.0631887	0.248197	0.468712	0.531288	0.173679	0.02	0.107021	0.265206	0.193505	0.240589	phosphoribosyl-ATP diphosphatase.	Histidine metabolism
																	#N/A	Metabolic pathways
																	#N/A	Biosynthesis of secondary metabolites
3.6.1.66	0.239723	0.12451	0.0144045	0.121636	0.0940209	0.0284295	0.0508036	0.326473	0.453921	0.546079	0.214883	0.0128217	0.116776	0.312657	0.109766	0.233095	XTP/dITP diphosphatase.	Purine metabolism
																	#N/A	Drug metabolism - other enzymes
																	#N/A	Metabolic pathways
3.6.3.14	0.197419	0.129098	0.0166717	0.0787768	0.0485432	0.0137125	0.0251618	0.490617	0.471146	0.528854	0.175778	0.0673937	0.126033	0.303	0.0839836	0.243812		NA
3.6.3.17	0.218486	0.201215	0.0141872	0.0657957	0.0766328	0.0350897	0.0533149	0.335279	0.42215	0.57785	0.199337	0.0648646	0.109878	0.223297	0.131148	0.271474		NA
3.6.3.31	0.258404	0.0857991	0.0152101	0.0890096	0.0696035	0.0372295	0.0569926	0.387752	0.441787	0.558213	0.193627	0.0309216	0.141093	0.329806	0.0547444	0.249808		NA
3.6.4.12	0.216269	0.178357	0.0151284	0.110499	0.0773917	0.0260744	0.042973	0.333307	0.46724	0.53276	0.200488	0.026292	0.111227	0.280272	0.150935	0.230787	DNA helicase.	NA
3.6.4.13	0.113	0.284376	0.0183231	0.154483	0.0601632	0.0517034	0.0420701	0.27588	0.388267	0.611733	0.0875268	0.0834164	0.0530579	0.254397	0.212344	0.309259	RNA helicase.	NA
4.1.1.20	0.240729	0.190805	0.0161404	0.0546541	0.0932571	0.0328786	0.0538283	0.317707	0.468845	0.531155	0.223213	0.0218563	0.106274	0.218108	0.156236	0.274312	diaminopimelate decarboxylase.	Lysine biosynthesis
																	#N/A	D-Amino acid metabolism
																	#N/A	Metabolic pathways
																	#N/A	Biosynthesis of secondary metabolites
																	#N/A	Microbial metabolism in diverse environments
4.1.1.23	0.233128	0.139043	0.0143177	0.13311	0.0891518	0.030587	0.0556282	0.305035	0.428142	0.571858	0.199011	0.0170906	0.11846	0.309233	0.11835	0.237855	orotidine-5'-phosphate decarboxylase.	Pyrimidine metabolism
																	#N/A	Metabolic pathways
4.1.2.13	0.193918	0.113877	0.0113961	0.115058	0.0705454	0.0271202	0.0367648	0.431321	0.457945	0.542055	0.171475	0.0267111	0.116927	0.320474	0.0827686	0.281643	fructose-bisphosphate aldolase.	Glycolysis / Gluconeogenesis
																	#N/A	Pentose phosphate pathway
																	#N/A	Fructose and mannose metabolism
																	#N/A	Methane metabolism
																	#N/A	Carbon fixation in photosynthetic organisms
																	#N/A	Metabolic pathways
																	#N/A	Biosynthesis of secondary metabolites
																	#N/A	Microbial metabolism in diverse environments
4.1.99.12	0.174404	0.138098	0.0183131	0.186222	0.057004	0.021244	0.0691108	0.335604	0.423846	0.576154	0.187205	0.0520084	0.112334	0.320921	0.0836779	0.243854	3,4-dihydroxy-2-butanone-4-phosphate synthase.	Riboflavin metabolism
																	#N/A	Metabolic pathways
																	#N/A	Biosynthesis of secondary metabolites
4.2.1.10	0.255532	0.0794985	0.015801	0.108612	0.0834523	0.0361278	0.0580635	0.362914	0.418032	0.581968	0.237815	0.015888	0.145671	0.293608	0.0614795	0.245539	3-dehydroquinate dehydratase.	Phenylalanine, tyrosine and tryptophan biosynthesis
																	#N/A	Metabolic pathways
																	#N/A	Biosynthesis of secondary metabolites
4.2.1.11	0.235357	0.123851	0.014136	0.146291	0.0699664	0.0207857	0.0397088	0.349904	0.420149	0.579851	0.217344	0.0227884	0.112831	0.32167	0.09961	0.225756	phosphopyruvate hydratase.	Glycolysis / Gluconeogenesis
																	#N/A	Methane metabolism
																	#N/A	Metabolic pathways
																	#N/A	Biosynthesis of secondary metabolites
																	#N/A	Microbial metabolism in diverse environments
4.2.1.20	0.227453	0.0828666	0.0167623	0.148206	0.0563365	0.0220571	0.0381873	0.408131	0.445599	0.554401	0.205931	0.018784	0.122585	0.355315	0.0722235	0.225161	tryptophan synthase.	Glycine, serine and threonine metabolism
																	#N/A	Phenylalanine, tyrosine and tryptophan biosynthesis
																	#N/A	Metabolic pathways
																	#N/A	Biosynthesis of secondary metabolites
4.2.1.33	0.235356	0.138994	0.0181216	0.0861654	0.0604886	0.0256679	0.0367376	0.398469	0.384324	0.615676	0.221862	0.0760914	0.115356	0.26556	0.0631043	0.258026	3-isopropylmalate dehydratase.	Valine, leucine and isoleucine biosynthesis
																	#N/A	Metabolic pathways
																	#N/A	Biosynthesis of secondary metabolites
4.2.1.46	0.20952	0.0793912	0.0227589	0.222566	0.0847895	0.0287186	0.0454111	0.306845	0.328414	0.671586	0.197668	0.028519	0.109325	0.377756	0.042264	0.244469	dTDP-glucose 4,6-dehydratase.	Streptomycin biosynthesis
																	#N/A	Polyketide sugar unit biosynthesis
																	#N/A	Acarbose and validamycin biosynthesis
																	#N/A	O-Antigen nucleotide sugar biosynthesis
																	#N/A	Biosynthesis of vancomycin group antibiotics
																	#N/A	Metabolic pathways
																	#N/A	Biosynthesis of secondary metabolites
4.2.1.9	0.201163	0.132178	0.0183401	0.0992919	0.0701719	0.0257966	0.0471035	0.405955	0.461892	0.538108	0.195336	0.033026	0.117621	0.294868	0.0927451	0.266405	dihydroxy-acid dehydratase.	Valine, leucine and isoleucine biosynthesis
																	#N/A	Pantothenate and CoA biosynthesis
																	#N/A	Metabolic pathways
																	#N/A	Biosynthesis of secondary metabolites
4.2.3.3	0.261381	0.100809	0.0213172	0.0641683	0.068628	0.0191153	0.0356821	0.428898	0.444486	0.555514	0.305567	0.0246837	0.146542	0.207563	0.0828633	0.232781	methylglyoxal synthase.	Propanoate metabolism
																	#N/A	Metabolic pathways
																	#N/A	Microbial metabolism in diverse environments
4.2.3.4	0.219568	0.118518	0.0184839	0.12466	0.0791803	0.0319363	0.0522968	0.355357	0.429889	0.570111	0.199481	0.0292757	0.11929	0.307893	0.0859221	0.258139	3-dehydroquinate synthase.	Phenylalanine, tyrosine and tryptophan biosynthesis
																	#N/A	Metabolic pathways
																	#N/A	Microbial metabolism in diverse environments
4.2.3.5	0.220274	0.15715	0.0155616	0.12173	0.084285	0.0311675	0.0557838	0.314048	0.453719	0.546281	0.187933	0.0184974	0.115978	0.302114	0.139363	0.236114	chorismate synthase.	Phenylalanine, tyrosine and tryptophan biosynthesis
																	#N/A	Metabolic pathways
																	#N/A	Biosynthesis of secondary metabolites
4.2.99.18	0.214202	0.134532	0.0182817	0.141132	0.0876876	0.0239351	0.0478544	0.332375	0.431366	0.568634	0.211634	0.0248512	0.104076	0.304771	0.109387	0.245281	DNA-(apurinic orapyrimidinicsite)	NA
4.3.1.17	0.187319	0.182409	0.0110769	0.0899074	0.0680946	0.0240684	0.031915	0.40521	0.462407	0.537593	0.153887	0.052656	0.106843	0.295647	0.137622	0.253345	L-serine ammonia-lyase.	Glycine, serine and threonine metabolism
																	#N/A	Cysteine and methionine metabolism
																	#N/A	Metabolic pathways
																	#N/A	Biosynthesis of secondary metabolites
4.3.2.10	0.219204	0.193323	0.0126777	0.129644	0.0820273	0.025801	0.0473789	0.289944	0.447048	0.552952	0.190248	0.0350871	0.108666	0.297056	0.156854	0.212089	imidazole glycerol-phosphatesynthase.	Histidine metabolism
																	#N/A	Metabolic pathways
																	#N/A	Biosynthesis of secondary metabolites
4.3.3.6	0.29234	0.119877	0.00921955	0.0840267	0.130661	0.0397107	0.0622916	0.261873	0.382443	0.617557	0.247501	0.00683513	0.117958	0.254757	0.107664	0.265285	pyridoxal 5'-phosphatesynthase(glutamine	Vitamin B6 metabolism
																	#N/A	Metabolic pathways
4.3.3.7	0.197501	0.16639	0.0151673	0.10917	0.0950124	0.0272633	0.0503987	0.339099	0.482625	0.517375	0.20504	0.0167449	0.111591	0.274597	0.147192	0.244835	4-hydroxy-tetrahydrodipicolinate synthase.	Monobactam biosynthesis
																	#N/A	Lysine biosynthesis
																	#N/A	Metabolic pathways
																	#N/A	Biosynthesis of secondary metabolites
																	#N/A	Microbial metabolism in diverse environments
4.6.1.12	0.265142	0.0924036	0.0202595	0.0984166	0.0941707	0.032012	0.0568351	0.340761	0.424207	0.575793	0.231059	0.0162941	0.131477	0.302305	0.0675901	0.251275	2-C-methyl-D-erythritol 2,4-cyclodiphosphatesynthase.	Terpenoid backbone biosynthesis
																	#N/A	Metabolic pathways
																	#N/A	Biosynthesis of secondary metabolites
5.1.1.1	0.170688	0.23094	0.0159181	0.131734	0.0767443	0.0220671	0.0432915	0.308616	0.467175	0.532825	0.186374	0.0307661	0.0935888	0.252763	0.188219	0.24829	alanine racemase.	D-Amino acid metabolism
																	#N/A	Metabolic pathways
5.1.1.3	0.244297	0.142821	0.0141144	0.079389	0.0817574	0.0246656	0.0429056	0.37005	0.489951	0.510049	0.221696	0.0131822	0.117671	0.282272	0.129069	0.23611	glutamate racemase.	D-Amino acid metabolism
																	#N/A	Metabolic pathways
5.1.3.1	0.18263	0.169408	0.0139208	0.128776	0.0756757	0.0252071	0.0413263	0.363056	0.451989	0.548011	0.187505	0.0274842	0.111954	0.28656	0.130784	0.255712	ribulose-phosphate 3-epimerase.	Pentose phosphate pathway
																	#N/A	Pentose and glucuronate interconversions
																	#N/A	Carbon fixation in photosynthetic organisms
																	#N/A	Metabolic pathways
																	#N/A	Biosynthesis of secondary metabolites
																	#N/A	Microbial metabolism in diverse environments
5.1.3.3	0.221724	0.082781	0.0296745	0.182592	0.0723288	0.0271912	0.0480572	0.335652	0.391892	0.608108	0.204508	0.0231982	0.122948	0.358717	0.0595871	0.231041	aldose 1-epimerase.	Glycolysis / Gluconeogenesis
																	#N/A	Galactose metabolism
																	#N/A	Metabolic pathways
																	#N/A	Biosynthesis of secondary metabolites
																	#N/A	Microbial metabolism in diverse environments
5.1.3.4	0.212837	0.0856086	0.00947689	0.108935	0.0743864	0.031303	0.043954	0.433499	0.375492	0.624508	0.171514	0.0519142	0.113966	0.309345	0.0357893	0.317471	L-ribulose-5-phosphate 4-epimerase.	Pentose and glucuronate interconversions
																	#N/A	Ascorbate and aldarate metabolism
																	#N/A	Metabolic pathways
																	#N/A	Microbial metabolism in diverse environments
5.2.1.8	0.221139	0.132633	0.0218266	0.104345	0.0738947	0.0311454	0.0481862	0.36683	0.437133	0.562867	0.205054	0.0407473	0.119499	0.290823	0.0889839	0.254893	peptidylprolyl isomerase.	NA
5.3.1.1	0.179656	0.197851	0.0151666	0.123242	0.0789598	0.0196571	0.0389249	0.346543	0.500392	0.499608	0.185705	0.0166224	0.0986135	0.286162	0.172012	0.240886	triose-phosphate isomerase.	Glycolysis / Gluconeogenesis
																	#N/A	Fructose and mannose metabolism
																	#N/A	Inositol phosphate metabolism
																	#N/A	Carbon fixation in photosynthetic organisms
																	#N/A	Metabolic pathways
																	#N/A	Biosynthesis of secondary metabolites
																	#N/A	Microbial metabolism in diverse environments
5.3.1.6	0.167369	0.269907	0.0112153	0.11708	0.0871091	0.0282328	0.047002	0.272085	0.497659	0.502341	0.158005	0.0257164	0.0927464	0.239864	0.241999	0.241668	ribose-5-phosphate isomerase.	Pentose phosphate pathway
																	#N/A	Fructose and mannose metabolism
																	#N/A	Carbon fixation in photosynthetic organisms
																	#N/A	Metabolic pathways
																	#N/A	Biosynthesis of secondary metabolites
																	#N/A	Microbial metabolism in diverse environments
5.3.1.9	0.209865	0.165421	0.0155341	0.118687	0.0831301	0.0244731	0.0400545	0.342835	0.461464	0.538536	0.201069	0.0179051	0.108413	0.290634	0.136826	0.245152	glucose-6-phosphate isomerase.	Glycolysis / Gluconeogenesis
																	#N/A	Pentose phosphate pathway
																	#N/A	Starch and sucrose metabolism
																	#N/A	Amino sugar and nucleotide sugar metabolism
																	#N/A	Metabolic pathways
																	#N/A	Biosynthesis of secondary metabolites
																	#N/A	Microbial metabolism in diverse environments
5.4.2.10	0.222717	0.153032	0.0136134	0.11441	0.0763739	0.0210909	0.0398289	0.358934	0.471191	0.528809	0.20531	0.020974	0.124494	0.304886	0.122741	0.221594	phosphoglucosamine mutase.	Amino sugar and nucleotide sugar metabolism
																	#N/A	Metabolic pathways
5.4.99.12	0.234211	0.146003	0.0153826	0.0999007	0.0768693	0.0266668	0.0431898	0.357777	0.464946	0.535054	0.22212	0.0171429	0.121438	0.28092	0.123638	0.234741	tRNA pseudouridine(38-40)synthase.	NA
5.4.99.25	0.254179	0.161773	0.0167518	0.104876	0.0862077	0.0292287	0.0533095	0.293674	0.44479	0.55521	0.22929	0.0143852	0.123025	0.269223	0.141925	0.222153	tRNA pseudouridine(55)synthase.	NA
5.99.1.2	0.267452	0.124092	0.0211743	0.0817041	0.062037	0.0216414	0.0399291	0.38197	0.43281	0.56719	0.276763	0.0271149	0.119625	0.249311	0.0967594	0.230427		NA
5.99.1.3	0.217799	0.157334	0.0137598	0.115295	0.0760059	0.0253432	0.0439647	0.350499	0.470907	0.529093	0.207313	0.019097	0.118763	0.2907	0.131706	0.232422		NA
6.1.1.1	0.211638	0.1613	0.0205665	0.128597	0.0719951	0.0283156	0.0458393	0.331748	0.446468	0.553532	0.193959	0.0243759	0.109345	0.300503	0.132357	0.239459	tyrosine--tRNA ligase.	Aminoacyl-tRNA biosynthesis
6.1.1.10	0.237149	0.136842	0.0143459	0.137607	0.0709342	0.0274798	0.0418118	0.333831	0.442776	0.557224	0.225701	0.0119233	0.121029	0.304089	0.12127	0.215988	methionine--tRNA ligase.	Selenocompound metabolism
																	#N/A	Aminoacyl-tRNA biosynthesis
																	#N/A	Metabolic pathways
6.1.1.11	0.189527	0.187564	0.0153594	0.158604	0.0829048	0.0317855	0.0450497	0.289205	0.418902	0.581098	0.185056	0.0242102	0.101632	0.283243	0.149182	0.256676	serine--tRNA ligase.	Aminoacyl-tRNA biosynthesis
6.1.1.14	0.188188	0.166842	0.0172732	0.146383	0.0845064	0.0256521	0.041939	0.329215	0.432208	0.567792	0.183646	0.0270488	0.103489	0.296113	0.134756	0.254947	glycine--tRNA ligase.	Aminoacyl-tRNA biosynthesis
6.1.1.15	0.228976	0.140992	0.0150593	0.127361	0.0720865	0.0244655	0.041544	0.349515	0.442528	0.557472	0.226016	0.0194624	0.112841	0.294686	0.115705	0.231289	proline--tRNA ligase.	Aminoacyl-tRNA biosynthesis
6.1.1.16	0.216766	0.166923	0.0189218	0.116075	0.0852033	0.0325234	0.0557221	0.307865	0.4425	0.5575	0.194067	0.0309749	0.117231	0.281313	0.13581	0.240603	cysteine--tRNA ligase.	Aminoacyl-tRNA biosynthesis
6.1.1.17	0.221764	0.155117	0.0154383	0.125995	0.077078	0.032237	0.0495949	0.322775	0.451424	0.548576	0.205355	0.0178148	0.119674	0.295032	0.120737	0.241387	glutamate--tRNA ligase.	Porphyrin metabolism
																	#N/A	Aminoacyl-tRNA biosynthesis
																	#N/A	Metabolic pathways
																	#N/A	Biosynthesis of secondary metabolites
																	#N/A	Microbial metabolism in diverse environments
6.1.1.19	0.206084	0.166662	0.0147781	0.14362	0.079792	0.0293897	0.0469214	0.312753	0.444845	0.555155	0.193015	0.0227453	0.109559	0.302255	0.136165	0.236261	arginine--tRNA ligase.	Aminoacyl-tRNA biosynthesis
6.1.1.2	0.218354	0.170553	0.0188926	0.161081	0.0950837	0.0357505	0.0558527	0.244432	0.389196	0.610804	0.185766	0.0186746	0.11012	0.296692	0.14328	0.245466	tryptophan--tRNA ligase.	Aminoacyl-tRNA biosynthesis
6.1.1.20	0.188659	0.18595	0.0163537	0.154979	0.076568	0.0269076	0.0435622	0.307021	0.460424	0.539576	0.184127	0.0181503	0.104737	0.306297	0.161795	0.224893	phenylalanine--tRNA ligase.	Aminoacyl-tRNA biosynthesis
6.1.1.21	0.223761	0.154234	0.0198002	0.140407	0.0881055	0.0304982	0.0472562	0.295938	0.409345	0.590655	0.212428	0.0261123	0.109522	0.288753	0.12484	0.238345	histidine--tRNA ligase.	Aminoacyl-tRNA biosynthesis
6.1.1.3	0.205907	0.202026	0.0144672	0.13588	0.0633881	0.0266826	0.0402348	0.311414	0.472473	0.527527	0.199893	0.0217209	0.109824	0.287766	0.172635	0.208162	threonine--tRNA ligase.	Aminoacyl-tRNA biosynthesis
6.1.1.4	0.19375	0.176088	0.0170271	0.150307	0.0629741	0.024681	0.0415329	0.333639	0.465304	0.534696	0.193576	0.0175988	0.104709	0.308455	0.149972	0.225689	leucine--tRNA ligase.	Aminoacyl-tRNA biosynthesis
6.1.1.5	0.233107	0.154883	0.0157452	0.106862	0.0608483	0.0239061	0.0354445	0.369205	0.45331	0.54669	0.219899	0.0296823	0.117136	0.283832	0.122293	0.227157	isoleucine--tRNA ligase.	Aminoacyl-tRNA biosynthesis
6.1.1.6	0.214909	0.143069	0.0173779	0.130652	0.0686594	0.0282611	0.0396713	0.3574	0.436887	0.563113	0.216412	0.0368315	0.110934	0.299908	0.0999139	0.236	lysine--tRNA ligase.	Aminoacyl-tRNA biosynthesis
6.1.1.7	0.210424	0.18666	0.0173124	0.116168	0.0636191	0.021212	0.0346343	0.349971	0.437508	0.562492	0.226927	0.0387737	0.1029	0.254304	0.137027	0.240069	alanine--tRNA ligase.	Aminoacyl-tRNA biosynthesis
6.1.1.9	0.19608	0.158774	0.0152856	0.131465	0.0758454	0.0249971	0.0427448	0.354809	0.44445	0.55555	0.192026	0.0330824	0.108024	0.295114	0.120667	0.251088	valine--tRNA ligase.	Aminoacyl-tRNA biosynthesis
6.3.1.2	0.262582	0.148799	0.0113198	0.0829712	0.10032	0.0381391	0.056248	0.299622	0.421618	0.578382	0.24007	0.0141609	0.121252	0.242593	0.121526	0.260398	glutamine synthetase.	Arginine biosynthesis
																	#N/A	Alanine, aspartate and glutamate metabolism
																	#N/A	Glyoxylate and dicarboxylate metabolism
																	#N/A	Nitrogen metabolism
																	#N/A	Metabolic pathways
																	#N/A	Microbial metabolism in diverse environments
6.3.2.10	0.217094	0.159149	0.0151797	0.113209	0.079545	0.0264289	0.0451165	0.344278	0.452206	0.547794	0.202585	0.0233871	0.116616	0.282599	0.135787	0.239026	UDP-N-acetylmuramoyl-tripeptide--D-alanyl-D-alanine ligase.	Lysine biosynthesis
																	#N/A	Peptidoglycan biosynthesis
																	#N/A	Metabolic pathways
6.3.2.4	0.22543	0.134743	0.0188614	0.106633	0.080164	0.0281245	0.0464605	0.359584	0.470606	0.529394	0.191269	0.0200604	0.135429	0.285362	0.10977	0.258109	D-alanine--D-alanine ligase.	D-Amino acid metabolism
																	#N/A	Peptidoglycan biosynthesis
																	#N/A	Metabolic pathways
6.3.2.8	0.224429	0.142317	0.0161739	0.107822	0.0794123	0.0245667	0.0460066	0.359273	0.468803	0.531197	0.205051	0.0164083	0.122468	0.297313	0.119854	0.238905	UDP-N-acetylmuramate--L-alanine ligase.	Peptidoglycan biosynthesis
																	#N/A	Metabolic pathways
6.3.2.9	0.23057	0.166691	0.0173853	0.0896034	0.085913	0.0273701	0.0523449	0.330122	0.475764	0.524236	0.20384	0.0177026	0.124689	0.272952	0.145156	0.235661	UDP-N-acetylmuramoyl-L-alanine--D-glutamate ligase.	D-Amino acid metabolism
																	#N/A	Peptidoglycan biosynthesis
																	#N/A	Metabolic pathways
6.3.3.1	0.201391	0.165732	0.0138176	0.14422	0.0783143	0.0250869	0.0432625	0.328176	0.43642	0.56358	0.191938	0.0269325	0.104274	0.304224	0.135406	0.237225	phosphoribosylformylglycinamidine cyclo-ligase.	Purine metabolism
																	#N/A	Metabolic pathways
																	#N/A	Biosynthesis of secondary metabolites
6.3.3.2	0.227354	0.132365	0.0163779	0.123956	0.0965522	0.0384753	0.0595632	0.305357	0.430888	0.569112	0.184164	0.0169329	0.116498	0.31381	0.113143	0.255453	5-formyltetrahydrofolate cyclo-ligase.	One carbon pool by folate
																	#N/A	Metabolic pathways
6.3.4.13	0.197064	0.177254	0.0157814	0.154759	0.07836	0.0238302	0.0403367	0.312614	0.430452	0.569548	0.18961	0.0270142	0.100842	0.295477	0.147663	0.239394	phosphoribosylamine--glycine ligase.	Purine metabolism
																	#N/A	Metabolic pathways
																	#N/A	Biosynthesis of secondary metabolites
6.3.4.14	0.209545	0.14607	0.0157077	0.123127	0.0724311	0.0190085	0.0316592	0.382451	0.482355	0.517645	0.200505	0.0183068	0.102235	0.318395	0.12526	0.235299	biotin carboxylase.	NA
6.3.4.2	0.201121	0.173246	0.0166707	0.103443	0.0696935	0.024504	0.0417417	0.36958	0.493113	0.506887	0.203754	0.0172322	0.114466	0.273967	0.153404	0.237177	CTP synthase(glutaminehydrolyzing).	Pyrimidine metabolism
																	#N/A	Metabolic pathways
6.3.4.21	0.214216	0.191982	0.0108109	0.099303	0.083272	0.0276338	0.0444899	0.328293	0.505081	0.494919	0.17889	0.0116934	0.110442	0.296301	0.177626	0.225048	nicotinate phosphoribosyltransferase.	Nicotinate and nicotinamide metabolism
																	#N/A	Metabolic pathways
6.3.4.3	0.2322	0.139458	0.0118953	0.112081	0.0822128	0.0224005	0.0479253	0.351827	0.498319	0.501681	0.197878	0.0036987	0.126201	0.32776	0.130712	0.21375	formate--tetrahydrofolate ligase.	One carbon pool by folate
																	#N/A	Carbon fixation pathways in prokaryotes
																	#N/A	Metabolic pathways
																	#N/A	Microbial metabolism in diverse environments
6.3.4.4	0.203641	0.154613	0.0160076	0.133292	0.0751567	0.0319754	0.046189	0.339126	0.424968	0.575032	0.195641	0.0331971	0.112514	0.292355	0.113255	0.253037	adenylosuccinate synthase.	Purine metabolism
																	#N/A	Alanine, aspartate and glutamate metabolism
																	#N/A	Metabolic pathways
6.3.5.2	0.204946	0.142444	0.0183402	0.124948	0.0796925	0.0241332	0.0446899	0.360806	0.479484	0.520516	0.198162	0.0137982	0.107304	0.311138	0.129742	0.239855	GMP synthase(glutamine-hydrolyzing).	Purine metabolism
																	#N/A	Drug metabolism - other enzymes
																	#N/A	Metabolic pathways
6.3.5.3	0.106776	0.338416	0.012925	0.137888	0.0770673	0.0120827	0.0277355	0.28711	0.537695	0.462305	0.122535	0.0353293	0.0676138	0.250886	0.299419	0.224217	phosphoribosylformylglycinamidine synthase.	Purine metabolism
																	#N/A	Metabolic pathways
																	#N/A	Biosynthesis of secondary metabolites
6.3.5.5	0.184119	0.23979	0.0149172	0.0984882	0.0803008	0.0238863	0.040895	0.317603	0.529857	0.470143	0.171001	0.0155736	0.107271	0.263548	0.219083	0.223523	carbamoyl-phosphate synthase(glutamine-hydrolyzing).	Pyrimidine metabolism
																	#N/A	Alanine, aspartate and glutamate metabolism
																	#N/A	Metabolic pathways
6.3.5.7	0.226903	0.134466	0.0110225	0.133241	0.0846647	0.0259792	0.0442871	0.339437	0.466064	0.533936	0.181421	0.00171962	0.122794	0.340027	0.127792	0.226246	glutaminyl-tRNA synthase(glutamine-hydrolyzing).	Aminoacyl-tRNA biosynthesis
																	#N/A	Metabolic pathways
6.4.1.2	0.158338	0.204893	0.0145237	0.122874	0.0453617	0.0120262	0.0194801	0.422504	0.386825	0.613175	0.18408	0.111819	0.0787725	0.252617	0.0943308	0.278381	acetyl-CoA carboxylase.	Fatty acid biosynthesis
																	#N/A	Aflatoxin biosynthesis
																	#N/A	Pyruvate metabolism
																	#N/A	Propanoate metabolism
																	#N/A	Carbon fixation pathways in prokaryotes
																	#N/A	Metabolic pathways
																	#N/A	Biosynthesis of secondary metabolites
																	#N/A	Microbial metabolism in diverse environments
7.1.2.2	0.256344	0.116774	0.0105703	0.0869884	0.056397	0.0204675	0.0341894	0.41827	0.491049	0.508951	0.236869	0.00829165	0.133053	0.2985	0.109601	0.213685	H(+)-transporting two-sectorATPase.	Oxidative phosphorylation
																	#N/A	Photosynthesis
																	#N/A	Metabolic pathways
7.3.2.1	0.213247	0.183857	0.015944	0.137119	0.109871	0.027667	0.0499259	0.262368	0.457925	0.542075	0.191108	0.00447193	0.110366	0.301437	0.167198	0.225419	ABC-type phosphatetransporter.	NA
