# Supplementary material
Source: Research Square preprint supplement (doi:10.21203/rs.3.rs-9927529/v1)
Supplement: Supplementary file 3 [file 39fe3f6ae6ff8ded4fac13b8.xlsx]

## Sheet: Sheet1
Table S11. qPCR primers used in the study
Target	Primer set	Sequence (5’ to 3’)	Target Gene	Amplicon size
Universal 16S rRNA (V4)	F515	GTGCCAGCMGCCGCGGTAA	16S	~300–350 bp
	R806	GGACTACHVHHHTWTCTAAT
Internal transcribed spacer (ITS)	ITS3	GCATCGATGAAGAACGCAGC	ITS-II region	~330 bp
