# Supplementary material
Source: Research Square preprint supplement (doi:10.21203/rs.3.rs-9927529/v1)
Supplement: Supplementary file 4 [file 3bfbfe95cdfdf5afa67f9cdc.xlsx]

## Sheet: Sheet1
Table S1. Organ donor information.
Donor	Age (years)	Age group	Gender	BMI	Race	Cause of death	Date of death	Additional information
Organ Donor 1	10	Adolescent	Female	ND	Unknown	Anoxia, mechanism: cardiovascular, circumstances: natural causes (unofficial: asthma attack)	April 2017	39 minutes of CPR downtime
Organ Donor 2	23	Young adult	Male	22.7	Unknown	Gunshot wound	January 2018	No duodenum with tissue due to pancreas transplant, small intestine full of mucus.
Organ Donor 3	65	Middle-aged/older adult	Female	39.5	Unknown	Cerebrovascular/Stroke	March 2018	-
Organ Donor 4	12	Adolescent	Male	ND	White	Cerebrovascular/Stroke	April 2018	-
Organ Donor 5	45	Middle-aged/older adult	Male	52.5	White	Anoxia/Cardiovascular	July 2020	High Cholesterol, Fatty Liver, Morbid Obesity, Alcohol Abuse - Coronary Artery Disease, Former Smoker - Hypertension, Pre-diabetic.
Organ Donor 7	45	Middle-aged/older adult	Male	27.7	White	Stroke, subarachnoid hemorrhage due to suicide)	September 2020	Positive for meth but no IV drug use.
Organ Donor 8	62	Middle-aged/older adult	Female	29.8	White	Cardiac arrest	November 2020	Smoking history.
								No active or chronic infections.
Organ Donor 9	29	Young adult	Male	36.4	White	Drug overdose	February 2021	BD due to drug intoxication. 50mins CPR and 10min DT.
