# Supplementary material
Source: Research Square preprint supplement (doi:10.21203/rs.3.rs-9927529/v1)
Supplement: Supplementary file 5 [file 61e5c061c7f093f416e61d94.xlsx]

## Sheet: S7-1
Table S7-1. Correlation Cluster in Large Intestine
Species	Cluster Group	NCBI taxonomy ID
Homo sapiens	PHG1	9606
Toxoplasma gondii	PHG1	5811
Trypanosoma brucei	PHG1	5691
Saccharomyces cerevisiae	PHG2	4932
Pichia kudriavzevii	PHG2	4909
Yarrowia lipolytica	PHG2	4952
Botrytis cinerea	PHG2	40559
Fusarium poae	PHG2	36050
Fusarium graminearum	PHG2	5518
Fusarium venenatum	PHG2	56646
Fusarium pseudograminearum	PHG2	101028
Fusarium oxysporum	PHG2	5507
Fusarium verticillioides	PHG2	117187
Fusarium fujikuroi	PHG2	5127
Fusarium musae	PHG2	1042133
Purpureocillium takamizusanense	PHG2	2060973
Drechmeria coniospora	PHG2	98403
Ustilaginoidea virens	PHG2	1159556
Pochonia chlamydosporia	PHG2	280754
Colletotrichum higginsianum	PHG2	80884
Thermothelomyces thermophilus	PHG2	78579
Neurospora crassa	PHG2	5141
Pyricularia grisea	PHG2	148305
Aspergillus oryzae	PHG2	5062
Aspergillus luchuensis	PHG2	1069201
Talaromyces rugulosus	PHG2	121627
Zymoseptoria tritici	PHG2	1047171
Schizosaccharomyces pombe	PHG2	4896
Psilocybe cubensis	PHG2	181762
Puccinia striiformis	PHG2	27350
Sporisorium graminicola	PHG2	280036
Besnoitia besnoiti	PHG2	94643
Neospora caninum	PHG2	29176
Babesia bigemina	PHG2	5866
Plasmodium malariae	PHG2	5858
Plasmodium vivax	PHG2	5855
Plasmodium cynomolgi	PHG2	5827
Plasmodium knowlesi	PHG2	5850
Plasmodium coatneyi	PHG2	208452
Plasmodium yoelii	PHG2	5861
Thalassiosira pseudonana	PHG2	35128
Leishmania infantum	PHG2	5671
Leishmania donovani	PHG2	5661
Leishmania mexicana	PHG2	5665
Leishmania major	PHG2	5664
Leishmania braziliensis	PHG2	5660
Leishmania panamensis	PHG2	5679
Dictyostelium discoideum	PHG2	44689
Giardia intestinalis	PHG2	5741
Staphylococcus capitis	PHG2	29388
Bacillus dafuensis	PHG2	1742359
Bacillus mycoides	PHG2	1405
Amphibacillus xylanus	PHG2	1449
Lysinibacillus fusiformis	PHG2	28031
Clostridium botulinum	PHG2	1491
Nocardia gipuzkoensis	PHG2	2749991
Arthrobacter sp. KBS0702	PHG2	2578107
Streptomyces sp. GMY02	PHG2	1333528
Streptomyces sp. ICC1	PHG2	2099583
Prochlorococcus marinus	PHG2	1219
Legionella pneumophila	PHG2	446
Legionella israelensis	PHG2	454
Legionella antarctica	PHG2	2708020
Klebsiella quasipneumoniae	PHG2	1463165
Klebsiella pneumoniae	PHG2	573
Pseudomonas fluorescens	PHG2	294
Pseudomonas frederiksbergensis	PHG2	104087
Pseudomonas putida	PHG2	303
Methylomagnum ishizawai	PHG2	1760988
Polynucleobacter sp. MG-Unter2-18	PHG2	2081052
Kinneretia sp. DAIF2	PHG2	2714952
Fluviibacter phosphoraccumulans	PHG2	1751046
Granulibacter bethesdensis	PHG2	364410
Bradyrhizobium erythrophlei	PHG2	1437360
Flavobacterium johnsoniae	PHG2	986
Chryseobacterium sp. 3008163	PHG2	2478663
Bacteroides thetaiotaomicron	PHG2	818
Parabacteroides merdae	PHG2	46503
Treponema denticola	PHG2	158
Lactococcus lactis	PHG2	1358
Lactococcus cremoris	PHG2	1359
Lactococcus garvieae	PHG2	1363
Corynebacterium matruchotii	PHG2	43768
Bacteroides salyersiae	PHG2	291644
Butyricimonas virosa	PHG2	544645
Prevotella melaninogenica	PHG2	28132
Klebsiella variicola	PHG2	244366
Serratia marcescens	PHG2	615
Tannerella forsythia	PHG2	28112
Proteus mirabilis	PHG2	584
Sutterella wadsworthensis	PHG2	40545
Fusobacterium ulcerans	PHG2	861
CrAss-like virus sp.	PHG2	2831617
Tenacibaculum sp. SZ-18	PHG2	754423
Saccharolobus solfataricus	PHG2	2287
Xanthobacter autotrophicus	PHG2	280
crAssphage cr50_1	PHG2	2772059
Saccharomyces eubayanus	PHG3	1080349
Saccharomyces paradoxus	PHG3	27291
Naumovozyma castellii	PHG3	27288
Naumovozyma dairenensis	PHG3	27289
Kluyveromyces marxianus	PHG3	4911
Kluyveromyces lactis	PHG3	28985
Eremothecium cymbalariae	PHG3	45285
Tetrapisispora blattae	PHG3	1071379
Tetrapisispora phaffii	PHG3	113608
[Candida] glabrata	PHG3	5478
Zygosaccharomyces rouxii	PHG3	4956
Zygotorulaspora mrakii	PHG3	42260
Kazachstania africana	PHG3	432096
Candida orthopsilosis	PHG3	273371
Scheffersomyces stipitis	PHG3	4924
Sugiyamaella lignohabitans	PHG3	796027
Saccharomycodes ludwigii	PHG3	36035
Pyricularia pennisetigena	PHG3	1578925
Aspergillus puulaauensis	PHG3	1220207
Aspergillus chevalieri	PHG3	182096
Streptococcus pneumoniae	PHG3	1313
Enterococcus faecalis	PHG3	1351
Faecalitalea cylindroides	PHG3	39483
Parolsenella massiliensis	PHG3	1871022
Burkholderia pseudomallei	PHG3	28450
Torulaspora delbrueckii	PHG3	4950
Kazachstania naganishii	PHG3	588726
Debaryomyces hansenii	PHG3	4959
Amedibacterium intestinale	PHG3	2583452
Bifidobacterium pseudocatenulatum	PHG3	28026
Bifidobacterium bifidum	PHG3	1681
Bifidobacterium catenulatum	PHG3	1686
Streptococcus lutetiensis	PHG3	150055
Streptococcus infantarius	PHG3	102684
Enterococcus mundtii	PHG3	53346
Enterococcus cecorum	PHG3	44008
Bifidobacterium angulatum	PHG3	1683
Flintibacter sp. KGMB00164	PHG3	2610895
Candidatus Desulforudis audaxviator	PHG3	471827
Streptococcus sp. FDAARGOS_522	PHG3	2420310
Streptococcus sp. CNU 77-61	PHG3	2684658
Streptococcus constellatus	PHG3	76860
Streptococcus pyogenes	PHG3	1314
Streptococcus equi	PHG3	1336
Streptococcus dysgalactiae	PHG3	1334
Streptococcus equinus	PHG3	1335
Streptococcus porcinus	PHG3	1340
Streptococcus acidominimus	PHG3	1326
Streptococcus canis	PHG3	1329
Streptococcus pantholopis	PHG3	1811193
Streptococcus uberis	PHG3	1349
Streptococcus halotolerans	PHG3	1814128
Streptococcus ratti	PHG3	1341
Streptococcus respiraculi	PHG3	2021971
Streptococcus parauberis	PHG3	1348
Streptococcus iniae	PHG3	1346
Streptococcus gallolyticus	PHG3	315405
Streptococcus himalayensis	PHG3	1888195
Streptococcus marmotae	PHG3	1825069
Streptococcus chenjunshii	PHG3	2173853
Streptococcus ferus	PHG3	1345
Streptococcus merionis	PHG3	400065
Streptococcus parasuis	PHG3	1501662
Streptococcus troglodytae	PHG3	1111760
Streptococcus halichoeri	PHG3	254785
Streptococcus pasteurianus	PHG3	197614
Ligilactobacillus ruminis	PHG3	1623
Lactobacillus johnsonii	PHG3	33959
Limosilactobacillus mucosae	PHG3	97478
Limosilactobacillus frumenti	PHG3	104955
Enterococcus saigonensis	PHG3	1805431
Enterococcus wangshanyuanii	PHG3	2005703
Enterococcus raffinosus	PHG3	71452
Enterococcus gilvus	PHG3	160453
Enterococcus rotai	PHG3	118060
Enterococcus durans	PHG3	53345
Enterococcus hirae	PHG3	1354
Tetragenococcus halophilus	PHG3	51669
Parageobacillus thermoglucosidasius	PHG3	1426
Allobaculum mucolyticum	PHG3	2834459
Allobaculum sp. Allo2	PHG3	2853432
Erysipelothrix sp. HDW6C	PHG3	2714930
Intestinibaculum porci	PHG3	2487118
Faecalibaculum rodentium	PHG3	1702221
Coriobacterium glomerans	PHG3	33871
Olsenella timonensis	PHG3	1805478
Thermophilibacter immobilis	PHG3	2779519
Agromyces soli	PHG3	659012
Bifidobacterium pullorum	PHG3	78448
Bifidobacterium thermophilum	PHG3	33905
Amycolatopsis sp. Hca4	PHG3	2742131
Prevotella sp. Rep29	PHG3	2691580
Prevotella dentalis	PHG3	52227
Prevotella multiformis	PHG3	282402
Prevotella denticola	PHG3	28129
Shigella dysenteriae	PHG3	622
Massilia lutea	PHG3	321985
Achromobacter pestifer	PHG3	1353889
Eremothecium gossypii	PHG3	33169
Methanobrevibacter millerae	PHG3	230361
Lachancea thermotolerans	PHG3	381046
Methanobrevibacter smithii	PHG3	2173
Streptococcus sp. CNU G3	PHG3	2698804
Streptococcus sp. CNU G2	PHG3	2686210
Torulaspora globosa	PHG3	48254
Eremothecium sinecaudum	PHG3	45286
Candida tropicalis	PHG4	5482
Candida dubliniensis	PHG4	42374
Candida albicans	PHG4	5476
Cryptococcus neoformans	PHG4	5207
Staphylococcus aureus	PHG4	1280
Staphylococcus condimenti	PHG4	70255
Staphylococcus pseudintermedius	PHG4	283734
Bacillus cereus	PHG4	1396
Bacillus thuringiensis	PHG4	1428
Anoxybacillus kamchatkensis	PHG4	196180
Limosilactobacillus fermentum	PHG4	1613
Mogibacterium diversum	PHG4	114527
Erysipelotrichaceae bacterium 66202529	PHG4	2676062
Parvimonas micra	PHG4	33033
Lawsonella clevelandensis	PHG4	1528099
Bifidobacterium longum	PHG4	216816
Ralstonia solanacearum	PHG4	305
Ralstonia insidiosa	PHG4	190721
Ralstonia pickettii	PHG4	329
Sphingomonas melonis	PHG4	152682
Bacillus subtilis	PHG4	1423
Geobacillus sp. JS12	PHG4	1813182
Geobacillus zalihae	PHG4	213419
Geobacillus stearothermophilus	PHG4	1422
Anoxybacillus gonensis	PHG4	198467
Anoxybacillus flavithermus	PHG4	33934
Streptococcus intermedius	PHG4	1338
Limosilactobacillus oris	PHG4	1632
Lactiplantibacillus plantarum	PHG4	1590
Lacticaseibacillus rhamnosus	PHG4	47715
Granulicatella adiacens	PHG4	46124
Turicibacter sp. H121	PHG4	1712675
Bifidobacterium adolescentis	PHG4	1680
Streptomyces sp. ICC4	PHG4	2099584
Streptomyces armeniacus	PHG4	83291
Cutibacterium acnes	PHG4	1747
Prevotella copri	PHG4	165179
Bradyrhizobium sp. BTAi1	PHG4	288000
Sphingomonas sp. NIC1	PHG4	1961362
Staphylococcus saprophyticus	PHG4	29385
Geobacillus sp. Y412MC52	PHG4	550542
Parageobacillus caldoxylosilyticus	PHG4	81408
Listeria monocytogenes	PHG4	1639
Limosilactobacillus reuteri	PHG4	1598
Mycobacterium paragordonae	PHG4	1389713
Corynebacterium striatum	PHG4	43770
Ralstonia sp. 56D2	PHG4	2842456
Ralstonia mannitolilytica	PHG4	105219
Mogibacterium pumilum	PHG4	86332
Lactobacillus sp. 3B(2020)	PHG4	2695882
Lactobacillus acidophilus	PHG4	1579
Limosilactobacillus pontis	PHG4	35787
Limosilactobacillus gastricus	PHG4	227942
Bacillus anthracis	PHG4	1392
Bacillus velezensis	PHG4	492670
Bacillus amyloliquefaciens	PHG4	1390
Bacillus vallismortis	PHG4	72361
Bacillus atrophaeus	PHG4	1452
Bacillus licheniformis	PHG4	1402
Bacillus rugosus	PHG4	2715209
Geobacillus subterraneus	PHG4	129338
Geobacillus thermocatenulatus	PHG4	33938
Geobacillus genomosp. 3	PHG4	1921421
Anoxybacillus amylolyticus	PHG4	294699
Aeribacillus pallidus	PHG4	33936
Paenibacillus sp. RUD330	PHG4	2023772
Brevibacillus choshinensis	PHG4	54911
Staphylococcus haemolyticus	PHG4	1283
Staphylococcus hominis	PHG4	1290
Staphylococcus simiae	PHG4	308354
Staphylococcus roterodami	PHG4	2699836
Staphylococcus lugdunensis	PHG4	28035
Staphylococcus felis	PHG4	46127
Staphylococcus schweitzeri	PHG4	1654388
Gemella haemolysans	PHG4	1379
Listeria welshimeri	PHG4	1643
Listeria marthii	PHG4	529731
Listeria weihenstephanensis	PHG4	1006155
Listeria innocua	PHG4	1642
Veillonella nakazawae	PHG4	2682456
Veillonella sp. S12025-13	PHG4	2682455
Murdochiella vaginalis	PHG4	1852373
Helcococcus kunzii	PHG4	40091
Finegoldia magna	PHG4	1260
Peptoniphilus harei	PHG4	54005
Ezakiella coagulans	PHG4	46507
Ezakiella massiliensis	PHG4	1852374
Collinsella sp. zg1085	PHG4	2844380
Mobiluncus curtisii	PHG4	2051
Nanchangia anserum	PHG4	2692125
Microbacterium sp. Nx66	PHG4	2766784
Curtobacterium flaccumfaciens	PHG4	2035
Dermabacter jinjuensis	PHG4	1667168
Bifidobacterium scardovii	PHG4	158787
Bifidobacterium imperatoris	PHG4	2020965
Corynebacterium segmentosum	PHG4	43990
Corynebacterium accolens	PHG4	38284
Corynebacterium macginleyi	PHG4	38290
Corynebacterium tuberculostearicum	PHG4	38304
Corynebacterium singulare	PHG4	161899
Corynebacterium jeikeium	PHG4	38289
Corynebacterium glucuronolyticum	PHG4	39791
Corynebacterium kefirresidentii	PHG4	1979527
Corynebacterium aurimucosum	PHG4	169292
Corynebacterium minutissimum	PHG4	38301
Corynebacterium diphtheriae	PHG4	1717
Mycobacterium gordonae	PHG4	1778
Cutibacterium avidum	PHG4	33010
Thermus brockianus	PHG4	56956
Sphingomonas paucimobilis	PHG4	13689
Geobacillus sp. GHH01	PHG4	1233873
Geobacillus sp. C56-T3	PHG4	691437
Geobacillus sp. 46C-IIa	PHG4	1963025
Geobacillus thermoleovorans	PHG4	33941
Geobacillus kaustophilus	PHG4	1462
[Bacillus] caldolyticus	PHG4	1394
Staphylococcus pasteuri	PHG4	45972
Pediococcus claussenii	PHG4	187452
Microbacterium paraoxydans	PHG4	199592
Corynebacterium simulans	PHG4	146827
Thermus sp. NEB1569	PHG4	2918899
Methylobacterium radiotolerans	PHG4	31998
Acinetobacter junii	PHG4	40215
Limosilactobacillus vaginalis	PHG4	1633
Limosilactobacillus panis	PHG4	47493
Staphylococcus saccharolyticus	PHG4	33028
Listeria ivanovii	PHG4	1638
Vaginimicrobium propionicum	PHG4	1871034
Thermothielavioides terrestris	PHG5	2587410
Plasmodium sp. gorilla clade G2	PHG5	880535
Priestia aryabhattai	PHG5	412384
Clostridium sp. AWRP	PHG5	2212991
Escherichia coli	PHG5	562
Tepiditoga spiralis	PHG5	2108365
Klebsiella oxytoca	PHG5	571
Arachnia rubra	PHG5	1547448
Porphyromonas asaccharolytica	PHG5	28123
Citrobacter koseri	PHG5	545
Klebsiella michiganensis	PHG5	1134687
Klebsiella quasivariicola	PHG5	2026240
Parageobacillus toebii	PHG6	153151
Priestia megaterium	PHG6	1404
Streptococcus suis	PHG6	1307
Clostridium neonatale	PHG6	137838
Collinsella aerofaciens	PHG6	74426
Acinetobacter baumannii	PHG6	470
Clostridium perfringens	PHG6	1502
Clostridium pasteurianum	PHG6	1501
Clostridiaceae bacterium Marseille-Q4149	PHG6	2830659
Brevibacillus laterosporus	PHG6	1465
Brevibacillus brevis	PHG6	1393
Megasphaera massiliensis	PHG6	1232428
Bifidobacterium pseudolongum	PHG6	1694
Collinsella stercoris	PHG6	147206
Vibrio parahaemolyticus	PHG6	670
Paenibacillus polymyxa	PHG6	1406
Granulicatella elegans	PHG6	137732
Clostridium beijerinckii	PHG6	1520
Leptotrichia sp. oral taxon 212	PHG6	712357
Fusobacterium nucleatum	PHG6	851
Ruminiclostridium herbifermentans	PHG6	2488810
Clostridium septicum	PHG6	1504
Clostridium sporogenes	PHG6	1509
Peptacetobacter hiranonis	PHG6	89152
Christensenella minuta	PHG6	626937
Desulfitobacterium hafniense	PHG6	49338
Desulfosporosinus meridiei	PHG6	79209
Dehalobacter restrictus	PHG6	55583
Streptococcus sp. 116-D4	PHG6	2598453
Streptococcus sp. HSISS1	PHG6	1316410
Streptococcus infantis	PHG6	68892
Streptococcus pseudoporcinus	PHG6	361101
Streptococcus pluranimalium	PHG6	82348
Streptococcus urinalis	PHG6	149016
Streptococcus ruminantium	PHG6	1917441
Lactobacillus amylovorus	PHG6	1604
Lacticaseibacillus paracasei	PHG6	1597
Pediococcus pentosaceus	PHG6	1255
Loigolactobacillus coryniformis	PHG6	1610
Weizmannia coagulans	PHG6	1398
Tannockella kyphosi	PHG6	2899121
Bulleidia sp. zg-1006	PHG6	2806552
Turicibacter sp. TJ11	PHG6	2806443
Parolsenella catena	PHG6	2003188
Bifidobacterium lemurum	PHG6	1603886
Treponema phagedenis	PHG6	162
Staphylococcus gallinarum	PHG6	1293
Gemella morbillorum	PHG7	29391
Streptococcus thermophilus	PHG7	1308
Streptococcus sp. A12	PHG7	1759399
Streptococcus australis	PHG7	113107
Streptococcus ilei	PHG7	1156431
Streptococcus koreensis	PHG7	2382163
Lactococcus piscium	PHG7	1364
Latilactobacillus sakei	PHG7	1599
Leuconostoc carnosum	PHG7	1252
Lactobacillus helveticus	PHG7	1587
Pediococcus acidilactici	PHG7	1254
Abiotrophia defectiva	PHG7	46125
Blautia wexlerae	PHG7	418240
Blautia massiliensis	PHG7	1737424
Blautia sp. SC05B48	PHG7	2479767
Anaerostipes hadrus	PHG7	649756
Ruminococcus sp. SR1/5	PHG7	657323
Erysipelatoclostridium ramosum	PHG7	1547
Actinomyces graevenitzii	PHG7	55565
Actinomyces naeslundii	PHG7	1655
Actinomyces sp. oral taxon 414	PHG7	712122
Actinomyces pacaensis	PHG7	1852377
Actinomyces oris	PHG7	544580
Schaalia odontolytica	PHG7	1660
Schaalia cardiffensis	PHG7	181487
Pauljensenia hongkongensis	PHG7	178339
Arachnia propionica	PHG7	1750
Lancefieldella parvula	PHG7	1382
Enterobacter asburiae	PHG7	61645
Cedecea neteri	PHG7	158822
Salmonella enterica	PHG7	28901
Lelliottia amnigena	PHG7	61646
uncultured human fecal virus	PHG7	239364
Streptococcus sanguinis	PHG7	1305
Actinomyces sp. oral taxon 171	PHG7	706438
Actinomyces sp. 432	PHG7	2057798
Actinomyces viscosus	PHG7	1656
Olsenella sp. oral taxon 807	PHG7	712411
Escherichia albertii	PHG7	208962
Escherichia fergusonii	PHG7	564
Escherichia marmotae	PHG7	1499973
Enterobacter hormaechei	PHG7	158836
Cronobacter sakazakii	PHG7	28141
Actinomyces gaoshouyii	PHG7	1960083
Clostridium intestinale	PHG7	36845
Sarcina sp. JB2	PHG7	2726954
Fenollaria massiliensis	PHG7	938288
Filifactor alocis	PHG7	143361
Streptococcus sp. oral taxon 061	PHG7	712623
Streptococcus sp. oral taxon 431	PHG7	712633
Streptococcus sp. NSJ-72	PHG7	2763068
Streptococcus sp. NPS 308	PHG7	1902136
Streptococcus sp. 1643	PHG7	2576376
Streptococcus cristatus	PHG7	45634
Streptococcus rubneri	PHG7	1234680
Streptococcus gwangjuense	PHG7	1433513
Leuconostoc mesenteroides	PHG7	1245
Leuconostoc pseudomesenteroides	PHG7	33968
Leuconostoc citreum	PHG7	33964
Leuconostoc lactis	PHG7	1246
Ligilactobacillus murinus	PHG7	1622
Weissella confusa	PHG7	1583
Latilactobacillus curvatus	PHG7	28038
Furfurilactobacillus rossiae	PHG7	231049
Terribacillus aidingensis	PHG7	586416
Gemella sanguinis	PHG7	84135
Berryella intestinalis	PHG7	1531429
Slackia heliotrinireducens	PHG7	84110
Olsenella uli	PHG7	133926
Actinomyces sp. HMT 175	PHG7	2789425
Actinomyces sp. MAS-1	PHG7	2755559
Actinomyces sp. Chiba101	PHG7	1851395
Actinomyces sp. Z16	PHG7	2079536
Actinomyces sp. oral taxon 897	PHG7	2081702
Actinomyces sp. HMT897	PHG7	2789424
Actinomyces howellii	PHG7	52771
Actinomyces qiguomingii	PHG7	2057800
Actinomyces respiraculi	PHG7	2744574
Actinomyces slackii	PHG7	52774
Actinomyces wuliandei	PHG7	2057743
Actinomyces procaprae	PHG7	2560010
Actinomyces faecalis	PHG7	2722820
Actinomyces lilanjuaniae	PHG7	2321394
Actinomyces marmotae	PHG7	2737173
Actinomyces weissii	PHG7	675090
Actinomyces trachealis	PHG7	2763540
Schaalia meyeri	PHG7	52773
Schaalia sp. 19OD2882	PHG7	2794089
Schaalia sp. ZJ405	PHG7	2709403
Schaalia turicensis	PHG7	131111
Rothia aeria	PHG7	172042
Micrococcus luteus	PHG7	1270
Cellulosimicrobium cellulans	PHG7	1710
Propionibacterium acidifaciens	PHG7	556499
Escherichia sp. E4742	PHG7	2044467
Citrobacter sp. RHB25-C09	PHG7	2742624
Citrobacter amalonaticus	PHG7	35703
Klebsiella aerogenes	PHG7	548
Raoultella ornithinolytica	PHG7	54291
Enterobacter cloacae	PHG7	550
Salmonella bongori	PHG7	54736
Leclercia adecarboxylata	PHG7	83655
Aeromonas caviae	PHG7	648
Fusobacterium necrophorum	PHG7	859
Lactococcus carnosus	PHG7	2749961
Streptomyces mobaraensis	PHG7	35621
Streptococcus salivarius	PHG8	1304
Streptococcus parasanguinis	PHG8	1318
Enterococcus faecium	PHG8	1352
Blautia obeum	PHG8	40520
Blautia argi	PHG8	1912897
Blautia producta	PHG8	33035
uncultured Blautia sp.	PHG8	765821
Blautia liquoris	PHG8	2779518
Anaerostipes rhamnosivorans	PHG8	1229621
[Ruminococcus] torques	PHG8	33039
[Eubacterium] rectale	PHG8	39491
Roseburia intestinalis	PHG8	166486
Roseburia hominis	PHG8	301301
Roseburia sp. NSJ-69	PHG8	2763062
Anaerobutyricum hallii	PHG8	39488
Coprococcus comes	PHG8	410072
[Clostridium] scindens	PHG8	29347
[Clostridium] hylemonae	PHG8	89153
Dorea longicatena	PHG8	88431
Lachnospiraceae bacterium	PHG8	1898203
Lachnospiraceae bacterium GAM79	PHG8	2109691
Anaerocolumna sedimenticola	PHG8	2696063
Lachnospira eligens	PHG8	39485
Faecalicatena sp. Marseille-Q4148	PHG8	2823316
Wansuia hejianensis	PHG8	2763667
Oscillospiraceae bacterium	PHG8	2485925
[Eubacterium] siraeum	PHG8	39492
Thermoclostridium stercorarium	PHG8	1510
Clostridium sp. SY8519	PHG8	1042156
Clostridium saccharoperbutylacetonicum	PHG8	36745
Clostridioides difficile	PHG8	1496
butyrate-producing bacterium SS3/4	PHG8	245014
uncultured Clostridia bacterium	PHG8	244328
Adlercreutzia hattorii	PHG8	2707299
Adlercreutzia equolifaciens	PHG8	446660
Rhizobium leguminosarum	PHG8	384
Blautia pseudococcoides	PHG8	1796616
Coprococcus eutactus	PHG8	33043
Wujia chipingensis	PHG8	2763670
Anaerocolumna chitinilytica	PHG8	1727145
Butyrivibrio hungatei	PHG8	185008
Butyrivibrio fibrisolvens	PHG8	831
Cellulosilyticum sp. WCF-2	PHG8	2497860
Lacrimispora saccharolytica	PHG8	84030
Lacrimispora sphenoides	PHG8	29370
Simiaoa sunii	PHG8	2763672
Lachnoanaerobaculum umeaense	PHG8	617123
Novisyntrophococcus fermenticellae	PHG8	2068655
Qiania dongpingensis	PHG8	2763669
Vescimonas fastidiosa	PHG8	2714353
Clostridium sp. DL-VIII	PHG8	641107
Paraclostridium bifermentans	PHG8	1490
Eubacterium sp. MSJ-33	PHG8	2841528
Aminipila butyrica	PHG8	433296
Romboutsia ilealis	PHG8	1115758
Clostridiales bacterium CCNA10	PHG8	2109688
Vallitalea pronyensis	PHG8	1348613
Staphylococcus epidermidis	PHG8	1282
Streptococcus vestibularis	PHG8	1343
Streptococcus sp. HSISM1	PHG8	1316408
Streptococcus sp. LPB0220	PHG8	2610896
Streptococcus sp. HSISS3	PHG8	1316412
Streptococcus sp. HSISS2	PHG8	1316411
Streptococcus anginosus	PHG8	1328
Streptococcus mitis	PHG8	28037
Streptococcus mutans	PHG8	1309
Streptococcus oralis	PHG8	1303
Streptococcus lactarius	PHG8	684066
Lactobacillus gasseri	PHG8	1596
Lactobacillus crispatus	PHG8	47770
Leuconostoc gelidum	PHG8	1244
Ligilactobacillus salivarius	PHG8	1624
Faecalibacillus intestinalis	PHG8	1982626
Turicibacter sanguinis	PHG8	154288
Bifidobacterium breve	PHG8	1685
Actinomyces sp. oral taxon 169	PHG8	712116
Eggerthella guodeyinii	PHG8	2690837
Gordonibacter urolithinfaciens	PHG8	1335613
Gordonibacter pamelaeae	PHG8	471189
Raoultibacter timonensis	PHG8	1907662
Bacteriophage sp.	PHG8	38018
Anaerocolumna cellulosilytica	PHG8	433286
Clostridium butyricum	PHG8	1492
Clostridium novyi	PHG8	1542
Gardnerella vaginalis	PHG8	2702
Ruminococcus sp. FMBCY1	PHG8	2831966
Ruminococcus bovis	PHG8	2564099
Ruminococcus champanellensis	PHG8	1161942
Ruminococcus albus	PHG8	1264
Acutalibacter muris	PHG8	1796620
Oscillibacter sp. NSJ-62	PHG8	2763056
Lachnoclostridium phytofermentans	PHG8	66219
Coprococcus sp. ART55/1	PHG8	751585
Butyrivibrio proteoclasticus	PHG8	43305
Pseudobutyrivibrio xylanivorans	PHG8	185007
Herbinix luporum	PHG8	1679721
Cellulosilyticum lentocellum	PHG8	29360
Alkalibacter sp. ES005	PHG8	2815577
Clostridium sp. C5S11	PHG8	704125
Clostridium sp. BJN0001	PHG8	2930219
Clostridium cadaveris	PHG8	1529
Clostridium baratii	PHG8	1561
Clostridium kluyveri	PHG8	1534
Clostridium manihotivorum	PHG8	2320868
Caloramator sp. E03	PHG8	2576307
Aminipila terrae	PHG8	2697030
Aminipila luticellarii	PHG8	2507160
Emergencia timonensis	PHG8	1776384
Clostridioides sp. ES-W-0016-02	PHG8	2770788
Romboutsia hominis	PHG8	1507512
Terrisporobacter sp. MCA3	PHG8	2813371
Paeniclostridium sordellii	PHG8	1505
Peptoclostridium acidaminophilum	PHG8	1731
Tepidibacter sp. 8C15b	PHG8	2925782
Vallitalea guaymasensis	PHG8	1185412
Streptococcus sp. FDAARGOS_192	PHG8	1839799
Streptococcus sp. oral taxon 064	PHG8	712624
Streptococcus sp. NCTC 11567	PHG8	2583584
Streptococcus milleri	PHG8	33040
Streptococcus pseudopneumoniae	PHG8	257758
Streptococcus sobrinus	PHG8	1310
Lactococcus raffinolactis	PHG8	1366
Levilactobacillus brevis	PHG8	1580
Companilactobacillus paralimentarius	PHG8	83526
Paenibacillus peoriae	PHG8	59893
Ndongobacter massiliensis	PHG8	1871025
Eggerthella sp. YY7918	PHG8	502558
Cryptobacterium curtum	PHG8	84163
Actinomyces radicidentis	PHG8	111015
Clavibacter michiganensis	PHG8	28447
Scardovia inopinata	PHG8	78259
Parascardovia denticolens	PHG8	78258
Corynebacterium glutamicum	PHG8	1718
Conexibacter sp. SYSU D00693	PHG8	2812560
Stenotrophomonas maltophilia	PHG8	40324
Streptococcus periodonticum	PHG8	2490633
Paenibacillus sp. DR312	PHG8	2871175
Blautia sp. NBRC 113351	PHG9	2877527
[Ruminococcus] gnavus	PHG9	33038
Coprococcus catus	PHG9	116085
[Clostridium] symbiosum	PHG9	1512
Enterocloster bolteae	PHG9	208479
Enterocloster clostridioformis	PHG9	1531
Faecalibacterium prausnitzii	PHG9	853
Faecalibacterium sp. IP329	PHG9	2929489
Faecalibacterium sp. I2392	PHG9	2929490
Faecalibacterium sp. I4384	PHG9	2929495
Faecalibacterium sp. I4179	PHG9	2929494
Flavonifractor plautii	PHG9	292800
Vescimonas coprocola	PHG9	2714355
Clostridium sp. M62/1	PHG9	411486
Eubacterium callanderi	PHG9	53442
Eubacterium sp. c-25	PHG9	2841037
Eubacterium limosum	PHG9	1736
Romboutsia sp. CE17	PHG9	2724150
Christensenella sp. Marseille-P3954	PHG9	2086585
Clostridia bacterium UC5.1-1D4	PHG9	1697784
[Clostridium] innocuum	PHG9	1522
Longicatena caecimuris	PHG9	1796635
Eggerthella lenta	PHG9	84112
Pseudomonas aeruginosa	PHG9	287
Bradyrhizobium diazoefficiens	PHG9	1355477
Bacteroides uniformis	PHG9	820
Bacteroides ovatus	PHG9	28116
Bacteroides sp. M10	PHG9	2763022
Bacteroides xylanisolvens	PHG9	371601
Bacteroides caccae	PHG9	47678
Bacteroides luhongzhouii	PHG9	2650158
Bacteroides cellulosilyticus	PHG9	246787
Bacteroides fragilis	PHG9	817
Phocaeicola dorei	PHG9	357276
Phocaeicola vulgatus	PHG9	821
Phocaeicola salanitronis	PHG9	376805
Parabacteroides distasonis	PHG9	823
Parabacteroides johnsonii	PHG9	387661
Alistipes onderdonkii	PHG9	328813
Alistipes dispar	PHG9	2585119
Alistipes shahii	PHG9	328814
Alistipes communis	PHG9	2585118
Odoribacter splanchnicus	PHG9	28118
Akkermansia muciniphila	PHG9	239935
Anaerostipes caccae	PHG9	105841
Lachnoclostridium sp. YL32	PHG9	1834196
Lachnoclostridium phocaeense	PHG9	1871021
Sellimonas intestinalis	PHG9	1653434
Faecalibacterium sp. HTFF	PHG9	2929491
Faecalibacterium sp. I3389	PHG9	2929493
Faecalibacterium sp. I3333	PHG9	2929492
Anaerotruncus colihominis	PHG9	169435
Dysosmobacter welbionis	PHG9	2093857
Dysosmobacter sp. Marseille-Q4140	PHG9	2830675
Pusillibacter faecalis	PHG9	2714358
Solibaculum mannosilyticum	PHG9	2780922
Hungatella hathewayi	PHG9	154046
Clostridium sp. C1	PHG9	1155388
Eubacterium sp. NSJ-61	PHG9	2764325
Eubacterium maltosivorans	PHG9	2041044
Intestinimonas butyriciproducens	PHG9	1297617
Lawsonibacter asaccharolyticus	PHG9	2108523
Massilistercora timonensis	PHG9	2086584
Streptococcus gordonii	PHG9	1302
Lactobacillus delbrueckii	PHG9	1584
Catenibacterium sp. co_0103	PHG9	2478954
Phascolarctobacterium faecium	PHG9	33025
Bifidobacterium dentium	PHG9	1689
Rothia dentocariosa	PHG9	2047
Rothia mucilaginosa	PHG9	43675
Propionibacterium freudenreichii	PHG9	1744
Arabiibacter massiliensis	PHG9	1870985
Bacteroides sp. A1C1	PHG9	2528203
Bacteroides sp. CBA7301	PHG9	2715212
Bacteroides sp. KGMB10229	PHG9	2884447
Bacteroides stercoris	PHG9	46506
Bacteroides zhangwenhongii	PHG9	2650157
Bacteroides faecis	PHG9	674529
Bacteroides intestinalis	PHG9	329854
Bacteroides caecimuris	PHG9	1796613
Alistipes finegoldii	PHG9	214856
Alistipes senegalensis	PHG9	1288121
Alistipes sp. dk3624	PHG9	2662363
Alistipes megaguti	PHG9	2364787
Parabacteroides goldsteinii	PHG9	328812
Butyricimonas faecalis	PHG9	2093856
Prevotella intermedia	PHG9	28131
Paraprevotella xylaniphila	PHG9	454155
Haemophilus parainfluenzae	PHG9	729
Cupriavidus taiwanensis	PHG9	164546
Variovorax paradoxus	PHG9	34073
Desulfovibrio piger	PHG9	901
Sorangium cellulosum	PHG9	56
Enterococcus avium	PHG9	33945
Acidaminococcus intestini	PHG9	187327
Veillonella atypica	PHG9	39777
Bifidobacterium animalis	PHG9	28025
Citrobacter freundii	PHG9	546
Turicimonas muris	PHG9	1796652
Bacteroides eggerthii	PHG9	28111
Alistipes indistinctus	PHG9	626932
crAssphage cr113_1	PHG9	2772087
Faecalibacterium sp. IP118	PHG9	2929488
Ruthenibacterium lactatiformans	PHG9	1550024
Monoglobus pectinilyticus	PHG9	1981510
Anaerotignum propionicum	PHG9	28446
Streptococcus agalactiae	PHG9	1311
Enterococcus thailandicus	PHG9	417368
Enterococcus gallinarum	PHG9	1353
Enterococcus casseliflavus	PHG9	37734
Enterococcus sp. M190262	PHG9	2582830
Paenibacillus sp. B01	PHG9	2660554
Erysipelotrichaceae bacterium I46	PHG9	1834207
Veillonella parvula	PHG9	29466
Veillonella dispar	PHG9	39778
Dialister pneumosintes	PHG9	39950
Phoenicibacter congonensis	PHG9	1944646
Denitrobacterium detoxificans	PHG9	79604
Parafannyhessea umbonata	PHG9	604330
Bifidobacterium saguini	PHG9	762210
Mycobacterium marinum	PHG9	1781
Mycolicibacterium phocaicum	PHG9	319706
Amycolatopsis acidiphila	PHG9	715473
Bacteroides sp. HF-162	PHG9	2785531
Bacteroides sp. CACC 737	PHG9	2755405
Bacteroides sp. KGMB07931	PHG9	2792859
Bacteroides helcogenes	PHG9	290053
Bacteroides nordii	PHG9	291645
Bacteroides zoogleoformans	PHG9	28119
Phocaeicola coprophilus	PHG9	387090
Parabacteroides sp. CT06	PHG9	2025876
Barnesiella viscericola	PHG9	397865
Coprobacter secundus	PHG9	1501392
Prevotella nigrescens	PHG9	28133
Sodaliphilus pleomorphus	PHG9	2606626
Citrobacter portucalensis	PHG9	1639133
Shigella flexneri	PHG9	623
Shigella boydii	PHG9	621
Shigella sonnei	PHG9	624
Halopseudomonas aestusnigri	PHG9	857252
Luteimonas sp. MC1825	PHG9	2761107
Sutterella megalosphaeroides	PHG9	2494234
Campylobacter jejuni	PHG9	197
Desulfovibrio desulfuricans	PHG9	876
Nanosynbacter sp. HMT-352	PHG9	2899133
crAssphage cr109_1	PHG9	2772083
Lactobacillus paragasseri	PHG9	2107999

## Sheet: S7-2
Table S7-2. Correlation Cluster in Small Intestine
Species	Cluster Group	NCBI taxonomy ID
Homo sapiens	PHG1	9606
Saccharomyces cerevisiae	PHG2	4932
Naumovozyma castellii	PHG2	27288
Kluyveromyces marxianus	PHG2	4911
Eremothecium cymbalariae	PHG2	45285
Candida dubliniensis	PHG2	42374
Pichia kudriavzevii	PHG2	4909
Yarrowia lipolytica	PHG2	4952
Sugiyamaella lignohabitans	PHG2	796027
Saccharomycodes ludwigii	PHG2	36035
Botrytis cinerea	PHG2	40559
Fusarium poae	PHG2	36050
Fusarium graminearum	PHG2	5518
Fusarium venenatum	PHG2	56646
Fusarium musae	PHG2	1042133
Purpureocillium takamizusanense	PHG2	2060973
Drechmeria coniospora	PHG2	98403
Ustilaginoidea virens	PHG2	1159556
Pochonia chlamydosporia	PHG2	280754
Colletotrichum higginsianum	PHG2	80884
Thermothelomyces thermophilus	PHG2	78579
Neurospora crassa	PHG2	5141
Pyricularia grisea	PHG2	148305
Pyricularia pennisetigena	PHG2	1578925
Aspergillus luchuensis	PHG2	1069201
Talaromyces rugulosus	PHG2	121627
Zymoseptoria tritici	PHG2	1047171
Psilocybe cubensis	PHG2	181762
Puccinia striiformis	PHG2	27350
Sporisorium graminicola	PHG2	280036
Ustilago maydis	PHG2	5270
Toxoplasma gondii	PHG2	5811
Besnoitia besnoiti	PHG2	94643
Neospora caninum	PHG2	29176
Plasmodium malariae	PHG2	5858
Plasmodium vivax	PHG2	5855
Plasmodium cynomolgi	PHG2	5827
Plasmodium knowlesi	PHG2	5850
Plasmodium coatneyi	PHG2	208452
Plasmodium yoelii	PHG2	5861
Thalassiosira pseudonana	PHG2	35128
Phaeodactylum tricornutum	PHG2	2850
Trypanosoma brucei	PHG2	5691
Leishmania donovani	PHG2	5661
Leishmania major	PHG2	5664
Leishmania braziliensis	PHG2	5660
Leishmania panamensis	PHG2	5679
Dictyostelium discoideum	PHG2	44689
Bacillus dafuensis	PHG2	1742359
Amphibacillus xylanus	PHG2	1449
Nocardia gipuzkoensis	PHG2	2749991
Arthrobacter sp. KBS0702	PHG2	2578107
Streptomyces sp. GMY02	PHG2	1333528
Prochlorococcus marinus	PHG2	1219
Legionella pneumophila	PHG2	446
Legionella israelensis	PHG2	454
Legionella antarctica	PHG2	2708020
Venatorbacter cucullus	PHG2	2661630
Polynucleobacter sp. MG-Unter2-18	PHG2	2081052
Kinneretia sp. DAIF2	PHG2	2714952
Fluviibacter phosphoraccumulans	PHG2	1751046
Granulibacter bethesdensis	PHG2	364410
Flavobacterium johnsoniae	PHG2	986
Naumovozyma dairenensis	PHG3	27289
Tetrapisispora blattae	PHG3	1071379
Candida tropicalis	PHG3	5482
Fusarium pseudograminearum	PHG3	101028
Fusarium oxysporum	PHG3	5507
Fusarium verticillioides	PHG3	117187
Fusarium fujikuroi	PHG3	5127
Thermothielavioides terrestris	PHG3	2587410
Aspergillus oryzae	PHG3	5062
Aspergillus puulaauensis	PHG3	1220207
Aspergillus chevalieri	PHG3	182096
Schizosaccharomyces pombe	PHG3	4896
Cryptococcus neoformans	PHG3	5207
Cryptosporidium parvum	PHG3	5807
Babesia bigemina	PHG3	5866
Plasmodium sp. gorilla clade G2	PHG3	880535
Leishmania infantum	PHG3	5671
Leishmania mexicana	PHG3	5665
Giardia intestinalis	PHG3	5741
Staphylococcus condimenti	PHG3	70255
Staphylococcus capitis	PHG3	29388
Lysinibacillus fusiformis	PHG3	28031
Enterococcus faecalis	PHG3	1351
Clostridium botulinum	PHG3	1491
Escherichia coli	PHG3	562
Klebsiella quasipneumoniae	PHG3	1463165
Klebsiella pneumoniae	PHG3	573
Enterobacter asburiae	PHG3	61645
Cedecea neteri	PHG3	158822
Salmonella enterica	PHG3	28901
Lelliottia amnigena	PHG3	61646
Pseudomonas fluorescens	PHG3	294
Pseudomonas frederiksbergensis	PHG3	104087
Candidatus Portiera aleyrodidarum	PHG3	91844
Acinetobacter baumannii	PHG3	470
Methylomagnum ishizawai	PHG3	1760988
Ralstonia solanacearum	PHG3	305
Methylorubrum extorquens	PHG3	408
Paracoccus mutanolyticus	PHG3	1499308
Chryseobacterium sp. 3008163	PHG3	2478663
Phocaeicola dorei	PHG3	357276
Parabacteroides johnsonii	PHG3	387661
Parabacteroides merdae	PHG3	46503
Odoribacter splanchnicus	PHG3	28118
Prosthecochloris sp. HL-130-GSB	PHG3	1974213
Leptospira santarosai	PHG3	28183
Methanosarcina mazei	PHG3	2209
Halosimplex litoreum	PHG3	1198301
Synechococcus phage S-CAM8	PHG3	754038
Torulaspora delbrueckii	PHG3	4950
Lactiplantibacillus plantarum	PHG3	1590
Phascolarctobacterium faecium	PHG3	33025
Streptomyces armeniacus	PHG3	83291
Bacteroides zhangwenhongii	PHG3	2650157
Bacteroides salyersiae	PHG3	291644
Parabacteroides goldsteinii	PHG3	328812
Butyricimonas virosa	PHG3	544645
Prevotella melaninogenica	PHG3	28132
Escherichia albertii	PHG3	208962
Escherichia fergusonii	PHG3	564
Escherichia marmotae	PHG3	1499973
Klebsiella variicola	PHG3	244366
Enterobacter hormaechei	PHG3	158836
Cronobacter sakazakii	PHG3	28141
Gardnerella vaginalis	PHG3	2702
Klebsiella oxytoca	PHG3	571
Citrobacter freundii	PHG3	546
Veillonella nakazawae	PHG3	2682456
Bacteroides sp. KGMB07931	PHG3	2792859
Prevotella histicola	PHG3	470565
Escherichia sp. E4742	PHG3	2044467
Citrobacter sp. R56	PHG3	1573676
Citrobacter sp. RHB25-C09	PHG3	2742624
Citrobacter farmeri	PHG3	67824
Citrobacter amalonaticus	PHG3	35703
Klebsiella aerogenes	PHG3	548
Klebsiella michiganensis	PHG3	1134687
Enterobacter cloacae	PHG3	550
Shigella flexneri	PHG3	623
Shigella boydii	PHG3	621
Shigella dysenteriae	PHG3	622
Salmonella bongori	PHG3	54736
Leclercia adecarboxylata	PHG3	83655
[Enterobacter] lignolyticus	PHG3	1334193
Stenotrophomonas maltophilia	PHG3	40324
Aeromonas caviae	PHG3	648
Sutterella wadsworthensis	PHG3	40545
Fusobacterium ulcerans	PHG3	861
Tenacibaculum sp. SZ-18	PHG3	754423
Acinetobacter junii	PHG3	40215
Xanthobacter autotrophicus	PHG3	280
Tetrapisispora phaffii	PHG4	113608
Gemella morbillorum	PHG4	29391
Streptococcus pneumoniae	PHG4	1313
Streptococcus thermophilus	PHG4	1308
Streptococcus sp. A12	PHG4	1759399
Streptococcus australis	PHG4	113107
Streptococcus parasanguinis	PHG4	1318
Streptococcus ilei	PHG4	1156431
Streptococcus koreensis	PHG4	2382163
Lactococcus piscium	PHG4	1364
Latilactobacillus sakei	PHG4	1599
Leuconostoc carnosum	PHG4	1252
Lactobacillus helveticus	PHG4	1587
Pediococcus acidilactici	PHG4	1254
Abiotrophia defectiva	PHG4	46125
Blautia massiliensis	PHG4	1737424
Blautia sp. SC05B48	PHG4	2479767
Anaerostipes hadrus	PHG4	649756
Ruminococcus sp. SR1/5	PHG4	657323
Clostridium sp. AWRP	PHG4	2212991
Clostridium saccharoperbutylacetonicum	PHG4	36745
Romboutsia sp. CE17	PHG4	2724150
Mogibacterium diversum	PHG4	114527
Erysipelatoclostridium ramosum	PHG4	1547
Parvimonas micra	PHG4	33033
Lawsonella clevelandensis	PHG4	1528099
Actinomyces graevenitzii	PHG4	55565
Actinomyces naeslundii	PHG4	1655
Actinomyces sp. oral taxon 414	PHG4	712122
Actinomyces pacaensis	PHG4	1852377
Actinomyces oris	PHG4	544580
Schaalia odontolytica	PHG4	1660
Schaalia cardiffensis	PHG4	181487
Pauljensenia hongkongensis	PHG4	178339
Arachnia propionica	PHG4	1750
Lancefieldella parvula	PHG4	1382
Tepiditoga spiralis	PHG4	2108365
Aminipila butyrica	PHG4	433296
Romboutsia ilealis	PHG4	1115758
Streptococcus sp. HSISM1	PHG4	1316408
Streptococcus sp. LPB0220	PHG4	2610896
Streptococcus gordonii	PHG4	1302
Streptococcus intermedius	PHG4	1338
Streptococcus mitis	PHG4	28037
Streptococcus sanguinis	PHG4	1305
Streptococcus lactarius	PHG4	684066
Lactococcus garvieae	PHG4	1363
Granulicatella adiacens	PHG4	46124
Streptomyces sp. ICC4	PHG4	2099584
Actinomyces sp. oral taxon 171	PHG4	706438
Actinomyces viscosus	PHG4	1656
Olsenella sp. oral taxon 807	PHG4	712411
Enterococcus cecorum	PHG4	44008
Granulicatella elegans	PHG4	137732
Veillonella atypica	PHG4	39777
Fusobacterium nucleatum	PHG4	851
Clostridium cadaveris	PHG4	1529
Mogibacterium pumilum	PHG4	86332
Terrisporobacter sp. MCA3	PHG4	2813371
Peptacetobacter hiranonis	PHG4	89152
Filifactor alocis	PHG4	143361
Streptococcus sp. oral taxon 061	PHG4	712623
Streptococcus sp. oral taxon 431	PHG4	712633
Streptococcus sp. 116-D4	PHG4	2598453
Streptococcus sp. NSJ-72	PHG4	2763068
Streptococcus sp. NPS 308	PHG4	1902136
Streptococcus sp. NCTC 11567	PHG4	2583584
Streptococcus constellatus	PHG4	76860
Streptococcus pyogenes	PHG4	1314
Streptococcus equi	PHG4	1336
Streptococcus dysgalactiae	PHG4	1334
Streptococcus infantis	PHG4	68892
Streptococcus cristatus	PHG4	45634
Streptococcus porcinus	PHG4	1340
Streptococcus rubneri	PHG4	1234680
Streptococcus pseudoporcinus	PHG4	361101
Streptococcus gwangjuense	PHG4	1433513
Streptococcus canis	PHG4	1329
Lactococcus raffinolactis	PHG4	1366
Leuconostoc mesenteroides	PHG4	1245
Leuconostoc citreum	PHG4	33964
Furfurilactobacillus rossiae	PHG4	231049
Gemella sanguinis	PHG4	84135
Bulleidia sp. zg-1006	PHG4	2806552
Murdochiella vaginalis	PHG4	1852373
Helcococcus kunzii	PHG4	40091
Finegoldia magna	PHG4	1260
Ezakiella coagulans	PHG4	46507
Slackia heliotrinireducens	PHG4	84110
Olsenella uli	PHG4	133926
Actinomyces sp. HMT 175	PHG4	2789425
Actinomyces sp. MAS-1	PHG4	2755559
Actinomyces sp. oral taxon 897	PHG4	2081702
Actinomyces sp. HMT897	PHG4	2789424
Actinomyces howellii	PHG4	52771
Actinomyces radicidentis	PHG4	111015
Actinomyces respiraculi	PHG4	2744574
Actinomyces slackii	PHG4	52774
Schaalia meyeri	PHG4	52773
Schaalia sp. 19OD2882	PHG4	2794089
Schaalia turicensis	PHG4	131111
Arachnia rubra	PHG4	1547448
Propionibacterium acidifaciens	PHG4	556499
Candida albicans	PHG5	5476
Anoxybacillus kamchatkensis	PHG5	196180
Limosilactobacillus fermentum	PHG5	1613
Enterocloster bolteae	PHG5	208479
Eubacterium callanderi	PHG5	53442
Eubacterium limosum	PHG5	1736
Erysipelotrichaceae bacterium 66202529	PHG5	2676062
Streptomyces sp. ICC1	PHG5	2099583
Bifidobacterium longum	PHG5	216816
Pseudomonas aeruginosa	PHG5	287
Burkholderia pseudomallei	PHG5	28450
Ralstonia insidiosa	PHG5	190721
Ralstonia pickettii	PHG5	329
Bradyrhizobium erythrophlei	PHG5	1437360
Bradyrhizobium diazoefficiens	PHG5	1355477
Sphingomonas melonis	PHG5	152682
Bacteroides thetaiotaomicron	PHG5	818
Bacteroides uniformis	PHG5	820
Bacteroides ovatus	PHG5	28116
Bacteroides sp. M10	PHG5	2763022
Bacteroides xylanisolvens	PHG5	371601
Bacteroides caccae	PHG5	47678
Bacteroides luhongzhouii	PHG5	2650158
Bacteroides cellulosilyticus	PHG5	246787
Bacteroides fragilis	PHG5	817
Phocaeicola vulgatus	PHG5	821
Parabacteroides distasonis	PHG5	823
Alistipes onderdonkii	PHG5	328813
Alistipes dispar	PHG5	2585119
Alistipes shahii	PHG5	328814
Alistipes communis	PHG5	2585118
Akkermansia muciniphila	PHG5	239935
Malassezia restricta	PHG5	76775
Anaerotruncus colihominis	PHG5	169435
Geobacillus sp. JS12	PHG5	1813182
Geobacillus zalihae	PHG5	213419
Geobacillus stearothermophilus	PHG5	1422
Anoxybacillus gonensis	PHG5	198467
Anoxybacillus flavithermus	PHG5	33934
Limosilactobacillus oris	PHG5	1632
Lacticaseibacillus rhamnosus	PHG5	47715
Bifidobacterium adolescentis	PHG5	1680
Bifidobacterium pseudocatenulatum	PHG5	28026
Bifidobacterium bifidum	PHG5	1681
Bifidobacterium catenulatum	PHG5	1686
Rothia dentocariosa	PHG5	2047
Corynebacterium matruchotii	PHG5	43768
Cutibacterium acnes	PHG5	1747
Arabiibacter massiliensis	PHG5	1870985
Bacteroides sp. A1C1	PHG5	2528203
Bacteroides sp. CBA7301	PHG5	2715212
Bacteroides stercoris	PHG5	46506
Bacteroides faecis	PHG5	674529
Bacteroides intestinalis	PHG5	329854
Bacteroides caecimuris	PHG5	1796613
Alistipes finegoldii	PHG5	214856
Alistipes senegalensis	PHG5	1288121
Alistipes megaguti	PHG5	2364787
Butyricimonas faecalis	PHG5	2093856
Prevotella copri	PHG5	165179
Sphingomonas sp. NIC1	PHG5	1961362
Desulfovibrio piger	PHG5	901
Geobacillus sp. Y412MC52	PHG5	550542
Parageobacillus caldoxylosilyticus	PHG5	81408
Listeria monocytogenes	PHG5	1639
Streptococcus lutetiensis	PHG5	150055
Streptococcus infantarius	PHG5	102684
Acidaminococcus intestini	PHG5	187327
Mycobacterium paragordonae	PHG5	1389713
Ralstonia sp. 56D2	PHG5	2842456
Ralstonia mannitolilytica	PHG5	105219
Bacteroides eggerthii	PHG5	28111
Alistipes indistinctus	PHG5	626932
Anaerotignum propionicum	PHG5	28446
Streptococcus equinus	PHG5	1335
Streptococcus pseudopneumoniae	PHG5	257758
Streptococcus gallolyticus	PHG5	315405
Lactobacillus johnsonii	PHG5	33959
Lactobacillus acidophilus	PHG5	1579
Geobacillus subterraneus	PHG5	129338
Geobacillus thermocatenulatus	PHG5	33938
Gemella haemolysans	PHG5	1379
Veillonella parvula	PHG5	29466
Curtobacterium flaccumfaciens	PHG5	2035
Bifidobacterium imperatoris	PHG5	2020965
Mycobacterium gordonae	PHG5	1778
Thermus brockianus	PHG5	56956
Bacteroides sp. HF-162	PHG5	2785531
Bacteroides sp. CACC 737	PHG5	2755405
Phocaeicola coprophilus	PHG5	387090
Parabacteroides sp. CT06	PHG5	2025876
Tannerella forsythia	PHG5	28112
Barnesiella viscericola	PHG5	397865
Pseudomonas stutzeri	PHG5	316
Desulfovibrio desulfuricans	PHG5	876
Desulfovibrio vulgaris	PHG5	881
CrAss-like virus sp.	PHG5	2831617
Geobacillus sp. GHH01	PHG5	1233873
Geobacillus sp. C56-T3	PHG5	691437
Geobacillus thermoleovorans	PHG5	33941
Streptococcus sp. CNU G3	PHG5	2698804
Streptococcus sp. CNU G2	PHG5	2686210
Pyricularia oryzae	PHG6	318829
Faecalibacterium prausnitzii	PHG6	853
Faecalibacterium sp. I2392	PHG6	2929490
Faecalibacterium sp. I4384	PHG6	2929495
Faecalibacterium sp. I4179	PHG6	2929494
Treponema denticola	PHG6	158
Faecalibacterium sp. HTFF	PHG6	2929491
Faecalibacterium sp. I3389	PHG6	2929493
Faecalibacterium sp. I3333	PHG6	2929492
Nostoc sp. CENA543	PHG6	1869241
Prevotella intermedia	PHG6	28131
Haemophilus parainfluenzae	PHG6	729
Cupriavidus malaysiensis	PHG6	367825
Faecalibacterium sp. IP118	PHG6	2929488
Bifidobacterium pullorum	PHG6	78448
Campylobacter coli	PHG6	195
Staphylococcus aureus	PHG7	1280
Streptococcus salivarius	PHG7	1304
Streptococcus suis	PHG7	1307
[Clostridium] scindens	PHG7	29347
[Clostridium] symbiosum	PHG7	1512
Dorea longicatena	PHG7	88431
Enterocloster clostridioformis	PHG7	1531
Faecalibacterium sp. IP329	PHG7	2929489
Flavonifractor plautii	PHG7	292800
Adlercreutzia hattorii	PHG7	2707299
Adlercreutzia equolifaciens	PHG7	446660
Collinsella aerofaciens	PHG7	74426
Parolsenella massiliensis	PHG7	1871022
Pseudomonas putida	PHG7	303
Rhizobium leguminosarum	PHG7	384
Lachnoclostridium sp. YL32	PHG7	1834196
Pusillibacter faecalis	PHG7	2714358
Solibaculum mannosilyticum	PHG7	2780922
Hungatella hathewayi	PHG7	154046
Clostridium perfringens	PHG7	1502
Paraclostridium bifermentans	PHG7	1490
Eubacterium maltosivorans	PHG7	2041044
Lawsonibacter asaccharolyticus	PHG7	2108523
Staphylococcus epidermidis	PHG7	1282
Streptococcus vestibularis	PHG7	1343
Streptococcus sp. HSISS3	PHG7	1316412
Streptococcus sp. HSISS2	PHG7	1316411
Streptococcus anginosus	PHG7	1328
Streptococcus mutans	PHG7	1309
Lactococcus lactis	PHG7	1358
Lactococcus cremoris	PHG7	1359
Lactobacillus crispatus	PHG7	47770
Leuconostoc gelidum	PHG7	1244
Ligilactobacillus salivarius	PHG7	1624
Faecalibacillus intestinalis	PHG7	1982626
Turicibacter sanguinis	PHG7	154288
Megasphaera massiliensis	PHG7	1232428
Bifidobacterium breve	PHG7	1685
Raoultibacter timonensis	PHG7	1907662
Collinsella stercoris	PHG7	147206
Variovorax paradoxus	PHG7	34073
Limosilactobacillus reuteri	PHG7	1598
Bifidobacterium angulatum	PHG7	1683
Paeniclostridium sordellii	PHG7	1505
Streptococcus sp. FDAARGOS_192	PHG7	1839799
Streptococcus sp. HSISS1	PHG7	1316410
Streptococcus pluranimalium	PHG7	82348
Streptococcus milleri	PHG7	33040
Streptococcus sobrinus	PHG7	1310
Levilactobacillus brevis	PHG7	1580
Companilactobacillus paralimentarius	PHG7	83526
Dialister pneumosintes	PHG7	39950
Berryella intestinalis	PHG7	1531429
Denitrobacterium detoxificans	PHG7	79604
Parolsenella catena	PHG7	2003188
Bifidobacterium scardovii	PHG7	158787
Parascardovia denticolens	PHG7	78258
Corynebacterium segmentosum	PHG7	43990
Corynebacterium accolens	PHG7	38284
Corynebacterium aurimucosum	PHG7	169292
Conexibacter sp. SYSU D00693	PHG7	2812560
Bacillus cereus	PHG8	1396
Bacillus thuringiensis	PHG8	1428
Bacillus mycoides	PHG8	1405
Enterococcus faecium	PHG8	1352
Blautia sp. NBRC 113351	PHG8	2877527
Blautia producta	PHG8	33035
Anaerostipes rhamnosivorans	PHG8	1229621
[Ruminococcus] gnavus	PHG8	33038
Eubacterium sp. c-25	PHG8	2841037
Christensenella sp. Marseille-P3954	PHG8	2086585
Clostridia bacterium UC5.1-1D4	PHG8	1697784
[Clostridium] innocuum	PHG8	1522
Eggerthella lenta	PHG8	84112
Blautia pseudococcoides	PHG8	1796616
Anaerostipes caccae	PHG8	105841
Lachnoclostridium phocaeense	PHG8	1871021
Sellimonas intestinalis	PHG8	1653434
Dysosmobacter sp. Marseille-Q4140	PHG8	2830675
Clostridium sp. C1	PHG8	1155388
Eubacterium sp. NSJ-61	PHG8	2764325
Massilistercora timonensis	PHG8	2086584
Lactobacillus gasseri	PHG8	1596
Catenibacterium sp. co_0103	PHG8	2478954
Bifidobacterium dentium	PHG8	1689
Eggerthella guodeyinii	PHG8	2690837
Gordonibacter urolithinfaciens	PHG8	1335613
Gordonibacter pamelaeae	PHG8	471189
Enterococcus mundtii	PHG8	53346
Enterococcus avium	PHG8	33945
Bifidobacterium animalis	PHG8	28025
Ruthenibacterium lactatiformans	PHG8	1550024
Cellulosilyticum lentocellum	PHG8	29360
Clostridium sporogenes	PHG8	1509
Christensenella minuta	PHG8	626937
Streptococcus acidominimus	PHG8	1326
Streptococcus agalactiae	PHG8	1311
Streptococcus pasteurianus	PHG8	197614
Lacticaseibacillus paracasei	PHG8	1597
Enterococcus gallinarum	PHG8	1353
Enterococcus durans	PHG8	53345
Enterococcus casseliflavus	PHG8	37734
Eggerthella sp. YY7918	PHG8	502558
Parafannyhessea umbonata	PHG8	604330
Lactobacillus paragasseri	PHG8	2107999
Parageobacillus toebii	PHG9	153151
Priestia aryabhattai	PHG9	412384
Priestia megaterium	PHG9	1404
Blautia wexlerae	PHG9	418240
Blautia obeum	PHG9	40520
Blautia argi	PHG9	1912897
uncultured Blautia sp.	PHG9	765821
Blautia liquoris	PHG9	2779518
[Ruminococcus] torques	PHG9	33039
[Eubacterium] rectale	PHG9	39491
Roseburia intestinalis	PHG9	166486
Roseburia hominis	PHG9	301301
Roseburia sp. NSJ-69	PHG9	2763062
Anaerobutyricum hallii	PHG9	39488
Coprococcus comes	PHG9	410072
Coprococcus catus	PHG9	116085
[Clostridium] hylemonae	PHG9	89153
Lachnospiraceae bacterium	PHG9	1898203
Lachnospiraceae bacterium GAM79	PHG9	2109691
Anaerocolumna sedimenticola	PHG9	2696063
Lachnospira eligens	PHG9	39485
Faecalicatena sp. Marseille-Q4148	PHG9	2823316
Wansuia hejianensis	PHG9	2763667
Oscillospiraceae bacterium	PHG9	2485925
[Eubacterium] siraeum	PHG9	39492
Thermoclostridium stercorarium	PHG9	1510
Vescimonas coprocola	PHG9	2714355
Clostridium sp. SY8519	PHG9	1042156
Clostridium sp. M62/1	PHG9	411486
Clostridium neonatale	PHG9	137838
Clostridioides difficile	PHG9	1496
butyrate-producing bacterium SS3/4	PHG9	245014
uncultured Clostridia bacterium	PHG9	244328
Longicatena caecimuris	PHG9	1796635
Faecalitalea cylindroides	PHG9	39483
uncultured human fecal virus	PHG9	239364
Coprococcus eutactus	PHG9	33043
Wujia chipingensis	PHG9	2763670
Anaerocolumna chitinilytica	PHG9	1727145
Butyrivibrio hungatei	PHG9	185008
Butyrivibrio fibrisolvens	PHG9	831
Cellulosilyticum sp. WCF-2	PHG9	2497860
Lacrimispora saccharolytica	PHG9	84030
Lacrimispora sphenoides	PHG9	29370
Simiaoa sunii	PHG9	2763672
Lachnoanaerobaculum umeaense	PHG9	617123
Novisyntrophococcus fermenticellae	PHG9	2068655
Qiania dongpingensis	PHG9	2763669
Vescimonas fastidiosa	PHG9	2714353
Dysosmobacter welbionis	PHG9	2093857
Clostridium sp. DL-VIII	PHG9	641107
Clostridium pasteurianum	PHG9	1501
Clostridiaceae bacterium Marseille-Q4149	PHG9	2830659
Eubacterium sp. MSJ-33	PHG9	2841528
Intestinimonas butyriciproducens	PHG9	1297617
Clostridiales bacterium CCNA10	PHG9	2109688
Vallitalea pronyensis	PHG9	1348613
Symbiobacterium thermophilum	PHG9	2734
Bacillus subtilis	PHG9	1423
Paenibacillus sp. H1-7	PHG9	2282849
Brevibacillus laterosporus	PHG9	1465
Streptococcus oralis	PHG9	1303
Amedibacterium intestinale	PHG9	2583452
Turicibacter sp. H121	PHG9	1712675
Rothia mucilaginosa	PHG9	43675
Corynebacterium argentoratense	PHG9	42817
Actinomyces sp. oral taxon 169	PHG9	712116
Serratia marcescens	PHG9	615
Bacteriophage sp.	PHG9	38018
Paenibacillus rhizovicinus	PHG9	2704463
Paenibacillus polymyxa	PHG9	1406
Paenibacillus agaridevorans	PHG9	171404
Anaerocolumna cellulosilytica	PHG9	433286
Clostridium butyricum	PHG9	1492
Clostridium tetani	PHG9	1513
Clostridium beijerinckii	PHG9	1520
Clostridium novyi	PHG9	1542
Ruminococcus sp. FMBCY1	PHG9	2831966
Ruminococcus bovis	PHG9	2564099
Ruminococcus champanellensis	PHG9	1161942
Ruminococcus albus	PHG9	1264
Acutalibacter muris	PHG9	1796620
Caproiciproducens sp. NJN-50	PHG9	2507162
Monoglobus pectinilyticus	PHG9	1981510
Oscillibacter sp. NSJ-62	PHG9	2763056
Caproicibacter fermentans	PHG9	2576756
Ethanoligenens harbinense	PHG9	253239
Mageeibacillus indolicus	PHG9	884684
Lachnoclostridium phytofermentans	PHG9	66219
Coprococcus sp. ART55/1	PHG9	751585
Butyrivibrio proteoclasticus	PHG9	43305
Pseudobutyrivibrio xylanivorans	PHG9	185007
Herbinix luporum	PHG9	1679721
Clostridium baratii	PHG9	1561
Clostridium manihotivorum	PHG9	2320868
Clostridium argentinense	PHG9	29341
Geosporobacter ferrireducens	PHG9	1424294
Aminipila terrae	PHG9	2697030
Aminipila luticellarii	PHG9	2507160
Emergencia timonensis	PHG9	1776384
Flintibacter sp. KGMB00164	PHG9	2610895
Romboutsia hominis	PHG9	1507512
Peptoclostridium acidaminophilum	PHG9	1731
Desulfosporosinus orientis	PHG9	1563
Vallitalea guaymasensis	PHG9	1185412
Streptococcus sp. oral taxon 064	PHG9	712624
Bacillus velezensis	PHG9	492670
Bacillus amyloliquefaciens	PHG9	1390
Paenibacillus sp. B01	PHG9	2660554
Paenibacillus sp. DCT19	PHG9	2211212
Paenibacillus sp. PK3_47	PHG9	2072642
Paenibacillus riograndensis	PHG9	483937
Paenibacillus cellulositrophicus	PHG9	562959
Paenibacillus lautus	PHG9	1401
Brevibacillus choshinensis	PHG9	54911
Tannockella kyphosi	PHG9	2899121
Intestinibaculum porci	PHG9	2487118
Phascolarctobacterium sp. Marseille-Q4147	PHG9	2823317
Megasphaera elsdenii	PHG9	907
Bifidobacterium lemurum	PHG9	1603886
Bifidobacterium saguini	PHG9	762210
Pseudomonas chlororaphis	PHG9	587753
Vibrio fluvialis	PHG9	676
Aeromonas hydrophila	PHG9	644
Agrobacterium tumefaciens	PHG9	358
Burkholderia multivorans	PHG9	87883
Paraburkholderia caribensis	PHG9	75105
Campylobacter jejuni	PHG9	197
Desulfosarcina widdelii	PHG9	947919

## Sheet: S7-3
Table S7-3. Correlation Cluster in Lumen
Species	Cluster Group	NCBI taxonomy ID
Amphibacillus xylanus	PHG1	1449
Arthrobacter sp. KBS0702	PHG1	2578107
Aspergillus luchuensis	PHG1	1069201
Bacillus dafuensis	PHG1	1742359
Besnoitia besnoiti	PHG1	94643
Botrytis cinerea	PHG1	40559
Candida dubliniensis	PHG1	42374
Colletotrichum higginsianum	PHG1	80884
Dictyostelium discoideum	PHG1	44689
Drechmeria coniospora	PHG1	98403
Flavobacterium johnsoniae	PHG1	986
Fluviibacter phosphoraccumulans	PHG1	1751046
Fusarium graminearum	PHG1	5518
Fusarium musae	PHG1	1042133
Fusarium poae	PHG1	36050
Fusarium venenatum	PHG1	56646
Granulibacter bethesdensis	PHG1	364410
Homo sapiens	PHG1	9606
Kluyveromyces marxianus	PHG1	4911
Legionella antarctica	PHG1	2708020
Legionella israelensis	PHG1	454
Legionella pneumophila	PHG1	446
Leishmania braziliensis	PHG1	5660
Leishmania donovani	PHG1	5661
Leishmania infantum	PHG1	5671
Leishmania major	PHG1	5664
Leishmania panamensis	PHG1	5679
Naumovozyma castellii	PHG1	27288
Neospora caninum	PHG1	29176
Neurospora crassa	PHG1	5141
Nocardia gipuzkoensis	PHG1	2749991
Pichia kudriavzevii	PHG1	4909
Plasmodium coatneyi	PHG1	208452
Plasmodium cynomolgi	PHG1	5827
Plasmodium knowlesi	PHG1	5850
Plasmodium malariae	PHG1	5858
Plasmodium vivax	PHG1	5855
Plasmodium yoelii	PHG1	5861
Pochonia chlamydosporia	PHG1	280754
Polynucleobacter sp. MG-Unter2-18	PHG1	2081052
Prochlorococcus marinus	PHG1	1219
Psilocybe cubensis	PHG1	181762
Puccinia striiformis	PHG1	27350
Purpureocillium takamizusanense	PHG1	2060973
Saccharomyces cerevisiae	PHG1	4932
Sporisorium graminicola	PHG1	280036
Streptomyces sp. GMY02	PHG1	1333528
Thalassiosira pseudonana	PHG1	35128
Thermothelomyces thermophilus	PHG1	78579
Toxoplasma gondii	PHG1	5811
Trypanosoma brucei	PHG1	5691
Ustilaginoidea virens	PHG1	1159556
Yarrowia lipolytica	PHG1	4952
Aeromonas caviae	PHG2	648
Aspergillus chevalieri	PHG2	182096
Aspergillus oryzae	PHG2	5062
Aspergillus puulaauensis	PHG2	1220207
Babesia bigemina	PHG2	5866
Bacteroides salyersiae	PHG2	291644
Bacteroides sp. KGMB07931	PHG2	2792859
Bifidobacterium bifidum	PHG2	1681
Bifidobacterium imperatoris	PHG2	2020965
Bifidobacterium longum	PHG2	216816
Bifidobacterium pseudocatenulatum	PHG2	28026
Burkholderia pseudomallei	PHG2	28450
Butyricimonas virosa	PHG2	544645
Candida albicans	PHG2	5476
Chryseobacterium sp. 3008163	PHG2	2478663
Clostridium botulinum	PHG2	1491
CrAss-like virus sp.	PHG2	2831617
crAssphage cr50_1	PHG2	2772059
Enterococcus faecalis	PHG2	1351
Erysipelotrichaceae bacterium 66202529	PHG2	2676062
Fannyhessea vaginae	PHG2	82135
Fusarium fujikuroi	PHG2	5127
Fusarium oxysporum	PHG2	5507
Fusarium pseudograminearum	PHG2	101028
Fusarium verticillioides	PHG2	117187
Fusobacterium ulcerans	PHG2	861
Gardnerella vaginalis	PHG2	2702
Giardia intestinalis	PHG2	5741
Kinneretia sp. DAIF2	PHG2	2714952
Klebsiella pneumoniae	PHG2	573
Klebsiella quasipneumoniae	PHG2	1463165
Klebsiella variicola	PHG2	244366
Lacticaseibacillus rhamnosus	PHG2	47715
Leishmania mexicana	PHG2	5665
Limosilactobacillus mucosae	PHG2	97478
Lysinibacillus fusiformis	PHG2	28031
Methanobrevibacter smithii	PHG2	2173
Methylomagnum ishizawai	PHG2	1760988
Mobiluncus curtisii	PHG2	2051
Naumovozyma dairenensis	PHG2	27289
Parabacteroides merdae	PHG2	46503
Paracoccus mutanolyticus	PHG2	1499308
Plasmodium sp. gorilla clade G2	PHG2	880535
Prevotella denticola	PHG2	28129
Prevotella histicola	PHG2	470565
Prevotella melaninogenica	PHG2	28132
Pseudomonas fluorescens	PHG2	294
Pseudomonas frederiksbergensis	PHG2	104087
Pyricularia grisea	PHG2	148305
Pyricularia pennisetigena	PHG2	1578925
Schizosaccharomyces pombe	PHG2	4896
Shigella dysenteriae	PHG2	622
Staphylococcus capitis	PHG2	29388
Stenotrophomonas maltophilia	PHG2	40324
Streptomyces armeniacus	PHG2	83291
Streptomyces sp. ICC4	PHG2	2099584
Sutterella wadsworthensis	PHG2	40545
Talaromyces rugulosus	PHG2	121627
Tannerella forsythia	PHG2	28112
Tenacibaculum sp. SZ-18	PHG2	754423
Thermothielavioides terrestris	PHG2	2587410
Torulaspora delbrueckii	PHG2	4950
Treponema denticola	PHG2	158
Turicimonas muris	PHG2	1796652
Vaginimicrobium propionicum	PHG2	1871034
Xanthobacter autotrophicus	PHG2	280
Zymoseptoria tritici	PHG2	1047171
Abiotrophia defectiva	PHG3	46125
Actinomyces faecalis	PHG3	2722820
Actinomyces graevenitzii	PHG3	55565
Actinomyces howellii	PHG3	52771
Actinomyces marmotae	PHG3	2737173
Actinomyces naeslundii	PHG3	1655
Actinomyces oris	PHG3	544580
Actinomyces pacaensis	PHG3	1852377
Actinomyces procaprae	PHG3	2560010
Actinomyces qiguomingii	PHG3	2057800
Actinomyces respiraculi	PHG3	2744574
Actinomyces slackii	PHG3	52774
Actinomyces sp. 432	PHG3	2057798
Actinomyces sp. Chiba101	PHG3	1851395
Actinomyces sp. HMT897	PHG3	2789424
Actinomyces sp. MAS-1	PHG3	2755559
Actinomyces sp. oral taxon 171	PHG3	706438
Actinomyces sp. oral taxon 414	PHG3	712122
Actinomyces sp. oral taxon 897	PHG3	2081702
Actinomyces sp. Z16	PHG3	2079536
Actinomyces trachealis	PHG3	2763540
Actinomyces viscosus	PHG3	1656
Actinomyces weissii	PHG3	675090
Anaerostipes hadrus	PHG3	649756
Arachnia propionica	PHG3	1750
Arachnia rubra	PHG3	1547448
Berryella intestinalis	PHG3	1531429
Blautia massiliensis	PHG3	1737424
Blautia sp. SC05B48	PHG3	2479767
Bulleidia sp. zg-1006	PHG3	2806552
Clostridium sp. AWRP	PHG3	2212991
Collinsella sp. zg1085	PHG3	2844380
Corynebacterium diphtheriae	PHG3	1717
Corynebacterium glutamicum	PHG3	1718
Corynebacterium jeikeium	PHG3	38289
Denitrobacterium detoxificans	PHG3	79604
Desulfosporosinus meridiei	PHG3	79209
Enterococcus cecorum	PHG3	44008
Erysipelatoclostridium ramosum	PHG3	1547
Ezakiella coagulans	PHG3	46507
Ezakiella massiliensis	PHG3	1852374
Fenollaria massiliensis	PHG3	938288
Filifactor alocis	PHG3	143361
Finegoldia magna	PHG3	1260
Furfurilactobacillus rossiae	PHG3	231049
Fusobacterium necrophorum	PHG3	859
Fusobacterium nucleatum	PHG3	851
Gemella morbillorum	PHG3	29391
Gemella sanguinis	PHG3	84135
Granulicatella adiacens	PHG3	46124
Granulicatella elegans	PHG3	137732
Helcococcus kunzii	PHG3	40091
Lactobacillus helveticus	PHG3	1587
Lactococcus piscium	PHG3	1364
Lancefieldella parvula	PHG3	1382
Latilactobacillus curvatus	PHG3	28038
Latilactobacillus sakei	PHG3	1599
Lawsonella clevelandensis	PHG3	1528099
Leuconostoc carnosum	PHG3	1252
Leuconostoc citreum	PHG3	33964
Leuconostoc mesenteroides	PHG3	1245
Leuconostoc pseudomesenteroides	PHG3	33968
Micrococcus luteus	PHG3	1270
Olsenella sp. oral taxon 807	PHG3	712411
Olsenella uli	PHG3	133926
Parvimonas micra	PHG3	33033
Pauljensenia hongkongensis	PHG3	178339
Pediococcus acidilactici	PHG3	1254
Peptacetobacter hiranonis	PHG3	89152
Priestia aryabhattai	PHG3	412384
Propionibacterium acidifaciens	PHG3	556499
Romboutsia ilealis	PHG3	1115758
Rothia aeria	PHG3	172042
Ruminococcus sp. SR1/5	PHG3	657323
Sarcina sp. JB2	PHG3	2726954
Schaalia cardiffensis	PHG3	181487
Schaalia meyeri	PHG3	52773
Schaalia odontolytica	PHG3	1660
Schaalia sp. 19OD2882	PHG3	2794089
Schaalia sp. ZJ405	PHG3	2709403
Schaalia turicensis	PHG3	131111
Slackia heliotrinireducens	PHG3	84110
Streptococcus australis	PHG3	113107
Streptococcus cristatus	PHG3	45634
Streptococcus equi	PHG3	1336
Streptococcus ilei	PHG3	1156431
Streptococcus infantis	PHG3	68892
Streptococcus koreensis	PHG3	2382163
Streptococcus pneumoniae	PHG3	1313
Streptococcus porcinus	PHG3	1340
Streptococcus pseudoporcinus	PHG3	361101
Streptococcus pyogenes	PHG3	1314
Streptococcus rubneri	PHG3	1234680
Streptococcus sanguinis	PHG3	1305
Streptococcus sp. A12	PHG3	1759399
Streptococcus sp. NSJ-72	PHG3	2763068
Streptococcus sp. oral taxon 061	PHG3	712623
Streptococcus sp. oral taxon 431	PHG3	712633
Streptococcus thermophilus	PHG3	1308
Tepiditoga spiralis	PHG3	2108365
Terribacillus aidingensis	PHG3	586416
Tetrapisispora phaffii	PHG3	113608
Turicibacter sp. H121	PHG3	1712675
uncultured human fecal virus	PHG3	239364
Weissella confusa	PHG3	1583
[Bacillus] caldolyticus	PHG4	1394
Acidaminococcus intestini	PHG4	187327
Anoxybacillus flavithermus	PHG4	33934
Anoxybacillus gonensis	PHG4	198467
Anoxybacillus kamchatkensis	PHG4	196180
Bacillus amyloliquefaciens	PHG4	1390
Bacillus anthracis	PHG4	1392
Bacillus atrophaeus	PHG4	1452
Bacillus cereus	PHG4	1396
Bacillus licheniformis	PHG4	1402
Bacillus subtilis	PHG4	1423
Bacillus thuringiensis	PHG4	1428
Bacillus vallismortis	PHG4	72361
Bacillus velezensis	PHG4	492670
Bifidobacterium adolescentis	PHG4	1680
Bradyrhizobium diazoefficiens	PHG4	1355477
Bradyrhizobium erythrophlei	PHG4	1437360
Bradyrhizobium sp. BTAi1	PHG4	288000
Candida tropicalis	PHG4	5482
Corynebacterium aurimucosum	PHG4	169292
Corynebacterium matruchotii	PHG4	43768
Corynebacterium minutissimum	PHG4	38301
Corynebacterium simulans	PHG4	146827
Corynebacterium singulare	PHG4	161899
Cryptococcus neoformans	PHG4	5207
Curtobacterium flaccumfaciens	PHG4	2035
Cutibacterium acnes	PHG4	1747
Cutibacterium avidum	PHG4	33010
Enterocloster bolteae	PHG4	208479
Geobacillus genomosp. 3	PHG4	1921421
Geobacillus kaustophilus	PHG4	1462
Geobacillus sp. C56-T3	PHG4	691437
Geobacillus sp. GHH01	PHG4	1233873
Geobacillus sp. JS12	PHG4	1813182
Geobacillus sp. Y412MC52	PHG4	550542
Geobacillus stearothermophilus	PHG4	1422
Geobacillus subterraneus	PHG4	129338
Geobacillus thermocatenulatus	PHG4	33938
Geobacillus thermoleovorans	PHG4	33941
Geobacillus zalihae	PHG4	213419
Lactobacillus acidophilus	PHG4	1579
Lactobacillus johnsonii	PHG4	33959
Limosilactobacillus fermentum	PHG4	1613
Limosilactobacillus gastricus	PHG4	227942
Limosilactobacillus panis	PHG4	47493
Limosilactobacillus reuteri	PHG4	1598
Listeria innocua	PHG4	1642
Listeria ivanovii	PHG4	1638
Listeria monocytogenes	PHG4	1639
Listeria welshimeri	PHG4	1643
Malassezia restricta	PHG4	76775
Microbacterium sp. Nx66	PHG4	2766784
Mycobacterium gordonae	PHG4	1778
Mycobacterium paragordonae	PHG4	1389713
Parageobacillus caldoxylosilyticus	PHG4	81408
Pediococcus claussenii	PHG4	187452
Prevotella copri	PHG4	165179
Pseudomonas stutzeri	PHG4	316
Ralstonia insidiosa	PHG4	190721
Ralstonia mannitolilytica	PHG4	105219
Ralstonia pickettii	PHG4	329
Ralstonia solanacearum	PHG4	305
Ralstonia sp. 56D2	PHG4	2842456
Sphingomonas melonis	PHG4	152682
Sphingomonas sp. NIC1	PHG4	1961362
Staphylococcus aureus	PHG4	1280
Staphylococcus condimenti	PHG4	70255
Staphylococcus felis	PHG4	46127
Staphylococcus haemolyticus	PHG4	1283
Staphylococcus hominis	PHG4	1290
Staphylococcus pasteuri	PHG4	45972
Staphylococcus roterodami	PHG4	2699836
Staphylococcus saprophyticus	PHG4	29385
Staphylococcus simiae	PHG4	308354
[Clostridium] innocuum	PHG5	1522
[Ruminococcus] gnavus	PHG5	33038
Anaerostipes caccae	PHG5	105841
Bacillus mycoides	PHG5	1405
Bifidobacterium animalis	PHG5	28025
Bifidobacterium catenulatum	PHG5	1686
Bifidobacterium dentium	PHG5	1689
Blautia producta	PHG5	33035
Blautia pseudococcoides	PHG5	1796616
Blautia sp. NBRC 113351	PHG5	2877527
Catenibacterium sp. co_0103	PHG5	2478954
Cellulosilyticum lentocellum	PHG5	29360
Christensenella minuta	PHG5	626937
Clostridia bacterium UC5.1-1D4	PHG5	1697784
Clostridiales bacterium CCNA10	PHG5	2109688
Clostridium sp. C1	PHG5	1155388
Clostridium sp. M62/1	PHG5	411486
Collinsella stercoris	PHG5	147206
Dysosmobacter sp. Marseille-Q4140	PHG5	2830675
Eggerthella guodeyinii	PHG5	2690837
Eggerthella lenta	PHG5	84112
Eggerthella sp. YY7918	PHG5	502558
Enterococcus avium	PHG5	33945
Enterococcus casseliflavus	PHG5	37734
Enterococcus durans	PHG5	53345
Enterococcus faecium	PHG5	1352
Enterococcus gallinarum	PHG5	1353
Enterococcus hirae	PHG5	1354
Enterococcus mundtii	PHG5	53346
Erysipelotrichaceae bacterium I46	PHG5	1834207
Eubacterium sp. c-25	PHG5	2841037
Eubacterium sp. NSJ-61	PHG5	2764325
Gordonibacter pamelaeae	PHG5	471189
Gordonibacter urolithinfaciens	PHG5	1335613
Lachnoclostridium phocaeense	PHG5	1871021
Lachnoclostridium sp. YL32	PHG5	1834196
Lacticaseibacillus paracasei	PHG5	1597
Lactobacillus gasseri	PHG5	1596
Lactobacillus paragasseri	PHG5	2107999
Massilistercora timonensis	PHG5	2086584
Paenibacillus peoriae	PHG5	59893
Parafannyhessea umbonata	PHG5	604330
Qiania dongpingensis	PHG5	2763669
Roseburia intestinalis	PHG5	166486
Ruthenibacterium lactatiformans	PHG5	1550024
Sellimonas intestinalis	PHG5	1653434
Streptococcus agalactiae	PHG5	1311
Streptococcus equinus	PHG5	1335
Streptococcus gallolyticus	PHG5	315405
Streptococcus infantarius	PHG5	102684
Streptococcus lutetiensis	PHG5	150055
Streptococcus parasuis	PHG5	1501662
Streptococcus pasteurianus	PHG5	197614
Streptococcus sp. CNU 77-61	PHG5	2684658
Streptococcus sp. CNU G2	PHG5	2686210
Streptococcus sp. CNU G3	PHG5	2698804
[Clostridium] hylemonae	PHG6	89153
[Clostridium] scindens	PHG6	29347
[Ruminococcus] torques	PHG6	33039
Actinomyces radicidentis	PHG6	111015
Actinomyces sp. HMT 175	PHG6	2789425
Adlercreutzia equolifaciens	PHG6	446660
Adlercreutzia hattorii	PHG6	2707299
Aminipila butyrica	PHG6	433296
Aminipila terrae	PHG6	2697030
Anaerobutyricum hallii	PHG6	39488
Anaerostipes rhamnosivorans	PHG6	1229621
Bifidobacterium breve	PHG6	1685
Blautia obeum	PHG6	40520
Blautia wexlerae	PHG6	418240
Brevibacillus laterosporus	PHG6	1465
Cellulosilyticum sp. WCF-2	PHG6	2497860
Clostridium baratii	PHG6	1561
Clostridium beijerinckii	PHG6	1520
Clostridium butyricum	PHG6	1492
Clostridium cadaveris	PHG6	1529
Clostridium neonatale	PHG6	137838
Clostridium novyi	PHG6	1542
Clostridium perfringens	PHG6	1502
Clostridium saccharoperbutylacetonicum	PHG6	36745
Clostridium sporogenes	PHG6	1509
Collinsella aerofaciens	PHG6	74426
Companilactobacillus paralimentarius	PHG6	83526
Conexibacter sp. SYSU D00693	PHG6	2812560
Coprococcus comes	PHG6	410072
Coprococcus eutactus	PHG6	33043
Dorea longicatena	PHG6	88431
Emergencia timonensis	PHG6	1776384
Faecalibacillus intestinalis	PHG6	1982626
Faecalicatena sp. Marseille-Q4148	PHG6	2823316
Lactobacillus crispatus	PHG6	47770
Lactococcus carnosus	PHG6	2749961
Lactococcus cremoris	PHG6	1359
Lactococcus lactis	PHG6	1358
Lactococcus raffinolactis	PHG6	1366
Leuconostoc gelidum	PHG6	1244
Levilactobacillus brevis	PHG6	1580
Ligilactobacillus salivarius	PHG6	1624
Megasphaera massiliensis	PHG6	1232428
Olsenella timonensis	PHG6	1805478
Paeniclostridium sordellii	PHG6	1505
Paraclostridium bifermentans	PHG6	1490
Parascardovia denticolens	PHG6	78258
Parolsenella catena	PHG6	2003188
Priestia megaterium	PHG6	1404
Raoultibacter timonensis	PHG6	1907662
Roseburia hominis	PHG6	301301
Ruminococcus bovis	PHG6	2564099
Ruminococcus sp. FMBCY1	PHG6	2831966
Scardovia inopinata	PHG6	78259
Staphylococcus epidermidis	PHG6	1282
Streptococcus anginosus	PHG6	1328
Streptococcus canis	PHG6	1329
Streptococcus constellatus	PHG6	76860
Streptococcus dysgalactiae	PHG6	1334
Streptococcus lactarius	PHG6	684066
Streptococcus milleri	PHG6	33040
Streptococcus mutans	PHG6	1309
Streptococcus oralis	PHG6	1303
Streptococcus parasanguinis	PHG6	1318
Streptococcus periodonticum	PHG6	2490633
Streptococcus pluranimalium	PHG6	82348
Streptococcus salivarius	PHG6	1304
Streptococcus sobrinus	PHG6	1310
Streptococcus sp. 1643	PHG6	2576376
Streptococcus sp. FDAARGOS_192	PHG6	1839799
Streptococcus sp. HSISM1	PHG6	1316408
Streptococcus sp. HSISS1	PHG6	1316410
Streptococcus sp. HSISS2	PHG6	1316411
Streptococcus sp. HSISS3	PHG6	1316412
Streptococcus sp. LPB0220	PHG6	2610896
Streptococcus sp. NCTC 11567	PHG6	2583584
Streptococcus sp. NPS 308	PHG6	1902136
Streptococcus sp. oral taxon 064	PHG6	712624
Streptococcus suis	PHG6	1307
Streptococcus urinalis	PHG6	149016
Streptococcus vestibularis	PHG6	1343
Terrisporobacter glycolicus	PHG6	36841
Terrisporobacter sp. MCA3	PHG6	2813371
Turicibacter sanguinis	PHG6	154288
Vallitalea guaymasensis	PHG6	1185412
Vallitalea pronyensis	PHG6	1348613
[Clostridium] symbiosum	PHG7	1512
[Eubacterium] rectale	PHG7	39491
[Eubacterium] siraeum	PHG7	39492
Acinetobacter baumannii	PHG7	470
Actinomyces sp. oral taxon 169	PHG7	712116
Amedibacterium intestinale	PHG7	2583452
Aminipila luticellarii	PHG7	2507160
Anaerocolumna cellulosilytica	PHG7	433286
Anaerocolumna chitinilytica	PHG7	1727145
Anaerocolumna sedimenticola	PHG7	2696063
Anaerotignum propionicum	PHG7	28446
Arabiibacter massiliensis	PHG7	1870985
Bacteriophage sp.	PHG7	38018
Blautia argi	PHG7	1912897
Blautia liquoris	PHG7	2779518
Brevibacillus brevis	PHG7	1393
butyrate-producing bacterium SS3/4	PHG7	245014
Butyrivibrio fibrisolvens	PHG7	831
Butyrivibrio hungatei	PHG7	185008
Butyrivibrio proteoclasticus	PHG7	43305
Clostridioides difficile	PHG7	1496
Clostridium pasteurianum	PHG7	1501
Clostridium sp. DL-VIII	PHG7	641107
Clostridium sp. SY8519	PHG7	1042156
Coprococcus sp. ART55/1	PHG7	751585
Enterocloster clostridioformis	PHG7	1531
Eubacterium sp. MSJ-33	PHG7	2841528
Faecalitalea cylindroides	PHG7	39483
Flintibacter sp. KGMB00164	PHG7	2610895
Herbinix luporum	PHG7	1679721
Lachnoanaerobaculum umeaense	PHG7	617123
Lachnoclostridium phytofermentans	PHG7	66219
Lachnospira eligens	PHG7	39485
Lachnospiraceae bacterium	PHG7	1898203
Lachnospiraceae bacterium GAM79	PHG7	2109691
Lacrimispora saccharolytica	PHG7	84030
Lacrimispora sphenoides	PHG7	29370
Lawsonibacter asaccharolyticus	PHG7	2108523
Monoglobus pectinilyticus	PHG7	1981510
Nanosynbacter sp. HMT-352	PHG7	2899133
Novisyntrophococcus fermenticellae	PHG7	2068655
Oscillibacter sp. NSJ-62	PHG7	2763056
Oscillospiraceae bacterium	PHG7	2485925
Paenibacillus polymyxa	PHG7	1406
Paraprevotella xylaniphila	PHG7	454155
Parolsenella massiliensis	PHG7	1871022
Peptoclostridium acidaminophilum	PHG7	1731
Pseudobutyrivibrio xylanivorans	PHG7	185007
Pseudomonas putida	PHG7	303
Pusillibacter faecalis	PHG7	2714358
Romboutsia hominis	PHG7	1507512
Romboutsia sp. CE17	PHG7	2724150
Roseburia sp. NSJ-69	PHG7	2763062
Ruminococcus albus	PHG7	1264
Ruminococcus champanellensis	PHG7	1161942
Simiaoa sunii	PHG7	2763672
Solibaculum mannosilyticum	PHG7	2780922
Streptococcus acidominimus	PHG7	1326
Streptococcus gordonii	PHG7	1302
Thermoclostridium stercorarium	PHG7	1510
uncultured Blautia sp.	PHG7	765821
uncultured Clostridia bacterium	PHG7	244328
Vescimonas fastidiosa	PHG7	2714353
Wansuia hejianensis	PHG7	2763667
Wujia chipingensis	PHG7	2763670
Acutalibacter muris	PHG8	1796620
Akkermansia muciniphila	PHG8	239935
Alistipes communis	PHG8	2585118
Alistipes dispar	PHG8	2585119
Alistipes finegoldii	PHG8	214856
Alistipes indistinctus	PHG8	626932
Alistipes megaguti	PHG8	2364787
Alistipes onderdonkii	PHG8	328813
Alistipes senegalensis	PHG8	1288121
Alistipes shahii	PHG8	328814
Alistipes sp. dk3624	PHG8	2662363
Anaerotruncus colihominis	PHG8	169435
Bacteroides caccae	PHG8	47678
Bacteroides caecimuris	PHG8	1796613
Bacteroides cellulosilyticus	PHG8	246787
Bacteroides eggerthii	PHG8	28111
Bacteroides faecis	PHG8	674529
Bacteroides fragilis	PHG8	817
Bacteroides intestinalis	PHG8	329854
Bacteroides luhongzhouii	PHG8	2650158
Bacteroides nordii	PHG8	291645
Bacteroides ovatus	PHG8	28116
Bacteroides sp. A1C1	PHG8	2528203
Bacteroides sp. CACC 737	PHG8	2755405
Bacteroides sp. CBA7301	PHG8	2715212
Bacteroides sp. HF-162	PHG8	2785531
Bacteroides sp. KGMB10229	PHG8	2884447
Bacteroides sp. M10	PHG8	2763022
Bacteroides thetaiotaomicron	PHG8	818
Bacteroides uniformis	PHG8	820
Bacteroides xylanisolvens	PHG8	371601
Bacteroides zhangwenhongii	PHG8	2650157
Barnesiella viscericola	PHG8	397865
Bifidobacterium pullorum	PHG8	78448
Butyricimonas faecalis	PHG8	2093856
Campylobacter jejuni	PHG8	197
Cedecea neteri	PHG8	158822
Christensenella sp. Marseille-P3954	PHG8	2086585
Citrobacter freundii	PHG8	546
Clostridiaceae bacterium Marseille-Q4149	PHG8	2830659
Coprobacter secundus	PHG8	1501392
Coprococcus catus	PHG8	116085
crAssphage cr109_1	PHG8	2772083
crAssphage cr113_1	PHG8	2772087
Cupriavidus malaysiensis	PHG8	367825
Desulfovibrio piger	PHG8	901
Dysosmobacter welbionis	PHG8	2093857
Enterobacter hormaechei	PHG8	158836
Escherichia albertii	PHG8	208962
Escherichia coli	PHG8	562
Escherichia fergusonii	PHG8	564
Escherichia marmotae	PHG8	1499973
Eubacterium callanderi	PHG8	53442
Eubacterium limosum	PHG8	1736
Eubacterium maltosivorans	PHG8	2041044
Faecalibacterium prausnitzii	PHG8	853
Faecalibacterium sp. HTFF	PHG8	2929491
Faecalibacterium sp. I2392	PHG8	2929490
Faecalibacterium sp. I3333	PHG8	2929492
Faecalibacterium sp. I3389	PHG8	2929493
Faecalibacterium sp. I4179	PHG8	2929494
Faecalibacterium sp. I4384	PHG8	2929495
Faecalibacterium sp. IP118	PHG8	2929488
Faecalibacterium sp. IP329	PHG8	2929489
Flavonifractor plautii	PHG8	292800
Hungatella hathewayi	PHG8	154046
Intestinimonas butyriciproducens	PHG8	1297617
Longicatena caecimuris	PHG8	1796635
Odoribacter splanchnicus	PHG8	28118
Parabacteroides distasonis	PHG8	823
Parabacteroides goldsteinii	PHG8	328812
Parabacteroides johnsonii	PHG8	387661
Parabacteroides sp. CT06	PHG8	2025876
Phascolarctobacterium faecium	PHG8	33025
Phocaeicola coprophilus	PHG8	387090
Phocaeicola dorei	PHG8	357276
Phocaeicola salanitronis	PHG8	376805
Phocaeicola vulgatus	PHG8	821
Prevotella intermedia	PHG8	28131
Propionibacterium freudenreichii	PHG8	1744
Pseudomonas aeruginosa	PHG8	287
Rothia dentocariosa	PHG8	2047
Rothia mucilaginosa	PHG8	43675
Salmonella enterica	PHG8	28901
Serratia marcescens	PHG8	615
Shigella boydii	PHG8	621
Shigella flexneri	PHG8	623
Sutterella megalosphaeroides	PHG8	2494234
Vescimonas coprocola	PHG8	2714355
Bacteroides stercoris	PHG9	46506
Bifidobacterium angulatum	PHG9	1683
Bifidobacterium scardovii	PHG9	158787
Brevibacillus choshinensis	PHG9	54911
Corynebacterium accolens	PHG9	38284
Corynebacterium glucuronolyticum	PHG9	39791
Corynebacterium kefirresidentii	PHG9	1979527
Corynebacterium macginleyi	PHG9	38290
Corynebacterium segmentosum	PHG9	43990
Corynebacterium striatum	PHG9	43770
Corynebacterium tuberculostearicum	PHG9	38304
Dermabacter jinjuensis	PHG9	1667168
Dialister pneumosintes	PHG9	39950
Gardnerella piotii	PHG9	2792977
Gemella haemolysans	PHG9	1379
Lactiplantibacillus plantarum	PHG9	1590
Lactobacillus delbrueckii	PHG9	1584
Lactococcus garvieae	PHG9	1363
Limosilactobacillus oris	PHG9	1632
Limosilactobacillus vaginalis	PHG9	1633
Microlunatus sagamiharensis	PHG9	546874
Mogibacterium diversum	PHG9	114527
Mogibacterium pumilum	PHG9	86332
Murdochiella vaginalis	PHG9	1852373
Ndongobacter massiliensis	PHG9	1871025
Peptoniphilus harei	PHG9	54005
Streptococcus gwangjuense	PHG9	1433513
Streptococcus intermedius	PHG9	1338
Streptococcus mitis	PHG9	28037
Streptococcus pseudopneumoniae	PHG9	257758
Streptococcus sp. 116-D4	PHG9	2598453
Streptomyces sp. ICC1	PHG9	2099583
Veillonella atypica	PHG9	39777
Veillonella dispar	PHG9	39778
Veillonella nakazawae	PHG9	2682456
Veillonella parvula	PHG9	29466
Veillonella sp. S12025-13	PHG9	2682455

## Sheet: S7-4
Table S7-4. Correlation Cluster in Mucosa
Species	Cluster Group	NCBI taxonomy ID
Homo sapiens	PHG1	9606
Toxoplasma gondii	PHG1	5811
Trypanosoma brucei	PHG1	5691
Saccharomyces cerevisiae	PHG2	4932
Candida tropicalis	PHG2	5482
Candida dubliniensis	PHG2	42374
Pichia kudriavzevii	PHG2	4909
Botrytis cinerea	PHG2	40559
Fusarium poae	PHG2	36050
Fusarium graminearum	PHG2	5518
Fusarium venenatum	PHG2	56646
Fusarium oxysporum	PHG2	5507
Fusarium verticillioides	PHG2	117187
Fusarium fujikuroi	PHG2	5127
Fusarium musae	PHG2	1042133
Purpureocillium takamizusanense	PHG2	2060973
Drechmeria coniospora	PHG2	98403
Ustilaginoidea virens	PHG2	1159556
Pochonia chlamydosporia	PHG2	280754
Colletotrichum higginsianum	PHG2	80884
Thermothelomyces thermophilus	PHG2	78579
Neurospora crassa	PHG2	5141
Pyricularia grisea	PHG2	148305
Pyricularia pennisetigena	PHG2	1578925
Aspergillus oryzae	PHG2	5062
Aspergillus luchuensis	PHG2	1069201
Aspergillus puulaauensis	PHG2	1220207
Talaromyces rugulosus	PHG2	121627
Zymoseptoria tritici	PHG2	1047171
Schizosaccharomyces pombe	PHG2	4896
Psilocybe cubensis	PHG2	181762
Cryptococcus neoformans	PHG2	5207
Puccinia striiformis	PHG2	27350
Sporisorium graminicola	PHG2	280036
Ustilago maydis	PHG2	5270
Besnoitia besnoiti	PHG2	94643
Neospora caninum	PHG2	29176
Plasmodium malariae	PHG2	5858
Plasmodium vivax	PHG2	5855
Plasmodium cynomolgi	PHG2	5827
Plasmodium knowlesi	PHG2	5850
Plasmodium coatneyi	PHG2	208452
Plasmodium yoelii	PHG2	5861
Thalassiosira pseudonana	PHG2	35128
Phaeodactylum tricornutum	PHG2	2850
Leishmania infantum	PHG2	5671
Leishmania donovani	PHG2	5661
Leishmania major	PHG2	5664
Leishmania braziliensis	PHG2	5660
Leishmania panamensis	PHG2	5679
Dictyostelium discoideum	PHG2	44689
Bacillus dafuensis	PHG2	1742359
Nocardia gipuzkoensis	PHG2	2749991
Arthrobacter sp. KBS0702	PHG2	2578107
Streptomyces sp. GMY02	PHG2	1333528
Prochlorococcus marinus	PHG2	1219
Legionella pneumophila	PHG2	446
Legionella israelensis	PHG2	454
Legionella antarctica	PHG2	2708020
Pseudomonas frederiksbergensis	PHG2	104087
Venatorbacter cucullus	PHG2	2661630
Methylomagnum ishizawai	PHG2	1760988
Polynucleobacter sp. MG-Unter2-18	PHG2	2081052
Kinneretia sp. DAIF2	PHG2	2714952
Fluviibacter phosphoraccumulans	PHG2	1751046
Granulibacter bethesdensis	PHG2	364410
Bradyrhizobium erythrophlei	PHG2	1437360
Paracoccus mutanolyticus	PHG2	1499308
Flavobacterium johnsoniae	PHG2	986
Chryseobacterium sp. 3008163	PHG2	2478663
Methanosarcina mazei	PHG2	2209
Halosimplex litoreum	PHG2	1198301
Synechococcus phage S-CAM8	PHG2	754038
Tenacibaculum sp. SZ-18	PHG2	754423
Saccharolobus solfataricus	PHG2	2287
Saccharomyces eubayanus	PHG3	1080349
Saccharomyces paradoxus	PHG3	27291
Naumovozyma dairenensis	PHG3	27289
Kluyveromyces lactis	PHG3	28985
Eremothecium cymbalariae	PHG3	45285
Tetrapisispora blattae	PHG3	1071379
Tetrapisispora phaffii	PHG3	113608
[Candida] glabrata	PHG3	5478
Zygosaccharomyces rouxii	PHG3	4956
Zygotorulaspora mrakii	PHG3	42260
Kazachstania africana	PHG3	432096
Scheffersomyces stipitis	PHG3	4924
Brettanomyces bruxellensis	PHG3	5007
Saccharomycodes ludwigii	PHG3	36035
Parageobacillus toebii	PHG3	153151
Priestia megaterium	PHG3	1404
Streptococcus pneumoniae	PHG3	1313
Streptococcus suis	PHG3	1307
Enterococcus faecalis	PHG3	1351
Clostridium neonatale	PHG3	137838
Christensenella sp. Marseille-P3954	PHG3	2086585
Faecalitalea cylindroides	PHG3	39483
Burkholderia pseudomallei	PHG3	28450
Torulaspora delbrueckii	PHG3	4950
Kazachstania naganishii	PHG3	588726
Debaryomyces hansenii	PHG3	4959
Clostridium perfringens	PHG3	1502
Clostridium pasteurianum	PHG3	1501
Clostridiaceae bacterium Marseille-Q4149	PHG3	2830659
Bacillus subtilis	PHG3	1423
Streptococcus gordonii	PHG3	1302
Streptococcus lactarius	PHG3	684066
Amedibacterium intestinale	PHG3	2583452
Megasphaera massiliensis	PHG3	1232428
Bifidobacterium pseudocatenulatum	PHG3	28026
Bifidobacterium bifidum	PHG3	1681
Bifidobacterium catenulatum	PHG3	1686
Rothia mucilaginosa	PHG3	43675
Providencia rettgeri	PHG3	587
Vibrio parahaemolyticus	PHG3	670
Paenibacillus polymyxa	PHG3	1406
Listeria monocytogenes	PHG3	1639
Streptococcus lutetiensis	PHG3	150055
Streptococcus infantarius	PHG3	102684
Enterococcus mundtii	PHG3	53346
Enterococcus cecorum	PHG3	44008
Granulicatella elegans	PHG3	137732
Clostridium beijerinckii	PHG3	1520
Fusobacterium nucleatum	PHG3	851
Ruminiclostridium herbifermentans	PHG3	2488810
Clostridium septicum	PHG3	1504
Flintibacter sp. KGMB00164	PHG3	2610895
Peptacetobacter hiranonis	PHG3	89152
Christensenella minuta	PHG3	626937
Desulfitobacterium hafniense	PHG3	49338
Dehalobacter restrictus	PHG3	55583
Candidatus Desulforudis audaxviator	PHG3	471827
Streptococcus sp. 116-D4	PHG3	2598453
Streptococcus sp. HSISS1	PHG3	1316410
Streptococcus sp. DAT741	PHG3	1940319
Streptococcus sp. CNU 77-61	PHG3	2684658
Streptococcus constellatus	PHG3	76860
Streptococcus pyogenes	PHG3	1314
Streptococcus equi	PHG3	1336
Streptococcus dysgalactiae	PHG3	1334
Streptococcus infantis	PHG3	68892
Streptococcus equinus	PHG3	1335
Streptococcus cristatus	PHG3	45634
Streptococcus porcinus	PHG3	1340
Streptococcus acidominimus	PHG3	1326
Streptococcus pseudoporcinus	PHG3	361101
Streptococcus pluranimalium	PHG3	82348
Streptococcus canis	PHG3	1329
Streptococcus uberis	PHG3	1349
Streptococcus halotolerans	PHG3	1814128
Streptococcus ratti	PHG3	1341
Streptococcus respiraculi	PHG3	2021971
Streptococcus urinalis	PHG3	149016
Streptococcus parauberis	PHG3	1348
Streptococcus iniae	PHG3	1346
Streptococcus gallolyticus	PHG3	315405
Streptococcus himalayensis	PHG3	1888195
Streptococcus marmotae	PHG3	1825069
Streptococcus chenjunshii	PHG3	2173853
Streptococcus ferus	PHG3	1345
Streptococcus merionis	PHG3	400065
Streptococcus parasuis	PHG3	1501662
Streptococcus halichoeri	PHG3	254785
Streptococcus pasteurianus	PHG3	197614
Ligilactobacillus ruminis	PHG3	1623
Lactobacillus johnsonii	PHG3	33959
Lactobacillus amylovorus	PHG3	1604
Lactobacillus acidophilus	PHG3	1579
Limosilactobacillus mucosae	PHG3	97478
Latilactobacillus curvatus	PHG3	28038
Enterococcus saigonensis	PHG3	1805431
Enterococcus wangshanyuanii	PHG3	2005703
Enterococcus raffinosus	PHG3	71452
Enterococcus gilvus	PHG3	160453
Enterococcus rotai	PHG3	118060
Enterococcus durans	PHG3	53345
Enterococcus hirae	PHG3	1354
Tetragenococcus halophilus	PHG3	51669
Bacillus anthracis	PHG3	1392
Bacillus velezensis	PHG3	492670
Bacillus atrophaeus	PHG3	1452
Weizmannia coagulans	PHG3	1398
Parageobacillus thermoglucosidasius	PHG3	1426
Sediminibacillus sp. DP4-553-S	PHG3	2729421
Allobaculum mucolyticum	PHG3	2834459
Allobaculum sp. Allo2	PHG3	2853432
Erysipelothrix sp. HDW6C	PHG3	2714930
Tannockella kyphosi	PHG3	2899121
Bulleidia sp. zg-1006	PHG3	2806552
Intestinibaculum porci	PHG3	2487118
Faecalibaculum rodentium	PHG3	1702221
Parolsenella catena	PHG3	2003188
Bifidobacterium pullorum	PHG3	78448
Amycolatopsis sp. Hca4	PHG3	2742131
Massilia lutea	PHG3	321985
Chromobacterium sp. ATCC 53434	PHG3	2059672
Fusobacterium necrophorum	PHG3	859
Eremothecium gossypii	PHG3	33169
Methanobrevibacter millerae	PHG3	230361
Lachancea thermotolerans	PHG3	381046
Methanobrevibacter smithii	PHG3	2173
Streptococcus sp. CNU G3	PHG3	2698804
Streptococcus sp. CNU G2	PHG3	2686210
Torulaspora globosa	PHG3	48254
Eremothecium sinecaudum	PHG3	45286
Naumovozyma castellii	PHG4	27288
Kluyveromyces marxianus	PHG4	4911
Candida orthopsilosis	PHG4	273371
Yarrowia lipolytica	PHG4	4952
Sugiyamaella lignohabitans	PHG4	796027
Fusarium pseudograminearum	PHG4	101028
Aspergillus chevalieri	PHG4	182096
Bacillus cereus	PHG4	1396
Bacillus thuringiensis	PHG4	1428
Amphibacillus xylanus	PHG4	1449
Prevotella copri	PHG4	165179
Prevotella dentalis	PHG4	52227
Prevotella multiformis	PHG4	282402
Prevotella denticola	PHG4	28129
Candida albicans	PHG5	5476
Pyricularia oryzae	PHG5	318829
Babesia bigemina	PHG5	5866
Leishmania mexicana	PHG5	5665
Giardia intestinalis	PHG5	5741
Staphylococcus capitis	PHG5	29388
Bacillus mycoides	PHG5	1405
Anoxybacillus kamchatkensis	PHG5	196180
Lysinibacillus fusiformis	PHG5	28031
Clostridium botulinum	PHG5	1491
Eubacterium callanderi	PHG5	53442
Eubacterium limosum	PHG5	1736
Erysipelotrichaceae bacterium 66202529	PHG5	2676062
Lawsonella clevelandensis	PHG5	1528099
Streptomyces sp. ICC1	PHG5	2099583
Bifidobacterium longum	PHG5	216816
Klebsiella quasipneumoniae	PHG5	1463165
Klebsiella pneumoniae	PHG5	573
Pseudomonas fluorescens	PHG5	294
Pseudomonas putida	PHG5	303
Ralstonia solanacearum	PHG5	305
Ralstonia insidiosa	PHG5	190721
Ralstonia pickettii	PHG5	329
Methylorubrum extorquens	PHG5	408
Sphingomonas melonis	PHG5	152682
Bacteroides thetaiotaomicron	PHG5	818
Bacteroides xylanisolvens	PHG5	371601
Bacteroides caccae	PHG5	47678
Phocaeicola dorei	PHG5	357276
Parabacteroides merdae	PHG5	46503
Odoribacter splanchnicus	PHG5	28118
Treponema denticola	PHG5	158
Geobacillus sp. JS12	PHG5	1813182
Geobacillus zalihae	PHG5	213419
Geobacillus stearothermophilus	PHG5	1422
Anoxybacillus gonensis	PHG5	198467
Anoxybacillus flavithermus	PHG5	33934
Streptococcus intermedius	PHG5	1338
Lactococcus lactis	PHG5	1358
Lactococcus cremoris	PHG5	1359
Lactococcus garvieae	PHG5	1363
Lactiplantibacillus plantarum	PHG5	1590
Lacticaseibacillus rhamnosus	PHG5	47715
Granulicatella adiacens	PHG5	46124
Turicibacter sp. H121	PHG5	1712675
Corynebacterium matruchotii	PHG5	43768
Streptomyces armeniacus	PHG5	83291
Cutibacterium acnes	PHG5	1747
Nostoc sp. CENA543	PHG5	1869241
Bacteroides salyersiae	PHG5	291644
Parabacteroides goldsteinii	PHG5	328812
Butyricimonas virosa	PHG5	544645
Prevotella melaninogenica	PHG5	28132
Klebsiella variicola	PHG5	244366
Serratia marcescens	PHG5	615
Sphingomonas sp. NIC1	PHG5	1961362
Geobacillus sp. Y412MC52	PHG5	550542
Parageobacillus caldoxylosilyticus	PHG5	81408
Mycobacterium paragordonae	PHG5	1389713
Ralstonia sp. 56D2	PHG5	2842456
Ralstonia mannitolilytica	PHG5	105219
Cupriavidus malaysiensis	PHG5	367825
Lactobacillus sp. 3B(2020)	PHG5	2695882
Limosilactobacillus gastricus	PHG5	227942
Geobacillus subterraneus	PHG5	129338
Geobacillus thermocatenulatus	PHG5	33938
Geobacillus genomosp. 3	PHG5	1921421
Anoxybacillus amylolyticus	PHG5	294699
Gemella haemolysans	PHG5	1379
Murdochiella vaginalis	PHG5	1852373
Helcococcus kunzii	PHG5	40091
Finegoldia magna	PHG5	1260
Ezakiella coagulans	PHG5	46507
Ezakiella massiliensis	PHG5	1852374
Collinsella sp. zg1085	PHG5	2844380
Mobiluncus curtisii	PHG5	2051
Curtobacterium flaccumfaciens	PHG5	2035
Bifidobacterium imperatoris	PHG5	2020965
Corynebacterium jeikeium	PHG5	38289
Corynebacterium glucuronolyticum	PHG5	39791
Corynebacterium diphtheriae	PHG5	1717
Mycobacterium gordonae	PHG5	1778
Thermus brockianus	PHG5	56956
Bacteroides sp. KGMB07931	PHG5	2792859
Phocaeicola coprophilus	PHG5	387090
Citrobacter portucalensis	PHG5	1639133
Sphingomonas paucimobilis	PHG5	13689
Sutterella wadsworthensis	PHG5	40545
Fusobacterium ulcerans	PHG5	861
Geobacillus sp. GHH01	PHG5	1233873
Geobacillus sp. C56-T3	PHG5	691437
Geobacillus thermoleovorans	PHG5	33941
Geobacillus kaustophilus	PHG5	1462
Acinetobacter junii	PHG5	40215
Xanthobacter autotrophicus	PHG5	280
Vaginimicrobium propionicum	PHG5	1871034
Thermothielavioides terrestris	PHG6	2587410
Plasmodium sp. gorilla clade G2	PHG6	880535
Gemella morbillorum	PHG6	29391
Streptococcus sp. A12	PHG6	1759399
Streptococcus australis	PHG6	113107
Streptococcus ilei	PHG6	1156431
Streptococcus koreensis	PHG6	2382163
Lactococcus piscium	PHG6	1364
Latilactobacillus sakei	PHG6	1599
Leuconostoc carnosum	PHG6	1252
Lactobacillus helveticus	PHG6	1587
Pediococcus acidilactici	PHG6	1254
Abiotrophia defectiva	PHG6	46125
Anaerostipes hadrus	PHG6	649756
Romboutsia sp. CE17	PHG6	2724150
Parvimonas micra	PHG6	33033
Actinomyces graevenitzii	PHG6	55565
Actinomyces naeslundii	PHG6	1655
Actinomyces sp. oral taxon 414	PHG6	712122
Actinomyces pacaensis	PHG6	1852377
Schaalia cardiffensis	PHG6	181487
Pauljensenia hongkongensis	PHG6	178339
Arachnia propionica	PHG6	1750
Escherichia coli	PHG6	562
Enterobacter asburiae	PHG6	61645
Cedecea neteri	PHG6	158822
Salmonella enterica	PHG6	28901
Lelliottia amnigena	PHG6	61646
Acinetobacter baumannii	PHG6	470
Tepiditoga spiralis	PHG6	2108365
Actinomyces sp. 432	PHG6	2057798
Actinomyces viscosus	PHG6	1656
Olsenella sp. oral taxon 807	PHG6	712411
Escherichia albertii	PHG6	208962
Escherichia fergusonii	PHG6	564
Escherichia marmotae	PHG6	1499973
Enterobacter hormaechei	PHG6	158836
Cronobacter sakazakii	PHG6	28141
Klebsiella oxytoca	PHG6	571
Citrobacter rodentium	PHG6	67825
Citrobacter freundii	PHG6	546
Citrobacter tructae	PHG6	2562449
Enterobacter ludwigii	PHG6	299767
Streptococcus rubneri	PHG6	1234680
Leuconostoc citreum	PHG6	33964
Furfurilactobacillus rossiae	PHG6	231049
Gemella sanguinis	PHG6	84135
Actinomyces sp. MAS-1	PHG6	2755559
Actinomyces sp. Chiba101	PHG6	1851395
Actinomyces sp. Z16	PHG6	2079536
Actinomyces sp. oral taxon 897	PHG6	2081702
Actinomyces sp. HMT897	PHG6	2789424
Actinomyces howellii	PHG6	52771
Actinomyces respiraculi	PHG6	2744574
Actinomyces slackii	PHG6	52774
Actinomyces procaprae	PHG6	2560010
Actinomyces faecalis	PHG6	2722820
Schaalia meyeri	PHG6	52773
Schaalia sp. 19OD2882	PHG6	2794089
Arachnia rubra	PHG6	1547448
Propionibacterium acidifaciens	PHG6	556499
Tannerella forsythia	PHG6	28112
Escherichia sp. E4742	PHG6	2044467
Citrobacter werkmanii	PHG6	67827
Citrobacter sp. R56	PHG6	1573676
Citrobacter sp. RHB25-C09	PHG6	2742624
Citrobacter farmeri	PHG6	67824
Citrobacter amalonaticus	PHG6	35703
Citrobacter koseri	PHG6	545
Klebsiella aerogenes	PHG6	548
Klebsiella michiganensis	PHG6	1134687
Klebsiella huaxiensis	PHG6	2153354
Klebsiella quasivariicola	PHG6	2026240
Raoultella ornithinolytica	PHG6	54291
Enterobacter cloacae	PHG6	550
Enterobacter roggenkampii	PHG6	1812935
Enterobacter sp. SA187	PHG6	1914861
Enterobacter sp. JUb54	PHG6	2724468
Shigella flexneri	PHG6	623
Shigella boydii	PHG6	621
Shigella dysenteriae	PHG6	622
Shigella sonnei	PHG6	624
Salmonella bongori	PHG6	54736
Kosakonia sacchari	PHG6	1158459
Kosakonia arachidis	PHG6	551989
Kosakonia cowanii	PHG6	208223
Leclercia adecarboxylata	PHG6	83655
Kluyvera intermedia	PHG6	61648
[Enterobacter] lignolyticus	PHG6	1334193
Jejubacter calystegiae	PHG6	2579935
Pseudocitrobacter sp. G163CM	PHG6	2891570
Yokenella regensburgei	PHG6	158877
Atlantibacter hermannii	PHG6	565
Scandinavium goeteborgense	PHG6	1851514
Staphylococcus aureus	PHG7	1280
Staphylococcus condimenti	PHG7	70255
Priestia aryabhattai	PHG7	412384
Streptococcus thermophilus	PHG7	1308
Streptococcus salivarius	PHG7	1304
Streptococcus parasanguinis	PHG7	1318
Enterococcus faecium	PHG7	1352
Blautia massiliensis	PHG7	1737424
Blautia sp. SC05B48	PHG7	2479767
Blautia sp. NBRC 113351	PHG7	2877527
Blautia obeum	PHG7	40520
[Ruminococcus] torques	PHG7	33039
[Ruminococcus] gnavus	PHG7	33038
Anaerobutyricum hallii	PHG7	39488
Coprococcus comes	PHG7	410072
[Clostridium] scindens	PHG7	29347
Dorea longicatena	PHG7	88431
Wansuia hejianensis	PHG7	2763667
Ruminococcus sp. SR1/5	PHG7	657323
Clostridium sp. AWRP	PHG7	2212991
Eubacterium sp. c-25	PHG7	2841037
Mogibacterium diversum	PHG7	114527
Clostridia bacterium UC5.1-1D4	PHG7	1697784
Erysipelatoclostridium ramosum	PHG7	1547
[Clostridium] innocuum	PHG7	1522
Actinomyces oris	PHG7	544580
Schaalia odontolytica	PHG7	1660
Eggerthella lenta	PHG7	84112
Adlercreutzia hattorii	PHG7	2707299
Adlercreutzia equolifaciens	PHG7	446660
Lancefieldella parvula	PHG7	1382
Anaerostipes caccae	PHG7	105841
Lachnoclostridium phocaeense	PHG7	1871021
Sellimonas intestinalis	PHG7	1653434
Dysosmobacter sp. Marseille-Q4140	PHG7	2830675
Clostridium sp. C1	PHG7	1155388
Paraclostridium bifermentans	PHG7	1490
Eubacterium sp. NSJ-61	PHG7	2764325
Aminipila butyrica	PHG7	433296
Massilistercora timonensis	PHG7	2086584
Romboutsia ilealis	PHG7	1115758
Staphylococcus epidermidis	PHG7	1282
Brevibacillus brevis	PHG7	1393
Streptococcus vestibularis	PHG7	1343
Streptococcus sp. HSISM1	PHG7	1316408
Streptococcus sp. LPB0220	PHG7	2610896
Streptococcus sp. HSISS3	PHG7	1316412
Streptococcus sp. HSISS2	PHG7	1316411
Streptococcus anginosus	PHG7	1328
Streptococcus mutans	PHG7	1309
Streptococcus sanguinis	PHG7	1305
Streptococcus oralis	PHG7	1303
Lactobacillus crispatus	PHG7	47770
Leuconostoc gelidum	PHG7	1244
Ligilactobacillus salivarius	PHG7	1624
Faecalibacillus intestinalis	PHG7	1982626
Catenibacterium sp. co_0103	PHG7	2478954
Turicibacter sanguinis	PHG7	154288
Phascolarctobacterium faecium	PHG7	33025
Bifidobacterium breve	PHG7	1685
Bifidobacterium dentium	PHG7	1689
Streptomyces sp. ICC4	PHG7	2099584
Actinomyces sp. oral taxon 171	PHG7	706438
Actinomyces sp. oral taxon 169	PHG7	712116
Gordonibacter urolithinfaciens	PHG7	1335613
Gordonibacter pamelaeae	PHG7	471189
Raoultibacter timonensis	PHG7	1907662
Enterococcus avium	PHG7	33945
Bifidobacterium animalis	PHG7	28025
Gardnerella vaginalis	PHG7	2702
Ruminococcus bovis	PHG7	2564099
Ruthenibacterium lactatiformans	PHG7	1550024
Clostridium sp. BJN0001	PHG7	2930219
Clostridium cadaveris	PHG7	1529
Clostridium isatidis	PHG7	182773
Clostridium baratii	PHG7	1561
Clostridium kluyveri	PHG7	1534
Clostridium chauvoei	PHG7	46867
Clostridium sporogenes	PHG7	1509
Mogibacterium pumilum	PHG7	86332
Aminipila terrae	PHG7	2697030
Aminipila luticellarii	PHG7	2507160
Romboutsia hominis	PHG7	1507512
Terrisporobacter sp. MCA3	PHG7	2813371
Paeniclostridium sordellii	PHG7	1505
Filifactor alocis	PHG7	143361
Vallitalea guaymasensis	PHG7	1185412
Streptococcus sp. FDAARGOS_192	PHG7	1839799
Streptococcus sp. oral taxon 061	PHG7	712623
Streptococcus sp. oral taxon 431	PHG7	712633
Streptococcus sp. oral taxon 064	PHG7	712624
Streptococcus sp. NSJ-72	PHG7	2763068
Streptococcus sp. NPS 308	PHG7	1902136
Streptococcus sp. 1643	PHG7	2576376
Streptococcus agalactiae	PHG7	1311
Streptococcus milleri	PHG7	33040
Streptococcus pseudopneumoniae	PHG7	257758
Streptococcus sobrinus	PHG7	1310
Lactococcus raffinolactis	PHG7	1366
Leuconostoc mesenteroides	PHG7	1245
Weissella confusa	PHG7	1583
Levilactobacillus brevis	PHG7	1580
Enterococcus thailandicus	PHG7	417368
Enterococcus gallinarum	PHG7	1353
Enterococcus casseliflavus	PHG7	37734
Staphylococcus simiae	PHG7	308354
Erysipelotrichaceae bacterium I46	PHG7	1834207
Veillonella parvula	PHG7	29466
Phoenicibacter congonensis	PHG7	1944646
Olsenella uli	PHG7	133926
Parafannyhessea umbonata	PHG7	604330
Actinomyces sp. HMT 175	PHG7	2789425
Actinomyces radicidentis	PHG7	111015
Schaalia turicensis	PHG7	131111
Bifidobacterium scardovii	PHG7	158787
Bifidobacterium lemurum	PHG7	1603886
Parascardovia denticolens	PHG7	78258
Corynebacterium accolens	PHG7	38284
Corynebacterium aurimucosum	PHG7	169292
Streptococcus periodonticum	PHG7	2490633
Lactobacillus paragasseri	PHG7	2107999
Limosilactobacillus fermentum	PHG8	1613
[Clostridium] symbiosum	PHG8	1512
Enterocloster bolteae	PHG8	208479
Enterocloster clostridioformis	PHG8	1531
Flavonifractor plautii	PHG8	292800
Collinsella aerofaciens	PHG8	74426
Parolsenella massiliensis	PHG8	1871022
Pseudomonas aeruginosa	PHG8	287
Bradyrhizobium diazoefficiens	PHG8	1355477
Rhizobium leguminosarum	PHG8	384
Bacteroides uniformis	PHG8	820
Bacteroides ovatus	PHG8	28116
Bacteroides sp. M10	PHG8	2763022
Bacteroides luhongzhouii	PHG8	2650158
Bacteroides cellulosilyticus	PHG8	246787
Bacteroides fragilis	PHG8	817
Phocaeicola vulgatus	PHG8	821
Phocaeicola salanitronis	PHG8	376805
Parabacteroides distasonis	PHG8	823
Parabacteroides johnsonii	PHG8	387661
Alistipes onderdonkii	PHG8	328813
Alistipes dispar	PHG8	2585119
Alistipes shahii	PHG8	328814
Alistipes communis	PHG8	2585118
Akkermansia muciniphila	PHG8	239935
Lachnoclostridium sp. YL32	PHG8	1834196
Anaerotruncus colihominis	PHG8	169435
Pusillibacter faecalis	PHG8	2714358
Solibaculum mannosilyticum	PHG8	2780922
Hungatella hathewayi	PHG8	154046
Eubacterium maltosivorans	PHG8	2041044
Intestinimonas butyriciproducens	PHG8	1297617
Lawsonibacter asaccharolyticus	PHG8	2108523
Limosilactobacillus oris	PHG8	1632
Lactobacillus delbrueckii	PHG8	1584
Lactobacillus gasseri	PHG8	1596
Bifidobacterium adolescentis	PHG8	1680
Bifidobacterium pseudolongum	PHG8	1694
Rothia dentocariosa	PHG8	2047
Eggerthella guodeyinii	PHG8	2690837
Arabiibacter massiliensis	PHG8	1870985
Collinsella stercoris	PHG8	147206
Bacteroides sp. A1C1	PHG8	2528203
Bacteroides sp. CBA7301	PHG8	2715212
Bacteroides sp. KGMB10229	PHG8	2884447
Bacteroides stercoris	PHG8	46506
Bacteroides zhangwenhongii	PHG8	2650157
Bacteroides faecis	PHG8	674529
Bacteroides intestinalis	PHG8	329854
Bacteroides caecimuris	PHG8	1796613
Alistipes finegoldii	PHG8	214856
Alistipes senegalensis	PHG8	1288121
Alistipes megaguti	PHG8	2364787
Butyricimonas faecalis	PHG8	2093856
Paraprevotella xylaniphila	PHG8	454155
Cupriavidus taiwanensis	PHG8	164546
Variovorax paradoxus	PHG8	34073
Desulfovibrio piger	PHG8	901
Sorangium cellulosum	PHG8	56
Limosilactobacillus reuteri	PHG8	1598
Acidaminococcus intestini	PHG8	187327
Megasphaera stantonii	PHG8	2144175
Bifidobacterium angulatum	PHG8	1683
Turicimonas muris	PHG8	1796652
Bacteroides eggerthii	PHG8	28111
Alistipes indistinctus	PHG8	626932
Anaerotignum propionicum	PHG8	28446
Lacticaseibacillus paracasei	PHG8	1597
Dialister pneumosintes	PHG8	39950
Selenomonas sputigena	PHG8	69823
Eggerthella sp. YY7918	PHG8	502558
Berryella intestinalis	PHG8	1531429
Slackia heliotrinireducens	PHG8	84110
Denitrobacterium detoxificans	PHG8	79604
Coriobacterium glomerans	PHG8	33871
Olsenella timonensis	PHG8	1805478
Thermophilibacter immobilis	PHG8	2779519
Bifidobacterium saguini	PHG8	762210
Bifidobacterium thermophilum	PHG8	33905
Mycobacterium marinum	PHG8	1781
Mycolicibacterium phocaicum	PHG8	319706
Bacteroides sp. HF-162	PHG8	2785531
Bacteroides sp. CACC 737	PHG8	2755405
Parabacteroides sp. CT06	PHG8	2025876
Barnesiella viscericola	PHG8	397865
Halopseudomonas aestusnigri	PHG8	857252
Stenotrophomonas maltophilia	PHG8	40324
Luteimonas sp. MC1825	PHG8	2761107
Burkholderia cenocepacia	PHG8	95486
Desulfovibrio desulfuricans	PHG8	876
Desulfovibrio vulgaris	PHG8	881
Desulfovibrio fairfieldensis	PHG8	44742
Limosilactobacillus vaginalis	PHG8	1633
Blautia wexlerae	PHG9	418240
Blautia argi	PHG9	1912897
Blautia producta	PHG9	33035
uncultured Blautia sp.	PHG9	765821
Blautia liquoris	PHG9	2779518
Anaerostipes rhamnosivorans	PHG9	1229621
[Eubacterium] rectale	PHG9	39491
Roseburia intestinalis	PHG9	166486
Roseburia hominis	PHG9	301301
Roseburia sp. NSJ-69	PHG9	2763062
Coprococcus catus	PHG9	116085
[Clostridium] hylemonae	PHG9	89153
Lachnospiraceae bacterium	PHG9	1898203
Lachnospiraceae bacterium GAM79	PHG9	2109691
Anaerocolumna sedimenticola	PHG9	2696063
Lachnospira eligens	PHG9	39485
Faecalicatena sp. Marseille-Q4148	PHG9	2823316
Oscillospiraceae bacterium	PHG9	2485925
Faecalibacterium prausnitzii	PHG9	853
Faecalibacterium sp. IP329	PHG9	2929489
Faecalibacterium sp. I2392	PHG9	2929490
Faecalibacterium sp. I4384	PHG9	2929495
Faecalibacterium sp. I4179	PHG9	2929494
[Eubacterium] siraeum	PHG9	39492
Thermoclostridium stercorarium	PHG9	1510
Vescimonas coprocola	PHG9	2714355
Clostridium sp. SY8519	PHG9	1042156
Clostridium sp. M62/1	PHG9	411486
Clostridium saccharoperbutylacetonicum	PHG9	36745
Clostridioides difficile	PHG9	1496
butyrate-producing bacterium SS3/4	PHG9	245014
uncultured Clostridia bacterium	PHG9	244328
Longicatena caecimuris	PHG9	1796635
Yersinia frederiksenii	PHG9	29484
uncultured human fecal virus	PHG9	239364
Blautia pseudococcoides	PHG9	1796616
Coprococcus eutactus	PHG9	33043
Wujia chipingensis	PHG9	2763670
Anaerocolumna chitinilytica	PHG9	1727145
Butyrivibrio hungatei	PHG9	185008
Butyrivibrio fibrisolvens	PHG9	831
Cellulosilyticum sp. WCF-2	PHG9	2497860
Lacrimispora saccharolytica	PHG9	84030
Lacrimispora sphenoides	PHG9	29370
Simiaoa sunii	PHG9	2763672
Lachnoanaerobaculum umeaense	PHG9	617123
Novisyntrophococcus fermenticellae	PHG9	2068655
Qiania dongpingensis	PHG9	2763669
Faecalibacterium sp. HTFF	PHG9	2929491
Faecalibacterium sp. I3389	PHG9	2929493
Faecalibacterium sp. I3333	PHG9	2929492
Vescimonas fastidiosa	PHG9	2714353
Dysosmobacter welbionis	PHG9	2093857
Clostridium sp. DL-VIII	PHG9	641107
Eubacterium sp. MSJ-33	PHG9	2841528
Clostridiales bacterium CCNA10	PHG9	2109688
Vallitalea pronyensis	PHG9	1348613
Symbiobacterium thermophilum	PHG9	2734
Paenibacillus sp. H1-7	PHG9	2282849
Paenibacillus ihbetae	PHG9	1870820
Paenibacillus yonginensis	PHG9	1462996
Brevibacillus laterosporus	PHG9	1465
Streptococcus mitis	PHG9	28037
Corynebacterium argentoratense	PHG9	42817
Prevotella intermedia	PHG9	28131
Haemophilus parainfluenzae	PHG9	729
Bacteriophage sp.	PHG9	38018
Paenibacillus rhizovicinus	PHG9	2704463
Paenibacillus agaridevorans	PHG9	171404
Anaerocolumna cellulosilytica	PHG9	433286
Clostridium butyricum	PHG9	1492
Clostridium tetani	PHG9	1513
Clostridium novyi	PHG9	1542
Faecalibacterium sp. IP118	PHG9	2929488
Ruminococcus sp. FMBCY1	PHG9	2831966
Ruminococcus champanellensis	PHG9	1161942
Ruminococcus albus	PHG9	1264
Acutalibacter muris	PHG9	1796620
Caproiciproducens sp. NJN-50	PHG9	2507162
Monoglobus pectinilyticus	PHG9	1981510
Oscillibacter sp. NSJ-62	PHG9	2763056
Caproicibacter fermentans	PHG9	2576756
Caproicibacterium lactatifermentans	PHG9	2666138
Pseudoclostridium thermosuccinogenes	PHG9	84032
Ethanoligenens harbinense	PHG9	253239
Mageeibacillus indolicus	PHG9	884684
Lachnoclostridium phytofermentans	PHG9	66219
Coprococcus sp. ART55/1	PHG9	751585
Butyrivibrio proteoclasticus	PHG9	43305
Pseudobutyrivibrio xylanivorans	PHG9	185007
Herbinix luporum	PHG9	1679721
Cellulosilyticum lentocellum	PHG9	29360
Alkalibacter sp. ES005	PHG9	2815577
Clostridium sp. C5S11	PHG9	704125
Clostridium manihotivorum	PHG9	2320868
Clostridium argentinense	PHG9	29341
Geosporobacter ferrireducens	PHG9	1424294
Emergencia timonensis	PHG9	1776384
Peptoclostridium acidaminophilum	PHG9	1731
Acetoanaerobium sticklandii	PHG9	1511
Desulfosporosinus orientis	PHG9	1563
Streptococcus gwangjuense	PHG9	1433513
Ligilactobacillus murinus	PHG9	1622
Ligilactobacillus agilis	PHG9	1601
Carnobacterium maltaromaticum	PHG9	2751
Bacillus amyloliquefaciens	PHG9	1390
Paenibacillus sp. B01	PHG9	2660554
Paenibacillus sp. DCT19	PHG9	2211212
Paenibacillus sp. PK3_47	PHG9	2072642
Paenibacillus sp. FSL P4-0081	PHG9	1536769
Paenibacillus sp. sptzw28	PHG9	715179
Paenibacillus riograndensis	PHG9	483937
Paenibacillus cellulositrophicus	PHG9	562959
Paenibacillus lautus	PHG9	1401
Brevibacillus choshinensis	PHG9	54911
Phascolarctobacterium sp. Marseille-Q4147	PHG9	2823317
Megasphaera elsdenii	PHG9	907
Erwinia gerundensis	PHG9	1619313
Pseudomonas chlororaphis	PHG9	587753
Vibrio fluvialis	PHG9	676
Aeromonas hydrophila	PHG9	644
Agrobacterium tumefaciens	PHG9	358
Burkholderia multivorans	PHG9	87883
Paraburkholderia caribensis	PHG9	75105
Campylobacter jejuni	PHG9	197
Campylobacter coli	PHG9	195
Desulfosarcina widdelii	PHG9	947919
