# Supplementary material
Source: Research Square preprint supplement (doi:10.21203/rs.3.rs-9927529/v1)
Supplement: Supplementary file 6 [file 693d01ddf0f81da8a7e3bf6c.xlsx]

## Sheet: Core vs Accessory
Table S4-1. Distribution of core and accessory microbial taxa across the donors
Donor	n_Core_Taxa	n_Accessory_Taxa
OD1	34	231
OD2	21	275
OD3	10	192
OD4	34	260
OD5	23	177
OD7	9	143
OD8	22	223
OD9	85	236

## Sheet: Core Taxa Variability
Table S4-2. Variability of core microbial taxa across donors
Taxon	CV	IQR
[Ruminococcus] gnavus	1.8411	0.00838227
Staphylococcus aureus	1.71401	0.00217534
Anaerostipes hadrus	1.67766	0.00488361			CV < 0.5 = stable
Ruminococcus sp. SR1/5	1.5422	0.00439658
Enterocloster bolteae	1.54005	0.00477669			CV= 0.5-1 = moderate
Blautia massiliensis	1.52364	0.00405302
[Clostridium] innocuum	1.48673	0.00510592			CV=1-1.5 = high
Blautia wexlerae	1.42495	0.011791
uncultured Clostridia bacterium	1.24774	0.00417919			CV>1.5 = extreme
[Ruminococcus] torques	1.24409	0.00542327
Oscillospiraceae bacterium	1.24066	0.0151098
Escherichia coli	1.14175	0.00642462
Eggerthella lenta	1.09349	0.00531345
Bifidobacterium longum	0.907783	0.0131892
Collinsella aerofaciens	0.830818	0.0100178
Botrytis cinerea	0.373231	8.53856e-05
Saccharomyces cerevisiae	0.292903	0.000718007
Toxoplasma gondii	0.282099	0.00107724

## Sheet: Duodenum_Core
Table S4-3. Core microbial taxa identified in the Duodenum
Duodenum_Core
Anaerostipes-hadrus
Bifidobacterium-longum
Blautia-massiliensis
Blautia-wexlerae
Botrytis-cinerea
Collinsella-aerofaciens
Eggerthella-lenta
Erysipelatoclostridium-ramosum
Escherichia-coli
Oscillospiraceae-bacterium
[Ruminococcus]-gnavus
Ruminococcus-sp.-SR1/5
[Ruminococcus]-torques
Saccharomyces-cerevisiae
Staphylococcus-aureus
Streptococcus-thermophilus
Toxoplasma-gondii
uncultured-Clostridia-bacterium

## Sheet: Jejunum_Core
Table S4-4. Core microbial taxa identified in the Jejunum
Jejunum_Core
Botrytis-cinerea
Escherichia-coli
Oscillospiraceae-bacterium
Saccharomyces-cerevisiae
Staphylococcus-aureus
Toxoplasma-gondii
uncultured-Clostridia-bacterium

## Sheet: Ileum_Core
Table S4-5. Core microbial taxa identified in the Ileum
Ileum_Core
Anaerostipes-hadrus
Bifidobacterium-longum
Blautia-massiliensis
Blautia-wexlerae
Botrytis-cinerea
[Clostridium]-innocuum
Collinsella-aerofaciens
Eggerthella-lenta
Escherichia-coli
Oscillospiraceae-bacterium
[Ruminococcus]-gnavus
Ruminococcus-sp.-SR1/5
[Ruminococcus]-torques
Saccharomyces-cerevisiae
Staphylococcus-aureus
Streptococcus-salivarius
Toxoplasma-gondii
uncultured-Clostridia-bacterium

## Sheet: AscendingColon_Core
Table S4-6. Core microbial taxa identified in the Ascending colon
AscendingColon_Core
Anaerobutyricum-hallii
Anaerostipes-hadrus
Bacteroides-thetaiotaomicron
Bifidobacterium-longum
Blautia-massiliensis
Blautia-obeum
Blautia-sp.-NBRC-113351
Blautia-wexlerae
[Clostridium]-innocuum
[Clostridium]-scindens
Collinsella-aerofaciens
Coprococcus-comes
Dorea-longicatena
Eggerthella-lenta
Enterocloster-bolteae
Escherichia-coli
[Eubacterium]-rectale
Faecalibacterium-prausnitzii
Oscillospiraceae-bacterium
[Ruminococcus]-gnavus
Ruminococcus-sp.-SR1/5
[Ruminococcus]-torques
Saccharomyces-cerevisiae
Staphylococcus-aureus
Streptococcus-thermophilus
Toxoplasma-gondii
uncultured-Clostridia-bacterium

## Sheet: TransverseColon_Core
Table S4-7. Core microbial taxa identified in the Transverse colon
TransverseColon_Core
Anaerostipes-hadrus
Bifidobacterium-longum
Blautia-massiliensis
Blautia-wexlerae
Botrytis-cinerea
[Clostridium]-innocuum
Collinsella-aerofaciens
Eggerthella-lenta
Enterocloster-bolteae
Escherichia-coli
[Eubacterium]-rectale
Oscillospiraceae-bacterium
[Ruminococcus]-gnavus
Ruminococcus-sp.-SR1/5
[Ruminococcus]-torques
Saccharomyces-cerevisiae
Staphylococcus-aureus
Streptococcus-pneumoniae
Toxoplasma-gondii
uncultured-Clostridia-bacterium

## Sheet: DescendingColon_Core
Table S4-8. Core microbial taxa identified in the Descending colon
DescendingColon_Core
Anaerostipes-caccae
Anaerostipes-hadrus
Bacteroides-caccae
Bacteroides-ovatus
Bacteroides-thetaiotaomicron
Bifidobacterium-longum
Blautia-massiliensis
Blautia-wexlerae
[Clostridium]-innocuum
[Clostridium]-scindens
Collinsella-aerofaciens
Eggerthella-lenta
Enterocloster-bolteae
Erysipelatoclostridium-ramosum
Erysipelotrichaceae-bacterium-66202529
Escherichia-coli
Flavonifractor-plautii
Oscillospiraceae-bacterium
Parabacteroides-distasonis
Parabacteroides-merdae
Phocaeicola-dorei
[Ruminococcus]-gnavus
Ruminococcus-sp.-SR1/5
[Ruminococcus]-torques
Ruthenibacterium-lactatiformans
Saccharomyces-cerevisiae
Sellimonas-intestinalis
Staphylococcus-aureus
Toxoplasma-gondii
uncultured-Clostridia-bacterium

## Sheet: Small_Intestine_Core
Table S4-9. Core microbial taxa identified in the Small intestine
Small_Intestine_Core
Toxoplasma gondii
Staphylococcus aureus
Oscillospiraceae bacterium
Saccharomyces cerevisiae
uncultured Clostridia bacterium
Escherichia coli
Botrytis cinerea
Bifidobacterium longum
Eggerthella lenta
[Ruminococcus] torques
Blautia wexlerae
Blautia massiliensis
Ruminococcus sp. SR1/5
Anaerostipes hadrus

## Sheet: Large_Intestine_Core
Table S4-10. Core microbial taxa identified in the Large intestine
Large_Intestine_Core
Oscillospiraceae bacterium
Staphylococcus aureus
Toxoplasma gondii
Saccharomyces cerevisiae
uncultured Clostridia bacterium
[Ruminococcus] torques
Eggerthella lenta
[Ruminococcus] gnavus
Escherichia coli
Blautia wexlerae
Enterocloster bolteae
[Clostridium] innocuum
Bifidobacterium longum
Collinsella aerofaciens
Anaerostipes hadrus
Ruminococcus sp. SR1/5
Blautia massiliensis
Bacteroides thetaiotaomicron
[Clostridium] scindens
[Eubacterium] rectale

[truncated: 2 more sheets: Lumen_Core, Mucosa_Core]
