# Supplementary material
Source: Research Square preprint supplement (doi:10.21203/rs.3.rs-9927529/v1)
Supplement: Supplementary file 7 [file 7bd1eec9d7c2eb46e280d876.xlsx]

## Sheet: in
Table S2. Prevalence and mean relative abundance of all detected microbial taxa across donors, milieus, intestinal segments, and sections.
Taxon	Domain	Prevalence_pct	MeanRelAbund_pct	Donor_OD1	Donor_OD2	Donor_OD3	Donor_OD4	Donor_OD5	Donor_OD7	Donor_OD8	Donor_OD9	Lumen	Mucosa	AscendingColon	DescendingColon	Duodenum	Ileum	Jejunum	TransverseColon
Oscillospiraceae bacterium	Bacteria	100	5.16894	6.41792	4.50222	3.59682	5.29443	3.64596	3.52813	4.56711	9.63763	5.87539	4.44713	5.81716	5.54182	6.1877	5.84779	3.19055	4.59645
Bifidobacterium longum	Bacteria	100	4.91556	7.87044	2.80185	4.85651	2.59797	6.11214	5.62775	7.82652	1.52156	5.15297	4.67298	8.47738	6.61315	1.54478	8.52098	1.2197	2.9186
Escherichia coli	Bacteria	100	4.09204	0.868948	10.215	2.45384	5.99754	3.89817	5.26097	1.72657	3.13867	2.10905	6.11813	1.40412	2.96954	10.0775	1.57908	7.34914	1.75306
Staphylococcus aureus	Bacteria	100	2.86028	2.89272	3.82591	3.21038	2.26192	2.9236	3.38541	2.36374	2.13809	2.77536	2.94704	1.77974	2.33025	3.06519	2.49866	4.1277	3.31821
Eggerthella lenta	Bacteria	100	2.2106	1.61438	2.56533	1.86221	2.85174	1.4129	1.51008	1.82286	4.07207	2.61616	1.79621	3.52715	2.2981	2.30527	1.88316	2.12598	1.21803
Collinsella aerofaciens	Bacteria	100	2.09365	1.64477	3.26859	1.35617	3.1816	1.84612	0.724218	1.91987	2.98924	2.00407	2.18519	2.72261	2.57007	2.07416	1.24141	1.40914	2.58141
[Ruminococcus] gnavus	Bacteria	100	2.00019	1.29743	0.837187	0.51852	3.12212	0.922336	0.645901	1.12289	7.26815	2.47895	1.51101	3.31668	1.6062	2.95365	0.757419	2.62527	0.943355
Blautia wexlerae	Bacteria	100	1.81462	2.89941	1.98654	0.403056	1.76828	1.80923	0.832535	0.710291	4.04427	2.34438	1.27335	1.97915	1.6667	2.94503	1.97185	0.886471	1.59013
Bacteroides thetaiotaomicron	Bacteria	100	1.71589	0.428427	2.77006	0.755707	2.80395	4.6112	0.583988	1.62113	0.32048	1.64711	1.78617	2.49627	4.53652	0.32992	0.35506	0.15033	2.30279
[Ruminococcus] torques	Bacteria	100	1.48739	1.30425	1.69405	0.766994	1.57557	1.44847	1.03889	1.05202	3.01704	1.75624	1.21269	1.42929	1.77749	2.001	1.33432	0.798275	1.64454
Anaerostipes hadrus	Bacteria	100	1.442	1.76235	1.03131	0.429159	0.989815	3.0149	0.418674	0.363298	3.36814	1.88579	0.988558	1.57683	1.58843	1.68932	1.73603	0.671002	1.42971
Enterocloster bolteae	Bacteria	100	1.4208	0.416741	1.67365	1.99012	0.766263	1.1023	2.03996	3.43771	0.149885	0.641092	2.21746	0.586501	1.32277	1.465	2.35319	0.457084	2.29364
Limosilactobacillus fermentum	Bacteria	98.9247	1.4041	1.1227	6.89497	0.332789	1.50039	0.943185	0.430863	0.794961	0.07728	2.17417	0.617281	0.996329	0.858147	0.450078	0.70875	0.356223	4.9103
uncultured Clostridia bacterium	Bacteria	100	1.37219	1.35275	1.30715	1.2981	1.20638	0.937331	1.32175	1.12238	2.40004	1.49817	1.24347	1.36486	1.41353	1.64077	1.44166	1.15764	1.24779
Ruminococcus sp. SR1/5	Bacteria	98.9247	1.24805	1.799	0.612547	0.289676	1.0053	2.70728	0.231013	0.654999	2.52929	1.81374	0.670068	1.7947	0.813754	1.13237	1.9895	0.4399	1.33781
Blautia massiliensis	Bacteria	97.8495	1.16353	1.68009	0.584555	0.29374	0.923991	2.43102	0.208967	0.667003	2.38103	1.68413	0.631613	1.67165	0.766555	1.01869	1.88905	0.413345	1.23556
Streptococcus lutetiensis	Bacteria	81.7204	1.07681	2.78321	0.022542	1.63554	3.34388	0.172369	0.12232	0.068157	0.206726	0.461277	1.70573	2.60919	0.828764	0.173191	0.100898	1.50893	1.22273
[Clostridium] innocuum	Bacteria	100	1.03837	0.631812	0.606726	0.37675	1.99955	0.809449	0.392851	0.66555	2.72126	1.25051	0.821615	1.43676	1.17638	1.53248	0.385837	1.02218	0.763248
Parabacteroides distasonis	Bacteria	100	0.904262	0.368866	1.21357	1.06839	1.0252	1.41643	0.857098	1.21948	0.142886	0.788504	1.02254	1.3226	1.62265	0.388584	0.716735	0.304639	1.03204
Phocaeicola dorei	Bacteria	97.8495	0.761073	1.0099	0.233981	1.56139	0.174087	0.214007	0.960562	1.81231	0.122103	0.73852	0.784116	1.60834	0.922852	0.139403	0.614525	0.165731	1.09084
Parabacteroides merdae	Bacteria	97.8495	0.723444	0.10244	0.710009	0.983044	0.67201	2.54482	0.119843	0.432502	0.196398	0.859052	0.584887	0.574844	0.983839	0.054825	0.202841	1.45229	0.979159
Streptococcus thermophilus	Bacteria	100	0.719849	0.621241	0.834009	0.467126	0.479295	1.32681	0.389652	0.307136	1.31815	0.945229	0.489569	0.85867	0.695929	0.793297	0.867568	0.321755	0.799729
Phocaeicola vulgatus	Bacteria	98.9247	0.685352	0.176703	0.892186	0.478425	0.916069	1.37675	0.760599	0.761187	0.161689	0.583731	0.789181	0.589128	1.47254	0.325991	0.725741	0.184059	0.763721
[Eubacterium] rectale	Bacteria	100	0.668716	0.604395	0.621041	0.271601	0.601596	0.288061	0.510525	0.401289	2.02099	0.783351	0.551588	0.559615	0.793948	0.750391	0.915387	0.320132	0.676211
Klebsiella pneumoniae	Bacteria	96.7742	0.659887	0.044799	1.48267	0.07672	0.615229	1.2862	0.202291	1.70276	0.092462	0.446496	0.877917	0.795199	1.75337	0.530227	0.038426	0.170203	0.664152
Bacteroides caccae	Bacteria	95.6989	0.595552	0.292525	0.839076	0.30687	0.900089	1.2254	0.309077	0.765243	0.180866	0.60167	0.5893	0.799988	1.60237	0.08817	0.187123	0.101509	0.743501
Dorea longicatena	Bacteria	100	0.537858	0.403148	1.01191	0.197824	0.396424	0.309106	0.481388	0.251128	1.30705	0.698832	0.373384	0.431379	0.59534	0.949804	0.456469	0.230904	0.608089
Anaerobutyricum hallii	Bacteria	98.9247	0.503097	0.532746	0.705772	0.113018	0.502389	0.224339	0.453347	0.236334	1.26838	0.589992	0.414312	0.377118	0.451281	0.879934	0.502658	0.220684	0.626136
Enterococcus faecium	Bacteria	98.9247	0.476502	0.260772	0.651077	0.100504	0.633786	0.128086	0.12113	0.483699	1.46266	0.604077	0.346154	0.529179	0.662339	0.901905	0.077502	0.395466	0.349088
Faecalibacterium prausnitzii	Bacteria	100	0.456303	0.216904	0.239624	0.411985	0.208088	0.147812	0.630336	0.828632	0.961957	0.497065	0.414655	0.531043	0.465258	0.115568	0.991848	0.137555	0.458626
Erysipelotrichaceae bacterium 66202529	Bacteria	98.9247	0.435331	0.545702	0.049172	0.757344	0.178542	0.501807	0.481832	0.820068	0.115887	0.556532	0.311496	0.696615	0.436467	0.116709	1.06845	0.094746	0.175504
Blautia sp. SC05B48	Bacteria	96.7742	0.423372	0.609883	0.216972	0.099248	0.334486	0.851497	0.079156	0.229821	0.915381	0.615595	0.22697	0.61457	0.27929	0.37291	0.676311	0.154956	0.447835
[Clostridium] scindens	Bacteria	100	0.400324	0.275426	0.519062	0.234442	0.338041	0.251506	0.390434	0.265831	0.936433	0.46333	0.335949	0.439875	0.419406	0.45547	0.338656	0.13804	0.619864
Eubacterium callanderi	Bacteria	97.8495	0.371209	0.201932	0.502483	0.550276	0.432676	0.499517	0.255675	0.314455	0.229804	0.389664	0.352352	0.498446	0.468595	0.330228	0.423365	0.204873	0.304574
Enterococcus faecalis	Bacteria	98.9247	0.358442	0.914587	0.068024	0.541238	1.04594	0.106967	0.055643	0.03436	0.025365	0.169018	0.551983	0.815828	0.260946	0.098733	0.041805	0.525564	0.403898
Streptococcus pneumoniae	Bacteria	100	0.338311	0.407415	0.253542	0.506422	0.271384	0.362923	0.375499	0.347972	0.168011	0.285868	0.391895	0.255185	0.282532	0.379016	0.370324	0.488284	0.254421
Coprococcus comes	Bacteria	98.9247	0.329743	0.24142	0.417416	0.130019	0.321201	0.328975	0.243959	0.191844	0.76623	0.388617	0.269589	0.260487	0.464568	0.408079	0.276696	0.137068	0.437024
Bacteroides uniformis	Bacteria	97.8495	0.318409	0.281876	0.167687	0.837255	0.139432	0.204424	0.31655	0.518611	0.073003	0.34318	0.2931	0.804665	0.342131	0.079743	0.187564	0.13789	0.359022
Erysipelatoclostridium ramosum	Bacteria	100	0.309212	0.41223	0.210388	0.126688	0.318091	0.599498	0.1267	0.125848	0.522498	0.419111	0.196923	0.287314	0.237399	0.414148	0.38806	0.176194	0.363903
Listeria monocytogenes	Bacteria	64.5161	0.294384	0.19703	1.79022	0.01172	0.314855	0.033581	0.126057	0.112818	0.002963	0.566037	0.016825	0.271297	0.033523	0.094374	0.010468	0.081258	1.24894
Bacteroides xylanisolvens	Bacteria	96.7742	0.278097	0.072152	0.382712	0.221297	0.418755	0.667724	0.119996	0.269066	0.089754	0.288391	0.267578	0.359021	0.630514	0.077118	0.096715	0.130974	0.354174
Bifidobacterium adolescentis	Bacteria	87.0968	0.277443	0.164452	0.373562	0.143911	0.410389	0.614138	0.049515	0.460527	0.034325	0.197362	0.359264	0.194585	0.501982	0.04804	0.249866	0.176471	0.459858
Bacteroides ovatus	Bacteria	92.4731	0.238513	0.104282	0.170686	0.430182	0.124417	0.422456	0.27908	0.289005	0.080902	0.241561	0.235399	0.288268	0.280146	0.096514	0.235156	0.266692	0.249664
Gardnerella vaginalis	Bacteria	48.3871	0.237664	0.014177	0.002503	0.007619	0.001142	0.013579	0.002623	0.001772	1.79905	0.464177	0.006228	0.008559	0.00182	0.001745	1.35922	0.001471	0.009357
Akkermansia muciniphila	Bacteria	93.5484	0.234704	0.046175	0.290376	0.564024	0.055531	0.033293	0.214233	0.594346	0.1189	0.203369	0.26672	0.341486	0.155299	0.21188	0.295349	0.174757	0.233273
Acidaminococcus intestini	Bacteria	82.7957	0.222435	0.101078	0.420883	0.227762	0.050357	0.017479	0.272917	0.749281	0.016704	0.10493	0.342495	0.05342	0.226291	0.168945	0.442824	0.072976	0.352907
Streptococcus salivarius	Bacteria	100	0.218331	0.222275	0.332445	0.120949	0.13795	0.111693	0.360517	0.146577	0.327285	0.290798	0.14429	0.156122	0.252676	0.218038	0.234105	0.076404	0.368719
Bacteroides stercoris	Bacteria	94.6237	0.215223	0.056989	0.201468	0.342306	0.052602	0.256754	0.361851	0.371908	0.088667	0.137218	0.294922	0.039882	0.15329	0.168566	0.395276	0.209858	0.307673
Alistipes shahii	Bacteria	95.6989	0.209455	0.105182	0.278157	0.320609	0.058265	0.030944	0.254882	0.604204	0.067743	0.114422	0.306554	0.226495	0.161247	0.139633	0.292249	0.043395	0.386048
Sellimonas intestinalis	Bacteria	69.8925	0.20459	0.156503	0.046446	0.105597	0.480605	0.040566	0.05503	0.140478	0.579795	0.254751	0.153338	0.371907	0.189013	0.41462	0.082097	0.18417	0.022444
Granulibacter bethesdensis	Bacteria	95.6989	0.198474	0.238015	0.189272	0.277315	0.160247	0.192484	0.273448	0.148603	0.102722	0.173662	0.223826	0.223568	0.165994	0.166632	0.217457	0.213471	0.201312
Polynucleobacter sp. MG-Unter2-18	Bacteria	96.7742	0.195397	0.228081	0.101183	0.32055	0.111485	0.233707	0.251629	0.181907	0.117808	0.15652	0.23512	0.099229	0.193121	0.163121	0.227789	0.374289	0.104788
Bacteroides sp. KGMB07931	Bacteria	45.1613	0.191114	0.00338	0.006957	0.433506	0.011063	0.931755	0.009867	0.025091	0.062768	0.263394	0.117264	0.021556	0.027586	0.002819	0.045564	0.700505	0.314521
Clostridium botulinum	Bacteria	79.5699	0.187392	0.002575	0.006134	0.019583	0.601129	0.633241	0.002242	0.193668	0.010878	0.301205	0.071105	0.314763	0.059196	0.066649	0.520782	0.041864	0.113966
Ruthenibacterium lactatiformans	Bacteria	74.1935	0.184911	0.064335	0.297853	0.057985	0.335643	0.130464	0.029906	0.430565	0.171835	0.158674	0.211719	0.254819	0.504759	0.132412	0.050595	0.059116	0.105574
Blautia sp. NBRC 113351	Bacteria	89.2473	0.18163	0.118268	0.126588	0.143216	0.38475	0.044397	0.086717	0.133843	0.402104	0.235379	0.126712	0.292282	0.156609	0.367818	0.094269	0.142531	0.066459
Alistipes onderdonkii	Bacteria	90.3226	0.181146	0.101213	0.109943	0.509554	0.107943	0.072138	0.142301	0.187724	0.207036	0.261625	0.098918	0.458142	0.229239	0.047461	0.111125	0.104523	0.13699
Streptococcus vestibularis	Bacteria	89.2473	0.179128	0.056676	0.419504	0.070946	0.134287	0.082836	0.130321	0.102336	0.469778	0.228064	0.129128	0.133154	0.235424	0.284297	0.092738	0.058366	0.28106
Lactococcus lactis	Bacteria	86.0215	0.172959	0.012915	0.057072	0.204281	0.912582	0.029776	0.016276	0.024688	0.094414	0.070053	0.278103	0.0179	0.049418	0.029931	0.016323	0.235634	0.660979
Geobacillus zalihae	Bacteria	61.2903	0.167372	0.047495	0.101315	0.090763	0.090991	0.08148	0.441097	0.35029	0.139782	0.172952	0.161672	0.343499	0.137108	0.017752	0.109259	0.263992	0.124931
Blautia obeum	Bacteria	98.9247	0.163172	0.161953	0.230823	0.128189	0.147713	0.125923	0.099836	0.090113	0.326015	0.206991	0.118401	0.246635	0.130506	0.188389	0.192595	0.090156	0.139121
Bifidobacterium breve	Bacteria	93.5484	0.154914	0.076514	0.235231	0.04527	0.12122	0.052524	0.113766	0.223743	0.390167	0.184439	0.124747	0.128803	0.192017	0.17526	0.096076	0.086796	0.251442
Roseburia intestinalis	Bacteria	97.8495	0.151367	0.2082	0.057881	0.041108	0.169495	0.075456	0.081062	0.098213	0.459511	0.146631	0.156206	0.147628	0.096843	0.183597	0.299651	0.09869	0.085588
Bacteroides salyersiae	Bacteria	84.9462	0.14327	0.228165	0.034377	0.238652	0.014095	0.018445	0.221629	0.38544	0.007392	0.130466	0.156353	0.277278	0.189908	0.011122	0.092546	0.021468	0.259157
Schaalia odontolytica	Bacteria	94.6237	0.140925	0.245445	0.089022	0.051168	0.083999	0.166537	0.043099	0.227948	0.218781	0.196965	0.083666	0.112847	0.260156	0.112678	0.153275	0.077856	0.12345
Bacteroides fragilis	Bacteria	92.4731	0.131315	0.079407	0.125639	0.174762	0.155443	0.117447	0.080851	0.226185	0.097746	0.135417	0.127124	0.129649	0.216098	0.06872	0.195583	0.061192	0.10872
Anaerostipes caccae	Bacteria	95.6989	0.130974	0.068345	0.04673	0.03805	0.245353	0.065041	0.023765	0.108132	0.436434	0.159538	0.10179	0.197665	0.135381	0.184646	0.027678	0.188962	0.062392
Legionella pneumophila	Bacteria	97.8495	0.129159	0.163794	0.083139	0.178951	0.086821	0.15727	0.145087	0.153343	0.059212	0.110629	0.148092	0.09166	0.098772	0.152838	0.148528	0.199216	0.084556
Salmonella enterica	Bacteria	89.2473	0.128908	0.119831	0.179955	0.170601	0.120634	0.146927	0.179741	0.03616	0.078194	0.122184	0.135779	0.202643	0.03372	0.129461	0.132615	0.160745	0.118942
Odoribacter splanchnicus	Bacteria	81.7204	0.126873	0.165981	0.039452	0.286795	0.027685	0.090581	0.140074	0.242035	0.01741	0.135678	0.117877	0.28347	0.144764	0.017844	0.067834	0.065885	0.177602
Clostridia bacterium UC5.1-1D4	Bacteria	78.4946	0.124784	0.071101	0.096831	0.112097	0.243125	0.023518	0.044693	0.116943	0.284654	0.167648	0.080988	0.204554	0.101358	0.245694	0.060904	0.122343	0.033952
Streptococcus infantarius	Bacteria	58.0645	0.124707	0.310815	0.000887	0.204434	0.383169	0.022849	0.013333	0.005772	0.025847	0.050131	0.200904	0.304803	0.090297	0.020087	0.013662	0.171996	0.145573
Bifidobacterium bifidum	Bacteria	81.7204	0.114185	0.183604	0.140722	0.07448	0.303518	0.044608	0.036599	0.124084	0.011114	0.049828	0.179942	0.236423	0.086556	0.025456	0.111744	0.120229	0.101252
Bifidobacterium pseudocatenulatum	Bacteria	79.5699	0.106811	0.147725	0.058276	0.071746	0.282688	0.177166	0.016267	0.078413	0.011752	0.06878	0.145668	0.182352	0.156645	0.018358	0.046239	0.096636	0.1343
Lachnospiraceae bacterium	Bacteria	97.8495	0.100814	0.106688	0.091449	0.103953	0.107682	0.085269	0.071849	0.090321	0.146863	0.108649	0.092808	0.123876	0.103842	0.126943	0.120037	0.050234	0.084658
Nocardia gipuzkoensis	Bacteria	95.6989	0.096953	0.117917	0.085857	0.134315	0.073741	0.114307	0.109122	0.096964	0.041553	0.081484	0.112759	0.072633	0.078062	0.091965	0.110251	0.160576	0.066088
Lacticaseibacillus rhamnosus	Bacteria	75.2688	0.092097	0.171101	0.025437	0.069587	0.018666	0.025606	0.350867	0.047859	0.012857	0.128829	0.054566	0.032463	0.044009	0.008016	0.178884	0.015008	0.259965
Flavonifractor plautii	Bacteria	94.6237	0.090728	0.038295	0.153799	0.094995	0.102252	0.108696	0.048878	0.150837	0.043589	0.087194	0.094339	0.169921	0.155801	0.032277	0.054097	0.035757	0.094157
Cutibacterium acnes	Bacteria	95.6989	0.086323	0.052649	0.056155	0.07658	0.03469	0.033517	0.11543	0.274641	0.057587	0.106601	0.065604	0.051189	0.072401	0.045535	0.050225	0.203042	0.088253
Mogibacterium diversum	Bacteria	92.4731	0.085523	0.145799	0.060302	0.024135	0.040005	0.047089	0.027741	0.271983	0.078463	0.132165	0.037867	0.042444	0.243969	0.050588	0.05247	0.066077	0.050529
Adlercreutzia hattorii	Bacteria	96.7742	0.083755	0.056699	0.131364	0.031782	0.09906	0.074541	0.041978	0.078709	0.163418	0.084495	0.082998	0.068879	0.106334	0.102094	0.065154	0.032862	0.128568
Legionella israelensis	Bacteria	91.3978	0.080555	0.100058	0.071451	0.122122	0.053357	0.0849	0.079192	0.091032	0.041685	0.069082	0.092278	0.053153	0.058248	0.097674	0.084715	0.138739	0.051229
Bifidobacterium dentium	Bacteria	76.3441	0.077287	0.088432	0.010715	0.010124	0.206521	0.015137	0.005784	0.042146	0.225416	0.100594	0.053474	0.09337	0.087504	0.169781	0.006314	0.108278	0.011044
Clostridium sp. M62/1	Bacteria	89.2473	0.076374	0.034459	0.176273	0.020858	0.139915	0.110556	0.021821	0.060438	0.061991	0.074662	0.078122	0.1361	0.174229	0.039681	0.03328	0.01766	0.056439
Lachnoclostridium phocaeense	Bacteria	88.172	0.076093	0.044217	0.026378	0.016662	0.146797	0.022381	0.014125	0.071442	0.258068	0.089831	0.062056	0.131717	0.085561	0.119703	0.014758	0.097311	0.016434
Blautia hansenii	Bacteria	10.7527	0.075657	0.123904	0	0	0.00831	0.090854	0	0	0.363271	0.083051	0.068102	0.078673	0.061878	0.096581	0.088632	0	0.13098
Staphylococcus capitis	Bacteria	89.2473	0.073898	0.383876	0.010128	0.065547	0.044069	0.004266	0.051058	0.014454	0.002201	0.057547	0.090603	0.038145	0.114837	0.017894	0.023157	0.223421	0.016696
Lactiplantibacillus plantarum	Bacteria	78.4946	0.071538	0.046832	0.086443	0.026339	0.014154	0.035706	0.058821	0.024978	0.277635	0.053665	0.0898	0.037662	0.044799	0.176625	0.066106	0.043629	0.071425
Dysosmobacter welbionis	Bacteria	65.5914	0.069515	0.081235	0.046783	0.081713	0.044093	0.022163	0.075925	0.144165	0.062477	0.061864	0.077333	0.13097	0.075765	0.035238	0.057855	0.021786	0.095034
Arthrobacter sp. KBS0702	Bacteria	91.3978	0.069419	0.117386	0.067141	0.117796	0.066987	0.038109	0.054776	0.068303	0.024384	0.064688	0.074253	0.064491	0.053398	0.082392	0.066225	0.076638	0.074686
Shigella flexneri	Bacteria	33.3333	0.067696	0.003729	0.208228	0.036444	0.136722	0.027362	0.113745	0.015677	0.018745	0.01609	0.120423	0.023461	0.016912	0.213683	0.012948	0.146515	0.008138
Adlercreutzia equolifaciens	Bacteria	88.172	0.067536	0.031178	0.124137	0.017562	0.071495	0.032176	0.040223	0.059304	0.172962	0.079505	0.055308	0.057822	0.06958	0.097835	0.040439	0.030589	0.112133
Wansuia hejianensis	Bacteria	100	0.067521	0.055115	0.069722	0.061387	0.074461	0.091794	0.043451	0.048137	0.094854	0.070518	0.064459	0.074771	0.091055	0.067047	0.064275	0.028689	0.079683
Sphingomonas melonis	Bacteria	74.1935	0.067158	0.021125	0.034482	0.02461	0.020668	0.024051	0.184362	0.110123	0.115976	0.070263	0.063985	0.147432	0.05416	0.003573	0.093237	0.068807	0.032807
Gordonibacter pamelaeae	Bacteria	97.8495	0.066316	0.062942	0.08597	0.059002	0.07443	0.032224	0.054547	0.05112	0.1123	0.077239	0.055155	0.103953	0.079148	0.076386	0.053487	0.045659	0.042873
Roseburia hominis	Bacteria	97.8495	0.065017	0.052444	0.061442	0.031846	0.042072	0.026436	0.124073	0.078362	0.103979	0.084382	0.045231	0.062522	0.054711	0.061904	0.11185	0.027444	0.071127
Coprococcus catus	Bacteria	94.6237	0.063832	0.102059	0.043436	0.023011	0.065671	0.038462	0.041833	0.031448	0.15864	0.068443	0.059121	0.056109	0.072542	0.08661	0.095304	0.028158	0.046634
Bacillus dafuensis	Bacteria	92.4731	0.062056	0.072974	0.050413	0.087597	0.041106	0.064146	0.075219	0.06728	0.036205	0.047891	0.076529	0.034932	0.058729	0.070859	0.058678	0.104513	0.044029
Limosilactobacillus oris	Bacteria	75.2688	0.061387	0.021908	0.094565	0.041021	0.087889	0.131936	0.01793	0.080846	0.022153	0.046504	0.076594	0.031447	0.112473	0.027382	0.058928	0.033096	0.098875
Eubacterium limosum	Bacteria	89.2473	0.061318	0.036822	0.076023	0.089554	0.080918	0.082655	0.040453	0.048687	0.036833	0.064259	0.058314	0.078031	0.076541	0.05283	0.067988	0.032389	0.060114
Vescimonas coprocola	Bacteria	80.6452	0.059667	0.048217	0.02537	0.02733	0.035174	0.009273	0.052325	0.035029	0.236851	0.084608	0.034185	0.048836	0.155736	0.038741	0.064304	0.017654	0.029441
Bacteroides sp. M10	Bacteria	81.7204	0.059298	0.022363	0.037355	0.12074	0.012757	0.025904	0.133896	0.105218	0.016317	0.035312	0.083805	0.043295	0.049577	0.065453	0.118268	0.037036	0.041926
Parvimonas micra	Bacteria	83.871	0.058283	0.11576	0.013456	0.02531	0.025807	0.050922	0.023312	0.176036	0.038006	0.0898	0.026082	0.033574	0.160583	0.025202	0.055417	0.039917	0.029327
Faecalibacterium sp. IP329	Bacteria	74.1935	0.058176	0.018718	0.090959	0.021038	0.022509	0.021448	0.031879	0.077854	0.18811	0.037967	0.078825	0.018855	0.073693	0.021724	0.173575	0.009208	0.044989
Flavobacterium johnsoniae	Bacteria	91.3978	0.056871	0.063633	0.037164	0.09575	0.036879	0.057075	0.071351	0.064013	0.026412	0.041598	0.072476	0.032934	0.060852	0.048677	0.068987	0.090674	0.036581
Pseudomonas fluorescens	Bacteria	87.0968	0.056545	0.013081	0.017966	0.088673	0.278359	0.004725	0.008577	0.010542	0.020174	0.025753	0.088006	0.007343	0.012425	0.011227	0.007508	0.084296	0.207731
Ralstonia pickettii	Bacteria	70.9677	0.056543	0.014555	0.042204	0.01485	0.016257	0.017077	0.169618	0.08394	0.093736	0.057766	0.055293	0.132395	0.037198	0.003387	0.086387	0.05177	0.026217
Massilistercora timonensis	Bacteria	87.0968	0.055624	0.028695	0.019624	0.012904	0.095848	0.020263	0.01182	0.033347	0.214635	0.068364	0.042607	0.092783	0.048702	0.081598	0.012588	0.08285	0.020792
[Eubacterium] siraeum	Bacteria	100	0.055568	0.074508	0.04223	0.04984	0.058527	0.029653	0.046092	0.047255	0.093525	0.062176	0.048817	0.063558	0.052861	0.069052	0.056323	0.050814	0.042986
Streptococcus equinus	Bacteria	58.0645	0.054937	0.1367	0.000751	0.089693	0.164878	0.007469	0.006684	0.004382	0.015691	0.023689	0.086863	0.12835	0.041508	0.012695	0.00583	0.078354	0.062192
Clostridioides difficile	Bacteria	97.8495	0.054834	0.065588	0.04907	0.036164	0.072575	0.042338	0.039718	0.032329	0.098053	0.063271	0.046213	0.069361	0.050736	0.072086	0.062599	0.029946	0.04734
Streptococcus gallolyticus	Bacteria	50.5376	0.053226	0.137867	0.000867	0.060864	0.19569	0.003779	0.001706	0.001732	0.010284	0.027437	0.079576	0.097075	0.011348	0.005961	0.003546	0.154879	0.043379
[Clostridium] symbiosum	Bacteria	97.8495	0.052541	0.046255	0.050649	0.084402	0.018946	0.017792	0.058797	0.110751	0.037274	0.040511	0.064833	0.057474	0.058001	0.057085	0.072006	0.024804	0.046754
Enterococcus avium	Bacteria	74.1935	0.051526	0.059531	0.001934	0.019157	0.128399	0.008847	0.004578	0.015506	0.16299	0.050094	0.05299	0.116691	0.036111	0.065322	0.002832	0.07792	0.01608
Actinomyces oris	Bacteria	90.3226	0.051372	0.100857	0.054235	0.027176	0.017737	0.036595	0.063087	0.052643	0.059231	0.057368	0.045247	0.035697	0.041194	0.033785	0.090885	0.02834	0.075154
Methylomagnum ishizawai	Bacteria	81.7204	0.050002	0.034249	0.017127	0.104467	0.02313	0.031682	0.119663	0.013661	0.04753	0.042952	0.057206	0.017135	0.077788	0.02779	0.03768	0.10205	0.03274
Lachnospiraceae bacterium GAM79	Bacteria	98.9247	0.049356	0.047135	0.052252	0.050209	0.032893	0.025906	0.044364	0.072631	0.071885	0.056383	0.042177	0.05311	0.052111	0.055899	0.053824	0.041358	0.040889
Faecalibacterium sp. I2392	Bacteria	65.5914	0.048003	0.013055	0.042074	0.011076	0.028248	0.023237	0.017654	0.040239	0.206803	0.037125	0.059117	0.016298	0.066401	0.008809	0.155764	0.009245	0.024619
Gordonibacter urolithinfaciens	Bacteria	92.4731	0.046034	0.041243	0.051695	0.018031	0.071658	0.017063	0.025698	0.036404	0.106621	0.056884	0.034948	0.057101	0.082879	0.05388	0.025419	0.036089	0.022508
Bacteroides zhangwenhongii	Bacteria	60.2151	0.044699	0.004167	0.009124	0.089284	0.00604	0.184001	0.02024	0.01964	0.017078	0.056514	0.032627	0.011505	0.017118	0.00735	0.025949	0.136203	0.063326
Lachnoclostridium sp. YL32	Bacteria	83.871	0.044567	0.051114	0.019897	0.063287	0.01224	0.014021	0.093154	0.081567	0.020228	0.041842	0.047351	0.077699	0.045619	0.02059	0.057167	0.015359	0.050041
Lawsonella clevelandensis	Bacteria	79.5699	0.043456	0.11049	0.00569	0.06765	0.021166	0.023318	0.074088	0.010427	0.025771	0.05974	0.026818	0.06867	0.066388	0.011834	0.080494	0.009334	0.021639
Bacillus cereus	Bacteria	86.0215	0.042396	0.04291	0.035504	0.043437	0.075055	0.04622	0.045474	0.027835	0.020371	0.04198	0.042822	0.041181	0.020057	0.033663	0.052169	0.033379	0.07276
Faecalibacillus intestinalis	Bacteria	92.4731	0.041971	0.029238	0.029973	0.037669	0.05366	0.053005	0.032478	0.059457	0.039743	0.048726	0.035069	0.020491	0.072152	0.042734	0.026208	0.034428	0.054565
Faecalibacterium sp. IP118	Bacteria	47.3118	0.041077	0.017429	0.012083	0.061789	0.004674	0.001502	0.094302	0.101678	0.035378	0.043265	0.038842	0.068642	0.026458	0.010597	0.069026	0.008011	0.061641
Bacteroides cellulosilyticus	Bacteria	82.7957	0.039684	0.012274	0.040212	0.055615	0.055305	0.070437	0.024797	0.048903	0.010782	0.043348	0.03594	0.060859	0.082497	0.009138	0.01655	0.025539	0.041023
Faecalibacterium sp. I4384	Bacteria	75.2688	0.039401	0.006667	0.019789	0.034346	0.02073	0.020524	0.017336	0.055952	0.137971	0.038415	0.040408	0.031448	0.041533	0.007939	0.122273	0.013478	0.015304
[Clostridium] hylemonae	Bacteria	92.4731	0.036971	0.063123	0.037705	0.019984	0.043571	0.029691	0.019905	0.02429	0.056561	0.04373	0.030065	0.043017	0.03624	0.052732	0.04154	0.017265	0.033379
Enterocloster clostridioformis	Bacteria	82.7957	0.036754	0.034139	0.021702	0.044253	0.012989	0.0123	0.070677	0.070556	0.027721	0.034969	0.038578	0.056941	0.035416	0.021187	0.049068	0.012465	0.04476
Bacteroides sp. A1C1	Bacteria	54.8387	0.036607	0.028963	0.028775	0.047665	0.015987	0.062716	0.038873	0.042679	0.026396	0.035778	0.037453	0.034134	0.050817	0.011471	0.032248	0.031682	0.055992
Bacteroides sp. CACC 737	Bacteria	50.5376	0.036376	0.017397	0.014809	0.076923	0.007601	0.086403	0.033293	0.04341	0.00816	0.035592	0.037177	0.031779	0.027899	0.005506	0.027061	0.060025	0.061838
Pseudomonas aeruginosa	Bacteria	90.3226	0.036117	0.050767	0.05528	0.045775	0.022826	0.019132	0.045461	0.036934	0.01602	0.035583	0.036662	0.054316	0.022932	0.018838	0.031171	0.034035	0.054386
Streptococcus agalactiae	Bacteria	54.8387	0.035925	0.027916	0.044007	0.019451	0.066578	0.006673	0.013148	0.022018	0.087795	0.035784	0.036068	0.059083	0.041758	0.050067	0.010703	0.024968	0.032185
Actinomyces graevenitzii	Bacteria	76.3441	0.034926	0.056129	0.021478	0.010254	0.02021	0.07431	0.005538	0.014117	0.073396	0.04979	0.019739	0.038571	0.037418	0.024598	0.050344	0.015918	0.041644
Streptococcus anginosus	Bacteria	77.4194	0.034882	0.021807	0.067795	0.015486	0.01405	0.022124	0.029797	0.035721	0.07783	0.046452	0.02306	0.028545	0.050944	0.051004	0.023867	0.01385	0.0427
Actinomyces naeslundii	Bacteria	77.4194	0.034656	0.053787	0.023423	0.013361	0.019784	0.061997	0.013585	0.014063	0.073662	0.046838	0.022209	0.036559	0.036337	0.02505	0.049714	0.016966	0.042228
Streptococcus parasanguinis	Bacteria	91.3978	0.034603	0.040055	0.035273	0.028212	0.018616	0.026449	0.047455	0.045333	0.03644	0.04611	0.022846	0.034295	0.04669	0.027925	0.038903	0.015787	0.043165
Limosilactobacillus mucosae	Bacteria	48.3871	0.033906	0.093118	0.000535	0.028089	0.127325	0.006619	0.004556	0.000273	0.002371	0.013738	0.054513	0.100316	0.02721	0.002911	0.003592	0.050487	0.019197
Klebsiella quasipneumoniae	Bacteria	91.3978	0.033342	0.015644	0.05887	0.040855	0.029714	0.023891	0.043377	0.048984	0.010956	0.028545	0.038243	0.039806	0.042095	0.045651	0.016215	0.025599	0.032627
Parabacteroides johnsonii	Bacteria	79.5699	0.033316	0.006859	0.022442	0.12669	0.017951	0.039692	0.013373	0.02909	0.008266	0.046228	0.020123	0.10376	0.022157	0.013757	0.033592	0.014614	0.013973
Alistipes finegoldii	Bacteria	74.1935	0.0333	0.030997	0.017162	0.081304	0.007166	0.004165	0.042365	0.072268	0.011526	0.030829	0.035824	0.079751	0.033044	0.007079	0.023444	0.014988	0.041117
Legionella antarctica	Bacteria	81.7204	0.032705	0.037047	0.022344	0.045614	0.021752	0.039168	0.043802	0.035003	0.015374	0.025884	0.039674	0.025428	0.024957	0.037012	0.038611	0.044557	0.025749
Latilactobacillus sakei	Bacteria	76.3441	0.031353	0.038712	0.018374	0.007303	0.019375	0.080911	0.006438	0.005336	0.07004	0.043017	0.019435	0.035719	0.031604	0.031137	0.037538	0.015006	0.037358
Sphingomonas sp. NIC1	Bacteria	53.7634	0.031116	0.009823	0.01568	0.011513	0.003819	0.00784	0.086652	0.049428	0.063128	0.031572	0.030651	0.066411	0.023695	0.001848	0.055259	0.028683	0.009349
Blautia producta	Bacteria	94.6237	0.030368	0.037848	0.021007	0.026028	0.038859	0.019888	0.020942	0.018736	0.057108	0.036854	0.023741	0.044444	0.027232	0.040971	0.033426	0.017582	0.020759
Actinomyces pacaensis	Bacteria	78.4946	0.030211	0.061146	0.019542	0.012416	0.017693	0.045236	0.009385	0.017041	0.056351	0.040745	0.019448	0.022705	0.038844	0.026188	0.049267	0.014002	0.029288
Enterococcus gallinarum	Bacteria	37.6344	0.029269	0.009125	0.002194	0.003256	0.075495	0.00344	0.000549	0.022973	0.112082	0.033826	0.024613	0.057194	0.025678	0.062902	0.000379	0.034235	0.001174
butyrate-producing bacterium SS3/4	Bacteria	91.3978	0.029069	0.047753	0.019301	0.020053	0.022303	0.009215	0.031755	0.035666	0.045428	0.030412	0.027697	0.035789	0.027845	0.036264	0.031051	0.012464	0.03232
Shigella dysenteriae	Bacteria	32.2581	0.02879	0.02246	0.020814	0.04878	0.013654	0.099303	0.011332	0.001083	0.009259	0.034243	0.023219	0.003604	0.004103	0.036241	0.006665	0.087287	0.034199
Actinomyces sp. oral taxon 169	Bacteria	77.4194	0.028536	0.041217	0.043658	0.025563	0.006954	0.009618	0.042361	0.040141	0.022263	0.033171	0.0238	0.037939	0.015304	0.01145	0.034616	0.022266	0.048091
Longicatena caecimuris	Bacteria	80.6452	0.028171	0.019117	0.044858	0.061541	0.020169	0.010798	0.017938	0.026507	0.027083	0.0356	0.020581	0.054698	0.01891	0.028432	0.042872	0.018005	0.007801
Faecalitalea cylindroides	Bacteria	86.0215	0.027963	0.056528	0.013879	0.020535	0.05418	0.012691	0.011782	0.011985	0.038447	0.023461	0.032564	0.049597	0.025334	0.028173	0.022779	0.023494	0.019781
Geobacillus thermoleovorans	Bacteria	32.2581	0.027867	0.002585	0.017866	0.013584	0.003544	0.010592	0.08262	0.068135	0.025701	0.026903	0.028853	0.059086	0.02485	0.002969	0.019728	0.048604	0.010806
Lancefieldella parvula	Bacteria	83.871	0.027294	0.043052	0.02044	0.00842	0.012644	0.047901	0.008664	0.026565	0.049462	0.039326	0.015	0.023557	0.034035	0.023946	0.038367	0.012863	0.030344
Alistipes communis	Bacteria	64.5161	0.027073	0.018466	0.020145	0.069945	0.013641	0.006161	0.026362	0.042627	0.019378	0.030249	0.023828	0.072521	0.035522	0.004513	0.015258	0.00633	0.028314
Faecalicatena sp. Marseille-Q4148	Bacteria	90.3226	0.026939	0.029189	0.032242	0.016541	0.024561	0.01526	0.017673	0.01992	0.060421	0.032978	0.020768	0.036914	0.025458	0.04025	0.02745	0.017853	0.015994
Amphibacillus xylanus	Bacteria	89.2473	0.026761	0.020466	0.027993	0.039866	0.022592	0.015155	0.057005	0.018445	0.012078	0.025851	0.02769	0.030399	0.033007	0.025534	0.017954	0.032462	0.021283
Fluviibacter phosphoraccumulans	Bacteria	82.7957	0.026715	0.023477	0.011754	0.045481	0.024847	0.019675	0.028103	0.044483	0.014885	0.020847	0.03271	0.014757	0.025953	0.035321	0.028554	0.039534	0.016497
Bifidobacterium scardovii	Bacteria	60.2151	0.026516	0.041241	0.011113	0.009121	0.005767	0.000926	0.003938	0.13363	0.012749	0.042105	0.010588	0.010808	0.108445	0.007377	0.00401	0.020151	0.004928
Bacillus thuringiensis	Bacteria	84.9462	0.026222	0.040826	0.015297	0.045977	0.032745	0.007802	0.032642	0.018645	0.013394	0.022744	0.029776	0.013049	0.035743	0.013183	0.017101	0.033218	0.042587
Streptococcus sp. HSISM1	Bacteria	84.9462	0.026129	0.032246	0.02108	0.022797	0.01293	0.022141	0.040559	0.034355	0.022763	0.033825	0.018264	0.0227	0.030889	0.019311	0.036213	0.012494	0.034097
Streptococcus sp. LPB0220	Bacteria	81.7204	0.025517	0.03221	0.020754	0.020344	0.008368	0.022908	0.042503	0.033996	0.022968	0.033816	0.017038	0.024226	0.031272	0.018752	0.035718	0.009526	0.032684
Faecalibacterium sp. I4179	Bacteria	64.5161	0.025181	0.014774	0.016143	0.02309	0.003736	0.006618	0.041521	0.051089	0.04513	0.02787	0.022434	0.031416	0.023495	0.008036	0.045322	0.006723	0.034341
Geobacillus sp. GHH01	Bacteria	27.957	0.025115	7.8e-05	0.019714	0.012496	0.000413	0.009814	0.074256	0.057971	0.028017	0.024836	0.0254	0.05485	0.020199	0.003348	0.019452	0.039922	0.012057
Prochlorococcus marinus	Bacteria	90.3226	0.025099	0.021949	0.018832	0.035946	0.029519	0.013797	0.047403	0.020001	0.011877	0.022629	0.027623	0.024611	0.027096	0.022502	0.020888	0.032427	0.022716
Actinomyces sp. oral taxon 414	Bacteria	81.7204	0.024977	0.047343	0.021516	0.013201	0.007159	0.030475	0.028723	0.02055	0.0299	0.028042	0.021844	0.023297	0.016276	0.012164	0.021725	0.016444	0.058247
Catenibacterium sp. co_0103	Bacteria	89.2473	0.024717	0.023101	0.012561	0.014424	0.031793	0.020221	0.018809	0.018943	0.055375	0.029109	0.020228	0.041875	0.024361	0.027896	0.020659	0.024097	0.010882
Streptococcus sp. A12	Bacteria	67.7419	0.024251	0.032028	0.014531	0.005894	0.012526	0.063939	0.004452	0.004942	0.052468	0.033942	0.014349	0.028287	0.023765	0.028474	0.030814	0.010032	0.024915
Ralstonia solanacearum	Bacteria	88.172	0.023865	0.019239	0.015596	0.032243	0.012684	0.021627	0.026474	0.04009	0.022942	0.019846	0.027971	0.018951	0.022558	0.018486	0.030015	0.04016	0.012042
Leuconostoc carnosum	Bacteria	62.3656	0.023461	0.026406	0.010651	0.003557	0.01639	0.074518	0.00218	0.004298	0.045954	0.035721	0.010934	0.02987	0.01477	0.026563	0.02975	0.007956	0.032645
Blautia argi	Bacteria	88.172	0.023249	0.027863	0.023093	0.020624	0.021558	0.014737	0.016181	0.015729	0.045556	0.027199	0.019214	0.029736	0.02091	0.035301	0.028496	0.013021	0.013943
Serratia marcescens	Bacteria	51.6129	0.023226	0.001007	0.166239	0.00912	0.003241	0.007582	0.003314	0.016677	0.001918	0.005301	0.041541	0.004627	0.007434	0.022373	0.000741	0.000423	0.102489
Lysinibacillus fusiformis	Bacteria	77.4194	0.022823	0.117253	0.002766	0.01806	0.014544	0.004318	0.010823	0.00716	0.003013	0.016869	0.028907	0.012333	0.031179	0.004536	0.00715	0.073609	0.00519
Faecalibacterium duncaniae	Bacteria	18.2796	0.02258	0.02671	0.02408	0	0.003677	0.003268	0	0.013053	0.10931	0.014026	0.031321	0.00456	0.022089	0.025848	0.072263	0.004607	0.005397
Rothia dentocariosa	Bacteria	65.5914	0.022383	0.024091	0.044813	0.01505	0.000329	0.009382	0.052933	0.030679	0.00622	0.022772	0.021987	0.034797	0.006919	0.002869	0.013982	0.016157	0.057914
Megasphaera massiliensis	Bacteria	67.7419	0.022318	0.01891	0.010293	0.025826	0.011221	0.003345	0.053905	0.041326	0.013295	0.024845	0.019735	0.038807	0.014248	0.006618	0.031898	0.013041	0.028362
Streptococcus mitis	Bacteria	82.7957	0.022273	0.034354	0.012352	0.01601	0.008087	0.013553	0.0287	0.046244	0.019229	0.027505	0.016927	0.01346	0.015439	0.014783	0.052473	0.011068	0.024928
Ligilactobacillus salivarius	Bacteria	75.2688	0.022119	0.063665	0.017091	0.013018	0.015996	0.020578	0.011337	0.014752	0.019065	0.015978	0.028394	0.008059	0.066618	0.016776	0.010251	0.008669	0.020797
Anaerotruncus colihominis	Bacteria	74.1935	0.022092	0.003867	0.044485	0.026043	0.005598	0.004895	0.013659	0.073939	0.012303	0.010373	0.034065	0.008268	0.023208	0.016873	0.035086	0.007403	0.040198
Clostridiales bacterium CCNA10	Bacteria	56.9892	0.020871	0.012998	0.012823	0.02346	0.016762	0.008683	0.025889	0.036683	0.029647	0.021474	0.020255	0.029228	0.025611	0.018479	0.025435	0.005975	0.020722
Hungatella hathewayi	Bacteria	78.4946	0.020279	0.008303	0.028925	0.026539	0.005519	0.010218	0.026916	0.025321	0.032351	0.015584	0.025076	0.010866	0.043709	0.018302	0.027171	0.009248	0.01154
Streptococcus intermedius	Bacteria	72.043	0.020274	0.049547	0.004977	0.023609	0.010873	0.004231	0.031107	0.021467	0.013928	0.025995	0.014428	0.028704	0.041844	0.007718	0.026415	0.006421	0.009499
Tenacibaculum sp. SZ-18	Bacteria	35.4839	0.020015	0.036631	0.004328	0.03269	0.003624	0.027522	0.015094	0.023757	0.014173	0.017996	0.022078	0.001182	0.005074	0.025891	0.01826	0.063747	0.005494
Eggerthella guodeyinii	Bacteria	77.4194	0.019695	0.008829	0.030742	0.015341	0.022865	0.014613	0.012694	0.024483	0.030236	0.021108	0.018252	0.028769	0.019325	0.017098	0.019273	0.016868	0.017082
Lachnospira eligens	Bacteria	86.0215	0.019694	0.013271	0.014679	0.024344	0.012716	0.007415	0.015743	0.016327	0.051939	0.021832	0.01751	0.019531	0.019237	0.019938	0.034635	0.012309	0.012534
Anoxybacillus flavithermus	Bacteria	51.6129	0.019179	0.0024	0.01241	0.011662	0.001409	0.005989	0.064365	0.037694	0.017917	0.017266	0.021133	0.047108	0.013832	0.002482	0.013801	0.029107	0.008403
Lawsonibacter asaccharolyticus	Bacteria	56.9892	0.018934	0.0079	0.019467	0.019541	0.004908	0.007005	0.028462	0.053184	0.013951	0.015154	0.022797	0.018333	0.020235	0.011587	0.029872	0.006978	0.025645
Geobacillus stearothermophilus	Bacteria	51.6129	0.018853	0.00069	0.014222	0.009533	0.001612	0.010249	0.056435	0.040392	0.018716	0.018765	0.018943	0.043886	0.014371	0.002677	0.01379	0.028274	0.009663
Streptococcus sp. HSISS3	Bacteria	69.8925	0.018774	0.012801	0.039153	0.00907	0.019158	0.009857	0.013051	0.015329	0.034883	0.020914	0.016588	0.012542	0.032875	0.020144	0.010672	0.011937	0.024257
Prevotella melaninogenica	Bacteria	67.7419	0.018706	0.001226	0.041401	0.008661	0.006895	0.034068	0.013921	0.044457	0.004946	0.012815	0.024725	0.0092	0.020324	0.04828	0.001935	0.004535	0.031064
uncultured Blautia sp.	Bacteria	84.9462	0.01852	0.017606	0.020054	0.020392	0.012615	0.013009	0.011801	0.016755	0.036037	0.020875	0.016114	0.022098	0.019447	0.025785	0.024254	0.008501	0.012168
Xanthobacter autotrophicus	Bacteria	47.3118	0.01796	0.044779	0.000306	0.033479	0.005137	0.002738	0.022998	0.031121	0.001275	0.025331	0.010429	0.004588	0.026113	0.019593	0.008538	0.038798	0.009499
Streptococcus australis	Bacteria	69.8925	0.017666	0.023564	0.009202	0.003926	0.012461	0.041695	0.004831	0.006071	0.037201	0.022924	0.012294	0.01784	0.019043	0.020902	0.02272	0.006546	0.01936
Geobacillus sp. JS12	Bacteria	27.957	0.017585	6.4e-05	0.011541	0.009321	0.000101	0.006173	0.052663	0.045739	0.01642	0.018364	0.01679	0.036985	0.013142	0.001336	0.011813	0.033621	0.007798
Bacteroides faecis	Bacteria	52.6882	0.017254	0.006279	0.01732	0.016291	0.019196	0.037949	0.014763	0.022539	0.004146	0.014167	0.020408	0.020146	0.033745	0.005092	0.010855	0.005696	0.02665
Lactococcus cremoris	Bacteria	54.8387	0.017063	0.002687	0.005169	0.031578	0.070285	0.006289	0.002266	0.005762	0.009548	0.009884	0.024399	0.001322	0.010683	0.003062	0.002472	0.031344	0.050764
Phascolarctobacterium faecium	Bacteria	61.2903	0.01695	0.015905	0.004201	0.039879	0.001761	0.000505	0.034888	0.034352	0.003431	0.019936	0.013898	0.034219	0.015944	0.005797	0.018968	0.00661	0.019843
Sutterella wadsworthensis	Bacteria	44.086	0.016939	0.020092	0.00272	0.042579	0.001114	0.000984	0.029665	0.036055	0.001529	0.012402	0.021575	0.049164	0.016668	0.004582	0.00545	0.002707	0.023534
Streptomyces sp. GMY02	Bacteria	80.6452	0.016721	0.019687	0.011217	0.022445	0.016656	0.018226	0.020946	0.017104	0.006599	0.012952	0.020571	0.00812	0.01633	0.014915	0.023244	0.027846	0.009105
Bacteroides intestinalis	Bacteria	56.9892	0.01639	0.018171	0.004392	0.034101	0.003047	0.0062	0.022172	0.040912	0.002168	0.01515	0.017657	0.031354	0.020343	0.001554	0.011786	0.007394	0.024989
Clostridium sp. C1	Bacteria	65.5914	0.016092	0.005726	0.006497	0.029824	0.020392	0.005822	0.004213	0.008485	0.045545	0.020625	0.011461	0.033896	0.013084	0.01421	0.01622	0.016769	0.003251
Alistipes dispar	Bacteria	59.1398	0.016079	0.007965	0.010696	0.06093	0.00538	0.005573	0.014194	0.018509	0.004687	0.020808	0.011246	0.057242	0.010351	0.005485	0.007367	0.00607	0.011205
Actinomyces sp. oral taxon 171	Bacteria	76.3441	0.016052	0.03195	0.01438	0.009229	0.004405	0.012137	0.022859	0.016571	0.016647	0.017028	0.015055	0.014092	0.010966	0.005072	0.022963	0.010983	0.030739
Butyricimonas virosa	Bacteria	53.7634	0.016011	0.017016	0.009965	0.023977	0.012171	0.012974	0.017774	0.032863	0.001748	0.014789	0.01726	0.033374	0.02745	0.000551	0.00618	0.001196	0.026469
Actinomyces sp. HMT 175	Bacteria	64.5161	0.015546	0.031319	0.029511	0.011253	0.001111	0.004277	0.015863	0.02033	0.013429	0.018257	0.012775	0.021596	0.010395	0.003975	0.034173	0.006064	0.016002
Lactobacillus helveticus	Bacteria	78.4946	0.01531	0.017959	0.009701	0.005815	0.015624	0.037247	0.004513	0.00594	0.023968	0.020438	0.010071	0.014062	0.013417	0.015847	0.016728	0.010127	0.02167
Bifidobacterium animalis	Bacteria	59.1398	0.015221	0.008115	0.003737	0.00105	0.039043	0.002007	0.00056	0.013412	0.051779	0.020501	0.009827	0.019681	0.014595	0.032325	0.001224	0.024821	0.001097
Mycobacterium paragordonae	Bacteria	58.0645	0.015093	0.00505	0.011477	0.013535	0.001642	0.003421	0.014558	0.05157	0.02193	0.019838	0.010245	0.005584	0.014359	0.008188	0.011621	0.042233	0.007117
Lactobacillus paragasseri	Bacteria	33.3333	0.015009	0.000439	0.070978	0.002673	0.016132	0.002837	0.000529	0.009215	0.026115	0.007488	0.022693	0.012874	0.008702	0.016268	0.000491	0.007355	0.044388
Bifidobacterium catenulatum	Bacteria	65.5914	0.01487	0.018423	0.007014	0.010278	0.021382	0.017766	0.005403	0.033629	0.005316	0.012433	0.01736	0.021461	0.019015	0.002958	0.009735	0.025145	0.009827
Bacteroides sp. PHL 2737	Bacteria	10.7527	0.014832	0	0.015817	0.009145	0.010294	0.038649	0.036057	0.008313	0	0.014476	0.015195	0.014531	0.040545	0	0.025284	0	0.006756
Parabacteroides goldsteinii	Bacteria	53.7634	0.014815	0.019741	0.006577	0.018778	0.004079	0.006274	0.018569	0.043965	0.001595	0.015103	0.014521	0.025006	0.021711	0.000722	0.006926	0.004383	0.029018
Bacteroides luhongzhouii	Bacteria	82.7957	0.014768	0.005548	0.011058	0.027432	0.006161	0.013113	0.025876	0.024158	0.004965	0.010589	0.019039	0.013956	0.016379	0.010206	0.022562	0.012805	0.012079
Eubacterium sp. c-25	Bacteria	82.7957	0.01452	0.014386	0.01253	0.010264	0.019726	0.006072	0.007445	0.010138	0.034898	0.017335	0.011643	0.022194	0.013458	0.021751	0.012443	0.010655	0.008001
Prevotella copri	Bacteria	64.5161	0.014445	0.001578	0.002126	0.035123	0.002818	0.015417	0.007866	0.045876	0.005322	0.018096	0.010715	0.006225	0.008898	0.005361	0.00443	0.04023	0.019876
Anoxybacillus gonensis	Bacteria	30.1075	0.014367	5.2e-05	0.009724	0.007772	0.001445	0.004743	0.04848	0.030236	0.013031	0.012961	0.015803	0.035423	0.010776	0.001769	0.009913	0.023104	0.004956
Ralstonia sp. 56D2	Bacteria	45.1613	0.014231	0.002004	0.010602	0.003856	0.001597	0.003976	0.046396	0.019228	0.026001	0.013574	0.014903	0.035918	0.009636	0.000743	0.022627	0.01149	0.004643
Corynebacterium matruchotii	Bacteria	62.3656	0.014145	0.017887	0.014311	0.006868	7.3e-05	0.005702	0.026985	0.040188	0.00334	0.016963	0.011265	0.011219	0.003272	0.001608	0.006322	0.027344	0.033354
Streptococcus oralis	Bacteria	75.2688	0.014108	0.017783	0.011642	0.010505	0.009235	0.005144	0.018252	0.023808	0.016895	0.017177	0.010973	0.01303	0.013101	0.009343	0.026094	0.007823	0.014597
Simiaoa sunii	Bacteria	75.2688	0.013799	0.013253	0.009188	0.009235	0.010876	0.006471	0.009859	0.029233	0.022794	0.017129	0.010396	0.014798	0.010314	0.013483	0.0149	0.021476	0.007846
Clostridium perfringens	Bacteria	84.9462	0.01378	0.021164	0.010927	0.014977	0.017908	0.004994	0.010452	0.011825	0.017356	0.013654	0.013909	0.020624	0.014997	0.010321	0.013388	0.012094	0.011252
Eubacterium maltosivorans	Bacteria	62.3656	0.013751	0.008629	0.021298	0.022831	0.011455	0.009996	0.012367	0.012738	0.011866	0.013335	0.014175	0.023273	0.015866	0.012529	0.016869	0.010631	0.003779
Blautia pseudococcoides	Bacteria	82.7957	0.013668	0.01196	0.010876	0.008493	0.016632	0.010101	0.007466	0.010326	0.032744	0.017295	0.009962	0.019684	0.01165	0.022513	0.015075	0.007968	0.006598
Faecalibacterium sp. I3333	Bacteria	56.9892	0.013638	0.007104	0.005848	0.013864	0.004742	0.001221	0.025575	0.030845	0.020043	0.015308	0.011932	0.019087	0.010171	0.003101	0.025618	0.003398	0.019479
Chryseobacterium sp. 3008163	Bacteria	68.8172	0.013365	0.017869	0.006345	0.024027	0.009929	0.010454	0.020732	0.009182	0.006868	0.010756	0.016032	0.009429	0.010123	0.00987	0.015369	0.027568	0.007151
Pauljensenia hongkongensis	Bacteria	72.043	0.013341	0.021005	0.007362	0.005113	0.00668	0.023383	0.008758	0.00691	0.025988	0.016641	0.00997	0.009734	0.015248	0.008886	0.015567	0.007178	0.022654
Burkholderia pseudomallei	Bacteria	87.0968	0.013239	0.012993	0.008188	0.01812	0.011242	0.011874	0.015036	0.021617	0.006697	0.011844	0.014664	0.007578	0.009632	0.019483	0.017558	0.017467	0.008141
Bradyrhizobium erythrophlei	Bacteria	92.4731	0.01298	0.011763	0.007352	0.019214	0.013657	0.008839	0.018645	0.016859	0.006898	0.01299	0.01297	0.009286	0.00736	0.016282	0.010035	0.020162	0.014937
Alistipes senegalensis	Bacteria	52.6882	0.012913	0.008685	0.009617	0.031215	0.002796	0.001622	0.018091	0.026821	0.005065	0.009853	0.016039	0.027366	0.012201	0.004985	0.013794	0.002549	0.016494
Shigella boydii	Bacteria	25.8065	0.012893	2.4e-05	0.039857	0.006499	0.021883	0.0039	0.028835	0.003638	0.002232	0.002522	0.02349	0.00422	0.002248	0.043137	0.002836	0.026982	0.001174
Rothia mucilaginosa	Bacteria	65.5914	0.012861	0.010718	0.018957	0.026932	0.005387	0.001337	0.013348	0.015452	0.011987	0.016878	0.008757	0.031158	0.016076	0.005984	0.013085	0.007639	0.003506
Faecalibacterium sp. HTFF	Bacteria	63.4409	0.012767	0.003646	0.009089	0.011217	0.002916	0.002393	0.009587	0.021861	0.041573	0.012668	0.012869	0.007849	0.015031	0.004602	0.03327	0.007997	0.006525
Lactococcus piscium	Bacteria	54.8387	0.012725	0.016543	0.012748	0.003567	0.01093	0.015239	0.003519	0.002395	0.035999	0.014903	0.010499	0.008213	0.016701	0.012318	0.016622	0.006419	0.015743
Anoxybacillus kamchatkensis	Bacteria	31.1828	0.012704	0.000483	0.006985	0.007234	3.3e-05	0.004048	0.041239	0.026749	0.01508	0.012141	0.01328	0.028881	0.010592	0.002528	0.008636	0.018742	0.006586
Borrelia crocidurae	Bacteria	69.8925	0.012565	0.005864	0.037064	0.013074	0.006547	0.010356	0.012121	0.012198	0.007348	0.016395	0.008652	0.029036	0.004136	0.011498	0.012682	0.011969	0.006964
Bacteroides sp. HF-162	Bacteria	46.2366	0.012218	0.002172	0.009306	0.025145	0.01116	0.016104	0.009752	0.015309	0.008569	0.014128	0.010267	0.017789	0.017926	0.003881	0.010681	0.009239	0.013099
Bacteroides eggerthii	Bacteria	65.5914	0.012101	0.002984	0.008951	0.024511	0.003312	0.015601	0.016787	0.018617	0.006059	0.011871	0.012335	0.009466	0.010678	0.009216	0.014805	0.011955	0.015959
Abiotrophia defectiva	Bacteria	60.2151	0.01201	0.019023	0.004682	0.004776	0.003684	0.022063	0.017981	0.009364	0.013066	0.016704	0.007214	0.008518	0.007358	0.009738	0.023374	0.002667	0.019903
Citrobacter freundii	Bacteria	60.2151	0.012004	0.002887	0.030337	0.006505	0.016553	0.018796	0.008189	0.012454	0.003402	0.007305	0.016805	0.01245	0.019633	0.013079	0.006586	0.0118	0.008636
Roseburia sp. NSJ-69	Bacteria	78.4946	0.011975	0.015502	0.010612	0.003983	0.008584	0.007101	0.010877	0.008417	0.030199	0.012864	0.011067	0.011989	0.010977	0.013656	0.020685	0.005918	0.008836
Streptococcus constellatus	Bacteria	39.7849	0.011838	0.005774	0.003628	0.011932	0.030656	0.004998	0.00585	0.005946	0.024062	0.008921	0.014819	0.028443	0.009485	0.008956	0.010089	0.001461	0.013271
Streptococcus sp. HSISS2	Bacteria	60.2151	0.011804	0.005638	0.018495	0.006734	0.009641	0.006576	0.013132	0.014122	0.0214	0.012904	0.01068	0.006788	0.019022	0.012495	0.01097	0.009727	0.011593
Pseudomonas sp. CFSAN084952	Bacteria	17.2043	0.011695	2.3e-05	0.001597	0.020106	0.06442	7e-06	0.000193	0.000329	0.004253	0.005007	0.018528	0.00011	0.001115	7.8e-05	5.5e-05	0.019999	0.046636
Treponema denticola	Bacteria	77.4194	0.011691	0.015859	0.006941	0.020717	0.010249	0.011106	0.012049	0.011009	0.004748	0.009699	0.013726	0.007535	0.011878	0.015198	0.008472	0.018727	0.008514
Granulicatella adiacens	Bacteria	72.043	0.011264	0.026407	0.005153	0.007551	0.003567	0.005857	0.023058	0.008226	0.009026	0.014884	0.007566	0.014615	0.017845	0.004679	0.015417	0.004229	0.010187
Fusobacterium ulcerans	Bacteria	41.9355	0.011245	0.024359	0.00107	0.012021	2.8e-05	0.000185	0.019523	0.031835	0.000958	0.011852	0.010625	0.012747	0.019126	0.000231	0.012118	0.00143	0.020536
Lactobacillus crispatus	Bacteria	61.2903	0.011158	0.000861	0.019927	0.003607	0.012682	0.009943	0.01382	0.005785	0.023653	0.014	0.008254	0.00674	0.013741	0.01459	0.010524	0.003347	0.018158
Geobacillus kaustophilus	Bacteria	23.6559	0.011145	3.3e-05	0.008974	0.006197	7.8e-05	0.004076	0.028972	0.033276	0.009035	0.012091	0.010178	0.021294	0.009014	0.001433	0.007976	0.022698	0.003874
Shigella sonnei	Bacteria	21.5054	0.010763	7e-06	0.028757	0.008099	0.018931	0.001658	0.020549	0.009297	0.001685	0.001499	0.020228	0.002709	0.003617	0.033508	0.00649	0.018683	0.001911
Bacteroides caecimuris	Bacteria	58.0645	0.010624	0.003784	0.008109	0.020954	0.005344	0.01558	0.014918	0.013805	0.002347	0.008666	0.012625	0.012678	0.013229	0.006501	0.012825	0.005	0.013125
Streptomyces sp. ICC4	Bacteria	75.2688	0.010611	0.010333	0.006223	0.019125	0.012189	0.007736	0.00839	0.006374	0.013437	0.016135	0.004968	0.008214	0.005928	0.005379	0.004547	0.010379	0.028417
Parabacteroides sp. CT06	Bacteria	30.1075	0.010604	0.00752	0.007319	0.028776	0.003051	0.011227	0.007586	0.014516	0.004619	0.014809	0.006309	0.030238	0.016113	0.001991	0.00394	0.003746	0.007749
Streptococcus gordonii	Bacteria	64.5161	0.010485	0.009753	0.010403	0.012903	0.002482	0.010594	0.014442	0.011511	0.01186	0.013207	0.007703	0.01439	0.006838	0.006929	0.020104	0.005905	0.00854
Kinneretia sp. DAIF2	Bacteria	84.9462	0.010328	0.011409	0.008305	0.019723	0.011043	0.006058	0.013277	0.008257	0.00404	0.010494	0.010158	0.007055	0.00661	0.014319	0.009641	0.012448	0.012188
Venatorbacter cucullus	Bacteria	80.6452	0.01022	0.007707	0.007269	0.014534	0.022522	0.007374	0.011152	0.007104	0.003347	0.009756	0.010694	0.003819	0.011244	0.007166	0.007323	0.019403	0.011583
Streptococcus sp. HSISS1	Bacteria	34.4086	0.010203	0.004677	0.012402	0.015049	0.008391	0.006499	0.009819	0.008091	0.016883	0.009542	0.010878	0.008595	0.014937	0.017076	0.010815	0	0.010551
Ralstonia mannitolilytica	Bacteria	39.7849	0.010128	0.002833	0.008534	0.002928	0.000782	0.002873	0.031016	0.015024	0.017173	0.009885	0.010375	0.0235	0.006949	0.000628	0.016223	0.00956	0.003553
Vibrio metschnikovii	Bacteria	20.4301	0.010124	0.006868	0.033431	0.001717	3.3e-05	0.041067	7.9e-05	0	0.00084	0.018459	0.001608	6.5e-05	2.6e-05	0.037224	0.000269	0.020688	0.005231
Alistipes megaguti	Bacteria	58.0645	0.009969	0.006155	0.008928	0.022464	0.005735	0.004629	0.010771	0.01893	0.002716	0.008215	0.011762	0.020709	0.011936	0.003897	0.008502	0.002199	0.012486
Collinsella stercoris	Bacteria	67.7419	0.009909	0.011404	0.009604	0.009683	0.011283	0.007776	0.011581	0.009342	0.008502	0.008238	0.011617	0.012296	0.01784	0.006945	0.009954	0.004975	0.007222
Arachnia propionica	Bacteria	66.6667	0.009825	0.01598	0.005625	0.002371	0.006017	0.016254	0.007731	0.001861	0.021395	0.011878	0.007727	0.006517	0.011284	0.007455	0.01353	0.00436	0.015301
Streptococcus cristatus	Bacteria	62.3656	0.009823	0.014742	0.004004	0.006751	0.001876	0.011748	0.016884	0.015713	0.006388	0.011992	0.007607	0.006968	0.005131	0.006007	0.022696	0.002555	0.014926
Streptococcus sanguinis	Bacteria	77.4194	0.009809	0.012467	0.010338	0.003518	0.005903	0.0143	0.006423	0.010651	0.01503	0.012899	0.006652	0.008415	0.008356	0.011727	0.014137	0.006796	0.009574
Faecalibacterium sp. I3389	Bacteria	61.2903	0.00975	0.007036	0.006998	0.006286	0.003018	0.001845	0.009009	0.015292	0.028522	0.010436	0.009049	0.00533	0.013971	0.004677	0.021325	0.005689	0.0066
Eubacterium sp. NSJ-61	Bacteria	74.1935	0.009705	0.010861	0.005244	0.005579	0.016107	0.006524	0.004269	0.00746	0.020667	0.010454	0.00894	0.016533	0.009254	0.011309	0.006927	0.009518	0.005317
Streptococcus ilei	Bacteria	62.3656	0.009658	0.013791	0.006359	0.003475	0.003013	0.01951	0.004305	0.003541	0.022213	0.012318	0.006941	0.011942	0.012342	0.007511	0.01346	0.003489	0.00908
Enterococcus sp. FDAARGOS_553	Bacteria	11.828	0.009623	0	0.000632	0.000663	0.025321	0.001018	0.000119	0.010934	0.036906	0.010369	0.00886	0.017809	0.008739	0.020837	8.9e-05	0.012175	0
Raoultibacter timonensis	Bacteria	72.043	0.009539	0.005032	0.017313	0.005379	0.008754	0.003679	0.007485	0.009271	0.020673	0.008577	0.010522	0.011491	0.010163	0.009647	0.008424	0.00479	0.012854
Lacticaseibacillus paracasei	Bacteria	50.5376	0.009449	0.026023	0.005779	0.006104	0.001398	0.002886	0.014067	0.014082	0.005024	0.010601	0.008271	0.002946	0.008668	0.002227	0.023594	0.007873	0.010075
Corynebacterium aurimucosum	Bacteria	40.8602	0.009362	0.014574	0.001534	0.003124	0.001729	0.0001	0.001247	0.050814	0.003928	0.015177	0.003421	0.002381	0.040676	0.001994	0.001087	0.007295	0.001384
Acinetobacter baumannii	Bacteria	65.5914	0.009315	0.003144	0.004405	0.008893	0.004943	0.003274	0.027183	0.018838	0.003815	0.005008	0.013715	0.005146	0.005808	0.004251	0.006088	0.012767	0.020938
Pseudomonas frederiksbergensis	Bacteria	72.043	0.009175	0.007674	0.003048	0.017231	0.003842	0.004412	0.02417	0.003599	0.007935	0.00828	0.010089	0.005587	0.011967	0.004159	0.006683	0.018671	0.007129
Streptococcus mutans	Bacteria	64.5161	0.009154	0.003589	0.015074	0.008927	0.006029	0.002784	0.005496	0.008844	0.023447	0.011148	0.007116	0.009963	0.011155	0.01179	0.005438	0.008336	0.00862
Clostridiaceae bacterium Marseille-Q4149	Bacteria	58.0645	0.009035	0.015341	0.002689	0.005193	0.016602	0.000771	0.007536	0.006446	0.016425	0.008751	0.009324	0.015863	0.008387	0.008688	0.008447	0.005395	0.007811
Escherichia fergusonii	Bacteria	56.9892	0.008996	0.000652	0.027656	0.004694	0.012712	0.005012	0.016805	0.002635	0.00438	0.003024	0.015098	0.002574	0.003813	0.024178	0.003543	0.018483	0.00288
Klebsiella variicola	Bacteria	67.7419	0.008716	0.001595	0.017832	0.00415	0.007676	0.014953	0.001047	0.023798	0.001449	0.007348	0.010112	0.007445	0.018027	0.007735	0.001472	0.008358	0.009054
Arachnia rubra	Bacteria	48.3871	0.008551	0.013675	0.004684	0.011818	9e-06	0.001655	0.025352	0.008743	0.001843	0.004964	0.012216	0.009946	0.00154	0.000508	0.003518	0.004375	0.0305
Bacteroides sp. KGMB10229	Bacteria	31.1828	0.008518	0.001646	0.00751	0.021307	0.001213	0.028834	0.00119	0.002758	0.003035	0.010066	0.006936	0.005465	0.010144	1.6e-05	0.000935	0.020234	0.013058
Schaalia meyeri	Bacteria	56.9892	0.008429	0.014943	0.005772	0.002116	0.001399	0.011396	0.001104	0.015421	0.015419	0.012873	0.003888	0.004629	0.019115	0.00666	0.009248	0.004677	0.005785
Erysipelotrichaceae bacterium I46	Bacteria	24.7312	0.008336	0.003727	0.005986	0.002482	0.012235	0.006946	0.003427	0.001378	0.029536	0.007863	0.00882	0.015601	0.006731	0.011526	0.004432	0.005715	0.006864
Aeromonas caviae	Bacteria	30.1075	0.008329	0.019746	0.014189	0.007273	1.8e-05	0.007519	0.002084	9.6e-05	0.016002	0.015078	0.001434	0.000333	0.000593	0.024315	0.00599	0.004133	0.016111
Streptococcus sp. CNU G2	Bacteria	27.957	0.008263	0.019519	4.4e-05	0.01282	0.017869	0.011393	0.00013	0.000396	0.001906	0.005684	0.010897	0.013935	0.006746	0.00118	0.000255	0.017377	0.009552
Thermoleptolyngbya sp. PKUAC-SCTB121	Bacteria	53.7634	0.008209	0.00566	0.004318	0.012535	0.008875	0.001473	0.022176	0.009428	0.00066	0.009827	0.006556	0.014362	0.003771	0.013999	0.001666	0.009969	0.006595
Tannerella forsythia	Bacteria	49.4624	0.008199	0.001076	0.000367	0.042222	0.000151	0.000766	0.005512	0.013873	0.000792	0.015424	0.000816	0.000338	0.004392	0.000313	0.040992	0.000955	0.000726
Alistipes indistinctus	Bacteria	58.0645	0.008158	0.002879	0.01123	0.015146	0.001466	0.002997	0.008353	0.023624	0.00137	0.004462	0.011935	0.006589	0.006405	0.007208	0.011695	0.004102	0.012732
Escherichia albertii	Bacteria	61.2903	0.007945	0.001157	0.023544	0.004504	0.012163	0.004192	0.01337	0.002489	0.004284	0.002834	0.013166	0.002463	0.003751	0.021603	0.002529	0.01658	0.002106
Bacteroides sp. CBA7301	Bacteria	53.7634	0.007938	0.002947	0.005963	0.01269	0.003544	0.010101	0.013005	0.012481	0.002821	0.00592	0.01	0.007176	0.010576	0.00473	0.010479	0.004285	0.009932
Curtobacterium flaccumfaciens	Bacteria	36.5591	0.007926	5.3e-05	0.00066	0.010081	1.4e-05	0.000799	0.005883	0.037664	0.00952	0.01193	0.003835	0.001997	0.007196	0.000206	0.006717	0.027821	0.002283
Streptococcus sp. FDAARGOS_192	Bacteria	51.6129	0.0079	0.003418	0.016164	0.002855	0.000821	0.001809	0.012659	0.006899	0.019867	0.010967	0.004766	0.00305	0.01229	0.010277	0.007415	0.003886	0.010475
Novisyntrophococcus fermenticellae	Bacteria	66.6667	0.007854	0.011211	0.005886	0.004144	0.007213	0.002621	0.00457	0.005066	0.021563	0.008899	0.006786	0.008072	0.00744	0.012244	0.010353	0.005166	0.004413
Staphylococcus condimenti	Bacteria	70.9677	0.007804	0.009356	0.011452	0.013961	0.002919	0.005058	0.004516	0.013481	0.00277	0.008199	0.007401	0.007675	0.006236	0.012253	0.005098	0.011199	0.004913
Streptococcus suis	Bacteria	80.6452	0.007747	0.006293	0.006335	0.010791	0.007099	0.002941	0.011688	0.00696	0.009571	0.006514	0.009008	0.010286	0.009678	0.006535	0.005897	0.006604	0.007492
Butyricimonas faecalis	Bacteria	54.8387	0.007698	0.00499	0.003522	0.016845	0.004252	0.012193	0.005192	0.012883	0.001443	0.007864	0.007528	0.012194	0.011843	0.002894	0.002501	0.004474	0.011962
Leuconostoc gelidum	Bacteria	56.9892	0.007694	0.001759	0.016903	0.006149	0.00252	0.004368	0.00472	0.009086	0.017699	0.010079	0.005257	0.007047	0.007678	0.013124	0.007002	0.006413	0.005539
Wujia chipingensis	Bacteria	65.5914	0.007629	0.011297	0.005513	0.003506	0.006219	0.001744	0.00576	0.010067	0.016779	0.00906	0.006168	0.005688	0.00662	0.011014	0.010368	0.007597	0.004792
Streptomyces sp. ICC1	Bacteria	68.8172	0.007612	0.002975	0.002883	0.01221	0.013232	0.001471	0.012472	0.013499	0.001852	0.007189	0.008043	0.010139	0.005166	0.005147	0.002328	0.013413	0.009327
Fannyhessea vaginae	Bacteria	23.6559	0.007546	0.000317	8e-05	7.3e-05	9e-06	9.5e-05	0.000104	6.9e-05	0.057753	0.014875	5.7e-05	0.000266	0.000105	2e-05	0.043281	3.7e-05	0.000169
Coprococcus sp. ART55/1	Bacteria	54.8387	0.007421	0.005066	0.004056	0.003886	0.002088	0.001297	0.007607	0.016371	0.019186	0.009993	0.004794	0.005126	0.006306	0.006981	0.005853	0.010372	0.009692
Campylobacter jejuni	Bacteria	54.8387	0.007352	0.009168	0.006163	0.00372	0.004896	0.003317	0.003636	0.003977	0.023456	0.00673	0.007987	0.005448	0.009037	0.010313	0.014646	0.002619	0.002298
Gemella haemolysans	Bacteria	51.6129	0.007295	0.017193	0.003296	0.006097	0.000508	0.00241	0.018029	0.008115	0.002115	0.008786	0.005772	0.003992	0.006928	0.001061	0.018195	0.00282	0.00979
Ralstonia insidiosa	Bacteria	74.1935	0.007249	0.003008	0.004043	0.00781	0.003429	0.003022	0.01795	0.008372	0.009913	0.006308	0.00821	0.012645	0.004418	0.006384	0.008157	0.006953	0.005163
Cedecea neteri	Bacteria	73.1183	0.007239	0.007222	0.007803	0.009463	0.006616	0.00574	0.010585	0.008623	0.002072	0.004867	0.009663	0.004034	0.006235	0.009985	0.006394	0.012096	0.004835
Prevotella intermedia	Bacteria	52.6882	0.00721	0.004341	0.007991	0.009762	0.009907	0.004159	0.003674	0.000984	0.016475	0.00963	0.004738	0.000916	0.015279	0.002911	0.008899	0.002877	0.011449
Barnesiella viscericola	Bacteria	51.6129	0.007168	0.002175	0.009105	0.013026	0.006307	0.012134	0.005022	0.008565	0.001446	0.007056	0.007282	0.014062	0.010379	0.003459	0.002878	0.0024	0.009796
Acinetobacter junii	Bacteria	32.2581	0.007162	0.002973	0.000333	0.000582	5.3e-05	0.009669	0.000588	0.000714	0.040713	0.000245	0.01423	0.000576	0.00031	0.035061	0.000182	0.009631	0.00029
Streptococcus sp. CNU G3	Bacteria	36.5591	0.007156	0.018729	1.7e-05	0.009524	0.021903	0.001371	0.000887	0.000528	0.002547	0.003915	0.010468	0.015813	0.00686	0.002163	0.001197	0.010421	0.0064
Veillonella parvula	Bacteria	59.1398	0.007116	0.003289	0.008351	0.004464	0.003857	0.002791	0.012347	0.0179	0.005036	0.007456	0.006769	0.005806	0.004446	0.003621	0.012644	0.005828	0.009834
Desulfuromonas soudanensis	Bacteria	79.5699	0.007091	0.008093	0.006237	0.012415	0.005109	0.00581	0.008734	0.007246	0.002953	0.006863	0.007323	0.009417	0.005534	0.006444	0.007023	0.006166	0.008025
Nostoc sp. CENA543	Bacteria	77.4194	0.006956	0.005571	0.012218	0.008525	0.008952	0.004015	0.005641	0.006363	0.005192	0.007542	0.006357	0.012282	0.003097	0.004368	0.006038	0.010324	0.005638
Kurthia sp. 11kri321	Bacteria	21.5054	0.006888	4.1e-05	0.001388	0.009141	0.040027	9e-06	2.9e-05	0.000353	0.002658	0.002191	0.011688	2.2e-05	0.00108	2.8e-05	2.7e-05	0.010049	0.028837
Actinomyces viscosus	Bacteria	65.5914	0.006825	0.013944	0.004618	0.003485	0.001287	0.006776	0.006531	0.004311	0.01307	0.008128	0.005493	0.004836	0.007188	0.002592	0.01018	0.003844	0.011656
Amedibacterium intestinale	Bacteria	62.3656	0.006707	0.008453	0.003334	0.008527	0.007894	0.003459	0.00634	0.005989	0.009039	0.005394	0.008049	0.00787	0.006411	0.007206	0.008136	0.004528	0.006228
Gemella morbillorum	Bacteria	59.1398	0.006617	0.011151	0.00269	0.00256	0.003705	0.013737	0.003112	0.005934	0.009333	0.008953	0.004229	0.006589	0.006146	0.006008	0.010997	0.002628	0.007255
Streptococcus sp. CNU 77-61	Bacteria	30.1075	0.006519	0.011366	2.7e-05	0.010095	0.024104	0.002209	0.001179	7.9e-05	0.001477	0.002232	0.0109	0.015549	0.000466	0.000874	0.001046	0.012639	0.008401
Bacillus subtilis	Bacteria	47.3118	0.006512	0.001583	0.049379	0.002227	0.002112	0.00071	0.000738	0.000301	0.001677	0.011293	0.001627	0.001818	0.00176	0.001144	0.000876	0.001613	0.030897
Clostridium neonatale	Bacteria	82.7957	0.006502	0.00878	0.007263	0.007197	0.006132	0.003515	0.005064	0.005509	0.008597	0.006796	0.006201	0.006426	0.004295	0.005338	0.006685	0.006902	0.009214
Lactobacillus acidophilus	Bacteria	32.2581	0.006479	7.9e-05	0.000791	0.003151	0.00026	0.000177	0.007728	0.040053	0.001441	0.011785	0.001058	0.000557	0.003631	8.4e-05	0.001312	0.031865	0.000254
Mogibacterium pumilum	Bacteria	50.5376	0.006452	0.011721	0.003677	0.002312	0.001231	0.001459	0.00185	0.024529	0.005882	0.010194	0.002629	0.001917	0.022363	0.002901	0.003724	0.005079	0.002003
Geobacillus thermocatenulatus	Bacteria	35.4839	0.00637	0.000126	0.004146	0.002934	0.003069	0.002364	0.019976	0.010014	0.008261	0.005544	0.007213	0.014919	0.004318	0.000705	0.004352	0.011415	0.002335
[Bacillus] caldolyticus	Bacteria	21.5054	0.006214	1.5e-05	0.005272	0.003593	3.9e-05	0.003193	0.021638	0.008603	0.007403	0.005134	0.007318	0.016225	0.006301	0.000827	0.005573	0.005238	0.003074
Bifidobacterium pullorum	Bacteria	51.6129	0.006182	0.013453	0.001692	0.003237	0.024386	0.002033	0.000791	0.000625	0.002025	0.00291	0.009524	0.019414	0.004261	0.001213	0.002322	0.00771	0.002377
Eggerthella sp. YY7918	Bacteria	54.8387	0.006073	0.002025	0.010787	0.002951	0.006414	0.006422	0.001349	0.00635	0.013096	0.00631	0.005831	0.009065	0.005549	0.006346	0.003623	0.006432	0.005645
Spirosoma sp. KCTC 42546	Bacteria	77.4194	0.005979	0.006705	0.006792	0.009742	0.007367	0.004675	0.007303	0.004135	0.001092	0.006128	0.005826	0.006257	0.005545	0.005927	0.006384	0.007212	0.004558
Pantoea sp. SO10	Bacteria	27.957	0.005954	2e-05	0.00168	0.009314	0.032431	2e-05	0.000178	0.000328	0.00248	0.002243	0.009746	0.000131	0.00125	3.1e-05	2.3e-05	0.010173	0.023011
Turicibacter sanguinis	Bacteria	53.7634	0.005912	0.001548	0.014839	0.001262	0.000458	0.000667	0.006304	0.003712	0.019809	0.007248	0.004547	0.00397	0.008203	0.010385	0.005143	0.002056	0.006152
Dialister pneumosintes	Bacteria	38.7097	0.005898	0.00232	0.002048	0.008359	0.001066	0.000656	0.012554	0.016121	0.004267	0.00518	0.006632	0.000175	0.007203	0.007238	0.013083	0.004973	0.002525
Dickeya dadantii	Bacteria	74.1935	0.005834	0.00375	0.001529	0.009676	0.011565	0.006512	0.00499	0.00412	0.003666	0.006712	0.004935	0.003847	0.004807	0.006338	0.006855	0.010481	0.002611
Delftia lacustris	Bacteria	18.2796	0.005818	0.004989	0.012678	2.8e-05	7e-06	0.02856	7e-05	0.000304	0.000591	0.010066	0.001477	3.2e-05	1.7e-05	0.024631	0.000117	0.008415	0.003686
Geobacillus sp. C56-T3	Bacteria	25.8065	0.005812	3.3e-05	0.003303	0.004655	3.4e-05	0.002017	0.014974	0.018117	0.003973	0.006131	0.005486	0.010735	0.004756	0.000356	0.003437	0.013688	0.001527
Chamaesiphon minutus	Bacteria	76.3441	0.005764	0.005667	0.005384	0.009309	0.006066	0.002238	0.010785	0.003976	0.002478	0.00563	0.005901	0.0058	0.005183	0.006684	0.003444	0.005949	0.007642
Clostridium sp. SY8519	Bacteria	75.2688	0.005696	0.006683	0.005701	0.002498	0.004279	0.003055	0.006416	0.004027	0.012772	0.006519	0.004855	0.004483	0.006235	0.007746	0.007508	0.003125	0.005259
Phocaeicola salanitronis	Bacteria	80.6452	0.005665	0.00314	0.003082	0.01107	0.004159	0.00701	0.005317	0.008143	0.003173	0.004748	0.006601	0.007665	0.0072	0.003923	0.003673	0.00468	0.006755
Corynebacterium accolens	Bacteria	32.2581	0.005663	0.010001	0.001388	0.001316	0.001793	8.2e-05	0.000766	0.028263	0.002867	0.009078	0.002174	0.000838	0.023527	0.001401	0.000329	0.006184	0.000865
Phocaeicola coprophilus	Bacteria	54.8387	0.005452	0.001784	0.006397	0.006994	0.005821	0.013586	0.001808	0.005557	0.001837	0.004504	0.006421	0.007029	0.010087	0.002015	0.002385	0.002489	0.008378
Lactobacillus johnsonii	Bacteria	44.086	0.005441	0.000392	0.001459	0.003203	0.000976	0.000259	0.001812	0.035046	0.002187	0.008788	0.002021	0.00122	0.002902	0.000379	0.001541	0.024385	0.001324
Qiania dongpingensis	Bacteria	61.2903	0.005431	0.006604	0.004184	0.003942	0.006445	0.003301	0.003374	0.003717	0.011528	0.005995	0.004854	0.009049	0.004777	0.007299	0.006014	0.002861	0.003045
Intestinimonas butyriciproducens	Bacteria	59.1398	0.005353	0.003839	0.004268	0.005697	0.003465	0.000636	0.006333	0.008555	0.010114	0.004472	0.006253	0.00424	0.006376	0.005336	0.008055	0.001304	0.006733
Streptococcus pyogenes	Bacteria	46.2366	0.00534	0.007272	0.002812	0.005325	0.01267	0.002722	0.003394	0.002525	0.005341	0.003924	0.006786	0.012089	0.004119	0.002403	0.003689	0.004369	0.005425
Lacrimispora sphenoides	Bacteria	60.2151	0.005329	0.003884	0.00525	0.007867	0.005061	0.001176	0.004614	0.005524	0.009258	0.005745	0.004904	0.007914	0.004844	0.007681	0.007084	0.002086	0.00282
Bacillus mycoides	Bacteria	78.4946	0.005282	0.004461	0.002164	0.009981	0.009931	0.003615	0.004709	0.002778	0.003891	0.003355	0.007251	0.002791	0.003139	0.00709	0.002869	0.006525	0.00935
Geobacillus sp. Y412MC52	Bacteria	24.7312	0.005227	0.00051	0.004343	0.002105	0.000508	0.002236	0.015858	0.011785	0.004866	0.00526	0.005192	0.011302	0.003629	0.000356	0.004815	0.008485	0.002542
Streptococcus koreensis	Bacteria	50.5376	0.005118	0.006882	0.003791	0.002996	0.002954	0.008249	0.001248	0.001939	0.012399	0.00632	0.003889	0.00524	0.006058	0.004649	0.007722	0.002504	0.004483
Blautia liquoris	Bacteria	63.4409	0.005098	0.007028	0.00442	0.002546	0.005501	0.001925	0.003201	0.002788	0.013067	0.006171	0.004001	0.005857	0.004548	0.00777	0.007375	0.002272	0.003145
Streptococcus milleri	Bacteria	39.7849	0.005078	0.001778	0.010966	0.000763	0.00178	0.00079	0.003275	0.007738	0.014739	0.006803	0.003315	0.003583	0.009516	0.007562	0.003609	0.001663	0.004753
Streptomyces armeniacus	Bacteria	56.9892	0.005052	0.005681	0.000208	0.004786	0.007693	0.000592	0.014798	0.002416	0.003217	0.006683	0.003387	0.001676	0.003079	0.004406	0.003411	0.016135	0.001314
Enterococcus raffinosus	Bacteria	49.4624	0.005021	0.012981	9.9e-05	0.004933	0.017919	0.000555	0.000581	8.4e-05	0.001781	0.001962	0.008145	0.014385	0.003259	0.001025	0.000541	0.007927	0.003072
Paraclostridium bifermentans	Bacteria	61.2903	0.005007	0.000739	0.013916	0.002087	0.000213	0.003309	0.002493	0.002707	0.015884	0.006473	0.003509	0.004628	0.005843	0.011886	0.00193	0.002717	0.003873
Stenotrophomonas maltophilia	Bacteria	59.1398	0.004993	0.002752	0.008031	0.007625	0.001979	0.009307	0.004027	0.003198	0.003381	0.00735	0.002584	0.00351	0.003283	0.010702	0.001768	0.006934	0.004381
Leptospira santarosai	Bacteria	60.2151	0.00499	0.002584	0.00144	0.001257	0.003742	0.010901	0.000902	0.017733	0.00183	0.006069	0.003888	0.001946	0.003057	0.008097	0.009097	0.005972	0.001968
Anaerostipes rhamnosivorans	Bacteria	78.4946	0.004987	0.004843	0.006731	0.005026	0.00333	0.00317	0.004057	0.004651	0.008352	0.005102	0.00487	0.004963	0.004624	0.00584	0.00572	0.005045	0.003836
Turicibacter sp. H121	Bacteria	55.914	0.004969	0.005628	0.001764	0.005352	0.003202	0.011006	0.001676	0.007453	0.003347	0.004013	0.005946	0.004386	0.010468	0.003638	0.002123	0.003979	0.005019
Theileria orientalis	Bacteria	51.6129	0.004966	0.001951	0.000429	0.003454	0.008646	0.00102	0.004412	0.019833	0.000465	0.003694	0.006265	0.004656	0.001415	0.016554	0.000984	0.006655	0.00096
Dysosmobacter sp. Marseille-Q4140	Bacteria	52.6882	0.004956	0.001577	0.003898	0.004236	0.007232	0.001251	0.002151	0.006337	0.012904	0.005768	0.004126	0.008694	0.005749	0.00654	0.002733	0.004815	0.001636
Corynebacterium segmentosum	Bacteria	40.8602	0.004866	0.008308	0.001337	0.001617	0.001065	3e-06	0.002266	0.023134	0.002134	0.007479	0.002197	0.00056	0.020032	0.001135	0.000617	0.004146	0.001971
Schaalia cardiffensis	Bacteria	51.6129	0.004862	0.008311	0.003888	0.001292	0.001875	0.011005	0.00016	0.001983	0.009976	0.007347	0.002322	0.003598	0.004899	0.004812	0.00748	0.003079	0.005217
Coprococcus eutactus	Bacteria	54.8387	0.004814	0.00549	0.00358	0.001922	0.002308	0.002036	0.004598	0.007108	0.011459	0.006387	0.003208	0.00366	0.004026	0.006043	0.006913	0.003933	0.004393
Christensenella minuta	Bacteria	54.8387	0.00476	0.005073	0.002077	0.002425	0.008473	0.001186	0.003536	0.003507	0.011248	0.004418	0.005109	0.008942	0.003608	0.005555	0.003335	0.00423	0.003249
Vibrio navarrensis	Bacteria	61.2903	0.004754	0.007066	0.002788	0.006886	0.00319	0.005652	0.005397	0.004608	0.002104	0.004439	0.005075	0.004618	0.004562	0.005748	0.006947	0.004274	0.00249
Komagataeibacter rhaeticus	Bacteria	11.828	0.004733	0	0.001405	0	0.003823	0.013978	0	0.018989	0.000301	0.006605	0.00282	0.001824	0.002028	0.008856	0.011644	0.002594	0.001785
Escherichia marmotae	Bacteria	39.7849	0.004729	0.000227	0.014147	0.003039	0.007213	0.002314	0.007985	0.001667	0.002557	0.001626	0.0079	0.001253	0.001994	0.013013	0.001626	0.009842	0.001466
Nodularia sphaerocarpa	Bacteria	55.914	0.004718	0.002375	0.019283	0.004736	0.004074	0.002688	0.00275	0.001535	0.002468	0.005155	0.004272	0.011998	0.002692	0.002597	0.003414	0.006146	0.001652
Hymenobacter sp. DG01	Bacteria	64.5161	0.004709	0.004846	0.0016	0.003557	0.004931	0.003123	0.010008	0.006587	0.00266	0.003069	0.006386	0.002922	0.005996	0.003748	0.007435	0.005488	0.002434
Salinispora tropica	Bacteria	62.3656	0.004704	0.008657	0.005251	0.006718	0.004718	0.001453	0.005075	0.004586	0.001253	0.004805	0.0046	0.005275	0.003811	0.007258	0.00425	0.004196	0.003786
Paracoccus mutanolyticus	Bacteria	56.9892	0.00468	0.007448	0.004035	0.002454	0.003185	0.010704	0.002602	0.002255	0.004443	0.004126	0.005245	0.000575	0.001013	0.005253	0.005869	0.008643	0.006539
Pusillibacter faecalis	Bacteria	58.0645	0.004662	0.004361	0.005652	0.005408	0.002181	0.001158	0.003685	0.008755	0.006605	0.003913	0.005428	0.005619	0.005356	0.003921	0.006112	0.001546	0.005388
Lacrimispora saccharolytica	Bacteria	60.2151	0.004658	0.004794	0.003437	0.005943	0.00402	0.001634	0.003683	0.004819	0.008745	0.004903	0.004407	0.006336	0.004676	0.005228	0.006573	0.002444	0.002867
Paenibacillus rhizovicinus	Bacteria	51.6129	0.004599	0.003488	0.00077	0.004026	0.003216	0.00143	0.012251	0.002546	0.008253	0.002457	0.006787	0.001083	0.004031	0.004389	0.00207	0.008687	0.007085
Staphylococcus epidermidis	Bacteria	53.7634	0.00456	0.000288	0.008327	0.00268	0.000107	0.000264	0.004802	0.00859	0.012388	0.005947	0.003144	0.001869	0.005952	0.006084	0.003068	0.005698	0.004713
Arabiibacter massiliensis	Bacteria	55.914	0.004508	0.002587	0.009791	0.003269	0.000645	0.007613	0.002211	0.006892	0.004134	0.003034	0.006014	0.004122	0.007033	0.002636	0.007308	0.001054	0.004635
Cupriavidus malaysiensis	Bacteria	45.1613	0.004477	0.004675	0.002384	0.004838	0.001368	0.008026	0.008557	0.002327	0.003116	0.003026	0.00596	0.001164	0.002183	0.005255	0.004475	0.011229	0.002448
Tepiditoga spiralis	Bacteria	65.5914	0.004398	0.007046	0.001562	0.008339	0.003615	0.002433	0.007027	0.001164	0.003255	0.004029	0.004774	0.002974	0.004656	0.003656	0.004379	0.004918	0.005623
Bradyrhizobium diazoefficiens	Bacteria	67.7419	0.004346	0.003204	0.006641	0.006119	0.001416	0.002212	0.003265	0.010793	0.002035	0.005085	0.00359	0.005023	0.00321	0.002263	0.003222	0.010104	0.002034
Ruminococcus sp. FMBCY1	Bacteria	40.8602	0.004286	0.004675	0.004314	0.000802	0.000328	0.001043	0.002871	0.004135	0.016112	0.004791	0.00377	0.001951	0.006469	0.007545	0.00516	0.000954	0.003897
Bifidobacterium angulatum	Bacteria	54.8387	0.004279	0.00071	0.002175	0.00392	0.001359	0.001744	0.002667	0.018664	0.003844	0.004768	0.003781	0.00265	0.00431	0.001164	0.003327	0.011408	0.002326
Methylorubrum extorquens	Bacteria	67.7419	0.004234	0.004557	0.002374	0.003921	0.001495	0.00883	0.00391	0.0045	0.004002	0.003666	0.004816	0.001467	0.002589	0.004427	0.006258	0.007659	0.002859
Lactobacillus gasseri	Bacteria	45.1613	0.004195	0.000294	0.007888	0.002976	0.003369	0.003326	0.003055	0.008753	0.004897	0.003434	0.004973	0.001572	0.006678	0.003437	0.003373	0.004966	0.004886
Enterobacter hormaechei	Bacteria	55.914	0.004066	0.000821	0.011913	0.004421	0.004589	0.001254	0.005768	0.002046	0.002858	0.001352	0.00684	0.001412	0.002869	0.0088	0.002298	0.008086	0.00136
Streptomyces sp. Tu 2975	Bacteria	62.3656	0.004049	0.002782	0.00267	0.005688	0.004713	0.00156	0.007337	0.006047	0.001531	0.00455	0.003537	0.004222	0.002613	0.003866	0.001995	0.005874	0.005713
Prosthecochloris sp. HL-130-GSB	Bacteria	66.6667	0.003999	0.006644	0.002196	0.004664	0.002262	0.003811	0.003128	0.003811	0.005159	0.00294	0.005081	0.003369	0.00232	0.003673	0.004239	0.00794	0.002371
Prevotella denticola	Bacteria	52.6882	0.00396	0.000316	0.005827	0.011804	0.000747	0.007704	0.000588	0.000727	0.004008	0.004547	0.00336	0.003316	0.000486	0.001341	0.004714	0.005368	0.008168
Desulfovibrio piger	Bacteria	41.9355	0.003938	0.001287	0.011266	0.000189	0.002193	4.1e-05	0.001482	0.004465	0.011843	0.004348	0.003518	0.000336	0.014521	0.000102	0.004239	0.001137	0.002586
Enterococcus gilvus	Bacteria	41.9355	0.003895	0.010064	7e-05	0.003735	0.014068	0.000382	0.000426	0.000219	0.001252	0.001423	0.006421	0.01078	0.002576	0.0007	0.000481	0.005784	0.00308
Parageobacillus caldoxylosilyticus	Bacteria	37.6344	0.003882	5e-05	0.001776	0.003644	0.000208	0.001066	0.0097	0.01067	0.004157	0.004161	0.003598	0.006774	0.003831	0.000327	0.002544	0.00763	0.001924
Olsenella sp. oral taxon 807	Bacteria	52.6882	0.003865	0.005961	0.004346	0.000784	0.001216	0.00405	0.001297	0.003826	0.009516	0.004466	0.00325	0.002716	0.005262	0.001337	0.007131	0.001681	0.004674
Pseudomonas putida	Bacteria	60.2151	0.003862	0.00118	0.000957	0.002798	0.009184	0.001006	0.007696	0.004937	0.002746	0.002179	0.005582	0.001711	0.001539	0.001751	0.000947	0.006467	0.010361
Escherichia sp. E4742	Bacteria	38.7097	0.00386	0.000234	0.01038	0.002031	0.005287	0.001651	0.005895	0.004634	0.001923	0.000897	0.006888	0.001014	0.001526	0.009471	0.003319	0.007237	0.001119
Parageobacillus toebii	Bacteria	59.1398	0.00386	0.00103	0.012686	0.000934	0.000582	0.001141	0.002395	0.011227	0.002966	0.005853	0.001823	0.009868	0.000766	0.008807	0.001453	0.002684	0.000574
Nostoc sp. NIES-4103	Bacteria	68.8172	0.003853	0.003234	0.001799	0.008569	0.003975	0.001613	0.008132	0.001616	0.00136	0.003504	0.00421	0.002789	0.002907	0.004172	0.002747	0.005078	0.0054
Brevibacillus choshinensis	Bacteria	47.3118	0.003815	0.00188	0.002485	0.002925	0.00013	0.000645	0.007658	0.00408	0.010518	0.004399	0.003218	0.005537	0.003548	0.000364	0.006718	0.002281	0.004119
Hymenobacter sp. 5317J-9	Bacteria	72.043	0.003791	0.00468	0.00418	0.006827	0.003023	0.001949	0.002293	0.006728	0.000958	0.004558	0.003008	0.006095	0.002613	0.005486	0.002032	0.003043	0.003833
Streptococcus lactarius	Bacteria	47.3118	0.003741	0.004269	0.003189	0.002497	0.001137	0.002836	0.005537	0.004782	0.005677	0.004701	0.00276	0.003509	0.005018	0.002338	0.005578	0.000825	0.004988
Methylacidiphilum kamchatkense	Bacteria	59.1398	0.003725	0.002395	0.007189	0.003605	0.004367	0.000649	0.007647	0.003124	0.001349	0.004005	0.003438	0.007458	0.001339	0.003859	0.002621	0.004012	0.00331
Aquifex aeolicus	Bacteria	62.3656	0.003673	0.004883	0.001934	0.005018	0.001961	0.004518	0.005586	0.003557	0.001625	0.002647	0.004721	0.001749	0.004428	0.004043	0.005504	0.004058	0.002179
Pelobacter propionicus	Bacteria	53.7634	0.003669	0.000456	0.000489	0.005717	0.005749	0.000401	0.009192	0.005808	0.00119	0.003841	0.003494	0.003934	0.001872	0.002059	0.00061	0.008141	0.005214
Streptomyces aurantiacus	Bacteria	75.2688	0.003667	0.006255	0.001706	0.004734	0.002835	0.002938	0.003713	0.004668	0.002246	0.003319	0.004023	0.002616	0.00392	0.004223	0.003688	0.003463	0.004098
Moraxella osloensis	Bacteria	74.1935	0.003583	0.003774	0.004106	0.004565	0.001699	0.005927	0.00208	0.004374	0.002289	0.004086	0.003068	0.003939	0.001838	0.004018	0.005588	0.003557	0.002632
Moorena producens	Bacteria	69.8925	0.003558	0.002983	0.001103	0.004162	0.003709	0.001254	0.00549	0.008056	0.001672	0.003372	0.003748	0.003383	0.002783	0.007549	0.001064	0.004374	0.002681
Thermoclostridium stercorarium	Bacteria	68.8172	0.003502	0.003159	0.004302	0.004728	0.001751	0.00343	0.003188	0.003474	0.004114	0.001829	0.005211	0.00126	0.00288	0.003198	0.004378	0.006176	0.002941
Mameliella alba	Bacteria	70.9677	0.003501	0.003527	0.002183	0.005516	0.0026	0.001446	0.006639	0.003266	0.002592	0.003195	0.003814	0.003771	0.00263	0.004728	0.00292	0.004266	0.002862
Candidatus Portiera aleyrodidarum	Bacteria	56.9892	0.003469	0.004942	0.00147	0.006583	0.002316	0.00298	0.005218	0.002778	0.001075	0.00315	0.003795	0.003864	0.003287	0.003717	0.003878	0.004671	0.001452
Microcystis aeruginosa	Bacteria	53.7634	0.003458	0.004093	0.000407	0.004782	0.010003	0.002775	0.002235	0.000481	0.002137	0.003215	0.003707	0.000687	0.004721	0.001448	0.002915	0.00464	0.005916
Pikeienuella piscinae	Bacteria	72.043	0.00343	0.00435	0.000897	0.005106	0.003399	0.00229	0.004097	0.005109	0.00191	0.002846	0.004027	0.003219	0.004338	0.003635	0.002714	0.003135	0.003553
Clostridium sp. AWRP	Bacteria	67.7419	0.003421	0.004695	0.000827	0.005958	0.003688	0.001666	0.006754	0.000768	0.002359	0.002738	0.004118	0.002781	0.005305	0.002333	0.003231	0.003338	0.003362
Enterobacter asburiae	Bacteria	64.5161	0.003418	0.003139	0.004052	0.002966	0.002242	0.002897	0.003503	0.006179	0.002698	0.002245	0.004616	0.001828	0.002585	0.006002	0.003008	0.005234	0.002072
Roseimicrobium sp. ORNL1	Bacteria	63.4409	0.003387	0.001901	0.000729	0.002313	0.003456	0.001468	0.009981	0.006022	0.000999	0.00209	0.004712	0.000743	0.007694	0.005356	0.003388	0.002091	0.001127
Olsenella uli	Bacteria	48.3871	0.003384	0.005925	0.003255	0.001044	0.001967	0.003358	0.000393	0.002274	0.00874	0.004867	0.001869	0.0038	0.003542	0.002416	0.005639	0.002004	0.002808
Dyadobacter sp. LJ419	Bacteria	72.043	0.003383	0.004145	0.002272	0.007517	0.002563	0.001687	0.005089	0.002266	0.001246	0.003415	0.00335	0.002417	0.004086	0.003967	0.002453	0.004768	0.002619
Streptococcus equi	Bacteria	46.2366	0.003371	0.005736	0.000976	0.005762	0.005318	0.001545	0.002028	0.002283	0.002826	0.002716	0.00404	0.005474	0.002843	0.001142	0.002568	0.003872	0.004178
Streptomyces subrutilus	Bacteria	60.2151	0.003348	0.00413	0.001119	0.003008	0.00168	0.002678	0.003918	0.007083	0.003108	0.002098	0.004625	0.002978	0.002418	0.001991	0.005811	0.005536	0.001162
Brucella pseudogrignonensis	Bacteria	62.3656	0.003278	0.002035	0.004435	0.005028	0.002226	0.001723	0.005862	0.004539	0.000669	0.003311	0.003243	0.004723	0.002383	0.003527	0.002678	0.00326	0.003215
Solibaculum mannosilyticum	Bacteria	45.1613	0.003264	0.001578	0.00268	0.005709	0.000603	0.000511	0.004665	0.006973	0.003604	0.002295	0.004254	0.003178	0.003445	0.002951	0.005282	0.001215	0.003467
Cronobacter sakazakii	Bacteria	64.5161	0.003255	0.004184	0.00234	0.002245	0.003939	0.00585	0.004849	0.000587	0.001668	0.001891	0.004648	0.001132	0.002386	0.004101	0.002476	0.00699	0.002416
Azospirillum sp. TSH58	Bacteria	60.2151	0.00321	0.002901	0.001587	0.005113	0.003018	0.001151	0.006441	0.003754	0.001488	0.00345	0.002965	0.003381	0.002517	0.002368	0.001814	0.003564	0.00552
Salinimonas iocasae	Bacteria	38.7097	0.003201	0.001779	0.012641	0.002016	3.2e-05	7.5e-05	0.004497	0.005811	0.000548	0.004059	0.002325	0.008516	0.001015	0.000296	0.002809	0.001415	0.005124
Vescimonas fastidiosa	Bacteria	51.6129	0.003194	0.002874	0.003062	0.001262	0.001924	0.000498	0.003944	0.003144	0.00882	0.003453	0.00293	0.002234	0.004994	0.00337	0.005012	0.001082	0.002434
Acetobacter pasteurianus	Bacteria	67.7419	0.003166	0.002439	0.001384	0.004789	0.002816	0.003976	0.004973	0.001142	0.003342	0.0031	0.003233	0.002388	0.002256	0.002804	0.003734	0.004092	0.003627
Flavisolibacter tropicus	Bacteria	67.7419	0.003159	0.002488	0.004444	0.003861	0.002248	0.001711	0.005993	0.003494	0.001273	0.002897	0.003426	0.004775	0.001561	0.003285	0.001864	0.002989	0.004595
Desulfovibrio ferrophilus	Bacteria	65.5914	0.003156	0.003923	0.00385	0.004814	0.002774	0.00182	0.002272	0.002263	0.003577	0.002638	0.003686	0.001564	0.00187	0.002624	0.00266	0.006095	0.003959
Streptococcus rubneri	Bacteria	43.0108	0.003143	0.004862	0.003083	0.000912	0.001392	0.004947	0.00066	0.000895	0.008196	0.004281	0.00198	0.002991	0.003888	0.001917	0.005465	0.001866	0.002567
Bacillus wiedmannii	Bacteria	35.4839	0.003138	6.2e-05	0.000515	0.004065	0.017728	8.2e-05	0.000136	0.00022	0.001615	0.001034	0.005287	7.7e-05	0.000432	0.000326	0.000145	0.00455	0.012753
Rhodococcus equi	Bacteria	70.9677	0.00313	0.006345	0.003381	0.00477	0.002014	0.001264	0.002105	0.003931	0.001342	0.004219	0.002018	0.005819	0.001618	0.001009	0.001922	0.007338	0.000979
Limosilactobacillus reuteri	Bacteria	54.8387	0.003074	0.003116	0.002539	0.002403	0.000612	0.00176	0.008138	0.001511	0.004296	0.001644	0.004536	0.001679	0.006568	0.000574	0.004466	0.003117	0.001642
Geobacillus subterraneus	Bacteria	41.9355	0.00307	0.00023	0.00214	0.001646	0.000102	0.001102	0.010153	0.00609	0.003193	0.002802	0.003344	0.007136	0.002519	0.000465	0.002405	0.00438	0.001442
Rhodopseudomonas palustris	Bacteria	63.4409	0.003051	0.001556	0.006705	0.002153	0.001825	0.000467	0.00377	0.008277	0.000701	0.004317	0.001758	0.00389	0.00121	0.001498	0.001873	0.006672	0.003022
Alistipes sp. dk3624	Bacteria	45.1613	0.00305	0.001212	0.001691	0.007248	0.00191	7.1e-05	0.002419	0.003115	0.006512	0.003704	0.002381	0.006073	0.006647	0.001073	0.002546	0.000256	0.001645
Streptococcus sp. oral taxon 431	Bacteria	44.086	0.003019	0.004568	0.001001	0.00269	0.00044	0.00396	0.003334	0.003694	0.004186	0.00314	0.002896	0.002096	0.002083	0.003213	0.007329	0.000413	0.002947
Thermus brockianus	Bacteria	33.3333	0.002981	0.000171	0.002249	0.00192	4.8e-05	0.001207	0.006811	0.007608	0.004095	0.002855	0.003109	0.00491	0.001942	0.001853	0.001886	0.006177	0.001098
Streptococcus dysgalactiae	Bacteria	40.8602	0.002976	0.002077	0.00136	0.0025	0.00603	0.001915	0.002383	0.002466	0.004769	0.003182	0.002766	0.006194	0.003857	0.001777	0.002848	0.001265	0.001969
Neisseria sicca	Bacteria	43.0108	0.002969	0.002079	0.004273	0.003045	5.5e-05	0.001573	0.006718	0.004839	0.001545	0.003349	0.002581	0.004478	0.000488	0.00043	0.001738	0.002736	0.007723
Flintibacter sp. KGMB00164	Bacteria	44.086	0.002957	0.001561	0.001453	0.004937	0.006117	0.001004	0.001623	0.002709	0.003983	0.001997	0.003939	0.007163	0.002818	0.001759	0.002492	0.000822	0.002805
Priestia aryabhattai	Bacteria	60.2151	0.002954	0.002763	0.000894	0.004925	0.001723	0.003074	0.006024	0.001796	0.001991	0.002636	0.003279	0.002465	0.00459	0.002055	0.003651	0.002989	0.001831
Lactococcus carnosus	Bacteria	19.3548	0.00293	0.003068	0.004235	0.000205	1e-05	0.0039	0.00112	0.000971	0.009987	0.004076	0.001759	0.001909	0.004397	0.003389	0.003211	0.001345	0.003323
Aliarcobacter lanthieri	Bacteria	49.4624	0.002929	0.001731	0.002042	0.003054	0.005982	0.000525	0.00175	0.005956	0.002499	0.002504	0.003364	0.001813	0.001533	0.004411	0.001152	0.006744	0.002038
Prevotella dentalis	Bacteria	31.1828	0.002926	0.000314	1.2e-05	0.012642	0.000647	0.007191	0.000647	0.000511	0.000759	0.002181	0.003688	0.000411	0.000703	5e-06	0.000899	0.005602	0.009416
Pandoraea pnomenusa	Bacteria	62.3656	0.002887	0.002576	0.003071	0.003301	0.004791	0.001999	0.003264	0.002554	0.001543	0.002398	0.003387	0.002356	0.003372	0.001855	0.002604	0.004567	0.002406
Pediococcus claussenii	Bacteria	39.7849	0.002868	0.009391	0.001618	0.000875	0.002278	0.000506	0.004747	0.002984	0.000347	0.002762	0.002977	0.000334	0.001807	0.002378	0.007644	0.002038	0.002788
Rhizobium leguminosarum	Bacteria	69.8925	0.002797	0.001628	0.001441	0.005702	0.003184	0.001465	0.004344	0.003159	0.001259	0.001984	0.003628	0.001947	0.003351	0.002399	0.005281	0.001616	0.002087
Turicimonas muris	Bacteria	45.1613	0.002795	7.9e-05	0.0018	0.004336	0.0005	0.00809	0.001878	0.004154	0.001467	0.002919	0.002668	0.00017	0.001111	0.001034	0.002834	0.007038	0.004196
Lelliottia amnigena	Bacteria	65.5914	0.002793	0.002277	0.007538	0.002723	0.002541	0.000933	0.004373	0.001662	0.00099	0.002953	0.002629	0.005147	0.00119	0.004038	0.001761	0.003297	0.001625
Mycobacterium gordonae	Bacteria	40.8602	0.002773	0.000252	0.002619	0.002158	0.000297	0.000793	0.002711	0.009946	0.003977	0.003747	0.001778	0.001011	0.002281	0.001811	0.002345	0.008168	0.000791
Paenibacillus polymyxa	Bacteria	62.3656	0.002762	0.002421	0.00094	0.003255	0.002574	0.000821	0.00454	0.005816	0.001684	0.001919	0.003624	0.002671	0.002109	0.003476	0.00339	0.002742	0.002269
Bartonella australis	Bacteria	50.5376	0.002753	0.001659	0.001073	0.005697	0.001666	0.003531	0.005316	0.000791	0.001849	0.002248	0.003269	0.003091	0.002281	0.002749	0.002941	0.004624	0.000853
Sorangium cellulosum	Bacteria	73.1183	0.002717	0.00316	0.001315	0.003672	0.002546	0.001085	0.002259	0.006389	0.001385	0.002951	0.002479	0.003126	0.001665	0.00247	0.001128	0.004733	0.003176
Monoglobus pectinilyticus	Bacteria	39.7849	0.002689	0.002659	0.000827	0.00347	0.00098	0.004213	0.001222	0.002057	0.005721	0.002484	0.002898	0.002662	0.004651	0.00288	0.003907	0.000631	0.001426
Streptococcus sp. oral taxon 061	Bacteria	44.086	0.002682	0.003792	0.000765	0.001666	0.001029	0.002974	0.003489	0.002061	0.005305	0.003329	0.00202	0.002155	0.002053	0.002417	0.006253	0.000188	0.002958
Streptococcus pasteurianus	Bacteria	27.957	0.002659	0.001215	0.000615	0.005806	0.007309	0.000917	0.00081	0.000383	0.003686	0.00122	0.004129	0.006288	0.001189	0.002249	0.001137	0.000587	0.004679
Gilliamella sp. ESL0443	Bacteria	55.914	0.002656	0.002361	0.000853	0.004229	0.001779	0.000638	0.008336	0.001466	0.001189	0.001954	0.003374	0.002731	0.004164	0.001269	0.001811	0.002969	0.002826
Emergencia timonensis	Bacteria	55.914	0.002652	0.002785	0.002176	0.003061	0.001276	0.001778	0.003108	0.001598	0.005267	0.003067	0.002228	0.002143	0.002986	0.003758	0.003936	0.001431	0.001764
Eubacterium sp. MSJ-33	Bacteria	50.5376	0.002649	0.003122	0.002205	0.001398	0.002922	0.001209	0.001939	0.000871	0.0073	0.003161	0.002125	0.003107	0.002737	0.004705	0.003601	0.000416	0.00161
Priestia megaterium	Bacteria	66.6667	0.00264	0.001216	0.001127	0.001466	0.001304	0.000583	0.010545	0.002409	0.002198	0.001836	0.003461	0.002071	0.007443	0.002127	0.001122	0.00145	0.001529
Capnocytophaga gingivalis	Bacteria	54.8387	0.002636	0.001871	0.000934	0.002835	0.00317	0.001824	0.004271	0.005734	0.000426	0.002364	0.002915	0.002869	0.00286	0.002012	0.004727	0.00211	0.001177
Corynebacterium argentoratense	Bacteria	37.6344	0.002632	0.008862	0.001358	0.00059	0.003891	0.000339	0.001715	0.000219	0.00367	0.003072	0.002183	0.002677	0.003084	0.006548	0.001536	0.000485	0.001956
Paraprevotella xylaniphila	Bacteria	51.6129	0.002624	0.001976	0.001814	0.006086	0.000789	0.002938	0.001748	0.0043	0.001343	0.00192	0.003343	0.003796	0.004041	0.001127	0.000862	0.002123	0.003679
Anaerocolumna sedimenticola	Bacteria	69.8925	0.002615	0.002521	0.002894	0.002675	0.001149	0.001094	0.002533	0.002902	0.005219	0.002628	0.002601	0.002411	0.002893	0.004149	0.003615	0.001146	0.001653
Parolsenella massiliensis	Bacteria	53.7634	0.002608	0.001113	0.003632	0.002637	0.002641	0.004022	0.000901	0.003476	0.002684	0.001704	0.003531	0.002957	0.00435	0.002119	0.00371	0.000795	0.001676
Bartonella krasnovii	Bacteria	67.7419	0.002601	0.001484	0.000704	0.003247	0.004505	0.002099	0.004104	0.003084	0.001302	0.003282	0.001905	0.001271	0.001172	0.002872	0.00268	0.006422	0.001138
Escherichia sp. SCLE84	Bacteria	10.7527	0.002598	0	0.003997	0.003231	0.002222	0.008874	0.001375	6e-05	0.001049	0.002571	0.002626	0.000307	0.000787	0.003005	4.2e-05	0.009154	0.002205
Geobacillus genomosp. 3	Bacteria	34.4086	0.00258	0.000518	0.002005	0.000989	3.9e-05	0.001014	0.008546	0.005562	0.002122	0.002363	0.002802	0.006411	0.001829	0.00085	0.001758	0.003599	0.001058
Christensenella sp. Marseille-P3954	Bacteria	53.7634	0.002543	0.00045	0.003505	0.004942	0.002023	0.000589	0.002526	0.003044	0.003465	0.00306	0.002015	0.00514	0.001309	0.002777	0.003104	0.002451	0.000667
Echinicola sp. 20G	Bacteria	61.2903	0.002518	0.002445	0.00107	0.003955	0.002344	0.003121	0.003744	0.002415	0.000799	0.001879	0.003171	0.001933	0.002737	0.003404	0.002576	0.003274	0.001257
Yersinia pestis	Bacteria	13.9785	0.002507	0	0.014115	0.000421	0.001493	3.6e-05	0.005232	0.000172	0.000325	0.000155	0.004909	0.001176	0.000312	0.004786	0.000127	0.008683	0.000158
Pseudobutyrivibrio xylanivorans	Bacteria	44.086	0.002474	0.002424	0.002267	0.0011	0.001009	0.001296	0.001398	0.002573	0.007702	0.003	0.001937	0.002218	0.003144	0.003269	0.00371	0.000922	0.001666
Citrobacter portucalensis	Bacteria	23.6559	0.002447	3.8e-05	0.007973	0.001244	0.002028	0.006664	0.000914	0.000969	0.00054	0.00217	0.00273	0.004501	0.00616	0.001674	6.4e-05	0.001674	0.000638
Massilia oculi	Bacteria	62.3656	0.002415	0.002772	0.001205	0.003492	0.0025	0.003228	0.002953	0.002037	0.000898	0.002328	0.002503	0.002165	0.001956	0.00234	0.004483	0.002311	0.001208
Gemella sanguinis	Bacteria	36.5591	0.002407	0.005606	0.001497	0.001128	0.000885	0.002574	0.000975	0.000831	0.005477	0.003193	0.001604	0.001687	0.002788	0.001399	0.005736	0.000742	0.001919
Bifidobacterium imperatoris	Bacteria	34.4086	0.002401	0.004153	0.000429	0.002137	0.000614	0.003392	0.00324	0.004361	0.000714	0.002391	0.002411	0.005812	0.003281	0.000426	0.00458	8.6e-05	0.000184
Brevibacillus brevis	Bacteria	64.5161	0.002398	0.002239	0.001571	0.001974	0.00396	0.000633	0.005485	0.001013	0.002056	0.001492	0.003324	0.00304	0.003899	0.000679	0.003334	0.002026	0.001236
Polaribacter pectinis	Bacteria	43.0108	0.002379	0.000852	0.000714	0.001903	0.00952	0.000932	0.0014	0.003188	0.000318	0.003249	0.001491	0.001481	0.00133	0.003488	0.000839	0.006538	0.000683
Romboutsia sp. CE17	Bacteria	58.0645	0.002373	0.003342	0.005167	0.003468	0.001144	0.001828	0.002065	0.000726	0.001575	0.002082	0.00267	0.002494	0.00248	0.001555	0.003373	0.003317	0.000924
Neobacillus drentensis	Bacteria	51.6129	0.002369	0.000449	7.2e-05	0.001667	0.002866	0.003835	0.001033	0.008558	0.000604	0.002724	0.002006	0.002135	0.000348	0.005259	0.003466	0.002244	0.001108
Achromobacter mucicolens	Bacteria	51.6129	0.002359	0.002037	0.001408	0.004016	0.002272	0.001552	0.003815	0.002928	0.000733	0.002276	0.002444	0.002026	0.001502	0.002385	0.001346	0.002755	0.004121
Enterococcus casseliflavus	Bacteria	47.3118	0.00235	4.8e-05	0.000385	0.001376	0.004062	0.000542	0.001266	0.005699	0.005371	0.002361	0.002338	0.002764	0.003553	0.002779	0.00089	0.003662	0.000529
Bacteroides nordii	Bacteria	47.3118	0.002347	0.001192	0.001132	0.004706	0.003451	0.001975	0.00155	0.004168	0.00055	0.002896	0.001785	0.002607	0.002655	0.001184	0.001229	0.00294	0.003336
Archangium gephyra	Bacteria	36.5591	0.002345	0.003066	6.4e-05	1.5e-05	0.000454	8.7e-05	0.011289	0.002542	0.000875	0.000633	0.004094	0.001472	0.008676	0.000202	0.000149	0.001021	0.002224
Leptotrichia hofstadii	Bacteria	58.0645	0.002343	0.001744	0.000415	0.002362	0.000786	0.001432	0.001387	0.010124	0.00082	0.001257	0.003453	0.000972	0.000809	0.009716	0.000704	0.002236	0.000457
Microbulbifer hydrolyticus	Bacteria	65.5914	0.002307	0.002372	0.001289	0.004464	0.001993	0.001225	0.003521	0.002545	0.000898	0.002074	0.002545	0.001615	0.001801	0.004015	0.001747	0.001819	0.003016
Romboutsia ilealis	Bacteria	46.2366	0.002291	0.003203	0.001617	0.001024	0.001053	0.002359	0.001544	0.001426	0.005916	0.002701	0.001872	0.002841	0.003186	0.002381	0.00239	0.00145	0.001542
Prevotella histicola	Bacteria	27.957	0.002279	2.7e-05	0.000122	0.001503	1.4e-05	0.001952	0.000279	2.5e-05	0.013765	0.003791	0.000735	5.6e-05	0.000136	3.1e-05	0.011062	0.000857	0.001113
Hymenobacter monticola	Bacteria	68.8172	0.002265	0.002262	0.00493	0.003334	0.002091	0.000481	0.001264	0.00315	0.001129	0.00298	0.001536	0.004705	0.001481	0.002009	0.000898	0.003218	0.001402
Cutibacterium granulosum	Bacteria	37.6344	0.00225	0.000524	0.001158	0.001953	7e-06	0.000477	0.010823	0.002208	0.000666	0.001069	0.003457	0.000932	0.000611	0.00033	0.001369	0.001869	0.008068
Chryseobacterium indologenes	Bacteria	59.1398	0.002243	0.001849	0.000627	0.001045	0.000247	0.001297	0.01034	0.001547	0.000666	0.003149	0.001318	0.001087	0.000782	0.007709	0.002217	0.00179	0.000484
Vibrio rotiferianus	Bacteria	45.1613	0.002241	0.001131	0.004664	0.0056	0.000174	0.000477	0.005175	0.000705	0.000276	0.002395	0.002083	0.005538	0.001201	0.002549	0.001118	0.000534	0.002747
Xanthomonas campestris	Bacteria	40.8602	0.00222	0.000381	0.000398	0.001815	0.000217	0.000181	0.002718	0.011105	0.001382	0.003452	0.000962	0.000784	0.001872	0.000344	0.000409	0.008773	0.000815
Microbacterium sp. Nx66	Bacteria	29.0323	0.00222	5.3e-05	0.000842	0.000214	3.7e-05	0.000466	0.0022	0.011483	0.003008	0.003597	0.000813	0.001158	0.000756	0.000363	0.001151	0.008	0.001595
Epilithonimonas vandammei	Bacteria	54.8387	0.002208	0.000543	0.000407	0.001566	0.001293	0.001951	0.007467	0.003308	0.000922	0.001773	0.002653	0.000299	0.001204	0.002167	0.002255	0.00272	0.004479
Coprobacter secundus	Bacteria	54.8387	0.002204	0.001601	0.000325	0.00475	0.000302	0.00459	0.001622	0.003401	0.00083	0.002699	0.001699	0.002766	0.001479	0.000328	0.000859	0.004615	0.002979
Helicobacter pylori	Bacteria	66.6667	0.002189	0.002222	0.001771	0.005916	0.001999	0.001288	0.001697	0.001779	0.00074	0.001998	0.002385	0.002088	0.001792	0.001953	0.002647	0.002294	0.002327
Klebsiella grimontii	Bacteria	35.4839	0.002185	0.000971	0.00171	0.002894	0.000733	0.000506	0.006105	0.004341	0.000321	0.002541	0.001821	0.004561	0.003868	0.001559	0.000271	0.00258	0.000342
Fischerella sp. NIES-4106	Bacteria	54.8387	0.002183	0.003231	0.000722	0.00216	0.001886	0.00213	0.001801	0.002981	0.002373	0.002545	0.001812	0.002667	0.000921	0.002197	0.003101	0.002443	0.001799
Agrobacterium larrymoorei	Bacteria	51.6129	0.002178	0.002441	0.000291	0.004807	0.000287	0.00046	0.005896	0.000977	0.001853	0.001796	0.002569	0.001437	0.002411	0.004528	0.00075	0.002268	0.001923
Citrobacter koseri	Bacteria	20.4301	0.002176	2e-05	0.008114	0.00043	0.002975	0.000654	0.00476	6.2e-05	0.001204	0.000294	0.004099	0.000368	0.000931	0.006596	0.000315	0.004938	0.000345
Enterobacter cloacae	Bacteria	48.3871	0.002161	0.000466	0.005983	0.001188	0.003164	0.00145	0.003649	0.000613	0.001284	0.00078	0.003573	0.000851	0.001137	0.005422	0.000592	0.004487	0.000803
Roseimaritima ulvae	Bacteria	62.3656	0.002148	0.00263	0.001193	0.002112	0.001503	0.001218	0.006141	0.00154	0.00064	0.001425	0.002887	0.001088	0.004946	0.001603	0.001513	0.001178	0.002427
Acaryochloris marina	Bacteria	56.9892	0.00214	0.002031	0.002158	0.001329	0.002409	0.001193	0.002746	0.003397	0.001964	0.001211	0.003089	0.000412	0.003491	0.004074	0.001485	0.002203	0.001307
Streptococcus parasuis	Bacteria	35.4839	0.002136	0.003637	0.000162	0.003529	0.006829	0.000394	0.00029	0.000385	0.00139	0.000584	0.003723	0.005527	0.000478	0.000482	0.000334	0.002906	0.003096
Undibacterium sp. KW1	Bacteria	49.4624	0.002115	0.000966	0.001399	0.005676	0.00232	0.000721	0.00051	0.004116	0.001261	0.002768	0.001448	0.00269	0.001394	0.003761	0.001036	0.002601	0.00145
Butyrivibrio fibrisolvens	Bacteria	51.6129	0.002113	0.002394	0.001955	0.001217	0.002554	0.0009	0.001118	0.001211	0.005455	0.002382	0.001839	0.002998	0.00233	0.002522	0.003161	0.00057	0.001205
Prevotella multiformis	Bacteria	33.3333	0.002099	0.000183	0.000223	0.008708	0.000976	0.004488	0.001036	0.000272	0.000439	0.001525	0.002685	0.000334	0.000908	0.000637	0.000515	0.003582	0.006323
Cupriavidus taiwanensis	Bacteria	59.1398	0.002084	0.001675	0.001858	0.00385	0.001773	0.000797	0.002235	0.003287	0.00126	0.00215	0.002017	0.004505	0.001936	0.002046	0.00147	0.001833	0.000861
Anaerocolumna chitinilytica	Bacteria	49.4624	0.002083	0.001915	0.001731	0.00088	0.001042	0.000721	0.002586	0.00212	0.00561	0.002067	0.002098	0.001788	0.002315	0.00339	0.003244	0.000836	0.001068
Klebsiella michiganensis	Bacteria	37.6344	0.002075	3.2e-05	0.008076	0.000344	0.002047	0.00364	0.000757	0.0019	0.000789	0.001016	0.003157	0.001867	0.003669	0.001439	0.000159	0.001435	0.003788
Bradyrhizobium sp. BTAi1	Bacteria	35.4839	0.002066	0.001463	0.000588	0.000996	8.7e-05	0.00042	0.002521	0.007171	0.003463	0.003073	0.001038	0.001463	0.001159	0.001112	0.001353	0.005038	0.002115
Borreliella burgdorferi	Bacteria	55.914	0.002065	0.001167	0.001266	0.0028	0.001493	0.000689	0.005326	0.003093	0.000641	0.001532	0.00261	0.002041	0.002179	0.00163	0.001441	0.001805	0.003239
Spiribacter sp. E85	Bacteria	64.5161	0.002064	0.00122	0.001542	0.00218	0.001996	0.001929	0.00395	0.001824	0.001762	0.001931	0.002199	0.001486	0.001464	0.001291	0.00271	0.003479	0.001821
Paenibacillus peoriae	Bacteria	44.086	0.002018	0.002205	0.000356	0.001156	0.002325	0.000585	0.005651	0.002694	0.000954	0.002679	0.001343	0.006446	0.002277	0.001207	0.000718	0.001178	0.000459
Enterococcus lactis	Bacteria	18.2796	0.002013	0.000381	0.00058	0	0.004642	3.9e-05	7.2e-05	0.000663	0.009376	0.002438	0.001579	0.003913	0.000844	0.004558	0.000116	0.002583	0.000502
Lachnoanaerobaculum umeaense	Bacteria	55.914	0.002008	0.001701	0.001265	0.001717	0.000419	0.000658	0.003027	0.003418	0.003851	0.002302	0.001707	0.001335	0.001605	0.002678	0.002552	0.001966	0.001952
Bifidobacterium pseudolongum	Bacteria	53.7634	0.002001	0.000525	0.008079	0.003257	0.000661	0.000669	0.001351	0.001825	0.000642	0.003103	0.000876	0.006117	0.000891	0.002445	0.001055	0.001528	0.000285
Agarivorans sp. TSD2052	Bacteria	53.7634	0.001998	0.001594	0.001178	0.001985	0.00115	0.000457	0.005893	0.000652	0.002826	0.001043	0.002973	0.00086	0.002256	0.001527	0.001614	0.002572	0.003028
Chlorobium phaeobacteroides	Bacteria	56.9892	0.001997	0.003051	0.000827	0.003648	0.00174	0.002056	0.002205	0.000667	0.001473	0.001437	0.002568	0.000706	0.002135	0.003084	0.001641	0.002638	0.001831
Glycocaulis alkaliphilus	Bacteria	64.5161	0.001975	0.001557	0.000846	0.002987	0.001584	0.004508	0.001517	0.002151	0.000475	0.002803	0.001128	0.002164	0.000818	0.001141	0.003845	0.002602	0.001186
Variovorax sp. WDL1	Bacteria	48.3871	0.001974	0.000784	0.000265	0.001826	0.000265	0.0005	0.004145	0.006978	0.001158	0.001769	0.002183	0.002129	0.000455	0.005163	0.000622	0.000805	0.003077
Brucella canis	Bacteria	13.9785	0.001952	5.1e-05	0.001445	0.005516	0.004322	0.000267	0.000124	0.001525	0.00225	0.001097	0.002826	0	0.002083	5.5e-05	0.000173	0.007992	0.001052
Pseudomonas sp. J380	Bacteria	24.7312	0.001927	3e-06	0.000797	0.002956	0.00904	0.00055	7.6e-05	0.000914	0.000803	0.000787	0.00309	2.7e-05	0.00075	0.000628	0.000309	0.00328	0.006285
Mycolicibacterium mageritense	Bacteria	58.0645	0.001913	0.00131	0.001295	0.003883	0.002753	0.001115	0.002254	0.00127	0.001269	0.002276	0.001542	0.000998	0.002183	0.002199	0.001153	0.003081	0.001845
Virgibacillus sp. NKC19-16	Bacteria	61.2903	0.001902	0.00359	0.001035	0.002806	0.00146	0.001825	0.002147	0.001422	0.000744	0.001642	0.002167	0.000835	0.001769	0.002183	0.00179	0.003799	0.001003
Belliella baltica	Bacteria	59.1398	0.001894	0.001323	0.000866	0.002716	0.004579	0.00114	0.002453	0.000897	0.000925	0.002043	0.001742	0.001057	0.002103	0.00091	0.001094	0.004029	0.001996
Variovorax paradoxus	Bacteria	62.3656	0.001889	0.001294	0.000899	0.002672	0.000592	0.001633	0.003438	0.002208	0.002239	0.001996	0.001781	0.000802	0.001704	0.001053	0.001689	0.004333	0.001582
Lautropia mirabilis	Bacteria	41.9355	0.001888	0.002908	0.000139	0.001795	4e-06	0.000841	0.005092	0.003611	0.000565	0.001682	0.002098	0.0008	0.000364	0.000178	0.000713	0.002563	0.006428
Lentibacillus amyloliquefaciens	Bacteria	65.5914	0.001872	0.002508	0.000936	0.002914	0.001905	0.001367	0.001031	0.002093	0.002086	0.001567	0.002184	0.000828	0.001149	0.001756	0.003239	0.003299	0.000882
Borrelia miyamotoi	Bacteria	55.914	0.001871	0.001522	0.002443	0.003827	0.001538	0.001612	0.001045	0.001188	0.001829	0.001313	0.00244	0.001378	0.00174	0.000644	0.002182	0.004079	0.001017
Cohnella abietis	Bacteria	68.8172	0.001856	0.001356	0.005701	0.002726	0.001263	0.000642	0.002514	0.000394	0.000772	0.002495	0.001203	0.004872	0.001594	0.001655	0.000626	0.001122	0.001432
Anaerocolumna cellulosilytica	Bacteria	51.6129	0.001855	0.001908	0.001761	0.000937	0.000874	0.001433	0.001677	0.002258	0.004009	0.002073	0.001632	0.001731	0.001602	0.002263	0.002625	0.001505	0.001447
Pseudomonas syringae	Bacteria	59.1398	0.001853	0.001526	0.002093	0.002946	0.002785	0.001088	0.002096	0.0018	0.000528	0.001147	0.002576	0.000584	0.001528	0.000791	0.001267	0.003699	0.00304
Veillonella nakazawae	Bacteria	30.1075	0.001853	0.001974	0.000372	0.001226	0.000227	0.000211	0.002405	0.00104	0.007053	0.002716	0.00097	0.000547	0.001491	0.000238	0.007059	0.000197	0.001301
Streptococcus infantis	Bacteria	45.1613	0.00183	0.003502	0.000662	0.000803	0.001345	0.001707	0.001435	0.001462	0.003496	0.001847	0.001812	0.002135	0.001285	0.001466	0.002978	0.001362	0.001725
Finegoldia magna	Bacteria	39.7849	0.001802	0.001734	0.007034	0.002122	0.000109	0.000302	0.002103	0.001031	0.000791	0.00297	0.000609	0.005679	0.001966	0.000898	0.001509	0.000632	0.000259
Aequorivita sublithincola	Bacteria	51.6129	0.001796	0.00244	0.000974	0.004175	0.001353	0.00091	0.001672	0.00237	0.000384	0.001186	0.002419	0.00076	0.001691	0.002462	0.001011	0.003314	0.001557
Lactobacillus delbrueckii	Bacteria	70.9677	0.00179	0.001467	0.001708	0.003096	0.001025	0.001062	0.00356	0.001085	0.001242	0.001688	0.001894	0.001727	0.002289	0.001916	0.001712	0.00168	0.001426
Cardiobacterium hominis	Bacteria	39.7849	0.001784	0.002718	0.00337	0.001027	3e-06	0.000538	0.005297	0.000977	0.000538	0.001157	0.002425	0.002238	0.000496	0.000325	0.000681	0.000565	0.006245
Fructilactobacillus fructivorans	Bacteria	30.1075	0.001747	0.000478	1.1e-05	0.001053	0.00225	0.005235	7.7e-05	0.004759	7.1e-05	0.001593	0.001904	0.000113	0.00178	0.000456	0.007045	0.000238	0.000584
Geobacillus thermodenitrificans	Bacteria	16.129	0.001717	0	0.002053	0.000446	1.9e-05	0.000501	0.003807	0.005987	0.001335	0.002284	0.001138	0.002726	0.000954	7.1e-05	0.001937	0.004156	0.000316
Pedobacter heparinus	Bacteria	54.8387	0.001715	0.001229	0.000698	0.00169	0.005197	0.00068	0.00293	0.000848	0.000203	0.00082	0.002629	0.001014	0.004093	0.000991	0.001947	0.001743	0.000365
Calothrix sp. 336/3	Bacteria	47.3118	0.001712	0.002264	0.001888	0.004427	0.001715	0.001119	0.001461	0.000493	0.000257	0.001788	0.001634	0.001893	0.001884	0.000518	0.00147	0.001765	0.002605
Streptococcus pseudopneumoniae	Bacteria	35.4839	0.001701	0.002679	0.001029	0.000914	6.7e-05	0.000889	0.002715	0.004276	0.00114	0.002194	0.001197	0.000629	0.001125	0.000586	0.005224	0.000201	0.002235
Parolsenella catena	Bacteria	39.7849	0.001693	0.000455	0.002182	0.001108	0.002086	0.001028	0.000937	0.001517	0.004295	0.001472	0.001918	0.002129	0.002377	0.002126	0.00121	0.000776	0.00162
Brachyspira murdochii	Bacteria	51.6129	0.001691	0.002372	0.000268	0.00254	0.001281	0.000884	0.002705	0.001298	0.001907	0.001227	0.002164	0.001726	0.001159	0.000668	0.001562	0.001821	0.003082
Shewanella putrefaciens	Bacteria	59.1398	0.001687	0.000859	0.001048	0.004103	0.001267	0.001538	0.002827	0.000811	0.000866	0.001516	0.001863	0.001936	0.001477	0.00224	0.001828	0.001389	0.001338
Pseudomonas stutzeri	Bacteria	44.086	0.001682	0.000148	0.000553	0.000622	0.000335	0.00013	0.000472	0.010767	0.001002	0.002791	0.00055	0.000446	0.000777	0.00032	0.000544	0.007427	0.000334
Maribellus comscasis	Bacteria	55.914	0.00168	0.001754	0.002028	0.001198	0.001849	0.001833	0.00159	0.00077	0.002398	0.001185	0.002185	0.001088	0.001561	0.001526	0.001677	0.002592	0.001578
Paracoccus kondratievae	Bacteria	58.0645	0.001679	0.002867	0.002652	0.002653	0.001913	0.000923	0.000562	0.000719	0.001225	0.001373	0.001992	0.000585	0.002303	0.001673	0.001019	0.002609	0.001816
Mycobacterium mantenii	Bacteria	50.5376	0.001672	0.001364	0.000779	0.003775	0.001653	0.000791	0.002235	0.001782	0.000859	0.002055	0.001281	0.001772	0.000806	0.001361	0.001143	0.002131	0.002787
Grimontia hollisae	Bacteria	58.0645	0.001671	0.000867	0.000636	0.002889	0.001702	0.000477	0.003175	0.002741	0.000797	0.001883	0.001454	0.002497	0.001032	0.000996	0.000559	0.002424	0.002487
Cupriavidus sp. EM10	Bacteria	51.6129	0.001662	0.001366	0.000673	0.002177	0.001775	0.000718	0.004437	0.000325	0.001546	0.001431	0.001898	0.001182	0.001757	0.000526	0.001788	0.00339	0.001155
Tautonia plasticadhaerens	Bacteria	50.5376	0.00166	0.001063	0.00014	0.002066	0.000195	0.000541	0.000965	0.007985	0.000601	0.002231	0.001077	0.000719	0.000351	0.000648	0.001322	0.005835	0.0009
Suicoccus acidiformans	Bacteria	51.6129	0.001657	0.000363	0.000538	0.004086	0.003775	0.000357	0.001011	0.000599	0.002251	0.00161	0.001705	0.000708	0.002399	0.002104	0.001192	0.002908	0.000626
Vibrio parahaemolyticus	Bacteria	65.5914	0.001651	0.000815	0.001517	0.002338	0.001207	0.000866	0.001982	0.00194	0.002548	0.001616	0.001687	0.002017	0.001547	0.001816	0.001737	0.00195	0.000884
Paenibacillus yonginensis	Bacteria	62.3656	0.001646	0.002543	0.000961	0.003543	0.000497	0.002258	0.001527	0.001083	0.000597	0.001806	0.001483	0.001802	0.000877	0.001716	0.0029	0.00057	0.002032
Stenotrophomonas sp. 364	Bacteria	53.7634	0.001645	0.001936	0.001132	0.002515	0.000672	0.000976	0.002398	0.001532	0.001903	0.000999	0.002305	0.000683	0.001482	0.001466	0.002747	0.002653	0.000755
Neisseria macacae	Bacteria	26.8817	0.001632	0.002669	0.0001	0.000937	0	0.005166	0.000432	0.002139	0.001404	0.002476	0.00077	0.000547	0.000601	0.000157	0.004334	0.000875	0.003027
Leuconostoc citreum	Bacteria	25.8065	0.00163	0.002336	0.002374	0.000355	0.000134	0.002915	0.000112	6.3e-05	0.004745	0.002246	0.001001	0.001554	0.002018	0.001015	0.00192	0.001299	0.001893
Cytophaga hutchinsonii	Bacteria	68.8172	0.001629	0.002159	0.000709	0.002553	0.000798	0.00158	0.00201	0.001437	0.001614	0.001334	0.00193	0.001264	0.001039	0.001401	0.001846	0.002473	0.001699
Corynebacterium kefirresidentii	Bacteria	36.5591	0.00158	0.000443	0.00019	0.000412	0.002656	0.000919	0.002576	0.003677	0.001712	0.002371	0.000772	0.000806	0.001737	0.002217	0.001567	0.002424	0.000761
Leuconostoc mesenteroides	Bacteria	38.7097	0.001577	0.001681	0.001039	0.000365	0.000868	0.002752	0.000422	0.000668	0.004658	0.002374	0.000764	0.001577	0.001497	0.001295	0.00234	0.000485	0.002234
Haemophilus parainfluenzae	Bacteria	54.8387	0.001573	0.000675	0.00088	0.00263	0.000328	0.000851	0.001908	0.002286	0.002968	0.001782	0.001359	0.000837	0.001811	0.001417	0.001485	0.002009	0.001812
Bacillus velezensis	Bacteria	41.9355	0.001572	0.000557	0.005698	0.002358	0.000699	0.000384	0.000804	0.001638	0.001132	0.001949	0.001188	0.000985	0.000399	0.001131	0.001438	0.001536	0.003853
Limosilactobacillus vaginalis	Bacteria	31.1828	0.00156	3.1e-05	0.002221	0.002254	0.000142	0.002766	0.001391	0.002851	0.001043	0.000813	0.002323	9.3e-05	0.00413	0.001619	0.001624	0.000333	0.001479
Methylobacterium radiotolerans	Bacteria	18.2796	0.001556	3.7e-05	0.000646	0.000345	0.000431	9.3e-05	0.001084	0.009467	0.000854	0.002505	0.000587	0.000746	0.001097	0.000212	0.000867	0.006144	5.2e-05
Rhizobium sp. SL42	Bacteria	44.086	0.001556	0.000482	0.00315	0.002636	0.00228	0.001557	0.00106	0.000704	0.000771	0.001748	0.001359	0.001863	0.001757	0.002565	0.001283	0.00152	0.000491
Brevibacillus laterosporus	Bacteria	58.0645	0.001547	0.000857	0.00119	0.001496	0.000807	0.000714	0.003421	0.000654	0.003103	0.001368	0.00173	0.001946	0.001472	0.000878	0.001444	0.002806	0.000676
Sphingomonas sp. PAMC26645	Bacteria	15.0538	0.001544	2e-06	0.000118	0.000203	0	2e-05	0.000184	0.012427	7e-05	0.002943	0.000115	0.00015	0.00026	0	0.000112	0.008462	1e-06
Bradyrhizobium symbiodeficiens	Bacteria	47.3118	0.001542	0.000852	0.000638	0.001239	0.00122	0.005106	0.000933	0.001658	0.000549	0.001536	0.001548	0.000243	0.001396	0.000691	0.004178	0.002145	0.000411
Hymenobacter sp. BT18	Bacteria	54.8387	0.001531	0.00398	0.000309	0.003448	0.000329	0.000797	0.002202	0.000646	0.000258	0.001645	0.001414	0.001403	0.0013	0.001003	0.00212	0.002631	0.000654
Proteus mirabilis	Bacteria	46.2366	0.001519	0.000622	0.00199	0.002175	0.003996	0.002341	0.000411	5.3e-05	0.000522	0.00169	0.001345	0.001297	0.003747	0.000818	0.000195	0.001883	0.001074
Calothrix sp. PCC 7716	Bacteria	49.4624	0.001515	0.004471	0.000335	0.000526	0.000779	0.000492	0.004055	0.000269	0.000894	0.001762	0.001263	0.002672	0.000903	0.002354	0.000717	0.000405	0.002216
Spirosoma sp. KUDC1026	Bacteria	54.8387	0.001507	0.001868	8.6e-05	0.001239	0.001496	0.001255	0.004027	0.00051	0.001257	0.001592	0.00142	0.002726	0.00135	0.001035	0.000898	0.002689	0.000362
Veillonella atypica	Bacteria	40.8602	0.001506	0.001625	0.000368	0.000658	0.000176	0.000398	0.001767	0.002639	0.004322	0.002223	0.000773	0.00081	0.002261	0.000123	0.004234	0.000439	0.000953
Sinorhizobium fredii	Bacteria	61.2903	0.001506	0.002038	0.00051	0.001993	0.0018	0.001747	0.002241	0.000735	0.000753	0.001145	0.001874	0.001526	0.001921	0.001842	0.001293	0.002073	0.000423
Chitinophaga sp. KRA15-503	Bacteria	56.9892	0.001505	0.002415	0.000616	0.002012	0.00167	0.001282	0.001399	0.000177	0.002214	0.001448	0.001563	0.00151	0.001732	0.001829	0.00098	0.002174	0.000848
Streptococcus sp. NSJ-72	Bacteria	29.0323	0.001494	0.001145	0.000749	0.001028	6.3e-05	0.001247	0.003904	0.001818	0.001904	0.001558	0.001429	0.000843	0.001766	0.001007	0.00166	0.000364	0.003226
Klebsiella aerogenes	Bacteria	55.914	0.001493	0.000362	0.003146	0.001117	0.001294	0.00112	0.00128	0.002238	0.001726	0.000968	0.00203	0.00147	0.002077	0.002263	0.000373	0.001953	0.000918
Lachnoclostridium phytofermentans	Bacteria	45.1613	0.001484	0.001404	0.001557	0.001443	0.000817	0.000601	0.000859	0.001251	0.00393	0.001679	0.001284	0.001461	0.001373	0.002333	0.001713	0.001173	0.000954
Enterococcus mundtii	Bacteria	53.7634	0.001482	0.000366	0.00051	0.000931	0.005522	0.000982	0.000632	0.001157	0.001565	0.001643	0.001317	0.001423	0.000725	0.001405	0.000785	0.00406	0.000479
Anaerotignum propionicum	Bacteria	45.1613	0.001473	0.000338	0.002509	0.002953	0.000178	0.000259	0.001026	0.003617	0.001256	0.000909	0.002049	0.000657	0.001122	0.002461	0.002435	0.000349	0.001887
Serpentinicella alkaliphila	Bacteria	37.6344	0.001465	0.000143	0.000198	0.000136	0.000135	0.004344	0.005438	0.00053	0.000508	0.002703	0.000201	0.004488	0.000196	0.000193	0.003385	0.000409	0.000149
Delftia acidovorans	Bacteria	45.1613	0.001459	0.000268	0.007589	0.002093	0.000472	0.000298	0.00074	0.000728	0.000444	0.002292	0.000607	0.000338	0.000676	0.001666	0.00056	0.004966	0.000505
Rossellomorea vietnamensis	Bacteria	60.2151	0.001457	0.000753	0.001137	0.0033	0.000342	0.001435	0.001895	0.002213	0.000589	0.001098	0.001823	0.00114	0.001994	0.001178	0.001195	0.002736	0.000445
Prevotella scopos	Bacteria	29.0323	0.001452	3.3e-05	0.001355	0.002631	0.000105	0.000375	0.005173	0.001679	0.00027	0.001034	0.00188	0.000233	0.000585	0.003894	0.00266	0.000635	0.000936
Flavobacterium sp. F-323	Bacteria	56.9892	0.001447	0.002049	0.000889	0.001508	0.001184	0.001292	0.001525	0.002635	0.000503	0.001233	0.001666	0.001036	0.001124	0.002196	0.001856	0.001804	0.000736
Scardovia inopinata	Bacteria	43.0108	0.001447	0.003138	0.00073	0.001254	3.3e-05	0.000117	0.002561	0.002577	0.001137	0.001724	0.001163	0.0002	0.001271	0.000363	0.001077	0.000922	0.004633
Prevotella sp. Rep29	Bacteria	33.3333	0.001435	3.3e-05	0.000119	0.007102	0.000158	0.00276	0.000292	0.00046	0.000256	0.000922	0.001959	0.001148	0.000306	4.3e-05	0.000372	0.002137	0.004414
Desulfovibrio desulfuricans	Bacteria	38.7097	0.001435	0.000204	0.002739	0.002415	4.5e-05	3.1e-05	0.001069	0.005061	0.000433	0.000939	0.001941	0.001512	0.000511	0.000915	0.00226	0.001385	0.001965
Xylophilus rhododendri	Bacteria	23.6559	0.001434	0.000199	0.01247	7.6e-05	1.6e-05	8e-06	2.5e-05	0.00039	4.1e-05	0.002692	0.000149	0.008197	0.00016	0.000184	4.9e-05	0.000134	0.000146
Pasteurella multocida	Bacteria	55.914	0.001433	0.000637	0.000832	0.003575	0.00067	0.00082	0.002199	0.001606	0.00104	0.001385	0.001482	0.001032	0.000746	0.001376	0.000864	0.002486	0.00206
Legionella adelaidensis	Bacteria	51.6129	0.001423	0.001288	0.000942	0.002356	0.001971	0.002159	0.000871	0.001435	0.000286	0.001025	0.00183	0.000727	0.001001	0.001671	0.001405	0.002841	0.000882
Nocardioides sp. CF8	Bacteria	41.9355	0.001422	0.000752	2.2e-05	0.00213	0.002192	0.000251	0.003813	0.000717	0.001208	0.001136	0.001715	0.000862	0.002034	0.000493	0.001033	0.002493	0.001467
Rothia aeria	Bacteria	40.8602	0.001417	0.000336	0.000397	0.000284	1.2e-05	0.000183	0.006005	0.003156	0.000941	0.000838	0.002009	0.000467	0.001211	0.000213	0.001165	0.001675	0.003565
Spirosoma endbachense	Bacteria	61.2903	0.001413	0.002098	0.000599	0.002271	0.001453	0.000457	0.001488	0.00179	0.001041	0.001305	0.001523	0.000725	0.001054	0.002031	0.000548	0.002471	0.00168
Desulfosarcina alkanivorans	Bacteria	54.8387	0.001411	0.002094	0.000599	0.003333	0.001076	0.000327	0.001756	0.000584	0.001314	0.001234	0.001592	0.000779	0.000986	0.001353	0.001094	0.001419	0.002789
Candidatus Erwinia haradaeae	Bacteria	61.2903	0.001407	0.00151	0.000565	0.003072	0.001362	0.001583	0.001552	0.000448	0.000939	0.000958	0.001865	0.000904	0.001532	0.001377	0.001987	0.001541	0.001063
Vibrio bathopelagicus	Bacteria	26.8817	0.001404	0.002215	0.000287	0.000603	0.00356	0.002019	0.000915	0.000333	0.001022	0.001812	0.000987	6e-06	0.000188	0.001197	0.00156	0.004003	0.001356
Alkalihalobacillus clausii	Bacteria	60.2151	0.001403	0.001482	0.000691	0.003313	0.00072	0.001015	0.00211	0.000948	0.000785	0.001094	0.001718	0.000459	0.002252	0.001917	0.001414	0.00182	0.000559
Caldilinea aerophila	Bacteria	49.4624	0.001391	0.000854	0.002179	0.000748	0.000317	0.000992	0.000944	0.004954	0.000566	0.001477	0.001302	0.000166	0.000749	0.00406	0.000476	0.001643	0.001508
Sinorhizobium americanum	Bacteria	39.7849	0.001387	0.00087	0.000237	0.000673	0.004481	0.000464	0.003153	0.000825	0.000155	0.001352	0.001423	0.000812	0.002763	0.002089	0.000247	0.001798	0.000664
Slackia heliotrinireducens	Bacteria	43.0108	0.001374	0.0024	0.001166	0.000985	0.000352	0.001512	0.000698	0.00141	0.002441	0.001473	0.001274	0.001298	0.001711	0.001087	0.002483	0.00084	0.000785
Dissulfurispira thermophila	Bacteria	50.5376	0.001363	0.00269	0.000428	0.002646	0.000166	0.000894	0.002893	0.000272	0.000666	0.000903	0.001833	0.001645	0.001033	0.001254	0.001766	0.001668	0.000815
Paraburkholderia terrae	Bacteria	47.3118	0.00135	0.000618	0.005207	0.00097	0.000163	0.000759	0.000316	0.002419	0.001077	0.001652	0.001041	0.00321	0.000609	0.000889	0.000823	0.002138	0.000488
Gardnerella piotii	Bacteria	19.3548	0.001344	2e-05	0.000138	8.2e-05	2e-06	0.000159	0.000131	0.000552	0.009397	0.002605	5.5e-05	9e-06	0.000532	7e-05	0.006959	0.000106	0.000143
Anoxybacillus amylolyticus	Bacteria	31.1828	0.001337	0.000301	0.00057	0.000849	2.2e-05	0.000402	0.003762	0.003278	0.001549	0.00138	0.001294	0.002715	0.001119	0.000213	0.000705	0.002355	0.000864
Neisseria elongata	Bacteria	30.1075	0.001335	0.001366	5.7e-05	1.8e-05	3e-06	0.000611	0.007219	0.001073	9.6e-05	0.000644	0.002041	9.5e-05	4e-05	0.000522	0.000477	0.000348	0.006349
Vibrio tritonius	Bacteria	24.7312	0.001333	0	0.003514	0.000569	0.00185	0.000214	0.004153	0.000429	0.000221	0.001043	0.001629	0.002639	0.001146	0.000151	0.003102	0.000778	0.000113
Microbacterium aurum	Bacteria	26.8817	0.001326	0.002214	0.00013	2.7e-05	7e-06	7e-06	0.007038	0.000763	0.000173	0.000719	0.001946	7.3e-05	0.000297	0.000106	9.9e-05	0.000277	0.006872
Streptococcus sobrinus	Bacteria	36.5591	0.001314	9.8e-05	0.001804	0.002026	0.0007	0.000817	0.000601	0.001995	0.00261	0.000953	0.001683	0.000626	0.002114	0.002428	0.000927	0.000159	0.001728
Streptomyces sp. GQFP	Bacteria	62.3656	0.001306	0.001664	0.000803	0.001732	0.000795	0.001877	0.001283	0.001689	0.000552	0.000901	0.001719	0.000767	0.001139	0.001676	0.001932	0.00175	0.000583
Shewanella sp. OM3-2	Bacteria	41.9355	0.001294	0.001135	0.000222	0.000959	0.000901	0.001565	0.003255	0.00114	0.000986	0.001201	0.001389	0.002311	0.001556	0.00093	0.000428	0.001864	0.000695
Veillonella sp. S12025-13	Bacteria	30.1075	0.001293	0.001138	8.8e-05	0.001579	3.5e-05	0.000246	0.002688	0.001085	0.003269	0.001973	0.000599	0.000637	0.001365	5.2e-05	0.003632	0.000338	0.001539
Streptococcus canis	Bacteria	35.4839	0.001292	0.002378	0.000544	0.00096	0.002578	0.000504	0.001204	0.000474	0.001503	0.000898	0.001695	0.002863	0.001391	0.00059	0.000666	0.0011	0.001153
Halobacteriovorax sp. BALOs_7	Bacteria	44.086	0.001291	0.00062	0.000265	0.002265	0.001385	0.000209	0.003152	0.001242	0.001016	0.001097	0.001489	0.001335	0.001229	0.000199	0.002044	0.002651	0.000155
Metabacillus sediminilitoris	Bacteria	58.0645	0.001285	0.002436	0.001047	0.001175	0.000617	0.000951	0.00126	0.000539	0.002151	0.000948	0.001628	0.000834	0.000668	0.000637	0.000794	0.003744	0.000922
Cutibacterium modestum	Bacteria	39.7849	0.001284	3.1e-05	0.002517	0.001143	0.001507	0.000507	0.002512	0.001518	0.000761	0.001724	0.000835	0.001712	0.000275	0.000391	0.001674	0.001761	0.001806
Streptococcus gwangjuense	Bacteria	35.4839	0.001283	0.001685	0.000376	0.00064	7.1e-05	0.001225	0.001609	0.002617	0.001997	0.001503	0.001057	0.000539	0.001086	0.001526	0.002712	0.000223	0.001594
Enterococcus sp. M190262	Bacteria	15.0538	0.00128	6e-06	3.2e-05	0.00011	0.003379	2e-06	0	0.001459	0.005057	0.001297	0.001262	0.002716	0.001025	0.002699	0	0.001417	8.8e-05
Butyrivibrio proteoclasticus	Bacteria	37.6344	0.001278	0.001319	0.001395	0.001224	0.000497	0.000644	0.000896	0.000446	0.003751	0.001452	0.0011	0.001402	0.001319	0.002315	0.00182	0.000303	0.000645
Thermus sp. NEB1569	Bacteria	22.5806	0.001275	2.1e-05	0.001471	0.000793	1.9e-05	0.000561	0.002849	0.00286	0.001792	0.001258	0.001292	0.002191	0.000974	0.000775	0.001174	0.002014	0.000516
Paenibacillus lentus	Bacteria	61.2903	0.001271	0.000906	0.000605	0.001145	0.001685	0.001546	0.001348	0.002263	0.000642	0.001261	0.001281	0.000874	0.000765	0.001897	0.002217	0.000926	0.001
Peptoniphilus harei	Bacteria	33.3333	0.00127	0.002347	0.000261	4e-05	0.000108	0.000165	0.000318	0.00648	0.000709	0.001918	0.000608	0.00032	0.004662	0.000478	0.000399	0.001386	0.000218
Staphylococcus saprophyticus	Bacteria	39.7849	0.001258	0.000713	0.000835	0.000628	7.5e-05	0.000416	0.006564	0.000186	0.000486	0.000669	0.001859	0.000192	0.004813	0.000216	0.00031	0.000923	0.000895
Corynebacterium tuberculostearicum	Bacteria	37.6344	0.001257	0.00017	0.000592	0.001152	1.4e-05	5.2e-05	0.001728	0.003794	0.002657	0.001374	0.001138	0.00065	0.002732	0.001714	0.000769	0.001334	0.000365
Corynebacterium striatum	Bacteria	38.7097	0.001253	0.000827	0.000268	0.000222	0.000122	0.000836	0.000187	0.007228	0.000671	0.001344	0.001161	0.000474	0.002068	0.003217	0.000461	0.001271	0.000225
Lactococcus garvieae	Bacteria	36.5591	0.001248	0.000137	0.000421	0.002039	0.005071	0.000278	0.000228	0.000972	0.000679	0.000722	0.001786	0.000339	0.000432	0.00017	0.000699	0.001834	0.003823
Nitrosomonas eutropha	Bacteria	52.6882	0.001246	0.000925	0.000651	0.002764	0.000271	0.001944	0.001362	0.000904	0.00102	0.001135	0.00136	0.000533	0.001138	0.00196	0.001526	0.001859	0.000505
Salmonella bongori	Bacteria	36.5591	0.001246	0.000283	0.004345	0.00049	0.001019	0.000748	0.002996	6.1e-05	0.000445	0.000318	0.002194	0.000382	0.000532	0.003253	0.000156	0.00309	0.000259
Klebsiella oxytoca	Bacteria	46.2366	0.001246	0.000279	0.004097	0.00051	0.001599	0.001128	0.00118	0.001187	0.000458	0.000665	0.001839	0.001465	0.002149	0.001682	0.000473	0.00126	0.000515
Bradyrhizobium guangxiense	Bacteria	45.1613	0.001242	0.001994	0.000145	0.001696	0.001085	0.000621	0.001414	0.002017	0.000846	0.001328	0.001154	0.001306	0.001069	0.001845	0.000802	0.001977	0.000534
Geobacter sp. FeAm09	Bacteria	41.9355	0.001242	0.000552	6.9e-05	0.000449	0.000705	0.000321	0.004388	0.003403	3.4e-05	0.000332	0.002172	0.000378	0.001134	0.002718	0.002902	0.000114	0.000336
Staphylococcus warneri	Bacteria	16.129	0.001241	0.002282	0.000544	0.002129	0.000173	0.000635	0.003205	0.00042	0.000352	0.001642	0.000831	0.000153	0.001959	0.002595	0.000197	0.002239	0.000401
Moraxella nonliquefaciens	Bacteria	34.4086	0.001238	0.000384	0.004462	0.001625	5.5e-05	0.000693	0.002192	0.000764	0.000228	0.001737	0.000729	0.004579	0.000745	0.000493	0.000966	0.000484	0.000277
Spirosoma sp. KCTC 72228	Bacteria	47.3118	0.00122	0.000862	0.000823	0.002154	0.001424	0.001514	0.001315	0.001282	0.000323	0.000704	0.001747	0.000437	0.002077	0.001621	0.000885	0.001848	0.000451
Streptococcus pluranimalium	Bacteria	34.4086	0.00122	0.001778	0.001162	0.001231	0.002481	0.000352	0.000289	0.000256	0.002117	0.000795	0.001653	0.002172	0.000928	0.000941	0.000408	0.001376	0.001517
Butyrivibrio hungatei	Bacteria	37.6344	0.001215	0.001212	0.001414	0.000612	0.000518	0.00033	0.001003	0.000903	0.003732	0.001196	0.001233	0.00095	0.00152	0.001798	0.001936	0.000385	0.000756
Mobiluncus curtisii	Bacteria	26.8817	0.001209	0.003713	2.6e-05	0.000728	2.3e-05	0.000176	0.004177	0.000322	0.000239	0.001374	0.001042	0.003154	0.003325	5.7e-05	0.000672	0	2.6e-05
Couchioplanes caeruleus	Bacteria	53.7634	0.001208	0.000544	0.000573	0.002627	0.00197	0.000802	0.001241	0.001178	0.000619	0.001354	0.001058	0.000714	0.001117	0.000637	0.000636	0.002323	0.001718
Streptococcus sp. 116-D4	Bacteria	34.4086	0.001205	0.001942	0.000486	0.001052	0.000585	0.000712	0.00108	0.002332	0.001428	0.00127	0.001139	0.000993	0.00079	0.000771	0.003416	0.00014	0.001053
Paraburkholderia aromaticivorans	Bacteria	56.9892	0.001203	0.000445	0.000855	0.001454	0.000775	0.000657	0.003125	0.001579	0.000708	0.001024	0.001386	0.00067	0.000578	0.000788	0.001361	0.001232	0.002504
Campylobacter showae	Bacteria	26.8817	0.001203	0.007863	0.000476	0.000102	5e-06	4e-06	0.000823	6e-05	7.3e-05	0.001589	0.000808	0.000234	0.000304	3.9e-05	6.6e-05	0.000458	0.005911
Sodaliphilus pleomorphus	Bacteria	37.6344	0.001193	0.000375	0.00118	0.002712	0.000975	0.002647	0.00027	0.000976	0.000392	0.001115	0.001273	0.001299	0.001698	4.1e-05	0.000282	0.00132	0.002384
Theileria annulata	Bacteria	58.0645	0.001183	0.001465	0.00068	0.002317	0.001206	0.001018	0.002176	0.000174	0.000257	0.001	0.001369	0.000597	0.000849	0.001157	0.001002	0.001548	0.001903
Companilactobacillus paralimentarius	Bacteria	25.8065	0.001177	4.6e-05	0.003517	0.000294	9.1e-05	4.3e-05	0.001041	0.000297	0.0044	0.001944	0.000393	0.0001	0.002224	0.002982	0.000884	0.000242	0.000788
Prevotella nigrescens	Bacteria	34.4086	0.001173	6.7e-05	0.001113	0.003445	0.000217	0.002202	0.000267	0.001086	0.000966	0.001155	0.001191	0.000524	0.001253	0.000293	0.000881	0.001048	0.002886
Limosilactobacillus panis	Bacteria	24.7312	0.001169	0.004617	0.003419	2.3e-05	3.8e-05	0.000225	0.000105	0.001223	8.3e-05	0.000987	0.001355	3.4e-05	0.000943	3.4e-05	0.004639	0	0.001151
Protaetiibacter intestinalis	Bacteria	56.9892	0.001169	0.001552	0.0007	0.002052	0.000978	0.000954	0.001129	0.000518	0.001334	0.000742	0.001604	0.000803	0.000978	0.001031	0.001421	0.001944	0.000794
Clostridium cadaveris	Bacteria	44.086	0.001168	0.001515	0.000919	0.000689	0.000484	0.000867	0.000861	0.000798	0.003141	0.001315	0.001019	0.001365	0.001616	0.00123	0.001749	0.000196	0.000873
Mycobacterium sp. DL440	Bacteria	32.2581	0.001162	3.7e-05	0.000795	0.00427	0.001555	2.4e-05	0.000513	0.000457	0.001525	0.00049	0.001849	0.000215	0.002171	4e-05	5.3e-05	0.003992	0.000302
Streptomyces ambofaciens	Bacteria	40.8602	0.001157	0.001138	0.000602	0.000745	0.002053	0.000484	0.002576	0.000113	0.001363	0.00089	0.001429	5e-05	0.000486	0.000488	0.000464	0.002508	0.00279
Fusobacterium nucleatum	Bacteria	56.9892	0.001156	0.001001	0.000397	0.000877	0.000458	0.000647	0.001151	0.002023	0.002643	0.000986	0.00133	0.000846	0.00092	0.000775	0.001546	0.001779	0.001005
Cupriavidus basilensis	Bacteria	41.9355	0.001155	0.002132	0.000862	0.001023	9.9e-05	0.000361	0.001776	0.001093	0.00184	0.000924	0.001391	0.001361	0.000493	0.000522	0.001628	0.002409	0.000451
Ornithobacterium rhinotracheale	Bacteria	53.7634	0.001154	0.000495	0.000712	0.001564	0.001475	0.001354	0.001453	0.000902	0.001183	0.001258	0.001048	0.001694	0.001809	0.000443	0.000455	0.001456	0.001011
Lactococcus raffinolactis	Bacteria	39.7849	0.00115	0.002756	0.000591	0.002251	0.000181	0.001285	0.000182	0.000139	0.001636	0.001274	0.001023	0.000427	0.000812	0.002615	0.000451	0.001536	0.001196
Synechococcus sp. PCC 7002	Bacteria	27.957	0.001147	0.001752	0.000783	0.003747	0.000698	0.000299	0.001255	0.000155	0.000345	0.001325	0.000965	0.000802	0.000967	0.002663	0.000933	0.000574	0.001112
Parascardovia denticolens	Bacteria	34.4086	0.001143	0.000405	0.001787	0.000277	0.000467	0.000663	0.000266	0.00167	0.003761	0.001418	0.000862	0.000502	0.002069	0.001335	0.00105	0.000206	0.00168
Campylobacter concisus	Bacteria	52.6882	0.001134	0.000374	0.000999	0.00344	0.001123	0.000392	0.000769	0.000487	0.001414	0.000659	0.00162	0.000201	0.001733	0.000196	0.000591	0.003365	0.000545
Aminipila butyrica	Bacteria	51.6129	0.001132	0.000823	0.000799	0.001076	0.000725	0.000516	0.001481	0.001726	0.001908	0.000989	0.001279	0.001578	0.002046	0.000956	0.000708	0.000989	0.000523
Saccharibacillus brassicae	Bacteria	53.7634	0.001123	0.002678	0.00044	0.002562	0.0008	0.000307	0.000717	0.000648	0.000674	0.000832	0.00142	0.001012	0.001081	0.000681	0.002198	0.000965	0.000735
Stenotrophomonas acidaminiphila	Bacteria	43.0108	0.001118	0.00303	0.000941	0.002029	0.000755	0.000503	0.000274	0.000748	0.000602	0.00093	0.00131	0.000316	0.000986	0.001069	0.001157	0.000845	0.002278
Vibrio harveyi	Bacteria	45.1613	0.001114	0.000913	0.000943	0.00215	0.000348	0.001156	0.00225	0.000796	0.0003	0.000861	0.001372	0.001157	0.000588	0.001272	0.000434	0.002655	0.0006
Porphyromonas somerae	Bacteria	39.7849	0.001112	0.000327	0.002111	0.001478	0.001338	0.002223	0.000149	0.00122	0.000228	0.000881	0.001349	0.002265	0.002394	0.000302	8.7e-05	0.000345	0.001251
Vibrio campbellii	Bacteria	31.1828	0.001112	0.000649	0.000155	0.005194	0.000896	0.000864	0.000811	2.7e-05	4.6e-05	0.001501	0.000714	0.000254	0.000606	0.003187	0.000699	0.001504	0.000626
Bradyrhizobium quebecense	Bacteria	29.0323	0.001109	0.000536	0.000403	0.002748	0.002618	0.000114	0.000119	0.001985	0.000309	0.0015	0.00071	9.1e-05	0.000794	0.001407	0.00046	0.003305	0.000574
Mesorhizobium sp. 131-2-1	Bacteria	23.6559	0.001109	0.001285	0.000173	0	0.000863	0.002245	0.000208	0.001953	0.002055	0.000889	0.001333	2.6e-05	1.5e-05	0.000975	0.00089	0.004385	0.000276
Lysinibacillus sphaericus	Bacteria	53.7634	0.001104	0.002035	0.000119	0.001955	0.002114	0.000349	0.001312	9.2e-05	0.000606	0.000402	0.001821	0.00058	0.001298	0.000815	0.000882	0.002581	0.000398
Bradyrhizobium canariense	Bacteria	19.3548	0.001103	0.000292	7.8e-05	1.2e-05	8.1e-05	2.2e-05	7e-06	0.008425	0.00035	0.002051	0.000135	0.000143	0.000317	8e-05	0.000136	0.005685	7e-05
Burkholderia cepacia	Bacteria	43.0108	0.001103	2.7e-05	0.0004	0.000403	0.000674	0.000207	0.003395	0.003543	0.000259	0.001068	0.001138	0.00325	0.000682	0.000814	0.00042	0.001463	8.6e-05
Sphaerospermopsis torques-reginae	Bacteria	19.3548	0.001103	1.5e-05	0.000367	0.000107	4.3e-05	0.00792	0.000113	0	4.1e-05	0.002024	0.000161	1.6e-05	1.4e-05	0.000185	0.005907	3.5e-05	0.000276
Vibrio cyclitrophicus	Bacteria	44.086	0.001102	0.001075	0.000585	0.000807	0.001258	0.000426	0.003881	0.000258	0.000371	0.000987	0.001219	0.001203	0.002311	0.001932	0.000555	0.000263	0.000459
Desulfovibrio vulgaris	Bacteria	36.5591	0.001099	0.000211	0.002465	0.000944	3.3e-05	6.1e-05	0.001382	0.003845	0.00031	0.000661	0.001546	0.000345	0.000364	0.000841	0.002472	0.000694	0.0018
Jiangella alkaliphila	Bacteria	54.8387	0.001098	0.001075	0.000395	0.001466	0.001242	0.000293	0.000572	0.003472	0.000352	0.001443	0.000746	0.001732	0.000834	0.001611	0.00053	0.001542	0.000444
Phaeobacter inhibens	Bacteria	51.6129	0.001091	0.002142	0.000133	0.001646	0.000494	0.000475	0.001709	0.000848	0.001103	0.001323	0.000854	0.001572	0.000627	0.00043	0.000384	0.000824	0.002657
Buchnera aphidicola	Bacteria	65.5914	0.001078	0.002709	0.000848	0.001429	0.00057	0.000733	0.00132	0.000502	0.000426	0.001066	0.00109	0.000976	0.000799	0.002254	0.000934	0.001098	0.000547
Pseudomonas qingdaonensis	Bacteria	49.4624	0.001071	0.00113	0.000974	0.002637	0.000669	0.000558	0.000649	0.001223	0.000721	0.001168	0.000971	0.001284	0.000778	0.002024	0.000629	0.00081	0.00103
Streptomyces venezuelae	Bacteria	48.3871	0.001069	0.000184	0.000238	0.000507	0.000454	0.000283	0.002284	0.004178	0.000542	0.001491	0.000637	0.000392	0.000465	0.002271	0.000478	0.002567	0.000346
Acinetobacter johnsonii	Bacteria	43.0108	0.001068	0.000221	0.000192	0.000748	0.003474	0.000491	0.000894	0.00015	0.002148	0.00107	0.001065	0.000194	0.000175	0.000322	0.000856	0.004653	5.7e-05
Bradyrhizobium japonicum	Bacteria	31.1828	0.001065	0.004667	0.000233	0.00049	0.000218	1.3e-05	0.00037	0.002222	0.000261	0.001798	0.000315	0.000322	0.000528	0.004109	0.000171	0.001483	0.00011
Vallitalea pronyensis	Bacteria	61.2903	0.001062	0.000755	0.001054	0.001851	0.000587	0.00124	0.000808	0.000745	0.00143	0.001093	0.001031	0.000906	0.00081	0.001172	0.00099	0.001155	0.001344
Elizabethkingia ursingii	Bacteria	17.2043	0.001062	1.6e-05	1.2e-05	1.9e-05	1.6e-05	3e-06	0.002161	0.006483	6.3e-05	0.000577	0.001558	0.001746	3.1e-05	0.005092	4e-05	0	1e-05
Rheinheimera sp. D18	Bacteria	29.0323	0.00106	1.8e-05	0.00088	0.000539	2e-05	0.000579	0.003637	0.001251	0.001545	0.000724	0.001405	0.002726	0.000549	0.000851	0.000739	0.001224	0.000351
Microbacterium paraoxydans	Bacteria	16.129	0.00106	2.8e-05	0.000861	0.000285	4.1e-05	0.000153	0.000869	0.00476	0.00176	0.001725	0.000381	0.000718	0.001142	0.000175	0.001213	0.002447	0.000535
Paeniclostridium sordellii	Bacteria	43.0108	0.001057	0.000398	0.001907	0.000942	5.6e-05	0.000254	0.001054	0.000249	0.003667	0.001308	0.0008	0.000326	0.001572	0.00242	0.000833	0.000222	0.001092
Mycolicibacterium austroafricanum	Bacteria	30.1075	0.001054	7.4e-05	0.000673	0.002933	0.000941	4.7e-05	0.000253	0.002134	0.001402	0.000838	0.001274	5.7e-05	0.001421	8.3e-05	0.000289	0.004018	0.000271
Raoultella ornithinolytica	Bacteria	27.957	0.001052	0.000165	0.003041	0.000502	0.00143	0.000172	0.00193	0.000747	0.00074	0.000264	0.001858	0.000419	0.000727	0.002985	8.7e-05	0.001967	0.000332
Bacillus sp. LJBV19	Bacteria	39.7849	0.001051	0.000932	0.000882	0.001748	0.000767	0.000642	0.000904	0.002287	0.000321	0.00059	0.001522	0.00063	0.001037	0.001594	0.001789	0.000752	0.000547
Streptococcus sp. NCTC 11567	Bacteria	22.5806	0.001046	0.001321	0.000842	0.000858	0.000245	0.000562	0.001486	0.000471	0.002502	0.001455	0.000628	0.000818	0.001136	0.001453	0.002355	0	0.00055
Berryella intestinalis	Bacteria	36.5591	0.001045	0.001823	0.001635	0.000558	0.000225	0.001502	0.000189	0.001012	0.001513	0.000886	0.001208	0.000889	0.001382	0.00057	0.001921	9.9e-05	0.001341
Muribaculum intestinale	Bacteria	43.0108	0.001045	0.000362	0.001194	0.002422	0.000744	0.001692	0.000632	0.000862	0.000459	0.00079	0.001305	0.002459	0.001495	0.000119	0.000249	0.000564	0.001355
Dyadobacter sandarakinus	Bacteria	50.5376	0.001043	0.001057	0.000279	0.001323	0.000471	0.000562	0.001866	0.001241	0.001437	0.000431	0.001669	0.000299	0.0008	0.001124	0.001711	0.002093	0.000196
Sphingomonas paucimobilis	Bacteria	35.4839	0.001043	0.000274	0.000631	0.000363	2e-05	0.000439	0.003485	0.000746	0.002294	0.000846	0.001245	0.002814	0.000759	4.6e-05	0.001848	0.000237	0.000539
Serratia odorifera	Bacteria	48.3871	0.001041	0.001633	0.00041	0.001104	0.001242	0.00141	0.000563	0.001402	0.00049	0.00082	0.001268	0.001185	0.000769	0.000387	0.001297	0.00167	0.000868
Nibribacter ruber	Bacteria	44.086	0.001037	0.002169	0.000264	0.001158	0.001192	0.000647	0.002395	0.000116	0.00015	0.000942	0.001134	0.002014	0.000794	0.000356	0.000704	0.001621	0.000708
Citrobacter amalonaticus	Bacteria	31.1828	0.001022	6.7e-05	0.003082	0.000571	0.001027	0.000765	0.001888	0.000487	0.000586	0.000366	0.001692	0.000318	0.000371	0.002516	0.000117	0.002498	0.000453
Pediococcus acidilactici	Bacteria	52.6882	0.001015	0.001039	0.00069	0.001064	0.000702	0.000783	0.001045	0.00054	0.002166	0.001043	0.000988	0.000813	0.001123	0.00087	0.001016	0.000895	0.001345
Caulobacter vibrioides	Bacteria	54.8387	0.001015	0.001282	0.000633	0.002058	0.000475	0.001484	0.001146	0.000468	0.000465	0.000783	0.001252	0.000755	0.000819	0.001483	0.001119	0.001492	0.000465
Murdochiella vaginalis	Bacteria	37.6344	0.00101	0.002263	0.000202	0.001184	0.000163	0.000363	0.002349	0.000524	0.000859	0.001248	0.000768	0.001813	0.002033	0.000357	0.001578	5.6e-05	0.000194
Mycobacterium sp. 20KCMC460	Bacteria	19.3548	0.001009	0.000397	0.000645	0.00076	7e-06	0.00029	0.000934	0.00439	0.000868	0.001385	0.000624	0.00037	0.000935	0.00043	0.000504	0.003522	0.000179
Clostridium saccharoperbutylacetonicum	Bacteria	55.914	0.001008	0.001387	0.000581	0.000765	0.000636	0.000951	0.001298	0.000734	0.001621	0.000985	0.001033	0.000732	0.000776	0.001592	0.001146	0.001415	0.000444
Klebsiella africana	Bacteria	33.3333	0.001008	0.000398	0.002046	7.9e-05	0.00103	0.001721	0.000202	0.002769	0.00014	0.000552	0.001474	0.001075	0.00251	0.001372	6.1e-05	0.000329	0.000752
Acidovorax avenae	Bacteria	37.6344	0.001008	0.000471	0.00654	0.000635	6.8e-05	0.00021	0.000182	0.000605	0.000239	0.001663	0.000338	0.004624	0.000202	0.0001	0.000178	0.000739	0.000315
Streptomyces sp. BHT-5-2	Bacteria	46.2366	0.001004	0.000463	0.000774	0.001074	0.00039	0.001844	0.001742	0.001443	0.000298	0.000894	0.001115	0.000152	0.00039	0.002038	0.001321	0.001767	0.00043
Cupriavidus pauculus	Bacteria	45.1613	0.000998	0.000827	0.000391	0.001312	0.000139	0.000237	0.002906	0.000705	0.001343	0.000856	0.001144	0.000995	0.000283	0.001007	0.001002	0.000527	0.002177
Paludisphaera borealis	Bacteria	20.4301	0.000998	9e-06	2.7e-05	1.1e-05	1.9e-05	8e-06	1.6e-05	0.008206	0.000124	0.001942	3.3e-05	3.2e-05	4.6e-05	4.5e-05	7.3e-05	0.005583	2.7e-05
Oscillibacter sp. NSJ-62	Bacteria	41.9355	0.000997	0.001316	0.000673	0.000989	0.000402	0.00049	0.000343	0.001292	0.002447	0.0008	0.0012	0.000785	0.001717	0.001179	0.001389	0.000135	0.00079
Paenibacillus sp. RUD330	Bacteria	26.8817	0.000997	2.5e-05	3.6e-05	0.00014	8.2e-05	6e-05	0.005398	0.000536	0.001504	0.000545	0.00146	0.004364	0.000558	8.3e-05	0.000848	4e-05	0.000186
Alcaligenes faecalis	Bacteria	52.6882	0.000996	0.001568	0.000649	0.001784	0.000347	0.000314	0.002117	0.000386	0.000696	0.000668	0.001332	0.000771	0.001263	0.001361	0.000442	0.000642	0.001528
Pantoea vagans	Bacteria	39.7849	0.000996	0.000122	0.00018	0.00118	0.002875	3.1e-05	0.00187	0.000616	0.000925	0.000466	0.001537	0.000348	0.001604	0.000403	0.000203	0.001176	0.002128
Oceanobacillus kimchii	Bacteria	52.6882	0.000996	0.002349	0.00039	0.001297	0.001087	0.000616	0.000951	0.000758	0.000395	0.001116	0.000872	0.001365	0.001051	0.001469	0.000966	0.000567	0.000637
Methylobacterium brachiatum	Bacteria	30.1075	0.000989	9.3e-05	0.00089	0.00055	1.4e-05	0.000253	0.001544	0.003167	0.001569	0.001215	0.000758	0.001197	0.000979	0.000512	0.001019	0.001887	0.000295
Enterococcus durans	Bacteria	33.3333	0.00098	3.7e-05	0.000455	0.000285	0.002316	4.5e-05	0.000147	0.00242	0.002165	0.0011	0.000856	0.001928	0.000441	0.001017	0.00013	0.001989	0.000437
Flavobacterium sp. F-340	Bacteria	44.086	0.000979	0.002393	0.000734	0.001459	0.00062	0.000587	0.000956	7.5e-05	0.000891	0.000711	0.001252	0.000476	0.001243	0.000751	0.001432	0.001183	0.000728
Gloeocapsa sp. PCC 7428	Bacteria	45.1613	0.000975	0.002446	0.000749	0.001658	0.000768	0.000209	0.000648	0.000859	0.000418	0.000895	0.001057	0.000301	0.000557	0.001489	0.000599	0.000488	0.002438
Paenibacillus naphthalenovorans	Bacteria	33.3333	0.000974	7.6e-05	0.000495	0.000179	3.3e-05	7.7e-05	0.001825	0.003707	0.001551	0.001347	0.000593	0.001355	0.000383	8.2e-05	0.000663	0.002439	0.000836
Delftia tsuruhatensis	Bacteria	35.4839	0.000973	0.002027	0.00412	0.000525	6.2e-05	0.000317	0.00052	0.00021	0.000463	0.001499	0.000436	0.000266	0.000335	0.00189	0.000405	0.002513	0.000497
Bacteroides sp. ZJ-18	Bacteria	15.0538	0.000967	0	0.000469	0.002034	0.000474	0.003904	0.000292	0.000147	0.000269	0.001299	0.000628	0.000605	0.0009	7e-06	0.000208	0.002562	0.001381
Prevotella sp. E9-3	Bacteria	32.2581	0.000967	0.000112	3.2e-05	0.002305	0.000104	0.0045	0.000123	4.1e-05	0.000286	0.001042	0.00089	0.000156	0.002353	0.00014	5.3e-05	0.000644	0.002301
Candidatus Nanosynbacter featherlites	Bacteria	24.7312	0.000964	0.002818	0.000363	6.4e-05	0	0.000159	0.00349	0.000457	0.00022	0.000923	0.001006	0.000141	0.000263	1.9e-05	0.000283	0.000189	0.00472
Citrobacter cronae	Bacteria	10.7527	0.00096	0.00338	0.001117	0.000106	0.0005	0.00154	0.00065	0	0.000332	0.000428	0.001503	0.00011	0.000232	0.000977	7e-06	0.000698	0.003684
Enterococcus cecorum	Bacteria	45.1613	0.00096	0.000511	0.000633	0.000564	0.00107	0.000777	0.00102	0.001163	0.0019	0.000912	0.001008	0.00111	0.000548	0.001234	0.001438	0.000738	0.000732
Desulfovibrio fairfieldensis	Bacteria	33.3333	0.000958	7e-06	0.001473	0.000491	9.1e-05	0.000245	0.002323	0.003139	0.000161	0.000468	0.001458	0.000235	0.000249	0.000302	0.00261	0.000558	0.001666
Providencia rettgeri	Bacteria	50.5376	0.000956	0.001154	0.000741	0.001401	0.000929	0.000597	0.001408	0.000346	0.000986	0.000545	0.001376	0.001304	0.001187	0.000862	0.00121	0.000772	0.00041
Clostridium sporogenes	Bacteria	38.7097	0.000956	0.001174	0.000632	0.001619	0.000471	0.000116	0.00109	0.000589	0.001872	0.001191	0.000716	0.001325	0.001271	0.000892	0.001449	0.00031	0.000502
Hafnia alvei	Bacteria	45.1613	0.000954	0.000714	0.000112	0.000907	0.001568	0.000285	0.002427	0.001038	0.00045	0.000382	0.001539	0.000356	0.001436	0.001282	0.00053	0.000617	0.001508
Actinomyces sp. MAS-1	Bacteria	39.7849	0.000947	0.001815	0.000487	0.000327	2e-05	0.00141	0.000435	0.001357	0.001685	0.001116	0.000776	0.000721	0.001226	0.000229	0.001836	0.000352	0.001217
Acidovorax sp. KKS102	Bacteria	32.2581	0.000943	0.000283	0.003196	0.000269	0.000366	0.000301	0.001522	0.000917	0.00106	0.001221	0.000659	0.001123	0.000532	0.000384	0.000795	0.002566	0.000198
Clostridium sp. JN-1	Bacteria	41.9355	0.000939	0.00032	0.005062	0.000408	5.8e-05	0.000667	0.000241	0.000873	0.000568	0.001321	0.00055	0.000185	0.000438	0.000492	0.00027	0.0032	0.000949
Komagataeibacter oboediens	Bacteria	47.3118	0.000937	0.000149	0.001005	0.002068	0.000936	0.000205	0.001016	0.000719	0.001389	0.000785	0.001091	0.001497	0.001263	0.000436	0.001234	0.000317	0.000845
Prevotella ruminicola	Bacteria	29.0323	0.000936	0.00011	5e-05	0.004215	0.000158	0.001954	6.5e-05	0.000411	0.000331	0.000707	0.001169	0.00011	0.00012	9e-05	0.000327	0.001688	0.003121
Planctomyces sp. SH-PL62	Bacteria	20.4301	0.000935	1.2e-05	6e-05	5.7e-05	3.9e-05	5e-06	0	0.007664	6.1e-05	0.001806	4.6e-05	6.2e-05	4.5e-05	3.8e-05	4.1e-05	0.005235	2.3e-05
Marinomonas arctica	Bacteria	38.7097	0.000934	0.001886	0.000577	0.001996	0.001052	0.000694	0.000368	0.000803	2.9e-05	0.001125	0.000739	0.00071	0.001131	0.000122	0.00052	0.001383	0.001626
Tichowtungia aerotolerans	Bacteria	43.0108	0.000934	0.000552	0.000396	0.000616	0.00013	0.001239	0.000412	0.002157	0.00198	0.000304	0.001578	9.1e-05	5.6e-05	0.002244	0.000353	0.002733	0.000238
Gracilibacillus salitolerans	Bacteria	48.3871	0.000933	0.001177	0.000402	0.001727	0.000115	0.000779	0.001335	0.001328	0.000546	0.001095	0.000768	0.001487	0.000999	0.000751	0.000803	0.000389	0.001184
Sinorhizobium sp. CCBAU 05631	Bacteria	26.8817	0.000929	0.000843	1e-05	0.002504	0.00046	0.000725	0.001093	0.00115	0.000512	0.001176	0.000676	0.000863	0.000808	0.001891	0.000585	0.000822	0.000721
Bradyrhizobium sp. ORS 278	Bacteria	51.6129	0.000926	0.000828	0.000348	0.002096	0.001289	0.000344	0.000344	0.001273	0.000818	0.000949	0.000902	0.00038	0.000467	0.000809	0.001059	0.001994	0.000797
Variovorax sp. PAMC26660	Bacteria	45.1613	0.000925	0.00228	0.000344	0.000703	0.000947	0.000216	0.002041	0.000419	0.000312	0.000586	0.001272	0.000529	0.001011	0.000958	0.000748	0.000742	0.001542
Ottowia sp. oral taxon 894	Bacteria	46.2366	0.000924	0.000372	0.000279	0.002746	0.000507	0.000166	0.001863	0.001232	0.000148	0.000848	0.001003	0.000837	0.000773	0.00161	0.000859	0.000482	0.001065
Blastococcus sp. PRF04-17	Bacteria	21.5054	0.000919	1.9e-05	2.5e-05	8e-06	3e-06	0.000102	3e-06	0.007527	6.9e-05	0.00178	4.1e-05	2.1e-05	5.9e-05	2.5e-05	2.4e-05	0.005192	2.8e-05
Pseudonocardia sp. HH130630-07	Bacteria	24.7312	0.000916	4e-05	0.005727	3e-05	4e-06	9e-06	0.000206	0.002087	0.000124	0.001595	0.000222	0.003925	0.000292	7.3e-05	0.000249	0.001031	8e-06
Aeribacillus pallidus	Bacteria	34.4086	0.000916	3.3e-05	0.00032	0.000589	4.6e-05	0.000457	0.003026	0.001993	0.000855	0.000718	0.001119	0.002323	0.000752	0.000174	0.000518	0.001503	0.00022
Streptococcus pseudoporcinus	Bacteria	35.4839	0.000912	0.00128	0.000345	0.001474	0.00093	0.00055	0.00117	0.000494	0.000925	0.001139	0.00068	0.001604	0.001392	0.000579	0.001296	0.000163	0.00044
Cytobacillus oceanisediminis	Bacteria	48.3871	0.000911	0.000587	0.001231	0.000645	0.000141	0.00039	0.002143	0.00183	0.000453	0.000328	0.001507	0.000426	0.001698	0.000142	0.001626	0.000584	0.000865
Flavobacterium columnare	Bacteria	26.8817	0.00091	1e-06	1.5e-05	0.002748	1.9e-05	2.6e-05	0.002347	2.9e-05	0.001874	0.001272	0.00054	0.000374	0.001318	7.2e-05	0.00014	0.000234	0.003184
Flavobacterium album	Bacteria	38.7097	0.000909	0.000374	5.5e-05	0.001549	0.000131	0.000298	0.003948	0.000564	0.000186	0.00063	0.001195	0.001252	0.001193	0.000283	0.00018	0.000702	0.001789
Actinomyces radicidentis	Bacteria	38.7097	0.000909	0.000841	0.001253	0.000198	4e-05	0.000577	0.00041	0.001503	0.002555	0.001264	0.000546	0.000501	0.001855	0.00093	0.001022	0.000246	0.000876
Ligilactobacillus ruminis	Bacteria	33.3333	0.000908	0.001952	0.000151	0.001088	0.003057	8.7e-05	5.3e-05	0.000182	0.000509	0.000194	0.001638	0.002569	0.000234	0.000176	0.000185	0.001507	0.000791
Mycobacteroides abscessus	Bacteria	35.4839	0.000905	0.000796	0.0004	0.000241	0.001594	0.000431	0.0008	0.002839	0.000214	0.00078	0.001032	0.000194	0.001263	0.000285	0.000862	0.002064	0.000638
Parafannyhessea umbonata	Bacteria	39.7849	0.000905	0.000508	0.000569	0.000828	0.001105	0.000425	0.00051	0.000875	0.00236	0.000949	0.00086	0.001466	0.00086	0.001262	0.0005	0.001009	0.00041
Aquisphaera giovannonii	Bacteria	26.8817	0.000903	0.000149	0.000118	0.000219	2.6e-05	3.3e-05	7.8e-05	0.00691	6.1e-05	0.001649	0.00014	3.1e-05	6.3e-05	0.000319	8.6e-05	0.004747	4.5e-05
Aminipila luticellarii	Bacteria	34.4086	0.000902	0.001258	0.000725	0.001112	0.000176	0.000333	0.001028	0.000431	0.002087	0.001057	0.000744	0.00084	0.001589	0.000861	0.00164	3.7e-05	0.000437
Bacteroides zoogleoformans	Bacteria	37.6344	0.000897	0.000741	0.000279	0.002331	0.000407	0.001772	0.000567	0.000692	0.000264	0.000898	0.000895	0.000901	0.001182	7e-05	0.000388	0.001197	0.001538
Botrimarina mediterranea	Bacteria	36.5591	0.000891	0.000975	7.7e-05	0.000551	2e-05	0.000108	0.004322	0.000314	0.000581	0.00027	0.001526	0.000322	0.002921	0.000217	0.00073	0.00035	0.000689
Cobetia sp. cqz5-12	Bacteria	41.9355	0.000887	0.002238	0.000457	0.001548	0.000703	0.000511	0.000709	0.000535	0.000296	0.000802	0.000974	0.001041	0.000703	0.001204	0.000799	0.001463	0.000162
Fictibacillus arsenicus	Bacteria	43.0108	0.000884	0.000109	0.000235	0.000649	0.000258	0.002021	0.001048	0.001381	0.001306	0.000625	0.001149	0.000107	0.000656	0.001219	0.001783	0.00084	0.000694
Plantactinospora sp. BB1	Bacteria	53.7634	0.000882	0.000425	0.000179	0.001741	0.000613	0.000759	0.001684	0.000273	0.001219	0.000848	0.000918	0.00041	0.001225	0.000476	0.000519	0.001143	0.001442
Ureibacillus thermosphaericus	Bacteria	48.3871	0.000882	0.001364	0.000868	0.000906	0.00059	0.000982	0.001059	0.000871	0.000416	0.000631	0.001139	0.00042	0.000556	0.000631	0.00097	0.001797	0.000859
Actinomyces sp. oral taxon 897	Bacteria	29.0323	0.000882	0.000517	0.000338	0.002797	2.5e-05	0.000268	0.000187	0.001477	0.001403	0.001541	0.000209	0.000365	0.00052	0.00026	0.000513	0.000856	0.002667
Actinomyces procaprae	Bacteria	31.1828	0.000879	0.000365	0.000111	7.4e-05	2e-05	0.000265	0.004731	0.000592	0.000722	0.000419	0.001349	0.000291	0.000414	8.4e-05	0.000358	0.000377	0.003614
Actinopolymorpha singaporensis	Bacteria	33.3333	0.000879	0.000117	8.7e-05	0.001218	0.001275	0.000121	0.002819	0.001248	4.3e-05	0.000833	0.000925	0.001069	0.000736	0.000519	0.000118	0.001532	0.001265
Bacillus anthracis	Bacteria	24.7312	0.000879	0.000145	0.004784	9e-05	0.000967	0.000222	0.000153	0.000151	0.001106	0.001282	0.000466	0.000902	0.000265	0.000394	0.000331	0.000148	0.003173
Lichenicola cladoniae	Bacteria	51.6129	0.000877	0.000289	0.000359	0.00233	0.001138	9e-05	0.00135	0.000917	0.000459	0.001122	0.000627	0.000465	0.000753	0.001916	0.000341	0.001161	0.000728
Phascolarctobacterium sp. Marseille-Q4147	Bacteria	36.5591	0.000877	0.000364	0.000288	0.000331	0.000153	0.000184	8.1e-05	0.004813	0.001031	0.001431	0.000311	0.0002	0.00088	0.000302	0.000461	0.003039	0.000263
Clostridium beijerinckii	Bacteria	47.3118	0.000874	0.00093	0.000873	0.000443	0.001162	0.000268	0.00083	0.001281	0.001241	0.00097	0.000777	0.001189	0.000792	0.001058	0.000931	0.001052	0.000265
Ferribacterium limneticum	Bacteria	27.957	0.000872	2.6e-05	9.3e-05	0.000285	2.8e-05	2.1e-05	9.4e-05	0.006676	0.000104	0.00166	6.6e-05	9.3e-05	8.4e-05	4.6e-05	0.00028	0.004398	0.000177
Spirosoma sp. RHs26	Bacteria	47.3118	0.000871	0.000672	0.000582	0.002037	0.001023	0.000643	0.000627	0.000937	0.000401	0.000813	0.000929	0.000377	0.00087	0.001201	0.000657	0.001132	0.000997
Haematobacter massiliensis	Bacteria	36.5591	0.000871	0.001614	0.000218	0.001696	0.000572	0.000162	0.001196	0.001313	0.000121	0.00078	0.000964	0.00104	0.000375	0.00042	0.001323	0.000428	0.001592
Helcococcus kunzii	Bacteria	32.2581	0.00087	0.002235	0.000234	0.001133	0.000184	0.000545	0.001533	0.000168	0.000762	0.00124	0.000492	0.001249	0.001425	0.000344	0.001802	0	0.000357
Mycobacterium koreense	Bacteria	46.2366	0.000865	0.000776	0.000842	0.00132	0.000513	0.001315	0.000913	0.000971	0.000278	0.000795	0.000937	0.000188	0.001285	0.001323	0.001633	0.000387	0.000392
Bradyrhizobium lablabi	Bacteria	15.0538	0.000862	2.6e-05	0.000379	8.4e-05	7e-06	1.6e-05	0.000206	0.006498	7e-05	0.001559	0.00015	0.00032	0.000109	7.1e-05	0.000101	0.004439	0
Citrobacter tructae	Bacteria	34.4086	0.000859	0.0007	0.000951	0.001111	0.000552	0.000281	0.001994	0.000892	0.000405	0.000679	0.001042	0.001242	0.000144	0.001443	0.000802	0.0013	0.000317
Acutalibacter muris	Bacteria	41.9355	0.000858	0.000553	0.000872	0.001352	0.000328	0.000326	0.00059	0.001305	0.001579	0.001065	0.000647	0.001338	0.000826	0.000709	0.001032	0.000926	0.000329
Granulicatella elegans	Bacteria	40.8602	0.000857	0.001476	0.000157	0.00041	0.000442	0.000275	0.001826	0.001633	0.000588	0.001185	0.000522	0.000742	0.00086	0.000225	0.001779	0.000726	0.000725
Geobacillus sp. 46C-IIa	Bacteria	18.2796	0.000854	2e-06	0.000692	0.000479	7e-06	0.000321	0.002702	0.001793	0.00089	0.000822	0.000888	0.001957	0.000703	0.000137	0.000651	0.001254	0.000403
Saccharopolyspora erythraea	Bacteria	52.6882	0.00085	0.000704	0.000401	0.001016	0.000904	0.000352	0.001778	0.001122	0.000474	0.000732	0.000971	0.000109	0.000784	0.000919	0.000324	0.000856	0.002071
Halomonas meridiana	Bacteria	24.7312	0.000848	1.7e-05	0.002143	0.000108	1.1e-05	0.004274	0.000272	4.4e-05	6.4e-05	0.001576	0.000104	0.000214	9.6e-05	0.0037	0.000126	0.001254	1.4e-05
Leptolyngbya sp. 7M	Bacteria	52.6882	0.000848	0.000669	0.000664	0.001616	0.000641	0.000357	0.002336	0.000205	0.000209	0.000742	0.000956	0.000582	0.000521	0.000918	0.000627	0.000724	0.001706
Aminipila terrae	Bacteria	33.3333	0.000845	0.0013	0.000711	0.000272	0.000297	0.000511	0.001127	0.000395	0.002087	0.001015	0.000672	0.001017	0.001177	0.001037	0.001193	3.5e-05	0.000646
Prevotella sp. oral taxon 475	Bacteria	25.8065	0.000844	1.4e-05	0.001917	0.002865	7.4e-05	0.001513	7e-06	4.3e-05	0.000433	0.000512	0.001184	0.001362	7.2e-05	1.7e-05	0.000213	0.001131	0.0022
Streptococcus periodonticum	Bacteria	24.7312	0.000842	0.000121	0.001874	0.000149	0.000317	0.000125	0.000731	0.000575	0.002996	0.001022	0.000658	0.000359	0.001715	0.001479	0.00047	0	0.00108
Rhodoplanes sp. Z2-YC6860	Bacteria	24.7312	0.000838	3e-06	0.000249	8.6e-05	4.9e-05	8e-06	7.9e-05	0.006532	7.6e-05	0.001574	8.6e-05	7.3e-05	4.3e-05	2.5e-05	0.000197	0.004495	4.6e-05
Actinomyces faecalis	Bacteria	33.3333	0.000837	0.000476	0.000203	0.00068	1.2e-05	0.000403	0.0032	0.000684	0.000922	0.000437	0.001246	0.000847	0.000817	0.000202	0.00044	0.000104	0.002535
Pseudomonas orientalis	Bacteria	41.9355	0.000835	0.000122	0.000135	0.001039	0.002438	0.000133	0.002034	8.5e-05	0.000517	0.000414	0.001266	4.5e-05	0.000213	0.000198	0.00163	0.000985	0.001813
Lactobacillus jensenii	Bacteria	49.4624	0.000834	0.000815	0.00073	0.000819	0.00034	0.000556	0.001955	0.001132	0.000337	0.000601	0.001073	0.000636	0.000592	0.001086	0.001685	0.000357	0.00067
Elizabethkingia anophelis	Bacteria	50.5376	0.00083	0.002279	0.000419	0.000799	0.000797	0.000572	0.000519	0.000786	0.000394	0.000513	0.001153	0.000437	0.000715	0.001579	0.000707	0.000587	0.001023
Shewanella psychrophila	Bacteria	39.7849	0.000829	0.000519	0.000164	0.001313	9.8e-05	0.001722	0.001657	0.000181	0.000813	0.000735	0.000925	0.000221	0.000604	0.000852	0.00052	0.00245	0.000291
Prevotella buccalis	Bacteria	29.0323	0.000829	1.3e-05	0.000272	0.002754	0.000959	0.001243	0.000327	0.000691	0.000266	0.000622	0.00104	0.000482	0.000653	1.1e-05	0.000333	0.001252	0.002117
Altererythrobacter sp. TH136	Bacteria	41.9355	0.000826	0.002006	0.000536	0.001079	0.00062	0.00048	0.000106	0.00086	0.000879	0.000549	0.00111	0.000323	0.000603	0.000633	0.000874	0.001656	0.000814
Exiguobacterium alkaliphilum	Bacteria	34.4086	0.000824	0.000889	0.000335	0.000653	0.000121	0.000873	0.002614	8e-06	0.000953	0.000524	0.001132	2.2e-05	0.000124	0.000648	0.00239	0.001036	0.000654
Glaesserella parasuis	Bacteria	32.2581	0.000824	0.000204	0.000135	0.000311	2.5e-05	0.004652	0.001016	1.2e-05	5.1e-05	0.001507	0.000126	0.000905	2.3e-05	0.000133	0.003309	0.000249	0.000243
Thermus thermophilus	Bacteria	33.3333	0.000823	2.1e-05	0.000357	0.001201	0.00026	0.00038	0.001177	0.002268	0.000967	0.000938	0.000707	0.000814	0.000639	0.000534	0.000369	0.002015	0.000534
Propionibacterium freudenreichii	Bacteria	31.1828	0.000823	0.000422	0.001793	4e-05	1.2e-05	0.00022	0.000678	0.00077	0.002802	0.001274	0.000361	0.000788	0.00223	0.00019	0.000286	0.001097	0.000264
Sphingomonas sp. FARSPH	Bacteria	24.7312	0.000821	0.000509	0.000442	0.000183	4.2e-05	0.000161	0.001821	0.002232	0.001233	0.000932	0.000708	0.001421	0.00057	6.3e-05	0.001347	0.001269	0.0002
Caballeronia zhejiangensis	Bacteria	15.0538	0.00082	1.7e-05	9.6e-05	0	2e-06	1.7e-05	0	0.006718	8.3e-05	0.001565	5.9e-05	6e-06	5.2e-05	5.7e-05	7e-05	0.004557	3.4e-05
Bradyrhizobium guangzhouense	Bacteria	30.1075	0.00082	0.001068	5.1e-05	0.000627	0.0004	0.000215	0.000354	0.003691	0.000262	0.000805	0.000834	7.3e-05	0.000391	0.000952	0.000392	0.00243	0.00065
Glaciimonas sp. PAMC28666	Bacteria	38.7097	0.000817	0.000846	0.000356	0.001473	0.000595	0.000274	7e-05	0.002819	0.00019	0.000604	0.001034	0.000561	0.000181	0.001848	0.000558	0.001157	0.000708
Citrobacter sp. RHB25-C09	Bacteria	26.8817	0.000815	5e-05	0.00166	0.000555	0.000881	0.000414	0.002684	8.8e-05	0.000268	0.000217	0.001426	0.001476	0.000379	0.001461	0.000215	0.001222	0.000259
Chelatococcus sp. CO-6	Bacteria	44.086	0.000814	0.000932	0.000705	0.000552	0.000782	0.000194	0.001589	0.001728	9.1e-05	0.000669	0.000962	0.000288	0.000595	0.000661	0.000392	0.001508	0.00139
Enterococcus sp. DA9	Bacteria	12.9032	0.000812	0	0.000403	0	0.000944	0	0.001416	0.000727	0.002929	0.001114	0.000503	0.000782	0.000753	0.001686	0.001062	0.000425	0.00027
Natronoglycomyces albus	Bacteria	25.8065	0.000809	4.6e-05	1.8e-05	0.000172	4e-06	0.004577	0.001305	5.3e-05	0.000107	0.001206	0.000405	1.6e-05	0.001034	3.4e-05	0.003494	0.000119	1.3e-05
Acidovorax carolinensis	Bacteria	35.4839	0.000809	0.000122	0.004917	0.000312	3.2e-05	0.000839	0.000474	0.000163	0.000246	0.001119	0.000493	0.00323	0.000131	0.000126	0.000338	0.000551	0.000545
Streptomyces sp. 135	Bacteria	41.9355	0.000807	0.001812	3.2e-05	0.000821	0.000378	0.000123	0.001885	0.001241	7.2e-05	0.000884	0.000729	0.001385	0.000936	0.000664	0.000453	0.000503	0.000918
Dyadobacter fermentans	Bacteria	53.7634	0.000807	0.001201	0.001141	0.001227	0.000518	0.00068	0.000808	0.000564	0.000351	0.000629	0.000989	0.000714	0.001199	0.000946	0.000671	0.000716	0.000607
Bacteroides helcogenes	Bacteria	44.086	0.000802	0.000514	0.000469	0.002241	0.000262	0.001108	0.000727	0.000735	0.000298	0.000763	0.000841	0.001015	0.00086	0.000269	0.000582	0.000961	0.001073
Thioalkalivibrio sulfidiphilus	Bacteria	30.1075	0.000801	9e-06	0.002573	0.000942	0.000502	0.000242	0.000268	0.002017	0.000254	0.000784	0.000819	0.001793	0.000712	0.001619	0.000159	0.000546	0.000142
Dialister hominis	Bacteria	13.9785	0.000799	0.000106	0.000847	1.1e-05	8.4e-05	1e-05	0	0.001036	0.004327	0.000573	0.001031	7.4e-05	0.00149	0.000108	0.00253	0	0.000461
Actinomadura sp. WMMA1423	Bacteria	39.7849	0.000799	0.002326	0.000126	0.001768	2.5e-05	0.000128	0.000508	0.001273	0.000166	0.000383	0.001225	0.001068	0.000244	0.000171	0.000409	0.002421	0.00042
Cloacibacterium caeni	Bacteria	29.0323	0.000795	1.7e-05	0.004161	0.000898	8e-06	0.000336	0.000525	0.000195	0.00073	0.001111	0.000472	0.002481	0.000635	0.000493	0.000558	0.00049	0.000179
Peptacetobacter hiranonis	Bacteria	45.1613	0.000795	0.001055	0.000411	0.000605	0.000557	0.000564	0.00132	0.000342	0.001401	0.000914	0.000672	0.00128	0.000716	0.00058	0.001138	0.000225	0.00083
Porphyromonas gingivalis	Bacteria	46.2366	0.000793	0.00031	0.000243	0.001416	0.000928	0.000974	0.000581	0.001669	0.000205	0.001201	0.000376	0.00087	0.000672	0.000341	0.001539	0.000634	0.000651
Mannheimia haemolytica	Bacteria	30.1075	0.000791	0.000646	0.000232	0.000456	1.1e-05	0.001495	0.003042	0.000241	6.9e-05	9.4e-05	0.001504	0.000154	0.000507	0.000376	0.001153	0.000873	0.001593
Mycobacterium intracellulare	Bacteria	31.1828	0.00079	5.9e-05	0.001103	0.00041	3.5e-05	0.000303	0.000932	0.001892	0.001732	0.001062	0.000512	0.000484	0.000429	0.000571	0.000986	0.001743	0.000482
Isosphaera pallida	Bacteria	40.8602	0.000788	0.001289	0.000452	0.000921	9.1e-05	0.000136	0.000137	0.003246	0.000177	0.000671	0.000907	0.000126	0.000299	0.002576	0.000348	0.000986	0.000572
Levilactobacillus brevis	Bacteria	36.5591	0.000784	0.000367	0.001366	0.000182	0.000247	0.000495	0.000754	0.001041	0.001937	0.001038	0.000524	0.000341	0.001213	0.000915	0.000629	0.000299	0.001295
Corynebacterium glaucum	Bacteria	43.0108	0.000781	0.00246	0.000403	0.000659	0.000414	0.00053	0.0005	0.000742	0.000476	0.000787	0.000776	0.000529	0.000501	0.001501	0.000869	0.000423	0.00094
Veillonella dispar	Bacteria	32.2581	0.000779	0.000703	0.000215	0.000607	8.7e-05	0.000315	0.001128	0.000767	0.002317	0.001108	0.000443	0.000507	0.000779	0.000173	0.002395	0.000206	0.000522
Singulisphaera acidiphila	Bacteria	21.5054	0.000779	9e-06	4.1e-05	2.2e-05	5e-06	1.1e-05	0.000126	0.006327	2.7e-05	0.001491	5e-05	2.8e-05	4.6e-05	7.4e-05	2.3e-05	0.004329	3.5e-05
Paenibacillus sp. B01	Bacteria	35.4839	0.000778	0.000299	0.000378	0.00084	9.5e-05	0.000322	0.001949	0.000258	0.001974	0.000745	0.000812	0.001523	0.000619	0.000731	0.000902	0.000253	0.000682
Diaphorobacter sp. HDW4A	Bacteria	20.4301	0.000778	0.000817	0.005775	0	3e-06	2.4e-05	9.8e-05	8.1e-05	0.000198	0.001265	0.000279	7.7e-05	0.000145	7.2e-05	0.003627	1.9e-05	0.000595
Gemmatirosa kalamazoonesis	Bacteria	35.4839	0.000778	0.000543	0.000495	0.001066	0.001134	3.7e-05	0.000378	0.002634	4.2e-05	0.001123	0.000425	0.000376	0.00074	0.001285	0.000138	0.002128	3.7e-05
Intestinibaculum porci	Bacteria	36.5591	0.000777	0.000275	0.000251	0.000758	0.002995	0.000118	0.000708	0.00016	0.00081	0.000468	0.001093	0.000836	0.002234	0.00032	0.000766	0.00013	0.000321
Veillonella rodentium	Bacteria	31.1828	0.000773	3.2e-05	6.2e-05	5.4e-05	0.002497	8.4e-05	0.002165	0.000599	0.000555	0.000947	0.000594	4.8e-05	0.000152	6.5e-05	0.000351	0.002333	0.001554
Streptococcus sp. FDAARGOS_522	Bacteria	15.0538	0.000771	0.000471	0.000222	0.000156	0.003599	5.2e-05	0	0.000677	0.000895	0.000545	0.001003	0.00293	0.000713	0.000752	0.000206	0	0.00016
Campylobacter coli	Bacteria	35.4839	0.00077	0.000517	9.5e-05	0.001021	0.000245	0.00048	9.1e-05	0.000254	0.003303	0.000412	0.001136	0.000301	0.000709	0.000662	0.002027	0.000386	0.000495
Mycobacterium marinum	Bacteria	25.8065	0.00077	0.000169	0.000327	0.00107	0.000105	0.000342	0.000438	0.00283	0.000975	0.00087	0.000667	0.0004	0.000658	0.001052	0.000261	0.001802	0.000457
Bulleidia sp. zg-1006	Bacteria	39.7849	0.000769	0.001048	0.000273	0.000977	0.000875	0.000575	0.000905	0.000339	0.00104	0.000775	0.000762	0.000981	0.001438	0.000287	0.001271	9.9e-05	0.00049
Scytonema sp. HK-05	Bacteria	13.9785	0.000768	6e-06	0.000186	1.4e-05	0.001375	2e-06	0	0.004456	0.000315	0.001399	0.000123	1.9e-05	6e-06	5e-06	2e-06	0.004317	0.000116
Leclercia adecarboxylata	Bacteria	33.3333	0.000762	7.9e-05	0.002091	0.000426	0.001019	0.000393	0.001514	0.000149	0.000598	0.000231	0.001306	0.00032	0.000408	0.002077	0.000198	0.001452	0.000256
Rheinheimera mangrovi	Bacteria	36.5591	0.000762	0.000401	0.000288	0.000444	0.000188	0.000473	0.001655	0.001356	0.001259	0.000579	0.000948	0.001155	0.000618	0.000715	0.000505	0.001257	0.000339
Ruminococcus champanellensis	Bacteria	31.1828	0.000758	0.001392	0.000457	0.000113	0.000106	6.8e-05	0.000323	0.000172	0.003337	0.00058	0.00094	0.000185	0.000921	0.001514	0.001451	8.7e-05	0.00045
Catenulispora acidiphila	Bacteria	45.1613	0.000756	0.002223	0.000313	0.000251	0.000826	4.6e-05	9.5e-05	0.002075	0.00026	0.000663	0.000852	0.001161	0.00047	0.000419	0.000744	0.000957	0.000772
Halomonas sp. JS92-SW72	Bacteria	25.8065	0.000756	0.002413	0.001995	0.000714	0.000108	1.3e-05	0.000112	0.000722	0.000176	0.000917	0.000593	0.000195	0.000242	0.000713	0.000225	0.001993	0.00113
Prevotella sp. E13-17	Bacteria	27.957	0.000756	1.1e-05	7.4e-05	0.003014	5.6e-05	0.001999	0.000102	0.000495	0.000164	0.000704	0.00081	0.000161	3.1e-05	1.5e-05	0.000168	0.001786	0.002245
Micrococcus luteus	Bacteria	26.8817	0.000754	0.000182	0.000448	0.000208	0.000104	3.1e-05	4.1e-05	0.003974	0.001263	0.001138	0.000363	0.000208	0.000512	0.000697	0.00039	0.002531	0.000147
Neisseria mucosa	Bacteria	23.6559	0.000754	0.000969	0.000121	0.003699	4e-06	6.7e-05	0.00024	0.000164	0.000616	0.000592	0.00092	0.001643	0.000267	5.9e-05	0.000111	0.000271	0.002143
Candidatus Uabimicrobium amorphum	Bacteria	35.4839	0.000754	0.000172	0.000103	0.002301	3.3e-05	8.7e-05	0.001162	0.001854	0.000303	0.000672	0.000838	2.9e-05	9.8e-05	0.003438	0.000114	0.00011	0.001026
Spirosoma taeanense	Bacteria	35.4839	0.000753	0.000104	0.004422	0.000118	0.000289	0.000275	0.000923	0.000278	0.000185	0.001043	0.000456	0.002991	0.000871	4.2e-05	0.000253	0.00013	0.00028
Campylobacter gracilis	Bacteria	24.7312	0.000753	0.001209	0.000276	0.00013	1.6e-05	0.000919	0.002308	0.001032	7.5e-05	0.000329	0.001186	5e-05	0.000266	4.6e-05	0.002299	0.00082	0.000903
Providencia alcalifaciens	Bacteria	41.9355	0.000752	3.2e-05	0.000239	0.002587	6.4e-05	0.001735	0.000196	0.000775	0.000307	0.000487	0.001023	0.000133	0.000184	0.000912	0.002951	0.000108	0.000208
Acinetobacter schindleri	Bacteria	45.1613	0.000752	0.00098	0.000145	0.000384	0.000757	0.000262	0.0007	0.002143	0.000659	0.000404	0.001108	0.000285	0.000147	0.002361	0.000808	0.000892	0.000191
Mycolicibacterium phocaicum	Bacteria	36.5591	0.000744	0.001728	0.001016	0.000495	0.000187	0.000459	0.000311	0.00126	0.00058	0.000332	0.001164	0.000175	0.001723	0.000308	0.000814	0.000949	0.000402
Pseudomonas koreensis	Bacteria	26.8817	0.000743	0.00014	8e-06	0.000854	0.004196	1.9e-05	0.0003	5.1e-05	0.000195	0.00027	0.001225	0.000195	8.9e-05	0.000172	8.1e-05	0.00085	0.002963
Blattabacterium cuenoti	Bacteria	56.9892	0.000742	0.000877	0.000345	0.000541	0.000904	0.000415	0.001308	0.00098	0.000523	0.000855	0.000627	0.001212	0.000764	0.000608	0.000549	0.000912	0.000422
Clostridium pasteurianum	Bacteria	51.6129	0.000742	0.001337	0.000521	0.000612	0.000437	0.000415	0.000787	0.000803	0.000995	0.000776	0.000708	0.001197	0.000681	0.000915	0.000614	0.000563	0.000534
Staphylococcus lutrae	Bacteria	15.0538	0.000739	1.5e-05	0.000167	0	8e-06	0.005395	2e-05	3e-06	0.000144	0.001427	3.5e-05	1.5e-05	3.5e-05	1.6e-05	0.004063	0	0.000167
Prevotella fusca	Bacteria	29.0323	0.000738	0.000134	0.000432	0.001593	7.4e-05	0.000893	2.7e-05	0.002785	8.2e-05	0.000285	0.0012	7.1e-05	0.000155	0.002219	6.3e-05	0.000668	0.001392
Staphylococcus argenteus	Bacteria	15.0538	0.000737	1.3e-05	0.003619	0	3e-05	2e-06	0.000289	1.2e-05	0.002348	0.001006	0.000461	1.6e-05	0.000692	0.000763	0.000254	0	0.002653
Allocoleopsis franciscana	Bacteria	36.5591	0.000734	0.000473	0.000118	0.002108	0.000819	0.000326	0.001118	0.000442	0.000343	0.00086	0.000605	0.000702	0.000941	0.000641	0.000384	0.000529	0.001195
Corynebacterium jeikeium	Bacteria	27.957	0.000724	0.001159	0.000394	0.000317	0.000286	5.1e-05	0.001123	0.001909	0.000598	0.001053	0.000388	0.000832	0.002482	0.000108	0.000793	0	6.1e-05
Anoxybacillus sediminis	Bacteria	37.6344	0.000719	0.00032	0.000233	0.000207	4.9e-05	0.000119	0.001317	0.001045	0.002409	0.000932	0.000501	0.000937	0.000505	0.000121	0.001496	0.000661	0.000533
Parasphingorhabdus halotolerans	Bacteria	37.6344	0.000719	0.001941	4e-05	0.000845	0.000399	0.000301	0.001551	0.000206	0.000313	0.000839	0.000597	0.000694	0.000626	0.001349	0.000541	0.000928	0.000253
Nostoc edaphicum	Bacteria	37.6344	0.000715	0.000804	0.00037	0.000173	0.000739	0.000246	0.000953	0.00209	0.000401	0.000871	0.000555	0.002093	0.000793	0.000395	0.000193	0.000453	0.000409
Agromyces flavus	Bacteria	19.3548	0.000715	2.1e-05	0.00622	0	7e-06	5.4e-05	0.000194	3.9e-05	4.6e-05	0.001385	3e-05	0.004311	4.1e-05	2.6e-05	2.5e-05	0	2.5e-05
Kitasatospora sp. NA04385	Bacteria	46.2366	0.000715	0.000461	0.000949	0.000841	0.001259	0.000257	0.00041	0.001285	0.000344	0.000731	0.000698	0.000303	0.000523	0.000781	0.000446	0.001376	0.000842
Bacillus pseudomycoides	Bacteria	48.3871	0.000712	0.001498	0.000142	0.000785	0.000227	0.00042	0.001675	0.000112	0.000688	0.000442	0.000987	0.00049	0.000713	0.000393	0.000294	0.000585	0.00174
Actinomyces howellii	Bacteria	33.3333	0.000709	0.000608	0.000286	0.000195	9e-06	0.001143	0.000297	0.001734	0.001415	0.00107	0.00034	0.0005	0.000814	0.00024	0.000901	0.000974	0.000754
Clostridium novyi	Bacteria	40.8602	0.000709	0.000714	0.0007	0.000981	0.000378	0.000496	0.00087	0.000141	0.001341	0.000762	0.000654	0.000555	0.000643	0.000771	0.000876	0.000904	0.000504
Corynebacterium macginleyi	Bacteria	24.7312	0.000709	0.00121	0.000182	0.000372	2e-06	2.1e-05	0.000106	0.003439	0.000474	0.000992	0.000419	0.000105	0.002773	0.000204	7.1e-05	0.000841	0.000158
Streptomyces olivoreticuli	Bacteria	25.8065	0.000707	9.7e-05	0.000108	1.9e-05	3.5e-05	0.004184	3.7e-05	0.001023	8.1e-05	0.001347	5.4e-05	6.3e-05	6e-05	4.9e-05	0.003203	0.00073	1.7e-05
Kytococcus sedentarius	Bacteria	30.1075	0.000707	0.000241	7.4e-05	4.2e-05	1.3e-05	6.4e-05	6e-05	0.004889	0.000517	0.001288	0.000114	7.9e-05	0.000382	0.000249	0.000179	0.003209	4.8e-05
Phenylobacterium zucineum	Bacteria	33.3333	0.000703	0.000267	3.4e-05	0.002194	0.002326	5.1e-05	2.7e-05	0.000489	0.000107	0.001328	6.5e-05	3e-05	0.000141	0.002076	0.000723	0.001312	6.7e-05
Cupriavidus gilardii	Bacteria	13.9785	0.000702	4e-06	0.000637	0.000517	0	8.3e-05	0.001021	0.002115	0.001346	0.000959	0.000439	0.000805	0.000577	6.7e-05	0.001047	0.001364	0.000278
Furfurilactobacillus rossiae	Bacteria	30.1075	0.000701	0.000981	0.000902	0.000295	6.2e-05	0.001072	0.000191	2.4e-05	0.002061	0.000961	0.000436	0.00058	0.001023	0.000305	0.00083	0.000748	0.000665
Selenomonas sputigena	Bacteria	38.7097	0.000701	0.002135	0.000218	0.000145	0.000307	0.000213	0.001163	0.000817	0.000538	0.000343	0.001066	0.000279	0.001139	0.000153	0.00029	0.000571	0.001679
Pseudomonas synxantha	Bacteria	32.2581	0.000698	2.4e-05	6.1e-05	0.001149	0.003075	1e-05	0.00092	1.9e-05	0.000167	0.000318	0.001087	0.000122	0.000679	0.000106	8.6e-05	0.000596	0.002491
Dictyoglomus thermophilum	Bacteria	46.2366	0.000698	0.000363	7e-05	0.001094	0.000582	0.000725	0.001453	0.000147	0.000999	0.000278	0.001127	0.000202	0.001512	0.000797	0.000257	0.001175	0.000228
Corynebacterium minutissimum	Bacteria	20.4301	0.000694	0.000186	0.000148	8.9e-05	3e-06	4e-06	3.5e-05	0.004939	0.00041	0.001305	7e-05	3.4e-05	0.00351	0.00013	0.000111	0.000107	0.00016
Paenibacillus sp. HWE-109	Bacteria	41.9355	0.000693	0.000235	0.000413	0.000383	0.000227	0.000187	0.001558	0.001368	0.001185	0.000718	0.000668	0.001118	0.000704	0.000209	0.000833	0.000909	0.000354
Faecalibaculum rodentium	Bacteria	38.7097	0.000693	8.3e-05	0.00019	0.000807	0.001394	0.000135	0.000233	0.001574	0.001116	0.000427	0.000964	0.001239	0.000586	0.000583	0.000642	0.000757	0.000369
Tannerella serpentiformis	Bacteria	37.6344	0.000692	0.000134	0.000313	0.001941	0.000149	0.000524	0.000264	0.001851	0.000396	0.000665	0.00072	0.000913	0.000218	0.00017	0.000594	0.001163	0.001045
Prevotella enoeca	Bacteria	26.8817	0.000684	8e-06	0.000299	0.002922	0.000199	0.001604	4e-06	0.000144	0.000187	0.00055	0.000822	0.00022	0.000442	2.6e-05	0.000105	0.001053	0.002149
Enterococcus hirae	Bacteria	33.3333	0.000682	4.1e-05	0.000302	0.000516	0.00176	6.9e-05	0.000456	0.000602	0.00164	0.000611	0.000755	0.00172	0.000634	0.000881	6.5e-05	0.000311	0.000572
Sutterella megalosphaeroides	Bacteria	30.1075	0.000682	2.9e-05	0.000308	0.002211	5.4e-05	0.000395	0.001051	0.001113	0.000266	0.000971	0.000386	0.001648	0.000248	0.000516	0.000315	0.000854	0.000551
Actinomyces sp. HMT897	Bacteria	34.4086	0.000678	0.000689	0.000426	0.000267	3.1e-05	0.000577	0.000164	0.001514	0.001781	0.000842	0.00051	0.000365	0.001117	0.000341	0.001092	0.000205	0.000885
Sporosarcina sp. PTS2304	Bacteria	40.8602	0.000677	0.000569	0.000254	0.00088	0.000411	0.000451	0.001826	2.5e-05	0.000875	0.000637	0.000718	0.000365	0.000682	0.000308	0.000663	0.001407	0.000572
Vibrio scophthalmi	Bacteria	45.1613	0.000675	0.001741	0.000375	0.000911	0.000306	0.000451	0.000617	0.000389	0.000535	0.000519	0.000835	0.000312	0.000303	0.001132	0.000583	0.000729	0.001025
Brevibacillus formosus	Bacteria	38.7097	0.000672	0.000532	0.000296	0.00027	0.000217	0.001027	0.000373	0.002175	0.000549	0.000754	0.000589	0.000178	0.000315	0.000922	0.00058	0.000527	0.001512
Cupriavidus metallidurans	Bacteria	41.9355	0.00067	0.000118	0.0005	0.00109	0.000142	8.2e-05	0.000418	0.00278	0.00038	0.000948	0.000387	0.000379	0.000568	0.00016	0.00044	0.001695	0.000697
Streptomyces mirabilis	Bacteria	15.0538	0.000669	0.000464	0	0.001211	1.8e-05	0	0.000467	0.003023	0.00025	0.000884	0.000448	3.2e-05	0.00013	0	0.001233	0.002409	8.5e-05
Treponema sp. OMZ 838	Bacteria	26.8817	0.000668	3.5e-05	8e-06	7.2e-05	0.000542	0.00054	5.8e-05	0.004031	0.000231	7e-05	0.00128	5.4e-05	0.000237	3.7e-05	0.002819	0.000398	0.000347
Herbinix luporum	Bacteria	37.6344	0.000668	0.000667	0.00055	0.000677	0.00033	0.0002	0.000579	0.000356	0.001935	0.000778	0.000555	0.000649	0.000723	0.001018	0.001184	0.000143	0.000332
Corynebacterium kroppenstedtii	Bacteria	44.086	0.000665	0.000208	0.003548	0.000418	0.000243	9.7e-05	0.000222	0.000254	0.00078	0.000942	0.000383	0.002414	0.000372	0.000254	0.000156	0.000719	0.000135
Flammeovirga sp. MY04	Bacteria	39.7849	0.000665	0.001443	0.000491	0.000392	0.001463	0.000439	0.00049	0.00024	0.0003	0.000458	0.000877	0.000745	0.000756	0.00071	0.000658	0.000723	0.00041
Modestobacter marinus	Bacteria	26.8817	0.000665	1.9e-05	1.7e-05	6.6e-05	2.8e-05	9.4e-05	4.9e-05	0.005275	4.5e-05	0.00116	0.000159	9.9e-05	0.00014	0.000309	1.8e-05	0.003318	2.4e-05
Spirosoma aureum	Bacteria	46.2366	0.000664	0.001554	7.7e-05	0.001734	0.000753	0.000323	0.000238	0.000216	0.00028	0.000682	0.000645	0.000657	0.000733	0.000968	0.000661	0.000706	0.000295
Halomonas sp. THAF5a	Bacteria	29.0323	0.000662	0.000353	0.002126	1.8e-05	2.6e-05	2.5e-05	0.00263	0.000263	6.6e-05	0.001219	9.3e-05	0.002013	4.1e-05	0.000451	8.1e-05	0.001405	3.8e-05
Pseudoalteromonas shioyasakiensis	Bacteria	33.3333	0.000661	0.000711	6.2e-05	0.000612	0.000392	0.000375	0.001564	4e-06	0.001415	0.000655	0.000668	0.001227	0.000889	7.4e-05	0.000192	0.00127	0.000277
Acetobacterium woodii	Bacteria	45.1613	0.000659	0.000911	0.000228	0.001089	0.000789	4.9e-05	0.000261	0.000277	0.001563	0.000595	0.000724	0.000514	0.000771	0.000968	0.000392	0.000995	0.000344
Metabacillus sp. cB07	Bacteria	52.6882	0.000656	0.000629	0.000462	0.000701	0.000691	0.001197	0.000409	0.000641	0.000481	0.000447	0.000869	0.000151	0.000892	0.000992	0.000632	0.000913	0.000364
Streptococcus ratti	Bacteria	32.2581	0.000656	0.001112	0.000242	0.00104	0.001923	8.9e-05	6.2e-05	0.000108	0.000555	0.000191	0.00113	0.001584	0.000203	0.000254	0.000156	0.000812	0.000934
Gordonia sp. PP30	Bacteria	34.4086	0.000655	0.00024	0.000233	0.001165	0.000323	0.000301	0.00101	0.000559	0.00133	0.000375	0.000941	3.2e-05	0.001085	0.000466	0.00062	0.001412	0.000253
Streptomyces pratensis	Bacteria	37.6344	0.000654	3.5e-05	1.8e-05	0.000285	0.002417	0.000125	0.001946	0.000101	0.00015	0.000658	0.000649	6.5e-05	0.001053	9.9e-05	0.000554	0.001907	0.000136
Phyllobacterium sp. 628	Bacteria	35.4839	0.000652	0.000734	2e-05	0.000641	0.000741	9.1e-05	0.000122	0.001671	0.001178	0.000548	0.000759	0.000188	0.000557	0.00074	0.000773	0.0013	0.000337
Bacteroides heparinolyticus	Bacteria	39.7849	0.000648	0.00037	0.000381	0.00216	0.000105	0.000511	0.000428	0.000992	0.000224	0.00066	0.000637	0.000894	0.000539	0.000106	0.000413	0.000552	0.001335
Pseudocitrobacter sp. G163CM	Bacteria	22.5806	0.000648	0.00026	0.001803	0.000464	0.00106	0.000492	0.000977	5.6e-05	0.000215	0.000235	0.001071	0.00019	0.000162	0.001863	3.3e-05	0.001451	0.000313
Rhodococcus globerulus	Bacteria	40.8602	0.000647	0.001143	0.000112	0.001066	0.000737	0.000611	0.000943	0.00017	0.000267	0.000546	0.000751	0.000554	0.001111	0.000625	0.000597	0.000342	0.000647
Rossellomorea marisflavi	Bacteria	40.8602	0.000646	0.000466	0.000306	0.000379	0.000283	1.9e-05	0.002918	0.000241	0.000464	0.000348	0.00095	0.000353	0.002332	0.000506	0.000256	0.000196	0.000197
Actinomyces respiraculi	Bacteria	35.4839	0.000644	0.000809	0.000231	0.000234	1.7e-05	0.000421	0.001136	0.001108	0.001168	0.000677	0.00061	0.000495	0.00087	0.000195	0.000762	0.000447	0.00103
Bacillus amyloliquefaciens	Bacteria	26.8817	0.000642	0.000434	0.00312	8.7e-05	0.000376	5.4e-05	9.3e-05	0.000171	0.001176	0.000837	0.000443	0.000463	0.000286	0.000565	0.000397	5.4e-05	0.002067
Cyanobium sp. NIES-981	Bacteria	36.5591	0.000641	0.000724	0.000496	0.002609	0.000279	0.000213	0.000229	1.7e-05	0.000481	0.00077	0.000509	2.8e-05	0.000302	0.001367	0.000761	0.000658	0.000781
Prevotella sp. E15-22	Bacteria	29.0323	0.000641	3.8e-05	9.6e-05	0.003082	0.000114	0.00132	7.7e-05	0.0001	0.000163	0.00045	0.000835	0.00018	0.000178	2.1e-05	0.000168	0.001106	0.002085
Lysobacter enzymogenes	Bacteria	50.5376	0.00064	0.00024	0.000775	0.001431	0.000477	0.000502	0.000963	0.000316	0.000411	0.000404	0.000881	0.000528	0.000961	0.000659	0.000784	0.000502	0.0004
Citrobacter braakii	Bacteria	15.0538	0.000635	1.3e-05	0.002	0.000242	0.001088	9.9e-05	0.001501	0	0.000311	0.000156	0.001124	0.000216	0.000374	0.002075	2.5e-05	0.001214	5.8e-05
Citrobacter sp. R56	Bacteria	31.1828	0.000635	4.5e-05	0.001737	0.000306	0.000778	0.000343	0.001349	0.000398	0.000287	0.000231	0.001047	0.000492	0.00026	0.001479	5.1e-05	0.00148	0.000142
Burkholderia cenocepacia	Bacteria	37.6344	0.000634	0.000204	0.000414	8.9e-05	0.000132	0.000349	0.00074	0.002036	0.001188	0.000814	0.00045	0.000598	0.000619	0.000313	0.000631	0.001253	0.000347
Streptococcus sp. oral taxon 064	Bacteria	27.957	0.000634	0.000241	0.000363	0.00029	9.6e-05	0.000228	0.000829	0.001953	0.001137	0.000914	0.000348	0.000467	0.000604	0.000662	0.000466	0.001011	0.000585
Thermus scotoductus	Bacteria	17.2043	0.000634	1.1e-05	0.000535	0.000292	7e-06	0.000217	0.00132	0.001947	0.000833	0.000699	0.000567	0.001003	0.000355	0.000353	0.000533	0.001428	0.000118
Bacillus sp. THAF10	Bacteria	44.086	0.000632	9.5e-05	0.000162	0.002248	0.000439	0.000474	0.000505	3.1e-05	0.000977	0.000249	0.001024	0.000203	0.00041	0.000148	0.001612	0.001256	8e-05
Fluviicola taffensis	Bacteria	35.4839	0.000632	0.001002	4.2e-05	0.000755	0.000153	0.001934	0.000728	7.8e-05	0.000223	0.00042	0.000849	9.7e-05	0.000251	0.000506	0.00078	0.000779	0.001332
Streptococcus porcinus	Bacteria	35.4839	0.000632	0.000876	0.000431	0.000648	0.000881	0.000456	0.000444	0.000242	0.001014	0.000691	0.000572	0.001101	0.000565	0.000472	0.000946	6.4e-05	0.000654
Conexibacter sp. SYSU D00693	Bacteria	27.957	0.000631	2.6e-05	0.000702	0.000147	0.000207	4.7e-05	0.000115	0.002907	0.001095	0.001064	0.000188	0.000192	0.000492	0.000768	0.000162	0.001995	0.000165
Rhodococcus opacus	Bacteria	35.4839	0.00063	0.00041	0.000327	0.000163	0.000303	0.000477	0.00087	0.002275	0.000304	0.000758	0.0005	0.000258	0.000936	0.000427	0.000259	0.001793	6.1e-05
Corynebacterium falsenii	Bacteria	30.1075	0.00063	0.000917	0.004081	1.5e-05	2e-06	4.1e-05	0.000229	0.000143	0.000146	0.000967	0.000286	6.5e-05	0.000122	0.000148	0.000162	0.002463	0.000724
Pannonibacter phragmitetus	Bacteria	39.7849	0.00063	0.001592	0.000612	0.000379	0.000188	0.000177	0.000118	0.000928	0.001067	0.000783	0.000474	0.000161	0.000257	0.000363	0.000421	0.000967	0.001549
Bradyrhizobium sp. 200	Bacteria	23.6559	0.00063	4e-06	0.00014	0.000148	8e-06	7.1e-05	0.000392	0.004384	0.00012	0.001154	9.4e-05	0.000105	0.000162	9.5e-05	8.4e-05	0.003218	1.4e-05
Dialister massiliensis	Bacteria	12.9032	0.000629	5e-05	0.000445	2.3e-05	0.000134	4e-06	0	0.001897	0.002558	0.000757	0.000499	4.1e-05	0.001326	4.3e-05	0.001265	0.000883	0.000109
Klebsiella quasivariicola	Bacteria	25.8065	0.00062	1e-06	0.002086	0.000396	0.000646	0.000651	0.00015	0.000955	0.000347	0.000423	0.000821	0.001016	0.001711	0.00048	1.2e-05	0.000266	0.000241
Acidovorax sp. HDW3	Bacteria	31.1828	0.000618	0.001392	0.001433	0.001235	0.000245	0.000205	0.000348	0.000149	3.7e-05	0.000943	0.000287	0.000167	0.000262	0.000739	0.000405	0.001118	0.001006
Acinetobacter sp. SH20PTE14	Bacteria	32.2581	0.000615	0.001531	0.000381	0.000895	0.000479	0.000161	0.000771	0.00035	0.00029	0.000442	0.000791	0.000744	0.000577	0.000717	0.000185	0.000472	0.001015
Desulfovibrio sp. G11	Bacteria	23.6559	0.000614	0.000138	0.000967	0.000424	2.8e-05	5.9e-05	0.000468	0.003034	5.8e-05	0.000522	0.000709	0.000151	0.000314	0.00033	0.000882	0.000818	0.001127
Prevotella jejuni	Bacteria	37.6344	0.000611	0.000112	0.000763	0.002035	0.000143	0.00064	0.000153	7.9e-05	0.00094	0.000497	0.000727	0.000186	0.000349	4.1e-05	0.00079	0.000511	0.001689
Diaphorobacter ruginosibacter	Bacteria	24.7312	0.00061	0.000275	1.4e-05	0.000899	0.00046	0.000199	1.3e-05	0.002426	0.000648	0.000557	0.000665	0.000714	0.000357	0.002164	0.000107	0.000446	7.4e-05
Acetohalobium arabaticum	Bacteria	43.0108	0.000609	0.000488	9e-05	0.000595	8.3e-05	0.000278	0.002876	6.4e-05	0.000267	0.000273	0.000952	0.000117	0.002219	0.000593	0.000415	0.000149	0.000129
Ndongobacter massiliensis	Bacteria	34.4086	0.000607	0.000434	0.000313	0.000545	1.2e-05	0.000185	0.000597	0.002281	0.000582	0.000979	0.000228	0.0003	0.001446	0.000253	0.000812	0.000549	0.00022
Lysinibacillus sp. SGAir0095	Bacteria	44.086	0.000605	0.000279	0.001777	0.000891	0.000223	0.000227	0.000914	0.000487	0.000224	0.000805	0.0004	0.000787	0.000773	0.000244	0.000262	0.000941	0.000586
Rufibacter tibetensis	Bacteria	29.0323	0.000604	0.000359	0.003911	0.00059	3.7e-05	4e-06	8.5e-05	0.000134	0.000223	0.000959	0.000241	0.002637	0.000306	0.000507	0.000246	2e-05	2.1e-05
Staphylococcus roterodami	Bacteria	22.5806	0.000603	2.6e-05	0.002623	0.000101	2.1e-05	1e-06	0.000356	2.6e-05	0.001957	0.000728	0.000475	2.8e-05	0.000313	0.000468	0.000269	3.4e-05	0.002452
Duncaniella dubosii	Bacteria	34.4086	0.000601	0.000239	0.000118	0.002475	0.000235	3e-06	0.000717	0.000882	8.3e-05	0.000707	0.000493	0.000707	0.000388	0.00068	0.000152	0.000383	0.001314
Cytobacillus ciccensis	Bacteria	48.3871	0.000601	0.000537	0.000512	0.002092	0.000331	0.000427	0.000184	0.000457	0.000242	0.000474	0.000731	0.000551	0.000306	0.001121	0.000982	0.000364	0.000344
Schaalia turicensis	Bacteria	35.4839	0.0006	0.000885	0.000193	0.00015	0.0002	0.000528	0.000369	0.001255	0.00121	0.000767	0.00043	0.000727	0.001573	0.000349	0.000532	4.1e-05	0.000357
Leuconostoc kimchii	Bacteria	15.0538	0.000598	0.000526	8.5e-05	9.2e-05	0.000145	0.000975	0	0.001661	0.001302	0.000955	0.000233	0.000607	0.000327	0.000376	0.00049	0.001114	0.000645
Streptomyces sp. TN58	Bacteria	22.5806	0.000596	3.1e-05	0.002996	0.000716	1.6e-05	3.7e-05	1.1e-05	0.00136	6.1e-05	0.000955	0.000228	0.001955	5.7e-05	0.000529	9.5e-05	0.000994	2e-05
Paucilactobacillus nenjiangensis	Bacteria	22.5806	0.000595	2.1e-05	3.9e-05	0.00067	0.003526	1.5e-05	8e-06	3.2e-05	0.000313	0.000186	0.001014	0.00012	4.1e-05	2.6e-05	3e-05	0.000671	0.002583
Vibrio nigripulchritudo	Bacteria	39.7849	0.000595	0.00047	5.8e-05	0.000554	4.5e-05	0.000434	0.002444	0.000475	0.000181	0.000942	0.00024	0.001828	0.000112	0.000654	0.000194	0.000504	0.000364
Amycolatopsis sp. Hca4	Bacteria	26.8817	0.000595	0.001235	4.8e-05	0.000115	0.001693	9e-06	4e-06	0.001546	9.7e-05	0.000402	0.000792	0.001364	6.9e-05	5.5e-05	6.6e-05	0.001921	7.5e-05
Cellulosimicrobium cellulans	Bacteria	24.7312	0.000595	0.000185	7.4e-05	1.9e-05	0.000142	0.000167	0.000135	0.003914	0.000309	0.001038	0.000141	0.000295	0.000305	8.5e-05	0.000157	0.002502	0.000141
Paenibacillus agaridevorans	Bacteria	29.0323	0.000593	0.000338	3.2e-05	0	0.003097	9.3e-05	0.000359	2.1e-05	0.000661	0.000905	0.000274	0.000212	0.000173	0.000348	0.000455	0.002246	6.8e-05
Clostridium sp. DL-VIII	Bacteria	46.2366	0.000592	0.000751	0.000444	0.00054	0.000101	0.000376	0.000539	0.000267	0.001666	0.000487	0.000699	0.000549	0.000529	0.000518	0.000424	0.00098	0.00054
Yersinia similis	Bacteria	40.8602	0.000589	0.000989	0.000454	0.000532	0.000864	0.000315	0.000459	0.000866	0.000233	0.0003	0.000884	0.00041	0.000417	0.000463	0.001143	0.000808	0.000267
Prevotella oris	Bacteria	25.8065	0.000589	8e-06	0.000357	0.002539	5.7e-05	0.001117	9.6e-05	0.000376	0.000101	0.000438	0.000743	0.000222	7.7e-05	1e-06	0.000172	0.000906	0.002057
Bradyrhizobium sp. 170	Bacteria	26.8817	0.000583	1.3e-05	6.8e-05	0.000119	5e-06	3e-05	0.000475	0.003935	0.00021	0.001044	0.000111	0.000182	0.000174	3.6e-05	9.4e-05	0.002858	5.9e-05
Vagococcus lutrae	Bacteria	48.3871	0.000581	0.000655	0.000187	0.001074	0.000609	0.000227	0.00125	0.000115	0.000426	0.000422	0.000744	0.000623	0.000387	0.000475	0.000113	0.000845	0.001031
Yokenella regensburgei	Bacteria	32.2581	0.000575	5.8e-05	0.001449	0.000262	0.00055	0.000426	0.001121	0.000472	0.000401	0.000279	0.000879	0.000276	0.000221	0.001317	0.000118	0.001331	0.000263
Mycolicibacterium fortuitum	Bacteria	35.4839	0.000575	0.000131	0.000237	7.9e-05	0.000309	6.1e-05	0.002845	0.000782	0.000114	0.000197	0.000961	7.3e-05	0.000289	0.000108	0.000232	0.00049	0.002166
Rhodococcus sp. S2-17	Bacteria	29.0323	0.000573	0.000793	0.000103	0.000715	0.000105	0.00034	0.000202	0.000371	0.001863	0.000369	0.000782	0.00031	0.000164	0.000508	0.000595	0.001309	0.000529
Mycobacterium tuberculosis	Bacteria	26.8817	0.000573	0.000121	6.6e-05	0.001743	0.001437	9e-06	6.3e-05	0.000983	0.000111	0.000744	0.000398	0.000736	0.000448	0.001219	3.2e-05	0.001046	4.7e-05
Afipia sp. GAS231	Bacteria	22.5806	0.000572	1.2e-05	3.3e-05	0.000431	0.000189	1e-05	0.001959	0.00189	7.3e-05	0.001003	0.000132	0.001407	0.000649	0.000101	1e-05	0.00121	5e-05
Flavobacterium jumunjinense	Bacteria	40.8602	0.00057	0.000895	0.000425	0.001421	0.000416	0.000128	0.000701	0.000455	8.6e-05	0.00047	0.000673	0.000551	0.000878	0.000571	0.000548	0.00075	0.000121
Cellulophaga lytica	Bacteria	41.9355	0.00057	0.000641	0.000354	0.000464	0.001095	0.00032	0.001163	0.000334	0.000134	0.000538	0.000602	0.001091	0.001157	0.000196	0.000607	0.000191	0.000164
Filifactor alocis	Bacteria	31.1828	0.000568	0.001028	0.000135	0.000163	5.4e-05	0.001128	0.000252	0.000763	0.000966	0.000678	0.000456	0.000554	0.000891	0.000706	0.000849	3.4e-05	0.00039
Cohnella sp. LGH	Bacteria	41.9355	0.000568	0.00046	0.000274	0.001193	0.000667	0.000137	0.000417	0.000722	0.000636	0.000503	0.000634	0.000465	0.000687	0.000267	0.000991	0.000885	6.9e-05
Actinomyces slackii	Bacteria	39.7849	0.000567	0.00092	0.000334	0.000181	4.7e-05	0.000706	0.000371	0.000761	0.001191	0.000668	0.000464	0.000546	0.000914	0.000185	0.001105	0.000205	0.000397
Ramlibacter tataouinensis	Bacteria	43.0108	0.000565	0.000451	0.000336	0.000529	0.000245	0.000391	0.000124	0.001778	0.000729	0.000807	0.000318	0.0006	0.000227	0.000251	0.000587	0.001031	0.000656
Phascolarctobacterium succinatutens	Bacteria	34.4086	0.000565	7.8e-05	0.000175	0.000217	0.000111	3.4e-05	0.000174	0.002907	0.00095	0.000891	0.000231	0.000148	0.000795	0.000215	0.000315	0.00151	0.000335
Enterobacter sp. E76	Bacteria	26.8817	0.000563	2e-06	0.000934	0.001125	0.000385	0.000254	0.001281	0.000424	0.000149	0.00041	0.00072	0.000133	0.000731	0.001057	3.8e-05	0.001302	0.000151
Sphingomonas sp. HMP9	Bacteria	15.0538	0.000561	5e-06	6e-05	7.3e-05	1e-06	1.7e-05	0.000224	0.004144	0.000181	0.001022	9.1e-05	0.000157	0.000177	1.1e-05	0.000167	0.002762	0
Tardiphaga sp. 37S4	Bacteria	20.4301	0.000559	0.000205	0.000147	0.000273	0.00049	1.5e-05	0.000449	0.002028	0.000922	0.000498	0.000622	4.7e-05	0.000734	0.000471	7.6e-05	0.001985	0
Thermomonas brevis	Bacteria	38.7097	0.000557	0.00055	0.000344	0.000938	0.000349	0.000157	0.000101	0.001952	0.000147	0.000368	0.000751	3.2e-05	0.000408	0.001727	0.00049	0.000556	0.000245
Calothrix sp. PCC 7507	Bacteria	35.4839	0.000556	0.000443	8.8e-05	0.000612	7e-06	0.000743	0.001417	0.000616	0.000451	0.000402	0.000714	5.3e-05	0.001075	0.000404	0.000515	0.000965	0.000277
Colwellia sp. 20A7	Bacteria	38.7097	0.000553	9.7e-05	9.6e-05	0.000271	0.000114	0.001669	0.00067	7.2e-05	0.001321	0.000611	0.000495	0.000481	0.000315	0.000146	0.000262	0.001904	0.000157
Clostridium tetani	Bacteria	47.3118	0.000553	0.000786	0.000172	0.000683	0.000163	0.000103	0.001033	0.000376	0.001028	0.000661	0.000442	0.000778	0.000584	0.000518	0.000579	0.000696	0.000171
Pseudoalteromonas agarivorans	Bacteria	22.5806	0.000551	3.4e-05	0.000476	0.000341	0.00053	0.001586	0.000366	0.000928	0.000162	0.000471	0.000632	0.000304	0.000369	0.000891	0.001309	0.000256	0.000202
Streptosporangium sp. caverna	Bacteria	36.5591	0.000548	0.000114	0.000172	0.000298	0.000225	0.000154	0.000171	0.003079	0.000322	0.000747	0.000345	5.3e-05	0.000299	0.000507	0.00036	0.001989	4.6e-05
Aeromonas veronii	Bacteria	39.7849	0.000547	0.000263	0.000752	0.0003	9.8e-05	0.000154	0.001675	0.000936	0.000265	0.000475	0.00062	0.000706	0.001154	0.000367	0.000204	0.000762	7.6e-05
Clostridium butyricum	Bacteria	45.1613	0.000547	0.000671	0.000383	0.00089	0.000331	0.000326	0.000365	0.000446	0.000927	0.000461	0.000634	0.000582	0.000921	0.0004	0.0007	0.000387	0.000276
Citrobacter farmeri	Bacteria	30.1075	0.000546	2.2e-05	0.001829	0.000281	0.000729	0.000319	0.001005	7.7e-05	0.000281	0.000146	0.000955	0.000203	0.000268	0.001395	0.000115	0.001266	0.000114
Staphylococcus haemolyticus	Bacteria	31.1828	0.000542	0.000225	0.001288	0.000531	8.1e-05	4.2e-05	0.001065	6.2e-05	0.001125	0.0005	0.000584	0.000231	0.000291	0.000338	0.000537	9.7e-05	0.001712
Sphingobacterium sp. G1-14	Bacteria	33.3333	0.000539	0.001127	0.000271	0.00088	0.000396	0.00034	0.000638	0.00034	0.000257	0.000571	0.000506	0.000139	0.000627	0.000233	0.000625	0.00134	0.000205
Rubrobacter marinus	Bacteria	26.8817	0.000537	0.000863	7.4e-05	1.2e-05	0.001514	0.000186	0.000176	0.001432	4e-05	0.000789	0.00028	2.6e-05	0.000143	1.9e-05	0.000104	0.002229	0.000606
Denitrobacterium detoxificans	Bacteria	31.1828	0.000537	0.000443	0.000994	0.000422	0.00014	0.000784	0.000168	0.000746	0.000694	0.000412	0.000665	0.000442	0.000949	0.000179	0.001055	3.9e-05	0.000509
Amycolatopsis albispora	Bacteria	48.3871	0.000536	0.000972	0.000253	0.001453	0.000357	0.000126	0.000364	0.000375	0.000328	0.000673	0.000396	0.000207	0.000398	0.000901	0.0003	0.000903	0.000534
Aeromonas dhakensis	Bacteria	26.8817	0.000535	0.000471	3.8e-05	0.001192	0.000488	0.00026	0.00092	0.000803	4.4e-05	0.000618	0.000449	0.000748	0.000534	0.000897	0.000422	0.000611	5.6e-05
Ezakiella coagulans	Bacteria	30.1075	0.000535	0.00101	0.000271	0.000686	7.1e-05	0.000352	0.000756	0.000464	0.000617	0.000796	0.000267	0.000627	0.000913	0.000279	0.00113	2.1e-05	0.00021
Liquorilactobacillus hordei	Bacteria	48.3871	0.000529	0.000637	0.000543	0.000518	0.000319	0.000445	0.000921	0.000804	7.5e-05	0.000468	0.000592	0.000282	0.000386	0.000245	0.000423	0.001506	0.000285
[Enterobacter] lignolyticus	Bacteria	29.0323	0.000528	6.7e-05	0.001592	0.000215	0.000588	0.000363	0.000997	0.000183	0.000365	0.000171	0.000892	0.000168	0.000264	0.001353	7.1e-05	0.001126	0.000265
Enterobacter roggenkampii	Bacteria	24.7312	0.000527	2e-06	0.001549	0.000467	0.000708	0.000239	0.000995	0.000105	0.000287	0.000184	0.000877	0.000279	0.000294	0.001283	0.000191	0.001083	0.000112
Vibrio cholerae	Bacteria	30.1075	0.000527	4.2e-05	0.000402	0.000203	9.1e-05	4.3e-05	0.001768	0.001222	0.000479	0.000376	0.000681	0.001413	0.000319	0.000324	0.000187	0.000925	2.3e-05
Propionibacterium acidifaciens	Bacteria	31.1828	0.000526	0.000643	0.000226	0.000153	2.2e-05	0.000455	0.000898	0.000194	0.001541	0.000539	0.000514	0.000483	0.000763	0.000277	0.000576	0	0.001025
Vogesella sp. XCS3	Bacteria	32.2581	0.000526	0.001764	0.000312	0.000829	0.000388	0.000209	0.00037	0.000141	0.000127	0.000752	0.000295	0.000244	0.000562	0.000622	0.000306	0.000256	0.00116
Corynebacterium simulans	Bacteria	24.7312	0.000524	2.6e-05	5.2e-05	4.4e-05	2.1e-05	4.8e-05	0.000147	0.00373	0.000316	0.000948	9.1e-05	5.9e-05	0.002651	0.000219	1.7e-05	3.6e-05	9.7e-05
Sphingobium yanoikuyae	Bacteria	23.6559	0.000523	0.000167	0.000425	2e-05	1.8e-05	5.7e-05	0.000859	0.001919	0.000818	0.000712	0.00033	0.000657	0.000329	8.6e-05	0.000808	0.001163	4.8e-05
Desulfovibrio sp. 86	Bacteria	32.2581	0.000522	1.8e-05	0.0014	0.000785	2.5e-05	4e-06	0.000222	0.001739	0.000231	0.000253	0.000796	0.000693	0.000297	7.9e-05	0.000875	0.000193	0.000949
Mycobacterium dioxanotrophicus	Bacteria	46.2366	0.000521	0.000687	0.000546	0.000956	0.000834	0.000225	0.000285	0.000305	0.000317	0.00032	0.000727	0.000168	0.000601	0.000235	0.000716	0.000965	0.000385
Streptococcus sp. NPS 308	Bacteria	34.4086	0.000521	0.000337	0.000206	0.000468	0.000152	0.000487	0.000608	0.00085	0.001033	0.000644	0.000395	0.000322	0.000485	0.000518	0.001132	0.000195	0.000461
Nanosynbacter sp. HMT-352	Bacteria	32.2581	0.000521	0.000211	0.00055	0.000832	5e-06	0.000169	0.000507	0.001096	0.000849	0.000781	0.000255	0.000484	0.00077	0.000276	0.001091	0.000307	0.000164
Vibrio alginolyticus	Bacteria	45.1613	0.00052	0.00094	0.000557	0.0007	0.000372	0.000462	0.000476	0.000239	0.0004	0.000482	0.000559	0.000568	0.000562	0.000671	0.000616	0.000337	0.00039
Oleidesulfovibrio alaskensis	Bacteria	33.3333	0.000519	4e-06	0.000894	5e-05	7e-05	3.6e-05	0.001193	0.001834	0.000247	0.0005	0.00054	0.000238	0.000139	0.0005	0.000982	0.00028	0.000957
Mycolicibacterium rutilum	Bacteria	37.6344	0.000519	0.000118	0.000244	0.001223	0.000135	0.000126	0.000299	0.001863	0.000209	0.000885	0.000144	0.001169	0.000178	0.000534	0.000287	0.000394	0.000592
Citrobacter werkmanii	Bacteria	21.5054	0.000518	6e-06	0.001442	0.000197	0.000801	0.000681	0.000819	0.000102	0.000219	0.000221	0.000823	0.000202	0.000164	0.001362	4.6e-05	0.001096	0.000327
Haemophilus haemolyticus	Bacteria	37.6344	0.000518	0.001464	0.000872	0.000806	1.6e-05	0.000565	0.000315	2e-05	0.000105	0.000552	0.000484	0.000682	0.00027	0.000666	0.000418	0.000271	0.000832
Stanieria cyanosphaera	Bacteria	40.8602	0.000518	9.8e-05	0.000351	0.001292	0.000267	0.000433	0.000778	0.000174	0.000696	0.000539	0.000497	0.000166	0.000741	0.000335	0.000215	0.000754	0.000853
Paenibacillus sp. DCT19	Bacteria	30.1075	0.000518	0.000192	0.000183	0.000189	0.002587	1.4e-05	0.000137	5.4e-05	0.000693	0.000162	0.000882	0.000215	0.000242	0.000381	0.000237	0.001879	0.000116
Citrobacter rodentium	Bacteria	29.0323	0.000516	1.6e-05	0.001699	0.000312	0.000756	0.000236	0.000907	9.8e-05	0.000267	0.000145	0.000896	0.00015	0.000287	0.00126	0.000209	0.001109	0.000152
Paracoccus jeotgali	Bacteria	38.7097	0.000516	0.000379	0.000145	0.001043	0.000326	0.000381	0.000622	0.0002	0.00094	0.000483	0.000549	0.00036	0.000572	0.000202	0.000308	0.001002	0.0006
Paraburkholderia caribensis	Bacteria	40.8602	0.000514	0.00046	0.000112	0.000235	2.1e-05	0.000368	0.000264	0.001759	0.000929	0.000662	0.000363	0.000119	0.000378	0.000498	0.000393	0.001293	0.000376
Sphingomonas insulae	Bacteria	23.6559	0.000514	1.1e-05	0.000261	0.000152	0.000175	8.5e-05	0.001301	0.001522	0.000644	0.000532	0.000495	0.001007	0.00042	0.0001	0.000686	0.000843	5e-06
Geodermatophilus obscurus	Bacteria	22.5806	0.000512	0.000167	9.9e-05	0	3e-05	7e-06	1.8e-05	0.003945	4.7e-05	0.000972	4.3e-05	6.4e-05	5.3e-05	0.000156	4.1e-05	0.002659	2.8e-05
Clostridium baratii	Bacteria	34.4086	0.000512	0.000507	0.000212	0.000229	5.9e-05	0.000182	0.002171	0.000213	0.000449	0.000779	0.000239	0.001552	0.000302	0.000265	0.000826	3.7e-05	0.000123
Prevotella bryantii	Bacteria	35.4839	0.000512	0.000221	0.000135	0.001611	0.000135	0.000869	0.000414	0.000496	0.000149	0.000374	0.000652	0.000186	0.000521	5e-05	0.000407	0.000653	0.001177
Staphylococcus schweitzeri	Bacteria	16.129	0.000512	1.7e-05	0.002256	0.000107	1e-06	0	0.000251	1.8e-05	0.001694	0.000603	0.000418	7e-06	0.000358	0.000417	0.00019	0	0.002056
Candidatus Formimonas warabiya	Bacteria	40.8602	0.000511	0.000193	0.000187	0.000964	0.000525	0.000217	0.000105	0.001559	0.000373	0.000593	0.000428	0.001023	0.00032	0.000543	0.000473	0.000256	0.000488
Streptococcus urinalis	Bacteria	29.0323	0.000508	5e-05	0.000486	0.001009	0.001044	5.3e-05	0.000183	0.00012	0.001085	0.000354	0.000666	0.000867	0.000433	0.000525	0.000176	8.1e-05	0.000992
Paenibacillus graminis	Bacteria	49.4624	0.000506	0.000588	0.000693	0.000533	0.000638	0.000409	0.00046	0.000552	0.000209	0.000422	0.000592	0.000474	0.000646	0.000675	0.000317	0.000664	0.000278
Burkholderia multivorans	Bacteria	31.1828	0.000505	0.000805	0.000353	0.000171	2.9e-05	7.9e-05	0.000469	0.001333	0.000846	0.000471	0.00054	0.000297	0.000884	0.000382	0.000445	0.000871	0.000123
Kosakonia cowanii	Bacteria	31.1828	0.000505	0.000287	0.001347	0.00021	0.000585	0.000307	0.000927	7.1e-05	0.00041	0.000209	0.000808	0.000387	0.000295	0.001246	0.000104	0.000967	0.000115
Mongoliitalea daihaiensis	Bacteria	38.7097	0.000504	0.000207	0.000409	0.000599	0.000256	0.001176	0.000691	1.3e-05	0.000626	0.000427	0.000583	0.000236	0.000309	0.000363	0.000843	0.000996	0.000244
Streptomyces broussonetiae	Bacteria	35.4839	0.000504	0.000162	0.000549	0.000399	0.000339	0.001383	3.1e-05	0.000492	0.000685	0.00038	0.00063	3e-05	0.000421	0.000791	0.000465	0.000825	0.000497
Cutibacterium avidum	Bacteria	31.1828	0.000504	0.000349	0.000163	0.000107	4.1e-05	1.4e-05	0.000197	0.002572	0.000701	0.000829	0.000171	0.00017	0.001816	0.000332	0.000311	2.8e-05	0.000321
Pseudocnuella soli	Bacteria	29.0323	0.000503	0.000288	1.4e-05	8.8e-05	0.000321	7e-05	0.001842	0.0012	0.000181	0.000477	0.00053	0.000573	0.001182	0.000342	1e-05	0.000784	0.000114
Corynebacterium sp. FDAARGOS 1242	Bacteria	15.0538	0.000502	1.9e-05	0.000132	0.000456	0	0	9e-06	0.003311	0.000263	0.000922	7.3e-05	9e-06	0.002391	0.000159	0.000324	0	5.7e-05
Mycolicibacterium neoaurum	Bacteria	31.1828	0.000502	8.6e-05	0.000206	0.000201	1.1e-05	4.3e-05	0.000198	0.002681	0.00072	0.000803	0.000194	0.000146	0.000219	0.00023	0.000317	0.00183	0.000211
Brevibacterium casei	Bacteria	32.2581	0.000502	4e-05	0.000341	7.4e-05	3.1e-05	0.00018	0.00019	0.003087	0.000259	0.000865	0.00013	0.000195	0.000282	3.7e-05	0.000328	0.001952	0.000138
Agrobacterium tumefaciens	Bacteria	36.5591	0.000501	0.000464	0.000484	0.000426	9e-05	0.000143	0.000289	0.001094	0.001067	0.000475	0.000528	0.000395	0.000694	0.000504	0.00062	0.000459	0.000329
Parageobacillus thermoglucosidasius	Bacteria	33.3333	0.000501	8.9e-05	0.000249	0.00035	0.000218	0.00024	0.001576	0.000571	0.000679	0.000414	0.00059	0.001292	0.000416	9.3e-05	0.000343	0.00052	0.000341
Vulcanisaeta moutnovskia	Bacteria	25.8065	0.000501	0.000653	0.000214	0.000538	0.00051	0.000654	0.000546	0.000577	0.000276	0.000444	0.000559	0.000194	0.000366	0.000889	0.00055	0.000814	0.000224
Corynebacterium timonense	Bacteria	32.2581	0.000501	0.000204	0.000748	0.000425	0.00013	0.00103	0.001242	0.000127	0.000109	0.000745	0.000251	0.001059	0.000302	0.000152	0.000837	0	0.000645
Ruminococcus bovis	Bacteria	34.4086	0.000499	0.0005	0.00073	0.000445	0.000259	0.00011	0.000197	0.000497	0.001295	0.000614	0.000382	0.000417	0.000857	0.00058	0.000784	4.2e-05	0.000322
Paenibacillus mucilaginosus	Bacteria	39.7849	0.000498	0.000116	0.000321	0.000201	4e-05	0.000267	0.001111	0.001145	0.00081	0.00055	0.000445	0.000841	0.000357	0.000185	0.000585	0.000821	0.000184
Enterobacter ludwigii	Bacteria	26.8817	0.000497	2.3e-05	0.001061	0.000356	0.000872	0.000251	0.001044	0.000241	0.000204	0.000167	0.000835	0.000449	0.00034	0.000934	0.000382	0.000834	9.6e-05
Streptomyces lydicus	Bacteria	41.9355	0.000497	0.000788	0.000188	0.001093	0.000128	0.000147	0.000145	0.001136	0.000351	0.000657	0.000333	0.000241	0.00044	0.000278	0.000747	0.000765	0.000467
Vallitalea guaymasensis	Bacteria	39.7849	0.000495	0.000315	0.000325	0.00052	9.5e-05	0.000331	0.000897	0.000271	0.001163	0.000579	0.00041	0.000562	0.000421	0.000661	0.000801	0.000192	0.00036
Phoenicibacter congonensis	Bacteria	40.8602	0.000495	8.7e-05	0.000417	0.000913	0.000432	0.000233	0.000299	0.000324	0.001228	0.000462	0.000528	0.000561	0.000362	0.000969	0.000527	0.000483	0.000133
Pseudolabrys taiwanensis	Bacteria	21.5054	0.000495	1.5e-05	0.000208	0.000696	1e-06	4e-06	3.2e-05	0.003122	5.1e-05	0.000758	0.000227	4.2e-05	7.6e-05	0.000569	0.000134	0.002083	4.5e-05
Corynebacterium singulare	Bacteria	24.7312	0.000493	6.9e-05	0.000151	0.00013	1.4e-05	2e-06	0.0001	0.003284	0.00037	0.00088	9.8e-05	5.6e-05	0.002421	0.000182	6.2e-05	9.1e-05	7.9e-05
Crassaminicella thermophila	Bacteria	30.1075	0.00049	0.00022	0.000122	0.000355	0.000136	0.000124	0.002256	9.2e-05	0.000523	0.00081	0.000164	0.000247	0.000241	0.002032	0.000458	6.9e-05	7.3e-05
Ensifer alkalisoli	Bacteria	34.4086	0.00049	0.000312	3.4e-05	0.002004	0.000124	0.000219	0.00032	0.000612	0.000233	0.000515	0.000465	3.1e-05	0.000184	0.001003	0.000345	0.001097	0.000318
Gordonia otitidis	Bacteria	13.9785	0.00049	1.2e-05	0.000161	7e-06	2e-06	3e-06	5.4e-05	0.003898	1.1e-05	0.000965	4e-06	1.7e-05	2.2e-05	1e-06	0.000104	0.002704	0
Synechococcus elongatus	Bacteria	35.4839	0.000489	1.4e-05	0.000118	0.000822	0.00196	7e-06	6.1e-05	0.000703	0.00018	0.000635	0.000339	3.8e-05	9.8e-05	8.4e-05	7.8e-05	0.001955	0.000599
Streptomyces sp. CdTB01	Bacteria	32.2581	0.000486	0.000401	7.2e-05	0.000252	3e-05	0.00045	0.00026	0.002246	0.000259	0.000703	0.000265	0.000211	0.00044	0.000118	0.000446	0.001504	0.000137
Paraburkholderia edwinii	Bacteria	25.8065	0.000485	0.000264	0.000499	0.000616	0.000499	9.4e-05	0.000109	0.001861	5.2e-05	0.000235	0.00074	5.3e-05	0.001484	6e-06	0.000456	0.000338	0.000485
Xanthomonas citri	Bacteria	23.6559	0.000483	0.000145	0.000265	8.6e-05	3.4e-05	0.00027	0.000298	0.000367	0.002351	0.000222	0.000749	0.000352	0.00012	0.000339	0.000334	0.001667	5.8e-05
Vibrio coralliilyticus	Bacteria	26.8817	0.000482	0.000115	0.000194	0.001387	5e-06	6.5e-05	0.000155	0.001973	4.2e-05	0.000187	0.000784	8.2e-05	0.000419	0.001656	7.9e-05	0.000775	4e-06
Staphylococcus equorum	Bacteria	26.8817	0.000481	0.001126	0.000205	0.0002	0.00193	3e-05	1.8e-05	3.4e-05	0.000224	0.000805	0.000151	0.000617	0.000214	8.4e-05	0.00019	0.001574	0.000169
Pluralibacter gergoviae	Bacteria	31.1828	0.000481	5e-06	0.000874	0.000197	0.000976	0.000125	0.000639	0.000939	0.000199	0.000259	0.000708	0.000135	0.000265	0.00076	0.000649	0.001015	7.7e-05
[Haemophilus] ducreyi	Bacteria	36.5591	0.000478	0.000313	0.000178	0.000593	5.9e-05	0.000264	0.001504	0.000463	0.000396	0.000564	0.00039	0.000691	0.000555	0.000406	0.000424	0.000676	0.00012
Anoxybacillus caldiproteolyticus	Bacteria	32.2581	0.000475	2.7e-05	0.000179	0.000373	6.6e-05	0.000227	0.000826	0.001746	0.000413	0.00055	0.000399	0.00067	0.000256	0.000125	0.00036	0.001399	7e-06
Gardnerella leopoldii	Bacteria	12.9032	0.000474	3e-06	9.2e-05	0	7e-06	0.000471	5.9e-05	0.00053	0.00257	0.000913	2.6e-05	6e-06	0.000423	6.5e-05	0.002209	0	6.1e-05
Geobacter benzoatilyticus	Bacteria	26.8817	0.000472	0.000182	8e-05	0.000241	0.000521	8e-06	0.000312	0.000656	0.001725	0.000233	0.000716	0.000277	0.000596	0.000184	0.000398	0.001229	9.9e-05
Prevotella veroralis	Bacteria	23.6559	0.000471	1.5e-05	0.000461	0.000986	0.000102	0.001264	1.8e-05	0.000675	0.000264	0.000562	0.000378	0.000124	0.000137	4e-06	0.000459	0.001055	0.000969
Clavibacter michiganensis	Bacteria	36.5591	0.00047	0.00012	0.000336	0.000204	7.5e-05	0.000298	0.000119	0.0023	0.000438	0.00071	0.000225	0.00027	0.000407	0.000116	0.000296	0.001426	0.000248
Mycobacterium avium	Bacteria	34.4086	0.00047	0.000338	0.000441	0.000774	1.5e-05	0.0002	0.000738	0.000514	0.000737	0.000507	0.000431	0.000266	0.000585	0.000579	0.000446	0.000763	0.00018
Bifidobacterium lemurum	Bacteria	30.1075	0.000469	0.000651	0.000185	0.000811	0.000183	0.000419	0.000342	0.000577	0.000547	0.000473	0.000466	0.000707	0.000687	0.00026	0.000789	0.000289	7.3e-05
Romboutsia hominis	Bacteria	33.3333	0.000469	0.000349	0.000513	0.000795	4.5e-05	0.000389	0.00035	0.000155	0.001135	0.000455	0.000483	0.000891	0.000616	0.000402	0.000449	0.000185	0.000287
Muribaculum gordoncarteri	Bacteria	39.7849	0.000466	9.5e-05	0.000165	0.000879	0.000236	0.000312	0.000458	0.001308	0.000297	0.00038	0.000554	0.000427	0.00038	0.000538	0.000155	0.000942	0.000361
Gardnerella swidsinskii	Bacteria	10.7527	0.000465	3.4e-05	3.8e-05	0	0	0	1.8e-05	0.000347	0.0032	0.000914	5e-06	1e-05	0.000265	4.3e-05	0.00239	0	0
Yersinia frederiksenii	Bacteria	31.1828	0.000464	0.000413	0.000194	0.000378	0.001184	0.000162	0.000492	0.00047	0.000372	0.000443	0.000485	0.000528	0.000971	0.000766	0.000269	0.000217	7.3e-05
Cellulosilyticum sp. WCF-2	Bacteria	31.1828	0.000463	0.000268	0.000845	0.000166	0.000289	0.000326	0.000551	0.000146	0.001147	0.000454	0.000472	0.000504	0.000716	0.000397	0.000692	0.000307	0.000155
Kluyvera ascorbata	Bacteria	19.3548	0.000461	4e-06	0.001397	0.000203	0.000579	0.000246	0.000816	0.000427	0.000171	0.000135	0.000795	0.000103	0.00014	0.001187	0.000198	0.001068	0.00014
Brenneria izadpanahii	Bacteria	25.8065	0.000461	0.000442	0.000194	0.000377	0.001383	1e-05	0.001131	2.1e-05	5.1e-05	0.000465	0.000457	7e-06	0.00105	0.001157	0.000116	0.000486	9e-06
Dechloromonas denitrificans	Bacteria	35.4839	0.000457	0.000304	7.4e-05	0.000415	0.0001	8.4e-05	0.000437	0.002158	0.000161	0.000688	0.000221	0.000104	0.000267	5.8e-05	0.000202	0.00189	0.000147
Modestobacter sp. L9-4	Bacteria	21.5054	0.000456	2.1e-05	3.8e-05	3.5e-05	7e-06	1.3e-05	7.1e-05	0.003609	5.1e-05	0.000857	4.7e-05	7.2e-05	9.1e-05	6e-06	3.5e-05	0.002447	7e-06
Geosporobacter ferrireducens	Bacteria	31.1828	0.000456	0.00031	0.000333	0.000108	0.000153	0.000129	0.001739	0.000141	0.000687	0.000304	0.000611	0.000436	0.001341	0.000421	0.000358	1.9e-05	0.000154
Rhodoferax sp. AJA081-3	Bacteria	36.5591	0.000455	0.000555	0.000558	0.000607	5e-06	0.000426	0.00034	0.000292	0.000863	0.000404	0.000508	0.000515	0.000361	0.000335	0.000185	0.000819	0.000504
Nocardioides sp. G188	Bacteria	27.957	0.000455	0.002236	0.000153	0.000584	1.2e-05	0.000173	8.4e-05	0.000238	9.1e-05	5.9e-05	0.000859	9.1e-05	0.000112	8.8e-05	0.000406	0.000195	0.001768
Sphingomonas taxi	Bacteria	27.957	0.000453	9.8e-05	0.000275	0.000267	4e-06	0.000108	0.001183	0.000929	0.000772	0.000479	0.000427	0.000885	0.000499	5.6e-05	0.000706	0.00042	0.00013
Limosilactobacillus gastricus	Bacteria	24.7312	0.000453	0.000373	0.000514	0.000352	6e-06	0.001012	0.000155	0.001161	0.000121	0.000383	0.000525	2.1e-05	0.001174	0.000351	0.000483	0.000371	0.000278
Lactobacillus sp. JM1	Bacteria	11.828	0.000451	0	0.000612	0	0.00026	0.000696	0	0.000882	0.001224	0.000554	0.000347	0.000243	0.001495	0.000482	0	0.000198	0.000281
Arthrobacter sp. NicSoilB4	Bacteria	33.3333	0.000451	0.000369	4e-05	0.000518	0	0.000252	0.001331	6.8e-05	0.000928	0.000171	0.000737	0.000141	0.000261	0.000349	0.000117	0.000956	0.000849
Richelia sinica	Bacteria	24.7312	0.000451	0.000112	0.000118	9.1e-05	1.7e-05	0.00309	8e-06	2.6e-05	5.2e-05	0.000792	0.000102	2.3e-05	3.2e-05	0.000121	0.002304	0	0.000156
Brachybacterium sp. CBA3104	Bacteria	24.7312	0.00045	0.000243	7.6e-05	0.000287	0.000141	0.000108	0.002556	6.2e-05	3.5e-05	0.00015	0.000757	0.000168	0.000162	3.5e-05	0.000211	7.8e-05	0.001978
Kaustia mangrovi	Bacteria	21.5054	0.00045	1.7e-05	0.000898	2.1e-05	0.001254	7e-06	4e-05	0.001242	0.00026	0.000724	0.00017	2.2e-05	4.5e-05	0.000485	7.8e-05	0.001859	0.000187
Nocardia terpenica	Bacteria	40.8602	0.00045	0.001135	8.8e-05	0.000697	0.000105	0.000505	0.000484	0.000166	0.000332	0.000399	0.000501	0.000189	0.000241	0.00032	0.00076	0.0011	5.5e-05
Citrobacter pasteurii	Bacteria	23.6559	0.000449	9e-06	0.000749	0.000196	0.000482	0.000464	0.001528	7.6e-05	0.000106	0.00013	0.000775	0.000145	0.000117	0.000809	0.000768	0.000693	0.000187
Enterobacter sp. SA187	Bacteria	29.0323	0.000448	0.000148	0.001388	0.000262	0.00055	0.000289	0.000715	5.1e-05	0.000302	0.000167	0.000735	0.000103	0.000248	0.001193	7.5e-05	0.001005	0.000133
Conexibacter woesei	Bacteria	22.5806	0.000443	0.000129	2.1e-05	1e-05	1e-05	0.000134	0.000132	0.003215	5.7e-05	0.000789	9.1e-05	0.000193	0.000171	3.3e-05	0.000124	0.002049	2.3e-05
Paucilactobacillus oligofermentans	Bacteria	46.2366	0.000441	0.000117	0.000377	0.001049	0.000911	0.000393	0.000262	7.9e-05	0.000304	0.000373	0.000511	0.000191	0.000546	0.000114	9.4e-05	0.00095	0.000697
Comamonas testosteroni	Bacteria	23.6559	0.000441	2.7e-05	0.000204	0.000278	2.2e-05	2.3e-05	0.002324	0.000345	0.000256	0.000161	0.000727	6.1e-05	6.8e-05	7.1e-05	0.000307	0.000186	0.001881
Neisseria flavescens	Bacteria	23.6559	0.000441	0.000209	0.000253	0.002158	0.000536	8e-05	0.000146	1.5e-05	6.2e-05	0.000314	0.00057	1.2e-05	0.000393	0.000201	4.6e-05	0.001473	0.000461
Streptococcus acidominimus	Bacteria	31.1828	0.00044	0.000289	0.000309	0.000465	0.000858	2.6e-05	0.00025	0.000378	0.00092	0.000413	0.000468	0.000956	0.000296	0.000387	0.000367	0.000248	0.000413
Rheinheimera sp. F8	Bacteria	24.7312	0.00044	2.8e-05	0.00025	0.000206	0.0001	0.000466	0.001091	0.000441	0.000909	0.000213	0.000672	0.000776	0.000198	0.000638	0.000269	0.000705	0.000102
Flavobacterium sp. SLB02	Bacteria	29.0323	0.000439	9.6e-05	0.000189	0.002368	6.9e-05	0.000323	0.000106	3e-05	0.000254	0.000156	0.000728	9.7e-05	4.5e-05	0.000178	0.000179	0.00037	0.00171
Achromobacter spanius	Bacteria	46.2366	0.000439	0.000432	0.000277	0.000741	6.9e-05	0.000287	0.000637	0.000275	0.00075	0.000341	0.000538	0.00016	0.000797	0.000282	0.000452	0.000221	0.000682
Flavobacterium sp. xlx-214	Bacteria	35.4839	0.000438	0.000214	0.000385	0.000841	6.4e-05	0.000311	0.000302	0.00118	0.000262	0.000342	0.000537	5.8e-05	0.000373	0.000443	0.000893	0.000214	0.000626
Burkholderia pyrrocinia	Bacteria	35.4839	0.000438	0.001104	0.000108	8.5e-05	1.8e-05	0.000193	0.000102	0.001896	6.5e-05	0.00044	0.000436	0.0011	6.2e-05	0.000478	0.000226	0.000208	0.000601
Archangium violaceum	Bacteria	48.3871	0.000436	0.000542	0.000131	0.000654	0.00012	0.000296	0.000228	0.001038	0.000479	0.000477	0.000394	0.000342	0.000329	0.000352	0.000204	0.000859	0.000515
Ruminococcus albus	Bacteria	32.2581	0.000436	0.000798	0.000222	0.000306	0.000101	0.000207	0.000134	0.000124	0.001534	0.000338	0.000536	0.000287	0.000396	0.00072	0.000841	0.000104	0.000296
Streptococcus merionis	Bacteria	34.4086	0.000436	0.00021	9.9e-05	0.000749	0.001469	0.000178	0.000118	9.1e-05	0.000488	0.000176	0.000701	0.001302	0.000175	0.000241	0.000287	6.9e-05	0.000572
Acidovorax sp. YS12	Bacteria	27.957	0.000435	0.001139	0.000126	0.000108	1.5e-05	4.8e-05	8.1e-05	0.00188	0.000154	0.000458	0.000412	0.000795	8.9e-05	0.00011	4.9e-05	0.000624	0.000926
Burkholderia gladioli	Bacteria	36.5591	0.000435	0.001308	0.000164	0.000854	0.000213	7.4e-05	0.000115	0.000491	0.00022	0.000593	0.000273	0.000101	0.000262	0.000793	0.000113	0.00027	0.001094
Pseudodesulfovibrio tunisiensis	Bacteria	31.1828	0.000434	3.2e-05	0.00046	0.000479	3e-05	4.5e-05	0.001063	0.001263	0.000172	0.000323	0.000547	8e-05	0.000233	3.7e-05	0.001309	0.000388	0.000484
Mesorhizobium sp. J8	Bacteria	27.957	0.000433	0.000121	7.9e-05	0.000739	2.4e-05	0.001074	0.001121	0.000217	1.6e-05	0.000462	0.000404	1.1e-05	0.000787	2.9e-05	0.000905	0.000737	5.4e-05
Pseudoprevotella muciniphila	Bacteria	24.7312	0.000433	7e-06	6.1e-05	0.001606	6.7e-05	0.001267	4.2e-05	0.000124	0.000206	0.00041	0.000457	0.00013	9.6e-05	3.2e-05	0.000122	0.000951	0.0012
Burkholderia lata	Bacteria	34.4086	0.000432	0.000796	0.000344	0.001074	5.5e-05	0.000353	0.000534	2.8e-05	0.000223	0.000454	0.000409	0.000435	0.000311	0.000632	0.000921	9.4e-05	0.000223
Megasphaera stantonii	Bacteria	36.5591	0.000431	0.000101	0.000446	0.000187	0.000504	5.9e-05	0.00025	0.000568	0.001347	0.000532	0.000327	0.000442	0.000472	0.000328	0.000787	0.000265	0.000279
Gilliamella apicola	Bacteria	35.4839	0.000431	0.000157	5.8e-05	0.000607	0.000662	0.001426	6.8e-05	0.000148	0.000236	0.000561	0.000298	8.5e-05	0.000527	0.000739	0.001154	7.6e-05	2.2e-05
Olivibacter sp. SDN3	Bacteria	26.8817	0.00043	0.00026	0.000475	0.000393	0.000704	0.000372	0.000338	0.000918	3e-05	0.000526	0.000332	0.000635	0.001237	1.7e-05	0.000271	4.3e-05	0.00034
Prevotella sp. E2-28	Bacteria	26.8817	0.00043	1e-05	6.5e-05	0.00154	3.4e-05	0.000504	0.000412	0.000628	0.000204	0.000319	0.000543	0.000174	3.2e-05	3.1e-05	0.000405	0.000661	0.001212
Arachidicoccus ginsenosidivorans	Bacteria	25.8065	0.00043	0.000475	0.000131	3e-05	0.000189	0.000107	0.001838	0.00054	8.9e-05	0.000618	0.000238	0.001522	0.000249	0.000788	0.000123	0	1.2e-05
Streptomyces sp. 891-h	Bacteria	46.2366	0.000428	0.000875	0.000384	0.000639	0.000164	0.000269	0.000205	0.000783	0.000131	0.000438	0.000418	0.000365	0.000258	0.000377	0.000461	0.000932	0.000166
Yersinia rohdei	Bacteria	26.8817	0.000428	0.001438	0.000225	0.000206	6.1e-05	8.5e-05	0.000304	0.000564	0.000517	0.000581	0.000272	0.00025	0.000108	5.4e-05	0.000312	0.000723	0.001063
Streptomyces gardneri	Bacteria	24.7312	0.000428	0.000144	8.5e-05	0.000838	0.001125	0.00056	0.000128	2.6e-05	0.000424	0.000466	0.000388	4.5e-05	0.000252	8.6e-05	0.000535	0.000914	0.000668
Bradyrhizobium elkanii	Bacteria	11.828	0.000427	8.4e-05	0	2.1e-05	2.1e-05	8e-06	0.00074	0.002637	2e-05	0.000651	0.000198	0.000623	1.3e-05	3e-05	4.7e-05	0.001739	7.4e-05
Chitinophaga oryzae	Bacteria	35.4839	0.000427	0.000352	0.000145	0.000473	0.000229	0.000157	0.000452	0.001171	0.000453	0.000454	0.000399	0.000745	0.000453	0.000294	0.000335	0.00054	0.000198
Flavihumibacter sp. IMCC34838	Bacteria	40.8602	0.000427	0.000354	0.0003	0.00076	0.000233	0.000363	0.000834	0.000471	8.2e-05	0.000182	0.000677	7.9e-05	0.000663	0.000845	0.000261	0.000435	0.000308
Ezakiella massiliensis	Bacteria	29.0323	0.000427	0.000966	7e-05	0.000454	4.6e-05	0.000494	0.000694	0.000179	0.00043	0.000619	0.00023	0.000604	0.000737	0.000188	0.000771	1.5e-05	0.000226
Bifidobacterium thermophilum	Bacteria	33.3333	0.000424	0.00022	0.000587	0.00021	0.000617	0.000477	0.000151	0.000582	0.00059	0.000295	0.000556	0.000652	0.00067	0.000143	0.000613	5.8e-05	0.000388
Thiospirochaeta perfilievii	Bacteria	24.7312	0.000424	4.6e-05	1.4e-05	3.2e-05	0.000358	3e-06	0.00271	2.4e-05	0.000103	5.7e-05	0.000799	5.7e-05	0.002122	8.2e-05	2.6e-05	0.000183	9e-06
Lentibacillus sp. CBA3610	Bacteria	44.086	0.000424	0.000422	0.00055	0.000555	0.000205	0.000233	0.000281	2.2e-05	0.001109	0.000263	0.000588	8.7e-05	0.000228	0.000303	0.000233	0.001048	0.000608
Burkholderia contaminans	Bacteria	23.6559	0.000424	0.000847	0.000259	7e-06	2.7e-05	7.1e-05	0.000653	0.000799	0.000729	0.000549	0.000295	0.00056	0.000272	0.000785	0.000606	0.000364	7e-06
Staphylococcus simiae	Bacteria	24.7312	0.000423	3.3e-05	0.001609	9.3e-05	0.000276	3e-06	0.000262	3.9e-05	0.001239	0.000455	0.000391	0.000136	0.000272	0.000319	0.000139	8.4e-05	0.00156
Bradyrhizobium sp. CCBAU 51753	Bacteria	22.5806	0.00042	2e-05	5e-05	0.000277	6e-06	2.2e-05	0.000165	0.002926	4.5e-05	0.000687	0.000148	0.000144	3.2e-05	4.2e-05	3.5e-05	0.00217	3.3e-05
Massilia sp. LPB0304	Bacteria	26.8817	0.00042	2.2e-05	0.00013	0.0001	4e-06	0.000325	0.000677	0.001964	0.000218	0.00061	0.000226	0.00048	0.000111	7e-05	0.00019	0.001559	7.1e-05
Olsenella timonensis	Bacteria	33.3333	0.00042	0.000272	0.000549	0.000272	0.000506	0.000597	0.000224	0.000453	0.00051	0.000335	0.000507	0.000563	0.000676	0.000286	0.000488	0.000169	0.000329
Paenibacillus chitinolyticus	Bacteria	31.1828	0.000417	0.000181	0.000109	0.000118	8.5e-05	9.7e-05	0.001542	0.000353	0.000794	0.000597	0.000234	0.001379	0.000317	0.00029	0.000261	0.000265	3.4e-05
Schlegelella thermodepolymerans	Bacteria	27.957	0.000417	0.000122	0.002748	6.5e-05	2.9e-05	1.1e-05	0.000251	0.000186	0.00029	0.000695	0.000133	0.000218	0.000141	0.000212	0.000142	0.001615	0.000134
Streptococcus chenjunshii	Bacteria	29.0323	0.000414	5.4e-05	0.000258	0.000635	0.001018	1.7e-05	0.000391	0.000401	0.000512	0.000361	0.000468	0.000864	0.000227	0.000235	0.000392	0	0.000775
Chloroflexus aggregans	Bacteria	33.3333	0.000414	9.6e-05	0.000417	0.001677	1.1e-05	0.00019	0.000742	7.3e-05	7.7e-05	0.000429	0.000398	0.000579	0.000525	0.000119	0.000449	0.000382	0.000402
Campylobacter pinnipediorum	Bacteria	33.3333	0.000413	1.1e-05	0.00015	0.000934	0.000502	0.000147	0.000207	0.001308	7.7e-05	0.000272	0.000558	1e-05	5.5e-05	0.000837	0.000866	0.000655	8.5e-05
Bacillus atrophaeus	Bacteria	23.6559	0.000413	0.000215	0.002087	1.2e-05	0.00047	7.7e-05	0.000162	9.1e-05	0.000442	0.000609	0.000213	0.000493	0.000215	0.000199	0.000168	5.2e-05	0.001328
Virgibacillus halodenitrificans	Bacteria	41.9355	0.000413	0.000581	0.000286	0.000255	8e-05	0.00064	0.000342	0.000417	0.000681	0.000452	0.000372	0.000154	0.000218	0.000293	0.000555	0.000714	0.000511
Radiobacillus sp. 80	Bacteria	39.7849	0.00041	7.1e-05	0.000342	0.000755	0.00066	0.000736	0.000279	4.2e-05	0.00035	0.000196	0.000627	0.000435	0.000473	0.000594	0.000359	0.000416	0.000205
Pseudomonas sp. TMW 2.1634	Bacteria	13.9785	0.000409	9e-06	0.000354	0.00061	0.000792	0.000148	0.000623	0.000667	8.3e-05	0.0003	0.000521	0.000494	0.000524	0.001067	0.000172	0	0.000286
Pyxidicoccus sp. SCPEA002	Bacteria	35.4839	0.000409	0.000132	0.000244	0.000619	0.000236	2.5e-05	0.000989	0.000897	0.00014	0.000411	0.000407	9.3e-05	0.00027	0.000164	0.00015	0.000945	0.000778
Hahella sp. KA22	Bacteria	32.2581	0.000408	0.000536	0.0007	0.000338	2.6e-05	0.000539	0.000674	0.000232	0.000254	0.000231	0.000589	0.000293	0.000282	5.6e-05	0.000468	0.001011	0.000286
Bordetella petrii	Bacteria	30.1075	0.000407	0.000205	4.4e-05	0.001811	0.000133	0.000615	0.000183	0.000156	2.9e-05	0.000463	0.00035	0.000102	0.000102	0.00081	0.000127	0.000572	0.000762
Paenibacillus sp. H1-7	Bacteria	37.6344	0.000406	0.000378	0.000698	0.00013	8.8e-05	0.000117	0.000372	0.00077	0.000778	0.000386	0.000428	0.000349	0.000594	0.000429	0.000479	0.00048	0.000107
Clostridium manihotivorum	Bacteria	39.7849	0.000406	0.000608	0.000348	0.000167	0.000143	0.000104	0.000514	0.000517	0.00085	0.000409	0.000403	0.000379	0.000469	0.000527	0.000559	0.000221	0.000297
Tenuifilum thalassicum	Bacteria	45.1613	0.000406	0.000289	0.000507	0.000354	0.000382	0.000688	0.000454	0.000376	0.000212	0.000248	0.000568	0.000158	0.000312	0.000549	0.000541	0.000499	0.000379
Aerococcus sanguinicola	Bacteria	38.7097	0.000405	0.000641	4.3e-05	0.000571	0.000391	0.000727	0.00045	0.000236	0.000106	0.000304	0.000508	0.000221	0.000286	0.000274	0.000742	0.000711	0.000168
Leptotrichia sp. oral taxon 212	Bacteria	40.8602	0.000405	0.000599	0.000197	0.00064	0.000371	0.000315	0.000487	0.000337	0.000254	0.000337	0.000474	0.000264	0.000533	0.000288	0.000683	0.000117	0.00052
Streptomyces liliifuscus	Bacteria	37.6344	0.000405	0.000762	0.000317	0.001025	0.000127	0.000161	0.000205	0.000479	0.000152	0.000612	0.000192	0.000185	0.000292	0.001253	0.000233	0.000148	0.000408
Massilia sp. NP310	Bacteria	21.5054	0.000404	6e-06	6.7e-05	0.000636	5e-06	0.000119	0.00161	0.000652	0.000105	0.000246	0.000567	0.000959	0.000838	4.9e-05	7e-05	0.000461	4e-05
Megasphaera elsdenii	Bacteria	39.7849	0.000404	0.000306	0.000205	0.000295	0.000175	0.000212	0.000488	0.00033	0.001184	0.000393	0.000415	0.000268	0.00056	0.000501	0.000809	0.000152	0.000139
Jejubacter calystegiae	Bacteria	26.8817	0.000404	1.4e-05	0.001223	0.00021	0.00052	7.1e-05	0.000616	0.000414	0.000298	7e-05	0.000744	0.000171	0.000472	0.000934	5.1e-05	0.000722	0.000122
Collimonas arenae	Bacteria	35.4839	0.000403	0.000509	7.2e-05	0.000857	0.000267	6.2e-05	0.001019	9.6e-05	0.000263	0.00042	0.000386	6.1e-05	0.000212	0.000454	0.000143	8e-05	0.001455
Sphingosinicella microcystinivorans	Bacteria	25.8065	0.000401	0.000296	0.000142	0.000427	0.000207	0.000129	0.000341	0.001064	0.000612	0.000541	0.000257	0.000235	0.00021	0.000332	0.000203	0.00094	0.000465
Streptomyces albus	Bacteria	34.4086	0.0004	6.1e-05	0.000118	9.9e-05	0.000376	0.00027	0.000214	0.001714	0.000413	0.000459	0.00034	0.000367	0.00023	5.6e-05	0.000274	0.001363	6.7e-05
Sphingomonas sp. AAP5	Bacteria	24.7312	0.0004	7e-06	0.000222	0.000146	0.000122	0.000113	0.000694	0.001083	0.000842	0.00053	0.000268	0.000536	0.00031	4.8e-05	0.000684	0.000634	0.000152
Nocardia asteroides	Bacteria	36.5591	0.0004	0.000301	0.000168	0.000525	3.7e-05	0.000146	0.000204	0.001657	0.000228	0.00062	0.000176	0.000175	0.000135	0.000291	0.000177	0.001156	0.000439
Bradyrhizobium sp. ORS 285	Bacteria	19.3548	0.000399	0.000332	5.5e-05	2.5e-05	1.9e-05	7.9e-05	8.4e-05	0.002636	9.2e-05	0.000493	0.000303	0.000158	0.00024	1.3e-05	0.000585	0.001315	2e-05
Marinobacter similis	Bacteria	30.1075	0.000399	0.000572	6.2e-05	0.000911	0.000508	0.000297	0.000222	0.000513	6.1e-05	0.000179	0.000623	0.000199	5e-05	0.000598	0.000723	0.000645	0.000191
Clostridium cellulovorans	Bacteria	38.7097	0.000399	0.001345	0.00039	0.000452	8.7e-05	5.5e-05	0.000124	8.7e-05	0.000623	0.000538	0.000256	0.000225	0.000274	0.000308	0.000385	7.2e-05	0.001107
Streptomyces hundungensis	Bacteria	43.0108	0.000399	0.00104	0.000128	0.000506	0.000634	0.000169	0.00029	0.000129	0.000226	0.000266	0.000534	0.000188	0.00026	0.00055	0.000391	0.000424	0.000584
Sphingomonas aliaeris	Bacteria	23.6559	0.000398	7e-06	0.000187	9.3e-05	5e-05	6.2e-05	0.000985	0.001412	0.000442	0.000517	0.000277	0.000723	0.00027	2.1e-05	0.000351	0.000902	9.7e-05
Massilia sp. WG5	Bacteria	25.8065	0.000398	2.6e-05	0.000237	0.000257	8e-06	3.1e-05	0.001241	0.001121	0.000299	0.000301	0.000497	0.001005	0.000387	0.000163	0.000162	0.000572	0.000109
Acetivibrio clariflavus	Bacteria	38.7097	0.000398	0.000365	0.000416	0.000398	0.000186	0.000136	0.000205	0.000801	0.000712	0.000453	0.000341	0.00027	0.00034	0.000439	0.000521	0.000491	0.000323
Microbacterium sp. SSW1-51	Bacteria	25.8065	0.000398	2.2e-05	0.00046	0.000137	1.7e-05	7.8e-05	0.000982	0.00083	0.000703	0.000469	0.000325	0.000771	0.000447	4.3e-05	0.000566	0.000322	0.000216
Ideonella dechloratans	Bacteria	35.4839	0.000398	4e-05	0.000229	0.000301	1.6e-05	0.000208	0.001286	0.000978	0.000142	0.000287	0.00051	0.00022	0.000372	8.2e-05	0.000168	0.000695	0.000797
Enterobacter sp. JUb54	Bacteria	25.8065	0.000397	7e-06	0.001245	0.000248	0.000589	0.000272	0.000664	3.3e-05	0.000226	0.000135	0.000663	0.000146	0.0003	0.001007	4.5e-05	0.000825	0.000118
Bifidobacterium saguini	Bacteria	27.957	0.000396	0.000748	0.00027	0.000145	7.6e-05	0.000342	0.000163	0.000684	0.000747	0.000391	0.000401	0.000361	0.00104	0.000248	0.000484	8.5e-05	0.000139
Pedobacter roseus	Bacteria	34.4086	0.000396	0.000403	0	0.00194	8.5e-05	0.000133	0.000386	2.3e-05	0.000104	0.000319	0.000475	0.000489	0.000107	0.0002	0.000136	0.000245	0.001182
Vaginimicrobium propionicum	Bacteria	25.8065	0.000396	0.001012	1.3e-05	0.000232	3.8e-05	0.000233	0.001266	0.000154	0.000138	0.000463	0.000328	0.000952	0.000928	2.3e-05	0.000371	0	9.1e-05
Bacteriovorax stolpii	Bacteria	24.7312	0.000396	2e-05	0.000358	5.9e-05	2.3e-05	0.002491	1.9e-05	3.8e-05	0.000123	0.000682	0.000103	2.7e-05	0.000286	6e-06	0.001848	3.1e-05	0.000104
Paenibacillus durus	Bacteria	37.6344	0.000396	0.000245	0.00016	0.000591	0.000139	0.0002	0.001051	0.000108	0.00061	0.000416	0.000375	0.000822	0.000292	0.00035	0.000207	0.000659	6.6e-05
Corynebacterium nuruki	Bacteria	36.5591	0.000396	0.001036	0.000224	0.000386	0.001098	6e-05	8.3e-05	0.000158	7.3e-05	0.000614	0.000173	6e-05	0.000142	4.9e-05	8.4e-05	0.000828	0.001147
Leptotrichia wadei	Bacteria	35.4839	0.000394	0.000713	0.000159	0.000391	2e-06	0.000163	0.000473	0.000679	0.000561	0.000488	0.000299	0.000612	0.000292	0.000129	0.000234	0.000711	0.000369
Streptomyces huasconensis	Bacteria	26.8817	0.000393	0.00031	0.000244	9.3e-05	0.00028	0.000366	0.000963	0.000799	9.7e-05	0.000328	0.000459	8.6e-05	0.000633	0.000246	0.000842	0.000483	3e-05
Xanthobacter dioxanivorans	Bacteria	30.1075	0.000393	0.00018	2.8e-05	0.00023	6e-06	5.3e-05	0.001464	0.001043	0.00013	0.000319	0.000468	6.3e-05	9.6e-05	0.000181	0.000115	0.000703	0.001151
Halopseudomonas aestusnigri	Bacteria	24.7312	0.000391	0.000116	0.000605	0.000168	0.000141	0.000452	0.000182	0.000397	0.001105	0.000295	0.000489	0.000257	0.000975	0.000516	0.000338	0	0.000269
Gimesia alba	Bacteria	39.7849	0.000391	0.001092	0.00031	0.000343	0.000441	0.000134	0.000573	8e-05	0.000118	0.000436	0.000346	0.000499	0.000337	0.000455	0.000543	0.000334	0.000194
Brevibacillus sp. HD3.3A	Bacteria	31.1828	0.00039	0.000467	0.000356	0.000376	5.8e-05	3e-05	0.000541	0.000213	0.001062	0.00051	0.000268	0.00038	0.000519	0.000306	0.000627	0.000127	0.000373
Alloactinosynnema sp. L-07	Bacteria	30.1075	0.000389	0.000105	0.000305	0.001095	0.000467	0.00029	5.5e-05	0.000663	0.000142	0.00037	0.000409	5.1e-05	0.000207	0.000234	0.000327	0.001227	0.000248
Mesorhizobium sp. Pch-S	Bacteria	33.3333	0.000389	3.1e-05	0.00015	0.000381	4.7e-05	6.2e-05	0.000845	0.001238	0.000389	0.000428	0.00035	0.000617	0.00039	0.000167	0.000276	0.000817	5.5e-05
Lactobacillus iners	Bacteria	33.3333	0.000388	0.000174	3.2e-05	1e-05	5e-05	0.000209	0.000624	0.000709	0.00126	0.000587	0.000184	0.000544	0.000181	7.3e-05	0.001068	0.000145	0.000286
Weizmannia coagulans	Bacteria	31.1828	0.000388	0.000119	0.000246	0.000103	0.000335	3.3e-05	0.000577	0.000654	0.00103	0.000461	0.000312	0.000661	0.000412	0.000266	0.0004	0.000393	0.000195
Cellulosilyticum lentocellum	Bacteria	29.0323	0.000387	0.000429	0.000287	5.5e-05	0.000388	5.2e-05	4.3e-05	0.000207	0.001604	0.000432	0.000341	0.000353	0.000369	0.00091	0.000249	0.00024	0.000265
Niastella koreensis	Bacteria	32.2581	0.000387	0.000208	1.3e-05	0.002371	2.9e-05	0.000155	8.2e-05	4.6e-05	0.000101	0.000612	0.000157	5.7e-05	0.00013	0.001535	0.000463	0	0.000258
Clostridium argentinense	Bacteria	34.4086	0.000386	0.000545	0.000159	0.001041	4.4e-05	0.000117	0.000183	0.000268	0.000685	0.000452	0.00032	0.0003	0.000297	0.000409	0.000411	0.000395	0.000503
Klebsiella huaxiensis	Bacteria	31.1828	0.000386	8.4e-05	0.001249	0.000171	0.000641	0.000238	0.000435	0.000152	0.00024	0.000146	0.000631	0.000229	0.000475	0.00093	5.2e-05	0.000608	7.7e-05
Kosakonia radicincitans	Bacteria	19.3548	0.000383	1.5e-05	0.001346	0.000158	0.000519	2.5e-05	0.000738	0.000153	0.000256	0.000108	0.000665	0.000167	0.000185	0.00105	7.7e-05	0.00078	0.000112
Streptococcus uberis	Bacteria	32.2581	0.000383	7.8e-05	0.000177	0.000757	0.001079	0.000118	0.000196	0.000194	0.000417	0.000254	0.000515	0.000995	0.000199	0.000193	0.000227	4.2e-05	0.000658
Croceicoccus marinus	Bacteria	35.4839	0.000383	0.000231	0.000162	0.000504	0.000323	2.8e-05	0.000159	0.001673	5.3e-05	0.000423	0.000342	9.1e-05	0.000251	9.1e-05	0.000514	0.001278	1.7e-05
Kosakonia sacchari	Bacteria	25.8065	0.000383	1.8e-05	0.001133	0.000221	0.000491	0.000421	0.00061	5.5e-05	0.000211	0.000154	0.000616	0.00011	0.000181	0.000926	2.9e-05	0.000963	0.000138
Microbacterium foliorum	Bacteria	30.1075	0.000381	6e-05	0.000242	0.000673	0.000358	0.000112	0.000256	0.000983	0.000394	0.000533	0.000227	0.000235	0.000217	9.8e-05	0.000286	0.000783	0.000626
Clostridium intestinale	Bacteria	33.3333	0.000381	0.000237	0.000151	0.001629	8.5e-05	0.0002	0.000138	0.000119	0.000426	0.000295	0.000468	0.000339	0.000184	0.000107	0.001072	1.8e-05	0.000527
Pandoraea vervacti	Bacteria	34.4086	0.00038	0.000254	0.000114	0.001585	2e-06	0.000322	8.1e-05	9.2e-05	0.000524	0.000529	0.000228	4.7e-05	0.00014	0.001546	0.000293	0.000277	0.000104
Rufibacter radiotolerans	Bacteria	27.957	0.000379	0.000835	0.000624	0.000916	0.000198	0.000215	3.4e-05	0.000102	0.000125	0.000273	0.000487	0.000153	0.000203	6.3e-05	0.00012	0.000376	0.001305
Leuconostoc sp. C2	Bacteria	10.7527	0.000379	0.000473	0.000191	5.6e-05	0	0.000932	0	0	0.001316	0.000532	0.000222	0.000552	0.00042	0.000478	0.000354	0	0.000491
Chitinophaga sp. XS-30	Bacteria	27.957	0.000379	0.000208	0.000206	0.000699	2.5e-05	0.00029	0.000689	0.000795	0.000123	0.000343	0.000415	0.000125	0.00076	0.000315	0.000139	0.00075	0.000158
Nonomuraea gerenzanensis	Bacteria	27.957	0.000378	0.000167	5.4e-05	1.6e-05	0.001185	7.1e-05	5.1e-05	0.001093	0.000393	0.00031	0.000448	7.8e-05	0.001083	0.000204	0.00015	0.000659	5.3e-05
Bacillus infantis	Bacteria	36.5591	0.000378	6.3e-05	0.000129	9.6e-05	0.001415	0.000303	0.000443	0.000112	0.000397	0.000234	0.000524	0.000137	0.001035	0.000118	0.000416	0.000207	0.000307
Caldicellulosiruptor obsidiansis	Bacteria	22.5806	0.000377	6.4e-05	7e-06	5.3e-05	0.002057	3e-06	0.000524	0.000145	8.4e-05	0.000379	0.000376	0.000436	5.4e-05	0.000106	1.5e-05	0.001615	6e-06
Haliscomenobacter hydrossis	Bacteria	32.2581	0.000376	0.000291	0.00012	0.000211	0.000498	0.000248	0.001163	0.00041	3e-05	0.00023	0.000526	6.9e-05	0.000484	0.000375	0.00017	0.000314	0.000827
Mycolicibacter minnesotensis	Bacteria	38.7097	0.000376	0.000381	0.000147	0.000565	0.000974	0.000131	0.000364	0.00035	5.5e-05	0.000537	0.000212	0.000203	0.000205	0.000773	0.000192	0.000854	6.8e-05
Schaalia sp. 19OD2882	Bacteria	30.1075	0.000375	0.000652	0.000108	7.8e-05	4e-06	0.000401	6.7e-05	0.000611	0.001057	0.000534	0.000214	0.000349	0.000864	0.000188	0.000521	0	0.000304
Marinobacter sp. CA1	Bacteria	26.8817	0.000375	0.000542	5.8e-05	9.2e-05	0.000783	5e-06	0.000943	4.2e-05	0.000454	0.000176	0.000578	0.000407	0.000764	0.000139	0.000108	0.000747	5.6e-05
Clostridium fermenticellae	Bacteria	44.086	0.000374	0.000778	0.000217	0.000168	0.000281	0.000109	0.00035	0.000457	0.000612	0.000471	0.000275	0.000228	0.000245	0.000606	0.000522	0.000461	0.000202
Flavisolibacter ginsenosidimutans	Bacteria	36.5591	0.000374	0.000778	0.000127	0.00028	0.000476	8e-05	0.000238	0.000917	0.0001	0.000376	0.000372	0.000251	0.000325	0.000275	8.5e-05	0.001184	0.000104
Streptococcus halotolerans	Bacteria	30.1075	0.000373	0.000118	7.7e-05	0.000289	0.001465	4.4e-05	0.000325	7.9e-05	0.000514	0.000216	0.000534	0.001245	0.000187	0.000205	0.000219	2.4e-05	0.000393
Clostridium carboxidivorans	Bacteria	35.4839	0.000373	0.000108	0.000457	0.000375	0.000246	0.000156	0.000946	0.000379	0.000332	0.000168	0.000583	0.000269	0.000365	0.000227	0.000327	0.000328	0.000698
Selenomonas timonae	Bacteria	27.957	0.000373	0.000258	0.002403	4.2e-05	3.1e-05	1.5e-05	3.6e-05	0.00017	0.000351	0.000604	0.000137	0.001617	0.000239	0.000122	0.000174	8e-05	5.4e-05
Pectobacterium parmentieri	Bacteria	35.4839	0.000373	0.00081	0.000213	0.000257	0.000335	0.000446	0.000442	0.000232	0.000213	0.000241	0.000508	8.9e-05	0.000204	0.000432	0.000286	0.000635	0.000582
Larkinella sp. IE-0392	Bacteria	35.4839	0.000372	0.000118	3.1e-05	0.000131	0.000758	7.6e-05	0.000509	0.000252	0.001036	0.000187	0.000562	0.000161	0.000105	0.00011	0.000347	0.001367	9.7e-05
Denitratisoma oestradiolicum	Bacteria	31.1828	0.000372	0.000436	8.6e-05	0.000128	0.000548	0.000888	0.000298	0.000444	0.000104	0.000169	0.000579	0.000361	0.00011	0.000652	0.000542	0.000541	5.8e-05
Mageeibacillus indolicus	Bacteria	35.4839	0.00037	0.000457	0.000176	0.000373	0.000144	5.3e-05	0.000267	0.000299	0.001154	0.000466	0.000272	0.000322	0.000387	0.000383	0.000893	0.000139	9.6e-05
Desulfosporosinus orientis	Bacteria	34.4086	0.00037	0.00025	0.000155	0.00096	0.000235	0.000116	0.0001	0.00011	0.000977	0.000394	0.000346	0.000157	0.000511	0.001169	0.000349	3.5e-05	8.6e-05
Leptospira interrogans	Bacteria	26.8817	0.00037	3.7e-05	0.000301	0.000124	0.000128	0.001516	2.2e-05	4.3e-05	0.000748	0.000232	0.000511	0.000111	0.000177	0.000624	0.001262	4e-06	5.6e-05
Vibrio vulnificus	Bacteria	45.1613	0.000368	0.000115	0.000615	0.000594	0.000244	0.000481	0.000249	0.000514	0.000186	0.00027	0.000469	0.000161	0.000338	0.000355	0.000228	0.000709	0.000405
Fusobacterium necrophorum	Bacteria	29.0323	0.000368	0.000383	0.000119	0.000196	0.000195	0.000165	0.000119	0.001157	0.000636	0.000547	0.000186	0.000289	0.001037	0.000297	0.000481	0	9.2e-05
Mycobacterium rufum	Bacteria	21.5054	0.000367	2.1e-05	2.9e-05	6e-06	1e-05	6e-06	0.000177	0.001579	0.001154	0.000527	0.000204	4.4e-05	3.7e-05	0.000597	2.7e-05	0.00116	0.000347
Corynebacterium glucuronolyticum	Bacteria	26.8817	0.000367	0.000637	7e-05	0.000496	5e-06	0.000269	0.000594	0.00079	6.3e-05	0.000481	0.000251	0.000697	0.000622	2.1e-05	0.000784	1.9e-05	3.7e-05
Micromonospora purpureochromogenes	Bacteria	32.2581	0.000367	0.000329	0.000287	0.000905	0.000251	0.000201	0.000428	0.000482	5e-05	0.000449	0.000284	0.000337	0.000318	0.000462	0.000133	0.000295	0.000668
Kluyvera intermedia	Bacteria	31.1828	0.000366	0.000127	0.001071	0.000173	0.000491	0.00015	0.000683	0.000141	0.000193	0.000162	0.000575	0.000154	0.000173	0.001041	5.3e-05	0.000705	0.000142
Acidovorax sp. 1608163	Bacteria	26.8817	0.000366	1e-05	0.001703	1.1e-05	4.9e-05	9e-06	0.001148	5.3e-05	0.000143	0.000401	0.00033	6.7e-05	4.2e-05	6.7e-05	9.6e-05	0.001038	0.00083
Acetobacter aceti	Bacteria	35.4839	0.000365	2.7e-05	0.000117	0.00045	5.2e-05	0.000576	0.00014	0.00104	0.000536	0.000355	0.000376	0.000796	0.000231	0.000521	0.000116	0.000546	2.9e-05
Phytobacter ursingii	Bacteria	37.6344	0.000365	0.000177	0.001032	0.000433	0.000413	0.000118	0.000493	0.000114	0.000229	0.0001	0.000636	0.000166	0.00029	0.00087	0.000176	0.000609	0.00013
Macrococcus canis	Bacteria	34.4086	0.000364	2.2e-05	0.000201	0.001037	9.8e-05	0.000114	0.001289	4e-05	5.8e-05	0.000126	0.000608	0.000134	0.000205	0.000363	0.000272	0.000392	0.000806
Enterobacter kobei	Bacteria	18.2796	0.000364	0	0.001235	7.4e-05	0.000471	0.00042	0.000496	0.000135	0.000204	0.000171	0.00056	0.000182	0.000156	0.000798	0.000146	0.000846	9.6e-05
Enterococcus thailandicus	Bacteria	25.8065	0.000363	4e-05	9.5e-05	0.000314	0.001024	0.000117	1e-05	9e-05	0.00115	0.000309	0.000419	0.000906	0.000161	0.000624	2.4e-05	0.000255	0.000276
Microterricola viridarii	Bacteria	41.9355	0.000363	0.000455	0.000341	0.000372	0.000237	0.000219	5.6e-05	0.000593	0.000648	0.000359	0.000367	0.00013	0.000381	0.000321	0.000642	0.00056	0.000125
Allobaculum mucolyticum	Bacteria	31.1828	0.000363	0.000175	7.6e-05	0.000303	0.00128	0.000154	0.000119	9e-05	0.000635	0.000183	0.000547	0.001185	0.000231	0.000304	0.000141	0.000147	0.000214
Rhizobium sp. BG4	Bacteria	23.6559	0.000362	1.3e-05	5.1e-05	0.001769	0.000218	2e-06	3.4e-05	0.000649	0.000132	0.000147	0.000582	4.2e-05	0.000236	3e-05	0.001436	0	0.000367
Bradyrhizobium paxllaeri	Bacteria	17.2043	0.000362	5e-06	0.000132	1.9e-05	6.6e-05	9e-06	0.000145	0.002643	2.4e-05	0.000651	6.6e-05	0.000104	3.8e-05	1.8e-05	8.2e-05	0.001816	5.2e-05
Lacimicrobium alkaliphilum	Bacteria	29.0323	0.000361	0.000233	6.4e-05	0.000472	9e-06	8.1e-05	0.001403	3.9e-05	0.000509	0.000273	0.00045	0.000225	0.000132	0.000268	0.000985	4.8e-05	0.000486
Roseomonas marmotae	Bacteria	38.7097	0.000361	0.000274	0.000253	0.000103	0.000829	0.00014	0.000494	0.000176	0.000584	0.00055	0.000168	0.000595	0.000164	3.4e-05	0.000159	0.000877	0.000309
Latilactobacillus curvatus	Bacteria	31.1828	0.00036	0.000364	0.000129	0.000142	0.000266	0.000798	0.000102	0.000297	0.000741	0.000287	0.000435	0.000365	0.000824	0.000343	0.000307	0	0.000321
Allobaculum sp. Allo2	Bacteria	34.4086	0.00036	0.0004	0.000137	0.000531	0.000836	0.000179	7e-06	0.000124	0.000604	0.00025	0.000472	0.000671	0.000367	0.000264	0.000489	0.000175	0.000199
Fimbriimonas ginsengisoli	Bacteria	39.7849	0.000357	0.001038	0.000418	0.000383	0.000438	6.4e-05	0.000212	5.6e-05	0.000231	0.000329	0.000386	0.000317	0.000332	0.000856	0.000334	7e-05	0.000294
Caballeronia insecticola	Bacteria	17.2043	0.000357	9e-06	0.000106	0	3e-06	2e-05	1.6e-05	0.002804	6.1e-05	0.00068	2.7e-05	5e-06	3.6e-05	4.7e-05	8.5e-05	0.001905	3e-06
Streptococcus sp. 1643	Bacteria	31.1828	0.000356	0.000283	0.000277	9.8e-05	7.4e-05	0.000151	0.000578	0.000685	0.000717	0.000518	0.000191	0.000325	0.000492	0.000187	0.000671	4.7e-05	0.000392
Bacillus pumilus	Bacteria	35.4839	0.000355	0.000318	0.000198	7.1e-05	0.00029	0.000111	0.001185	8.4e-05	0.000536	0.000469	0.000239	0.001053	0.000288	0.000347	0.000326	0.000105	5.7e-05
Polynucleobacter sp. MWH-CaK5	Bacteria	17.2043	0.000355	0	0.000375	1.8e-05	6.4e-05	0.000305	0.001988	6e-06	5.6e-05	4.4e-05	0.000672	0.000112	0.000216	6.6e-05	0.001592	9.1e-05	0
Nocardioides yefusunii	Bacteria	29.0323	0.000355	0.000319	7e-05	0.000739	3e-06	0.000241	0.000948	0.000289	0.000174	0.000604	9.9e-05	0.000966	0.000201	3.2e-05	0.000114	0.000267	0.000546
Actinomarinicola tropica	Bacteria	20.4301	0.000354	0.000102	0	0	7e-06	0.0001	4e-06	0.002715	4.2e-05	0.000681	2e-05	1.9e-05	3.2e-05	0.000111	1.5e-05	0.001837	5.9e-05
Paenibacillus konkukensis	Bacteria	35.4839	0.000353	0.00014	0.000123	5.7e-05	2.8e-05	0.00014	0.000661	0.000944	0.000745	0.000429	0.000276	0.000479	0.000249	0.000165	0.000332	0.000685	0.000196
Spirosoma sp. CJU-R4	Bacteria	34.4086	0.000352	0.000678	0	0.000743	0.000258	0.000238	0.000535	0.000171	0.000122	0.000335	0.00037	0.000115	0.000634	0.000394	9.9e-05	0.000814	4.8e-05
Caproicibacter fermentans	Bacteria	31.1828	0.000351	0.000415	0.000502	0.000317	0.000126	7.4e-05	0.00013	0.000179	0.001075	0.000351	0.000351	0.000415	0.000471	0.000474	0.000561	5e-05	0.000155
Achromobacter insolitus	Bacteria	32.2581	0.000351	0.000491	0.000192	0.001209	0.000287	0.0001	0.000315	0.000118	5e-05	0.00049	0.000209	0.000235	0.000252	0.001296	0.000242	9.2e-05	0.0001
Tolypothrix tenuis	Bacteria	32.2581	0.000351	0.000725	0.000354	7.4e-05	0.0003	0.000161	0.000869	0.000106	0.000199	0.000474	0.000225	6.9e-05	0.000454	0.00127	0.000221	0.000169	2.1e-05
Lacticaseibacillus casei	Bacteria	27.957	0.000351	9.1e-05	0.000161	4.4e-05	4.3e-05	8.4e-05	0.001429	0.000639	0.000306	0.000298	0.000404	0.000124	0.0003	0.000142	0.001001	0.000341	0.000155
Microlunatus sagamiharensis	Bacteria	22.5806	0.00035	0.00058	0.000195	1.1e-05	0.000748	1.7e-05	1e-05	0.00101	0.000257	0.000498	0.000199	3.6e-05	0.000746	0.000147	0.000653	3.8e-05	0.000435
Theileria parva	Bacteria	36.5591	0.000349	0.000357	0	0.000279	0.00072	0.000145	0.000287	0.000273	0.000664	0.000149	0.000553	3.4e-05	0.000618	0.000357	0.000186	0.00073	0.000149
Marinobacter salsuginis	Bacteria	27.957	0.000347	0.000209	0.0005	0.000804	0.000256	0.000476	0.000114	0.000397	5e-05	0.000231	0.000466	8.9e-05	0.000716	0.000488	0.000407	0.000363	2.1e-05
Aquiflexum balticum	Bacteria	39.7849	0.000347	0.000735	0.000202	0.000748	0.000244	0.000279	0.000328	0.000146	5e-05	0.000286	0.000409	0.000149	0.000157	0.000624	0.000269	0.00054	0.000363
Pseudoalteromonas rubra	Bacteria	31.1828	0.000346	0.000455	7.4e-05	0.000189	0.000524	2.6e-05	0.000229	0.001145	0.000151	0.000333	0.00036	0.000562	0.00039	8.8e-05	0.000203	0.000798	1.8e-05
Bradyrhizobium sp. CCBAU 53421	Bacteria	25.8065	0.000345	0.000771	6e-05	4.8e-05	9e-06	2.5e-05	0.000206	0.001538	0.000159	0.000491	0.000196	0.00029	3.1e-05	0.000705	0.00015	0.000835	0.000103
Mycobacterium sp. JS623	Bacteria	26.8817	0.000345	0.000275	5.7e-05	8.4e-05	0.001376	3.7e-05	0.000118	0.000739	5.4e-05	0.000632	5.1e-05	6e-05	0.000107	0.000235	7.3e-05	0.001522	3.9e-05
Morganella morganii	Bacteria	39.7849	0.000344	0.000116	0.000432	0.000107	0.000132	0.000171	0.000466	0.000836	0.000552	0.000373	0.000315	0.000355	0.000251	0.000346	0.000231	0.000618	0.000266
Staphylococcus cohnii	Bacteria	24.7312	0.000343	6.6e-05	0.000285	0	7e-06	2e-05	0.001547	0.000302	0.000507	0.000249	0.000439	5e-05	7.2e-05	0.000126	0.000261	0.000216	0.001289
Fluviispira sanaruensis	Bacteria	37.6344	0.000343	6.5e-05	0.000138	0.000528	1e-05	0.000388	0.001155	1.8e-05	0.000381	0.000332	0.000355	3.9e-05	0.000357	0.000179	0.000341	0.000981	0.000121
Weissella confusa	Bacteria	29.0323	0.000342	0.000272	1.7e-05	0.000202	8.3e-05	0.000216	3.5e-05	0.001108	0.000815	0.000493	0.000189	0.000192	0.000431	0.0001	0.000391	0.000733	0.000167
Nocardia farcinica	Bacteria	26.8817	0.000341	4.5e-05	6.3e-05	4.4e-05	2.9e-05	4.8e-05	2.6e-05	0.002535	7.7e-05	0.000611	6.6e-05	4.9e-05	0.000118	2.2e-05	4.8e-05	0.001696	5.6e-05
Streptomyces glaucescens	Bacteria	19.3548	0.000341	3.3e-05	0.002368	2.4e-05	4e-05	3.6e-05	4e-06	0.000455	0.000116	0.00063	4.6e-05	0.001611	8.5e-05	9e-06	5.6e-05	0.000269	5.5e-05
Dermabacter jinjuensis	Bacteria	23.6559	0.00034	0.000156	9.7e-05	8e-06	4e-06	7.5e-05	0.000165	0.002042	0.000277	0.00059	8.6e-05	0.000107	0.001522	0.000101	8.4e-05	0	0.000183
Providencia sp. R33	Bacteria	29.0323	0.00034	0.000427	5.1e-05	7e-06	0.000419	7.4e-05	0.001208	0.000321	0.000163	0.00024	0.000442	3.5e-05	0.000857	0.000403	8e-05	0.000582	7.2e-05
Gordonia sp. PDNC005	Bacteria	26.8817	0.00034	0.000276	3.6e-05	0.0001	0.001629	0.000239	0.000167	0.000121	8.2e-05	0.000135	0.000549	0.000219	0.001299	9.8e-05	0.00019	0.000102	9.2e-05
Streptomyces griseorubiginosus	Bacteria	38.7097	0.00034	0.000274	7.8e-05	0.000275	0.001067	9e-05	0.000223	0.000561	0.000125	0.000228	0.000454	9.6e-05	0.000705	0.000402	0.000158	0.000617	5.3e-05
Pseudomonas oleovorans	Bacteria	13.9785	0.00034	2.5e-05	0.00011	5.3e-05	5e-06	0.000225	0.000214	0.001304	0.000823	0.000329	0.00035	0.000189	8.5e-05	0.000707	6.9e-05	0.001025	0
Nocardia brasiliensis	Bacteria	34.4086	0.000339	0.000147	0.000152	9.9e-05	7.9e-05	0.000114	0.000138	0.001603	0.000453	0.000528	0.000146	0.000137	0.000248	0.000168	0.000258	0.000917	0.000273
Ornithinimicrobium flavum	Bacteria	26.8817	0.000338	0.000377	6.3e-05	0.000246	0.00068	2.3e-05	0.001115	6.2e-05	7e-05	0.000238	0.00044	0.000355	0.000446	0.000227	9.8e-05	0.000296	0.000595
Gilliamella sp. ESL0405	Bacteria	26.8817	0.000338	0.000643	9.9e-05	0.000211	0.000636	5.8e-05	0.000708	6.6e-05	0.000218	0.000388	0.000286	0.000546	0.000586	6e-05	0.000167	0.000515	0.000129
Terrisporobacter glycolicus	Bacteria	23.6559	0.000337	0.000375	0.000466	9.4e-05	2.4e-05	0.000107	0.000237	0.000892	0.000572	0.000521	0.00015	0.000195	0.000283	0.000478	0.000292	0.000634	0.000152
Caproiciproducens sp. NJN-50	Bacteria	33.3333	0.000335	0.000291	0.000448	0.000315	8.8e-05	8.6e-05	0.000323	0.00026	0.000885	0.000347	0.000323	0.000566	0.000355	0.000344	0.000492	8.5e-05	0.000185
Limnoglobus roseus	Bacteria	33.3333	0.000335	0.0002	0.000217	0.000573	0.0002	0.000313	5.9e-05	0.000967	0.00018	0.000482	0.000184	6.8e-05	0.000298	0.000273	0.000145	0.000812	0.000388
Hymenobacter nivis	Bacteria	36.5591	0.000335	0.000333	2.7e-05	0.000618	0.000154	0.000142	0.000209	0.000886	0.000303	0.000427	0.00024	0.000297	0.000387	0.000109	0.000419	0.000659	0.000107
Atlantibacter hermannii	Bacteria	33.3333	0.000334	3.4e-05	0.000967	0.000147	0.000411	0.000131	0.000516	0.000284	0.000286	0.000125	0.000549	0.000109	0.000177	0.000806	7.9e-05	0.000758	0.000122
Blastococcus saxobsidens	Bacteria	17.2043	0.000334	3.3e-05	0	9e-06	4e-06	6.4e-05	3e-06	0.002588	0.000104	0.000634	2.8e-05	2.6e-05	8.1e-05	1.3e-05	4e-05	0.001754	3e-05
Flavobacterium psychrophilum	Bacteria	41.9355	0.000333	0.000358	0.000134	0.000291	0.000123	0.000716	9e-05	0.000656	0.000292	0.000382	0.000284	3.4e-05	0.000252	0.000508	0.000512	0.000444	0.000252
Acinetobacter pittii	Bacteria	34.4086	0.000333	0.000615	2e-05	0.000275	0.0004	0.000162	0.000161	0.00037	0.000612	0.000216	0.000453	4.7e-05	0.000411	0.000268	0.000225	0.000936	8.6e-05
Sphingopyxis macrogoltabida	Bacteria	32.2581	0.000333	0.000981	5.5e-05	6.4e-05	8.7e-05	0.000257	0.000317	0.000607	0.00027	0.000295	0.000372	0.000287	9.2e-05	0.000158	0.000113	0.000542	0.00078
Corynebacterium glutamicum	Bacteria	24.7312	0.000332	0.00083	0.000198	5.8e-05	5e-06	0.000114	0.000343	0.000437	0.000661	0.00043	0.000233	0.000373	0.000699	0.000148	0.000347	0.000102	0.000304
Lysinibacillus timonensis	Bacteria	37.6344	0.000332	0.000156	0.000157	0.000106	0.000444	0.000154	0.000939	0.000264	0.000399	0.000174	0.000493	0.000334	0.000925	0.000223	0.000234	0.000151	0.000111
Variovorax sp. HW608	Bacteria	20.4301	0.000332	1.9e-05	8.8e-05	0	4e-06	3.4e-05	0.00038	0.001989	0.000237	0.000517	0.000142	0.000296	4.7e-05	8.3e-05	0.000159	0.001326	4.5e-05
Alkaliphilus metalliredigens	Bacteria	41.9355	0.00033	0.000332	0.000179	0.000433	0.000203	0.000385	0.000275	0.000124	0.000668	0.000387	0.000272	0.000242	0.00026	0.000427	0.000552	0.000235	0.000272
Brevibacillus composti	Bacteria	33.3333	0.00033	7.6e-05	0.000228	0.000773	0.000252	1.4e-05	0.000274	0.0005	0.000519	0.000284	0.000376	0.000925	0.000212	0.000132	0.000307	0.000306	0.000108
Halanaerobium praevalens	Bacteria	36.5591	0.00033	0.001054	0.000262	0.000508	0.000325	0.000111	0.000236	2.7e-05	7.8e-05	0.000319	0.00034	0.000504	0.000429	0.000401	0.000236	0.000375	5.3e-05
Scytonema sp. NIES-4073	Bacteria	19.3548	0.000329	4.7e-05	0.000142	0	3.4e-05	2e-05	0	0.002477	5.9e-05	0.000625	2.6e-05	2.2e-05	4.2e-05	7.1e-05	8.1e-05	0.001686	2e-05
Elizabethkingia bruuniana	Bacteria	15.0538	0.000328	1.5e-05	3.1e-05	0.000493	4.3e-05	0	0.00172	1.1e-05	0.000232	0.000108	0.000552	4.7e-05	0.001483	0.000146	5.8e-05	0.000145	4.6e-05
Pseudonocardia sp. DSM 110487	Bacteria	35.4839	0.000328	0.000176	0.000117	0.000121	0.000227	0.0002	0.000531	0.001159	0.000124	0.000481	0.00017	0.00031	0.000346	0.000172	0.000111	0.00084	0.000166
Clostridium taeniosporum	Bacteria	35.4839	0.000327	0.000873	9.8e-05	0.000123	0.000391	0.000212	0.000322	0.000171	0.000374	0.000401	0.000251	0.000264	0.000437	0.000804	0.000314	0.000133	6.4e-05
Caproicibacterium lactatifermentans	Bacteria	31.1828	0.000327	0.000198	0.000442	0.000462	0.000115	3e-05	0.000144	0.000578	0.000685	0.000411	0.00024	0.000359	0.000333	0.000283	0.000575	0.000314	9.3e-05
Terrisporobacter sp. MCA3	Bacteria	26.8817	0.000326	0.000407	0.000473	7.5e-05	6.6e-05	7e-05	0.000205	0.000278	0.001052	0.000392	0.000258	0.000322	0.000668	0.000456	0.000318	2.5e-05	0.000182
Scandinavium goeteborgense	Bacteria	27.957	0.000326	5e-06	0.001005	0.000184	0.000469	0.000151	0.000618	5.9e-05	0.000205	6.9e-05	0.000587	7.8e-05	0.000144	0.000949	3.2e-05	0.000696	0.000117
Microbacterium sp. str. China	Bacteria	15.0538	0.000325	0.000148	8.3e-05	0.000117	3.1e-05	5.1e-05	0.000136	0.000222	0.001761	0.000496	0.000149	2.8e-05	0.000467	0.000127	0.00077	0	0.000514
Leuconostoc pseudomesenteroides	Bacteria	26.8817	0.000324	0.000414	0.000143	0.000169	6.4e-05	0.000616	4.8e-05	2.8e-05	0.001058	0.000453	0.000193	0.00051	0.0003	0.00036	0.000427	0	0.000364
Actinomyces sp. Chiba101	Bacteria	27.957	0.000324	0.000474	0.000158	0.000209	9e-06	0.000394	0.00014	0.000171	0.000997	0.000447	0.000199	0.000392	0.000599	0.000137	0.000513	3.2e-05	0.000252
Corynebacterium diphtheriae	Bacteria	29.0323	0.000324	0.00059	6.3e-05	0.000186	6.8e-05	0.000182	0.000578	0.000548	0.000352	0.000378	0.000269	0.000459	0.000752	7.2e-05	0.000323	0.000104	0.000211
Corynebacterium provencense	Bacteria	26.8817	0.000323	4.5e-05	3.2e-05	0.000588	0.000196	4e-06	0.000235	0.001313	0.000203	0.00052	0.000122	0.000879	0.000234	0.000628	3.9e-05	0.000146	8.5e-05
Clostridium tyrobutyricum	Bacteria	40.8602	0.000319	0.000381	0.000148	0.000144	0.000155	0.000169	0.000933	0.00018	0.000404	0.000232	0.000408	0.000141	0.00019	0.000306	0.000342	4.9e-05	0.000875
Clostridium kluyveri	Bacteria	35.4839	0.000319	0.000233	0.000319	0.000428	0.000247	9.6e-05	0.000317	0.000131	0.000765	0.000402	0.000234	0.000399	0.000243	0.000387	0.000532	0.000227	0.00014
Paenibacillus albicereus	Bacteria	34.4086	0.000318	0.000107	0.000177	0.000146	0.000514	6e-05	0.000816	0.000431	0.000282	0.00034	0.000297	0.000738	0.000463	0.00014	0.000205	0.000265	0.000104
Edwardsiella tarda	Bacteria	30.1075	0.000317	1.3e-05	0.000158	0.000368	0.000111	0.000275	0.000481	0.001027	0.000135	0.000166	0.000471	0.00022	0.000185	0.000913	0.000356	0.000208	8.6e-05
Paraphotobacterium marinum	Bacteria	33.3333	0.000316	0.000621	4.7e-05	0.000409	0.00038	0.000267	0.000604	3e-06	0.000129	0.000222	0.000413	0.000534	5.2e-05	0.000163	0.000452	0.000565	0.000127
Actinomyces sp. 432	Bacteria	35.4839	0.000316	0.000468	0.000413	0.000209	4.5e-05	0.000145	0.000172	0.00035	0.000745	0.000338	0.000294	0.000328	0.00049	0.000155	0.000458	0.000158	0.000288
Colwellia sp. PAMC 20917	Bacteria	30.1075	0.000316	0.000192	0.000246	0.000518	0.000325	0.000254	8.5e-05	0.000891	5.6e-05	0.000328	0.000304	5e-05	0.000204	0.000104	0.000674	0.000681	0.000142
Kosakonia arachidis	Bacteria	19.3548	0.000316	8e-06	0.001054	0.000258	0.000566	0.000184	0.000305	3.7e-05	0.000217	0.000105	0.000532	6.2e-05	0.000232	0.00075	0.000106	0.000711	7.3e-05
Sarcina sp. JB2	Bacteria	33.3333	0.000316	0.000461	0.000181	0.00026	4.4e-05	7.6e-05	0.000126	0.000918	0.000487	0.000436	0.000192	0.000295	0.000345	0.000197	0.000433	0.000538	6.9e-05
Staphylococcus hominis	Bacteria	26.8817	0.000315	6.2e-05	0.000585	0.000449	0.000154	8.5e-05	0.000568	2e-05	0.000618	0.000261	0.00037	0.000374	0.000363	0.000166	0.000128	0.000219	0.000625
Friedmanniella luteola	Bacteria	20.4301	0.000315	2.2e-05	0.000166	4e-06	1e-05	2.6e-05	0	0.002399	4e-05	0.000581	4.2e-05	2.2e-05	0.00016	1e-05	0.000119	0.0015	2.1e-05
Calothrix sp. NIES-2100	Bacteria	17.2043	0.000315	1.1e-05	1.2e-05	5.8e-05	0.000187	9.8e-05	7.4e-05	0.000384	0.001647	0.000145	0.000488	1.1e-05	0.000161	1.3e-05	6.2e-05	0.001463	0.000121
Burkholderia ubonensis	Bacteria	27.957	0.000315	0.000141	0.000333	0.000167	1.5e-05	2.5e-05	0.000315	0.001457	0.000161	0.000428	0.000199	0.000209	0.000111	6.5e-05	0.000319	0.001104	4.3e-05
Pseudonocardia autotrophica	Bacteria	32.2581	0.000314	0.00016	5.3e-05	9.9e-05	0.000266	0.000452	0.001115	0.000177	0.000135	0.000201	0.000429	0.000144	0.000138	5e-05	0.000388	0.000226	0.000895
Porphyromonas endodontalis	Bacteria	27.957	0.000314	0.000404	0.000222	0.000472	0.000143	0.00029	1.8e-05	0.000337	0.000612	0.000244	0.000385	6.5e-05	0.000639	0.000209	0.000361	0.000292	0.000289
Sphaerochaeta pleomorpha	Bacteria	48.3871	0.000313	0.000839	0.000234	0.000433	0.000177	0.000363	0.000134	9.2e-05	0.000204	0.000273	0.000354	0.000435	0.000334	0.00022	0.000333	0.000435	0.000118
Pseudomonas knackmussii	Bacteria	27.957	0.000313	7.9e-05	0.000746	9.9e-05	0.000104	0.000816	0.000113	0.000441	0.000187	0.000377	0.000248	0.000476	0.000747	9.4e-05	0.000174	0.000282	8.7e-05
Aeromonas hydrophila	Bacteria	36.5591	0.000313	0.000229	0.000307	0.000376	0.000128	0.000376	0.000503	0.000152	0.000415	0.00013	0.000499	0.000486	0.000265	0.000471	0.000217	0.000166	0.000302
Paenibacillus glucanolyticus	Bacteria	22.5806	0.000313	7.7e-05	0.000707	0.000248	0	5.9e-05	0.000266	0.000184	0.001015	0.000394	0.00023	0.000267	0.000288	0.000124	0.001007	4.5e-05	0.000117
Lysobacter sp. 5GHs7-4	Bacteria	25.8065	0.000312	0.000558	0.000135	0.000675	4.3e-05	0.000499	0.0005	1.7e-05	1.7e-05	0.000321	0.000303	1.7e-05	0.000169	0.000249	0.000558	0.000215	0.00064
Ethanoligenens harbinense	Bacteria	33.3333	0.000312	0.000386	0.000237	8.8e-05	0.000154	0.000198	0.000208	0.000338	0.000879	0.00029	0.000335	0.00027	0.000469	0.000432	0.000413	9.5e-05	0.000206
Peptoclostridium acidaminophilum	Bacteria	32.2581	0.000312	0.000372	0.000208	0.000238	0.000228	0.000215	0.000107	0.000173	0.000923	0.000346	0.000277	0.000395	0.000356	0.000375	0.000323	0.000186	0.000249
Psychrobacillus sp. INOP01	Bacteria	21.5054	0.000312	2.8e-05	7e-06	1.1e-05	1.8e-05	6e-05	0.002079	2.4e-05	0.000191	5e-05	0.000579	3.5e-05	3.7e-05	3.4e-05	0.00013	3.4e-05	0.001547
Natranaerofaba carboxydovora	Bacteria	25.8065	0.000311	0.00024	0.000129	0.000142	2e-05	7.8e-05	0.001687	1.8e-05	0.000121	0.00014	0.000486	6.6e-05	0.001364	0.000234	0.000106	3.7e-05	3.6e-05
Streptomyces capitiformicae	Bacteria	21.5054	0.000311	2.7e-05	3.6e-05	0.000332	9e-06	0.001892	3.9e-05	4.2e-05	4.4e-05	0.000588	2.8e-05	1.7e-05	4.3e-05	4e-06	0.001458	2.7e-05	0.000261
Lederbergia lenta	Bacteria	41.9355	0.000311	0.000758	0.000225	0.000276	4.5e-05	0.000222	0.000506	5.4e-05	0.000369	0.000224	0.0004	0.000357	8.2e-05	0.000299	0.00047	0.000369	0.000292
Bisgaardia hudsonensis	Bacteria	32.2581	0.00031	0.000462	0.00024	0.000734	2e-05	0.000256	0.000455	0.000155	0.000135	0.000401	0.000217	0.000287	0.000471	0.000258	0.00014	0.000153	0.000544
Roseibium aggregatum	Bacteria	30.1075	0.00031	8.6e-05	5.5e-05	0.000159	2.3e-05	3.1e-05	0.000828	0.000177	0.001066	0.000234	0.000387	0.000205	0.000156	0.00057	4.8e-05	0.000826	8e-05
Fervidobacterium pennivorans	Bacteria	36.5591	0.00031	0.00059	0.000122	0.000309	9.3e-05	0.000179	0.000824	0.000258	6.7e-05	0.000301	0.000319	0.000541	0.000465	0.000244	0.000258	0.000215	0.000141
Shimwellia blattae	Bacteria	27.957	0.000309	1.9e-05	0.001053	0.000115	0.000366	0.000306	0.000485	2.5e-05	0.000203	0.000134	0.000488	0.000118	8.7e-05	0.000706	6e-05	0.000865	5.7e-05
Lactobacillus amylovorus	Bacteria	29.0323	0.000309	0.000168	0.000243	8.4e-05	0.000366	0.000107	0.00037	0.000362	0.000762	0.000314	0.000303	0.000408	0.000326	0.000292	0.000392	3.1e-05	0.000408
Microbacterium atlanticum	Bacteria	19.3548	0.000308	2.4e-05	0.000201	0	6.6e-05	4.4e-05	0.001865	4.5e-05	0.000177	9.2e-05	0.000528	5.7e-05	3.7e-05	0.000115	0.000144	5.1e-05	0.001403
Actinomyces sp. Z16	Bacteria	32.2581	0.000305	0.000446	0.000183	0.00014	5.3e-05	0.000234	8.7e-05	0.000215	0.001053	0.000407	0.0002	0.000311	0.0005	0.000191	0.000441	4.6e-05	0.000326
Actinomadura verrucosospora	Bacteria	26.8817	0.000304	4.8e-05	8e-05	0.000185	0.000557	0.000149	6e-06	0.001163	0.00028	0.000334	0.000274	0.000102	0.000359	4.2e-05	8.8e-05	0.001117	7.2e-05
Brevibacillus agri	Bacteria	30.1075	0.000304	7.4e-05	0.0001	0.000418	9e-06	3e-05	0.000603	0.000471	0.000707	0.000317	0.00029	0.00044	0.000232	6.4e-05	0.000494	0.000478	9.5e-05
Tsukamurella tyrosinosolvens	Bacteria	26.8817	0.000304	4.3e-05	2.7e-05	5.9e-05	5.9e-05	4.1e-05	0	0.001266	0.000969	0.000258	0.00035	7.7e-05	0.000319	0.000115	3.8e-05	0.001217	1.8e-05
Luteimonas sp. MC1825	Bacteria	19.3548	0.000303	5e-05	0.00057	6.9e-05	0.000135	0.000337	9.7e-05	0.000407	0.000811	0.000256	0.00035	0.000225	0.000682	0.000352	0.000294	0	0.000265
Streptomyces sp. NEAU-sy36	Bacteria	27.957	0.000303	1.5e-05	5e-05	0.000473	6.9e-05	3.2e-05	3.7e-05	0.001645	0.000169	0.000443	0.000159	7.1e-05	7.4e-05	0.000422	5.8e-05	0.001145	4.7e-05
Dyadobacter sp. NIV53	Bacteria	24.7312	0.000302	4e-05	2.3e-05	0.000238	0.001458	3e-06	0.000346	1.7e-05	0.000224	0.000447	0.000154	4e-05	0.000151	5.5e-05	0.000329	0.001079	0.000113
Flaviflexus salsibiostraticola	Bacteria	26.8817	0.000301	7.7e-05	0.000493	0.000338	1e-06	2.4e-05	0.000464	0.000809	0.000278	0.000199	0.000406	7e-05	0.000122	0.000613	0.000487	0.000252	0.000288
Sandaracinus amylolyticus	Bacteria	32.2581	0.000301	6.5e-05	9.1e-05	0.000176	3.5e-05	9.6e-05	6.8e-05	0.001719	0.000237	0.000486	0.000112	0.00012	0.000177	5.5e-05	0.00016	0.001161	8.8e-05
Bradyrhizobium sp. CCBAU 53340	Bacteria	15.0538	0.000301	1e-05	0.000252	4.4e-05	1.7e-05	1.3e-05	4e-05	0.002001	0.000161	0.000566	2.9e-05	2e-05	0.000152	2.6e-05	0.000162	0.001393	0
Streptomyces roseochromogenus	Bacteria	22.5806	0.0003	2.6e-05	5.7e-05	9e-06	8.1e-05	5e-06	0.001988	7.5e-05	0.000102	5e-05	0.000556	4.6e-05	5.9e-05	5.6e-05	0.001541	3.1e-05	2.3e-05
Burkholderia dolosa	Bacteria	25.8065	0.0003	4.9e-05	1.2e-05	0.00037	0.000454	0.000454	0.000344	0.00015	0.000508	0.000108	0.000497	0.000214	0.000827	0.000258	4.5e-05	0.000322	0.000124
Paenibacillus baekrokdamisoli	Bacteria	37.6344	0.0003	1.8e-05	0.000267	6.8e-05	0.000789	0.000326	0.000155	0.000314	0.000458	0.000113	0.00049	0.000303	0.000571	0.000117	0.000183	0.000465	0.000138
Streptomyces sp. AgN23	Bacteria	29.0323	0.000299	0.000324	0.000328	0.00067	0.000346	0.000288	0.000207	0.000215	1.7e-05	0.000172	0.00043	0.000223	0.000333	0.000131	0.000462	0.000347	0.000276
Metabacillus sp. KUDC1714	Bacteria	40.8602	0.000299	0.000219	0.000239	0.000227	0.000161	0.000175	0.000146	0.000686	0.000558	0.000199	0.000401	0.000111	0.000169	0.00069	0.000282	0.000359	0.000219
Clostridium septicum	Bacteria	31.1828	0.000297	0.000587	0.000269	0.000164	0.000236	3.8e-05	0.000409	0.000296	0.000371	0.000296	0.000298	0.000571	0.000335	0.000424	0.00029	6.7e-05	0.000126
Flavobacterium sp. B183	Bacteria	36.5591	0.000296	0.000394	0.000314	0.000339	0.000179	0.000183	0.000308	0.000145	0.000501	0.000271	0.000323	0.000116	0.000271	4.7e-05	0.000553	0.000376	0.000373
Clostridium sp. BNL1100	Bacteria	34.4086	0.000295	9.8e-05	0.000212	0.000568	0.000243	6e-05	0.000312	0.000301	0.000552	0.000294	0.000296	0.000274	0.000401	0.000408	0.000444	4.8e-05	0.000208
Staphylococcus felis	Bacteria	21.5054	0.000294	3.4e-05	0.00065	0.000138	4.3e-05	2e-06	4.5e-05	0.001205	0.000369	0.000455	0.00013	4.3e-05	0.000172	0.000122	5.7e-05	0.000822	0.00051
Duganella sp. AF9R3	Bacteria	34.4086	0.000294	0.000184	7.2e-05	0.000139	0.000392	0.000197	0.000147	0.001153	9.9e-05	0.000114	0.000477	0.000149	0.000449	0.000889	0.000159	0.000139	4.1e-05
Catellatospora sp. IY07-71	Bacteria	23.6559	0.000293	9.3e-05	9.6e-05	0.001337	1.2e-05	2.3e-05	8e-06	0.000583	0.000184	0.00051	7.1e-05	3.3e-05	0.000112	0.000472	0.000132	0.000364	0.000651
Bifidobacterium eulemuris	Bacteria	33.3333	0.000293	9.8e-05	0.000157	0.000223	0.000254	0.000353	9e-05	0.000779	0.000409	0.00029	0.000296	0.000311	0.000455	0.000197	0.000175	0.000383	0.000226
Enterobacter cancerogenus	Bacteria	24.7312	0.000292	3e-06	0.000924	0.00012	0.000383	0.000177	0.000576	7.7e-05	0.000163	7.5e-05	0.000513	9.6e-05	0.000127	0.000813	2.2e-05	0.00066	8.8e-05
Leifsonia xyli	Bacteria	31.1828	0.000292	0.000282	4.4e-05	0.000378	3.8e-05	6.5e-05	0.001033	0.000415	5e-05	0.000445	0.000135	0.000911	0.0001	4.4e-05	9.2e-05	0.000454	0.000159
Pseudoclostridium thermosuccinogenes	Bacteria	34.4086	0.000292	0.000198	0.000237	0.000266	0.00022	7.2e-05	0.000197	9.9e-05	0.001021	0.000333	0.00025	0.000424	0.000228	0.0004	0.000371	0.000153	0.000197
Leuconostoc suionicum	Bacteria	10.7527	0.000291	0.000488	6.9e-05	0.000234	0	6.2e-05	0	4.1e-05	0.001379	0.000289	0.000294	0.000338	0.000446	0.000569	0.000366	0	6.7e-05
Listeria innocua	Bacteria	25.8065	0.000289	4e-05	0.002033	8.7e-05	4e-05	8.4e-05	4e-06	4.9e-05	0.000248	0.000478	9.6e-05	4.8e-05	0.000102	0.00017	7.4e-05	0	0.001312
Tenacibaculum todarodis	Bacteria	25.8065	0.000289	0.000185	0.000158	4e-05	0.001204	0.000331	6e-06	0.000167	0.000189	0.000157	0.000424	1.7e-05	0.000861	0.000173	0.000309	0.000278	6.4e-05
Cellulomonas sp. Y8	Bacteria	30.1075	0.000288	0.000482	3.9e-05	0.000361	0.000154	7.6e-05	5e-06	0.000719	0.000464	0.000424	0.000149	0.000184	0.000169	0.000574	5.4e-05	0.000716	6.2e-05
Pseudomonas chlororaphis	Bacteria	35.4839	0.000288	0.000867	0.000125	0.000178	0.000103	0.000121	0.000132	0.000259	0.00049	0.000209	0.000369	0.000543	0.000163	0.000567	0.00028	9.4e-05	0.000133
Paenibacillus odorifer	Bacteria	34.4086	0.000287	0.000145	0.000299	0.000668	0.000173	0.000288	0.000131	8.7e-05	0.000492	0.000296	0.000279	0.000305	0.000266	0.000194	0.00031	9.6e-05	0.000542
Paenibacillus stellifer	Bacteria	30.1075	0.000287	0.000189	6.6e-05	0.000235	4.6e-05	3.8e-05	0.000236	0.000384	0.001075	0.000354	0.00022	0.000269	0.000348	0.000168	0.000402	1.5e-05	0.000505
Leclercia pneumoniae	Bacteria	26.8817	0.000287	7.6e-05	0.000802	0.000125	0.000352	0.000112	0.000546	5.5e-05	0.000294	0.00013	0.000447	0.000179	0.000159	0.000723	0.000129	0.000449	0.00013
Serratia liquefaciens	Bacteria	21.5054	0.000287	3e-06	0.000255	0.000976	3.9e-05	0.000479	0.000189	0.000237	0.000107	0.000435	0.000136	0.000112	2.4e-05	0.000186	2e-05	0.001352	3e-06
Desulfosarcina widdelii	Bacteria	29.0323	0.000286	0.000266	8.9e-05	0.000745	0.000114	1.1e-05	2.6e-05	0.000178	0.000819	0.000283	0.000289	0.000118	0.000146	0.000265	0.000246	0.000277	0.00065
Mycobacteroides chelonae	Bacteria	27.957	0.000283	4.2e-05	3.6e-05	0.000985	8e-05	5.4e-05	1.7e-05	0.0008	0.00025	0.000489	7.2e-05	0.000108	0.00016	0.00014	8.8e-05	0.000344	0.000829
Bosea vaviloviae	Bacteria	25.8065	0.000281	2.4e-05	0.00027	1.9e-05	4e-06	3.9e-05	9.3e-05	0.001767	0.000156	0.000468	9.1e-05	7.9e-05	0.000193	3.9e-05	0.000119	0.00117	4.4e-05
Bradyrhizobium sp. CCBAU 53338	Bacteria	18.2796	0.000281	5.1e-05	0.00011	6e-05	5.4e-05	5e-06	0.000102	0.001854	0.000116	0.000501	5.7e-05	5.8e-05	8.9e-05	6.7e-05	9.5e-05	0.001338	0
Candidatus Symbiopectobacterium sp. SyEd1	Bacteria	30.1075	0.000281	0.000112	0.000416	7.8e-05	0.000177	1.4e-05	0.000233	0.000985	0.000312	0.000301	0.000259	0.000121	0.000109	0.000409	0.000119	0.000885	4.6e-05
Bradyrhizobium genosp. L	Bacteria	29.0323	0.00028	0.000193	0.000158	0.000141	5.9e-05	6e-06	0.000102	0.001478	0.000185	0.000457	0.0001	7.1e-05	0.000157	0.000224	0.000121	0.001089	0
Massilia lutea	Bacteria	31.1828	0.00028	6.3e-05	8.5e-05	0.0002	0.000555	0.000108	0.000878	3.1e-05	0.000269	0.000206	0.000356	0.000521	9.2e-05	6e-05	8.3e-05	0.000662	0.000252
Clostridium gasigenes	Bacteria	33.3333	0.00028	0.000256	0.000188	0.000695	4.9e-05	0.000185	0.000328	0.000116	0.000395	0.000218	0.000344	0.000335	0.00022	0.000347	0.000648	8.3e-05	5.9e-05
Corynebacterium deserti	Bacteria	27.957	0.000279	0.000205	9e-06	0.000451	0.000123	0.000286	0.000142	0.000148	0.000813	0.000249	0.00031	4.8e-05	5.4e-05	0.000152	0.000307	0.000671	0.000412
Clostridium saccharobutylicum	Bacteria	37.6344	0.000278	0.000212	0.000331	0.000477	0.000158	0.000127	0.000149	0.000204	0.00057	0.000264	0.000293	0.000221	0.000366	0.000219	0.000375	0.000169	0.000308
Pseudodesulfovibrio mercurii	Bacteria	30.1075	0.000277	2.4e-05	0.000322	0.000647	4.7e-05	4e-06	0.000414	0.000691	0.000105	0.000176	0.000379	7.5e-05	0.000108	0.000418	0.000622	3.6e-05	0.000406
Buttiauxella agrestis	Bacteria	27.957	0.000276	8e-06	0.000765	0.00015	0.000448	3.9e-05	0.000605	7e-05	0.000189	6.6e-05	0.000491	0.000145	0.000152	0.000778	6.5e-05	0.000434	0.000135
Deinococcus geothermalis	Bacteria	19.3548	0.000276	1.6e-05	0.001916	5e-06	1e-05	1.5e-05	7.8e-05	0.000289	0.000154	0.000516	3.1e-05	7.8e-05	4e-05	1e-06	0.001221	0.000178	9.1e-05
Pseudomonas mendocina	Bacteria	36.5591	0.000276	1.7e-05	0.00118	0.000272	3.4e-05	7.8e-05	0.000202	0.000402	0.000183	0.000373	0.000177	0.000147	0.000236	0.000158	8.4e-05	0.000872	0.000135
Sphingomonas sp. CL5.1	Bacteria	18.2796	0.000276	1.1e-05	5.4e-05	0	7e-06	1.8e-05	0.000256	0.001762	0.000185	0.000467	8e-05	0.000198	0.000195	4e-05	0.000144	0.001038	5e-06
Enterococcus saigonensis	Bacteria	30.1075	0.000276	2.8e-05	3.2e-05	0.000781	0.000744	4.1e-05	5e-05	5.6e-05	0.000416	0.000129	0.000426	0.000633	0.000124	0.000173	0.000498	5.2e-05	0.000184
Lysobacter capsici	Bacteria	22.5806	0.000275	0.000202	5.7e-05	0.000191	6e-05	0.000125	7e-06	0.001452	0.000171	0.000427	0.00012	0.000248	0.000118	1.1e-05	0.000114	0.000946	0.000181
Treponema phagedenis	Bacteria	31.1828	0.000275	0.000379	0.00035	0.000459	0.000137	5e-05	0.000349	0.000141	0.000339	0.000258	0.000293	0.000354	0.000436	0.000219	0.000438	1.1e-05	0.000193
Caulobacter segnis	Bacteria	29.0323	0.000275	2.3e-05	0.001141	0.000108	3.3e-05	1.6e-05	2.4e-05	0.000931	0.000123	0.000479	6.7e-05	8.5e-05	9.9e-05	6.2e-05	0.000101	0.001202	6.3e-05
Rhodococcus erythropolis	Bacteria	15.0538	0.000275	2.4e-05	4.3e-05	0	8e-06	2e-05	0.000297	0.001434	0.000432	0.000372	0.000176	0.000182	0.000321	0.000363	3.3e-05	0.000756	0
Paenibacillus crassostreae	Bacteria	36.5591	0.000274	0.000492	0.000103	0.000164	8.5e-05	0.000119	0.000636	9.8e-05	0.000453	0.000252	0.000297	0.000317	0.000307	0.000384	0.000349	0.000138	0.000167
Proteiniphilum saccharofermentans	Bacteria	35.4839	0.000273	6e-06	8.3e-05	0.000626	9.1e-05	0.000365	9.8e-05	0.000635	0.000281	0.000188	0.000361	0.000207	0.00011	0.000232	0.000337	0.000385	0.00036
Clostridium thermarum	Bacteria	34.4086	0.000273	0.000402	0.000253	0.000101	0.000171	9.1e-05	4e-05	0.000486	0.000653	0.000318	0.000227	0.0002	0.000377	0.000324	0.000246	0.000289	0.000204
Cystobacter fuscus	Bacteria	35.4839	0.000272	0.000118	7.7e-05	0.000423	0.000273	0.000337	6e-06	0.000859	0.000101	0.000348	0.000195	3.6e-05	0.000558	0.000134	5.7e-05	0.000687	0.000128
Haliangium ochraceum	Bacteria	29.0323	0.000272	0.000204	4.8e-05	0.000394	1.5e-05	1.8e-05	3e-06	0.001468	8.9e-05	0.000409	0.000132	3.2e-05	7.3e-05	0.000184	4.6e-05	0.001055	0.000215
Mycobacterium diernhoferi	Bacteria	33.3333	0.000272	0.000918	0.000105	0.000824	3.7e-05	2.6e-05	0.000119	4.5e-05	5.3e-05	0.000345	0.000197	0.00028	9e-05	0.000398	0.000126	0.000323	0.00043
Lactobacillus kefiranofaciens	Bacteria	26.8817	0.000272	0.000974	0.000229	9.8e-05	5.7e-05	0.000239	7.4e-05	0.000169	0.000318	0.000146	0.000401	0.000126	0.000315	0.000125	0.000866	0	0.000171
Streptococcus marmotae	Bacteria	27.957	0.000271	3.6e-05	8.5e-05	0.000609	0.000752	0.000289	2.7e-05	0.000111	0.000216	0.000159	0.000386	0.00062	0.000101	7.4e-05	0.000111	0.000223	0.000497
Enterobacter mori	Bacteria	19.3548	0.000271	7e-06	0.000919	0.000142	0.000627	2.5e-05	0.000339	5e-06	0.000191	6.1e-05	0.000486	0.000133	0.000161	0.000756	5.7e-05	0.000536	3.6e-05
Microvirga sp. VF16	Bacteria	24.7312	0.000271	2.3e-05	5.4e-05	0.000377	1.4e-05	1e-05	0.000185	0.001365	0.000194	0.000367	0.000172	0.000154	0.000153	0.000317	5.1e-05	0.00092	2.8e-05
Fusobacterium pseudoperiodonticum	Bacteria	31.1828	0.00027	0.000724	6.5e-05	0.000251	4.2e-05	0.000182	0.000494	0.000178	0.000183	0.000342	0.000197	9.9e-05	0.000217	0.000723	8.5e-05	0.000443	9.9e-05
Dermatophilus congolensis	Bacteria	34.4086	0.00027	0.000143	0.000197	8.4e-05	0.000507	0.000245	0.000531	0.0004	5e-05	0.000195	0.000346	4.4e-05	0.000455	0.000353	0.00053	0.000179	5.4e-05
Kocuria varians	Bacteria	22.5806	0.00027	0.000194	0.001193	0.000294	1.2e-05	7.7e-05	6.6e-05	6.1e-05	0.000395	0.000384	0.000153	9.7e-05	0.000427	2.1e-05	0.000819	0	0.000212
Burkholderia sp. DHOD12	Bacteria	24.7312	0.000269	0.000484	4.8e-05	0.000149	0.000104	0.000243	0.000664	8.3e-05	0.000328	0.000341	0.000196	0.000546	0.000264	0.000338	0.000341	0.000134	1.9e-05
Maribacter sp. HTCC2170	Bacteria	25.8065	0.000269	3.8e-05	4.2e-05	0.000868	0.000297	7e-05	0.000189	2.9e-05	0.000559	4.4e-05	0.000498	0.000116	0.000247	0.000127	4.8e-05	0.000985	6.3e-05
Microbacterium sp. 1S1	Bacteria	20.4301	0.000268	5.1e-05	0.000197	0.000418	1.8e-05	3.1e-05	0.000322	0.000217	0.000877	0.000434	9.9e-05	0.000261	0.000232	0.000363	0.000494	0	0.000271
Methylobacterium tardum	Bacteria	27.957	0.000268	1e-05	0.000275	0.000328	1.9e-05	3.3e-05	0.000239	0.000843	0.000447	0.000389	0.000144	0.000137	0.000529	2.5e-05	0.000209	0.000357	0.000311
Actinomyces weissii	Bacteria	26.8817	0.000268	0.000285	0.000165	4.8e-05	3e-06	0.000145	0.000209	0.000673	0.000629	0.000385	0.000148	0.000188	0.000452	8.6e-05	0.000305	0.000359	0.000187
Jeotgalibaca sp. MA1X17-3	Bacteria	38.7097	0.000267	5.8e-05	0.000141	0.000353	7.9e-05	0.000329	0.000292	0.000341	0.00053	0.000233	0.000303	0.000259	0.000128	7.4e-05	0.000503	0.000449	0.000167
Achromobacter xylosoxidans	Bacteria	31.1828	0.000267	6.8e-05	0.000225	0.000251	6.6e-05	0.000143	0.000327	0.000748	0.000343	0.000289	0.000245	0.000321	0.000238	0.000262	0.000281	0.000293	0.000211
Gordonia terrae	Bacteria	16.129	0.000267	4.4e-05	0.000108	1.6e-05	3e-06	3e-06	1.2e-05	0.002035	3.2e-05	0.000489	3.9e-05	3.3e-05	5.5e-05	6e-06	9.4e-05	0.001295	6.8e-05
Priestia filamentosa	Bacteria	35.4839	0.000266	0.000374	9e-05	0.000233	8.1e-05	9e-06	0.000213	0.00074	0.0004	0.000211	0.000323	0.000191	0.000183	0.000853	0.000255	0.000162	2.4e-05
Jeotgalibaca ciconiae	Bacteria	27.957	0.000266	0.000115	2.5e-05	1.1e-05	8.5e-05	8.2e-05	0.000819	0.000116	0.00082	9.2e-05	0.000443	0.000161	0.000102	6.4e-05	0.000472	0.000657	0.000107
Caballeronia sp. Sq4a	Bacteria	13.9785	0.000266	2.7e-05	4.7e-05	0	0.000149	1.3e-05	0	0.001865	0.000122	0.00044	8.8e-05	0	0.000147	6.7e-05	5.1e-05	0.001258	3e-05
Pedobacter sp. Q8-18	Bacteria	35.4839	0.000266	8.9e-05	0.00048	0.000563	0.0002	0.000132	8.2e-05	0.000403	0.000222	0.000249	0.000282	2.7e-05	0.000372	9.6e-05	0.000783	0.000128	0.00015
Aquihabitans sp. G128	Bacteria	26.8817	0.000265	2.6e-05	3.8e-05	5e-06	1.6e-05	0.000111	0.000201	0.001694	0.000112	0.000454	7.2e-05	0.000134	7.7e-05	7.6e-05	5.4e-05	0.001174	4.4e-05
Enterobacter sp. RHBSTW-00994	Bacteria	22.5806	0.000265	1.4e-05	0.000831	6.4e-05	0.00037	0.000209	0.000557	2.7e-05	0.000121	7.5e-05	0.000458	0.000153	8.8e-05	0.0007	3.2e-05	0.000629	3.4e-05
Hymenobacter sp. PAMC 26554	Bacteria	27.957	0.000265	0.000143	2.2e-05	0.000386	1.5e-05	0.000176	0.000279	0.000148	0.000899	0.000186	0.000345	0.000271	0.00013	1.7e-05	7.9e-05	0.000938	0.000123
Microbacterium sp. No. 7	Bacteria	18.2796	0.000264	3.4e-05	0.000104	0	2.6e-05	1.8e-05	0.000101	0.001884	5.7e-05	0.000458	6.7e-05	0.000109	7.6e-05	3.3e-05	8.6e-05	0.001208	3.5e-05
Sporosarcina ureae	Bacteria	39.7849	0.000264	0.00022	0.000252	0.000246	0.000145	0.000239	0.000226	0.000194	0.000584	0.000285	0.000244	0.000309	0.000157	0.000314	0.000221	0.000283	0.000311
Microvirga ossetica	Bacteria	30.1075	0.000263	0.000104	0.00025	0.000267	2e-05	2.6e-05	0.000578	0.000816	9e-05	0.000326	0.000199	0.00036	8.9e-05	0.000108	0.000186	0.00072	0.000103
Clostridium sp. BJN0001	Bacteria	33.3333	0.000263	0.000355	0.000167	0.000301	0.000292	0.000118	0.000194	0.000242	0.000419	0.000255	0.000272	0.000337	0.000531	0.000207	0.0003	4.9e-05	0.000153
Pseudescherichia vulneris	Bacteria	26.8817	0.000263	0.000192	0.000802	0.000127	0.00029	0.00014	0.000455	2.5e-05	0.000141	7.1e-05	0.000459	6.2e-05	9.2e-05	0.000635	0.000198	0.000541	8.2e-05
Baekduia soli	Bacteria	20.4301	0.000262	1.7e-05	1.4e-05	4e-06	3e-05	2.5e-05	0.000112	0.001946	4.9e-05	0.000491	2.9e-05	6.3e-05	5.1e-05	2.1e-05	1.6e-05	0.001379	2e-06
Bordetella trematum	Bacteria	32.2581	0.000262	2.9e-05	0.000124	0.000121	1.1e-05	0.00019	0.000561	0.000613	0.000455	0.000294	0.00023	0.000383	0.000165	0.000129	0.000125	0.000485	0.000277
Nocardioides daphniae	Bacteria	29.0323	0.000262	0.000156	6.5e-05	0.000272	0.000192	0.000216	4.3e-05	0.000722	0.000433	0.000231	0.000293	3e-05	0.000214	0.00012	0.000157	0.000794	0.000225
Streptomyces seoulensis	Bacteria	37.6344	0.000262	0.000163	0.000131	0.000268	7e-05	2e-05	0.00012	0.001187	0.000189	0.000374	0.000146	0.00021	0.000284	8.9e-05	8.5e-05	0.000731	0.000146
Syntrophobotulus glycolicus	Bacteria	31.1828	0.000261	0.000108	0.000318	9.2e-05	3.3e-05	3e-05	0.000357	7.4e-05	0.001074	0.000288	0.000234	0.000148	0.00029	0.000452	0.000284	6.9e-05	0.000342
Anaerococcus prevotii	Bacteria	27.957	0.00026	0.000264	1.1e-05	6.9e-05	4.3e-05	0.000119	9.9e-05	3.9e-05	0.001379	0.000404	0.000114	8.1e-05	0.00016	4.9e-05	0.001139	6.3e-05	3.4e-05
Cloacibacillus porcorum	Bacteria	30.1075	0.00026	2.7e-05	0.000396	0.000864	6.3e-05	3.3e-05	0.000164	0.000274	0.000283	0.000364	0.000154	0.000759	0.000225	6.3e-05	0.000415	3.2e-05	7.4e-05
Bradyrhizobium sp. I71	Bacteria	18.2796	0.00026	9e-06	7.7e-05	0.000108	1.1e-05	7.5e-05	0.000101	0.001684	0.000103	0.000403	0.000114	9.2e-05	0.000124	5.7e-05	7.3e-05	0.00117	8e-06
Tardibacter chloracetimidivorans	Bacteria	17.2043	0.00026	2.1e-05	8.7e-05	0	6e-06	1.1e-05	0.000135	0.001779	0.000137	0.000441	7.5e-05	0.000117	4.4e-05	1.5e-05	0.000133	0.001186	2.4e-05
Actinomyces marmotae	Bacteria	26.8817	0.00026	0.000962	7.6e-05	0.000123	3e-06	0.000283	4.5e-05	0.000146	0.000399	0.000248	0.000272	0.000175	0.000338	2.7e-05	0.000214	1.6e-05	0.000753
Neobacillus mesonae	Bacteria	45.1613	0.00026	0.000246	0.000384	0.000354	0.000155	0.00034	0.000116	5e-05	0.000436	0.00031	0.000208	0.000179	0.000146	0.000252	0.000357	0.00034	0.000277
Pediococcus pentosaceus	Bacteria	35.4839	0.000259	0.000211	0.000146	0.000466	0.000157	0.000147	0.000512	0.000142	0.000263	0.000228	0.00029	0.00022	0.000148	0.000424	0.000328	0.000123	0.00033
Comamonas thiooxydans	Bacteria	20.4301	0.000259	1.2e-05	0.000333	0.000214	8.4e-05	4.1e-05	0.001105	0.000163	0.000124	8.3e-05	0.000439	0.000617	0.000239	0.000128	0.000484	5.5e-05	3.7e-05
Niallia circulans	Bacteria	41.9355	0.000258	0.000211	0.000409	0.000341	0.000137	7.8e-05	0.000261	0.000406	0.000261	0.000305	0.00021	0.000236	0.00033	0.000206	0.000416	0.000181	0.000173
Methylobacterium radiodurans	Bacteria	33.3333	0.000258	0.000148	0.000158	0.000407	8.9e-05	3.8e-05	0.000648	0.000256	0.000303	0.000376	0.000137	0.000458	0.000133	0.00021	0.00037	0.00022	0.000162
Paenibacillus larvae	Bacteria	37.6344	0.000258	0.000147	0.000126	0.000259	0.000201	0.000275	0.000433	0.000218	0.000378	0.000187	0.00033	0.000385	0.000262	0.000261	0.000349	0.000243	5.4e-05
Paenibacillus macerans	Bacteria	33.3333	0.000257	0.000169	8.8e-05	0.00015	3e-05	3.7e-05	0.000482	0.000813	0.000304	0.000322	0.000191	0.000173	0.000191	7.8e-05	0.000422	0.000537	0.000113
Pragia fontium	Bacteria	27.957	0.000257	0.000123	4.3e-05	0.000144	0.001072	7.4e-05	0.000189	3.3e-05	0.000321	0.000122	0.000395	7.2e-05	0.000827	0.000205	0.000106	0.000237	7.6e-05
Limosilactobacillus pontis	Bacteria	30.1075	0.000257	8e-05	0.00043	0.000835	5.6e-05	0.000172	9.5e-05	0.000233	0.00018	0.000158	0.000357	0.000715	0.000234	0.000108	0.000201	2.4e-05	0.000269
Collinsella sp. zg1085	Bacteria	30.1075	0.000257	0.000581	0.000125	1.9e-05	0.000107	0.000216	0.000545	6.4e-05	0.000358	0.000292	0.00022	0.000555	0.000536	9.8e-05	0.000209	2.1e-05	0.000119
Massilia sp. PAMC28688	Bacteria	27.957	0.000257	9e-06	0.000212	0.00069	3.3e-05	1.1e-05	0.000219	0.000771	0.000143	0.000341	0.000171	0.000142	0.000234	6.2e-05	7.9e-05	0.000571	0.00042
Leptospira noguchii	Bacteria	25.8065	0.000256	0.000107	1.8e-05	0.000123	2.4e-05	3.8e-05	0.001348	1.5e-05	0.000318	0.000439	7e-05	0.001107	5.9e-05	0.000103	2.5e-05	3.1e-05	0.000247
Nostoc sp. Peltigera membranacea cyanobiont N6	Bacteria	27.957	0.000256	0.000768	6.8e-05	0.000195	4e-06	0.00017	0.000249	9.5e-05	0.000454	0.000258	0.000254	0.000266	0.00024	0.00042	0.000487	0.00012	2.4e-05
Paenibacillus lautus	Bacteria	30.1075	0.000256	0.000265	0.000207	0.000548	3.4e-05	0.000232	3.9e-05	4.3e-05	0.000653	0.000113	0.000402	9.7e-05	0.000257	0.000257	0.000384	0.000376	0.000155
Methylorubrum populi	Bacteria	29.0323	0.000255	3.3e-05	0.000141	6e-05	6.4e-05	1e-05	0.000182	0.001323	0.0003	0.000354	0.000154	0.000191	0.000183	0.00021	0.000125	0.000776	3.7e-05
Staphylococcus pasteuri	Bacteria	27.957	0.000255	0.000374	0.000681	0.000258	1.9e-05	7.5e-05	0.000165	2.7e-05	0.000495	0.000284	0.000226	3.7e-05	0.000199	0.000452	0.000107	0.000106	0.000642
Acidovorax sp. JMULE5	Bacteria	19.3548	0.000255	1.1e-05	8.7e-05	2.8e-05	5e-06	0.000366	0	0.001337	0.000268	0.000429	7.7e-05	3.7e-05	2.5e-05	8.6e-05	6.4e-05	0.001168	0.000115
Clostridium sp. C5S11	Bacteria	35.4839	0.000254	0.000302	0.00023	0.000136	0.000155	0.000118	0.000279	0.000188	0.000616	0.000281	0.000227	0.000407	0.000253	0.000336	0.000287	0.000111	0.000151
Actinoplanes sp. OR16	Bacteria	22.5806	0.000254	9.9e-05	0.000191	8e-06	1.9e-05	4e-05	4e-06	0.001604	0.000168	0.000317	0.00019	3.7e-05	0.000409	6.1e-05	0.000204	0.000754	2.2e-05
Kosakonia oryzae	Bacteria	15.0538	0.000254	8e-06	0.001006	0.000165	0.000253	1.6e-05	0.000553	5.4e-05	8.5e-05	3.2e-05	0.00048	8.3e-05	7.2e-05	0.000687	0	0.000626	9.8e-05
Streptococcus halichoeri	Bacteria	29.0323	0.000254	0.000105	6.1e-05	0.000314	0.000668	5.3e-05	0.00013	0.000346	0.000329	0.000138	0.000372	0.000541	0.00034	0.000138	0.000106	3.7e-05	0.000363
Acidovorax radicis	Bacteria	30.1075	0.000254	0.000488	0.000342	0.000503	2e-06	0.000135	0.000302	0.000147	0.000115	0.000257	0.00025	0.00017	0.000321	0.000283	0.000109	0.000538	9.9e-05
Clostridium bornimense	Bacteria	36.5591	0.000254	0.000347	0.000276	0.000117	0.000151	7e-05	0.000209	0.000331	0.000536	0.000273	0.000234	0.000302	0.000312	0.00027	0.000239	0.000335	6.9e-05
Streptomyces alboflavus	Bacteria	29.0323	0.000253	0.00011	0.000269	0.000694	8e-06	2.3e-05	0	0.000561	0.000387	0.000101	0.000409	2.6e-05	0.000266	0.000593	0.000111	0.000478	7.3e-05
Sphingomonas sp. LK11	Bacteria	15.0538	0.000253	3e-06	0.000106	0	8e-06	3.3e-05	0.000683	0.000942	0.000283	0.000316	0.000188	0.000552	0.000165	8e-06	0.000257	0.000524	0
Desulfovibrio sp. IOR2	Bacteria	24.7312	0.000253	4e-05	0.000521	0.000695	1.9e-05	6e-06	0.000127	0.000627	6.4e-05	9.8e-05	0.000411	0.000106	7.4e-05	0.000467	0.000503	0	0.000385
Carnobacterium maltaromaticum	Bacteria	30.1075	0.000253	0.000346	6.3e-05	4e-05	0.000147	0.000743	8e-05	1.7e-05	0.000534	0.000302	0.000202	0.000327	7.2e-05	0.000207	0.000823	0	8.5e-05
Carnobacterium divergens	Bacteria	27.957	0.000252	6e-05	0.000391	0.000243	0.000136	4.1e-05	0.000366	0.000157	0.000642	0.000344	0.000159	0.000129	0.000284	0.000401	0.000457	0	0.000255
Azorhizobium caulinodans	Bacteria	22.5806	0.000252	1.1e-05	0.00018	0.000111	8e-06	4e-06	3.9e-05	0.001684	8.8e-05	0.000411	8.9e-05	5.1e-05	0.000107	2.6e-05	0.000149	0.001072	6.8e-05
Bradyrhizobium cosmicum	Bacteria	27.957	0.000252	1.6e-05	6.3e-05	6.1e-05	7.4e-05	3.4e-05	8.5e-05	0.00149	0.000263	0.000436	6.4e-05	7.8e-05	4.9e-05	9e-05	6.2e-05	0.001133	6.9e-05
Microbacterium sp. PM5	Bacteria	26.8817	0.000252	7.4e-05	0.000233	4.9e-05	6e-06	0.000153	0.000287	0.000774	0.000479	0.000256	0.000247	0.000236	0.000254	0.000284	0.000218	0.000514	8e-06
Frankia casuarinae	Bacteria	25.8065	0.000251	1.3e-05	2e-06	2.1e-05	0.000212	4.6e-05	3e-06	0.00164	0.000146	0.000425	7.4e-05	0.000884	7e-05	6.5e-05	2.2e-05	1.5e-05	0.000468
Enterobacter sp. Colony194	Bacteria	20.4301	0.000251	0.000416	0.000361	0.000697	0.000123	4.9e-05	0.000254	5.7e-05	5.4e-05	0.000207	0.000296	2.8e-05	3.6e-05	0.00084	0.000323	0.000305	3.5e-05
Halobacillus litoralis	Bacteria	25.8065	0.000251	0.000255	1.2e-05	0.000156	6.1e-05	4e-06	0.001258	0.000164	5e-05	0.000427	7.1e-05	0.001045	3.7e-05	0.000207	5e-06	0.000222	3.3e-05
Georgenia sp. TF02-10	Bacteria	26.8817	0.000251	0.000189	9e-06	1.7e-05	8e-06	6.1e-05	5.2e-05	0.001507	0.000228	0.000414	8.4e-05	0.001114	0.000226	4.8e-05	8.8e-05	0	5.8e-05
Dehalococcoides mccartyi	Bacteria	36.5591	0.00025	0.00064	0.00015	0.000292	0.000115	6.7e-05	0.000102	0.000129	0.000481	0.000276	0.000224	9.2e-05	0.000259	0.00051	0.000436	9.4e-05	0.000133
Bradyrhizobium sp. CCBAU 051011	Bacteria	26.8817	0.00025	1e-05	0.000219	5.3e-05	1.3e-05	1.5e-05	0.000233	0.001462	9.3e-05	0.000427	7e-05	0.000107	5.8e-05	2.1e-05	0.000212	0.001026	4e-05
Amycolatopsis mediterranei	Bacteria	29.0323	0.00025	4e-05	4.3e-05	7.9e-05	2.5e-05	3e-05	1.9e-05	0.001644	0.000197	0.000435	6e-05	6.1e-05	0.000134	3.9e-05	7.5e-05	0.001079	7.1e-05
Enterococcus rotai	Bacteria	30.1075	0.000249	8e-05	3.7e-05	0.000314	0.000676	4.2e-05	8.6e-05	0.000528	0.000221	0.000218	0.000281	0.000548	0.000122	0.00013	5.2e-05	0.000518	0.00013
Bosea sp. Tri-49	Bacteria	30.1075	0.000249	0.000285	0.000157	0.0001	1.6e-05	8.7e-05	0.000672	0.000448	0.000225	0.000366	0.000129	0.00044	0.00012	0.00022	0.000212	0.000424	8.5e-05
Proteus penneri	Bacteria	16.129	0.000248	0.000491	0	0.000148	0.00012	0.00045	0.000132	0	0.000585	0.000252	0.000245	2.6e-05	0.000112	0.000479	0.000184	0.000451	0.000254
Chryseobacterium capnotolerans	Bacteria	16.129	0.000248	0.001297	6e-06	8e-06	1.1e-05	6e-06	0.000464	8e-06	0.000125	0.00046	3.1e-05	0.000276	4.2e-05	4.8e-05	3.7e-05	0.000104	0.000958
Formosa sediminum	Bacteria	34.4086	0.000248	0.001309	9.4e-05	0.00012	8.9e-05	5.5e-05	4.3e-05	0.000155	8.7e-05	0.000207	0.00029	3.8e-05	8.4e-05	0.000409	0.000262	0.000169	0.000534
Acidovorax antarcticus	Bacteria	26.8817	0.000248	0.001367	0.000112	2.2e-05	1.2e-05	2.1e-05	9.3e-05	0.000293	4.3e-05	0.000432	6e-05	0.000107	4.2e-05	2.7e-05	6.7e-05	0.000109	0.001098
Paenibacillus antarcticus	Bacteria	38.7097	0.000248	0.000137	0.000234	0.000322	5.8e-05	0.000179	0.000606	9.9e-05	0.000333	0.000211	0.000286	0.000252	0.00023	0.000148	0.00031	0.000343	0.000192
Clostridioides sp. ES-W-0016-02	Bacteria	29.0323	0.000248	0.000225	0.000251	0.000363	0.000166	0.000166	0.000248	0.000226	0.000337	0.000349	0.000144	0.00034	0.000357	0.000147	0.000469	3.8e-05	0.00013
Acinetobacter lwoffii	Bacteria	24.7312	0.000247	1.8e-05	0.00011	0.000137	2e-06	0.000293	0.00066	0.000378	0.000369	0.000138	0.00036	0.000544	0.000189	0.000259	0.000134	0.000319	5.9e-05
Pseudomonas versuta	Bacteria	27.957	0.000247	0.000303	0.000354	0.000141	0.000147	0.000128	0.000297	0.000592	6.4e-05	0.000294	0.0002	0.000331	7.7e-05	0.000147	0.000221	0.00042	0.00028
Tissierella sp. JN-28	Bacteria	34.4086	0.000247	0.0002	0.000368	0.000595	9.8e-05	4.1e-05	9.5e-05	8.5e-05	0.000502	0.00031	0.000183	0.000124	0.000282	0.000505	0.000489	2.1e-05	8.7e-05
Clostridium estertheticum	Bacteria	33.3333	0.000247	0.000183	0.000124	0.000209	0.000108	7.2e-05	0.000651	7e-05	0.000524	0.000303	0.00019	0.00023	0.000279	0.000221	0.000233	0.000411	0.000105
Lactobacillus sp. 3B(2020)	Bacteria	26.8817	0.000247	1.1e-05	0.000158	0.000624	3.8e-05	0.000447	2.9e-05	0.000503	0.000173	0.00017	0.000326	5.7e-05	0.000542	0.000563	6.8e-05	0.000192	8.8e-05
Shinella sp. HZN7	Bacteria	23.6559	0.000247	9e-06	4.2e-05	0.000522	2.5e-05	0.000187	0.000942	4.8e-05	0.000148	8.1e-05	0.000416	8e-05	0.000113	5.7e-05	0.000721	0.000327	0.000148
Tepidibacter sp. 8C15b	Bacteria	32.2581	0.000247	0.000342	0.000172	0.0003	3e-05	0.000248	0.000309	0.000211	0.000346	0.000328	0.000164	0.000176	0.000323	0.000277	0.000277	0.000235	0.000192
Anoxybacillus sp. PDR2	Bacteria	10.7527	0.000247	5e-06	1.8e-05	1.3e-05	2.8e-05	7.7e-05	0.000981	0.000793	6.4e-05	0.000208	0.000286	0.000774	0.000141	5.5e-05	0	0.000507	1.1e-05
Brachyspira pilosicoli	Bacteria	33.3333	0.000247	0.000178	7.1e-05	0.000178	8.7e-05	6.7e-05	0.00047	0.000847	9.5e-05	0.000361	0.000129	0.000102	0.000159	7.2e-05	0.000445	0.000536	0.000136
Nonomuraea nitratireducens	Bacteria	36.5591	0.000246	0.00029	0.000193	0.000123	0.000204	0.000368	6.9e-05	0.000434	0.000297	0.000283	0.000209	0.000101	0.000228	0.000281	0.000145	0.000414	0.000305
Azospirillum brasilense	Bacteria	30.1075	0.000245	7e-05	0.000103	9.8e-05	0.000236	0.000221	0.000131	0.000944	0.000195	0.000354	0.000135	0.000146	0.000408	7.9e-05	0.000153	0.000496	0.000163
Acetoanaerobium sticklandii	Bacteria	34.4086	0.000245	0.000286	0.000186	0.000428	6.5e-05	7e-05	0.000226	0.000166	0.000516	0.000244	0.000246	0.000198	0.000307	0.000557	0.000278	1.6e-05	0.000151
Porphyromonas sp. oral taxon 275	Bacteria	29.0323	0.000245	0.00019	4.3e-05	0.00087	3.5e-05	0.000484	8.1e-05	8.8e-05	0.00012	0.000247	0.000243	0.000111	0.000119	3.8e-05	6e-05	0.000533	0.000573
Mycolicibacterium parafortuitum	Bacteria	22.5806	0.000244	0.000114	0.000105	0.00128	1e-05	8e-06	3e-06	0.0004	2.5e-05	9.1e-05	0.000401	0.000994	0.000137	1.1e-05	8.2e-05	0.000178	8.2e-05
Streptococcus himalayensis	Bacteria	29.0323	0.000244	6.8e-05	0.000109	0.000247	0.000937	2.5e-05	6.7e-05	6.6e-05	0.000398	0.000134	0.000357	0.000818	0.000114	0.000132	0.000167	1.6e-05	0.00024
Enterobacter huaxiensis	Bacteria	30.1075	0.000244	7e-05	0.000449	0.00043	0.000184	7.7e-05	0.000316	0.000335	0.000132	0.000128	0.000363	5.7e-05	0.00019	0.00063	8.7e-05	0.000479	5.7e-05
Paenibacillus riograndensis	Bacteria	29.0323	0.000244	0.000244	0.000118	9e-05	7.8e-05	0.000463	0.000209	5.3e-05	0.000657	0.000317	0.000169	0.000139	0.000249	0.000312	0.000255	0.00046	5e-05
Nocardia wallacei	Bacteria	22.5806	0.000244	5.6e-05	7.3e-05	2.8e-05	1.8e-05	2.8e-05	1.8e-05	0.001762	6.6e-05	0.000438	4.5e-05	5.4e-05	4e-05	1.6e-05	9.2e-05	0.001174	4.4e-05
Rhodococcus fascians	Bacteria	32.2581	0.000243	0.000115	0.000121	6.4e-05	5.4e-05	0.00012	0.000226	0.001112	0.000187	0.000382	0.000102	8.9e-05	0.000158	0.000141	0.000142	0.000838	7e-05
Cryptobacterium curtum	Bacteria	25.8065	0.000243	0.000179	0.000327	0.000147	2.5e-05	0.00019	0.00044	0.000231	0.000417	0.00022	0.000266	0.000507	0.000308	0.000126	0.00031	0	0.000208
Massilia violaceinigra	Bacteria	30.1075	0.000243	4.7e-05	0.000118	0.000113	1.3e-05	1.3e-05	0.000328	0.001182	0.000186	0.000341	0.000143	0.000214	0.00017	7.1e-05	0.000155	0.000761	6.3e-05
Caulobacter soli	Bacteria	20.4301	0.000243	5e-05	0.000108	0	1e-05	8e-06	0	0.001662	0.000198	0.000438	4.3e-05	8e-06	0.000108	6e-05	0.000104	0.001125	1.4e-05
Nocardia cyriacigeorgica	Bacteria	27.957	0.000242	6.2e-05	2.8e-05	0.000278	1.2e-05	8.3e-05	0.000189	0.00124	9.2e-05	0.000372	0.000109	0.000173	0.00012	3.4e-05	6.7e-05	0.000933	9.5e-05
Tepidimonas taiwanensis	Bacteria	23.6559	0.000242	3e-06	0.000403	4.6e-05	4e-06	1.8e-05	0.000285	0.000914	0.000348	0.000376	0.000106	0.000147	6.9e-05	2.6e-05	0.00038	0.000614	0.000185
Bosea sp. ANAM02	Bacteria	22.5806	0.000242	8e-06	4.8e-05	0.000161	5e-06	1.8e-05	0.000433	0.001098	0.000206	0.000339	0.000143	0.000253	0.000117	2.6e-05	6.8e-05	0.000796	0.000167
Duganella sp. GN2-R2	Bacteria	30.1075	0.000242	1.4e-05	0.000235	0.000128	3.2e-05	7.9e-05	0.000947	0.000327	0.000181	0.000288	0.000196	0.000328	8.3e-05	0.000517	0.00013	0.000238	0.000198
Thermophilibacter immobilis	Bacteria	27.957	0.000242	0.000197	0.000313	4.1e-05	0.000318	0.000234	0.000104	0.000334	0.000415	0.000212	0.000272	0.000383	0.000367	8.1e-05	0.000352	1.9e-05	0.000239
Pseudonocardia broussonetiae	Bacteria	25.8065	0.000241	2.7e-05	0	1.6e-05	1.3e-05	4e-05	5.9e-05	0.001763	9.9e-05	0.000442	3.6e-05	6.8e-05	9e-05	2.2e-05	5e-05	0.001136	4.3e-05
Dermacoccus nishinomiyaensis	Bacteria	23.6559	0.000241	4.2e-05	0.000188	7.3e-05	0.000119	0.000218	3.9e-05	0.001057	0.000252	0.000335	0.000145	4.7e-05	0.000179	8.8e-05	0.000132	0.000893	7.6e-05
Acetobacterium sp. KB-1	Bacteria	32.2581	0.000241	0.000221	0.000124	0.000274	0.000143	0.000118	0.000172	6.1e-05	0.00078	0.000201	0.000282	0.000304	0.000229	0.000137	0.000311	0.000325	0.00013
Mycobacterium kansasii	Bacteria	26.8817	0.000241	2.4e-05	0.000291	0.000208	8e-06	5e-05	0.000256	0.000838	0.00031	0.000318	0.000162	0.000157	0.000182	0.000144	0.000285	0.000587	7.5e-05
Rhodococcus qingshengii	Bacteria	10.7527	0.000241	7.7e-05	0	0.00028	7e-06	2.5e-05	0.000329	0.000624	0.000575	0.000148	0.000336	0.000308	0.000661	0.000513	0	0	0
Urbifossiella limnaea	Bacteria	19.3548	0.000241	1.4e-05	0	1.1e-05	2.7e-05	9e-06	0	0.001831	0.000126	0.000429	4.8e-05	3.8e-05	7.3e-05	9.9e-05	8e-06	0.00117	2.5e-05
Plesiomonas shigelloides	Bacteria	34.4086	0.00024	6.5e-05	0.000484	3.9e-05	0.000233	0.000202	0.000586	6.2e-05	0.000277	0.000116	0.000367	0.000168	0.000135	0.000477	0.000253	0.000389	4.5e-05
Streptomyces marincola	Bacteria	29.0323	0.00024	0.000217	0.000118	9.2e-05	0.000136	1.1e-05	8.6e-05	0.001139	0.000175	0.000389	8.7e-05	5.3e-05	0.000188	0.00029	5.1e-05	0.000819	3.3e-05
Saccharothrix espanaensis	Bacteria	26.8817	0.00024	0.000211	1.3e-05	0.000102	1.4e-05	2.8e-05	0.000326	0.000997	0.000254	0.000398	7.9e-05	0.000271	4.8e-05	0.000201	8.4e-05	0.000792	4.1e-05
Streptomyces durmitorensis	Bacteria	34.4086	0.00024	0.000193	0.000133	0.000691	0.000248	6.7e-05	0.000107	0.00041	6.7e-05	0.000266	0.000213	6.5e-05	0.000224	0.000176	0.000176	0.000403	0.000376
Bacillus weihaiensis	Bacteria	34.4086	0.000239	0.000183	7.3e-05	0.000245	0.000221	0.000224	0.00041	0.000144	0.000376	0.00011	0.00037	0.000133	0.000246	0.000181	0.000245	0.000536	8e-05
Selenomonas sp. oral taxon 478	Bacteria	20.4301	0.000239	1.3e-05	0.00015	1.7e-05	0.000192	9.2e-05	4.9e-05	8.7e-05	0.001282	4.1e-05	0.00044	6.1e-05	0.000213	7e-05	0.000104	0.000916	3.6e-05
Fusobacterium varium	Bacteria	26.8817	0.000238	0.000514	5.2e-05	3.9e-05	4.8e-05	3.6e-05	0.000433	0.000644	0.000143	0.000287	0.000189	0.000162	0.000399	7.2e-05	0.000305	0	0.000466
Exiguobacterium mexicanum	Bacteria	16.129	0.000238	2.7e-05	7e-06	0	1.9e-05	3e-06	0	0.001742	0.000193	0.000448	2.3e-05	1.3e-05	8.7e-05	3.1e-05	7.4e-05	0.001182	0
Burkholderia vietnamiensis	Bacteria	17.2043	0.000238	1.4e-05	3.3e-05	0	1.3e-05	3.7e-05	0.000162	0.001407	0.000299	0.000419	5.2e-05	8.2e-05	8e-05	1.4e-05	0.000138	0.000967	0.000106
Actinomyces qiguomingii	Bacteria	29.0323	0.000237	0.000407	0.000144	0.000151	1.8e-05	0.000228	9.1e-05	0.000305	0.000543	0.000343	0.000129	0.000287	0.000385	6.9e-05	0.000386	0	0.000278
Geoalkalibacter subterraneus	Bacteria	25.8065	0.000237	3.4e-05	0.00012	0.000299	1e-05	0.00017	0.000874	0.000155	0.000207	9.8e-05	0.000379	4.5e-05	0.000128	0.00022	0.000116	0.0001	0.000799
Tetragenococcus halophilus	Bacteria	27.957	0.000237	6.4e-05	8.6e-05	0.00016	0.000853	0.00015	3.8e-05	3.9e-05	0.000463	0.000151	0.000325	0.000733	0.000159	0.000244	7.4e-05	0.00011	0.000134
Janibacter melonis	Bacteria	19.3548	0.000237	1.5e-05	3e-06	0.000123	3e-05	3e-06	0	0.001779	3.2e-05	0.000431	3.9e-05	4.3e-05	3.5e-05	7e-06	4.6e-05	0.001177	7.2e-05
Microcoleus vaginatus	Bacteria	22.5806	0.000237	0.000155	0.000111	8.5e-05	0.00013	0.0001	1.1e-05	1.7e-05	0.001246	8.8e-05	0.000389	0.000119	0.000108	0.000145	0.000116	0.000885	2.9e-05
Paenibacillus tritici	Bacteria	35.4839	0.000237	0.000378	0.000136	0.000217	5.9e-05	0.000339	0.000119	8.4e-05	0.000532	0.000277	0.000196	0.000188	0.000273	0.000431	0.000243	0.000246	6.1e-05
Brevibacterium linens	Bacteria	29.0323	0.000236	8.5e-05	4.6e-05	2.4e-05	7.2e-05	2e-06	0.000918	0.000303	0.000412	0.000152	0.000322	0.000181	0.000152	0.000241	6.4e-05	0.000136	0.000638
Leclercia sp. 29361	Bacteria	18.2796	0.000236	2e-06	0.000692	0.000136	0.000249	0.000307	0.00037	6.8e-05	0.000124	9.9e-05	0.000376	6.2e-05	0.000144	0.000527	2.1e-05	0.000614	7.1e-05
Paenibacillus cellulositrophicus	Bacteria	31.1828	0.000235	0.000248	0.000128	9e-05	0.000109	1.8e-05	0.000133	0.00068	0.000498	0.000265	0.000205	0.000213	0.000182	0.000296	0.000209	0.000445	7.3e-05
Streptomyces sp. MST-110588	Bacteria	31.1828	0.000235	0.000147	4e-05	0.000553	8e-06	0.000107	0.000334	0.000587	0.000102	0.000335	0.000133	5.6e-05	5.3e-05	0.00011	0.000438	0.000397	0.000331
Pseudomonas protegens	Bacteria	25.8065	0.000235	0.000145	6.6e-05	1.9e-05	2.2e-05	0.0001	2.2e-05	0.001494	9e-05	0.000412	5.4e-05	2.8e-05	9.9e-05	5.9e-05	7.7e-05	0.001021	9.1e-05
Frigoriglobus tundricola	Bacteria	17.2043	0.000235	1.5e-05	4e-05	8.6e-05	6e-06	1.1e-05	3.5e-05	0.00174	3.7e-05	0.00043	3.5e-05	6.1e-05	3.5e-05	2.5e-05	3e-05	0.00117	4.9e-05
Nocardioides sp. S-1144	Bacteria	30.1075	0.000234	0.000318	0.000145	0.00033	1.2e-05	4.3e-05	4.8e-05	0.000783	0.000228	0.000304	0.000163	0.000102	0.000401	3.2e-05	0.000155	0.00057	0.000114
Comamonas sp. NLF-7-7	Bacteria	16.129	0.000234	1.4e-05	0	0.000142	1.4e-05	0.000746	0.000135	0.000803	2.6e-05	0.000385	8e-05	0.00015	2.8e-05	7e-06	1.2e-05	0.001072	0.0001
Kosakonia sp. SMBL-WEM22	Bacteria	25.8065	0.000234	3.2e-05	0.000629	0.000233	0.000277	2e-05	0.000369	4.2e-05	0.000317	8.6e-05	0.000384	9.2e-05	0.000173	0.00056	6.1e-05	0.000413	0.000135
Frankia sp. ArI3	Bacteria	23.6559	0.000233	0.000342	7.3e-05	0.000678	7e-06	0.000121	4.2e-05	0.000593	1.4e-05	0.000385	7.8e-05	0.000312	0.000146	0.000583	5.2e-05	0.000324	3.2e-05
Bosea sp. F3-2	Bacteria	22.5806	0.000233	2.2e-05	7.5e-05	0	2.7e-05	8.4e-05	0.000311	0.001291	0.000116	0.000315	0.000149	0.000248	0.000108	5.5e-05	8e-05	0.000742	0.000143
Bradyrhizobium septentrionale	Bacteria	12.9032	0.000233	1.2e-05	4.2e-05	0	1.7e-05	2.3e-05	0.000113	0.001733	1.3e-05	0.00044	2e-05	1.7e-05	6.3e-05	1.3e-05	3e-05	0.001233	0
Schaalia sp. ZJ405	Bacteria	22.5806	0.000232	0.000311	0.00015	0.000163	1e-06	0.000292	4.5e-05	0.000554	0.000356	0.00035	0.000113	0.000167	0.000597	0.000109	0.00031	0	0.000193
Pseudomonas oryzihabitans	Bacteria	24.7312	0.000232	3.9e-05	3e-05	2.8e-05	3.6e-05	5e-05	9.5e-05	0.001555	0.0001	0.000381	8.1e-05	7.2e-05	0.000119	8.6e-05	3.3e-05	0.001026	2.9e-05
Janthinobacterium sp. 1_2014MBL_MicDiv	Bacteria	31.1828	0.000232	3.5e-05	7.3e-05	0.000155	3.2e-05	7.3e-05	0.00037	0.000989	0.000167	0.000296	0.000167	0.000196	0.000255	8.7e-05	0.000101	0.000684	4.9e-05
Roseomonas sp. S08	Bacteria	23.6559	0.000232	0.000259	2.8e-05	4.2e-05	4.6e-05	0.000266	0.00033	0.000728	0.000165	0.000335	0.000127	0.000292	9e-05	0.00029	3.1e-05	0.000629	7.3e-05
Streptomyces mobaraensis	Bacteria	18.2796	0.000232	0.000137	0.000413	0.000192	8.5e-05	0.000157	5.9e-05	0.000639	0.000237	0.000218	0.000246	0.000137	0.000403	6.6e-05	0.000291	0.000386	8e-05
Streptococcus pantholopis	Bacteria	29.0323	0.000232	0.000227	0.00015	0.000628	0.000364	3.8e-05	0.000165	5.3e-05	0.000201	0.000121	0.000345	0.000361	0.00022	6.5e-05	0.00044	0	0.000291
Mycobacteroides immunogenum	Bacteria	23.6559	0.000231	7.7e-05	0.000323	0.000297	3e-06	4.9e-05	0.0003	0.000184	0.000627	0.000186	0.000277	0.000174	0.000231	0.000447	0.000283	0.000271	4e-06
Calothrix sp. PCC 6303	Bacteria	16.129	0.000231	8e-06	0	0.000341	3e-05	3.8e-05	0.001004	0.000345	5e-05	0.000339	0.00012	0.000782	0.000169	3e-06	3.2e-05	0.000301	0.000102
Porphyromonas crevioricanis	Bacteria	31.1828	0.000231	0.000413	3.7e-05	0.000383	1.4e-05	0.000432	0.000306	0.000178	4.6e-05	0.000267	0.000193	0.000104	7.8e-05	0.000114	0.000289	0.000543	0.000233
Desulfitobacterium hafniense	Bacteria	33.3333	0.00023	7.8e-05	0.000264	0.000198	0.000359	8.7e-05	0.00013	0.000154	0.000573	0.000209	0.000252	0.000443	0.00027	0.00029	0.000189	3e-05	0.000182
Bradyrhizobium arachidis	Bacteria	20.4301	0.00023	1.8e-05	0.000105	7.3e-05	3e-06	7e-06	3.7e-05	0.00165	4.6e-05	0.000417	4e-05	5.9e-05	9.5e-05	2.5e-05	7e-05	0.001091	5e-06
Pseudomonas viridiflava	Bacteria	32.2581	0.00023	2.1e-05	0.000118	0.000159	2.2e-05	0.000153	0.000145	0.001033	0.000239	0.000355	0.000103	7.4e-05	0.000122	7.8e-05	0.000112	0.000774	0.000191
Cedecea sp. FDAARGOS_727	Bacteria	26.8817	0.000229	7e-05	0.000729	7e-05	0.000296	2.4e-05	0.000277	2.9e-05	0.000408	0.000117	0.000344	4.3e-05	0.00025	0.000498	0.000125	0.000376	0.000106
Clostridium formicaceticum	Bacteria	37.6344	0.000229	0.000308	8.5e-05	3.5e-05	9.2e-05	0.000491	9.9e-05	0.000282	0.000423	0.000239	0.00022	0.000194	0.00017	0.000372	0.000287	0.000324	4.5e-05
Streptomyces galilaeus	Bacteria	18.2796	0.000228	3.5e-05	1.7e-05	2e-05	9e-06	3.3e-05	0.000304	0.001432	3.7e-05	0.000437	1.4e-05	0.000272	3.5e-05	6e-06	3.1e-05	0.000977	2.1e-05
Ruminiclostridium herbifermentans	Bacteria	31.1828	0.000227	0.000319	0.000142	0.000108	0.000165	0.000252	0.00014	9.1e-05	0.000576	0.000239	0.000215	0.000324	0.000225	0.00035	0.000249	4.6e-05	0.00019
Streptomyces sp. GS7	Bacteria	33.3333	0.000227	9.1e-05	6.1e-05	0.000513	2.6e-05	0.000114	0.000387	0.000502	0.000119	0.000366	8.5e-05	0.000287	8.6e-05	7.3e-05	0.000161	0.000364	0.000378
Streptomyces formicae	Bacteria	23.6559	0.000227	0.000175	1.7e-05	2.8e-05	2.4e-05	8e-06	8.6e-05	0.001432	0.000112	0.000418	3.2e-05	5.6e-05	0.000102	0.000134	4.6e-05	0.000988	1.5e-05
Virgibacillus phasianinus	Bacteria	27.957	0.000227	8e-05	6.4e-05	7.3e-05	6.7e-05	9.9e-05	0.000163	1.6e-05	0.001207	9.4e-05	0.000362	8e-05	9.1e-05	0.000176	0.000192	0.000722	8.4e-05
Symbiobacterium thermophilum	Bacteria	27.957	0.000226	0.000567	0.00032	2.8e-05	2.2e-05	2.1e-05	4.8e-05	7.3e-05	0.000736	0.000159	0.000295	5.2e-05	0.00035	0.000551	0.00035	2.8e-05	5.7e-05
Pseudomonas fakonensis	Bacteria	25.8065	0.000226	4.3e-05	0.000234	0.000468	0.000401	0.000495	4e-06	0.000119	3.8e-05	0.000145	0.00031	5.5e-05	0.000487	9.8e-05	0.000133	0.000232	0.000325
Fretibacterium fastidiosum	Bacteria	26.8817	0.000225	5.4e-05	0.000169	2.8e-05	0.000982	7.4e-05	5.6e-05	3.8e-05	0.000376	0.000282	0.000168	0.000123	8.2e-05	0.000128	0.000829	6e-05	0.000112
Micromonospora echinaurantiaca	Bacteria	19.3548	0.000225	6.3e-05	4.1e-05	1.2e-05	3e-06	1.9e-05	0	0.001646	0.000105	0.000397	5e-05	1.6e-05	8.2e-05	8.6e-05	2.3e-05	0.001076	3.7e-05
Mycobacterium shinjukuense	Bacteria	29.0323	0.000225	0.000439	5.7e-05	7.3e-05	2.3e-05	3e-06	0.000748	0.00017	0.000255	0.000392	5.4e-05	0.000591	8.2e-05	0.000445	3.7e-05	0.000121	0.000125
Bradyrhizobium sp. 195	Bacteria	24.7312	0.000224	1.3e-05	0.000409	3.3e-05	0.00012	5e-06	6.7e-05	0.001172	8.5e-05	0.000277	0.00017	6.2e-05	5.8e-05	7.1e-05	0.000141	0.000791	0.000192
Haemophilus influenzae	Bacteria	26.8817	0.000224	4.8e-05	2.6e-05	0.000648	2.6e-05	2.3e-05	0.000682	0.000115	0.000185	7.4e-05	0.000378	8.7e-05	0.000219	0.000437	0.000486	0.0001	3.4e-05
Enterococcus wangshanyuanii	Bacteria	30.1075	0.000224	1.7e-05	6.8e-05	0.000235	0.00099	0.000111	7.1e-05	4.7e-05	0.000213	7.8e-05	0.000374	0.000818	0.000127	9.9e-05	8.1e-05	0.000137	0.000104
Leifsonia sp. 21MFCrub1.1	Bacteria	19.3548	0.000224	5.4e-05	6.8e-05	3.4e-05	9e-06	1.6e-05	0.000139	0.001461	8.8e-05	0.00038	6.4e-05	0.000124	9.5e-05	8e-06	0.000114	0.000944	2.5e-05
Lignipirellula cremea	Bacteria	29.0323	0.000224	1.3e-05	2.3e-05	0.000307	2.6e-05	0.000122	1.4e-05	0.001281	5.7e-05	0.000344	0.000101	2.5e-05	8.6e-05	7.5e-05	7.7e-05	0.000958	8.9e-05
Cupriavidus oxalaticus	Bacteria	33.3333	0.000224	2.3e-05	0.000267	0.000267	0.000102	0.000222	0.000441	0.000348	0.000137	0.00015	0.000299	0.000298	0.000199	5.1e-05	0.000212	0.000538	2.7e-05
Pseudoxanthomonas mexicana	Bacteria	13.9785	0.000223	1.5e-05	4.7e-05	2.2e-05	6e-06	1.8e-05	0	0.001751	2.6e-05	0.000402	4e-05	2.9e-05	4e-05	9e-06	3.7e-05	0.001146	4.1e-05
Paludibaculum fermentans	Bacteria	24.7312	0.000223	4.2e-05	9.7e-05	3.2e-05	1.3e-05	7e-06	7.1e-05	0.001477	0.000129	0.000367	7.6e-05	8.8e-05	8.2e-05	4e-05	0.000117	0.000928	5.3e-05
Arthrobacter alpinus	Bacteria	27.957	0.000223	0.000305	9.4e-05	9e-05	3.3e-05	0.000142	0.000121	0.000809	0.000217	0.00026	0.000185	0.000199	0.000228	5.2e-05	0.000267	0.000519	5e-05
Paenibacillus sp. FSL R5-0912	Bacteria	30.1075	0.000222	0.000196	0.000127	0.000182	7.7e-05	5.2e-05	0.000342	0.000675	0.00015	0.000321	0.000122	0.000235	0.000161	0.000246	0.000128	0.000553	1.5e-05
Amycolatopsis acidiphila	Bacteria	26.8817	0.000222	6e-05	0.000253	7.4e-05	6.1e-05	0.00023	6e-05	0.000644	0.000435	0.000242	0.000201	0.00012	0.00048	0.000152	0.000168	0.000242	0.000155
Marivirga tractuosa	Bacteria	20.4301	0.000221	3.1e-05	7e-06	0.000574	7e-06	6e-06	0.001021	4.1e-05	3e-05	0.000138	0.000305	6.1e-05	0.000427	1.6e-05	0.000779	0	7e-06
Streptosporangium roseum	Bacteria	24.7312	0.000221	0.000166	1.2e-05	3.2e-05	9e-06	7e-06	0.000199	0.001197	0.000192	0.000365	7.4e-05	5.6e-05	4.9e-05	0.000144	0.000147	0.000825	8.4e-05
Clostridium isatidis	Bacteria	29.0323	0.000221	0.000348	0.000332	0.000158	6.5e-05	7.4e-05	0.000191	0.000185	0.00043	0.000214	0.000228	0.000344	0.000271	0.000238	0.000312	0	0.000169
Terribacillus aidingensis	Bacteria	37.6344	0.000221	0.000261	0.0002	0.000172	0.000191	0.00021	0.0001	6.4e-05	0.00055	0.000232	0.000209	0.000411	0.000168	0.000181	0.000226	0.000176	0.000167
Caldicellulosiruptor kronotskyensis	Bacteria	24.7312	0.00022	0.000894	4.4e-05	7e-06	1.4e-05	0.000133	0.000511	0	0.000111	0.000287	0.000152	0.000424	2e-05	5.6e-05	0.000269	0.000481	6.2e-05
Shewanella algae	Bacteria	31.1828	0.00022	3.1e-05	7.9e-05	0.000263	0.00021	5.8e-05	0.000159	0.000365	0.000584	9.8e-05	0.000345	0.000107	0.00027	0.000373	0.000195	0.000384	3e-06
Maribacter cobaltidurans	Bacteria	15.0538	0.00022	0.000338	6e-06	0.001259	8e-06	4e-06	2.1e-05	9e-06	5.8e-05	1.6e-05	0.000428	1.6e-05	0.000249	3.3e-05	4.6e-05	0.000937	0
Alkalibacter sp. ES005	Bacteria	29.0323	0.000219	0.000296	0.00023	6e-05	0.000107	0.000131	0.000154	0.000125	0.000644	0.000248	0.000189	0.000228	0.000277	0.000311	0.000357	0	0.000153
Bifidobacterium coryneforme	Bacteria	29.0323	0.000219	0.00021	0.000261	0.000411	0.000226	9.9e-05	0.00018	0.000347	3.3e-05	0.000137	0.000302	1.6e-05	0.000223	0.000481	4.9e-05	0.000356	0.000206
Selenomonas sp. oral taxon 126	Bacteria	27.957	0.000218	4.1e-05	0.0001	0.000216	5.9e-05	0.000115	0	7e-05	0.001115	0.00011	0.000329	0.0001	0.000213	7.3e-05	0.000165	0.000605	0.000129
Lactobacillus amylolyticus	Bacteria	22.5806	0.000218	0.001198	0.000152	4.2e-05	4e-05	1e-05	0	0.000231	6.4e-05	9.8e-05	0.000341	4e-05	0.000169	3.5e-05	0.000988	0	4.5e-05
Carboxydothermus hydrogenoformans	Bacteria	27.957	0.000218	0.000104	8e-06	0.000577	0.000195	7.5e-05	0.000244	0.000125	0.000371	0.000203	0.000233	0.00019	0.000144	8.3e-05	6.6e-05	0.000442	0.000361
Corallococcus macrosporus	Bacteria	31.1828	0.000217	2e-05	0.000156	0.000595	1.8e-05	0.000122	0.000461	0.00026	9.9e-05	0.000331	0.000101	0.000411	0.0001	4.2e-05	0.000258	0.000305	0.000176
Mammaliicoccus sciuri	Bacteria	39.7849	0.000216	0.000102	0.0002	0.000256	0.000224	0.000346	0.000112	4.6e-05	0.000422	0.000165	0.000267	0.000211	9.7e-05	0.000201	0.000345	0.000272	0.000166
Pantoea agglomerans	Bacteria	40.8602	0.000216	7.9e-05	0.000235	0.000251	0.000103	0.000122	0.000342	0.000196	0.000398	0.000194	0.000237	0.000292	0.000194	0.000215	0.000216	0.000212	0.000169
Streptomyces sp. Mg1	Bacteria	19.3548	0.000215	3e-05	3.3e-05	2.7e-05	2.4e-05	3e-06	0	0.001382	0.000293	0.000341	8.7e-05	2.7e-05	4.4e-05	3.5e-05	2.9e-05	0.00112	4e-06
Paenibacillus sp. PK3_47	Bacteria	31.1828	0.000215	0.000282	0.00011	0.000201	9.8e-05	3.4e-05	0.000127	9.5e-05	0.000749	0.000196	0.000236	0.000198	0.000295	0.00031	0.000442	2.8e-05	3.1e-05
Succinivibrio dextrinosolvens	Bacteria	34.4086	0.000215	0.000156	0.00011	0.000174	0.000172	0.000273	0.000109	0.000405	0.000323	0.000235	0.000195	0.000326	0.000355	0.000105	0.000306	0.000127	6.6e-05
Formosa sp. Hel1_31_208	Bacteria	31.1828	0.000215	0.000331	5.1e-05	0.000614	3.3e-05	8.1e-05	0.000255	8.9e-05	0.00023	0.000216	0.000214	0.000295	0.00016	7.3e-05	8.5e-05	0.000479	0.000186
Ruminiclostridium cellulolyticum	Bacteria	30.1075	0.000215	0.000216	0.000126	0.000143	2.3e-05	3.1e-05	0.000603	6.8e-05	0.000481	0.00028	0.000148	0.00059	0.000217	0.000171	0.000273	0	5.4e-05
Paenibacillus ihbetae	Bacteria	31.1828	0.000214	0.000217	0.000533	0.000158	0.000122	9.7e-05	0.00017	0.000147	0.000317	0.000155	0.000275	0.000346	0.000353	0.000222	0.00022	8.1e-05	7.3e-05
Streptomyces vietnamensis	Bacteria	22.5806	0.000214	1.8e-05	3.2e-05	5e-06	6e-06	2.2e-05	0.000696	0.00093	3.5e-05	0.000231	0.000197	1.7e-05	4.3e-05	4e-06	0.000537	0.000617	2.9e-05
Paenibacillus physcomitrellae	Bacteria	34.4086	0.000214	0.00025	0.000228	0.000241	0.000311	8e-05	0.000256	7e-05	0.000267	0.000168	0.000261	0.000408	0.000235	0.00021	0.000239	2.7e-05	0.000178
Actinoplanes teichomyceticus	Bacteria	27.957	0.000214	0.000583	5e-06	0.00018	2.1e-05	0.00014	9e-06	0.000299	0.000448	0.000217	0.000211	4.2e-05	6.5e-05	0.00047	0.000161	0.000558	1e-05
Streptococcus respiraculi	Bacteria	30.1075	0.000214	9.2e-05	0.000186	0.000135	0.000411	0.000178	0.000218	0.000112	0.000367	0.000224	0.000204	0.000407	0.00016	0.000185	0.000151	8.1e-05	0.00031
Keratinibaculum paraultunense	Bacteria	32.2581	0.000214	0.000106	0.000267	4.5e-05	0.000287	0.000241	0.000173	0.000186	0.000413	0.000233	0.000194	0.000125	0.000199	6.4e-05	0.000441	0.000131	0.000298
Fructilactobacillus sanfranciscensis	Bacteria	31.1828	0.000214	4.1e-05	0.000121	0.000221	0.000209	0.000279	0.000157	0.000535	0.000157	0.000143	0.000286	0.000188	0.000301	5.4e-05	0.000528	0.000128	6.1e-05
Tannockella kyphosi	Bacteria	31.1828	0.000213	0.000287	6.7e-05	0.000124	0.000286	0.000107	6.9e-05	7e-05	0.000661	0.000195	0.000232	0.000375	0.000355	0.000292	0.000215	1.2e-05	5.2e-05
Rhizobium etli	Bacteria	25.8065	0.000213	7.8e-05	7.6e-05	9.5e-05	3.5e-05	1.4e-05	2e-05	0.001276	0.000177	0.000347	7.6e-05	0.000103	8e-05	9.8e-05	8.3e-05	0.000838	5.5e-05
Atribacter laminatus	Bacteria	25.8065	0.000213	0.000119	0.000252	0.000277	0.000199	0.000113	0.000371	2.1e-05	0.000341	0.000122	0.000305	2.5e-05	9.7e-05	0.000171	0.000353	0.00029	0.000324
Roseomonas haemaphysalidis	Bacteria	23.6559	0.000213	1.5e-05	1.1e-05	0.000119	7e-06	1.1e-05	2.5e-05	0.001541	5e-05	0.000342	8.1e-05	5.6e-05	0.000188	3.2e-05	1.2e-05	0.000939	1.6e-05
Bacillus sp. PAMC26568	Bacteria	34.4086	0.000212	0.000332	0.000163	0.000241	3.2e-05	0.000167	0.000215	0.000327	0.000223	0.000216	0.000209	0.00021	3.2e-05	0.000147	0.000457	0.000246	0.000173
Bacillus paralicheniformis	Bacteria	33.3333	0.000212	9.1e-05	0.000237	0.000192	0.000291	1.8e-05	0.000157	9.6e-05	0.000612	0.000234	0.00019	0.000321	0.000239	0.000381	0.000186	9.7e-05	7.8e-05
Rhizobacter sp. AJA081-3	Bacteria	23.6559	0.000212	1.3e-05	3.3e-05	0.000363	3.1e-05	1.3e-05	0.000241	0.000965	7.2e-05	0.000366	5.5e-05	0.000212	5.5e-05	0.000349	2.4e-05	0.00058	7e-05
Petrocella atlantisensis	Bacteria	32.2581	0.000212	0.000179	0.00023	0.000116	7.8e-05	0.000131	0.000202	0.000234	0.00053	0.000263	0.00016	0.000272	0.000171	0.000317	0.000285	0.000153	9e-05
Rubrivivax gelatinosus	Bacteria	25.8065	0.000212	0.000877	2.5e-05	4.5e-05	2.2e-05	8e-06	2.9e-05	0.000594	9.3e-05	0.000166	0.000258	5.7e-05	6.2e-05	0.000149	1.4e-05	0.000364	0.000608
Bosea sp. RAC05	Bacteria	24.7312	0.000212	5.9e-05	8e-06	2.5e-05	1.4e-05	6.8e-05	6.1e-05	0.001181	0.000324	0.000339	8.1e-05	9.1e-05	0.000132	0.000132	8.5e-05	0.000793	1.9e-05
Pyramidobacter piscolens	Bacteria	29.0323	0.000211	0.000165	0.000199	7.7e-05	3.4e-05	1e-05	4.5e-05	0.000554	0.000634	0.000202	0.000221	9.7e-05	0.000445	5.2e-05	0.000358	0.000159	0.000131
Pseudomonas alcaligenes	Bacteria	26.8817	0.000211	1.3e-05	0.000103	0.000114	0.000175	1e-05	9.6e-05	0.000969	0.000253	0.000265	0.000156	0.000129	0.000189	0.000108	2.2e-05	0.000615	0.000185
Mucilaginibacter mallensis	Bacteria	20.4301	0.000209	0.000896	2.9e-05	0.000543	6e-06	7e-06	4e-06	8.7e-05	6e-05	0.000375	3.9e-05	4.4e-05	5.8e-05	2.1e-05	1.5e-05	0.001068	1.4e-05
Acidipropionibacterium virtanenii	Bacteria	19.3548	0.000208	0.000125	6e-06	3.4e-05	3e-06	5.6e-05	0.001328	2.5e-05	4.1e-05	4e-05	0.00038	4.5e-05	4.2e-05	1.6e-05	8.6e-05	0	0.001027
Actinomyces lilanjuaniae	Bacteria	25.8065	0.000208	0.000367	5.3e-05	5.2e-05	2e-06	0.00042	2.8e-05	0.000266	0.000455	0.000346	6.7e-05	0.000164	0.000224	0.000237	0.000371	0.000114	0.00014
Mycobacterium kubicae	Bacteria	29.0323	0.000207	2.1e-05	0.000252	0.000211	1.3e-05	2.7e-05	0.000127	0.000825	0.000243	0.00029	0.000123	0.000114	0.000162	7.9e-05	0.00024	0.000544	8.3e-05
Denitratisoma sp. DHT3	Bacteria	25.8065	0.000207	0.000271	0.000171	0.000118	0.000225	0.000408	0.000319	7.7e-05	5.2e-05	0.000245	0.000169	0.000213	0.000159	0.000237	0.000244	0.000297	9.8e-05
Staphylococcus nepalensis	Bacteria	26.8817	0.000207	0.00023	0.000279	6.4e-05	8.7e-05	3.6e-05	0.000599	1.9e-05	0.000338	0.00028	0.000132	0.0004	6.2e-05	0.000214	0.000208	0.000116	0.000253
Turicibacter sp. TJ11	Bacteria	26.8817	0.000207	7.6e-05	0.00019	0.000118	0.000173	0.000137	0.000147	0.000423	0.000406	0.000238	0.000175	0.000332	0.000259	0.000237	0.000162	0.000208	5.5e-05
Paracoccus yeei	Bacteria	20.4301	0.000206	4.6e-05	6.5e-05	0.000122	3.1e-05	2.5e-05	7.6e-05	0.000924	0.000398	0.000234	0.000178	0.000121	2.3e-05	4.4e-05	0.000129	0.000874	2.1e-05
Staphylococcus pseudintermedius	Bacteria	30.1075	0.000206	1.9e-05	0.000485	9.5e-05	0.000199	1.8e-05	7.8e-05	0.000322	0.000489	0.000256	0.000155	0.000133	0.000143	0.000453	3.1e-05	2.4e-05	0.00048
Rothia amarae	Bacteria	27.957	0.000206	2.9e-05	7.6e-05	0.00024	1e-06	1.1e-05	0.000833	0.000288	0.000153	0.000148	0.000265	7.6e-05	0.000189	4.7e-05	0.000172	9.8e-05	0.000625
Dehalobacterium formicoaceticum	Bacteria	30.1075	0.000206	0.00014	0.000328	0.000108	0.000115	2.9e-05	8.3e-05	0.000315	0.000556	0.000263	0.000147	0.000166	0.000256	0.000256	0.000271	0.000172	0.000117
Coriobacterium glomerans	Bacteria	30.1075	0.000205	0.000138	0.000346	2.1e-05	0.000288	0.000238	8.1e-05	0.000244	0.000314	0.000146	0.000265	0.000298	0.00028	0.000119	0.000269	3.2e-05	0.000228
Herbaspirillum huttiense	Bacteria	25.8065	0.000204	0.000223	0.000188	0.000501	0.000428	4.6e-05	9.8e-05	1e-05	0.000122	0.000117	0.000293	9.4e-05	0.000234	0.000471	0.000153	0.000113	0.000188
Desulfosporosinus meridiei	Bacteria	32.2581	0.000204	0.000221	0.000174	8.4e-05	0.000202	0.000207	4.3e-05	0.000139	0.000554	0.000229	0.00018	0.000349	0.000206	0.000203	0.000245	6.4e-05	0.000168
Aeromonas salmonicida	Bacteria	23.6559	0.000204	2e-05	0.000452	0.000103	7.6e-05	1.5e-05	0.000775	0.000171	6e-05	0.000183	0.000225	0.00047	2.9e-05	0.000284	5.1e-05	0.00039	2.7e-05
Cellulomonas sp. JZ18	Bacteria	26.8817	0.000204	0.000162	6.5e-05	2.8e-05	2.8e-05	1.8e-05	0.000862	0.000326	0.00013	0.00013	0.000279	0.00011	0.000171	2.5e-05	8.4e-05	0.000189	0.000616
Laceyella sacchari	Bacteria	27.957	0.000204	1.4e-05	2.3e-05	0.000164	3.2e-05	0.000148	0.001082	4.8e-05	7.7e-05	7.6e-05	0.000335	5.8e-05	0.000939	2.5e-05	2.9e-05	8.3e-05	6e-05
Viridibacillus sp. JNUCC-6	Bacteria	27.957	0.000204	0.000837	0.000168	0.000263	9.7e-05	6.7e-05	1.9e-05	1.2e-05	0.000145	0.000153	0.000255	2.3e-05	0.000314	0.000283	0.000111	4.3e-05	0.000448
Microbacterium hominis	Bacteria	25.8065	0.000204	0.000169	0.000107	0.000122	0.000121	0.000227	0.000191	0.000211	0.000467	0.000183	0.000225	0.000367	0.000274	0.000163	0.000226	0.00012	7.7e-05
Fenollaria massiliensis	Bacteria	25.8065	0.000203	0.000256	6.7e-05	0.000111	2.5e-05	0.000216	7.5e-05	0.000393	0.000478	0.000341	6.3e-05	0.000212	0.000357	8.9e-05	0.000416	0	0.000132
Streptococcus iniae	Bacteria	32.2581	0.000203	0.000261	0.000119	0.000213	0.000548	4.4e-05	7.5e-05	5.9e-05	0.00028	0.000177	0.00023	0.000442	8.9e-05	0.00033	0.000141	2.2e-05	0.000224
Selenomonas ruminantium	Bacteria	30.1075	0.000203	5.8e-05	0.00015	6.7e-05	8.3e-05	6.2e-05	0.000202	0.000696	0.000337	0.000245	0.00016	0.000111	0.000129	0.00016	0.000271	0.000399	0.000137
Prevotella sp. oral taxon 299	Bacteria	24.7312	0.000203	0.0001	2e-05	0.000713	3.2e-05	2e-06	6.8e-05	0.000448	0.00023	0.000238	0.000166	6.5e-05	0.000111	9.2e-05	0.000136	0.000336	0.000453
Microbacterium sp. Y-01	Bacteria	21.5054	0.000202	1.6e-05	2.9e-05	0.000134	5e-06	2.4e-05	0.000318	0.000901	0.000221	0.000306	9.7e-05	0.000182	0.000239	3e-06	7.4e-05	0.00059	9.9e-05
Marinicauda algicola	Bacteria	31.1828	0.000202	0.000199	0.000141	0.000624	0.000166	0.000156	0.00011	4.5e-05	0.000154	0.000128	0.000278	0.000151	0.000268	0.000335	0.000161	0.000273	4e-05
Pseudonocardia dioxanivorans	Bacteria	23.6559	0.000202	3.3e-05	0.0001	1.6e-05	2.4e-05	2e-05	1.8e-05	0.001382	0.000106	0.000359	4.2e-05	5.7e-05	0.000105	5e-05	7.9e-05	0.000883	1.2e-05
Streptococcus parauberis	Bacteria	29.0323	0.000202	7.3e-05	0.000173	0.000267	0.000471	7.1e-05	9.9e-05	5e-05	0.000396	0.000158	0.000247	0.00043	0.000176	0.000164	0.000109	0	0.000344
Streptomyces nodosus	Bacteria	27.957	0.000202	2.5e-05	0.000146	0.000119	7e-06	0.000125	0.000868	0.000131	0.000181	6.8e-05	0.000338	6e-05	0.00019	1.2e-05	0.000135	0.000108	0.000675
Bacillus vallismortis	Bacteria	22.5806	0.000202	5.8e-05	0.000986	1.9e-05	4.6e-05	4e-06	0	0.000583	8.2e-05	0.000374	2.6e-05	4.9e-05	1.3e-05	4.6e-05	2.4e-05	0.000427	0.000623
Thermanaerosceptrum fracticalcis	Bacteria	32.2581	0.000202	0.00016	9.9e-05	0.000554	0.0001	0.000211	0.000172	6.9e-05	0.000219	0.00019	0.000213	0.00013	0.000123	0.00061	5.4e-05	0.000271	6.8e-05
Sphingomonas sp. DM2-R-LB4	Bacteria	23.6559	0.000201	6e-06	0.000143	1.6e-05	0.000306	2.5e-05	9.7e-05	0.001021	5.7e-05	0.000272	0.00013	9.1e-05	0.000409	1.4e-05	0.000111	0.000549	4e-06
Nocardioides ungokensis	Bacteria	16.129	0.000201	6e-05	4e-06	0	5e-06	3.8e-05	2.5e-05	0.001427	0.00012	0.000364	3.4e-05	3.5e-05	9.6e-05	3.7e-05	3.9e-05	0.000943	2.6e-05
Actinoplanes derwentensis	Bacteria	25.8065	0.000201	4.6e-05	3.3e-05	0.000128	1.5e-05	9e-06	9.2e-05	0.001211	0.000131	0.000299	0.000101	9.3e-05	7.3e-05	2.6e-05	7.4e-05	0.000839	7.3e-05
Nocardioides sp. zg-579	Bacteria	19.3548	0.000201	3.8e-05	3.6e-05	0.000147	1e-05	1.1e-05	6e-06	0.00138	5.2e-05	0.000379	2e-05	1.8e-05	7.3e-05	9e-06	0.000153	0.000913	5e-06
Sporosarcina ureilytica	Bacteria	21.5054	0.000201	5.7e-05	8.8e-05	1.1e-05	2.3e-05	3e-06	0.001119	1.5e-05	0.000257	0.000192	0.00021	0.000365	0.000604	0.000117	0.0001	0	1.9e-05
Desulfonema limicola	Bacteria	29.0323	0.0002	5.5e-05	8.9e-05	0.000165	0.000775	0.000102	0.000136	4.9e-05	0.000199	0.000103	0.0003	9.7e-05	0.00064	0.000171	0.000159	9.2e-05	3.3e-05
Streptomyces griseocarneus	Bacteria	25.8065	0.0002	0.000228	3.3e-05	0.00012	0.000169	7e-06	2.9e-05	0.000946	0.000103	0.000293	0.000104	4.6e-05	0.000175	0.000248	1.2e-05	0.000695	2e-05
Labrys sp. KNU-23	Bacteria	24.7312	0.0002	1.2e-05	4.7e-05	2.8e-05	1.1e-05	0.000551	2.6e-05	0.000915	4.3e-05	0.000345	5.2e-05	2.5e-05	7.2e-05	1.4e-05	0.000383	0.000614	5.8e-05
Candidatus Aquiluna sp. UB-MaderosW2red	Bacteria	27.957	0.0002	0.000455	8.9e-05	0.00053	2.3e-05	0.000122	2.2e-05	0.000141	0.000192	0.000276	0.000122	5.2e-05	4.8e-05	0.000246	0.000362	8.4e-05	0.000404
Lentilactobacillus buchneri	Bacteria	26.8817	0.000199	3.6e-05	0.000155	0.000137	1.7e-05	4.3e-05	0.000164	0.000944	0.000155	0.000284	0.000114	0.000128	0.000126	7.6e-05	0.000101	0.000677	6.9e-05
Chryseobacterium sp. SNU WT5	Bacteria	21.5054	0.000199	1.7e-05	1.1e-05	0.00011	2.9e-05	3e-06	0.000918	0.000442	5.2e-05	0.000356	3.9e-05	0.000762	6.8e-05	0.000222	1.1e-05	0.000134	3.6e-05
Microlunatus elymi	Bacteria	35.4839	0.000199	0.00023	8.9e-05	0.000691	1.3e-05	8.1e-05	7.9e-05	0.000262	0.000135	0.000285	0.000111	8.4e-05	0.000162	0.000177	0.000304	0.000171	0.000288
Myroides odoratus	Bacteria	26.8817	0.000199	0.000634	3.8e-05	0.000212	6e-05	0.000192	0.000157	6e-06	0.000253	0.000143	0.000256	0.000138	7.8e-05	7.8e-05	0.000151	0.000111	0.000621
Methylobacterium sp. WL1	Bacteria	19.3548	0.000199	1.9e-05	0.000125	0.000157	6e-06	1.4e-05	0.000249	0.001023	5.6e-05	0.00029	0.000106	0.000149	0.000163	4.7e-05	8.7e-05	0.000726	0
Streptococcus ferus	Bacteria	27.957	0.000199	9.7e-05	0.000104	0.000175	0.000441	7.9e-05	0.000147	0.000114	0.000412	0.00016	0.000238	0.000424	0.000165	0.000178	0.000108	2.1e-05	0.000308
Sutterella faecalis	Bacteria	20.4301	0.000199	1.7e-05	0.000291	0.000279	1e-05	0.000241	0.00043	0.00031	3.6e-05	9e-05	0.00031	9.9e-05	7.6e-05	6e-06	0.000453	0.000178	0.000349
Corynebacterium ureicelerivorans	Bacteria	24.7312	0.000198	9.4e-05	0.00027	5.3e-05	0.00059	3.4e-05	0.000226	0.000192	0.000139	0.000296	9.9e-05	0.000171	0.000214	8.1e-05	0.000638	2.5e-05	4.5e-05
Chitinophaga pinensis	Bacteria	34.4086	0.000198	0.000221	2.7e-05	0.000441	1.8e-05	0.000141	0.000141	0.000447	0.000143	0.000242	0.000153	0.000235	0.000297	6.5e-05	0.000109	0.000351	0.000118
Microbacterium cremeum	Bacteria	20.4301	0.000198	1.8e-05	0.000159	9e-06	7e-06	6.1e-05	1e-05	0.001366	4.6e-05	0.00035	4.3e-05	1.8e-05	5e-05	2.1e-05	0.000111	0.000951	5e-06
Rhizobacter gummiphilus	Bacteria	34.4086	0.000198	0.000306	7.3e-05	0.000112	1.2e-05	0.000375	8.2e-05	0.0005	0.000129	0.000303	9.1e-05	0.000203	0.000135	0.00016	0.000299	0.000293	9.5e-05
Methylobacterium mesophilicum	Bacteria	22.5806	0.000198	4e-06	8.2e-05	0.000168	3e-06	8e-06	0.000239	0.000796	0.000316	0.000299	9.4e-05	9.1e-05	0.000236	2.5e-05	7.7e-05	0.000532	0.0002
Draconibacterium orientale	Bacteria	33.3333	0.000198	6e-06	0.000183	0.000474	2.7e-05	0.00042	0.00011	0.000232	0.000129	9e-05	0.000308	0.000143	9.8e-05	0.000277	7.2e-05	0.000343	0.000258
Hydrogenophaga sp. YM1	Bacteria	23.6559	0.000198	1.9e-05	2e-05	0.000103	8e-06	8.2e-05	7e-05	0.001035	0.000284	0.000311	8.1e-05	7.9e-05	0.000123	3.8e-05	7.7e-05	0.000726	0.000114
Thermoanaerobacterium thermosaccharolyticum	Bacteria	29.0323	0.000197	0.000138	0.000144	0.000247	8.5e-05	7e-05	0.000194	5.2e-05	0.000626	0.000156	0.000239	0.000265	0.000205	0.000299	0.000193	0.000161	7.7e-05
Pseudonocardia sp. CGMCC 4.1532	Bacteria	30.1075	0.000197	0.000495	0.000119	7.4e-05	0.00047	1.4e-05	0.000109	0.00013	0.000146	0.000171	0.000223	8.8e-05	0.000397	0.000391	0.000229	7.3e-05	2.1e-05
Actinoplanes friuliensis	Bacteria	24.7312	0.000197	7.6e-05	0.000123	0.000309	1.6e-05	1.3e-05	1.1e-05	0.001022	6.1e-05	0.000304	8.8e-05	6.8e-05	0.000154	1.6e-05	0.000172	0.000702	3.8e-05
Paenibacillus albus	Bacteria	35.4839	0.000197	6.2e-05	0.000159	0.000245	0.000295	0.000132	0.000131	0.000164	0.000377	0.000133	0.000261	0.000213	0.000237	0.000167	0.000298	0.000107	0.000155
Caloramator sp. E03	Bacteria	29.0323	0.000196	0.000251	0.000257	0.000264	2.3e-05	3.2e-05	0.000131	7.1e-05	0.000539	0.00024	0.000151	0.000156	0.000342	0.000243	0.000245	8.1e-05	0.000114
Bacillus sp. BD59S	Bacteria	33.3333	0.000196	0.000217	8.5e-05	0.000447	0.000132	0.000252	0.000238	4e-06	0.000157	0.000156	0.000237	3.8e-05	0.000264	0.000292	0.000117	0.000399	6.8e-05
Hymenobacter sp. 5116S-27	Bacteria	32.2581	0.000196	0.000209	4.6e-05	0.000709	4e-06	8.8e-05	0.000308	8.3e-05	8.3e-05	0.000106	0.000287	0.000172	0.000271	7.1e-05	0.000129	0.000367	0.000146
Raoultella terrigena	Bacteria	16.129	0.000195	5e-06	0.00027	1.3e-05	0.000105	2.6e-05	0.000233	0.000947	3.8e-05	0.000223	0.000167	9.7e-05	7.8e-05	0.000198	4e-05	0.000726	2.6e-05
Streptomyces cattleya	Bacteria	19.3548	0.000194	3e-05	1.7e-05	0	1.3e-05	5e-06	1e-05	0.001503	5.8e-05	0.000369	1.6e-05	1.9e-05	6.7e-05	1.4e-05	2.9e-05	0.001	5e-06
Actinomadura graeca	Bacteria	25.8065	0.000194	6.5e-05	4.8e-05	0.000111	3.5e-05	1.8e-05	8e-06	0.001098	0.000224	0.000311	7.6e-05	6.3e-05	8.8e-05	0.000129	6.2e-05	0.000746	6.3e-05
Acidipropionibacterium acidipropionici	Bacteria	20.4301	0.000194	6.3e-05	4.5e-05	0.000187	5e-06	1.4e-05	0.001022	0.000108	7.8e-05	5e-05	0.000342	4.6e-05	0.000115	1.6e-05	5.7e-05	0.000108	0.000794
Nostoc linckia	Bacteria	29.0323	0.000194	0.000314	1.1e-05	0.00022	0.000203	0.00016	0.00018	0.000423	3.2e-05	0.000236	0.000151	0.00013	0.000231	0.000293	1.1e-05	0.000334	0.000176
Paenibacillus sp. N3/727	Bacteria	26.8817	0.000194	0.000577	3.5e-05	9e-06	1.9e-05	0.000108	0.000123	3.5e-05	0.000608	0.000244	0.000143	8e-05	0.000198	0.000513	0.000206	0.000101	0.0001
Caldicellulosiruptor owensensis	Bacteria	32.2581	0.000194	0.00015	0.00013	0.000141	3e-06	0.000304	0.000424	0.000216	0.000175	0.000124	0.000266	7.5e-05	0.000151	0.000317	0.000322	0.000267	4.1e-05
Sphingomonas ginsengisoli An et al. 2013	Bacteria	18.2796	0.000194	1.8e-05	1e-05	0	5e-06	5e-06	8e-06	0.001496	8.7e-05	0.000366	1.8e-05	6e-06	4.2e-05	4e-05	4e-05	0.000985	1.9e-05
Nonomuraea coxensis	Bacteria	24.7312	0.000194	5.4e-05	0.000123	1.9e-05	1.2e-05	4.5e-05	8.8e-05	0.001007	0.000259	0.000318	6.7e-05	0.000103	0.000142	9.9e-05	8.7e-05	0.000636	7.8e-05
Crassaminicella profunda	Bacteria	36.5591	0.000194	0.000161	0.00019	0.000238	3e-05	0.000168	0.00021	8.5e-05	0.000458	0.000228	0.000159	0.00013	0.000287	0.000263	0.000373	3.5e-05	7.8e-05
Dolosigranulum pigrum	Bacteria	32.2581	0.000194	0.000309	0.000313	0.000265	0.000121	2.1e-05	0.000181	7.4e-05	0.000275	0.000221	0.000165	0.000251	0.000152	0.000194	0.000315	6.1e-05	0.000193
Miltoncostaea marina	Bacteria	17.2043	0.000193	2.5e-05	5.5e-05	0	5e-06	1e-05	0	0.001488	4.7e-05	0.000365	1.7e-05	1e-05	2.8e-05	2.1e-05	5.1e-05	0.001011	6e-06
Marinobacter nauticus	Bacteria	21.5054	0.000193	0.000267	4e-06	0.000177	7.7e-05	0.0007	0.00019	4e-06	7.9e-05	0.000107	0.000281	0.000102	0.000202	5.8e-05	6.7e-05	0.000703	5e-06
Achromobacter denitrificans	Bacteria	29.0323	0.000193	4.4e-05	9.8e-05	0.000283	3e-06	0.000263	0.000419	0.000238	0.000182	0.000244	0.00014	0.000408	9.5e-05	2.8e-05	0.000134	0.00015	0.000336
Sphingomonas sanguinis	Bacteria	21.5054	0.000193	2e-06	0.000103	0.000154	8e-06	2.8e-05	0.000261	0.000862	0.000167	0.000275	0.000109	0.000182	0.000153	7e-06	0.000212	0.000519	6.1e-05
Nostoc sp. TCL26-01	Bacteria	33.3333	0.000193	0.000231	0.000221	0.00033	0.000121	0.000193	0.000113	0.00022	0.00012	0.000116	0.000271	9.7e-05	0.000307	0.000175	0.000163	0.000279	0.000127
Photobacterium damselae	Bacteria	36.5591	0.000193	0.00018	5.9e-05	0.000139	7.3e-05	0.000166	0.000128	0.000564	0.000241	0.000188	0.000198	0.000264	7.7e-05	0.000129	0.000331	0.000301	5e-05
Niallia sp. Man26	Bacteria	31.1828	0.000192	5.6e-05	8.8e-05	6.4e-05	0.000477	1.3e-05	0.000146	0.000526	0.000179	0.000103	0.000284	0.000136	0.000343	7.5e-05	0.000102	0.000454	2.6e-05
Bradyrhizobium sp. A19	Bacteria	17.2043	0.000192	1e-05	7.9e-05	7e-06	3e-06	7e-06	9.3e-05	0.001406	1.3e-05	0.000351	3e-05	7.1e-05	5.9e-05	4e-06	4.7e-05	0.000925	1.5e-05
Alicycliphilus denitrificans	Bacteria	22.5806	0.000192	4.1e-05	0.000201	8.3e-05	3.1e-05	0.000558	0.000145	0.000279	0.000203	0.000241	0.000142	0.000161	5.7e-05	5.9e-05	0.000157	0.000619	7.9e-05
Amniculibacterium sp. G2-70	Bacteria	19.3548	0.000191	2.5e-05	1.4e-05	0.000115	3.5e-05	2e-06	0	0.001258	0.00014	0.000335	4.5e-05	8.2e-05	5.9e-05	4.5e-05	4.5e-05	0.000803	8.9e-05
Aeromonas media	Bacteria	23.6559	0.000191	6.5e-05	9e-05	6.8e-05	5e-06	1.1e-05	0.000111	0.000328	0.000847	7.4e-05	0.000311	0.000134	2.4e-05	7e-05	7.9e-05	0.000732	8.8e-05
Streptococcus ruminantium	Bacteria	24.7312	0.000191	0.000197	0.00012	6.8e-05	0.000183	0.000145	0.000329	8.7e-05	0.000375	0.000224	0.000157	0.000368	0.000287	0.000122	0.000252	4e-05	7.7e-05
Variovorax sp. PAMC 28711	Bacteria	23.6559	0.00019	1.9e-05	5.1e-05	0	0.000101	6e-06	0.001083	9.2e-05	0.000141	8.9e-05	0.000294	0.000243	0.000117	7.4e-05	0.00066	0	3.7e-05
Bordetella bronchialis	Bacteria	21.5054	0.00019	8e-06	6.1e-05	9.2e-05	1.5e-05	4.2e-05	0.000684	0.000261	0.000344	0.000152	0.00023	0.000551	0.000154	2.3e-05	0.000274	9.1e-05	5e-05
Dickeya zeae	Bacteria	30.1075	0.00019	5.9e-05	6.1e-05	1.7e-05	5.5e-05	4.8e-05	0.000238	0.000594	0.000462	0.000139	0.000243	0.000269	0.000127	0.000473	0.000125	4.5e-05	0.000143
Fusobacterium hwasookii	Bacteria	32.2581	0.00019	0.00018	9.3e-05	0.000412	3.5e-05	0.000237	0.000249	2.9e-05	0.000257	0.000215	0.000164	0.000134	0.000179	0.000159	0.000245	0.000283	0.000133
Sphingobium cloacae	Bacteria	11.828	0.00019	0	0.00011	0.000218	7.9e-05	3e-05	0.000238	0.000852	3.4e-05	0.000238	0.000141	0.000268	0.000106	0	9.4e-05	0.000542	0.000113
Bradyrhizobium icense	Bacteria	18.2796	0.00019	2.6e-05	0.000103	8e-06	4e-06	1.7e-05	3.9e-05	0.001306	9.1e-05	0.000328	4.8e-05	4.5e-05	5.1e-05	2.3e-05	0.000105	0.000883	1e-06
Streptomyces sp. 3025	Bacteria	20.4301	0.000189	5.8e-05	0.000119	6.5e-05	1.8e-05	6.6e-05	0	0.001236	2.9e-05	0.000317	5.9e-05	3.7e-05	0.000109	2e-05	9e-05	0.000838	1.1e-05
Corynebacterium amycolatum	Bacteria	12.9032	0.000189	0.000107	0.0001	0	0	0	3.5e-05	0.001194	0.000148	0.000328	4.8e-05	6.4e-05	0.000287	8e-06	0.000134	0.000606	8e-06
Pimelobacter simplex	Bacteria	17.2043	0.000189	4.9e-05	0	1.2e-05	3e-06	1.2e-05	1.1e-05	0.001423	7.5e-05	0.000348	2.7e-05	3.3e-05	6e-05	2.6e-05	3e-05	0.000943	1.4e-05
Alteromonas macleodii	Bacteria	31.1828	0.000189	3.3e-05	0.000125	0.000474	2.3e-05	0.000389	0.000246	6.6e-05	0.000136	9.1e-05	0.000289	0.000104	9.5e-05	0.000611	9.7e-05	0.000245	2.9e-05
Sutcliffiella horikoshii	Bacteria	32.2581	0.000189	0.000421	0.000149	0.000236	0.000106	2.6e-05	0.000123	4.9e-05	0.000382	0.000165	0.000213	0.000209	0.000231	0.000194	0.000349	9.4e-05	5.8e-05
Anaeromyxobacter sp. Red232	Bacteria	22.5806	0.000189	1.4e-05	9e-05	6e-06	3.7e-05	1.5e-05	7e-06	0.001353	6.9e-05	0.000344	3e-05	3.5e-05	5.4e-05	3.5e-05	6e-05	0.000909	1e-05
Arthrobacter sp. NtRootA1	Bacteria	27.957	0.000188	0.000467	0.000106	0.000263	0.000185	5.5e-05	7.5e-05	9e-05	0.000245	0.000153	0.000225	0.000179	4.8e-05	0.000302	0.000206	0.000402	6e-06
Gordonia hongkongensis	Bacteria	11.828	0.000188	3e-05	8e-05	0	8e-06	0	1e-05	0.001362	9.5e-05	0.000344	2.9e-05	1.8e-05	3.6e-05	7.2e-05	7.2e-05	0.000905	0
Vagococcus penaei	Bacteria	29.0323	0.000188	0.000178	4.5e-05	0	0.00019	5.9e-05	3.3e-05	0.001004	3.7e-05	0.0003	7.3e-05	0.000764	4e-05	0.000167	4.3e-05	7.6e-05	7.2e-05
Cronobacter condimenti	Bacteria	23.6559	0.000188	2.3e-05	0.000564	8.2e-05	0.000241	0.00011	0.000357	2.9e-05	0.000145	4.4e-05	0.000335	6.3e-05	7e-05	0.000537	2.3e-05	0.000399	6.9e-05
Paenibacillus sp. FSL P4-0081	Bacteria	25.8065	0.000188	0.000243	8e-05	5.9e-05	5.4e-05	8e-05	0.000291	0.000134	0.000539	0.000166	0.00021	0.000193	0.000191	0.000294	0.000195	0.000143	0.000124
Bifidobacterium subtile	Bacteria	30.1075	0.000187	0.000153	0.000147	7.3e-05	9.3e-05	0.00012	0.000136	0.000518	0.000281	0.000228	0.000146	0.000244	0.000404	0.000111	0.000226	7e-05	6.5e-05
Shewanella xiamenensis	Bacteria	15.0538	0.000187	2e-05	0.00012	0.000157	4e-05	1.1e-05	0.000615	0.000431	0.000115	0.000126	0.00025	0.000511	0.000156	0.000103	8.3e-05	0.00028	0
Herbaspirillum frisingense	Bacteria	33.3333	0.000187	1.7e-05	0.000324	0.000304	0.000557	4.1e-05	5e-05	8.2e-05	0.000136	6.4e-05	0.000313	8.5e-05	0.00062	4.7e-05	0.000141	0.0001	0.000106
Methylobacterium currus	Bacteria	19.3548	0.000187	2.9e-05	6.8e-05	7e-06	8e-06	7e-06	0	0.001359	9.8e-05	0.00034	3.1e-05	1.8e-05	9.6e-05	2.9e-05	5.8e-05	0.000879	1.5e-05
Methylobacterium oryzae	Bacteria	23.6559	0.000187	1.8e-05	0.000188	0.000111	7e-06	1.6e-05	0.000437	0.000117	0.000594	0.000218	0.000155	0.000372	0.000164	6.9e-05	0.000205	2.2e-05	0.000285
Ligilactobacillus acidipiscis	Bacteria	27.957	0.000187	0.000286	4e-05	6.1e-05	0.000194	5.4e-05	0.000673	2.8e-05	0.00012	0.000205	0.000168	0.00069	6.3e-05	7.5e-05	0.00024	0	7e-05
Chromobacterium sp. ATCC 53434	Bacteria	17.2043	0.000186	1.1e-05	1.1e-05	0.00015	0.000647	6.4e-05	8e-06	0.000542	5.9e-05	0.000137	0.000237	0.000537	2.6e-05	9e-06	5.1e-05	0.000369	0.000127
Labilithrix luteola	Bacteria	30.1075	0.000186	3.4e-05	5.2e-05	0.000343	7.4e-05	6.8e-05	8.4e-05	0.000719	0.000135	0.000214	0.000157	0.000116	0.000101	0.000334	6.3e-05	0.000438	7.7e-05
Streptomyces chartreusis	Bacteria	32.2581	0.000185	0.000144	0.000139	0.000121	5.8e-05	4.1e-05	1.6e-05	0.000856	0.000158	0.000283	8.6e-05	5.7e-05	0.000157	0.000113	0.000122	0.000581	6.5e-05
Fusobacterium gonidiaformans	Bacteria	29.0323	0.000185	0.000159	5.2e-05	0.000308	0.00017	6.5e-05	0.000399	9.3e-05	0.000207	0.000154	0.000218	0.000198	0.00019	7.6e-05	0.000197	0.000213	0.000225
Rubrobacter xylanophilus	Bacteria	27.957	0.000185	4.9e-05	4.7e-05	1.1e-05	6.3e-05	7.4e-05	7.5e-05	0.000877	0.00032	0.000193	0.000177	0.000117	0.000334	0.000115	7e-05	0.000411	5e-05
Virgibacillus sp. SK37	Bacteria	24.7312	0.000185	3.7e-05	1.4e-05	0.00072	0.000135	3.5e-05	0.000356	3.5e-05	0.000106	0.000117	0.000254	0.000165	0.000299	8.1e-05	0.000248	6.7e-05	0.000235
Saccharothrix syringae	Bacteria	30.1075	0.000184	0.000308	7.2e-05	6.8e-05	0.000132	4.6e-05	1.5e-05	0.000761	0.000103	0.000278	8.9e-05	5.4e-05	0.000135	0.000332	6.2e-05	0.000477	5.7e-05
Aquincola tertiaricarbonis	Bacteria	32.2581	0.000184	0.000517	0.000191	9.8e-05	1.1e-05	0.000101	0.000102	0.000348	0.000121	0.000126	0.000243	0.000122	0.000227	5.7e-05	0.000347	0.000284	4.9e-05
Sinomonas atrocyanea	Bacteria	18.2796	0.000184	5.8e-05	2.1e-05	0	7e-06	1e-05	2.2e-05	0.001368	5.7e-05	0.000335	2.9e-05	3.1e-05	0.0001	7e-06	4e-05	0.000871	2.2e-05
Sediminibacillus sp. DP4-553-S	Bacteria	30.1075	0.000184	0.000111	0.000219	0.000152	0.000241	4.5e-05	0.000114	3.7e-05	0.000544	0.000166	0.000202	0.000259	0.000234	0.000192	0.000336	5.9e-05	2.8e-05
Rhodoferax koreense	Bacteria	21.5054	0.000183	3.2e-05	3.8e-05	0.000466	8e-06	5.6e-05	0.000115	0.000436	0.000314	0.000277	8.8e-05	7e-05	0.000155	9.2e-05	6.5e-05	0.000328	0.000372
Nakamurella multipartita	Bacteria	25.8065	0.000183	3.3e-05	4.2e-05	0.000114	1.8e-05	8.3e-05	3.9e-05	0.001041	0.000145	0.00025	0.000115	6.7e-05	7.4e-05	9.9e-05	4.9e-05	0.000661	0.000132
Curtobacterium sp. BH-2-1-1	Bacteria	21.5054	0.000183	0.000279	3.9e-05	0.000284	0	1e-05	3.7e-05	0.0008	4.5e-05	0.000279	8.5e-05	5.2e-05	9.8e-05	0.000248	3.6e-05	0.000624	4.2e-05
Miltoncostaea oceani	Bacteria	13.9785	0.000183	1.7e-05	3.3e-05	0	7e-06	0.000104	8.1e-05	0.001251	3.3e-05	0.000299	6.4e-05	8.1e-05	3.5e-05	1.3e-05	3.2e-05	0.000909	0
Chryseobacterium sp. G0162	Bacteria	19.3548	0.000183	1.9e-05	6.1e-05	0.000265	7.7e-05	0.000895	0	4.7e-05	6.7e-05	0.000331	3.1e-05	7.6e-05	8.6e-05	2.8e-05	0.000837	0	4.4e-05
Halomonas sulfidivorans	Bacteria	17.2043	0.000183	1.5e-05	2.6e-05	4.3e-05	0	3e-06	0.000116	0.001228	9.3e-05	0.000315	4.8e-05	7e-05	5.3e-05	7.8e-05	6.2e-05	0.000814	0
Streptomyces sp. MA3_2.13	Bacteria	29.0323	0.000183	3.8e-05	8.6e-05	3.3e-05	2.6e-05	8e-06	6.7e-05	0.001109	0.000156	0.000291	7.2e-05	7.4e-05	8.8e-05	5.3e-05	8.9e-05	0.000731	3.7e-05
Erwinia gerundensis	Bacteria	25.8065	0.000182	0.00032	0.000127	9.6e-05	4.7e-05	6e-06	5.9e-05	8.7e-05	0.0007	0.000113	0.000254	0.000142	0.000296	0.000345	0.000238	2.8e-05	6.2e-05
Gryllotalpicola protaetiae	Bacteria	21.5054	0.000182	2.5e-05	4.3e-05	0.000325	4e-06	0.000115	1.2e-05	0.000938	3.6e-05	0.000254	0.000109	2.5e-05	8.1e-05	0.000247	4.5e-05	0.000587	0.000107
Weissella cibaria	Bacteria	27.957	0.000182	0.0001	0.000201	0.000599	6.7e-05	6.7e-05	0	0.000126	0.000296	0.00016	0.000205	0.000141	0.000185	9.8e-05	0.00053	6.4e-05	6.3e-05
Sphingomonas sp. AP4-R1	Bacteria	17.2043	0.000182	2e-06	0	9.7e-05	5e-06	1.2e-05	9e-05	0.001304	1.1e-05	0.000306	5.6e-05	7.2e-05	8.5e-05	3e-06	0	0.000799	0.000104
Pseudobacter ginsenosidimutans	Bacteria	25.8065	0.000182	5.3e-05	9e-06	1.3e-05	6.4e-05	0.0001	2.2e-05	0.000434	0.000753	0.000174	0.00019	5.9e-05	9.4e-05	8.2e-05	2.6e-05	0.000798	1.3e-05
Gemmata massiliana	Bacteria	23.6559	0.000181	8.6e-05	9.6e-05	0	3.9e-05	0.000296	4.9e-05	0.000873	5.6e-05	0.000301	6e-05	5.9e-05	2.9e-05	5.7e-05	0.000333	0.000583	4e-06
Thermus oshimai	Bacteria	23.6559	0.000181	0.000181	6e-06	4.2e-05	6.8e-05	8e-05	0.000687	0.0001	0.00025	0.000178	0.000184	0.000515	0.000126	0.000192	0.00013	0.000146	0
Cloacibacterium normanense	Bacteria	19.3548	0.000181	2e-06	0.000179	0.00034	2.3e-05	8e-06	0.000132	0.000597	0.000202	0.000204	0.000158	1.3e-05	0.000103	0.000128	0.000175	0.000419	0.000232
Actinomyces gaoshouyii	Bacteria	30.1075	0.000181	0.0002	0.000101	6.5e-05	0.000153	0.000274	0.000105	0.000181	0.000358	0.000243	0.000118	0.000137	0.000232	7e-05	0.000328	8e-05	0.000224
Desulfomicrobium orale	Bacteria	20.4301	0.000181	2.1e-05	0.000244	1.2e-05	7e-06	0.000121	7.3e-05	0.001014	3.6e-05	0.000207	0.000155	1.5e-05	6.7e-05	1.4e-05	0.000228	0.000474	0.000258
Bradyrhizobium sp. SK17	Bacteria	19.3548	0.000181	2.7e-05	0	1.2e-05	3.2e-05	1.6e-05	0.00017	0.001	0.000231	0.00028	8e-05	0.000192	7.3e-05	5.8e-05	5.1e-05	0.000699	0
Thauera sp. K11	Bacteria	24.7312	0.000181	2.7e-05	9.5e-05	9.7e-05	3e-06	0.000292	6.4e-05	0.000789	0.000117	0.000266	9.5e-05	7.3e-05	0.000144	3.8e-05	6.5e-05	0.000681	6.2e-05
Pantoea dispersa	Bacteria	31.1828	0.000181	0.000124	0.000328	0.000375	3.1e-05	6.3e-05	0.000194	6.2e-05	0.000285	0.000161	0.000202	0.000106	0.000145	0.000206	8.4e-05	0.000511	3.2e-05
Streptomyces luteoverticillatus	Bacteria	19.3548	0.000181	3.2e-05	3.2e-05	7e-06	2e-06	5e-06	3e-06	0.001412	3.3e-05	0.000294	6.5e-05	1.5e-05	0.000175	3e-06	4.2e-05	0.000814	4e-06
Pseudoxanthomonas suwonensis	Bacteria	30.1075	0.000181	7.8e-05	8.9e-05	0.000268	2e-05	0.000109	5.9e-05	0.00049	0.000346	0.000196	0.000166	0.000103	0.000167	0.000189	0.000123	0.000406	9.4e-05
Ligilactobacillus murinus	Bacteria	26.8817	0.000181	0.000257	9.7e-05	4.8e-05	0.000115	6.5e-05	0.000103	4.7e-05	0.000692	0.000169	0.000193	0.000267	0.000181	0.000153	0.000358	1.8e-05	0.00011
Marmoricola scoriae	Bacteria	25.8065	0.000181	2.8e-05	0.000304	9e-06	2.3e-05	0.000111	5.2e-05	0.000954	4.8e-05	0.000234	0.000127	6.2e-05	0.000201	3.1e-05	8.7e-05	0.00056	0.000117
Megalodesulfovibrio gigas	Bacteria	26.8817	0.000181	1.3e-05	0.000354	1.4e-05	3.7e-05	1.2e-05	0.000329	0.000611	0.00014	0.000135	0.000227	7.5e-05	7.3e-05	4.7e-05	0.000462	1.6e-05	0.000387
Pseudomonas sp. phDV1	Bacteria	11.828	0.000179	1.8e-05	0.000102	6e-05	9e-06	0.00024	0.000268	8e-05	0.000636	4e-05	0.000321	0.00023	0.000119	0.00055	6.3e-05	0.000162	0
Pantoea deleyi	Bacteria	27.957	0.000179	0.000409	7.4e-05	7e-05	0.000207	9.4e-05	9.1e-05	0.000115	0.000348	4.3e-05	0.000318	6.2e-05	0.000184	1.3e-05	0.000344	0.000287	0.000156
Dactylosporangium vinaceum	Bacteria	26.8817	0.000179	4.2e-05	0.000111	2.8e-05	0.000144	0.00012	7e-06	0.0009	0.000126	0.000277	7.9e-05	0.000171	0.000128	2.4e-05	6.9e-05	0.000641	2.1e-05
Enterobacter oligotrophicus	Bacteria	15.0538	0.000179	4e-06	0.000569	4.3e-05	0.000229	2.6e-05	0.00033	0.000196	9.8e-05	6e-05	0.000299	4e-05	5.9e-05	0.000494	9e-06	0.000471	3e-05
Sphingomonas radiodurans	Bacteria	21.5054	0.000179	0.000329	4.5e-05	3.6e-05	4e-06	1.1e-05	0.000255	0.000536	0.00022	0.000252	0.000103	0.000209	0.000137	0.000251	0.000205	0.00028	0
Oceanidesulfovibrio marinus	Bacteria	23.6559	0.000178	2.3e-05	0.000387	0.000241	3.4e-05	8e-06	0.000143	0.000507	0.000146	7.5e-05	0.000284	7.2e-05	0.000236	4.5e-05	0.000498	0	0.000196
Porphyromonas asaccharolytica	Bacteria	17.2043	0.000178	0.000188	2e-06	0.00046	1.4e-05	0.00024	0	0.000137	0.000352	0.000161	0.000196	9.7e-05	0.000233	1e-05	0.000143	0.000156	0.000404
Sphingomonas sanxanigenens	Bacteria	22.5806	0.000178	1.3e-05	9.7e-05	8.5e-05	1.1e-05	7.8e-05	0.000169	0.000968	5.7e-05	0.000251	0.000103	0.000141	0.000106	9e-06	8.9e-05	0.000637	6.4e-05
Hymenobacter sp. BRD128	Bacteria	22.5806	0.000178	0.000269	1.4e-05	0.00034	0.000238	7e-06	0.00039	5.4e-05	7.6e-05	0.000251	0.000104	0.000263	0.000246	0.000295	3.2e-05	0	0.000253
Paenibacillus donghaensis	Bacteria	35.4839	0.000178	7.6e-05	0.000149	0.000112	8.5e-05	9.4e-05	0.000205	0.000251	0.000454	0.000204	0.000151	0.000255	0.000176	0.000174	0.000169	0.000121	0.000178
Neorhizobium galegae	Bacteria	31.1828	0.000178	0.000139	5e-05	0.000128	6.9e-05	0.000199	0.000101	0.000591	0.00016	0.000214	0.000142	0.000158	0.000176	0.000114	5.2e-05	0.000403	0.000156
Dehalobacter restrictus	Bacteria	23.6559	0.000178	0.000138	0.00024	8.3e-05	0.000403	4e-06	7.5e-05	3.4e-05	0.000444	0.000163	0.000193	0.000411	0.000199	0.000145	0.000278	0	4.4e-05
Streptomyces hygroscopicus	Bacteria	21.5054	0.000178	5.5e-05	1.3e-05	0.000153	0.00021	0.000161	2.8e-05	0.00063	0.000182	0.000248	0.000106	0.000233	0.000174	4.8e-05	4e-05	0.000352	0.000206
Planococcus antarcticus	Bacteria	27.957	0.000178	0.000682	5.6e-05	4.9e-05	0.000226	7.4e-05	0.000103	2.7e-05	0.000173	5.9e-05	0.000299	0.000233	7.9e-05	8.3e-05	0.000131	0	0.000533
Acetivibrio thermocellus	Bacteria	30.1075	0.000178	0.000188	0.000173	4.9e-05	7.6e-05	0.000162	0.000189	7.7e-05	0.000497	0.000206	0.000149	0.000266	0.000179	0.000206	0.000208	5.5e-05	0.000162
Leptotrichia trevisanii	Bacteria	27.957	0.000178	0.000297	7.7e-05	0.000154	9.3e-05	0.000148	1.9e-05	0.000321	0.000307	0.000211	0.000144	0.000123	0.00022	0.000328	0.00016	0.000226	2.5e-05
Loigolactobacillus coryniformis	Bacteria	23.6559	0.000178	0.000275	5.5e-05	7.9e-05	0.000212	0.000162	0.000115	2.8e-05	0.000461	0.000165	0.000191	0.000315	0.000222	0.000104	0.000216	0	0.000209
Nocardioides sp. MC1495	Bacteria	25.8065	0.000177	3.4e-05	6.7e-05	0.000288	3e-06	3e-05	0.000112	0.00087	5.3e-05	0.000232	0.000121	3.9e-05	5.9e-05	0.000259	8.8e-05	0.0005	0.00012
Methylobacterium terrae	Bacteria	21.5054	0.000177	7e-06	5.4e-05	1.8e-05	1.2e-05	3e-06	3.4e-05	0.001309	5.4e-05	0.000337	1.4e-05	2.9e-05	4.1e-05	2.7e-05	5.3e-05	0.000822	6.3e-05
Amycolatopsis keratiniphila	Bacteria	24.7312	0.000177	0.000203	2.9e-05	4e-05	1e-05	1.8e-05	0.000152	0.000932	6.8e-05	0.000267	8.5e-05	0.000148	8.5e-05	0.000189	2.3e-05	0.00058	3.6e-05
Staphylococcus saccharolyticus	Bacteria	18.2796	0.000177	2.6e-05	0.000566	5.5e-05	6e-06	5e-06	0.00035	1.7e-05	0.00044	0.000177	0.000176	1e-05	7.7e-05	0.000108	0.00029	0	0.000556
Clostridium sp. JN-9	Bacteria	32.2581	0.000177	0.000237	0.000155	1.8e-05	7.6e-05	0.000112	0.000233	0.000162	0.000416	0.000212	0.00014	0.000169	0.000253	0.000306	0.000195	2e-05	0.000133
Gordonia bronchialis	Bacteria	21.5054	0.000176	3e-05	3.3e-05	0.000189	1.1e-05	3e-06	0.000399	0.000689	7.6e-05	0.000197	0.000155	3.8e-05	0.000346	5e-05	2.8e-05	0.000493	7.8e-05
Solidesulfovibrio magneticus	Bacteria	21.5054	0.000176	0.000308	0.00028	0.000135	7e-06	2.2e-05	7.7e-05	0.00058	5.1e-05	0.000182	0.000171	4.5e-05	5.5e-05	0.000294	0.000233	0.000244	0.000193
Sodalis sp. dw_23	Bacteria	22.5806	0.000176	1.1e-05	2.1e-05	5.6e-05	0.000623	7e-06	0.000408	0.000137	0.000118	8.2e-05	0.000273	0.000125	0.000161	5.7e-05	3e-06	0.000561	0.000133
Iocasia fonsfrigidae	Bacteria	30.1075	0.000176	0.000122	0.000102	0.000198	2.5e-05	7.5e-05	4.8e-05	0.000684	0.000186	0.000275	7.5e-05	9.1e-05	8.7e-05	0.00013	0.000235	0.000431	7.1e-05
Streptomyces spectabilis	Bacteria	27.957	0.000176	3.5e-05	2.6e-05	0.000128	2e-05	8.8e-05	0.000198	0.000868	7.7e-05	0.000304	4.5e-05	0.000182	0.000166	2.4e-05	3.6e-05	0.000534	9.5e-05
Levilactobacillus zymae	Bacteria	22.5806	0.000176	0.000285	5.1e-05	1.8e-05	1.2e-05	0.000234	0.000628	0.000136	1.9e-05	0.000122	0.00023	3.3e-05	0.000255	0.000236	0.000492	0	3.8e-05
Bifidobacterium choerinum	Bacteria	29.0323	0.000176	0.000102	8.3e-05	5.7e-05	0.000141	0.000115	4.8e-05	0.000646	0.000237	0.000213	0.000138	0.000184	0.000235	0.000145	0.000109	0.000294	8.4e-05
Polynucleobacter sp. LimPoW16	Bacteria	21.5054	0.000175	0.000408	0.000154	0.000385	5e-06	8e-06	0.000209	0.000161	6.9e-05	0.000154	0.000197	2.5e-05	0.000367	0.000303	2e-05	9.4e-05	0.000249
Microbacterium sp. TPU 3598	Bacteria	24.7312	0.000175	6.2e-05	0.000233	8.6e-05	6e-06	4.4e-05	0.000139	0.000757	0.000134	0.000278	7e-05	9.3e-05	0.000129	3.8e-05	0.000222	0.000522	2.6e-05
Paenibacillus sp. Cedars	Bacteria	15.0538	0.000175	6e-05	0.000172	5.4e-05	0	5.2e-05	1.6e-05	7.1e-05	0.000967	0.000289	5.9e-05	4.6e-05	8.5e-05	6.1e-05	0.000357	0	0.00048
Rhodococcus koreensis	Bacteria	16.129	0.000175	2e-05	3e-06	0.000101	4e-06	4e-06	3e-05	0.001269	3e-05	0.000311	3.5e-05	2.9e-05	5.8e-05	1.8e-05	9e-06	0.000841	6.5e-05
Streptococcus sp. DAT741	Bacteria	22.5806	0.000175	9.1e-05	1.6e-05	0.000101	0.000328	3.7e-05	0	0.000504	0.000321	7.8e-05	0.000274	0.00026	0.000437	0.000143	0.000119	0	9e-05
Streptomyces paludis	Bacteria	23.6559	0.000174	0.000142	0.000113	0.0003	4.9e-05	0.000129	0.000141	0.000516	2.3e-05	0.000237	0.00011	2.8e-05	0.000285	0.000132	0.000174	0.000168	0.000244
Bacillus sp. FJAT-22090	Bacteria	37.6344	0.000174	0.000226	0.00014	8.6e-05	0.000159	0.000122	0.000297	0.000178	0.000178	0.000167	0.000181	0.000212	0.000178	0.000164	7.2e-05	0.000258	0.000161
Clostridium drakei	Bacteria	29.0323	0.000174	0.000169	0.000297	0.000504	1.4e-05	7e-05	0.000121	7.2e-05	0.000157	0.000225	0.000122	0.000127	0.00016	5.7e-05	0.00035	0.00016	0.000173
Serratia plymuthica	Bacteria	32.2581	0.000174	4.2e-05	0.000111	0.000206	5.2e-05	7e-06	0.000202	0.000434	0.00035	0.000196	0.000152	0.000264	5e-05	7.9e-05	0.000103	0.000518	2.4e-05
Limosilactobacillus frumenti	Bacteria	24.7312	0.000174	6e-06	0.000172	0.000541	0.000182	0.000194	5.9e-05	0.00011	0.000123	6.8e-05	0.000282	0.000201	0.000218	0.000293	5e-05	0.000173	0.000124
Agrococcus sp. SCSIO52902	Bacteria	19.3548	0.000173	0.00061	0	7.2e-05	3.2e-05	4e-06	5.2e-05	0.000566	5.5e-05	0.000161	0.000186	7.9e-05	3e-05	2.2e-05	7.8e-05	0.000356	0.00045
Amycolatopsis sp. WQ 127309	Bacteria	22.5806	0.000173	3e-05	2.6e-05	1.9e-05	1.9e-05	2.4e-05	7.1e-05	0.001144	0.000109	0.000297	4.6e-05	9.7e-05	0.000129	2.5e-05	2.8e-05	0.000708	2.8e-05
Brevibacterium aurantiacum	Bacteria	29.0323	0.000173	0.000652	6.4e-05	0.000154	1.6e-05	0.000131	0.000143	0.000137	6.7e-05	0.0001	0.000248	0.000205	0.000116	2.8e-05	0.000599	1.9e-05	5.6e-05
Raoultella planticola	Bacteria	19.3548	0.000173	1.1e-05	0.00049	6.3e-05	0.0002	1.4e-05	0.000479	8.4e-05	8.8e-05	2.6e-05	0.000323	0.000217	6.5e-05	0.000435	1.8e-05	0.000289	4.9e-05
Riemerella anatipestifer	Bacteria	30.1075	0.000173	1.2e-05	6.5e-05	0.00062	3.4e-05	6.4e-05	0.000318	0.000163	8.6e-05	0.00014	0.000206	0.000558	8.3e-05	3.7e-05	0.000219	4.3e-05	0.000104
Amycolatopsis sp. DSM 110486	Bacteria	27.957	0.000173	2.8e-05	3e-05	4.5e-05	5.1e-05	6e-06	8.8e-05	0.000968	0.000207	0.000263	8e-05	0.000126	7e-05	8.5e-05	5.3e-05	0.000665	2.2e-05
Thermomonospora amylolytica	Bacteria	19.3548	0.000172	2.6e-05	6.5e-05	0	8e-06	9e-06	3.2e-05	0.001215	9.3e-05	0.000306	3.6e-05	2.1e-05	7.4e-05	4.9e-05	4.8e-05	0.000795	2.2e-05
Streptomyces dengpaensis	Bacteria	18.2796	0.000171	1.2e-05	8.7e-05	0.001089	1.2e-05	5.6e-05	3e-06	5.2e-05	3.6e-05	2.7e-05	0.000319	0.000889	2.9e-05	2e-05	5.6e-05	0	6.2e-05
Cronobacter dublinensis	Bacteria	22.5806	0.000171	1.5e-05	0.00042	8.8e-05	0.000208	0.000222	0.000323	3.9e-05	8.1e-05	7.8e-05	0.000265	8.9e-05	6e-05	0.000418	2.2e-05	0.000405	5.6e-05
Nocardioides marinisabuli	Bacteria	16.129	0.000171	0.000244	0	0	9e-06	2.5e-05	0	0.001107	2.9e-05	0.000328	9e-06	1.1e-05	5e-05	0.000198	1.7e-05	0.000727	1.4e-05
Vagococcus xieshaowenii	Bacteria	31.1828	0.00017	8.2e-05	0.000251	0.000452	0.000264	1.2e-05	6.7e-05	9.3e-05	0.000148	0.000145	0.000197	0.0002	0.000239	0.000119	7.2e-05	0.000131	0.000256
Paenibacillus sp. R14(2021)	Bacteria	32.2581	0.00017	0.000284	0.000256	0.0001	3.2e-05	2.7e-05	9.6e-05	0.00041	0.000191	0.000246	9.3e-05	0.000172	0.00012	0.000146	0.000212	0.000345	2.2e-05
Phytohabitans suffuscus	Bacteria	26.8817	0.00017	4.9e-05	4.8e-05	7.6e-05	2.1e-05	8.7e-05	1.1e-05	0.000944	0.000168	0.000284	5.3e-05	6.7e-05	8.6e-05	4.3e-05	7.8e-05	0.00062	0.000104
Cupriavidus campinensis	Bacteria	27.957	0.00017	1.1e-05	0.000158	0.000319	2.5e-05	7.3e-05	0.000417	0.000206	0.000152	0.000147	0.000193	0.000218	6.9e-05	3.3e-05	0.000189	0.000243	0.000254
Gracilibacillus sp. SSWR10-1	Bacteria	29.0323	0.00017	0.00019	1.8e-05	0.000375	3e-05	9.2e-05	0.000248	2.3e-05	0.000345	0.00013	0.00021	6.1e-05	0.00014	0.000226	0.000345	9.2e-05	0.000155
Nocardioides rotundus	Bacteria	21.5054	0.00017	2.7e-05	3e-06	0.000595	1e-05	0.000105	3.1e-05	0.000489	9.8e-05	0.000254	8.4e-05	3.7e-05	0.000121	3.2e-05	0.000227	0.000117	0.000459
Kutzneria albida	Bacteria	31.1828	0.00017	0.000437	6.4e-05	6.8e-05	2.7e-05	0.000276	7.7e-05	0.000302	0.0001	0.000236	0.000102	7.2e-05	9.5e-05	0.000279	0.000391	0.000144	4.4e-05
Ornithinimicrobium avium	Bacteria	19.3548	0.00017	1.4e-05	2.2e-05	8e-06	4e-06	3.9e-05	3.3e-05	0.001266	3.8e-05	0.000314	2.2e-05	4.4e-05	5.6e-05	8e-06	1.5e-05	0.000859	8e-06
Lelliottia sp. WB101	Bacteria	17.2043	0.000169	0	0.000517	6.3e-05	0.00029	2.7e-05	0.000289	5.6e-05	0.000163	4.1e-05	0.0003	9.4e-05	7.2e-05	0.000491	5e-06	0.000344	4.6e-05
Skermanella mucosa	Bacteria	15.0538	0.000169	8.7e-05	0	7.9e-05	1e-05	4e-06	0	0.001005	0.000212	0.000266	7.1e-05	3.2e-05	0.000133	0.000106	5.2e-05	0.000678	0
Agrobacterium vitis	Bacteria	31.1828	0.000169	9.1e-05	0.000132	3.1e-05	6.8e-05	1.5e-05	0.000617	0.000139	0.00025	9e-05	0.000249	0.000159	0.000522	0.000116	0.00011	3.9e-05	6.1e-05
Selenomonas sp. oral taxon 920	Bacteria	31.1828	0.000168	0.000137	0.00025	4.1e-05	4.1e-05	3e-06	0.000241	0.000305	0.000351	0.000203	0.000132	0.000121	5.7e-05	6.8e-05	0.000309	0.000272	0.000166
Stieleria neptunia	Bacteria	18.2796	0.000168	1.7e-05	5.5e-05	6.3e-05	1.9e-05	1e-05	6.8e-05	0.001162	1.4e-05	0.000281	5.2e-05	0.000102	2.3e-05	1.9e-05	3.6e-05	0.000769	3.6e-05
Enterobacter bugandensis	Bacteria	23.6559	0.000168	1.1e-05	0.000466	3.1e-05	0.000224	1.3e-05	0.000379	0.000149	0.000116	6.9e-05	0.000269	5.8e-05	6.1e-05	0.000463	7.6e-05	0.000341	3.5e-05
Pseudodesulfovibrio aespoeensis	Bacteria	20.4301	0.000167	2.3e-05	0.000335	2.7e-05	3.1e-05	8e-06	0.000446	0.000429	9.2e-05	6e-05	0.000278	0.000133	4.7e-05	2.6e-05	0.000482	2.5e-05	0.000272
Rhodobacter capsulatus	Bacteria	30.1075	0.000167	0.00015	0.000136	8.3e-05	4.2e-05	1.2e-05	8.1e-05	0.000572	0.000291	0.00022	0.000114	8e-05	0.000152	0.000136	0.000164	0.000369	9.4e-05
Citrobacter sedlakii	Bacteria	10.7527	0.000167	0	0.000627	0.00017	0.000197	1.2e-05	0.000267	0	0.000128	2.8e-05	0.000309	3.3e-05	0.000187	0.00042	0	0.00037	1.6e-05
Jonesia denitrificans	Bacteria	26.8817	0.000167	0.000257	2.6e-05	0.000672	5e-06	6.3e-05	0.000186	2.5e-05	6.8e-05	0.000116	0.000219	3e-05	8.8e-05	0.000124	0.000396	0.000347	3e-06
Parageobacillus genomosp. 1	Bacteria	26.8817	0.000167	1.2e-05	0.000246	0.000248	9.6e-05	2.1e-05	0.000163	0.000361	0.000217	0.000139	0.000196	0.000204	0.000274	4.9e-05	6.1e-05	0.000299	0.000101
Streptomyces sp. SN-593	Bacteria	22.5806	0.000167	9.3e-05	2e-05	1.6e-05	1.4e-05	9e-06	4e-06	0.001168	7e-05	0.000287	4.4e-05	3.6e-05	6.5e-05	2.3e-05	7.7e-05	0.00075	2.3e-05
Corallococcus coralloides	Bacteria	26.8817	0.000167	0.000182	0.000132	6e-06	2.2e-05	3.6e-05	7.4e-05	0.000825	0.000106	0.000273	5.9e-05	9.4e-05	0.000136	0.000169	8.4e-05	0.000492	2e-05
Microbacterium sp. JZ31	Bacteria	21.5054	0.000167	2.8e-05	0.0001	0	8e-06	1.8e-05	4e-06	0.001114	0.000129	0.000291	4e-05	2.5e-05	0.000101	4.5e-05	7.6e-05	0.000701	2.9e-05
Frankia alni	Bacteria	20.4301	0.000167	0.000149	2.6e-05	1e-05	8e-06	8e-06	3.7e-05	0.001072	7.3e-05	0.000282	4.8e-05	5.5e-05	6.3e-05	0.000109	5.2e-05	0.000686	2.1e-05
Acidaminococcus fermentans	Bacteria	27.957	0.000166	0.000141	0.000209	0.000105	0.000106	7.9e-05	0.000168	0.000114	0.000414	0.000181	0.000152	0.000242	0.000182	0.000142	0.000292	2.5e-05	0.000117
Fictibacillus phosphorivorans	Bacteria	33.3333	0.000166	0.000159	0.000203	0.000121	0.000458	1.7e-05	9.8e-05	6e-05	0.000211	0.000166	0.000166	0.000115	0.000185	0.00019	0.000196	0.00021	0.000102
Micromonospora terminaliae	Bacteria	19.3548	0.000166	9.8e-05	2.4e-05	6.4e-05	1.2e-05	3e-05	8.6e-05	0.001028	3.6e-05	0.000277	5.3e-05	0.000104	8.9e-05	6.9e-05	2.3e-05	0.000682	1.5e-05
Nostoc sp. C052	Bacteria	18.2796	0.000166	2e-05	5.7e-05	0.000384	2e-06	0.000477	0.000225	7.2e-05	6.6e-05	0.000101	0.000233	2.5e-05	2.1e-05	0.000365	0.000214	0.000271	0.000117
Mesorhizobium loti	Bacteria	11.828	0.000166	1e-05	8e-05	0	9e-06	2.7e-05	0	0.001247	3.1e-05	0.00029	4e-05	1.9e-05	0.000134	9e-06	6.1e-05	0.000712	3.3e-05
Prevotella herbatica	Bacteria	24.7312	0.000166	1.4e-05	2.9e-05	0.000481	0.000245	0.000358	4.6e-05	2.8e-05	9.1e-05	0.000145	0.000187	0.000151	0.000143	1.4e-05	7.5e-05	0.000267	0.000325
Streptomyces katrae	Bacteria	20.4301	0.000166	1.8e-05	2.8e-05	9.9e-05	9e-06	3.4e-05	5.2e-05	0.001095	4.6e-05	0.000305	2.3e-05	0.000603	4e-05	4e-06	0.0001	0.000231	2.4e-05
Mycolicibacterium aurum	Bacteria	26.8817	0.000166	0.000505	6e-05	9.2e-05	3.2e-05	5.4e-05	0.000367	0.000141	5.4e-05	0.000151	0.000181	0.000166	6.6e-05	9.2e-05	9.3e-05	0.000203	0.000366
Staphylococcus lugdunensis	Bacteria	22.5806	0.000166	1.3e-05	0.000478	6e-06	5.5e-05	6.9e-05	0.000138	3e-05	0.000577	0.000171	0.00016	5.6e-05	0.000103	0.000237	8.5e-05	4.5e-05	0.000471
Pirellulimonas nuda	Bacteria	17.2043	0.000165	7.9e-05	1.2e-05	0	3e-06	1.4e-05	0	0.0012	7.6e-05	0.000295	3.3e-05	4e-06	3.7e-05	6.8e-05	3.4e-05	0.000818	9e-06
Streptomyces sp. BJ20	Bacteria	17.2043	0.000165	5.8e-05	0	0	8.4e-05	7e-06	9e-06	0.000825	0.000367	0.000286	4.2e-05	9e-05	3.7e-05	8.9e-05	2.8e-05	0.000619	0.000115
Ensifer adhaerens	Bacteria	26.8817	0.000165	6.9e-05	0.000127	2.2e-05	1.6e-05	2.7e-05	0.00015	0.000833	0.000128	0.000224	0.000105	8.8e-05	9.9e-05	8.4e-05	0.000116	0.000545	4.4e-05
Actinoplanes sp. L3-i22	Bacteria	26.8817	0.000165	8.8e-05	8e-05	3e-05	3.7e-05	7.4e-05	0.000337	0.000475	0.00021	0.000251	7.7e-05	0.000338	0.000186	5.9e-05	9.8e-05	0.000239	6.7e-05
Saccharopolyspora spinosa	Bacteria	18.2796	0.000165	1.3e-05	7e-06	1.9e-05	1.7e-05	0.00011	0	0.001136	7.2e-05	0.000283	4.5e-05	3.4e-05	6.9e-05	1.7e-05	9e-06	0.000811	2.3e-05
Alkalihalobacillus sp. LMS39	Bacteria	27.957	0.000165	5.9e-05	5.9e-05	0.000121	2.3e-05	0.000168	4.3e-05	0.000475	0.000381	0.000169	0.000161	0.000127	0.000114	3.7e-05	0.000137	0.000554	4e-06
Leuconostoc garlicum	Bacteria	11.828	0.000165	3e-06	7.5e-05	7e-06	0	0	0	0.001118	0.00018	0.000307	1.9e-05	7e-06	6.1e-05	7.1e-05	5e-05	0.000761	1.7e-05
Anaerococcus mediterraneensis	Bacteria	21.5054	0.000165	0.000332	2.7e-05	0.0002	2e-06	0.000106	0.000139	0.000136	0.000349	0.000258	7e-05	0.000186	0.000235	4e-05	0.000445	0	6.9e-05
Microbacterium sp. 10M-3C3	Bacteria	18.2796	0.000164	1.7e-05	9e-06	0	6.8e-05	9e-06	5e-06	0.001007	0.000244	0.000303	2.3e-05	3.5e-05	8.5e-05	5.6e-05	1.5e-05	0.000633	0.00014
Kitasatospora albolonga	Bacteria	13.9785	0.000164	1.7e-05	0	9e-06	1.7e-05	2e-06	9e-06	0.00129	3.6e-05	0.000311	1.4e-05	3.3e-05	2.6e-05	1.8e-05	1.1e-05	0.000871	0
Metabacillus dongyingensis	Bacteria	34.4086	0.000164	0.00024	0.000278	0.000166	0.000139	0.000145	8.5e-05	3.5e-05	0.000234	0.000114	0.000216	0.000198	0.000315	0.000158	0.000169	6.8e-05	7.8e-05
Microbacterium oxydans	Bacteria	29.0323	0.000164	4.2e-05	0.000153	0.000152	5.1e-05	5.5e-05	0.000283	0.000372	0.000218	0.000193	0.000134	0.000217	0.000125	7.7e-05	0.00017	0.000218	0.000169
Aquabacter sp. L1I39	Bacteria	22.5806	0.000164	7e-06	3.9e-05	3.8e-05	3.5e-05	2.4e-05	0.000134	0.001058	3.1e-05	0.0003	2.5e-05	2.9e-05	0.0001	1.3e-05	2e-05	0.000768	2.5e-05
Micromonospora tulbaghiae	Bacteria	20.4301	0.000164	3.6e-05	6e-06	9.5e-05	0.000333	9e-06	2.5e-05	0.000694	0.000131	0.000206	0.000121	6.6e-05	0.00027	6.5e-05	7e-06	0.000506	5.1e-05
Amycolatopsis sp. YIM 10	Bacteria	23.6559	0.000164	3.2e-05	6.3e-05	2.5e-05	2.1e-05	7.4e-05	2.3e-05	0.000994	0.000131	0.000262	6.3e-05	4.4e-05	6.2e-05	3.2e-05	9.5e-05	0.00072	5e-06
Ilumatobacter coccineus	Bacteria	19.3548	0.000164	6.1e-05	0	0	1.5e-05	4.7e-05	5.3e-05	0.001113	7.2e-05	0.000276	4.9e-05	8.5e-05	5.3e-05	5.1e-05	4.5e-05	0.000712	1.7e-05
Listeria ivanovii	Bacteria	25.8065	0.000164	3.3e-05	0.000962	7.2e-05	9.2e-05	5.5e-05	4.2e-05	1.8e-05	0.000157	0.000248	7.7e-05	9.5e-05	4e-05	7.7e-05	5.7e-05	0.0001	0.000599
Sphingobium fuliginis	Bacteria	12.9032	0.000164	0.000614	0.000171	8.4e-05	0.000101	0	0.000281	2e-05	2.7e-05	0.000178	0.000149	9.4e-05	5.5e-05	0.000801	0	0.000107	0
Staphylococcus delphini	Bacteria	23.6559	0.000164	2.8e-05	0.000128	0.000574	0.0001	2e-06	1.8e-05	0.000221	0.000236	0.00012	0.000208	0.000101	6.6e-05	0.00011	2.2e-05	0.000142	0.00053
Actinomyces wuliandei	Bacteria	26.8817	0.000163	0.000217	0.00013	7.9e-05	3e-06	0.000132	9.3e-05	0.000118	0.000527	0.0002	0.000126	0.000261	0.0003	6.3e-05	0.000211	5.4e-05	8.5e-05
Amycolatopsis aidingensis	Bacteria	18.2796	0.000163	5.4e-05	3.4e-05	0	4e-06	4e-06	2e-05	0.001189	6.5e-05	0.000306	1.7e-05	3.1e-05	5.2e-05	1.3e-05	5e-05	0.000803	3e-06
Janthinobacterium agaricidamnosum	Bacteria	27.957	0.000163	0.000145	5.6e-05	3.5e-05	6.5e-05	2.5e-05	0.000131	0.000638	0.000231	0.00021	0.000115	0.000151	0.000497	0.000162	7.9e-05	2.6e-05	6.3e-05
Bradyrhizobium genosp. B	Bacteria	23.6559	0.000163	1.2e-05	4.2e-05	5.1e-05	2e-05	6e-06	0	0.001072	0.000157	0.000282	4.2e-05	3.4e-05	4.9e-05	6.1e-05	2.9e-05	0.000741	4.4e-05
Allokutzneria albata	Bacteria	22.5806	0.000163	1.4e-05	0.00014	4.4e-05	2e-06	1e-05	5.2e-05	0.001041	6.9e-05	0.000296	2.7e-05	1.3e-05	7.9e-05	1.6e-05	0.000127	0.000692	2.3e-05
Microbacterium sediminis	Bacteria	19.3548	0.000163	0.000213	2.7e-05	5.3e-05	4e-06	1e-05	2.9e-05	0.000658	0.000325	0.000201	0.000123	2.1e-05	0.000196	0.000204	9.9e-05	0.000424	2.8e-05
Clostridium chauvoei	Bacteria	27.957	0.000162	0.000353	0.000141	0.000104	3.7e-05	5.3e-05	0.000173	0.000176	0.00026	0.00017	0.000155	0.000312	0.000209	0.000207	0.000217	4e-06	3.9e-05
Kocuria flava	Bacteria	18.2796	0.000162	7e-05	8.7e-05	4e-06	6e-06	1.3e-05	4.7e-05	0.001079	5.7e-05	0.0003	2.2e-05	4.3e-05	7e-05	1e-05	9.9e-05	0.000701	2.4e-05
Endozoicomonas montiporae	Bacteria	29.0323	0.000162	0.000199	6.3e-05	0.000342	6.2e-05	0.000115	4.5e-05	6.3e-05	0.000384	0.000106	0.000219	9.2e-05	8.7e-05	0.000103	0.000353	0.00029	3.7e-05
Paraburkholderia fungorum	Bacteria	27.957	0.000162	1.4e-05	0.000981	8e-05	3.5e-05	8e-06	4.9e-05	0.000105	0.000154	0.000242	8e-05	7.1e-05	4.1e-05	6.6e-05	6.7e-05	0.00066	4.9e-05
Paenibacillus sp. FSL R7-0273	Bacteria	30.1075	0.000162	0.00016	0.000126	5.3e-05	8e-05	4.9e-05	0.000223	0.000327	0.000286	0.000207	0.000116	0.000138	0.000188	0.000165	0.000237	0.000184	5.9e-05
Citrobacter arsenatis	Bacteria	23.6559	0.000162	1.6e-05	0.000528	5.8e-05	0.000281	1.5e-05	0.000289	2.3e-05	0.000136	3.7e-05	0.00029	3.6e-05	0.000108	0.00048	1.8e-05	0.000319	4.4e-05
Clostridium sp. MF28	Bacteria	18.2796	0.000162	0.000235	0.000126	0	2.9e-05	0.000112	0.000326	2.7e-05	0.000423	0.000174	0.000149	6.6e-05	0.000112	0.000357	0.000298	0	0.000157
Methylomicrobium album	Bacteria	32.2581	0.000161	6.2e-05	8e-05	0.000402	3e-06	8.3e-05	0.000245	5.7e-05	0.000338	0.000147	0.000176	3.9e-05	0.000247	6.7e-05	0.000153	0.000283	0.00016
Marinobacter salarius	Bacteria	17.2043	0.000161	1.7e-05	1.3e-05	0	0.000479	1.1e-05	0.000102	0.000543	0.000134	0.000136	0.000188	8.9e-05	0.000396	0.0001	1.2e-05	0.000348	1.2e-05
Desulfosporosinus youngiae	Bacteria	29.0323	0.000161	0.000114	9.9e-05	7.6e-05	0.000191	0.000329	4.5e-05	9.8e-05	0.000324	0.000145	0.000178	0.000235	0.000104	0.000399	0.00016	3.4e-05	7.2e-05
Cellulomonas shaoxiangyii	Bacteria	21.5054	0.000161	8.6e-05	3.7e-05	4e-06	3e-06	0.000106	3e-05	0.00095	0.00012	0.000268	5.2e-05	3.8e-05	0.000104	5.9e-05	9.1e-05	0.000602	5.3e-05
Bacillus methanolicus	Bacteria	26.8817	0.000161	2.5e-05	6e-05	6.2e-05	6.5e-05	0.000179	0.000694	5.4e-05	0.000123	0.000238	8.2e-05	0.000597	0.000124	3e-05	9e-05	0.000123	1.3e-05
Kroppenstedtia eburnea	Bacteria	24.7312	0.000161	3.9e-05	4.1e-05	5.3e-05	4e-05	5e-06	7e-06	0.00037	0.000729	4.4e-05	0.00028	6.4e-05	9.3e-05	0.000306	5.3e-05	0.000448	1.2e-05
Olivibacter sp. LS-1	Bacteria	29.0323	0.00016	0.000324	1.1e-05	0.000389	1.9e-05	5.2e-05	0.000236	2.5e-05	0.00019	0.000191	0.000129	0.000166	0.000283	7.5e-05	3.7e-05	0.000265	0.000125
Shinella sp. XGS7	Bacteria	21.5054	0.00016	3.1e-05	3e-06	9e-06	4.8e-05	0.000273	4.6e-05	0.000544	0.000333	0.000147	0.000174	6.8e-05	1.1e-05	0.000252	7e-06	0.000621	8e-06
Streptomyces tsukubensis	Bacteria	35.4839	0.00016	0.000282	0.000152	6.8e-05	0.000138	9.8e-05	9.5e-05	0.000284	0.000173	0.000134	0.000187	9.5e-05	0.000264	0.000294	0.000204	3.8e-05	7.8e-05
Kribbella flavida	Bacteria	21.5054	0.00016	9e-06	4e-06	4.1e-05	1.4e-05	0.00037	0	0.000816	5.4e-05	0.000296	2.1e-05	2.4e-05	9.9e-05	1.3e-05	0.000237	0.000529	3.1e-05
Corynebacterium riegelii	Bacteria	21.5054	0.00016	0.000231	3.2e-05	0.0003	7e-06	3e-06	0.00017	0.000263	0.000257	0.000244	7.4e-05	0.000182	0.000342	3.6e-05	0.000375	0	9e-06
Burkholderia sp. MS455	Bacteria	15.0538	0.00016	1.7e-05	3e-05	0	2.1e-05	0.000567	0.000553	0	5.5e-05	0.000135	0.000185	3e-06	1.1e-05	0.000387	3.1e-05	0.000498	4.5e-05
Mycolicibacterium litorale	Bacteria	27.957	0.000159	6.6e-05	6.2e-05	4.3e-05	1.4e-05	0.00061	0.000166	0.000139	0.000158	0.000232	8.5e-05	0.000122	0.000109	4.3e-05	0.000505	0.00012	3.9e-05
Leuconostoc lactis	Bacteria	21.5054	0.000159	0.000174	8.4e-05	0.000216	1.7e-05	7.1e-05	5.5e-05	0.00028	0.000376	0.000215	0.000102	0.000187	0.000318	6.8e-05	0.000144	0.000155	7.3e-05
Bradyrhizobium sp.	Bacteria	13.9785	0.000159	6e-06	0.000202	0	9.4e-05	0.000599	0	2.5e-05	0.000341	0.000137	0.000181	2e-05	5.8e-05	6.4e-05	0.00033	0.000248	0.000213
Desulfobulbus oralis	Bacteria	25.8065	0.000159	6e-06	0.000203	0.000114	3e-05	7.3e-05	5.1e-05	0.000741	0.000109	0.000177	0.00014	5.4e-05	3.4e-05	7.9e-05	0.000221	0.000385	0.000164
Acetivibrio saccincola	Bacteria	30.1075	0.000159	0.000218	6.5e-05	0.000355	3.8e-05	3.7e-05	0.000166	5e-05	0.000316	0.000136	0.000182	0.000126	0.000228	0.000147	0.000137	0.000243	6.8e-05
Synechococcus sp. JA-2-3B a(2-13)	Bacteria	22.5806	0.000158	0.000197	6.3e-05	0.000232	2e-06	0.000123	0.000157	0.000343	0.00015	0.000163	0.000154	1.5e-05	9.8e-05	0.000109	0.000313	0.000384	1.6e-05
Roseomonas sp. OT10	Bacteria	22.5806	0.000158	1.1e-05	0.00015	9e-06	3.2e-05	0.000172	0	0.000871	8.1e-05	0.000218	9.7e-05	3e-05	0.000106	3.9e-05	9.3e-05	0.000609	5e-05
Stappia indica	Bacteria	21.5054	0.000158	0.000189	3.3e-05	2.8e-05	9e-06	9e-06	0	0.000995	5.1e-05	0.000277	3.6e-05	2e-05	5.8e-05	0.000153	4.4e-05	0.000646	1.9e-05
Aeromicrobium yanjiei	Bacteria	17.2043	0.000158	1.4e-05	2.3e-05	0	8e-06	7.4e-05	3.4e-05	0.001123	4.6e-05	0.000272	4.1e-05	4.7e-05	7.2e-05	8e-06	1.9e-05	0.000776	0
Cedecea lapagei	Bacteria	23.6559	0.000158	1e-05	0.000488	3.8e-05	0.000246	1.7e-05	0.000285	3.6e-05	0.000189	5.5e-05	0.000263	6.8e-05	9.4e-05	0.000451	1.8e-05	0.000307	4.1e-05
Brevibacillus marinus	Bacteria	24.7312	0.000158	2.5e-05	3.8e-05	7e-06	7e-05	8e-06	0.00011	0.000964	8.9e-05	0.00026	5.3e-05	7.8e-05	4.4e-05	7.1e-05	8.8e-05	0.00064	1e-05
Serratia rubidaea	Bacteria	21.5054	0.000157	0.000307	6.5e-05	0.000123	0.000165	6.1e-05	2.1e-05	0.000125	0.000369	0.000107	0.000207	0.000188	6e-05	0.000273	5.4e-05	0.000323	6e-05
Desulforamulus ruminis	Bacteria	27.957	0.000157	3.8e-05	0.000143	5.1e-05	0.00013	0.000118	4.7e-05	0.000475	0.000276	0.000166	0.000147	0.000175	0.000141	0.000186	0.000114	0.000259	7e-05
Radiobacillus deserti	Bacteria	30.1075	0.000157	3.1e-05	7.2e-05	7.7e-05	8e-05	9.4e-05	0.000605	2.1e-05	0.000249	6.9e-05	0.000247	0.000107	0.000525	5.6e-05	9.2e-05	6e-05	8.3e-05
Anaerococcus obesiensis	Bacteria	24.7312	0.000157	0.000273	5.4e-05	0.000141	2.7e-05	5.8e-05	0.000251	0.000127	0.000304	0.000201	0.000112	0.000176	0.000348	8.8e-05	0.000179	8.2e-05	6e-05
Mycolicibacterium anyangense	Bacteria	16.129	0.000156	2.4e-05	0	0.000204	0	1e-06	5.9e-05	0.00086	0.000133	0.000252	5.9e-05	5.7e-05	7e-05	6.9e-05	0.000142	0.000583	0
Paenibacillus sp. sptzw28	Bacteria	27.957	0.000156	0.000195	0.00016	3.5e-05	6.8e-05	2.7e-05	0.000206	0.000205	0.000354	9.5e-05	0.000218	0.000215	0.000247	0.000212	0.000199	5.5e-05	1.7e-05
Aliarcobacter butzleri	Bacteria	24.7312	0.000156	1.6e-05	9.8e-05	0.000246	3.7e-05	1.1e-05	0.000567	0.000202	6.2e-05	0.000273	3.5e-05	0.000465	0.000215	5.9e-05	7.2e-05	0	0.00013
Colwellia psychrerythraea	Bacteria	25.8065	0.000156	0.000378	3.5e-05	0.000137	3.3e-05	8.3e-05	0.000283	1.3e-05	0.000252	0.000121	0.000191	0.00017	6.5e-05	5.2e-05	0.00029	0.000206	0.000139
Pectinatus frisingensis	Bacteria	23.6559	0.000156	9.3e-05	5.1e-05	2.2e-05	0.000653	1.6e-05	4.8e-05	7.9e-05	0.000259	7.9e-05	0.000234	7.8e-05	0.000185	6.4e-05	9.4e-05	0.000476	2e-05
Cronobacter malonaticus	Bacteria	19.3548	0.000155	1.4e-05	0.000444	8.5e-05	0.000152	5.7e-05	0.000278	0.000193	7.2e-05	7.6e-05	0.000236	6.4e-05	0.000112	0.00034	3.2e-05	0.000362	3.9e-05
Brevundimonas diminuta	Bacteria	19.3548	0.000155	1.9e-05	0.000155	1.8e-05	0.000113	2.8e-05	0.000157	0.000646	0.000145	7.5e-05	0.000236	0.000137	0.000438	5.4e-05	0.000172	6.4e-05	5e-05
Paenibacillus dendritiformis	Bacteria	29.0323	0.000155	3.2e-05	7.3e-05	6.5e-05	0.000141	0.000142	0.000499	6.2e-05	0.000203	0.000151	0.000158	0.000431	0.000213	4.2e-05	0.000217	0	2.9e-05
Rahnella aquatilis	Bacteria	32.2581	0.000154	0.000207	6.3e-05	2.5e-05	7.9e-05	9.9e-05	5.8e-05	0.000215	0.000478	0.000136	0.000173	8e-05	0.000109	0.000255	0.000252	9.9e-05	0.000138
Massilia putida	Bacteria	30.1075	0.000154	1.1e-05	0.000185	6.6e-05	6e-05	1.7e-05	0.000263	0.000345	0.000307	0.000163	0.000145	0.000252	0.000133	6.7e-05	9.9e-05	0.000207	0.000163
Bacillus sp. FJAT-18017	Bacteria	31.1828	0.000154	6.3e-05	0.000108	0.000453	3.7e-05	1.5e-05	0.000176	6.2e-05	0.000302	0.000127	0.000181	0.000129	0.000225	9.6e-05	0.000193	0.000175	9.7e-05
Burkholderia glumae	Bacteria	24.7312	0.000154	4.4e-05	0.000109	7.3e-05	2.4e-05	2.6e-05	0.000501	7e-05	0.00037	0.000128	0.00018	0.000418	0.000162	4.9e-05	0.000148	4e-06	0.000146
Staphylococcus gallinarum	Bacteria	23.6559	0.000154	0.000157	0.000227	4.6e-05	0.000121	0.000126	0.000118	5e-06	0.000429	0.000177	0.00013	0.000152	9e-05	8.8e-05	0.000222	2.4e-05	0.000339
Georgenia yuyongxinii	Bacteria	22.5806	0.000154	8.1e-05	2.1e-05	2.1e-05	8.5e-05	1.8e-05	0.000235	0.000669	0.00012	0.000198	0.000109	0.000115	0.000123	2.1e-05	0.000238	0.000401	4e-06
Bifidobacterium asteroides	Bacteria	29.0323	0.000153	0.000118	9.1e-05	0.000107	9e-05	9.4e-05	6.1e-05	0.000418	0.000259	0.000182	0.000125	0.000172	0.00036	8.4e-05	0.000157	1.1e-05	0.000129
Bacillus sp. WP8	Bacteria	16.129	0.000153	0.000668	9e-06	0.000457	7e-06	1e-06	6e-06	5e-06	3.6e-05	0.000281	2.3e-05	2e-05	5.7e-05	0.000917	8e-06	0	5e-06
Candidatus Minimicrobia vallesae	Bacteria	25.8065	0.000153	4.9e-05	0.000237	8e-05	2e-05	0.000289	0.000106	0.00025	0.000216	0.000165	0.000141	6.9e-05	0.000244	5.3e-05	0.000395	0.000112	2.9e-05
Erysipelothrix larvae	Bacteria	23.6559	0.000153	4e-05	9e-06	0.000192	0.000279	3.4e-05	1.2e-05	0.000541	0.000126	0.000175	0.00013	0.000252	5.2e-05	4e-05	5.1e-05	0.00036	0.000157
Proteus vulgaris	Bacteria	29.0323	0.000153	3.7e-05	0.000157	6.2e-05	0.00013	0.000149	0.000258	0.000263	0.000179	0.000131	0.000175	0.000223	9.5e-05	0.000148	0.000111	0.000258	8.7e-05
Aneurinibacillus soli	Bacteria	31.1828	0.000153	4.2e-05	9.5e-05	0.000156	0.000123	9.7e-05	0.00022	0.000244	0.000245	0.00011	0.000197	0.000166	0.000186	0.000134	0.000282	3.2e-05	0.000115
Streptomyces buecherae	Bacteria	25.8065	0.000153	1.9e-05	9.3e-05	0.000114	1.7e-05	3.9e-05	0.000106	0.000687	0.000182	0.000206	9.9e-05	9.1e-05	0.000105	0.000102	6e-05	0.000509	4e-05
Paenibacillus lycopersici	Bacteria	31.1828	0.000153	2.7e-05	8.8e-05	4.1e-05	0.000316	4.5e-05	0.000106	0.000294	0.000306	0.000162	0.000143	0.000193	0.000154	8.1e-05	0.000295	0.000182	4e-06
Amycolatopsis sp. CA-230715	Bacteria	23.6559	0.000152	9.3e-05	5.2e-05	2.6e-05	2e-06	4.9e-05	1.2e-05	0.00076	0.000255	0.000233	6.9e-05	4.5e-05	0.000189	7e-05	9.3e-05	0.000462	3.5e-05
Thermaerobacter sp. PB12/4term	Bacteria	26.8817	0.000152	6.5e-05	0.000342	2.1e-05	4.5e-05	1.2e-05	0.000227	0.000419	0.000137	0.000138	0.000166	4.2e-05	0.000245	8.6e-05	0.000208	0.000285	2.9e-05
Haloactinobacterium kanbiaonis	Bacteria	23.6559	0.000152	4.6e-05	0.000114	2.3e-05	4e-06	0.000119	0.000277	0.00057	8.8e-05	0.00018	0.000123	7.4e-05	0.000106	8e-06	0.00028	0.000333	8.4e-05
Xanthomonas arboricola	Bacteria	23.6559	0.000152	6.2e-05	6e-06	5.7e-05	3.1e-05	3e-06	3.2e-05	0.000875	0.000184	0.000232	6.9e-05	3.4e-05	0.000112	8.1e-05	7.4e-05	0.000568	2.4e-05
Pseudoalteromonas luteoviolacea	Bacteria	29.0323	0.000152	0.000297	2.9e-05	7.1e-05	0.000196	3.4e-05	0.000149	1.5e-05	0.00039	0.000163	0.00014	0.000124	4.1e-05	0.000248	0.000221	9.3e-05	0.000193
Microbacterium esteraromaticum	Bacteria	19.3548	0.000151	5.5e-05	1.4e-05	0.000212	1.6e-05	2e-05	9.9e-05	0.000741	7.6e-05	0.000213	8.7e-05	5.6e-05	8.7e-05	5e-06	8.1e-05	0.000652	0
Methylobacterium aquaticum	Bacteria	26.8817	0.000151	3.6e-05	9e-05	4.6e-05	5e-05	0.000115	3.8e-05	0.000524	0.000327	0.000203	9.7e-05	6.4e-05	0.000269	5.6e-05	0.000146	0.000331	2.2e-05
Paenibacillus terrae	Bacteria	26.8817	0.00015	6.2e-05	0.000104	1.4e-05	1.4e-05	6.8e-05	2.9e-05	0.000785	0.000174	0.00024	5.9e-05	8.6e-05	0.000101	6e-05	0.000128	0.000481	3.1e-05
Vibrio fluvialis	Bacteria	29.0323	0.00015	0.000237	8.2e-05	0.000142	5e-05	9.4e-05	5.7e-05	3.1e-05	0.000489	0.000131	0.00017	0.000103	0.000183	0.000257	0.000191	0.00015	3e-05
Brucella anthropi	Bacteria	22.5806	0.00015	9.2e-05	0.000146	0.000121	0.000183	2.5e-05	0.0001	0.000241	0.000298	0.000129	0.000171	0.000278	0.000329	0.000111	0.000146	0	3.7e-05
Kocuria rhizophila	Bacteria	22.5806	0.000149	6.1e-05	0.000218	0.000163	1.8e-05	1.4e-05	0.00031	0.000105	0.000314	0.000112	0.000187	0.000308	0.000179	0.000145	0.00017	0	0.000104
Tomitella gaofuii	Bacteria	13.9785	0.000149	1.7e-05	3.3e-05	3.2e-05	6e-06	1.4e-05	0	0.001135	2e-05	0.000252	4.4e-05	3.8e-05	0.000116	2e-06	2.8e-05	0.000686	0
Leminorella richardii	Bacteria	23.6559	0.000149	8.9e-05	2.4e-05	9.6e-05	4.2e-05	5e-06	0.000572	2.9e-05	0.000306	6.9e-05	0.000231	2.1e-05	0.000596	0.00016	7.4e-05	2.7e-05	1e-05
Nostoc sp. ATCC 53789	Bacteria	25.8065	0.000149	0.000197	9.9e-05	0.000287	0.000143	0.000173	6e-05	1.2e-05	0.000201	0.000182	0.000115	6.4e-05	0.000239	0.000166	0.00013	0.00025	4.2e-05
Trueperella pyogenes	Bacteria	26.8817	0.000149	0.00023	0.000177	3.5e-05	5.1e-05	9.3e-05	7.6e-05	0.000315	0.000232	0.000185	0.000112	0.000188	0.000249	5.8e-05	0.000193	0.000125	7.1e-05
Tolumonas auensis	Bacteria	32.2581	0.000149	0.000236	1.7e-05	7e-05	2.9e-05	9.2e-05	9.6e-05	0.0003	0.00034	0.000103	0.000195	0.000251	9.8e-05	0.0001	0.000252	0.000176	1.6e-05
Leptothrix cholodnii	Bacteria	22.5806	0.000149	1.3e-05	0.00015	2.1e-05	4e-06	6.3e-05	1.3e-05	0.000949	4.3e-05	0.000251	4.4e-05	2.7e-05	3.5e-05	2.8e-05	0.000105	0.000605	6.9e-05
Gordonia sp. KTR9	Bacteria	17.2043	0.000149	8.2e-05	0.000154	0	3e-06	2e-06	0.000117	0.000772	0.000112	0.000247	4.8e-05	1.1e-05	4.9e-05	5.6e-05	0.000151	0.000573	3.1e-05
Lacunisphaera limnophila	Bacteria	16.129	0.000148	2.3e-05	0	0.000144	1.5e-05	3e-06	6.4e-05	0.000913	6.4e-05	0.000226	6.9e-05	8e-05	2.2e-05	5.3e-05	2.3e-05	0.000664	3.2e-05
Streptomyces sp. BH-MK-02	Bacteria	24.7312	0.000148	1.6e-05	9.2e-05	0	2.1e-05	4e-05	0.000247	0.000765	4.7e-05	0.000205	9.1e-05	5.2e-05	0.000103	1.2e-05	0.00023	0.000439	3e-05
Nonomuraea sp. ATCC 55076	Bacteria	25.8065	0.000148	9e-05	0.000146	2.5e-05	6.6e-05	0.000101	9.7e-05	0.00061	8.8e-05	0.000222	7.3e-05	7.5e-05	0.000114	7.4e-05	0.000142	0.000417	5.5e-05
Desulfofarcimen acetoxidans	Bacteria	30.1075	0.000148	5.6e-05	4.1e-05	0.000258	0.000201	0.000204	0.000191	7.8e-05	0.000133	0.000121	0.000176	0.000313	0.000139	7.9e-05	0.000195	9.5e-05	7e-05
Legionella waltersii	Bacteria	11.828	0.000148	0.000235	0	5.7e-05	0	0.000516	0	0	0.00034	0.000155	0.000141	0.000173	0.000114	0.000257	0.000181	6e-05	0.000119
Caldibacillus thermoamylovorans	Bacteria	25.8065	0.000148	7.8e-05	1.9e-05	6e-06	0.00026	5.2e-05	0.000137	0.000373	0.000256	0.000139	0.000157	0.000318	7.1e-05	0.00011	3.2e-05	0.000254	0.00011
Beutenbergia cavernae	Bacteria	20.4301	0.000148	5.3e-05	7.6e-05	3.1e-05	9e-06	1.1e-05	2.3e-05	0.000982	5.7e-05	0.000247	4.7e-05	2.7e-05	8.3e-05	1.3e-05	8.5e-05	0.000614	4.2e-05
Nanchangia anserum	Bacteria	22.5806	0.000148	0.000352	1.6e-05	6.9e-05	2e-05	2.9e-05	0.000349	0.000157	0.000171	0.00016	0.000136	0.000318	0.000423	2.9e-05	6.8e-05	0	4.6e-05
Micromonospora endophytica (Xie et al. 2001) Li et al. 2019	Bacteria	18.2796	0.000148	1.6e-05	4.2e-05	2.2e-05	4e-06	1.7e-05	6.4e-05	0.001053	2.2e-05	0.000259	3.4e-05	7.2e-05	4.7e-05	6e-06	3.5e-05	0.000701	3e-06
Sporomusa termitida	Bacteria	26.8817	0.000148	0.000179	0.000128	4e-05	4.8e-05	1.1e-05	7.8e-05	5.3e-05	0.000634	0.000134	0.000161	8.8e-05	0.000154	0.000263	0.000301	1.8e-05	7.3e-05
Paenibacillus sp. FSL H7-0357	Bacteria	31.1828	0.000148	9.8e-05	6.5e-05	0.00019	4.5e-05	7.5e-05	0.000131	0.000322	0.000255	0.000185	0.00011	8.9e-05	0.000186	0.000115	0.00014	0.000205	0.000143
Dermacoccus sp. PAMC28757	Bacteria	21.5054	0.000148	5.3e-05	4.3e-05	0	1.4e-05	5.1e-05	3e-06	0.000969	9.8e-05	0.000243	5e-05	3.3e-05	7.2e-05	3.3e-05	6.4e-05	0.000598	6.3e-05
Bacillus sp. S3	Bacteria	30.1075	0.000147	0.000467	6e-05	8e-06	2.6e-05	2.8e-05	0.000103	0.000256	0.000225	0.000144	0.000151	9.3e-05	0.000217	0.000305	0.000109	5e-05	0.000125
Erysipelothrix sp. HDW6C	Bacteria	22.5806	0.000147	0.00042	3.3e-05	4.8e-05	0.00042	5.2e-05	1e-05	2.2e-05	0.000142	3.1e-05	0.000266	0.000393	0.000283	0.000153	2.9e-05	0	4.1e-05
Thermomonospora curvata	Bacteria	21.5054	0.000147	2.8e-05	0.000133	1.6e-05	1.6e-05	8.7e-05	2.4e-05	0.000796	0.000127	0.000228	6.4e-05	4.3e-05	0.000103	6e-06	0.000108	0.000485	0.000114
Kovacikia minuta	Bacteria	25.8065	0.000147	0.000464	0.000103	0.000151	2.2e-05	1.5e-05	6.1e-05	9e-06	0.00033	0.000166	0.000127	0.000185	0.000202	0.000192	0.000299	0	1e-05
Effusibacillus dendaii	Bacteria	22.5806	0.000147	1.2e-05	7.1e-05	2.6e-05	3.7e-05	6e-06	7.8e-05	0.000948	5e-05	0.000269	2.1e-05	4.8e-05	2.2e-05	2.9e-05	4.6e-05	0.000698	1.5e-05
Bacillus sp. Y1	Bacteria	33.3333	0.000146	4.4e-05	0.000133	6.1e-05	4.9e-05	5.7e-05	0.000344	0.000122	0.000358	0.000164	0.000129	0.000177	8.9e-05	6e-05	0.000209	0.0002	0.000135
Lactobacillus taiwanensis	Bacteria	22.5806	0.000146	0.00018	0.000252	0.000392	0.000104	3.1e-05	8e-05	1.9e-05	0.00012	8.9e-05	0.000205	8.7e-05	3.7e-05	0.000586	3.2e-05	1.2e-05	0.000177
Alteromonas mediterranea	Bacteria	20.4301	0.000146	5e-06	0.000227	0.000244	0.000103	1.8e-05	0.000179	0.000312	0.000109	0.0001	0.000194	0.000183	0.000184	0.000119	4.5e-05	0.000339	7e-06
Polyangium aurulentum	Bacteria	25.8065	0.000146	3.1e-05	8.5e-05	1.6e-05	1.5e-05	0.000101	3.4e-05	0.000783	0.000148	0.000244	4.6e-05	2.8e-05	9.7e-05	4.6e-05	0.000109	0.000561	1.7e-05
Chryseobacterium sp. SC2-2	Bacteria	29.0323	0.000146	0.000208	4.4e-05	0.000151	0.000376	7e-05	0.000121	3.8e-05	0.000137	0.000119	0.000174	8e-05	0.000389	0.00028	6.5e-05	5.5e-05	2e-05
Rhizorhabdus wittichii	Bacteria	13.9785	0.000146	3.5e-05	2.9e-05	2e-05	8e-06	6e-06	0	0.001104	2.5e-05	0.000274	1.5e-05	3e-05	6.6e-05	8e-06	3.9e-05	0.000617	8.9e-05
Mycolicibacterium vaccae	Bacteria	20.4301	0.000146	2.1e-05	6.1e-05	1e-05	5e-06	9e-06	0	0.001029	9.2e-05	0.000256	3.3e-05	2.5e-05	4.7e-05	4.3e-05	4.2e-05	0.000667	3.2e-05
Nocardioides sp. S5	Bacteria	23.6559	0.000146	2e-05	4e-05	0.000208	2.8e-05	3.3e-05	8e-06	0.000625	0.000226	0.000195	9.5e-05	7.2e-05	0.000173	2.2e-05	5.9e-05	0.000461	6.9e-05
Amycolatopsis pretoriensis	Bacteria	25.8065	0.000146	0.000221	8.5e-05	6e-06	1e-05	0.000104	4e-06	0.00069	8e-05	0.000228	6.1e-05	0.000159	8.1e-05	2.9e-05	0.0001	0.000451	4e-05
Lactobacillus acetotolerans	Bacteria	22.5806	0.000145	3e-05	8.6e-05	0.000584	2.2e-05	0.000247	8e-06	7.8e-05	9.3e-05	6e-05	0.000233	3e-05	0.000238	0.000545	2.6e-05	0	7.7e-05
Schleiferilactobacillus harbinensis	Bacteria	27.957	0.000145	7.5e-05	0.000114	1.3e-05	8.2e-05	6.2e-05	4.7e-05	0.000557	0.00024	0.000196	9.3e-05	0.000114	5.5e-05	0.000105	0.000136	0.000392	6.1e-05
Enterobacter sp. JBIWA003	Bacteria	11.828	0.000145	0	0.000117	9.7e-05	0.000311	0	0.000192	0.000397	6.3e-05	0.000107	0.000184	9.9e-05	0.000138	0.000114	0.000227	0.000286	0
Paenibacillus borealis	Bacteria	26.8817	0.000145	0.00015	0.000136	7.4e-05	0.000118	9e-05	3.9e-05	8.6e-05	0.000461	0.000127	0.000164	0.000119	0.000248	0.000238	0.000174	4e-05	6e-05
Amycolatopsis sp. FDAARGOS 1241	Bacteria	26.8817	0.000145	0.000168	5e-06	0.000113	2.5e-05	2.1e-05	1.4e-05	0.000749	9.1e-05	0.000197	9.2e-05	4.5e-05	0.000118	2.1e-05	0.00013	0.000495	3.7e-05
Cereibacter sphaeroides	Bacteria	32.2581	0.000145	4.9e-05	4.2e-05	5.3e-05	2.3e-05	9.6e-05	0.000141	0.000592	0.000183	0.000141	0.000148	0.00014	0.00022	7.9e-05	9.3e-05	0.000259	6.9e-05
Lawsonia intracellularis	Bacteria	21.5054	0.000145	1.6e-05	0.000309	4.8e-05	2e-06	2e-05	0.000115	0.000689	3e-05	0.000197	9.1e-05	4.9e-05	4.3e-05	4e-06	0.000294	0.000227	0.000227
Solidesulfovibrio carbinoliphilus	Bacteria	19.3548	0.000144	1.3e-05	0.000273	8.4e-05	2.3e-05	1.6e-05	0.000121	0.00067	2.3e-05	0.000103	0.000187	0.000112	8.8e-05	1.6e-05	0.000211	0	0.000423
Desulforapulum autotrophicum	Bacteria	26.8817	0.000144	1.6e-05	5.4e-05	0.000464	3.9e-05	9e-06	0.000227	0.000152	0.000182	0.000122	0.000167	0.000244	7.5e-05	7.4e-05	0.000366	2.1e-05	8.4e-05
Kutzneria sp. CA-103260	Bacteria	27.957	0.000144	3.7e-05	1.7e-05	9e-06	1.5e-05	0.000668	8e-06	0.000208	0.000175	0.000213	7.4e-05	3.3e-05	0.000109	1.3e-05	0.000481	0.000181	2.6e-05
Caballeronia sp. Lep1P3	Bacteria	20.4301	0.000144	2.5e-05	5.7e-05	8e-05	2e-06	1.5e-05	1e-05	0.000945	7e-05	0.000251	3.4e-05	4.4e-05	7.7e-05	1.3e-05	5.1e-05	0.000638	1.8e-05
Azospirillum sp. TSA2s	Bacteria	18.2796	0.000143	1e-05	5.3e-05	0.000565	6e-06	7.9e-05	0	0.000406	3.5e-05	9e-05	0.000198	1.1e-05	0.00011	0.000423	3.5e-05	0.000205	0.000103
Aquihabitans sp. Kera 3	Bacteria	20.4301	0.000143	3.2e-05	2.9e-05	0	7e-06	3.3e-05	4e-06	0.001048	4.9e-05	0.000258	2.6e-05	1.9e-05	2.2e-05	2.5e-05	3.3e-05	0.000705	3.2e-05
Crassaminicella sp. 143-21	Bacteria	26.8817	0.000143	0.000145	0.000238	4.5e-05	3.4e-05	4.1e-05	0.000266	0.000103	0.000283	0.000169	0.000116	0.000115	0.000171	0.000138	0.000353	3e-06	7.4e-05
Acidovorax sp. T1	Bacteria	15.0538	0.000143	2.4e-05	1.1e-05	2.9e-05	7e-06	2.7e-05	0	0.000971	0.00012	0.000235	4.9e-05	4.1e-05	4e-05	9.4e-05	9e-06	0.000636	2.3e-05
Atopobium sp. oral taxon 416	Bacteria	23.6559	0.000143	0.000214	0.000142	8.3e-05	0.000125	7.1e-05	5e-05	0.0001	0.000351	0.000126	0.000159	0.000182	0.000242	0.000113	0.000161	0	0.000156
Enterococcus sp. FDAARGOS_375	Bacteria	17.2043	0.000142	9e-06	5.5e-05	0	0.0004	2.3e-05	0	1.5e-05	0.000612	0.000163	0.000121	0.000322	3e-05	0.000297	4.3e-05	0.000166	2.8e-05
Phreatobacter stygius	Bacteria	20.4301	0.000142	4.3e-05	0.000104	8e-06	1.2e-05	2.5e-05	0	0.000874	0.000125	0.000225	5.7e-05	2.1e-05	0.000118	4.8e-05	7.1e-05	0.000549	2.6e-05
Amycolatopsis japonica	Bacteria	21.5054	0.000142	0.000238	0.000108	0.000217	2e-06	3.8e-05	2.5e-05	0.000405	0.000117	0.000198	8.5e-05	1.5e-05	0.000195	0.000206	0.000106	0.000324	4e-06
Chromobacterium violaceum	Bacteria	29.0323	0.000142	2.9e-05	3.6e-05	0.000134	2.6e-05	1.1e-05	2e-05	0.000732	0.000178	0.000212	7e-05	8e-05	0.000111	6.5e-05	4.1e-05	0.000487	5.3e-05
Symmachiella dynata	Bacteria	22.5806	0.000142	1.8e-05	4.6e-05	1.4e-05	3.1e-05	7.1e-05	4e-06	0.000918	8e-05	0.000243	3.8e-05	3.7e-05	3.1e-05	2.3e-05	4.6e-05	0.000687	5e-06
Chryseobacterium indoltheticum	Bacteria	25.8065	0.000142	2.4e-05	3.7e-05	8.7e-05	7.1e-05	8.6e-05	7.1e-05	0.00066	0.000123	0.000185	9.7e-05	0.000123	6.7e-05	4e-05	5.5e-05	0.000524	2.7e-05
Actinocatenispora sera	Bacteria	22.5806	0.000141	3.6e-05	3.6e-05	0	4.8e-05	1.3e-05	6.7e-05	0.000859	0.000115	0.000238	4.3e-05	8.5e-05	3.6e-05	5.8e-05	5.2e-05	0.000586	1.8e-05
Paenibacillus guangzhouensis	Bacteria	26.8817	0.000141	0.000166	0.000178	7.4e-05	5.6e-05	1.7e-05	0.000107	7e-05	0.000463	0.00012	0.000163	0.000199	0.000117	0.00021	0.000291	1.9e-05	2.5e-05
Alkaliphilus oremlandii	Bacteria	31.1828	0.000141	0.000183	0.000112	0.000117	0.000142	0.000116	7.6e-05	0.000111	0.000263	0.000111	0.000172	0.000194	0.00011	0.000225	0.000142	5.7e-05	0.000133
Frankia inefficax	Bacteria	24.7312	0.000141	3.8e-05	0	0.000289	1.1e-05	5.5e-05	4.3e-05	0.000622	8.5e-05	0.000169	0.000113	6.7e-05	7.3e-05	0.00022	2.9e-05	0.000459	4e-06
Sphingobacterium spiritivorum	Bacteria	34.4086	0.000141	3.7e-05	0.000139	0.000447	0.000168	1.1e-05	0.000126	6.4e-05	0.000127	8.6e-05	0.000197	0.00016	8.9e-05	5.1e-05	0.000407	3.8e-05	9e-05
Gemella sp. oral taxon 928	Bacteria	13.9785	0.00014	0.000338	2.9e-05	0.000131	0	0.000181	0.000128	0.000137	0.000161	0.000228	5.1e-05	0.000159	0.000247	1.9e-05	0.000283	0	0.000121
Listeria weihenstephanensis	Bacteria	29.0323	0.00014	6.6e-05	0.000324	5.3e-05	0.000325	5.2e-05	4.4e-05	1.3e-05	0.000265	0.000134	0.000147	0.000256	7.3e-05	0.000188	7.3e-05	1.8e-05	0.000246
Saccharothrix sp. 6-C	Bacteria	26.8817	0.00014	3.7e-05	2.7e-05	8.4e-05	2.3e-05	1.4e-05	4.2e-05	0.000823	0.000109	0.000225	5.3e-05	7.9e-05	9.8e-05	3.9e-05	3.7e-05	0.00053	4e-05
Macrococcus armenti	Bacteria	22.5806	0.00014	0.000111	0.000136	0.000153	0.000293	7e-06	9.1e-05	2.8e-05	0.000291	0.000111	0.000169	0.000299	0.000172	0.000151	0.000106	0	0.000123
Rhodococcus triatomae	Bacteria	17.2043	0.00014	3.1e-05	4e-06	0	1.8e-05	1.7e-05	6e-06	0.001059	3.8e-05	0.000253	2.5e-05	1.6e-05	3.9e-05	2.5e-05	1.1e-05	0.000701	2.5e-05
Saccharomonospora marina	Bacteria	18.2796	0.00014	1.8e-05	5.8e-05	4e-06	4e-06	3.8e-05	1.8e-05	0.000988	4.7e-05	0.000252	2.6e-05	1.9e-05	3.5e-05	3e-06	6.9e-05	0.000667	2.2e-05
Streptomyces bathyalis	Bacteria	19.3548	0.00014	2.5e-05	2.3e-05	1.1e-05	6e-06	0.0002	1.2e-05	0.000822	5.5e-05	0.000266	1e-05	2.5e-05	5.7e-05	6e-06	3.7e-05	0.000686	2e-06
Planococcus massiliensis	Bacteria	24.7312	0.00014	0.000308	2.4e-05	0.000318	4.1e-05	4e-06	3e-06	0.000183	0.00022	0.000167	0.000112	6e-05	6.7e-05	2.8e-05	0.000473	0.000102	8.9e-05
Bifidobacterium actinocoloniiforme	Bacteria	25.8065	0.000139	0.000142	6.9e-05	5e-06	4.6e-05	0.000146	0.000131	0.000394	0.000189	0.000171	0.000107	0.000206	0.000285	7.4e-05	0.000143	0	0.000123
Paenibacillus psychroresistens	Bacteria	30.1075	0.000139	0.000188	9.8e-05	0.000231	0.000112	3.9e-05	8.8e-05	8.8e-05	0.000257	0.000122	0.000157	0.000162	0.000218	8.3e-05	0.000287	2.4e-05	5.5e-05
Arthrobacter crystallopoietes	Bacteria	24.7312	0.000139	6.2e-05	2.2e-05	3.7e-05	2.4e-05	6e-06	0.000157	0.000701	0.000129	0.000222	5.3e-05	0.000133	9e-05	4.2e-05	8.1e-05	0.000451	2.2e-05
Tistrella mobilis	Bacteria	20.4301	0.000139	0.000134	5.9e-05	0.000446	9e-06	5e-06	3.5e-05	0.000345	8e-05	0.000251	2.4e-05	6.2e-05	5.4e-05	0.000125	5.8e-05	0.000227	0.0003
Massilia sp. HC52	Bacteria	27.957	0.000139	0.000239	0.000194	0.000101	1.9e-05	5.3e-05	0.000185	0.000144	0.000183	0.000137	0.00014	0.000215	0.00012	0.000244	0.000135	2.7e-05	0.00011
Paenibacillus sp. CAA11	Bacteria	29.0323	0.000139	0.000166	8.8e-05	0.000159	8.2e-05	3.7e-05	4.5e-05	4.6e-05	0.000468	0.000121	0.000156	0.000109	0.000242	0.000226	0.000208	1.7e-05	3.8e-05
Enterobacter sp. RHBSTW-00175	Bacteria	12.9032	0.000139	0	0.000482	5.9e-05	0.000191	1e-05	0.000333	1.7e-05	6.4e-05	1.3e-05	0.000267	4.7e-05	4.9e-05	0.000432	8e-06	0.000293	3.3e-05
Geomonas subterranea	Bacteria	19.3548	0.000138	0.000126	9e-06	0	1e-05	1.5e-05	0	0.00068	0.000291	0.000199	7.6e-05	2.2e-05	0.000107	0.000123	0.000111	0.000451	7e-06
Candidatus Profftia tarda	Bacteria	24.7312	0.000138	5e-06	0.000335	9.9e-05	0.000193	7.1e-05	0.000204	2.7e-05	0.000197	3.9e-05	0.00024	3.7e-05	0.00013	0.000396	7.5e-05	0.000202	1.6e-05
Kosakonia sp. CCTCC M2018092	Bacteria	13.9785	0.000138	3e-06	0.000573	5.2e-05	0.000194	2.3e-05	0.000235	3.2e-05	5.8e-05	4.2e-05	0.000237	4.3e-05	4.8e-05	0.000369	0.000146	0.000215	3.2e-05
Halobacillus halophilus	Bacteria	29.0323	0.000138	0.000201	0.000119	0.000106	4.7e-05	2.3e-05	0.000163	4.9e-05	0.000389	0.000125	0.000152	8.6e-05	0.00017	0.00023	0.000206	0.000118	2.7e-05
Dermabacter vaginalis	Bacteria	26.8817	0.000138	0.000143	3.5e-05	6.8e-05	7e-06	0.000103	6.1e-05	0.000573	0.000135	0.000224	5.1e-05	0.000101	0.000165	4e-05	0.00011	0.000335	6.3e-05
Paenibacillus sp. DR312	Bacteria	15.0538	0.000138	0.000264	9.3e-05	0	8.5e-05	0.000126	9.2e-05	0	0.000427	0.000148	0.000129	0.000198	0.000285	0.000102	0.000147	0	9.6e-05
Leclercia sp. W17	Bacteria	10.7527	0.000138	5e-06	0.000267	3.5e-05	0.00011	4e-06	0.00011	0.000435	0.000185	0.000111	0.000166	2.8e-05	9.1e-05	0.000238	1.1e-05	0.000466	0
Sphingobacterium psychroaquaticum	Bacteria	15.0538	0.000138	3.3e-05	8e-06	7.2e-05	2e-06	0	0.000714	0.000253	1e-05	0.000217	5.7e-05	0.000439	5.5e-05	9.7e-05	8.8e-05	0.000163	0
Jiangella sp. DSM 45060	Bacteria	25.8065	0.000138	4.1e-05	3.3e-05	0.000116	5.8e-05	3.6e-05	1.9e-05	0.00072	0.000112	0.000188	8.7e-05	5.2e-05	0.000108	6.8e-05	7e-05	0.000458	5.7e-05
Corynebacterium urealyticum	Bacteria	21.5054	0.000138	6e-05	8.5e-05	0	0	1.2e-05	3.3e-05	0.000878	8.8e-05	0.000237	3.7e-05	3.2e-05	0.000138	2.1e-05	7.1e-05	0.000524	1.9e-05
Cellulomonas sp. PSBB021	Bacteria	18.2796	0.000138	6e-05	8.7e-05	6e-06	1.4e-05	0.00011	3.2e-05	0.000744	9.3e-05	0.000203	7.1e-05	5.2e-05	0.000138	1.7e-05	8.9e-05	0.000417	9.4e-05
Paenibacillus sp. FSL R7-0331	Bacteria	26.8817	0.000138	0.000128	4.3e-05	4.1e-05	0.000105	1.4e-05	0.000101	7.5e-05	0.000574	0.000141	0.000134	0.000211	0.000145	0.000219	0.000104	0.000126	3.6e-05
Syntrophobacter fumaroxidans	Bacteria	25.8065	0.000138	0.000289	7.6e-05	1.8e-05	1.1e-05	2.4e-05	0	0.000155	0.000521	6.3e-05	0.000214	2.2e-05	8.8e-05	4.3e-05	0.000257	0.000354	4.2e-05
Tetragenococcus koreensis	Bacteria	26.8817	0.000137	2.7e-05	7.5e-05	0.000119	0.000304	4e-06	5.7e-05	0.000355	0.000166	6.4e-05	0.000213	0.000322	4.6e-05	0.000297	0.000124	0	6.6e-05
Agromyces soli	Bacteria	17.2043	0.000137	1.9e-05	0	0.000226	0.000477	8e-06	0.000101	0.000223	2.8e-05	7e-05	0.000206	0.000498	7.1e-05	5e-06	1e-05	0.000136	0.00011
Brachybacterium faecium	Bacteria	27.957	0.000137	4.9e-05	3.5e-05	4.4e-05	1.5e-05	0.000142	0.00011	0.000327	0.000374	0.000118	0.000157	0.000156	7.3e-05	0.000117	0.000134	0.000291	5e-05
Cohnella sp. MFER-1	Bacteria	25.8065	0.000137	9.5e-05	7.4e-05	3.1e-05	3.5e-05	6.7e-05	0.000351	0.000103	0.000327	0.000107	0.000167	0.000364	0.000192	0.000129	0.000124	0	2.6e-05
Rathayibacter sp. VKM Ac-2759	Bacteria	22.5806	0.000137	1.8e-05	3.7e-05	2.7e-05	1.4e-05	2.7e-05	4e-06	0.000951	6.8e-05	0.000244	2.7e-05	1.5e-05	8.5e-05	1.8e-05	3.4e-05	0.000606	4e-05
Bacillus glycinifermentans	Bacteria	31.1828	0.000136	0.000243	0.000141	0.000234	4.9e-05	5.2e-05	0.000119	2.5e-05	0.00022	0.00015	0.000123	0.000186	0.000185	0.000236	0.000139	3.5e-05	5.3e-05
Azospira restricta	Bacteria	25.8065	0.000136	2.5e-05	0.000148	0.000269	2e-06	7e-06	3.2e-05	0.000385	0.000244	0.000146	0.000127	4.2e-05	8.6e-05	0.000377	4.1e-05	0.000248	4.9e-05
Paenibacillus protaetiae	Bacteria	26.8817	0.000136	2.7e-05	0.00013	2.8e-05	6.5e-05	0.000136	9e-05	0.000576	6.8e-05	0.000203	6.7e-05	0.000106	4.7e-05	2.6e-05	0.000128	0.000462	2.9e-05
Kocuria palustris	Bacteria	21.5054	0.000136	4e-05	0.000139	0.000175	4e-06	2.6e-05	3.4e-05	0.000673	3.8e-05	0.000195	7.4e-05	5.6e-05	0.000183	5e-06	8.6e-05	0.000401	5.9e-05
Bradyrhizobium betae	Bacteria	17.2043	0.000135	1.8e-05	8.2e-05	8.7e-05	2e-06	7e-06	0.000174	0.000696	5.6e-05	0.000189	8.1e-05	0.00013	8.7e-05	3.9e-05	6.2e-05	0.000475	7e-06
Erwinia tracheiphila	Bacteria	17.2043	0.000135	2.2e-05	0.000682	3.4e-05	0.000124	2e-06	0.000236	2.4e-05	4e-05	3e-05	0.000243	3.6e-05	2.2e-05	0.000319	4.9e-05	0.000392	9e-06
Clostridium scatologenes	Bacteria	27.957	0.000135	0.000322	6.4e-05	0.000158	0.00019	0.000112	2.8e-05	3.2e-05	0.000155	0.000148	0.000122	0.00032	0.000267	9.7e-05	5.7e-05	0	7.8e-05
Mycobacterium simiae	Bacteria	25.8065	0.000135	2.1e-05	0.000112	0.000392	1.3e-05	2e-06	0.000126	0.000299	0.000125	0.000213	5.5e-05	5.7e-05	6.7e-05	4.9e-05	9.4e-05	0.000296	0.000232
Peribacillus muralis	Bacteria	26.8817	0.000135	5e-05	9.1e-05	0.000311	0.000169	3.4e-05	1.2e-05	0.00029	0.000128	0.000115	0.000155	0.000164	4.6e-05	6.5e-05	0.000428	0	9.9e-05
Paenibacillus bovis	Bacteria	29.0323	0.000135	6.6e-05	0.000135	0.000116	0.000283	2.5e-05	0.00012	2.3e-05	0.0003	9.7e-05	0.000173	0.000325	0.000112	0.000125	0.000108	3.5e-05	0.000114
Buttiauxella ferragutiae	Bacteria	13.9785	0.000135	0	0.000505	4e-05	0.000218	1e-06	0.000247	9e-06	0.000108	2.4e-05	0.000247	3.4e-05	6.6e-05	0.000399	5.8e-05	0.000277	0
Myxococcus xanthus	Bacteria	29.0323	0.000134	0.000131	0.000195	6e-05	3.1e-05	0.000113	0	0.000472	0.000111	0.000138	0.000131	4e-05	0.000209	8.2e-05	0.000143	0.000254	6.6e-05
Streptomyces alboniger	Bacteria	24.7312	0.000134	2.8e-05	4.1e-05	0.000139	2e-06	2.6e-05	0.00068	2.8e-05	0.000103	0.000191	7.6e-05	0.000403	5.1e-05	2.6e-05	7.4e-05	0.000146	0.000108
Nocardioides sp. HDW12B	Bacteria	22.5806	0.000134	9.6e-05	8e-05	2.9e-05	4e-06	4.5e-05	4.7e-05	0.000618	0.000185	0.000197	7e-05	5.7e-05	0.000137	7.3e-05	0.000103	0.000375	4.7e-05
Flavobacterium crocinum	Bacteria	23.6559	0.000134	2.1e-05	7e-06	4e-05	9.4e-05	0.000127	0.00027	0.000456	6e-05	0.000133	0.000135	8.7e-05	3.6e-05	3.7e-05	0.000207	0.000366	5.4e-05
Lysinibacillus sp. 2017	Bacteria	30.1075	0.000133	2.1e-05	6.4e-05	1.6e-05	9.4e-05	5.2e-05	5.6e-05	1.7e-05	0.000726	7.9e-05	0.000189	9.6e-05	0.000104	0.00019	4.7e-05	0.000337	2.9e-05
Paenibacillus sophorae	Bacteria	24.7312	0.000133	5.6e-05	7.5e-05	3.1e-05	0.000133	1e-05	1.7e-05	8e-05	0.000648	0.00015	0.000116	0.000197	0.000135	0.0002	0.000115	0.000103	6.1e-05
Alienimonas californiensis	Bacteria	25.8065	0.000133	1.1e-05	6.7e-05	2.1e-05	0.000107	7e-06	2.4e-05	0.000672	0.00019	0.000221	4.3e-05	9.3e-05	7.5e-05	7.8e-05	6.1e-05	0.000461	2.1e-05
Brochothrix thermosphacta	Bacteria	29.0323	0.000133	0.00015	3.5e-05	0.000182	0.000261	4.3e-05	0.000182	2e-05	0.000166	0.000128	0.000138	0.000197	3.9e-05	0.000116	0.00017	0.000165	0.000113
Thermincola potens	Bacteria	26.8817	0.000133	9.8e-05	0.000114	1.4e-05	2.5e-05	0.000246	4.7e-05	0.000195	0.000324	8.6e-05	0.000181	9.2e-05	0.000215	0.000355	9.9e-05	1.2e-05	5e-05
Treponema vincentii	Bacteria	25.8065	0.000133	5.1e-05	0.000123	0.000219	4.3e-05	9e-06	0.000163	8e-05	0.000366	0.000127	0.000138	0.000164	0.000106	0.000185	0.000271	0	7.9e-05
[truncated: 1,508 more rows]
