# Supplementary material
Source: Research Square preprint supplement (doi:10.21203/rs.3.rs-9927529/v1)
Supplement: Supplementary file 8 [file 7cea3990b06bd10e942c5cd2.xlsx]

## Sheet: Genome assemblies
Table S9 Genome assemblies
Donor	Milieu	Tissue	Species	N50 (kb)	NG50 (kb)	% of indentical	% alignment to reference
OD1	Mucosa	AscendingColon	Eggerthella-lenta	218469	348023	83.454	87.46
			Bifidobacterium-longum	88986	81978	81.222	86.8
		Duodenum	Bifidobacterium-longum	82727	82719	79.824	85.49
OD2	Lumen	DescendingColon	Collinsella-aerofaciens	97068	44815	79.004	73.18
		TransverseColon	Limosilactobacillus-fermentum	99454	57094	92.425	98.45
OD3	NA	NA	NA	NA	NA	NA	NA
OD4	Lumen	Duodenum	Eggerthella-lenta	114042	113344	85.613	85.95
OD5	Mucosa	DescendingColon	Enterocloster-bolteae	106914	89721	90.589	92.08
OD7	Lumen	DescendingColon	Bifidobacterium-longum	97461	88985	88.015	86.27
OD8	Lumen	Ileum	Bifidobacterium-longum	92761	92761	84.95	86.86
OD9	Mucosa	AscendingColon	Eggerthella-lenta	97060	87708	85.277	88.82
		DescendingColon	Escherichia-coli	143039	143039	99.362	96.8
	Lumen	Duodenum	Collinsella-aerofaciens	87976	40475	80.075	73.84
