# Supplementary material
Source: Research Square preprint supplement (doi:10.21203/rs.3.rs-9927529/v1)
Supplement: Supplementary file 9 [file 97c988d6647b6a731dd45145.xlsx]

## Sheet: Table SXX
Table S3.Variance explained by donor identity, intestinal segment, and intestinal milieu across microbial kingdoms based on PERMANOVA analysis of Bray–Curtis dissimilarities.
Kingdom	Variable	R2	F	p_value
Archaea	Donor	0.087	1.03	0.399
Archaea	Tissue	0.057	0.94	0.586
Archaea	Milieu	0.007	0.58	0.901
Bacteria	Donor	0.072	0.94	0.618
Bacteria	Tissue	0.053	0.97	0.508
Bacteria	Milieu	0.015	1.36	0.191
Fungi	Donor	0.125	1.72	0.005
Fungi	Tissue	0.045	0.86	0.649
Fungi	Milieu	0.008	0.8	0.544
Other	Donor	0.137	1.93	0.011
Other	Tissue	0.05	1	0.448
Other	Milieu	0.013	1.28	0.261
Viral	Donor	0.088	1.12	0.235
Viral	Tissue	0.09	1.61	0.017
Viral	Milieu	0.018	1.57	0.121
