# Supplementary material
Source: Research Square preprint supplement (doi:10.21203/rs.3.rs-9927529/v1)
Supplement: Supplementary file 11 [file 9a931423704d6de6b6ff8d5a.xlsx]

## Sheet: Mucosa score
Table S8-1. Pairwise microbial taxon correlations in musosa samples identified by CCrepe analysis
	Homo sapiens	Saccharomyces cerevisiae	Saccharomyces eubayanus	Saccharomyces paradoxus	1umovozyma castellii	1umovozyma dairenensis	Kluyveromyces marxianus	Kluyveromyces lactis	Eremothecium cymbalariae	Tetrapisispora blattae	Tetrapisispora phaffii	[Candida] glabrata	Zygosaccharomyces rouxii	Zygotorulaspora mrakii	Kazachstania africa1	Candida tropicalis	Candida dubliniensis	Candida albicans	Candida orthopsilosis	Scheffersomyces stipitis	Pichia kudriavzevii	Brettanomyces bruxellensis	Yarrowia lipolytica	Sugiyamaella lignohabitans	Saccharomycodes ludwigii	Botrytis cinerea	Fusarium poae	Fusarium graminearum	Fusarium vene1tum	Fusarium pseudograminearum	Fusarium oxysporum	Fusarium verticillioides	Fusarium fujikuroi	Fusarium musae	Purpureocillium takamizusanense	Drechmeria coniospora	Ustilaginoidea virens	Pochonia chlamydosporia	Colletotrichum higginsianum	Thermothelomyces thermophilus	Thermothielavioides terrestris	Neurospora crassa	Pyricularia grisea	Pyricularia oryzae	Pyricularia pennisetige1	Aspergillus oryzae	Aspergillus luchuensis	Aspergillus puulaauensis	Aspergillus chevalieri
Homo sapiens	1	0.443257	-0.202721	-0.223476	0.111206	-0.161082	-0.0144268	-0.215193	-0.161598	-0.195134	-0.216638	-0.217465	-0.211846	-0.217566	-0.215332	0.209427	0.139597	-0.289006	-0.0305796	-0.194077	0.476476	-0.178401	0.249068	0.117206	-0.118018	0.456913	0.440243	0.32528	0.323133	0.0164005	0.252271	0.432948	0.139622	0.491131	0.419747	0.446776	0.269355	0.226905	0.448969	0.386773	-0.0887726	0.334713	0.163241	-0.115081	0.162664	0.282865	0.512323	0.0985236	0.0358904
Saccharomyces cerevisiae	0.443257	1	0.0873376	0.0607665	0.443657	0.147174	0.295564	0.0881039	0.084698	0.0909916	0.0684082	0.0836021	0.0906956	0.0784867	0.0846011	0.340588	0.225669	-0.141629	0.0312437	0.049954	0.646545	0.0595379	0.167257	0.0856728	0.0635697	0.773397	0.346381	0.122219	0.297503	0.0873106	0.711786	0.718702	0.627346	0.102746	0.0181925	0.636741	-0.0278381	-0.0308672	0.0353942	-0.0447391	0.154347	0.0656911	-0.118266	-0.253806	-0.00410305	0.27272	0.486424	0.188146	0.188978
Saccharomyces eubayanus	-0.202721	0.0873376	1	0.991186	0.839552	0.98694	0.943385	0.999115	0.982801	0.99754	0.993484	0.999238	0.998864	0.99349	0.998494	0.0900372	-0.0122706	0.0479966	0.733767	0.975793	0.0725522	0.917437	0.355849	0.523731	0.949523	-0.0557691	-0.0998877	-0.11195	-0.0596209	0.473067	-0.0350689	-0.0552523	0.0219037	-0.0715852	-0.124616	0.0836802	-0.162366	0.172683	-0.0304571	-0.0711396	-0.0672286	0.125686	-0.0248535	-0.0784599	0.159844	-0.0699199	-0.0891046	0.105327	0.406136
Saccharomyces paradoxus	-0.223476	0.0607665	0.991186	1	0.831572	0.978773	0.934464	0.994074	0.990897	0.986879	0.984644	0.993531	0.990421	0.998331	0.988379	-0.0197979	-0.0191247	0.0518603	0.761972	0.981185	0.0710583	0.938705	0.386682	0.556117	0.960378	-0.0789844	-0.0716702	-0.084421	-0.0409696	0.507923	-0.0303685	-0.0362325	0.0396822	-0.0534383	-0.0892724	0.0943053	-0.123362	0.214026	0.0050308	-0.0346369	-0.071018	0.164229	0.0245687	-0.066105	0.183784	-0.0850916	-0.0865322	0.150226	0.424786
1umovozyma castellii	0.111206	0.443657	0.839552	0.831572	1	0.879983	0.94992	0.839633	0.854437	0.841343	0.82371	0.837183	0.844103	0.838497	0.834394	0.23908	0.200597	-0.0500207	0.678599	0.817653	0.520394	0.808074	0.522483	0.58439	0.828885	0.312614	0.251004	0.0813279	0.175131	0.536939	0.357193	0.364689	0.340037	0.174454	0.044757	0.505565	-0.0390005	0.296841	0.12503	0.0856482	-0.0864555	0.294558	0.046646	-0.187566	0.238793	-0.0204418	0.3151	0.279251	0.567165
1umovozyma dairenensis	-0.161082	0.147174	0.98694	0.978773	0.879983	1	0.966654	0.987248	0.979768	0.988774	0.983106	0.987064	0.988916	0.980922	0.987906	0.133692	0.0187052	0.0315582	0.773806	0.961889	0.143894	0.932594	0.431964	0.577954	0.94252	0.0205522	-0.0244809	-0.0588199	-0.00900405	0.543218	0.046325	0.0268431	0.0822062	0.00341994	-0.0669805	0.185081	-0.113883	0.254362	0.0331663	0.00444781	-0.0111273	0.210335	0.0107329	-0.0872099	0.177154	-0.032816	0.00040699	0.192283	0.48272
Kluyveromyces marxianus	-0.0144268	0.295564	0.943385	0.934464	0.94992	0.966654	1	0.943337	0.942023	0.946786	0.934744	0.941533	0.946593	0.938571	0.940461	0.191936	0.0941331	-0.00697617	0.724242	0.925066	0.337777	0.881796	0.504748	0.575972	0.921161	0.147259	0.158138	0.0292779	0.126007	0.549598	0.197531	0.220745	0.223124	0.0777357	0.0142746	0.361326	-0.0380708	0.263031	0.11475	0.0403425	-0.0363857	0.251155	0.0787206	-0.11575	0.280014	-0.0272175	0.191054	0.246782	0.572396
Kluyveromyces lactis	-0.215193	0.0881039	0.999115	0.994074	0.839633	0.987248	0.943337	1	0.984755	0.996405	0.992329	0.999873	0.998929	0.996244	0.998236	0.0685768	-0.0120045	0.052639	0.737649	0.976072	0.0686033	0.921746	0.365144	0.52688	0.948946	-0.0566109	-0.0962068	-0.104581	-0.0515952	0.478483	-0.0286847	-0.0512825	0.0302289	-0.0717993	-0.119179	0.0886554	-0.154597	0.17696	-0.0290643	-0.0670675	-0.0624716	0.131029	-0.0229116	-0.0730597	0.161138	-0.0693455	-0.0862931	0.119396	0.41347
Eremothecium cymbalariae	-0.161598	0.084698	0.982801	0.990897	0.854437	0.979768	0.942023	0.984755	1	0.980383	0.980531	0.984386	0.981123	0.989372	0.979596	-0.0102806	0.0124889	0.0323833	0.815896	0.977886	0.105245	0.95601	0.449328	0.63271	0.973397	-0.0670832	-0.0211829	0.00473681	0.0219562	0.552295	-0.0151867	-0.0103626	0.0362372	0.0344172	-0.0103567	0.130099	-0.0579246	0.306945	0.0797057	0.0477703	-0.0650365	0.255542	0.0608053	-0.0555574	0.212974	-0.106198	-0.0162159	0.177336	0.450953
Tetrapisispora blattae	-0.195134	0.0909916	0.99754	0.986879	0.841343	0.988774	0.946786	0.996405	0.980383	1	0.99354	0.997082	0.997382	0.987759	0.99828	0.124941	-0.00744383	0.0444126	0.747715	0.970525	0.0663905	0.921564	0.368499	0.549258	0.951692	-0.0566225	-0.0775318	-0.0875864	-0.037666	0.483999	-0.0379365	-0.041791	0.0160438	-0.064466	-0.102339	0.0811324	-0.13781	0.200233	-0.00799126	-0.0494079	-0.0563504	0.152673	-0.000760343	-0.0711168	0.169063	-0.0759011	-0.0680482	0.109558	0.416
Tetrapisispora phaffii	-0.216638	0.0684082	0.993484	0.984644	0.82371	0.983106	0.934744	0.992329	0.980531	0.99354	1	0.992881	0.992365	0.985431	0.993429	0.0929337	-0.0282932	0.0461581	0.76125	0.972629	0.0437871	0.925803	0.374358	0.536514	0.950294	-0.08255	-0.0947451	-0.0835223	-0.0415432	0.488764	-0.0623142	-0.0669296	-0.000877701	-0.0396217	-0.102394	0.062832	-0.131119	0.203509	0.00560155	-0.0512345	-0.0209798	0.147922	0.0248667	-0.070354	0.200479	-0.0929602	-0.091776	0.102422	0.415553
[Candida] glabrata	-0.217465	0.0836021	0.999238	0.993531	0.837183	0.987064	0.941533	0.999873	0.984386	0.997082	0.992881	1	0.999123	0.995384	0.998846	0.0750292	-0.0130015	0.0515767	0.739456	0.974703	0.0621773	0.922704	0.360997	0.529403	0.948276	-0.0618547	-0.0983995	-0.105365	-0.0559588	0.475525	-0.0344519	-0.055879	0.0234242	-0.0757148	-0.120064	0.0810105	-0.156595	0.1787	-0.0298929	-0.066054	-0.0632885	0.131813	-0.0240326	-0.0724682	0.156767	-0.0733699	-0.0902342	0.114699	0.405769
Zygosaccharomyces rouxii	-0.211846	0.0906956	0.998864	0.990421	0.844103	0.988916	0.946593	0.998929	0.981123	0.997382	0.992365	0.999123	1	0.992566	0.999042	0.102973	-0.00671911	0.0543341	0.735093	0.971788	0.0757176	0.919193	0.363805	0.527074	0.943896	-0.0477902	-0.0883515	-0.108951	-0.0535751	0.480423	-0.0238234	-0.0432408	0.0321288	-0.0728725	-0.119633	0.0929718	-0.156481	0.175731	-0.02958	-0.0672987	-0.0606378	0.131005	-0.0306342	-0.0741949	0.15483	-0.0639126	-0.0777931	0.116503	0.413532
Zygotorulaspora mrakii	-0.217566	0.0784867	0.99349	0.998331	0.838497	0.980922	0.938571	0.996244	0.989372	0.987759	0.985431	0.995384	0.992566	1	0.989967	-0.010018	-0.0106448	0.0508441	0.744532	0.982208	0.0836244	0.927472	0.374775	0.532863	0.95468	-0.0636725	-0.0810747	-0.0980629	-0.0465327	0.494509	-0.0158398	-0.0388945	0.0425071	-0.0595859	-0.108151	0.102602	-0.143379	0.189526	-0.0137784	-0.0557884	-0.070484	0.141566	-0.0117605	-0.0648472	0.174215	-0.0777783	-0.0881851	0.133954	0.427932
Kazachstania africa1	-0.215332	0.0846011	0.998494	0.988379	0.834394	0.987906	0.940461	0.998236	0.979596	0.99828	0.993429	0.998846	0.999042	0.989967	1	0.115334	-0.00891885	0.0542213	0.742834	0.968087	0.0507542	0.92166	0.360646	0.533676	0.943275	-0.0593444	-0.100473	-0.103759	-0.0592131	0.471621	-0.0430574	-0.0610855	0.0149305	-0.0755256	-0.117226	0.0745285	-0.156105	0.183121	-0.0279679	-0.0615838	-0.0572187	0.136959	-0.0263472	-0.0771212	0.14919	-0.0671485	-0.0868701	0.111806	0.394642
Candida tropicalis	0.209427	0.340588	0.0900372	-0.0197979	0.23908	0.133692	0.191936	0.0685768	-0.0102806	0.124941	0.0929337	0.0750292	0.102973	-0.010018	0.115334	1	0.149812	-0.0396815	-0.0360764	-0.0417933	0.192637	-0.0181247	0.00361142	0.00271959	-0.0221404	0.343717	0.0845385	-0.0123791	0.0124767	-0.0745364	0.15958	0.163012	0.101687	-0.00649024	-0.0708195	0.164099	-0.119003	-0.0528298	-0.0890442	-0.0430085	0.0333835	-0.0202563	-0.118317	-0.174968	-0.116471	0.132909	0.256913	-0.0848239	0.00227522
Candida dubliniensis	0.139597	0.225669	-0.0122706	-0.0191247	0.200597	0.0187052	0.0941331	-0.0120045	0.0124889	-0.00744383	-0.0282932	-0.0130015	-0.00671911	-0.0106448	-0.00891885	0.149812	1	0.00457384	0.112124	-0.0102358	0.315894	0.0503412	0.163514	0.205413	0.0311888	0.257781	0.258947	0.203463	0.103556	0.0791659	0.263607	0.297789	0.235276	0.167018	0.167048	0.338529	0.136638	0.170705	0.160118	0.21324	-0.130447	0.244229	-0.00905782	-0.109428	0.0872746	-0.00978106	0.313865	0.0784131	0.0853041
Candida albicans	-0.289006	-0.141629	0.0479966	0.0518603	-0.0500207	0.0315582	-0.00697617	0.052639	0.0323833	0.0444126	0.0461581	0.0515767	0.0543341	0.0508441	0.0542213	-0.0396815	0.00457384	1	0.0655766	0.0430954	-0.141872	0.0392221	-0.0766329	-0.0250591	0.0274648	-0.10649	-0.145038	-0.131328	-0.105038	-0.0478032	-0.130587	-0.159863	-0.0629519	-0.133444	-0.139709	-0.141968	-0.14457	-0.108736	-0.1529	-0.124504	-0.0801681	-0.0774595	-0.0982364	-0.027743	-0.0521598	0.0944065	-0.155975	-0.105115	-0.038573
Candida orthopsilosis	-0.0305796	0.0312437	0.733767	0.761972	0.678599	0.773806	0.724242	0.737649	0.815896	0.747715	0.76125	0.739456	0.735093	0.744532	0.742834	-0.0360764	0.112124	0.0655766	1	0.749738	0.0269874	0.914648	0.662922	0.892172	0.826374	-0.0916204	0.164242	0.347384	0.191197	0.674469	-0.0564522	0.0606535	0.00301043	0.375395	0.357103	0.15388	0.289993	0.721924	0.431936	0.436124	0.0312867	0.65775	0.313594	-0.0818736	0.26367	-0.114498	0.163608	0.349169	0.373214
Scheffersomyces stipitis	-0.194077	0.049954	0.975793	0.981185	0.817653	0.961889	0.925066	0.976072	0.977886	0.970525	0.972629	0.974703	0.971788	0.982208	0.968087	-0.0417933	-0.0102358	0.0430954	0.749738	1	0.0733613	0.909578	0.42789	0.554085	0.969889	-0.0981234	-0.0466583	-0.0433298	0.0147071	0.527154	-0.0305986	-0.038133	0.0363331	0.00751793	-0.0300534	0.107993	-0.0687911	0.238348	0.0788339	-0.0035872	-0.056495	0.186666	0.04789	-0.0255057	0.279313	-0.100356	-0.0408761	0.170225	0.489219
Pichia kudriavzevii	0.476476	0.646545	0.0725522	0.0710583	0.520394	0.143894	0.337777	0.0686033	0.105245	0.0663905	0.0437871	0.0621773	0.0757176	0.0836244	0.0507542	0.192637	0.315894	-0.141872	0.0269874	0.0733613	1	0.0690137	0.205994	0.104018	0.101563	0.651776	0.520604	0.151273	0.197067	0.245872	0.768878	0.772789	0.654656	0.251454	0.0454702	0.774147	0.021829	0.0494226	0.113905	0.0947568	-0.0907011	0.128981	0.0385285	-0.129398	0.1068	0.068246	0.519499	0.16954	0.404593
Brettanomyces bruxellensis	-0.178401	0.0595379	0.917437	0.938705	0.808074	0.932594	0.881796	0.921746	0.95601	0.921564	0.925803	0.922704	0.919193	0.927472	0.92166	-0.0181247	0.0503412	0.0392221	0.914648	0.909578	0.0690137	1	0.536243	0.737776	0.935635	-0.0777925	0.0078471	0.0876829	0.0330453	0.608563	-0.00748633	0.0138732	0.0821049	0.132852	0.0696166	0.144363	0.0396263	0.464972	0.157625	0.177204	-0.0330437	0.398218	0.15309	-0.118362	0.169967	-0.126476	0.016734	0.269716	0.405791
Yarrowia lipolytica	0.249068	0.167257	0.355849	0.386682	0.522483	0.431964	0.504748	0.365144	0.449328	0.368499	0.374358	0.360997	0.363805	0.374775	0.360646	0.00361142	0.163514	-0.0766329	0.662922	0.42789	0.205994	0.536243	1	0.707737	0.497094	0.0596075	0.41983	0.601405	0.644125	0.582689	0.136407	0.275164	0.247929	0.713745	0.704037	0.53125	0.604442	0.754907	0.687072	0.653024	0.0972443	0.787874	0.500567	-0.116212	0.609287	-0.0567778	0.673293	0.772469	0.604383
Sugiyamaella lignohabitans	0.117206	0.0856728	0.523731	0.556117	0.58439	0.577954	0.575972	0.52688	0.63271	0.549258	0.536514	0.529403	0.527074	0.532863	0.533676	0.00271959	0.205413	-0.0250591	0.892172	0.554085	0.104018	0.737776	0.707737	1	0.682679	-0.0411391	0.388214	0.563507	0.45746	0.645582	-0.00849096	0.211684	-0.00155048	0.444517	0.603551	0.225046	0.514438	0.851804	0.608566	0.598504	0.0499074	0.837179	0.398896	-0.0195627	0.318789	-0.127056	0.419906	0.446563	0.374084
Saccharomycodes ludwigii	-0.118018	0.0635697	0.949523	0.960378	0.828885	0.94252	0.921161	0.948946	0.973397	0.951692	0.950294	0.948276	0.943896	0.95468	0.943275	-0.0221404	0.0311888	0.0274648	0.826374	0.969889	0.101563	0.935635	0.497094	0.682679	1	-0.090687	0.0412772	0.0941109	0.118712	0.586864	-0.0496819	0.0351937	0.0371447	0.0949253	0.0832307	0.111092	0.069528	0.37587	0.183442	0.0991759	-0.0474032	0.322427	0.185898	-0.049864	0.300732	-0.112664	0.0577692	0.189874	0.505512
Botrytis cinerea	0.456913	0.773397	-0.0557691	-0.0789844	0.312614	0.0205522	0.147259	-0.0566109	-0.0670832	-0.0566225	-0.08255	-0.0618547	-0.0477902	-0.0636725	-0.0593444	0.343717	0.257781	-0.10649	-0.0916204	-0.0981234	0.651776	-0.0777925	0.0596075	-0.0411391	-0.090687	1	0.322868	-0.00926075	0.0513134	0.0810323	0.695824	0.638	0.637466	0.0955913	-0.00622514	0.676552	-0.0409595	-0.0680214	0.0288586	-0.0263526	0.135607	0.00446569	-0.105715	-0.260763	-0.0859278	0.669145	0.377898	0.14548	0.176265
Fusarium poae	0.440243	0.346381	-0.0998877	-0.0716702	0.251004	-0.0244809	0.158138	-0.0962068	-0.0211829	-0.0775318	-0.0947451	-0.0983995	-0.0883515	-0.0810747	-0.100473	0.0845385	0.258947	-0.145038	0.164242	-0.0466583	0.520604	0.0078471	0.41983	0.388214	0.0412772	0.322868	1	0.535749	0.559865	0.295928	0.453482	0.725731	0.262255	0.339426	0.674318	0.618284	0.575314	0.441812	0.720502	0.481994	0.0306752	0.556642	0.386033	0.0777001	0.485981	0.0278167	0.76078	0.373241	0.353962
Fusarium graminearum	0.32528	0.122219	-0.11195	-0.084421	0.0813279	-0.0588199	0.0292779	-0.104581	0.00473681	-0.0875864	-0.0835223	-0.105365	-0.108951	-0.0980629	-0.103759	-0.0123791	0.203463	-0.131328	0.347384	-0.0433298	0.151273	0.0876829	0.601405	0.563507	0.0941109	-0.00926075	0.535749	1	0.69268	0.268661	0.0668036	0.276783	0.062515	0.622164	0.798037	0.255422	0.779489	0.664175	0.747563	0.783807	0.141238	0.795558	0.527133	0.369286	0.471054	-0.1695	0.672491	0.393584	0.262461
Fusarium vene1tum	0.323133	0.297503	-0.0596209	-0.0409696	0.175131	-0.00900405	0.126007	-0.0515952	0.0219562	-0.037666	-0.0415432	-0.0559588	-0.0535751	-0.0465327	-0.0592131	0.0124767	0.103556	-0.105038	0.191197	0.0147071	0.197067	0.0330453	0.644125	0.45746	0.118712	0.0513134	0.559865	0.69268	1	0.258263	0.101242	0.397658	0.0935992	0.506038	0.726171	0.329235	0.714459	0.4998	0.644394	0.414941	0.260668	0.608319	0.47649	0.0352231	0.598483	-0.0993071	0.784641	0.50165	0.477849
Fusarium pseudograminearum	0.0164005	0.0873106	0.473067	0.507923	0.536939	0.543218	0.549598	0.478483	0.552295	0.483999	0.488764	0.475525	0.480423	0.494509	0.471621	-0.0745364	0.0791659	-0.0478032	0.674469	0.527154	0.245872	0.608563	0.582689	0.645582	0.586864	0.0810323	0.295928	0.268661	0.258263	1	0.269538	0.36719	0.26403	0.355178	0.329366	0.336171	0.440763	0.522311	0.3691	0.34025	0.043489	0.487311	0.335893	0.153684	0.207307	-0.0264915	0.295733	0.455119	0.657771
Fusarium oxysporum	0.252271	0.711786	-0.0350689	-0.0303685	0.357193	0.046325	0.197531	-0.0286847	-0.0151867	-0.0379365	-0.0623142	-0.0344519	-0.0238234	-0.0158398	-0.0430574	0.15958	0.263607	-0.130587	-0.0564522	-0.0305986	0.768878	-0.00748633	0.136407	-0.00849096	-0.0496819	0.695824	0.453482	0.0668036	0.101242	0.269538	1	0.751242	0.794536	0.13981	-0.00441006	0.775981	0.0336211	-0.0148193	0.0129873	0.0495462	-0.0190212	0.0443144	-0.0807598	-0.0539562	-0.0558073	0.108278	0.476293	0.263364	0.360062
Fusarium verticillioides	0.432948	0.718702	-0.0552523	-0.0362325	0.364689	0.0268431	0.220745	-0.0512825	-0.0103626	-0.041791	-0.0669296	-0.055879	-0.0432408	-0.0388945	-0.0610855	0.163012	0.297789	-0.159863	0.0606535	-0.038133	0.772789	0.0138732	0.275164	0.211684	0.0351937	0.638	0.725731	0.276783	0.397658	0.36719	0.751242	1	0.677648	0.180467	0.279895	0.712766	0.301405	0.152248	0.327175	0.178212	0.106928	0.262853	0.220322	-0.0904071	0.184127	0.162666	0.646247	0.334225	0.402419
Fusarium fujikuroi	0.139622	0.627346	0.0219037	0.0396822	0.340037	0.0822062	0.223124	0.0302289	0.0362372	0.0160438	-0.000877701	0.0234242	0.0321288	0.0425071	0.0149305	0.101687	0.235276	-0.0629519	0.00301043	0.0363331	0.654656	0.0821049	0.247929	-0.00155048	0.0371447	0.637466	0.262255	0.062515	0.0935992	0.26403	0.794536	0.677648	1	0.152507	-0.0264538	0.693705	0.0131264	0.0130372	-0.035422	-0.0410589	-0.0585778	-0.0159824	0.099929	-0.243143	0.04928	0.160103	0.402443	0.365923	0.318632
Fusarium musae	0.491131	0.102746	-0.0715852	-0.0534383	0.174454	0.00341994	0.0777357	-0.0717993	0.0344172	-0.064466	-0.0396217	-0.0757148	-0.0728725	-0.0595859	-0.0755256	-0.00649024	0.167018	-0.133444	0.375395	0.00751793	0.251454	0.132852	0.713745	0.444517	0.0949253	0.0955913	0.339426	0.622164	0.506038	0.355178	0.13981	0.180467	0.152507	1	0.641659	0.441072	0.541461	0.694239	0.6449	0.705565	0.0409806	0.702218	0.439057	-0.026649	0.45254	-0.0695613	0.608786	0.486965	0.352855
Purpureocillium takamizusanense	0.419747	0.0181925	-0.124616	-0.0892724	0.044757	-0.0669805	0.0142746	-0.119179	-0.0103567	-0.102339	-0.102394	-0.120064	-0.119633	-0.108151	-0.117226	-0.0708195	0.167048	-0.139709	0.357103	-0.0300534	0.0454702	0.0696166	0.704037	0.603551	0.0832307	-0.00622514	0.674318	0.798037	0.726171	0.329366	-0.00441006	0.279895	-0.0264538	0.641659	1	0.347008	0.830712	0.761561	0.939836	0.790361	0.122202	0.847581	0.527851	0.128755	0.604721	0.00389501	0.732008	0.587058	0.250291
Drechmeria coniospora	0.446776	0.636741	0.0836802	0.0943053	0.505565	0.185081	0.361326	0.0886554	0.130099	0.0811324	0.062832	0.0810105	0.0929718	0.102602	0.0745285	0.164099	0.338529	-0.141968	0.15388	0.107993	0.774147	0.144363	0.53125	0.225046	0.111092	0.676552	0.618284	0.255422	0.329235	0.336171	0.775981	0.712766	0.693705	0.441072	0.347008	1	0.1945	0.27647	0.379296	0.356448	0.0379354	0.379561	0.110952	-0.183358	0.316848	0.209989	0.70996	0.561763	0.479739
Ustilaginoidea virens	0.269355	-0.0278381	-0.162366	-0.123362	-0.0390005	-0.113883	-0.0380708	-0.154597	-0.0579246	-0.13781	-0.131119	-0.156595	-0.156481	-0.143379	-0.156105	-0.119003	0.136638	-0.14457	0.289993	-0.0687911	0.021829	0.0396263	0.604442	0.514438	0.069528	-0.0409595	0.575314	0.779489	0.714459	0.440763	0.0336211	0.301405	0.0131264	0.541461	0.830712	0.1945	1	0.61895	0.779135	0.63189	0.213955	0.716522	0.621094	0.21712	0.474202	-0.00748257	0.633291	0.45799	0.395835
Pochonia chlamydosporia	0.226905	-0.0308672	0.172683	0.214026	0.296841	0.254362	0.263031	0.17696	0.306945	0.200233	0.203509	0.1787	0.175731	0.189526	0.183121	-0.0528298	0.170705	-0.108736	0.721924	0.238348	0.0494226	0.464972	0.754907	0.851804	0.37587	-0.0680214	0.441812	0.664175	0.4998	0.522311	-0.0148193	0.152248	0.0130372	0.694239	0.761561	0.27647	0.61895	1	0.75617	0.762958	0.0913816	0.910248	0.522475	-0.0703855	0.382111	-0.127558	0.521036	0.52226	0.325785
Colletotrichum higginsianum	0.448969	0.0353942	-0.0304571	0.0050308	0.12503	0.0331663	0.11475	-0.0290643	0.0797057	-0.00799126	0.00560155	-0.0298929	-0.02958	-0.0137784	-0.0279679	-0.0890442	0.160118	-0.1529	0.431936	0.0788339	0.113905	0.157625	0.687072	0.608566	0.183442	0.0288586	0.720502	0.747563	0.644394	0.3691	0.0129873	0.327175	-0.035422	0.6449	0.939836	0.379296	0.779135	0.75617	1	0.786684	0.169382	0.84779	0.569289	0.156178	0.673897	0.0311992	0.679206	0.528958	0.320119
Thermothelomyces thermophilus	0.386773	-0.0447391	-0.0711396	-0.0346369	0.0856482	0.00444781	0.0403425	-0.0670675	0.0477703	-0.0494079	-0.0512345	-0.066054	-0.0672987	-0.0557884	-0.0615838	-0.0430085	0.21324	-0.124504	0.436124	-0.0035872	0.0947568	0.177204	0.653024	0.598504	0.0991759	-0.0263526	0.481994	0.783807	0.414941	0.34025	0.0495462	0.178212	-0.0410589	0.705565	0.790361	0.356448	0.63189	0.762958	0.786684	1	0.117239	0.891829	0.43286	0.305282	0.368331	-0.0871734	0.569116	0.522692	0.19914
Thermothielavioides terrestris	-0.0887726	0.154347	-0.0672286	-0.071018	-0.0864555	-0.0111273	-0.0363857	-0.0624716	-0.0650365	-0.0563504	-0.0209798	-0.0632885	-0.0606378	-0.070484	-0.0572187	0.0333835	-0.130447	-0.0801681	0.0312867	-0.056495	-0.0907011	-0.0330437	0.0972443	0.0499074	-0.0474032	0.135607	0.0306752	0.141238	0.260668	0.043489	-0.0190212	0.106928	-0.0585778	0.0409806	0.122202	0.0379354	0.213955	0.0913816	0.169382	0.117239	1	0.150779	0.0740009	0.00739082	0.0607738	0.266087	0.0860328	0.0838334	0.152059
Neurospora crassa	0.334713	0.0656911	0.125686	0.164229	0.294558	0.210335	0.251155	0.131029	0.255542	0.152673	0.147922	0.131813	0.131005	0.141566	0.136959	-0.0202563	0.244229	-0.0774595	0.65775	0.186666	0.128981	0.398218	0.787874	0.837179	0.322427	0.00446569	0.556642	0.795558	0.608319	0.487311	0.0443144	0.262853	-0.0159824	0.702218	0.847581	0.379561	0.716522	0.910248	0.84779	0.891829	0.150779	1	0.490591	0.113718	0.429048	-0.0663583	0.660772	0.59262	0.348362
Pyricularia grisea	0.163241	-0.118266	-0.0248535	0.0245687	0.046646	0.0107329	0.0787206	-0.0229116	0.0608053	-0.000760343	0.0248667	-0.0240326	-0.0306342	-0.0117605	-0.0263472	-0.118317	-0.00905782	-0.0982364	0.313594	0.04789	0.0385285	0.15309	0.500567	0.398896	0.185898	-0.105715	0.386033	0.527133	0.47649	0.335893	-0.0807598	0.220322	0.099929	0.439057	0.527851	0.110952	0.621094	0.522475	0.569289	0.43286	0.0740009	0.490591	1	-0.0338415	0.646408	-0.114806	0.35346	0.41311	0.385859
Pyricularia oryzae	-0.115081	-0.253806	-0.0784599	-0.066105	-0.187566	-0.0872099	-0.11575	-0.0730597	-0.0555574	-0.0711168	-0.070354	-0.0724682	-0.0741949	-0.0648472	-0.0771212	-0.174968	-0.109428	-0.027743	-0.0818736	-0.0255057	-0.129398	-0.118362	-0.116212	-0.0195627	-0.049864	-0.260763	0.0777001	0.369286	0.0352231	0.153684	-0.0539562	-0.0904071	-0.243143	-0.026649	0.128755	-0.183358	0.21712	-0.0703855	0.156178	0.305282	0.00739082	0.113718	-0.0338415	1	0.0401963	-0.180224	0.0063253	-0.0778164	0.110824
Pyricularia pennisetige1	0.162664	-0.00410305	0.159844	0.183784	0.238793	0.177154	0.280014	0.161138	0.212974	0.169063	0.200479	0.156767	0.15483	0.174215	0.14919	-0.116471	0.0872746	-0.0521598	0.26367	0.279313	0.1068	0.169967	0.609287	0.318789	0.300732	-0.0859278	0.485981	0.471054	0.598483	0.207307	-0.0558073	0.184127	0.04928	0.45254	0.604721	0.316848	0.474202	0.382111	0.673897	0.368331	0.0607738	0.429048	0.646408	0.0401963	1	-0.118747	0.490955	0.501997	0.480203
Aspergillus oryzae	0.282865	0.27272	-0.0699199	-0.0850916	-0.0204418	-0.032816	-0.0272175	-0.0693455	-0.106198	-0.0759011	-0.0929602	-0.0733699	-0.0639126	-0.0777783	-0.0671485	0.132909	-0.00978106	0.0944065	-0.114498	-0.100356	0.068246	-0.126476	-0.0567778	-0.127056	-0.112664	0.669145	0.0278167	-0.1695	-0.0993071	-0.0264915	0.108278	0.162666	0.160103	-0.0695613	0.00389501	0.209989	-0.00748257	-0.127558	0.0311992	-0.0871734	0.266087	-0.0663583	-0.114806	-0.180224	-0.118747	1	0.0426806	0.0946973	0.0318462
Aspergillus luchuensis	0.512323	0.486424	-0.0891046	-0.0865322	0.3151	0.00040699	0.191054	-0.0862931	-0.0162159	-0.0680482	-0.091776	-0.0902342	-0.0777931	-0.0881851	-0.0868701	0.256913	0.313865	-0.155975	0.163608	-0.0408761	0.519499	0.016734	0.673293	0.419906	0.0577692	0.377898	0.76078	0.672491	0.784641	0.295733	0.476293	0.646247	0.402443	0.608786	0.732008	0.70996	0.633291	0.521036	0.679206	0.569116	0.0860328	0.660772	0.35346	0.0063253	0.490955	0.0426806	1	0.600516	0.502704
Aspergillus puulaauensis	0.0985236	0.188146	0.105327	0.150226	0.279251	0.192283	0.246782	0.119396	0.177336	0.109558	0.102422	0.114699	0.116503	0.133954	0.111806	-0.0848239	0.0784131	-0.105115	0.349169	0.170225	0.16954	0.269716	0.772469	0.446563	0.189874	0.14548	0.373241	0.393584	0.50165	0.455119	0.263364	0.334225	0.365923	0.486965	0.587058	0.561763	0.45799	0.52226	0.528958	0.522692	0.0838334	0.59262	0.41311	-0.0778164	0.501997	0.0946973	0.600516	1	0.462952
Aspergillus chevalieri	0.0358904	0.188978	0.406136	0.424786	0.567165	0.48272	0.572396	0.41347	0.450953	0.416	0.415553	0.405769	0.413532	0.427932	0.394642	0.00227522	0.0853041	-0.038573	0.373214	0.489219	0.404593	0.405791	0.604383	0.374084	0.505512	0.176265	0.353962	0.262461	0.477849	0.657771	0.360062	0.402419	0.318632	0.352855	0.250291	0.479739	0.395835	0.325785	0.320119	0.19914	0.152059	0.348362	0.385859	0.110824	0.480203	0.0318462	0.502704	0.462952	1
Talaromyces rugulosus	0.40981	0.36102	0.24132	0.269087	0.423413	0.30024	0.42707	0.249286	0.309057	0.252011	0.234728	0.243245	0.246014	0.265942	0.235188	-0.0403039	0.168639	-0.130395	0.35365	0.313627	0.417926	0.283083	0.602221	0.487764	0.388986	0.310005	0.550766	0.639282	0.647283	0.432116	0.277895	0.494455	0.239794	0.418086	0.57117	0.487894	0.627341	0.410293	0.626895	0.494935	0.283751	0.594152	0.391462	0.255503	0.478003	0.232808	0.657822	0.42915	0.620602
Zymoseptoria tritici	0.244678	-0.00752096	-0.0445955	-0.0177111	0.0988348	0.0312291	0.10645	-0.041126	-0.00546711	-0.0259211	-0.0429257	-0.0437634	-0.0461996	-0.0181438	-0.0508707	-0.0968359	0.100862	-0.079348	0.0575177	0.0160919	0.241323	-0.0230507	0.175535	0.128181	0.0626216	0.163329	0.532145	0.104742	0.139529	0.191142	0.196355	0.32857	0.0227697	0.19844	0.291814	0.351053	0.208807	0.294408	0.443199	0.283533	0.148718	0.277897	0.288266	0.0509423	0.341871	0.179066	0.310008	0.187256	0.39846
Schizosaccharomyces pombe	0.465405	0.385233	-0.0341404	-0.0186326	0.285203	0.0820704	0.21465	-0.0315912	0.0261657	-0.0200776	-0.030004	-0.0376087	-0.03217	-0.018104	-0.0416225	0.0761882	0.207298	-0.106487	0.157104	0.0151143	0.542496	0.0325394	0.454202	0.270286	0.0799558	0.557746	0.615138	0.377437	0.438644	0.274007	0.414319	0.576723	0.34133	0.42286	0.452953	0.67277	0.381766	0.388864	0.56834	0.39298	0.281672	0.477918	0.434475	-0.0688184	0.458274	0.423852	0.626732	0.453998	0.580329
Psilocybe cubensis	0.345402	0.119959	-0.120086	-0.0849536	0.145723	-0.0350471	0.0835794	-0.113756	-0.0254187	-0.0970218	-0.11739	-0.117016	-0.10991	-0.097672	-0.119089	-0.042634	0.206001	-0.135945	0.246902	-0.0254256	0.311594	0.0283273	0.665574	0.513264	0.0625913	0.0826084	0.740954	0.68888	0.744209	0.465808	0.22652	0.50355	0.140117	0.523216	0.824874	0.477642	0.758916	0.594376	0.799911	0.649781	0.113199	0.731412	0.475172	0.201593	0.559601	-0.0679099	0.755214	0.634849	0.462844
Cryptococcus neoformans	0.105807	-0.0534757	0.140067	0.167651	0.186149	0.19383	0.186856	0.149987	0.232305	0.142364	0.152517	0.14807	0.143984	0.160589	0.147079	-0.109288	0.202794	-0.0579307	0.430818	0.18621	0.014557	0.285711	0.628882	0.493396	0.234745	-0.122011	0.182892	0.671676	0.382324	0.306865	-0.0146848	-0.00183701	-0.0944524	0.574967	0.572631	0.261418	0.475666	0.544352	0.524137	0.793412	0.198512	0.714031	0.282662	0.365225	0.328059	-0.121326	0.425221	0.550393	0.300554
Puccinia striiformis	0.395057	0.186248	0.0694759	0.101298	0.299538	0.143921	0.266109	0.0713642	0.137438	0.0799764	0.0715767	0.065162	0.0685344	0.0877559	0.0585961	-0.0466246	0.196031	-0.0318156	0.281259	0.174753	0.365709	0.160077	0.7383	0.400643	0.231824	0.16419	0.525933	0.450866	0.575516	0.483336	0.292055	0.473269	0.292131	0.574388	0.620406	0.586073	0.57258	0.465516	0.644184	0.571311	0.129806	0.583235	0.611849	-0.0424371	0.667302	0.0387164	0.656967	0.714603	0.622358
Sporisorium graminicola	0.350565	-0.0262921	-0.0541743	-0.0266405	0.055415	-0.0175655	0.0258386	-0.0517644	0.053997	-0.0393764	-0.0436131	-0.0513007	-0.0557714	-0.0420498	-0.0495168	-0.058968	0.148216	-0.10722	0.360675	0.00409636	0.073684	0.146857	0.528922	0.539702	0.134979	-0.103319	0.370692	0.852531	0.472569	0.285735	-0.00278667	0.116391	-0.0937468	0.622962	0.69332	0.184924	0.665742	0.625376	0.659589	0.865705	0.0764674	0.797369	0.354483	0.459113	0.243315	-0.143252	0.546778	0.344746	0.172379
Ustilago maydis	0.297319	-0.0463034	0.0340942	0.0508985	0.103576	0.0332844	0.113759	0.0303475	0.107646	0.041192	0.0453157	0.0277029	0.0255604	0.0420908	0.0221441	-0.117803	0.110966	-0.14042	0.251857	0.167003	0.0727042	0.114048	0.614004	0.418462	0.256732	-0.12547	0.319515	0.659058	0.609607	0.337485	-0.0683851	0.155988	0.084581	0.535417	0.703833	0.187902	0.708485	0.491734	0.668477	0.536648	0.0231428	0.554617	0.447244	0.187613	0.584862	-0.141385	0.552317	0.414134	0.344269
Toxoplasma gondii	0.720595	0.636566	-0.170608	-0.185838	0.313722	-0.106335	0.0898446	-0.177189	-0.132932	-0.163011	-0.198641	-0.181404	-0.170478	-0.172986	-0.18472	0.288627	0.25863	-0.226146	-0.0765801	-0.165811	0.778006	-0.149431	0.221453	0.113169	-0.103814	0.608268	0.586356	0.285682	0.371168	0.0372029	0.587633	0.650443	0.416402	0.42913	0.277204	0.640226	0.130856	0.189871	0.278027	0.250237	-0.108021	0.250314	0.0323647	-0.183326	0.120763	0.0956444	0.631307	0.132562	0.166751
Besnoitia besnoiti	0.547414	0.0943521	-0.163867	-0.146584	0.0385649	-0.129564	-0.00111676	-0.17228	-0.0645088	-0.147922	-0.139519	-0.174887	-0.176707	-0.156831	-0.182176	-0.0873956	0.140006	-0.208662	0.143814	-0.0377906	0.25371	-0.0488241	0.541995	0.365291	0.0714025	0.00101783	0.531766	0.663661	0.685938	0.297703	0.110654	0.313847	0.054155	0.65883	0.698949	0.334405	0.678578	0.519765	0.725958	0.613227	0.0497661	0.607499	0.55084	0.179587	0.609852	-0.175917	0.656808	0.322748	0.381582
Neospora caninum	0.411658	0.123504	-0.161709	-0.142331	0.0834078	-0.103706	0.0055717	-0.164682	-0.0541274	-0.144795	-0.158408	-0.167178	-0.168323	-0.150798	-0.171236	-0.0409757	0.247004	-0.146796	0.220374	-0.0595726	0.242786	0.0117141	0.618609	0.494643	0.0756708	0.0788885	0.522337	0.695827	0.71011	0.232818	0.137117	0.301715	0.119827	0.677063	0.757644	0.407844	0.687711	0.68114	0.716104	0.640899	0.0680074	0.738118	0.423824	-0.00711278	0.476941	-0.0647285	0.768635	0.471041	0.366849
Babesia bigemi1	0.0154023	0.00557375	-0.0446569	-0.0458581	0.0152259	-0.0787811	-0.116441	-0.0403621	-0.049668	-0.0536226	-0.0573322	-0.0386261	-0.0437057	-0.0380189	-0.0422403	-0.0189433	0.0295824	-0.0162569	-0.0947931	-0.0729902	-0.170789	-0.0712539	-0.1939	-0.111797	-0.0832518	0.0839194	-0.205775	-0.0605495	-0.159534	-0.211902	-0.159927	-0.173148	-0.229354	-0.18735	-0.181208	-0.241086	-0.190199	-0.195655	-0.216355	-0.069312	-0.105674	-0.132169	-0.21238	0.0847712	-0.256129	0.104526	-0.200481	-0.239314	-0.213712
Plasmodium malariae	0.371757	-0.114055	-0.109167	-0.0923787	-0.0606891	-0.102557	-0.063655	-0.125986	-0.0308918	-0.0980609	-0.0661434	-0.126132	-0.128987	-0.112274	-0.12978	-0.163249	0.0235181	-0.0933957	0.195615	0.0212065	0.0344192	-0.0025238	0.370005	0.304133	0.0802158	-0.137863	0.313324	0.349562	0.351723	0.266806	-0.0999068	0.0944923	-0.100268	0.543346	0.53522	0.141877	0.453128	0.436435	0.617844	0.477312	-0.00851549	0.443637	0.486584	0.0705188	0.571359	-0.179758	0.300437	0.22814	0.188671
Plasmodium vivax	0.540116	-0.059766	-0.106869	-0.0760967	-0.0507625	-0.0905963	-0.0365552	-0.108259	-0.0358266	-0.106966	-0.0985331	-0.109708	-0.113498	-0.0896895	-0.113186	-0.193426	-0.0559973	-0.167642	0.136442	-0.0568746	0.0418987	-0.0290132	0.344211	0.223665	-0.0120519	-0.0288363	0.350818	0.260643	0.254246	0.213066	-0.077041	0.0887128	-0.104738	0.3951	0.527765	0.206576	0.402986	0.359325	0.528169	0.379832	-0.0356011	0.35892	0.349699	-0.0731555	0.350086	0.116134	0.253661	0.274437	0.0220295
Plasmodium cynomolgi	0.451749	0.122031	-0.135816	-0.102404	0.12237	-0.0606257	0.0376265	-0.135403	-0.0128428	-0.112587	-0.116012	-0.135732	-0.134962	-0.122376	-0.13574	-0.024705	0.216309	-0.170392	0.321798	-0.0534092	0.258519	0.0960738	0.681699	0.576746	0.0674804	0.0419668	0.563304	0.779273	0.653607	0.306348	0.13427	0.323126	0.0773744	0.742857	0.782019	0.455472	0.667427	0.736925	0.778857	0.869395	0.148077	0.854239	0.480548	0.167972	0.47951	-0.171962	0.723917	0.53549	0.296986
Plasmodium knowlesi	0.273781	-0.184035	0.0416916	0.0749091	0.0687411	0.0984714	0.0855362	0.0438995	0.167597	0.0568322	0.0820983	0.0442199	0.0373466	0.0605602	0.0414607	-0.179041	-0.0982912	-0.16601	0.468236	0.115613	-0.0363728	0.256369	0.541194	0.52735	0.197581	-0.213009	0.224917	0.570487	0.360934	0.501719	-0.0574093	-0.0428563	-0.162279	0.615385	0.55104	0.0827519	0.57339	0.694992	0.554706	0.673098	0.0630373	0.648735	0.482055	0.250669	0.249187	-0.226148	0.280608	0.30302	0.324793
Plasmodium coatneyi	0.371241	-0.0126042	-0.118772	-0.0970534	0.00919127	-0.0981744	-0.0234388	-0.120044	-0.0449506	-0.107874	-0.116575	-0.121207	-0.125553	-0.108265	-0.128694	-0.0621468	0.0892693	-0.146742	0.0685691	-0.0831269	0.293624	-0.0310915	0.184111	0.17804	0.0205358	-0.0113145	0.216934	0.612165	0.182111	0.180211	0.123244	0.207727	0.0614614	0.40409	0.287649	0.141832	0.39631	0.223743	0.292274	0.591613	-0.0336557	0.38731	0.400631	0.536289	0.143651	-0.164656	0.302336	0.0717818	0.196698
Plasmodium yoelii	0.38012	-0.126872	-0.0924803	-0.078351	-0.0220225	-0.0936607	-0.0145917	-0.104723	-0.0301671	-0.0788498	-0.0848402	-0.10497	-0.110501	-0.0935796	-0.110284	-0.0741733	0.0659715	-0.0839514	0.0589787	0.00211873	0.163403	-0.0880831	0.128288	0.235229	0.108384	-0.0856265	0.425066	0.508643	0.247122	0.157598	-0.0667362	0.179212	-0.118446	0.289901	0.451787	0.0414984	0.42698	0.28389	0.512874	0.488205	-0.0138215	0.351101	0.529477	0.410974	0.429066	-0.0899712	0.296824	0.0112759	0.192137
Plasmodium sp. gorilla clade G2	0.0822977	0.0902147	-0.111943	-0.0927065	-0.0607126	-0.0748871	-0.0497614	-0.105971	-0.0605412	-0.108671	-0.0618433	-0.10799	-0.107775	-0.0977152	-0.109646	-0.11314	-0.0206665	-0.108468	0.0881282	-0.0540922	0.0188395	-0.0174649	0.323106	0.145399	-0.0303949	-0.0657708	0.18777	0.406014	0.413112	0.106561	0.00181906	0.159698	-0.0293238	0.30093	0.38651	0.182208	0.388367	0.231987	0.399116	0.437213	0.762754	0.363409	0.182966	0.170579	0.265881	-0.0879042	0.296872	0.242563	0.151054
Thalassiosira pseudo11	0.219071	-0.120876	-0.0819433	-0.0362698	0.0115428	-0.0129758	-0.00359309	-0.076844	0.0413618	-0.0513788	-0.0272673	-0.0750234	-0.0761537	-0.0670782	-0.0676555	-0.0791918	0.140367	-0.0647567	0.534506	-0.0159772	-0.0125965	0.238041	0.606339	0.626165	0.132639	-0.0866383	0.411287	0.704825	0.407083	0.565051	-0.0158582	0.219235	0.0324783	0.623666	0.701567	0.139585	0.795827	0.776142	0.716371	0.745038	0.106658	0.78331	0.645072	0.157005	0.298705	-0.10427	0.414667	0.409558	0.266106
Phaeodactylum tricornutum	0.366821	0.251823	0.0756504	0.0870272	0.30161	0.146046	0.241827	0.0805873	0.145792	0.0850213	0.0853899	0.0746877	0.075646	0.0881692	0.0692344	0.0142325	0.131731	-0.105818	0.222269	0.158079	0.281961	0.0836171	0.63439	0.362042	0.167227	0.170169	0.471159	0.489869	0.607398	0.269988	0.20265	0.293108	0.139262	0.569171	0.639061	0.549326	0.376631	0.453984	0.602436	0.523706	0.109985	0.52105	0.395518	0.0551626	0.703324	-0.00940431	0.627592	0.610074	0.490316
Trypanosoma brucei	0.645584	0.615324	-0.164901	-0.176065	0.371434	-0.0756469	0.141203	-0.168546	-0.11855	-0.154072	-0.185398	-0.173388	-0.15853	-0.166862	-0.175232	0.341984	0.360223	-0.192828	-0.0392874	-0.157633	0.839414	-0.122422	0.354033	0.156035	-0.0816631	0.628255	0.65914	0.406035	0.439754	0.154872	0.650267	0.738886	0.517231	0.482774	0.344083	0.756786	0.25402	0.24111	0.340704	0.349784	-0.045803	0.343283	0.194077	-0.113229	0.241455	0.0916425	0.760605	0.293149	0.361016
Leishmania infantum	0.295484	0.552561	0.0116831	-0.00496743	0.138493	0.064635	0.10033	0.0144393	0.000660459	0.0144093	-0.00218232	0.0103698	0.0159233	0.00455074	0.0152101	0.191807	0.0936244	-0.039147	0.00129924	-0.0162636	0.244127	-0.0133704	0.0467622	0.0280208	-0.0106136	0.831017	0.121959	0.038675	0.0521891	0.0536198	0.363149	0.320273	0.370412	0.000315833	0.0676304	0.372401	0.0667674	-0.0148946	0.0939725	-0.00861491	0.289482	0.0456897	-0.0416453	-0.128021	-0.0469278	0.83088	0.186515	0.122777	0.105006
Leishmania donovani	0.477864	-0.0242307	-0.157565	-0.132419	-0.023239	-0.123836	-0.033988	-0.157671	-0.0880558	-0.144242	-0.138667	-0.160663	-0.161149	-0.145593	-0.164851	-0.0792938	0.0905001	-0.168793	0.103353	-0.0592164	0.17756	-0.0544469	0.5161	0.214695	0.00748829	9.63824e-05	0.377004	0.614103	0.403879	0.255321	0.0851898	0.228843	0.0495166	0.586808	0.608648	0.321709	0.651238	0.373124	0.626593	0.729143	0.0962993	0.533836	0.507647	0.302927	0.476584	-0.0685461	0.481639	0.371033	0.313591
Leishmania mexica1	0.143756	0.0608621	-0.0651579	-0.0639862	0.0844298	-0.0766718	-0.0811888	-0.0620119	-0.0458637	-0.0666749	-0.0660677	-0.0608536	-0.0641935	-0.0611232	-0.0613338	0.0340126	0.111857	-0.0585146	0.0189223	-0.0687387	-0.120649	-0.0317851	0.0468169	0.0647395	-0.0414352	0.161176	-0.0399443	0.100158	0.0589361	-0.113707	-0.142927	-0.0893833	-0.150715	0.050078	0.0691169	-0.0746821	0.0221528	0.0503451	0.0320952	0.0805525	-0.0609401	0.0837458	-0.0343774	-0.0633187	-0.0479637	0.137906	0.0276727	-0.0691256	-0.0987306
Leishmania major	0.563923	0.116314	-0.149026	-0.120285	0.150148	-0.0725726	0.0500936	-0.150095	-0.0195652	-0.124458	-0.120579	-0.151875	-0.151539	-0.136148	-0.154292	-0.00505969	0.19979	-0.190722	0.315129	-0.056517	0.351376	0.0403336	0.652675	0.552279	0.0809861	0.0918143	0.642023	0.80507	0.68358	0.335454	0.142559	0.382286	0.0975677	0.790221	0.82988	0.428938	0.706457	0.754028	0.821756	0.782949	0.051187	0.78933	0.638412	0.104167	0.598566	-0.13453	0.740761	0.452711	0.387752
Leishmania braziliensis	0.446146	0.0199076	-0.16763	-0.136771	0.024115	-0.107137	-0.0185348	-0.165462	-0.0537442	-0.142025	-0.148456	-0.166006	-0.164185	-0.154929	-0.165497	-0.0632064	0.146428	-0.171256	0.275876	-0.0597	0.116365	0.018877	0.668875	0.55404	0.0414374	-0.06211	0.616978	0.819902	0.743667	0.350822	0.0558917	0.280522	-0.0381137	0.65375	0.905881	0.331598	0.828797	0.692879	0.86784	0.818326	0.0924531	0.831492	0.518234	0.295435	0.553284	-0.148749	0.723579	0.537554	0.329187
Leishmania pa1mensis	0.459384	0.158926	-0.122106	-0.0888054	0.170126	-0.0466159	0.0775989	-0.11864	0.000417469	-0.103536	-0.110228	-0.121594	-0.117873	-0.103311	-0.123884	-0.0264952	0.237002	-0.176157	0.315367	-0.0333941	0.306308	0.0793569	0.739165	0.5778	0.0914991	0.126655	0.691107	0.738672	0.758346	0.360544	0.18949	0.409979	0.167259	0.72407	0.88678	0.503802	0.796184	0.754865	0.820144	0.709924	0.063157	0.802285	0.51656	-0.036	0.53802	-0.0359356	0.833155	0.617496	0.398415
Dictyostelium discoideum	0.332177	-0.0848794	-0.0794865	-0.038333	0.0138913	-0.0270221	0.000822022	-0.0770493	0.0419924	-0.0501174	-0.0411039	-0.0741167	-0.0746649	-0.0676627	-0.0656091	-0.0783134	0.15211	-0.0814294	0.518416	-0.00480498	-0.0662137	0.217687	0.632951	0.701643	0.135515	-0.118122	0.540087	0.744053	0.543038	0.417983	-0.0903107	0.193993	-0.0866234	0.603921	0.86065	0.170201	0.789031	0.829802	0.860553	0.802145	0.104507	0.879717	0.513861	0.132427	0.367709	-0.0885751	0.527534	0.426983	0.122215
Giardia intesti1lis	0.0255975	0.0591442	0.0836402	-0.0303786	0.0199288	0.0935807	0.0660466	0.0609414	-0.0377745	0.11789	0.0981528	0.0699965	0.09315	-0.024572	0.11456	0.912851	0.00550723	0.0162108	-0.0615917	-0.0527944	-0.174473	-0.0437464	-0.136962	-0.0747026	-0.0552889	0.0647476	-0.179524	-0.126193	-0.130086	-0.178652	-0.163153	-0.167325	-0.167022	-0.148791	-0.15027	-0.177057	-0.17019	-0.131879	-0.178896	-0.129693	0.0789642	-0.131046	-0.159435	-0.110742	-0.188125	0.103996	-0.0211571	-0.201344	-0.185944
Staphylococcus aureus	-0.312652	-0.12971	-0.0384013	-0.0238743	-0.0984797	-0.0564764	-0.0844705	-0.0348877	-0.0524056	-0.039494	-0.0429688	-0.0338233	-0.0348059	-0.0344563	-0.0331489	0.0150438	-0.160686	-0.040385	-0.0931573	-0.0580454	-0.125472	-0.0408969	-0.115355	-0.107069	-0.0580788	-0.0879208	-0.0947446	-0.131245	-0.12351	-0.108352	-0.0775025	-0.091349	-0.063927	-0.163548	-0.172259	-0.1091	-0.173687	-0.0774211	-0.201459	-0.145012	-0.106049	-0.129372	-0.0274037	-0.0722512	-0.151313	-0.0876001	-0.158278	-0.113699	-0.00715805
Staphylococcus condimenti	-0.189203	-0.00272113	0.121499	0.136281	0.183351	0.134963	0.153292	0.12205	0.115479	0.107316	0.100885	0.11996	0.127687	0.13128	0.11522	0.037595	-0.0553132	-0.0284346	0.0109852	0.101608	0.258978	0.113816	0.0298677	-0.0340898	0.0750084	0.0794898	0.0326251	-0.198567	-0.124045	0.0525964	0.128054	0.115384	0.126434	-0.0817127	-0.189804	0.203519	-0.238387	-0.0602973	-0.177212	-0.131002	-0.146417	-0.0718877	-0.0975744	-0.184742	-0.129491	-0.0289999	-0.0211424	0.0458481	0.190854
Staphylococcus capitis	0.0239372	0.0588468	0.0838566	-0.030256	0.0193083	0.093349	0.0659158	0.0611381	-0.0382433	0.117982	0.0982259	0.0701725	0.0933404	-0.0243605	0.114661	0.9133	0.00349285	0.0152953	-0.0652148	-0.0527236	-0.174155	-0.045636	-0.140825	-0.0795107	-0.0560631	0.0651226	-0.181214	-0.130665	-0.133407	-0.182141	-0.163107	-0.168252	-0.167721	-0.152406	-0.154994	-0.177722	-0.175208	-0.136337	-0.183133	-0.134162	0.0780266	-0.136321	-0.161503	-0.112143	-0.189527	0.104238	-0.0245581	-0.206022	-0.185455
Bacillus dafuensis	0.460643	0.756735	-0.0424909	-0.0723566	0.425328	0.0472409	0.240377	-0.0475737	-0.0402215	-0.0368451	-0.0547796	-0.0518571	-0.0313763	-0.0567435	-0.0484256	0.453751	0.324737	-0.163154	-0.0550662	-0.0667817	0.879194	-0.0457559	0.222952	0.0155923	-0.0597301	0.737422	0.534126	0.135863	0.217542	0.164504	0.841572	0.782257	0.714056	0.30162	0.0912893	0.823723	0.0197282	0.0416211	0.131075	0.0973231	-0.0144594	0.113444	-0.00991473	-0.193987	0.108678	0.124426	0.611443	0.260345	0.318949
Bacillus cereus	-0.186887	0.0123827	0.372036	0.376887	0.362728	0.333634	0.280389	0.377945	0.357217	0.361467	0.359729	0.378702	0.372798	0.381726	0.373592	-0.0220468	0.0182684	0.0198075	0.209719	0.346421	-0.165832	0.323902	-0.00597926	0.107119	0.327349	0.0561341	-0.239948	-0.183703	-0.152307	0.0155429	-0.173049	-0.196547	-0.136781	-0.215772	-0.236836	-0.162221	-0.249139	-0.0889493	-0.231721	-0.195581	-0.128506	-0.111753	-0.161	-0.10482	-0.116992	0.069533	-0.234353	-0.139042	0.0192785
Bacillus thuringiensis	-0.260962	-0.0138659	0.608758	0.619331	0.554064	0.573647	0.509129	0.615349	0.595733	0.598214	0.597784	0.616241	0.611579	0.621378	0.610515	-0.0324064	-0.00353487	0.0213825	0.4093	0.582449	-0.111134	0.560131	0.095649	0.258089	0.55335	0.0191017	-0.220291	-0.212087	-0.172374	0.168471	-0.149934	-0.188505	-0.106568	-0.187091	-0.236494	-0.117835	-0.271431	-0.0065465	-0.202069	-0.186603	-0.145422	-0.056586	-0.135826	-0.121489	-0.0510428	0.0198529	-0.256525	-0.0711462	0.11903
Bacillus mycoides	-0.0589301	-0.00554706	-0.0178227	-0.0131057	0.0482412	-0.0503537	-0.0857925	-0.0130672	-0.0316227	-0.0263735	-0.0273613	-0.0118488	-0.0161137	-0.0105991	-0.0145137	-0.0193538	0.0304853	0.00772492	-0.0779027	-0.0414287	-0.195529	-0.0372687	-0.157819	-0.0946506	-0.0526905	0.114344	-0.188736	-0.164117	-0.14546	-0.184273	-0.171477	-0.166547	-0.155436	-0.203588	-0.183965	-0.191803	-0.201269	-0.170856	-0.205527	-0.167671	-0.113035	-0.163538	-0.131557	-0.0952103	-0.166058	0.139635	-0.207841	-0.167297	-0.177631
Parageobacillus toebii	-0.544542	-0.219702	0.496975	0.505057	0.277831	0.502012	0.38502	0.505436	0.481916	0.497087	0.497947	0.50478	0.502616	0.511725	0.500311	-0.150273	-0.0117582	-0.00506045	0.313709	0.511432	-0.206633	0.437867	0.0337601	0.164519	0.433492	-0.248088	-0.25846	-0.233287	-0.183036	0.543713	-0.0182063	-0.19997	-0.0816676	-0.202022	-0.255995	-0.166632	-0.117719	-0.0352666	-0.220964	-0.180541	-0.0821942	-0.100527	-0.159231	0.369875	-0.0576643	-0.145116	-0.285767	0.108875	0.382915
Amphibacillus xylanus	0.218865	-0.0234823	0.326854	0.354349	0.362335	0.369369	0.396357	0.32865	0.425741	0.344165	0.397613	0.328505	0.326155	0.33937	0.330054	-0.0716546	0.0513871	-0.0942182	0.69415	0.411725	0.0265264	0.501637	0.726887	0.631982	0.471726	-0.116436	0.435281	0.564397	0.444504	0.483632	-0.0749145	0.113692	-0.0500852	0.619663	0.655623	0.250157	0.539163	0.717802	0.76255	0.582786	0.0608177	0.686163	0.562519	0.0380359	0.671646	-0.165943	0.392441	0.392746	0.404806
Priestia aryabhattai	-0.503278	-0.100643	0.00625372	0.0221523	-0.126255	0.0270902	-0.0562055	0.0149296	-0.00629752	0.00507963	0.0404923	0.0144346	0.0153593	0.019988	0.010296	-0.166511	-0.274034	-0.0641076	-0.0577316	0.0434056	-0.21215	0.0057653	-0.156667	-0.107691	-0.02765	-0.157596	-0.212656	-0.148061	-0.0181879	0.164594	0.0474338	-0.0671372	-0.0391035	-0.213816	-0.226931	-0.214673	-0.029417	-0.142288	-0.196914	-0.178117	0.607067	-0.168103	0.00206692	0.24261	-0.0846802	-0.0720406	-0.234433	0.0296804	0.200286
Priestia megaterium	-0.616147	-0.176439	0.8021	0.822862	0.539448	0.78305	0.679061	0.809673	0.788906	0.798197	0.812392	0.809941	0.804637	0.815397	0.804434	-0.123268	-0.183912	0.124207	0.562736	0.792571	-0.166057	0.758131	0.156564	0.328262	0.740611	-0.266058	-0.244461	-0.229705	-0.176004	0.453299	-0.119356	-0.220093	-0.0442209	-0.227428	-0.284285	-0.139807	-0.227929	0.0477301	-0.206572	-0.212011	-0.086847	-0.0458874	0.031848	0.100318	0.0881381	-0.196985	-0.316058	0.100995	0.373896
Anoxybacillus kamchatkensis	-0.13752	-0.17515	-0.0306654	-0.0256236	-0.143488	-0.0539289	-0.0992754	-0.0261983	-0.0436796	-0.0360698	-0.0378445	-0.0262695	-0.0297877	-0.0196214	-0.0263657	-0.136071	0.638409	-0.017987	-0.0647956	-0.0312734	-0.192608	-0.0488331	-0.134271	-0.0819931	-0.0555893	-0.122853	-0.193833	-0.143883	-0.1395	-0.119365	-0.177699	-0.173529	-0.131031	-0.135793	-0.111671	-0.167297	-0.0723235	-0.0967188	-0.118442	-0.109067	-0.0666952	-0.104363	-0.109223	-0.0541443	-0.0196287	0.097174	-0.186897	-0.0679928	-0.0785057
Lysinibacillus fusiformis	0.0231865	0.0594854	0.0888949	-0.0253424	0.0236198	0.0982858	0.0705338	0.0662319	-0.0333681	0.122886	0.103023	0.0752448	0.0984026	-0.019276	0.119669	0.913075	0.00476771	0.0158153	-0.0628546	-0.0480588	-0.172384	-0.0415236	-0.140161	-0.0784873	-0.0520054	0.0649055	-0.183896	-0.129272	-0.135226	-0.180566	-0.16231	-0.169602	-0.16691	-0.151921	-0.157259	-0.177102	-0.176731	-0.13823	-0.185116	-0.132521	0.0777609	-0.136082	-0.164252	-0.106123	-0.190159	0.103465	-0.0251594	-0.205375	-0.184164
Gemella morbillorum	-0.328032	0.0627413	-0.0217713	-0.0165425	-0.0834065	-0.0186802	-0.0646302	-0.0155742	-0.0326014	-0.0255071	0.0173473	-0.0157604	-0.0188556	-0.0138591	-0.0177559	-0.0918559	-0.152244	0.0125824	-0.0530671	-0.030708	-0.133022	-0.0186249	-0.131678	-0.101144	-0.0447561	-0.109295	-0.17733	-0.090352	0.0492851	-0.0966447	-0.0793792	-0.0156946	-0.0920842	-0.190594	-0.185564	-0.134299	-0.0956562	-0.135591	-0.168208	-0.137386	0.79997	-0.121563	-0.132666	-0.0512257	-0.132335	-0.0919154	-0.16921	-0.148803	-0.0386827
Streptococcus pneumoniae	-0.310946	0.220881	0.880083	0.884568	0.835633	0.889135	0.876901	0.885113	0.870076	0.874751	0.874318	0.88343	0.885456	0.887267	0.878791	0.0878582	0.00441289	0.0861163	0.626575	0.850961	0.225241	0.824827	0.321562	0.438306	0.825172	0.0722473	-0.0164652	-0.133373	-0.0224297	0.438441	0.149195	0.121303	0.174027	-0.111776	-0.200168	0.231563	-0.222949	0.116717	-0.117045	-0.120635	0.0846286	0.0853714	-0.0695716	-0.148936	0.0821488	-0.0850615	-0.0230879	0.118094	0.470637
Streptococcus thermophilus	-0.458591	-0.0564741	0.00106744	0.011162	-0.120596	-0.0108708	-0.074724	0.00819319	-0.0145768	-0.0033723	0.0357978	0.00890774	0.00460976	0.00987633	0.00780706	-0.103034	-0.109416	-0.041372	-0.0505505	-0.0126341	-0.225814	0.00285247	-0.150543	-0.104765	-0.0261777	-0.201262	-0.226972	-0.12198	-0.0127038	-0.155463	-0.175257	-0.113191	-0.158074	-0.244723	-0.217098	-0.209992	-0.133337	-0.128536	-0.2142	-0.173309	0.693149	-0.145009	-0.129304	-0.0919607	-0.148776	-0.145162	-0.241254	-0.192052	-0.0614142
Streptococcus sp. A12	-0.308177	0.0431631	-0.0301012	-0.0256294	-0.10252	-0.0251335	-0.0697615	-0.0246067	-0.0394257	-0.0326656	0.010877	-0.024827	-0.0276348	-0.0232876	-0.0265316	-0.0976803	-0.160899	-0.0207557	-0.0535637	-0.0362743	-0.132039	-0.0257578	-0.116596	-0.0935037	-0.0481079	-0.131707	-0.164815	-0.0684012	0.0717509	-0.0909396	-0.0959043	-0.0204047	-0.107634	-0.163139	-0.155267	-0.134112	-0.0617847	-0.116769	-0.135377	-0.112966	0.822783	-0.100398	-0.110295	-0.0336991	-0.104261	-0.100455	-0.153412	-0.134469	-0.0336777
Streptococcus salivarius	-0.428985	-0.225336	-0.000200303	0.0155051	-0.126551	-0.0284967	-0.082407	0.00449977	-0.0189995	-0.00243751	-0.00099595	0.00584496	0.00401007	0.00445424	0.00710172	-0.0237059	-0.157615	0.126689	-0.0599983	-0.0181265	-0.233366	-0.00754976	-0.13774	-0.102842	-0.025104	-0.189811	-0.172619	-0.165047	-0.153857	-0.123443	-0.181035	-0.194199	-0.145616	-0.217505	-0.206102	-0.208836	-0.196556	-0.0959843	-0.2392	-0.17733	-0.0701191	-0.150298	-0.0490032	-0.0635188	-0.157558	-0.100596	-0.239547	-0.155642	-0.0265935
Streptococcus australis	-0.321801	0.0392585	-0.0236675	-0.0188459	-0.0976974	-0.0206221	-0.0676706	-0.0178496	-0.0338431	-0.0267583	0.016765	-0.0180389	-0.0210553	-0.0163474	-0.0198657	-0.100028	-0.153777	-0.00675601	-0.0513589	-0.0308039	-0.142028	-0.0206339	-0.122435	-0.0951372	-0.0435933	-0.132438	-0.175399	-0.0780378	0.06252	-0.0968625	-0.103456	-0.0305257	-0.113344	-0.174993	-0.166472	-0.143428	-0.0728045	-0.123711	-0.147807	-0.12361	0.814901	-0.108456	-0.118617	-0.0403361	-0.111649	-0.0981811	-0.165246	-0.143542	-0.038017
Streptococcus parasanguinis	-0.66787	-0.280103	0.000703436	0.00702217	-0.20165	-0.0280388	-0.12383	0.00756172	-0.0357212	1.76471e-05	0.0163041	0.00965973	0.00815146	0.00128381	0.0144856	-0.028089	-0.0948473	0.265525	-0.0771999	-0.0299743	-0.368309	-0.0186255	-0.233918	-0.155492	-0.0528329	-0.293864	-0.3042	-0.235262	-0.194537	-0.145144	-0.263219	-0.283857	-0.211957	-0.349565	-0.311237	-0.335253	-0.235754	-0.183117	-0.346381	-0.275935	0.198231	-0.237356	-0.172924	-0.0257288	-0.23018	-0.144651	-0.357135	-0.235582	-0.0802937
Streptococcus suis	-0.479173	-0.0827457	0.839998	0.848762	0.614735	0.817137	0.739252	0.844291	0.819913	0.836669	0.838179	0.84508	0.842498	0.842995	0.843419	0.00533069	-0.134348	0.0853935	0.589944	0.816376	-0.0940915	0.779839	0.219805	0.384674	0.783053	-0.195988	-0.19366	-0.181935	-0.133349	0.366091	-0.119454	-0.163147	-0.0549142	-0.196704	-0.2273	-0.0656103	-0.229661	0.094419	-0.164408	-0.157403	-0.0522035	0.0213847	-0.0280658	-0.0465445	0.0509968	-0.153829	-0.230338	0.0396867	0.349309
Streptococcus ilei	-0.333708	0.0342913	-0.0149395	-0.00980387	-0.0990007	-0.0100097	-0.0565223	-0.00919084	-0.0246796	-0.0175021	0.0261198	-0.00946494	-0.0122609	-0.00768605	-0.0111864	-0.103022	-0.156419	-0.00195854	-0.0422198	-0.0203736	-0.133459	-0.0111778	-0.112404	-0.0873959	-0.0337243	-0.146681	-0.167093	-0.0717936	0.0684178	-0.0795251	-0.0939538	-0.0220149	-0.101006	-0.169132	-0.159737	-0.133857	-0.0638382	-0.114623	-0.138934	-0.117983	0.820175	-0.100979	-0.110212	-0.030133	-0.0991293	-0.111776	-0.157554	-0.12887	-0.0222259
Streptococcus koreensis	-0.340124	0.0489994	0.0783909	0.0839012	-0.0153967	0.0824217	0.0343131	0.0841191	0.0685695	0.0752493	0.11837	0.0837901	0.080715	0.0858941	0.0816068	-0.0994632	-0.155531	-0.00853278	0.0286252	0.0711437	-0.117215	0.0770056	-0.0734741	-0.0347707	0.0566779	-0.145535	-0.168256	-0.0785513	0.0664753	-0.0379507	-0.0920563	-0.0191811	-0.0932524	-0.170078	-0.165171	-0.11627	-0.0767224	-0.0928186	-0.134496	-0.118771	0.811888	-0.083019	-0.104632	-0.0471027	-0.0795817	-0.116654	-0.159227	-0.112945	0.0153497
Lactococcus piscium	-0.362714	0.00861268	-0.0268996	-0.0187785	-0.111926	-0.0293253	-0.0797522	-0.0208033	-0.038717	-0.0303223	0.0115426	-0.020672	-0.0240728	-0.0191899	-0.0223828	-0.0943618	-0.189125	-0.0340782	-0.0635235	-0.0371623	-0.167728	-0.0234347	-0.133776	-0.107089	-0.0476466	-0.151337	-0.188219	-0.0954331	0.0420717	-0.128535	-0.129987	-0.0540116	-0.134145	-0.196416	-0.186841	-0.164719	-0.102708	-0.125687	-0.174909	-0.141269	0.773505	-0.122956	-0.108762	-0.0696555	-0.130955	-0.113702	-0.190828	-0.164908	-0.0426378
Limosilactobacillus fermentum	-0.395069	-0.26738	-0.0480819	-0.0489283	-0.182432	-0.0918921	-0.139827	-0.0424759	-0.0676273	-0.0590761	-0.0558426	-0.0411333	-0.0470887	-0.0381429	-0.0421749	-0.139841	0.580771	-0.0441544	-0.109045	-0.051844	-0.257866	-0.0744217	-0.187869	-0.134229	-0.0805798	-0.228148	-0.142184	-0.111316	-0.211921	-0.25343	-0.151581	-0.26902	-0.12858	-0.237551	-0.103764	-0.20753	-0.00974655	-0.122688	-0.152462	-0.179078	-0.131035	-0.17448	-0.175196	-0.0864278	-0.0464376	-0.152404	-0.19493	-0.174782	-0.201267
Latilactobacillus sakei	-0.285642	0.0544434	-0.0287213	-0.0246963	-0.0945528	-0.0235058	-0.0645877	-0.0235111	-0.0373063	-0.031373	0.0121112	-0.0237577	-0.0264729	-0.0223065	-0.0254567	-0.0929291	-0.155784	-0.0277748	-0.0499725	-0.0346415	-0.121743	-0.0237225	-0.10786	-0.087708	-0.0451119	-0.122013	-0.156711	-0.0601568	0.0803	-0.0965268	-0.092756	-0.0129322	-0.104071	-0.152276	-0.145076	-0.124567	-0.0563958	-0.110132	-0.124298	-0.104094	0.826479	-0.0916422	-0.103301	-0.0447107	-0.0956137	-0.0943054	-0.142026	-0.131156	-0.035285
Leuconostoc carnosum	-0.299943	0.0516816	-0.0337722	-0.0289841	-0.0978167	-0.0307915	-0.0739558	-0.0282499	-0.0433272	-0.0368939	0.00624806	-0.0283711	-0.0313831	-0.0269116	-0.0301582	-0.0914877	-0.160766	-0.030137	-0.0589852	-0.0416669	-0.132998	-0.0292643	-0.120956	-0.0977518	-0.0522477	-0.119458	-0.167387	-0.0711412	0.0673617	-0.111466	-0.0989009	-0.0213948	-0.110469	-0.168209	-0.160643	-0.135581	-0.0734702	-0.120513	-0.142846	-0.116511	0.814699	-0.104555	-0.112039	-0.05343	-0.112994	-0.0940135	-0.156303	-0.145522	-0.0449252
Lactobacillus helveticus	-0.292519	0.052196	-0.0298587	-0.025609	-0.0911639	-0.0274825	-0.0718213	-0.024275	-0.0394929	-0.0331897	0.0100754	-0.0244184	-0.0275126	-0.0229206	-0.0263331	-0.0936955	-0.15386	-0.0262923	-0.05603	-0.0376502	-0.138472	-0.026643	-0.120715	-0.0955675	-0.0488916	-0.114536	-0.174102	-0.0723982	0.0679236	-0.110042	-0.106486	-0.0289456	-0.117711	-0.167908	-0.161152	-0.141919	-0.072347	-0.123509	-0.14321	-0.117912	0.813437	-0.105275	-0.115791	-0.0502556	-0.111903	-0.0849204	-0.159421	-0.147219	-0.0476833
Pediococcus acidilactici	-0.392421	0.0151014	0.0899373	0.0967189	-0.0218778	0.090807	0.0358279	0.096496	0.0786441	0.0857313	0.129702	0.0961903	0.0927551	0.0990044	0.0937192	-0.114443	-0.120728	-0.0176088	0.0303384	0.0845647	-0.146087	0.0860693	-0.0784819	-0.0411458	0.0644356	-0.175512	-0.185189	-0.0937976	0.0455175	-0.041114	-0.102553	-0.0491823	-0.107218	-0.185778	-0.178475	-0.134289	-0.0797544	-0.097505	-0.151748	-0.132821	0.797083	-0.0964372	-0.109803	-0.0487865	-0.0788556	-0.13825	-0.181621	-0.117617	0.0220306
Enterococcus faecalis	-0.21659	0.084763	0.999184	0.989586	0.835677	0.987442	0.941078	0.999015	0.97984	0.997889	0.993051	0.999395	0.99924	0.991834	0.999594	0.103962	-0.0136982	0.0516762	0.732595	0.970055	0.0586365	0.917255	0.352632	0.521755	0.942859	-0.0592605	-0.105851	-0.112201	-0.0615881	0.465704	-0.0397093	-0.0621542	0.0169533	-0.0840614	-0.128435	0.0751765	-0.16494	0.169533	-0.0382063	-0.0742936	-0.0607272	0.124053	-0.0306554	-0.0766284	0.149048	-0.069116	-0.0926082	0.106329	0.400094
Enterococcus faecium	-0.438788	-0.248064	-0.0303336	0.00645034	-0.154604	-0.0625741	-0.109723	-0.0262115	-0.0485112	-0.0336807	-0.0236262	-0.0233669	-0.0288185	-0.0261639	-0.0237632	-0.0879704	-0.239539	-0.0355661	-0.0973391	-0.0615681	-0.238963	0.0308035	-0.138088	-0.122572	-0.0663912	-0.205964	-0.227381	-0.169154	-0.144452	-0.232491	-0.197311	-0.218815	0.0321183	-0.221357	-0.214787	-0.220446	-0.214466	-0.113735	-0.241809	-0.165766	-0.117154	-0.165948	0.308628	-0.138894	0.0334516	-0.140824	-0.249389	0.151722	-0.18122
Abiotrophia defectiva	-0.318906	0.0534922	-0.0136778	-0.00884514	-0.0820411	-0.00977879	-0.0529904	-0.00767767	-0.0237946	-0.0174714	0.0257966	-0.0081939	-0.010692	-0.00602874	-0.00995874	-0.0962248	-0.148216	0.0859213	-0.0370953	-0.020295	-0.126644	-0.0101168	-0.113385	-0.0884875	-0.0326757	-0.118418	-0.165332	-0.0786491	0.0640907	-0.0892501	-0.0880866	-0.0169391	-0.0927155	-0.171204	-0.163982	-0.125397	-0.0778211	-0.124241	-0.145031	-0.122638	0.808415	-0.102815	-0.122303	-0.0501083	-0.10689	-0.0778192	-0.152161	-0.135717	-0.031747
Blautia wexlerae	-0.591189	-0.267105	-0.0391003	-0.0334237	-0.204711	-0.0274567	-0.141043	-0.0317092	-0.0597904	-0.0325586	-0.0191812	-0.0308777	-0.0316046	-0.0313738	-0.0312677	-0.119308	-0.302096	-0.0383471	-0.110099	-0.0327229	-0.310548	-0.0628966	-0.239866	-0.160976	-0.0891939	-0.260199	-0.260131	-0.217134	-0.158658	0.279104	-0.0514019	-0.186969	-0.143081	-0.273983	-0.287971	-0.304391	-0.0957988	-0.189725	-0.2975	-0.230323	0.162822	-0.241725	-0.187501	0.444822	-0.253664	-0.18003	-0.315441	-0.0571981	0.140539
Blautia massiliensis	-0.528766	-0.090978	-0.0457671	-0.0395783	-0.178226	-0.0421085	-0.129031	-0.0376066	-0.0638878	-0.0467409	-0.00566908	-0.0372317	-0.0402804	-0.0360534	-0.0390259	-0.135298	-0.224373	-0.0309914	-0.101257	-0.0484055	-0.25992	-0.0546173	-0.214967	-0.157472	-0.0850815	-0.224819	-0.255046	-0.15635	-0.0310406	0.00496853	-0.105819	-0.118161	-0.159041	-0.273429	-0.260413	-0.255585	-0.0994061	-0.187931	-0.254628	-0.205566	0.722655	-0.201025	-0.186043	0.138506	-0.204199	-0.164273	-0.275511	-0.158181	0.00931194
Blautia sp. SC05B48	-0.570702	-0.118124	-0.0487138	-0.0376743	-0.194802	-0.0485326	-0.138537	-0.0402453	-0.068008	-0.0499073	-0.00812721	-0.0395878	-0.043297	-0.0385002	-0.0414523	-0.144841	-0.254712	-0.0375694	-0.109765	-0.0549716	-0.279241	-0.0490899	-0.223506	-0.167387	-0.090085	-0.247809	-0.274504	-0.170277	-0.0425928	-0.0215018	-0.129178	-0.137453	-0.150481	-0.291043	-0.278436	-0.272895	-0.122883	-0.194247	-0.275192	-0.218005	0.703082	-0.213267	-0.141933	0.117987	-0.193709	-0.181098	-0.297268	-0.135684	-0.00974766
Blautia sp. NBRC 113351	-0.401044	-0.228381	-0.0176139	0.0201248	-0.131718	-0.0458349	-0.0888646	-0.0133378	-0.0314334	-0.0216538	-0.00983085	-0.0108501	-0.01664	-0.0113426	-0.0125916	-0.120541	-0.196712	-0.0171802	-0.0757198	-0.0427285	-0.210184	0.0507792	-0.116988	-0.101532	-0.0513085	-0.191803	-0.214244	-0.149717	-0.124949	-0.20003	-0.169501	-0.199915	0.0746671	-0.19726	-0.187644	-0.195772	-0.180525	-0.104642	-0.207729	-0.143748	-0.10365	-0.147399	0.332413	-0.11526	0.0812649	-0.129317	-0.224075	0.20871	-0.182899
Blautia obeum	-0.725033	-0.28238	0.237873	0.256291	0.00488301	0.222049	0.105926	0.24606	0.209576	0.238575	0.253205	0.247791	0.244731	0.246139	0.246992	-0.0965114	-0.325989	-0.00798143	0.0793723	0.221699	-0.327516	0.213714	-0.142565	-0.0333769	0.175273	-0.316616	-0.313423	-0.267374	-0.197355	0.167816	-0.164859	-0.253576	-0.145025	-0.341653	-0.350559	-0.304724	-0.233489	-0.134893	-0.349369	-0.27628	0.122699	-0.216871	-0.0811104	0.169265	-0.176676	-0.22221	-0.382506	-0.0547461	0.143171
Blautia argi	-0.729168	-0.3842	-0.0423931	-0.0234424	-0.254069	-0.0459993	-0.171656	-0.0334503	-0.0677737	-0.0386	-0.0272143	-0.0316968	-0.0339816	-0.0317084	-0.0326493	-0.168226	-0.281811	0.0262679	-0.128677	-0.0381593	-0.389217	-0.0438098	-0.273712	-0.187993	-0.103178	-0.335758	-0.319668	-0.264075	-0.232136	0.192824	-0.103153	-0.279478	-0.104725	-0.339405	-0.331383	-0.372006	-0.146125	-0.215749	-0.355527	-0.274434	-0.00855822	-0.287489	-0.068607	0.395465	-0.199014	-0.217581	-0.385927	0.0228962	0.0661318
Blautia producta	-0.79903	-0.393437	0.0169076	0.0474703	-0.220658	-0.00299169	-0.126267	0.026712	-0.0125847	0.0163376	0.034541	0.0288122	0.0246034	0.0281033	0.0277278	-0.189346	-0.293307	0.258844	-0.0800712	0.00353389	-0.409239	0.0413306	-0.260922	-0.169997	-0.0510988	-0.361609	-0.382742	-0.295405	-0.241895	0.036274	-0.194597	-0.333473	-0.0612064	-0.379549	-0.374861	-0.393576	-0.233736	-0.231074	-0.398153	-0.305109	0.00658487	-0.294183	0.0614518	0.204572	-0.118445	-0.202915	-0.430798	0.0727879	-0.0427279
uncultured Blautia sp.	-0.858096	-0.444425	-0.0508333	-0.0312199	-0.305634	-0.07045	-0.203404	-0.0399988	-0.0795838	-0.0520637	-0.0357239	-0.0378534	-0.0428169	-0.0361347	-0.0399023	-0.216679	-0.179878	-0.018909	-0.153393	-0.0468477	-0.451346	-0.0595691	-0.305737	-0.219329	-0.114127	-0.413597	-0.335689	-0.263388	-0.273118	0.0610374	-0.154425	-0.344426	-0.136609	-0.409765	-0.334645	-0.410491	-0.13677	-0.227589	-0.376089	-0.31761	0.0440275	-0.32434	-0.133218	0.307319	-0.20133	-0.283643	-0.423649	-0.0514657	-0.011665
Blautia liquoris	-0.675252	-0.3451	-0.0362141	-0.0186525	-0.230312	-0.0319717	-0.151647	-0.0275235	-0.0557108	-0.0319613	-0.0201847	-0.0264061	-0.0284536	-0.0239819	-0.0285128	-0.175242	-0.308599	-0.00541508	-0.11341	-0.0251502	-0.343686	-0.0402262	-0.248279	-0.169545	-0.0890017	-0.311508	-0.287925	-0.240844	-0.20062	0.25623	-0.0588785	-0.23461	-0.0947595	-0.298803	-0.3078	-0.332974	-0.115259	-0.194535	-0.324723	-0.248672	0.0303079	-0.262476	-0.0881205	0.433843	-0.203689	-0.213718	-0.35113	0.0255353	0.117306
A1erostipes hadrus	-0.396711	-0.0104475	-0.0378671	-0.0323616	-0.136689	-0.0312529	-0.0933805	-0.0314067	-0.0504062	-0.0392331	0.00401717	-0.0314355	-0.0339663	-0.0300829	-0.0330882	-0.111846	-0.205479	-0.0340648	-0.0726504	-0.0407883	-0.181345	-0.0377242	-0.152622	-0.11814	-0.0634544	-0.173327	-0.20153	-0.103282	0.0388714	-0.039386	-0.096074	-0.0532597	-0.12845	-0.200856	-0.197397	-0.1825	-0.0749366	-0.141617	-0.180972	-0.14618	0.803663	-0.137209	-0.132675	0.0441762	-0.143646	-0.129009	-0.201085	-0.138329	-0.00175762
A1erostipes rhamnosivorans	-0.806632	-0.404571	0.0115973	0.0455495	-0.225935	-0.00737916	-0.128371	0.0217888	-0.0132973	0.0105254	0.0272539	0.0238716	0.0187521	0.0265879	0.0209986	-0.210624	-0.296708	0.0471825	-0.0956112	0.00560389	-0.396779	0.0356764	-0.253267	-0.172301	-0.050646	-0.376611	-0.352086	-0.28068	-0.24294	0.0611505	-0.164627	-0.312836	-0.0609268	-0.372958	-0.360221	-0.374362	-0.210245	-0.208557	-0.385183	-0.293841	-0.00309168	-0.289537	0.0550192	0.228887	-0.13056	-0.253157	-0.419774	0.0729245	-0.00562302
[Ruminococcus] torques	-0.72677	-0.399728	-0.059806	-0.0395179	-0.276659	-0.0828641	-0.199112	-0.0507657	-0.0873286	-0.060089	-0.0505725	-0.0487265	-0.0526923	-0.0475555	-0.0491671	-0.155262	-0.0312947	-0.052188	-0.155426	-0.0642981	-0.412755	-0.0663889	-0.292313	-0.207809	-0.115634	-0.35123	-0.334707	-0.274554	-0.255653	0.0175459	-0.188666	-0.315848	-0.17445	-0.359643	-0.342683	-0.387594	-0.194604	-0.213526	-0.37902	-0.290501	-0.0389174	-0.293312	-0.0963979	0.214668	-0.221675	-0.235843	-0.40949	-0.106992	-0.00562977
[Ruminococcus] g1vus	-0.398604	-0.2191	-0.0348547	0.00132601	-0.145895	-0.0580811	-0.103277	-0.0306659	-0.0485532	-0.0377424	-0.0236665	-0.0282694	-0.0338614	-0.0292377	-0.0298508	-0.122294	-0.216763	-0.0254194	-0.0875607	-0.0589561	-0.208615	0.0342001	-0.125998	-0.110697	-0.0691885	-0.19073	-0.216892	-0.146208	-0.112823	-0.171901	-0.156118	-0.189437	0.0772253	-0.192915	-0.189303	-0.197109	-0.167215	-0.11378	-0.206427	-0.140522	-0.0558105	-0.150353	0.327898	-0.0738513	0.0751199	-0.132244	-0.220886	0.217756	-0.174383
[Eubacterium] rectale	-0.528747	-0.288939	-0.0485062	-0.0402277	-0.195416	-0.0402477	-0.13871	-0.0419037	-0.065649	-0.0453833	-0.0420807	-0.0410764	-0.03848	-0.0396808	-0.0423155	-0.0963493	-0.268227	-0.0438191	-0.113569	-0.0140656	-0.281847	-0.071547	-0.210606	-0.151125	-0.0906079	-0.242654	-0.215257	-0.198936	-0.18277	0.260413	0.0487189	-0.178968	-0.115296	-0.220677	-0.253201	-0.280424	-0.0772694	-0.144692	-0.274928	-0.192067	-0.0139083	-0.215877	-0.132553	0.407314	-0.236369	-0.170572	-0.277352	-0.0529107	0.213104
Roseburia intesti1lis	-0.466892	-0.254746	-0.0389937	-0.0330069	-0.168098	-0.0217625	-0.11582	-0.0328489	-0.0532135	-0.035751	-0.0308033	-0.0323342	-0.0288516	-0.0304264	-0.0342676	-0.113032	-0.228921	-0.0303733	-0.0940772	0.0059307	-0.245676	-0.0555968	-0.188536	-0.129836	-0.0817825	-0.215403	-0.202424	-0.176168	-0.158824	0.322063	0.112441	-0.149398	-0.0555409	-0.18203	-0.222983	-0.252615	-0.0278924	-0.137993	-0.234597	-0.161709	0.00556391	-0.195501	-0.0965634	0.463991	-0.181896	-0.151972	-0.239313	0.0299555	0.230509
Roseburia hominis	-0.725745	-0.390996	-0.0530553	-0.0381022	-0.260467	-0.0642963	-0.184276	-0.0441908	-0.0781403	-0.0527141	-0.0441933	-0.0423264	-0.0444583	-0.0417153	-0.043953	-0.149603	-0.301295	-0.0515579	-0.14789	-0.0436364	-0.391952	-0.0715441	-0.278962	-0.201136	-0.110021	-0.337907	-0.276731	-0.25108	-0.253854	0.126449	-0.0727214	-0.292863	-0.157156	-0.341224	-0.311316	-0.364574	-0.120023	-0.195246	-0.352173	-0.279346	-0.0291695	-0.290261	-0.139883	0.331108	-0.249545	-0.233739	-0.372819	-0.0750094	0.078249
Roseburia sp. NSJ-69	-0.535394	-0.282676	-0.0289179	-0.023143	-0.182009	-0.0142517	-0.118985	-0.0220515	-0.0460158	-0.0249854	-0.019204	-0.0214346	-0.0187881	-0.0198651	-0.0230235	-0.118083	-0.246877	-0.0310874	-0.0958204	0.00893478	-0.278339	-0.0530977	-0.209178	-0.140299	-0.0757658	-0.2477	-0.22421	-0.197551	-0.177069	0.326802	0.0735442	-0.173961	-0.0921061	-0.219069	-0.251866	-0.280114	-0.0489109	-0.153596	-0.265322	-0.190903	0.0223098	-0.217209	-0.141427	0.478664	-0.217122	-0.173563	-0.274781	-0.00945254	0.228963
A1erobutyricum hallii	-0.563789	-0.304429	-0.0348458	-0.0211925	-0.197117	-0.0418552	-0.136348	-0.0283685	-0.0547887	-0.0314961	-0.0287139	-0.0269909	-0.0279463	-0.0272332	-0.026986	-0.0815306	-0.277542	-0.0396383	-0.10966	-0.0334273	-0.302036	-0.0516608	-0.211166	-0.150926	-0.0752207	-0.256908	-0.226636	-0.212589	-0.192193	0.133196	-0.092215	-0.211868	-0.151389	-0.260644	-0.269175	-0.286138	-0.147738	-0.146792	-0.296406	-0.218463	-0.0541886	-0.21976	-0.111387	0.267593	-0.234636	-0.176872	-0.305403	-0.0927218	0.103035
Coprococcus comes	-0.636242	-0.31728	0.00549873	0.0213706	-0.189593	-0.0217967	-0.115839	0.0133234	-0.0188725	0.00306459	0.0129243	0.0150077	0.0113035	0.0160727	0.0146881	-0.110339	-0.0265582	-0.0499853	-0.0916458	-0.00191301	-0.343852	-0.0129623	-0.219999	-0.148402	-0.038183	-0.307432	-0.270873	-0.225247	-0.208743	-0.0442321	-0.189626	-0.26579	-0.190694	-0.317265	-0.289386	-0.314249	-0.187098	-0.156352	-0.320703	-0.252637	0.0413041	-0.232734	-0.13059	0.0787688	-0.205749	-0.212533	-0.347448	-0.177167	0.00657187
Coprococcus catus	-0.517544	-0.280962	-0.0434275	-0.0406519	-0.190395	-0.0268431	-0.132113	-0.036857	-0.0600252	-0.0379419	-0.0334787	-0.0362302	-0.0342528	-0.0353487	-0.0373081	-0.117927	-0.220653	-0.0385225	-0.101943	-0.0107623	-0.277088	-0.0689964	-0.211666	-0.141281	-0.089339	-0.237569	-0.219222	-0.188481	-0.175733	0.346118	0.0564656	-0.172639	-0.0898098	-0.216535	-0.237931	-0.275824	-0.0355366	-0.156396	-0.252153	-0.188339	0.000583399	-0.216799	-0.167407	0.510024	-0.21817	-0.166023	-0.265786	-0.00421988	0.204615
[Clostridium] scindens	-0.479138	-0.267925	-0.0424244	-0.0218192	-0.183799	-0.0752801	-0.133399	-0.0365574	-0.0601636	-0.0461615	-0.0435574	-0.03524	-0.0378686	-0.0343929	-0.0348926	-0.0657576	-0.131592	0.210316	-0.0900277	-0.0569373	-0.260209	-0.0413577	-0.169391	-0.132654	-0.0671573	-0.22425	-0.188357	-0.175278	-0.173523	-0.169128	-0.194123	-0.22416	-0.147332	-0.239019	-0.218604	-0.237444	-0.199321	-0.116037	-0.25803	-0.191557	-0.0979649	-0.170516	-0.0356749	-0.0694565	-0.152656	-0.115631	-0.266504	-0.160117	-0.0623301
[Clostridium] symbiosum	-0.564603	-0.333025	-0.0475086	-0.047424	-0.21637	-0.0850877	-0.154094	-0.0410797	-0.0690968	-0.0558169	-0.0524602	-0.0385395	-0.0440209	-0.0408082	-0.0400532	-0.136179	-0.0973018	-0.0245932	-0.113612	-0.0341834	-0.318328	-0.0736599	-0.153438	-0.144783	-0.0809843	-0.280938	-0.160379	-0.0617486	-0.241471	-0.181795	-0.129889	-0.298446	-0.0158471	-0.295887	-0.0850359	-0.244705	-0.0210843	-0.0962708	-0.160208	-0.200134	-0.114033	-0.217176	-0.20871	0.0580129	-0.0610513	-0.196457	-0.207591	-0.075089	-0.187828
[Clostridium] hylemo1e	-0.694131	-0.349203	-0.0506765	-0.0376408	-0.25598	-0.0584035	-0.176643	-0.0426267	-0.0772314	-0.0458485	-0.0325944	-0.0407938	-0.0455128	-0.0427486	-0.0406625	-0.151649	-0.234683	-0.0286246	-0.136217	-0.0672507	-0.374323	-0.05916	-0.268217	-0.191112	-0.107759	-0.32142	-0.308656	-0.238693	-0.210772	0.126456	-0.181829	-0.272238	-0.12247	-0.345145	-0.307078	-0.350183	-0.147693	-0.214994	-0.332365	-0.275525	0.0541075	-0.28248	-0.128204	0.335827	-0.201762	-0.216402	-0.366508	-0.0243401	-0.0200308
Dorea longicate1	-0.528145	-0.269177	-0.0432064	-0.0267237	-0.194313	-0.0608778	-0.140331	-0.0371353	-0.0629268	-0.0420075	-0.0358609	-0.035562	-0.0383813	-0.0362328	-0.0351956	-0.0692652	-0.245094	-0.041757	-0.113467	-0.0574145	-0.287953	-0.051547	-0.197225	-0.150119	-0.0771338	-0.240726	-0.216073	-0.194814	-0.167665	-0.0139068	-0.163971	-0.207502	-0.161836	-0.261227	-0.25257	-0.265751	-0.176959	-0.136952	-0.282084	-0.212068	0.00503736	-0.202835	-0.0815558	0.107122	-0.208891	-0.163416	-0.292138	-0.127688	0.0115292
Lachnospiraceae bacterium	-0.752079	-0.429692	-0.062545	-0.0502328	-0.288542	-0.075133	-0.204342	-0.0528034	-0.0899225	-0.0622169	-0.0543141	-0.0511541	-0.0537433	-0.0493919	-0.052318	-0.195902	0.00663425	0.0400769	-0.149068	-0.0469392	-0.423321	-0.0803458	-0.303285	-0.207611	-0.125072	-0.363879	-0.333943	-0.263214	-0.2804	0.146509	-0.108521	-0.328241	-0.129529	-0.359652	-0.32056	-0.398861	-0.117931	-0.229191	-0.357845	-0.292012	-0.0834918	-0.309685	-0.163917	0.38842	-0.205249	-0.232031	-0.398318	-0.0506152	0.0332241
Lachnospiraceae bacterium GAM79	-0.741856	-0.399339	-0.0493319	-0.0408045	-0.266335	-0.0577483	-0.182998	-0.0400241	-0.0738853	-0.0488388	-0.0394662	-0.0382426	-0.0409673	-0.0375574	-0.0401843	-0.182308	-0.229801	-0.0460503	-0.135697	-0.0250129	-0.402921	-0.0728254	-0.25747	-0.190902	-0.103827	-0.352861	-0.298545	-0.206502	-0.256973	0.164876	-0.0759451	-0.301342	-0.0910567	-0.34457	-0.271525	-0.366646	-0.0847722	-0.187566	-0.314946	-0.268789	-0.00507072	-0.293534	-0.207562	0.408045	-0.208999	-0.245823	-0.355287	-0.0402396	0.0503334
Enterocloster bolteae	-0.403327	-0.252175	-0.043326	-0.044539	-0.167664	-0.0843148	-0.123847	-0.0383584	-0.0569874	-0.0535278	-0.0525086	-0.0363786	-0.0424233	-0.0363341	-0.038237	-0.124425	0.0942669	-0.0424687	-0.0835243	-0.0223479	-0.237631	-0.0615698	-0.0735313	-0.100953	-0.055469	-0.213959	-0.143491	0.0126952	-0.188232	-0.252551	-0.161388	-0.241516	0.0539725	-0.216812	-0.0133101	-0.170744	-0.033059	-0.0429601	-0.0839143	-0.13437	-0.115202	-0.154906	-0.194178	-0.054371	0.0120629	-0.155225	-0.132352	-0.0768796	-0.234537
Enterocloster clostridioformis	-0.754239	-0.448634	-0.0621218	-0.0507967	-0.29487	-0.100411	-0.208978	-0.0527026	-0.0878884	-0.0692626	-0.062346	-0.0499287	-0.0568018	-0.0493142	-0.0524223	-0.207369	-0.10553	-0.0542702	-0.15341	-0.0475714	-0.434449	-0.0800638	-0.236866	-0.200657	-0.111561	-0.383045	-0.302379	-0.165785	-0.301906	-0.105943	-0.195154	-0.378835	-0.0503621	-0.38213	-0.214772	-0.367785	-0.111889	-0.1671	-0.291561	-0.282002	-0.119106	-0.304198	-0.199665	0.169088	-0.12555	-0.251695	-0.349916	-0.0607944	-0.155249
A1erocolum1 sedimenticola	-0.773293	-0.401774	-0.0158338	0.00518214	-0.244207	-0.0247266	-0.150931	-0.00588306	-0.0396158	-0.0142921	-0.00357112	-0.00445155	-0.00756488	-0.00138992	-0.0068124	-0.19074	-0.283845	0.039727	-0.112468	-0.00652	-0.391563	-0.0261636	-0.264103	-0.180467	-0.072199	-0.360578	-0.311567	-0.264106	-0.244535	0.178522	-0.110723	-0.288056	-0.119394	-0.354923	-0.332289	-0.3683	-0.154013	-0.20438	-0.36016	-0.286981	-0.0125528	-0.289875	-0.110125	0.367908	-0.209604	-0.238138	-0.395128	-0.0215436	0.0855877
Lachnospira eligens	-0.497516	-0.264335	-0.0272426	-0.0204146	-0.167385	-0.0150166	-0.109421	-0.0207301	-0.0426023	-0.0253096	-0.0208805	-0.0201624	-0.0164037	-0.017877	-0.0220234	-0.102134	-0.235871	-0.0356473	-0.0905294	0.0187832	-0.256759	-0.0505222	-0.18758	-0.130183	-0.068348	-0.228188	-0.20281	-0.182285	-0.168387	0.283402	0.0975781	-0.157991	-0.0864134	-0.196296	-0.233054	-0.259493	-0.0497748	-0.129087	-0.248881	-0.172072	0.0203618	-0.197457	-0.123384	0.413482	-0.208017	-0.159298	-0.252869	-0.0277097	0.244242
Faecalicate1 sp. Marseille-Q4148	-0.738793	-0.385151	-0.0237032	0.00174633	-0.239976	-0.0359514	-0.155242	-0.015216	-0.05041	-0.0209646	-0.00851195	-0.0130035	-0.0168629	-0.0139255	-0.0137723	-0.157378	-0.313129	-0.014135	-0.123141	-0.0347484	-0.387178	-0.012741	-0.263117	-0.184153	-0.0849157	-0.340164	-0.331726	-0.274062	-0.232756	0.106427	-0.157341	-0.292222	-0.0945705	-0.349284	-0.346073	-0.367626	-0.193989	-0.209145	-0.371461	-0.282418	-0.0257888	-0.286192	0.0106685	0.284879	-0.171978	-0.228231	-0.39774	0.0409697	0.0143773
Wansuia hejianensis	-0.661016	-0.399146	-0.0384531	-0.0243727	-0.252946	-0.0766825	-0.176202	-0.0293837	-0.0651907	-0.0437497	-0.0395999	-0.0279229	-0.0324085	-0.0240926	-0.0281636	-0.168861	0.374198	0.119745	-0.120784	-0.0419853	-0.390107	-0.0591255	-0.276626	-0.179236	-0.0886005	-0.340973	-0.298615	-0.252875	-0.275549	-0.0937989	-0.220866	-0.339648	-0.203242	-0.344013	-0.291068	-0.357347	-0.165155	-0.201341	-0.332463	-0.276655	-0.149669	-0.262469	-0.165595	0.088792	-0.173603	-0.200072	-0.378225	-0.196305	-0.0751106
Oscillospiraceae bacterium	-0.716769	-0.366215	0.0163927	0.0251958	-0.198386	0.0148929	-0.112937	0.0251192	-0.00939493	0.0192851	0.028384	0.0265352	0.0250384	0.0267187	0.0252205	-0.154191	-0.225727	-0.0285751	-0.08833	0.0299006	-0.373216	-0.012791	-0.252207	-0.157425	-0.0453934	-0.331518	-0.295017	-0.249459	-0.240409	0.2566	-0.0560444	-0.273358	-0.132472	-0.331034	-0.31281	-0.352574	-0.104662	-0.194465	-0.336044	-0.273239	0.00517334	-0.278213	-0.179948	0.433937	-0.229393	-0.229381	-0.366388	-0.0392759	0.133398
Ruminococcus sp. SR1/5	-0.514296	-0.0810719	-0.0441254	-0.0381233	-0.171958	-0.0392729	-0.12453	-0.0361417	-0.0617234	-0.0448935	-0.00370728	-0.0358191	-0.0387336	-0.0346874	-0.0375886	-0.131975	-0.227522	-0.0317544	-0.0980199	-0.0466766	-0.251619	-0.0521934	-0.209747	-0.153589	-0.0826679	-0.217005	-0.252752	-0.153017	-0.0243825	0.0105834	-0.102112	-0.110081	-0.15423	-0.265956	-0.257539	-0.249226	-0.0991807	-0.185385	-0.24991	-0.200155	0.729613	-0.196013	-0.181262	0.139124	-0.201051	-0.159119	-0.269549	-0.153095	0.0127851
Faecalibacterium prausnitzii	-0.379242	-0.209206	-0.0314069	-0.0300619	-0.135634	-0.0171206	-0.0932751	-0.026003	-0.0425167	-0.0319306	-0.0280607	-0.0257441	-0.0210238	-0.0228828	-0.0283537	-0.0969584	-0.165366	-0.032006	-0.0790415	0.0269859	-0.201609	-0.0557113	-0.151106	-0.108315	-0.0661355	-0.180959	-0.152317	-0.132209	-0.140042	0.262751	0.164023	-0.122916	-0.0462204	-0.140415	-0.166977	-0.207463	0.0117243	-0.101162	-0.182961	-0.125879	0.0266898	-0.16078	-0.119568	0.383381	-0.158845	-0.128526	-0.183335	-0.00582849	0.23664
Faecalibacterium sp. IP329	-0.467796	-0.262856	-0.0441416	-0.0444782	-0.172502	-0.044301	-0.122771	-0.0378174	-0.0588937	-0.0486323	-0.04446	-0.0370029	-0.0345677	-0.0344853	-0.0402934	-0.122219	-0.159047	-0.0424481	-0.103341	0.0105641	-0.245862	-0.075857	-0.172058	-0.135773	-0.0818021	-0.224938	-0.141022	-0.11814	-0.189245	0.145461	0.134678	-0.185319	-0.0508896	-0.194716	-0.147965	-0.227988	0.0367177	-0.106562	-0.185596	-0.159139	-0.0158943	-0.192534	-0.170031	0.317727	-0.151287	-0.167636	-0.194354	-0.0428137	0.146686
Faecalibacterium sp. I2392	-0.37287	-0.205882	-0.0344264	-0.0334882	-0.134653	-0.0209084	-0.094139	-0.029017	-0.0447189	-0.0354969	-0.031983	-0.0288209	-0.024174	-0.0254858	-0.0316827	-0.0990248	-0.153307	-0.0330013	-0.0792099	0.0258543	-0.194675	-0.0592486	-0.146686	-0.10716	-0.066891	-0.177088	-0.139465	-0.121722	-0.13965	0.252504	0.172389	-0.119499	-0.0423817	-0.135022	-0.15535	-0.198934	0.0233627	-0.0954134	-0.172471	-0.120621	0.0196295	-0.155906	-0.124883	0.375716	-0.154108	-0.130455	-0.172649	-0.0110785	0.233275
Faecalibacterium sp. I4384	-0.347005	-0.187715	-0.0225411	-0.0211808	-0.116236	-0.00554897	-0.0772547	-0.0174298	-0.031788	-0.022531	-0.0192635	-0.0173972	-0.0122084	-0.0140011	-0.0200371	-0.089835	-0.154116	-0.0276501	-0.0652651	0.0381028	-0.179123	-0.0459207	-0.134424	-0.0937566	-0.0535178	-0.163207	-0.141496	-0.122971	-0.124585	0.283199	0.175379	-0.100415	-0.0391195	-0.119444	-0.15853	-0.18926	0.0130286	-0.0902124	-0.168914	-0.110307	0.0311071	-0.143705	-0.112378	0.386503	-0.152789	-0.118886	-0.167539	-0.0024142	0.257672
Faecalibacterium sp. I4179	-0.460345	-0.258577	-0.0346525	-0.0311608	-0.165778	-0.0233754	-0.112746	-0.0281415	-0.0474798	-0.0349551	-0.0310018	-0.0277258	-0.0242196	-0.02415	-0.0306515	-0.122995	-0.184199	-0.0356741	-0.0914358	0.0209388	-0.245655	-0.061264	-0.177429	-0.126758	-0.07359	-0.222409	-0.18409	-0.156313	-0.169609	0.27345	0.129079	-0.159564	-0.0632918	-0.181624	-0.1958	-0.245201	-0.00677928	-0.120388	-0.217412	-0.157965	0.00427148	-0.191681	-0.147365	0.417061	-0.182655	-0.154303	-0.225866	-0.0159406	0.226713
[Eubacterium] siraeum	-0.580651	-0.31484	-0.0291256	-0.0230488	-0.198713	-0.0182018	-0.130636	-0.0223264	-0.050229	-0.0230952	-0.0187109	-0.0212729	-0.0203528	-0.0219608	-0.0217378	-0.114973	-0.267087	-0.031916	-0.104696	-0.00898626	-0.308868	-0.0527992	-0.229296	-0.151881	-0.081741	-0.264796	-0.246138	-0.21813	-0.199139	0.316449	0.0071652	-0.206825	-0.101965	-0.254945	-0.271078	-0.302683	-0.074615	-0.172746	-0.287799	-0.218326	-0.0301717	-0.239787	-0.143484	0.485394	-0.222936	-0.181348	-0.303157	-8.88765e-05	0.175511
Thermoclostridium stercorarium	-0.66116	-0.203112	-0.0675243	-0.0444795	-0.16958	-0.0554593	-0.124629	-0.0563212	-0.0891245	-0.0642673	-0.0653797	-0.0566718	-0.0599288	-0.0492159	-0.0606441	-0.133326	-0.186136	0.156601	-0.151985	-0.0652751	-0.183421	-0.0569883	-0.179722	-0.217294	-0.125329	-0.192529	-0.198966	-0.257222	-0.213658	0.134679	0.0770631	-0.11165	0.109175	-0.27405	-0.336193	-0.111186	-0.227171	-0.207184	-0.356962	-0.240831	-0.0994956	-0.262155	-0.104671	0.242949	-0.155072	-0.222561	-0.248059	0.102452	0.0982936
Flavonifractor plautii	-0.613747	-0.329558	0.292082	0.301809	0.0292191	0.244122	0.146708	0.300076	0.26535	0.285419	0.287324	0.30173	0.293104	0.304554	0.297105	-0.169015	-0.17963	0.007866	0.123617	0.308052	-0.344221	0.253154	-0.0697388	0.00513435	0.254064	-0.366937	-0.242836	-0.132761	-0.238123	-0.0723878	-0.211545	-0.358034	-0.0799964	-0.330007	-0.152499	-0.273754	-0.104828	-0.0250229	-0.176158	-0.191989	-0.0615243	-0.169422	-0.20428	0.0164922	-0.0639961	-0.249534	-0.293235	-0.0909439	-0.0480442
Vescimo1s coprocola	-0.480104	-0.264374	-0.0319074	-0.0306189	-0.170738	-0.0132519	-0.113659	-0.0260981	-0.0486241	-0.0260408	-0.0233956	-0.0255149	-0.0224175	-0.0255219	-0.0261854	-0.0945597	-0.24101	-0.0384507	-0.0926391	0.00215771	-0.25677	-0.060707	-0.19879	-0.130542	-0.0776419	-0.220987	-0.2032	-0.186355	-0.1672	0.359673	0.0798674	-0.156744	-0.0904081	-0.197237	-0.230906	-0.259639	-0.0331932	-0.145832	-0.242854	-0.17594	-0.0107233	-0.204044	-0.156533	0.505167	-0.217928	-0.152896	-0.249822	-0.00292138	0.231761
Clostridium botulinum	-0.0367946	-0.0165815	-0.0223198	-0.0222975	0.020846	-0.0583924	-0.103898	-0.0173417	-0.0293978	-0.0317356	-0.0344389	-0.0155846	-0.02092	-0.0146733	-0.01938	-0.0293611	0.0188614	-0.00153883	-0.0838955	-0.0500201	-0.193832	-0.0513597	-0.198929	-0.111199	-0.0646472	0.063329	-0.230024	-0.0793097	-0.176447	-0.199569	-0.172415	-0.195837	-0.232959	-0.208528	-0.203676	-0.258653	-0.206323	-0.202679	-0.238363	-0.0903629	-0.104873	-0.147454	-0.222803	0.091464	-0.262723	0.0926078	-0.227038	-0.244654	-0.203178
Clostridium sp. SY8519	-0.677742	-0.345053	-0.0418167	-0.0253682	-0.235529	-0.0384712	-0.157358	-0.033129	-0.0611061	-0.0376964	-0.0266671	-0.031986	-0.0339714	-0.0295643	-0.0339854	-0.167232	-0.314843	-0.0286994	-0.118531	-0.0298339	-0.344668	-0.0499457	-0.248127	-0.172218	-0.0922831	-0.312846	-0.27975	-0.235346	-0.202308	0.246125	-0.059412	-0.232408	-0.108438	-0.300156	-0.303554	-0.331162	-0.114462	-0.187767	-0.323886	-0.248708	0.0368538	-0.261595	-0.114377	0.423665	-0.222688	-0.219415	-0.348383	-0.00486175	0.12278
Clostridium sp. M62/1	-0.516618	-0.372141	-0.0544732	-0.0360578	-0.26334	-0.0625964	-0.176884	-0.0467584	-0.0752884	-0.0469594	-0.0488092	-0.0460333	-0.0494441	-0.0409299	-0.0489062	-0.176866	-0.300885	-0.0235076	-0.128547	-0.013958	-0.379174	-0.054295	-0.243259	-0.176437	-0.0823414	-0.339099	-0.266297	-0.193638	-0.193638	0.155342	-0.0932834	-0.282674	-0.12873	-0.251362	-0.218225	-0.353286	-0.0709564	-0.12057	-0.228429	-0.142615	-0.0808992	-0.213827	-0.105787	0.411055	-0.218032	-0.216025	-0.321081	-0.0331466	0.0784787
Clostridium sp. AWRP	-0.437047	-0.0413298	-0.0421322	-0.0286126	-0.151876	-0.0254457	-0.0960131	-0.0336855	-0.0449649	-0.0420226	0.000933318	-0.0337548	-0.0351135	-0.0301901	-0.0348568	-0.142802	-0.189905	0.0605143	-0.0120058	-0.0277511	-0.203222	-0.00422574	-0.107471	-0.0532431	-0.049846	-0.18061	-0.181073	-0.0601472	0.0574711	0.038445	-0.0523591	-0.0361497	-0.0965384	-0.169779	-0.151925	-0.186672	0.00695075	-0.0739844	-0.133382	-0.099495	0.817913	-0.0689679	-0.0629559	0.0649366	-0.134119	-0.0988226	-0.181515	-0.0762279	0.0618889
Clostridium neo1tale	-0.751715	-0.220016	0.606802	0.621773	0.326957	0.58957	0.467884	0.614702	0.574892	0.606303	0.620066	0.616059	0.613729	0.612576	0.615107	-0.0678607	-0.272637	0.140826	0.372524	0.587111	-0.267835	0.561444	0.0178371	0.18262	0.529465	-0.321348	-0.327493	-0.280697	-0.185309	0.335273	-0.150828	-0.250076	-0.0987343	-0.335408	-0.36135	-0.24341	-0.263081	-0.0578854	-0.323025	-0.272891	0.114642	-0.137442	-0.0540422	0.118946	-0.067339	-0.222542	-0.374628	0.0241576	0.287802
Clostridium saccharoperbutylacetonicum	-0.815426	-0.339844	0.00442078	0.0408329	-0.225695	-0.0179743	-0.130855	0.0151714	-0.0222977	0.00107241	0.0255006	0.0167516	0.0107431	0.0195625	0.0140026	-0.21156	-0.304681	0.194634	-0.0957658	-0.0168452	-0.371295	0.0369194	-0.262126	-0.185047	-0.0596136	-0.341424	-0.365247	-0.291883	-0.218683	-0.0336814	-0.191674	-0.287294	-0.0367698	-0.397213	-0.382944	-0.350791	-0.254332	-0.237547	-0.405128	-0.317596	0.127099	-0.297537	0.0686609	0.107684	-0.122455	-0.215785	-0.424626	0.052246	-0.0736984
Eubacterium callanderi	-0.361167	-0.244912	-0.0272711	-0.0254833	-0.157896	-0.0649504	-0.115868	-0.0211134	-0.045907	-0.0360744	-0.033885	-0.0205968	-0.0237089	-0.0159281	-0.0203823	-0.135092	0.717933	0.214477	-0.0672562	-0.0287544	-0.238042	-0.0489547	-0.181868	-0.108779	-0.0597012	-0.203354	-0.196613	-0.149759	-0.192627	-0.19501	-0.188244	-0.245157	-0.135849	-0.215406	-0.150713	-0.218917	-0.0860958	-0.140272	-0.178117	-0.175223	-0.127013	-0.158082	-0.176556	-0.06906	-0.051686	-0.0868668	-0.224757	-0.195147	-0.158114
Eubacterium sp. c-25	-0.650243	-0.34551	-0.037716	-0.00302298	-0.222815	-0.0582529	-0.153356	-0.030202	-0.0608753	-0.0384211	-0.0228425	-0.0276375	-0.0330982	-0.0283279	-0.029292	-0.169633	-0.287324	0.00734608	-0.122241	-0.0555897	-0.345346	0.00793448	-0.227703	-0.172011	-0.0934038	-0.30077	-0.317443	-0.241488	-0.201327	-0.0399729	-0.173669	-0.281239	-0.00575942	-0.313836	-0.305149	-0.327751	-0.199572	-0.191475	-0.330465	-0.245113	-0.0475559	-0.254367	0.186651	0.125301	-0.0514935	-0.197983	-0.35513	0.151505	-0.0999592
Eubacterium limosum	-0.404353	-0.25274	0.0470267	0.0496336	-0.103224	0.00678221	-0.0504171	0.0536329	0.0274022	0.0375621	0.0400259	0.0542622	0.0504567	0.0591309	0.053915	-0.141588	0.701849	0.187262	-0.0164314	0.045447	-0.246964	0.0199471	-0.158446	-0.0736827	0.0107472	-0.22321	-0.208925	-0.157443	-0.204275	-0.163824	-0.194368	-0.259224	-0.133385	-0.23354	-0.16188	-0.221457	-0.0968946	-0.127484	-0.185553	-0.186575	-0.130015	-0.155884	-0.180732	-0.0707064	-0.0410719	-0.109074	-0.24017	-0.185453	-0.130976
Clostridioides difficile	-0.804432	-0.347105	0.147834	0.167013	-0.100577	0.134973	0.00293379	0.157345	0.117961	0.149344	0.165956	0.159128	0.155824	0.158142	0.158066	-0.14203	-0.328704	0.0481329	0.00687187	0.138833	-0.386821	0.129255	-0.21173	-0.0993692	0.0801233	-0.358737	-0.350513	-0.288543	-0.227839	0.18796	-0.160498	-0.292986	-0.144951	-0.378136	-0.37586	-0.36382	-0.216232	-0.185509	-0.385379	-0.305202	0.112837	-0.268257	-0.101706	0.273898	-0.20301	-0.241151	-0.422479	-0.0413563	0.115511
Romboutsia sp. CE17	-0.411746	-0.191489	0.111226	0.117839	0.0213478	0.090588	0.0296286	0.116295	0.0877042	0.105804	0.114748	0.115856	0.113721	0.12258	0.112466	-0.108388	-0.116823	0.387338	0.0268325	0.0990696	-0.0630088	0.0725257	-0.162082	-0.0637391	0.0578033	-0.161047	-0.234203	-0.269394	-0.209222	0.0804282	-0.0619936	-0.179847	-0.154894	-0.170985	-0.299895	-0.20142	-0.234368	-0.179242	-0.292266	-0.235941	-0.062543	-0.215424	-0.219691	0.0584008	-0.195761	-0.129917	-0.32867	-0.132341	-0.0243632
Mogibacterium diversum	-0.462875	-0.133241	-0.0143371	-0.0424037	-0.160378	-0.0281357	-0.104572	-0.0165511	-0.0781056	-0.00335548	0.0110629	-0.0121129	-0.00692652	-0.0476335	0.0043624	0.271163	-0.238435	0.0264901	-0.125221	-0.0854209	-0.31643	-0.0649791	-0.234338	-0.173788	-0.0949561	-0.175576	-0.283638	-0.212977	-0.13635	-0.192423	-0.251532	-0.222881	-0.235233	-0.308231	-0.297639	-0.301647	-0.244742	-0.193277	-0.325734	-0.24586	0.363446	-0.22861	-0.158347	-0.0693994	-0.263671	-0.0872491	-0.275084	-0.258016	-0.116568
butyrate-producing bacterium SS3/4	-0.596392	-0.317507	-0.0138202	-0.00538109	-0.192523	-0.00927283	-0.121443	-0.00680885	-0.0342519	-0.00727402	-0.00185102	-0.00565117	-0.00753366	-0.00618704	-0.005911	-0.12387	-0.26731	-0.027054	-0.0913122	-0.0142301	-0.314854	-0.0348915	-0.225047	-0.142774	-0.0644629	-0.273543	-0.250299	-0.220581	-0.195892	0.275772	-0.0791191	-0.219877	-0.123208	-0.274975	-0.273917	-0.299837	-0.102481	-0.174412	-0.290965	-0.231252	-0.0310479	-0.237971	-0.153629	0.434406	-0.220878	-0.184693	-0.316533	-0.0176274	0.112049
Christensenella sp. Marseille-P3954	-0.841158	-0.384879	0.480786	0.513756	0.176254	0.432185	0.315971	0.492005	0.451883	0.469868	0.477599	0.493642	0.487836	0.499463	0.488678	-0.203877	-0.112142	0.292795	0.267209	0.466725	-0.338737	0.458898	-0.0487535	0.0896179	0.407147	-0.382279	-0.328384	-0.296939	-0.300523	0.0660988	-0.226376	-0.370299	-0.0579705	-0.393881	-0.334777	-0.290653	-0.270856	-0.0880396	-0.334718	-0.31079	-0.187898	-0.197969	-0.00392961	-0.0301498	0.0130739	-0.205494	-0.420827	0.0495629	0.0773675
uncultured Clostridia bacterium	-0.72805	-0.375798	0.0321652	0.0489491	-0.186236	0.0190971	-0.100053	0.0406697	0.00569963	0.0342497	0.0405403	0.0424167	0.0400984	0.0418176	0.0419606	-0.125191	-0.28743	0.0495477	-0.073768	0.0297623	-0.373738	0.0136142	-0.234361	-0.147193	-0.0251312	-0.329945	-0.296233	-0.261949	-0.246773	0.152819	-0.130082	-0.287933	-0.146882	-0.339742	-0.327854	-0.347551	-0.178927	-0.179239	-0.356713	-0.278215	-0.0647269	-0.265973	-0.11856	0.295714	-0.224933	-0.215767	-0.380864	-0.0632633	0.0906508
Clostridia bacterium UC5.1-1D4	-0.400785	-0.22941	-0.0254983	0.0125864	-0.139561	-0.0527963	-0.0952084	-0.0213266	-0.0392061	-0.0291588	-0.0175389	-0.0188363	-0.0244137	-0.019433	-0.0204555	-0.11704	-0.213717	-0.0262001	-0.0823457	-0.0506015	-0.207911	0.0433813	-0.118128	-0.105736	-0.0584595	-0.192715	-0.210455	-0.149584	-0.122325	-0.198048	-0.166512	-0.194886	0.0738789	-0.194675	-0.187633	-0.19411	-0.18089	-0.103606	-0.207903	-0.142339	-0.102121	-0.147157	0.336448	-0.11211	0.0774207	-0.131253	-0.222194	0.209038	-0.177165
Erysipelatoclostridium ramosum	-0.550332	-0.113917	-0.0533708	-0.0355323	-0.190157	-0.0579271	-0.139484	-0.0453415	-0.0727959	-0.0546328	-0.0116102	-0.0443707	-0.0488898	-0.0440097	-0.0457665	-0.145421	-0.2531	0.0194743	-0.108143	-0.0760825	-0.264213	-0.0321468	-0.214566	-0.164803	-0.0956047	-0.231707	-0.285811	-0.177305	-0.0324783	-0.0952542	-0.187724	-0.141325	-0.111517	-0.287101	-0.281003	-0.264302	-0.162428	-0.197949	-0.274382	-0.216305	0.667862	-0.206664	-0.0458358	0.0338757	-0.137884	-0.159651	-0.297553	-0.0751248	-0.0926684
[Clostridium] innocuum	-0.459039	-0.271479	-0.0414389	-0.00390111	-0.17762	-0.0745758	-0.128181	-0.0361564	-0.0584309	-0.0460109	-0.0336954	-0.033683	-0.0399901	-0.0332442	-0.03502	-0.141931	-0.0256901	0.00447738	-0.10181	-0.0665903	-0.257152	0.0230146	-0.162065	-0.131061	-0.0797307	-0.23077	-0.259251	-0.18216	-0.154036	-0.221524	-0.208762	-0.239262	0.0336987	-0.232092	-0.224651	-0.242654	-0.200782	-0.137736	-0.248206	-0.1739	-0.113368	-0.178069	0.294003	-0.109434	0.0543481	-0.150032	-0.270778	0.155896	-0.201578
Erysipelotrichaceae bacterium 66202529	-0.352008	-0.17989	-0.0339056	-0.0245888	-0.142275	-0.055273	-0.101701	-0.0275763	-0.0483092	-0.0393741	-0.0342252	-0.0286828	-0.0275441	-0.0258429	-0.0276512	-0.0999546	0.0626801	0.985858	-0.00327063	-0.0364181	-0.182072	-0.0337989	-0.143498	-0.0847104	-0.0564383	-0.141812	-0.179441	-0.148501	-0.129138	-0.109438	-0.155262	-0.187445	-0.0792015	-0.171948	-0.175061	-0.187912	-0.157885	-0.152418	-0.195022	-0.155491	-0.0663305	-0.122802	-0.108731	-0.0212611	-0.0733482	0.0604597	-0.211167	-0.139441	-0.0982327
Longicate1 caecimuris	-0.61405	-0.264605	0.212241	0.219707	0.0187722	0.227411	0.10769	0.220169	0.190983	0.216077	0.223442	0.220604	0.223962	0.222212	0.218812	-0.12236	-0.246016	0.121853	0.0898011	0.234398	-0.252197	0.17648	-0.134662	-0.0137034	0.147779	-0.248842	-0.261396	-0.24853	-0.187865	0.438605	0.029848	-0.183168	-0.0674638	-0.253468	-0.297658	-0.263975	-0.112072	-0.128648	-0.279592	-0.226953	0.0400647	-0.194355	-0.149373	0.457062	-0.161072	-0.146271	-0.312811	0.0481364	0.290715
Faecalitalea cylindroides	-0.570699	-0.160265	0.738474	0.739333	0.495494	0.732861	0.621351	0.743809	0.712416	0.740752	0.740464	0.744621	0.743436	0.741124	0.743493	-0.031053	-0.136197	0.0345601	0.488731	0.725386	-0.169858	0.665086	0.110011	0.29507	0.663319	-0.232876	-0.251023	-0.237389	-0.184919	0.55247	-0.0603892	-0.196063	-0.0616012	-0.244281	-0.283062	-0.149597	-0.184072	0.00805816	-0.22628	-0.210289	-0.0902827	-0.069154	-0.120184	0.253462	-0.0289742	-0.179375	-0.286765	0.0770681	0.393866
Parvimo1s micra	-0.398372	-0.0549494	-0.0146815	-0.0468975	-0.139471	-0.0238132	-0.0914575	-0.0151806	-0.074082	-0.00761763	0.0145444	-0.012607	-0.00529071	-0.0446329	0.00325075	0.220581	-0.104127	0.684307	-0.0614418	-0.0717624	-0.269168	-0.059056	-0.220141	-0.146078	-0.090801	-0.127739	-0.292643	-0.194118	-0.0928478	-0.216086	-0.223856	-0.201153	-0.190541	-0.275561	-0.277297	-0.278103	-0.227096	-0.225941	-0.291123	-0.224927	0.481111	-0.195289	-0.209105	-0.097273	-0.207162	0.0380449	-0.244917	-0.271463	-0.157465
Nocardia gipuzkoensis	0.468948	0.737854	-0.105382	-0.127524	0.407836	-0.0352656	0.147561	-0.107938	-0.0902547	-0.103555	-0.130207	-0.111916	-0.0938652	-0.112043	-0.111071	0.396957	0.356614	-0.159615	-0.0762994	-0.139393	0.809328	-0.0883913	0.147282	0.0601077	-0.102838	0.758317	0.487197	0.133769	0.24462	0.09059	0.734191	0.715635	0.630177	0.276998	0.0823047	0.692623	0.0129029	0.0548487	0.0633941	0.0241157	-0.0870805	0.0937923	-0.0886598	-0.281797	-0.0190303	0.162904	0.564091	0.137293	0.187225
Lawsonella clevelandensis	-0.318522	-0.141519	-0.0334968	-0.0245875	-0.130076	-0.0494833	-0.0931637	-0.0272881	-0.0446821	-0.0378771	-0.0288112	-0.0284359	-0.0272719	-0.0258066	-0.027577	-0.0941202	-0.0208149	0.984329	0.00565063	-0.0337285	-0.16408	-0.0309371	-0.123153	-0.0734289	-0.0502222	-0.127458	-0.168673	-0.129483	-0.0898446	-0.100165	-0.142001	-0.160946	-0.0828113	-0.153039	-0.158802	-0.174847	-0.143171	-0.137531	-0.172576	-0.134292	0.0365965	-0.101517	-0.107822	-0.0214363	-0.0767214	0.0687314	-0.186509	-0.139113	-0.0768928
Arthrobacter sp. KBS0702	0.31862	0.0730451	-0.0903352	-0.0727628	0.0686975	-0.0798536	0.0602318	-0.0853084	-0.0542068	-0.091561	-0.0982569	-0.0909238	-0.0819767	-0.0762383	-0.0951966	-0.0272691	0.0964169	-0.0857768	-0.0262226	-0.024361	0.174114	-0.0879448	0.4466	0.156748	0.026119	0.0791226	0.566586	0.364551	0.598919	0.212136	0.0718087	0.361237	0.0962877	0.263409	0.617	0.352512	0.617237	0.190238	0.5333	0.251426	0.035209	0.331931	0.260295	0.0355271	0.46346	0.167895	0.648135	0.442927	0.362988
Streptomyces sp. GMY02	0.295794	0.347484	-0.0897518	-0.0631393	0.25305	0.00670772	0.0773532	-0.0872818	0.0128118	-0.0731677	-0.0886133	-0.0865185	-0.0799523	-0.0768213	-0.0814857	0.118463	0.350199	-0.112779	0.410871	-0.098129	0.491519	0.205738	0.392941	0.556132	0.0361156	0.391076	0.474046	0.443773	0.222825	0.411578	0.498453	0.536581	0.442665	0.50817	0.398593	0.493237	0.389708	0.637108	0.375882	0.483514	0.0168126	0.598397	0.202196	-0.217771	-0.0971303	0.00306404	0.482611	0.312286	0.109417
Streptomyces sp. ICC1	-0.00474143	0.0158463	-0.0215544	-0.0226956	0.0539821	-0.0531961	-0.0881395	-0.0181733	-0.0337366	-0.0310486	-0.0309703	-0.0170789	-0.021721	-0.0162329	-0.0196927	-0.00408293	0.0426829	-0.00505671	-0.0729958	-0.0444605	-0.17983	-0.0461186	-0.154611	-0.0939626	-0.0524628	0.142292	-0.202391	-0.155604	-0.147189	-0.186951	-0.166677	-0.177273	-0.17268	-0.167419	-0.17759	-0.184778	-0.19437	-0.155007	-0.202473	-0.154245	-0.0765509	-0.15713	-0.176733	-0.117807	-0.199478	0.169541	-0.201725	-0.214208	-0.181344
Actinomyces graevenitzii	-0.322457	0.0320148	-0.032867	-0.0289189	-0.109296	-0.0290994	-0.0773254	-0.0273076	-0.0440214	-0.0352646	0.00811857	-0.0274285	-0.0300934	-0.0266696	-0.0287695	-0.0931306	-0.171372	-0.00156113	-0.0585153	-0.0406061	-0.147948	-0.0304143	-0.126531	-0.100521	-0.0532821	-0.136634	-0.177843	-0.0784337	0.0633287	-0.0964856	-0.10964	-0.035195	-0.120605	-0.173749	-0.166263	-0.149974	-0.0718039	-0.125532	-0.148481	-0.122712	0.817966	-0.109806	-0.117796	-0.0316216	-0.114843	-0.0962926	-0.166871	-0.14493	-0.0391179
Actinomyces 1eslundii	-0.311057	0.0368326	-0.0328488	-0.0283245	-0.106656	-0.0294868	-0.0743011	-0.0272944	-0.0424863	-0.0358003	0.00777164	-0.0275021	-0.0303736	-0.0259674	-0.029238	-0.0994388	-0.16226	-0.00995436	-0.0559903	-0.0389615	-0.138692	-0.0289638	-0.117775	-0.0959344	-0.050526	-0.134792	-0.167293	-0.0686812	0.070281	-0.104408	-0.105326	-0.0288693	-0.113588	-0.165541	-0.153747	-0.139635	-0.0623031	-0.117628	-0.136069	-0.115332	0.820681	-0.102035	-0.111733	-0.0435106	-0.102985	-0.0972878	-0.15585	-0.139952	-0.0416848
Actinomyces sp. oral taxon 414	-0.303098	0.0447756	-0.0325657	-0.0283032	-0.104127	-0.029304	-0.0708826	-0.0269319	-0.0409024	-0.0351303	0.00799054	-0.0272257	-0.0302046	-0.0257219	-0.0291819	-0.0992808	-0.162932	-0.0271986	-0.0562146	-0.0375431	-0.134701	-0.0296462	-0.107457	-0.0878228	-0.0466272	-0.13564	-0.158038	-0.0521124	0.0962969	-0.103365	-0.10312	-0.0225774	-0.112294	-0.158501	-0.138629	-0.13672	-0.0434125	-0.109761	-0.12492	-0.112791	0.825206	-0.093237	-0.102834	-0.0425033	-0.0908996	-0.103028	-0.138812	-0.132877	-0.0324381
Actinomyces pacaensis	-0.378846	-0.0046479	-0.0367801	-0.0332489	-0.132045	-0.0298317	-0.0909311	-0.0308082	-0.0501045	-0.0371135	0.00566892	-0.0307945	-0.03366	-0.0306746	-0.031819	-0.102556	-0.206433	-0.0254357	-0.0697648	-0.0465212	-0.177813	-0.0377558	-0.149531	-0.114547	-0.0627889	-0.163829	-0.198666	-0.100083	0.0436623	-0.0380269	-0.116649	-0.0540936	-0.13089	-0.197813	-0.190037	-0.177622	-0.0731691	-0.142958	-0.172779	-0.144481	0.797097	-0.13379	-0.137335	0.0456763	-0.138493	-0.116643	-0.194736	-0.133368	-0.0216756
Actinomyces oris	-0.627069	-0.188133	-0.0565323	-0.0457637	-0.221938	-0.0661944	-0.158902	-0.0477169	-0.0794727	-0.0586218	-0.023293	-0.0470681	-0.0510557	-0.0464316	-0.0481058	-0.133484	-0.284427	0.0407597	-0.123319	-0.0691001	-0.322232	-0.0678432	-0.230111	-0.184969	-0.0949621	-0.273139	-0.2673	-0.186807	-0.0808656	-0.0548755	-0.186223	-0.188517	-0.186758	-0.317219	-0.272419	-0.292361	-0.137704	-0.19361	-0.290529	-0.247458	0.574919	-0.23024	-0.186559	0.0895261	-0.22181	-0.166175	-0.307037	-0.176694	-0.0296669
Schaalia odontolytica	-0.473389	-0.0662696	-0.0391754	-0.0392726	-0.164859	-0.0336883	-0.113046	-0.0334367	-0.0626001	-0.0363661	0.00250836	-0.0326515	-0.0347909	-0.0378333	-0.0310685	-0.0642522	-0.253791	-0.0235087	-0.0935864	-0.0604003	-0.240188	-0.0507436	-0.196431	-0.145279	-0.080222	-0.199761	-0.243606	-0.149138	-0.0100932	-0.0110319	-0.149696	-0.105829	-0.163889	-0.253599	-0.245527	-0.235346	-0.113263	-0.177787	-0.237	-0.193488	0.720723	-0.182629	-0.167384	0.101705	-0.19367	-0.136519	-0.25022	-0.152751	-0.0206813
Schaalia cardiffensis	-0.298134	0.0478096	-0.0296865	-0.0253884	-0.102075	-0.023109	-0.0647213	-0.0244763	-0.0382298	-0.0318639	0.0116141	-0.0247651	-0.0273207	-0.0233076	-0.0263584	-0.0955349	-0.164179	-0.0207121	-0.0496035	-0.0347279	-0.119962	-0.024014	-0.10636	-0.0873171	-0.0455197	-0.132463	-0.15244	-0.0595159	0.0824689	-0.0848615	-0.0873921	-0.00905811	-0.098218	-0.151729	-0.143049	-0.122007	-0.0509208	-0.107499	-0.121994	-0.103838	0.828896	-0.0905591	-0.0999779	-0.0351284	-0.0922687	-0.103047	-0.13972	-0.123012	-0.0269187
Pauljensenia hongkongensis	-0.302559	0.0418054	-0.0325235	-0.0282402	-0.103487	-0.0283433	-0.0725472	-0.027045	-0.0417093	-0.0351404	0.00836809	-0.0272679	-0.0301148	-0.025794	-0.0290215	-0.0978728	-0.162843	-0.0232717	-0.055514	-0.0384304	-0.135803	-0.0286954	-0.114826	-0.09322	-0.049563	-0.131376	-0.165953	-0.0654624	0.0772545	-0.0968147	-0.103324	-0.0248213	-0.113347	-0.161013	-0.151054	-0.13786	-0.058415	-0.11581	-0.132799	-0.11284	0.823135	-0.0991803	-0.109027	-0.0374144	-0.101383	-0.0972847	-0.151802	-0.136558	-0.0366499
Bifidobacterium longum	-0.506592	-0.285876	-0.0523307	-0.0464258	-0.209012	-0.0848967	-0.151589	-0.0443221	-0.0730453	-0.0607755	-0.056317	-0.044676	-0.0456463	-0.0418608	-0.0446303	-0.145353	0.101451	0.878781	-0.0518799	-0.051823	-0.271239	-0.0697738	-0.204824	-0.13691	-0.0872105	-0.226684	-0.197921	-0.169177	-0.213937	-0.151513	-0.159355	-0.28117	-0.111425	-0.257067	-0.189675	-0.25341	-0.117855	-0.182134	-0.233741	-0.218131	-0.136276	-0.192152	-0.196773	0.0164149	-0.10541	-0.0166276	-0.2612	-0.178836	-0.140335
Arachnia propionica	-0.288511	0.0478192	-0.0311775	-0.0271095	-0.0992761	-0.0263693	-0.0685624	-0.0259378	-0.0400106	-0.0338596	0.00964784	-0.0261787	-0.028898	-0.0247309	-0.0278585	-0.0951393	-0.158854	-0.0230256	-0.0520405	-0.0370139	-0.127456	-0.0264695	-0.110022	-0.0898904	-0.0475902	-0.125619	-0.159926	-0.0623368	0.0784739	-0.0984191	-0.0990955	-0.0187526	-0.109126	-0.153603	-0.145347	-0.129569	-0.0565213	-0.111342	-0.12527	-0.105577	0.826273	-0.0932829	-0.104583	-0.0438485	-0.0965438	-0.092342	-0.145479	-0.133155	-0.0380542
Eggerthella lenta	-0.679651	-0.363143	0.0353295	0.0713227	-0.177227	-0.00947415	-0.095455	0.0440201	0.00828432	0.0275008	0.0429068	0.0463311	0.0398829	0.0472925	0.0448212	-0.190499	-0.0259343	0.33545	-0.0526104	0.00942552	-0.355252	0.0778578	-0.206026	-0.136534	-0.0213385	-0.32219	-0.338721	-0.250233	-0.235433	-0.232339	-0.271422	-0.34784	-0.0160596	-0.344782	-0.300365	-0.331746	-0.24763	-0.187951	-0.330728	-0.266993	-0.108115	-0.242484	0.161802	-0.0982721	0.0122678	-0.160365	-0.373936	0.0747852	-0.214286
Adlercreutzia hattorii	-0.682656	-0.410221	-0.0694583	-0.0585527	-0.276025	-0.111746	-0.206002	-0.061071	-0.0965434	-0.0760859	-0.0733628	-0.0588825	-0.0649616	-0.0571942	-0.0601777	-0.153957	0.0969767	-0.0622881	-0.166229	-0.0755323	-0.391715	-0.0990233	-0.271638	-0.209442	-0.116978	-0.340289	-0.242702	-0.20919	-0.293318	-0.150279	-0.192886	-0.34942	-0.181508	-0.360091	-0.245724	-0.338412	-0.120684	-0.179181	-0.310251	-0.283811	-0.170986	-0.282543	-0.198347	0.0771556	-0.191131	-0.236234	-0.344584	-0.193588	-0.113858
Adlercreutzia equolifaciens	-0.497378	-0.291467	-0.0475143	-0.0314733	-0.192535	-0.0795788	-0.144544	-0.0418227	-0.0663912	-0.0507014	-0.0503858	-0.0400383	-0.0437864	-0.03953	-0.0402625	-0.0706222	-0.104853	-0.0434424	-0.118251	-0.0596988	-0.279684	-0.0592223	-0.184553	-0.148196	-0.0763375	-0.237468	-0.181131	-0.1705	-0.198898	-0.128846	-0.172314	-0.236427	-0.156183	-0.255306	-0.210249	-0.246327	-0.161225	-0.114798	-0.256157	-0.203509	-0.131232	-0.193752	-0.0834635	-0.00225904	-0.174896	-0.163426	-0.267404	-0.160839	-0.0496026
Collinsella aerofaciens	-0.656333	-0.276129	0.536311	0.540497	0.276746	0.487805	0.391931	0.543565	0.505842	0.526833	0.526318	0.545341	0.539291	0.545192	0.543213	-0.0914212	0.219863	-0.0207778	0.304119	0.520649	-0.275999	0.464701	0.00248865	0.146322	0.470396	-0.308141	-0.258399	-0.217267	-0.274855	0.0922618	-0.194524	-0.32457	-0.123252	-0.333797	-0.25162	-0.218888	-0.190017	-0.0350186	-0.253842	-0.264633	-0.18545	-0.146512	-0.188956	-0.045631	-0.0330436	-0.229396	-0.322605	-0.111042	0.10702
Lancefieldella parvula	-0.477836	-0.0605535	0.0153478	0.0196462	-0.110977	0.00538033	-0.0615988	0.0208211	-0.0101997	0.0143494	0.0490607	0.0220751	0.0198294	0.0162211	0.0239119	-0.0259199	-0.228395	0.00210395	-0.0585411	-0.0110113	-0.230715	0.00422973	-0.167368	-0.119464	-0.0246276	-0.192039	-0.236193	-0.152781	-0.0349741	-0.131082	-0.170868	-0.120653	-0.163536	-0.265097	-0.253834	-0.220134	-0.173527	-0.150688	-0.253694	-0.198458	0.635708	-0.170045	-0.129629	-0.0665656	-0.183503	-0.137874	-0.253485	-0.198037	-0.0413545
Parolsenella massiliensis	-0.598439	-0.262783	0.436947	0.443345	0.19941	0.38977	0.307985	0.445142	0.415754	0.424101	0.429256	0.446192	0.438452	0.451976	0.441506	-0.176125	0.381459	0.0200356	0.251254	0.433277	-0.245831	0.383427	-0.0125969	0.114541	0.383622	-0.304432	-0.212486	-0.165766	-0.241633	0.0244058	-0.160573	-0.301262	-0.0812133	-0.299594	-0.182769	-0.188134	-0.0986648	-0.0395215	-0.187499	-0.227953	-0.126957	-0.130476	-0.174841	-0.056105	0.0310144	-0.225833	-0.27159	-0.0764307	0.0254369
Prochlorococcus marinus	0.235032	-0.0946742	-0.11437	-0.0777208	0.0120497	-0.0547003	-0.026345	-0.112424	0.020498	-0.094526	-0.0579325	-0.110805	-0.112424	-0.100437	-0.10749	-0.0800932	0.0954239	-0.0759899	0.445677	-0.0425149	0.0460316	0.162551	0.549054	0.550137	0.0745183	-0.114747	0.436595	0.806384	0.450292	0.30325	-0.0280195	0.114497	-0.0419875	0.689902	0.706209	0.161877	0.635011	0.754628	0.719384	0.783517	0.0494799	0.781283	0.56115	0.28233	0.402243	-0.189103	0.489996	0.370531	0.208646
Legionella pneumophila	0.419502	0.755089	-0.0730694	-0.0872288	0.40811	0.00842131	0.206075	-0.0760493	-0.0577115	-0.0703806	-0.101789	-0.0810058	-0.0678617	-0.0727197	-0.0854134	0.326416	0.344166	-0.135232	-0.097957	-0.0862816	0.89944	-0.07415	0.133973	0.0112178	-0.0596196	0.707158	0.535305	0.119497	0.200435	0.135314	0.870858	0.806352	0.741446	0.217065	0.0336717	0.793621	-0.0401208	0.0305558	0.0604423	0.0533243	-0.0712468	0.0737847	-0.0152246	-0.194947	0.0555646	0.0695776	0.578667	0.204163	0.308341
Legionella israelensis	0.44984	0.712666	-0.126655	-0.126083	0.36566	-0.0404243	0.164649	-0.125298	-0.0983951	-0.127618	-0.159531	-0.131935	-0.118722	-0.112875	-0.139674	0.224473	0.347596	-0.148519	-0.108577	-0.12667	0.890424	-0.102299	0.213186	0.0211332	-0.107592	0.715937	0.617014	0.153535	0.256106	0.161916	0.868932	0.807364	0.71949	0.270744	0.139355	0.869015	0.0504664	0.0657793	0.151726	0.132978	-0.0529875	0.143556	-0.00343443	-0.188517	0.110056	0.118038	0.62378	0.29404	0.307168
Legionella antarctica	0.545214	0.694357	-0.155358	-0.147876	0.333876	-0.0569472	0.148722	-0.153705	-0.0899708	-0.144313	-0.166333	-0.158288	-0.150698	-0.141852	-0.163379	0.189528	0.361894	-0.175445	0.0396169	-0.131338	0.8048	-0.0467459	0.391173	0.210133	-0.0740064	0.574388	0.731075	0.423637	0.451712	0.193275	0.766372	0.810867	0.602283	0.401609	0.37522	0.84466	0.28248	0.285269	0.412452	0.37435	-0.0196158	0.41431	0.181573	-0.0932777	0.25777	-0.0025295	0.767309	0.412403	0.346501
Escherichia coli	-0.284966	-0.000501102	-0.0422745	-0.0407805	-0.0668634	-0.043949	-0.0724257	-0.0385688	-0.0564293	-0.0476683	-0.00855906	-0.038394	-0.0386919	-0.0344533	-0.0413293	-0.0833682	-0.143798	-0.0477396	-0.0814371	-0.0512428	-0.0118538	-0.050663	-0.134059	-0.112376	-0.0716916	-0.111366	-0.138616	-0.106906	0.0102586	-0.131211	-0.0514215	-0.0259469	-0.108922	-0.12803	-0.17006	-0.120906	-0.103253	-0.123883	-0.149266	-0.137917	0.666406	-0.143314	-0.169945	-0.0876049	-0.123934	-0.155865	-0.177085	-0.160461	-0.109004
Klebsiella quasipneumoniae	-0.0294393	-0.101922	-0.00376692	0.0147094	-0.0972514	-0.0130532	-0.0560093	-0.000527167	0.0105217	0.00563111	0.0129402	-0.000398483	-0.00670061	0.00999007	-0.00334416	-0.137127	-0.142893	-0.0678926	0.0658234	0.0386736	-0.164447	0.0581194	0.00661988	0.0557457	0.047339	-0.221766	-0.0449575	0.0704005	0.0741747	-0.0398465	-0.177014	-0.0917214	-0.193218	0.0110228	0.0822695	-0.158598	0.0742383	0.146227	0.116219	0.168611	0.253471	0.112802	-0.0567219	0.0532183	-0.101233	-0.169276	-0.0774136	-0.0960086	-0.0567771
Klebsiella pneumoniae	0.0318023	-0.0881644	-0.0310709	-0.0189887	-0.126242	-0.0514002	-0.0864369	-0.0286594	-0.0333509	-0.0247447	-0.0343256	-0.0290721	-0.0351051	-0.0202045	-0.0332228	-0.104972	-0.1361	-0.0444628	-0.0516602	-0.00183217	-0.151722	-0.0210556	-0.091252	-0.0731997	-0.0101729	-0.168941	-0.0908339	-0.0146988	-0.013146	-0.113768	-0.154469	-0.103197	-0.169313	-0.0747137	-0.0103761	-0.176968	-0.0305503	0.00625481	0.00445769	0.0815018	0.0191534	-0.00918924	-0.112643	0.0854218	-0.159686	-0.100483	-0.111606	-0.138715	-0.0790598
Enterobacter asburiae	-0.23576	0.00542222	0.0457677	0.0463935	0.0620934	0.0399966	0.0252883	0.0475586	0.0281991	0.0374792	0.0622715	0.047386	0.0477177	0.0552897	0.0422452	-0.0693626	-0.101791	-0.059051	-0.0375635	0.0343253	0.123673	0.0193637	-0.116963	-0.0807833	0.00524267	-0.0422189	-0.122983	-0.171851	-0.0803888	-0.0515671	0.0331635	0.00169147	-0.0374811	-0.0965893	-0.214971	-0.0608677	-0.18079	-0.130556	-0.182489	-0.173736	0.349582	-0.176101	-0.204582	-0.0966144	-0.13091	-0.16567	-0.192079	-0.118698	-0.0975151
Cedecea neteri	-0.192731	0.0911221	-0.0606752	-0.0614498	0.00942421	-0.0626357	-0.0453284	-0.0586845	-0.0754837	-0.0681548	-0.0437595	-0.0596094	-0.0589739	-0.051142	-0.0654731	-0.0461935	-0.0560976	-0.0443504	-0.124531	-0.0722372	0.189976	-0.0779722	-0.134721	-0.133119	-0.0852143	0.0354229	-0.0360447	-0.123421	-0.0219584	-0.133358	0.129271	0.0818523	0.0298935	-0.0952688	-0.187214	0.0170514	-0.106184	-0.145097	-0.166702	-0.173659	0.415229	-0.174884	-0.179119	-0.161722	-0.126326	-0.141918	-0.101289	-0.147548	-0.0956148
Salmonella enterica	-0.188894	-0.0281851	-0.0030058	-0.0011079	0.0313173	-0.0116454	-0.014359	-0.00151409	-0.019733	-0.00956396	0.00904098	-0.00134198	0.00124415	0.00619966	-0.00553694	-0.0465989	-0.0891575	-0.0492036	-0.0678568	-0.0136611	0.129089	-0.0240977	-0.109335	-0.0959367	-0.0408911	-0.0430546	-0.0930068	-0.154716	-0.0764168	-0.0963869	0.0209696	-0.0111498	-0.0461596	-0.0554746	-0.183991	-0.0600269	-0.178075	-0.108023	-0.160125	-0.146815	0.23463	-0.163544	-0.18776	-0.103444	-0.12779	-0.166731	-0.167357	-0.134021	-0.12419
Lelliottia amnige1	-0.256103	-0.0467612	-0.0129045	-0.0103348	-0.0190649	-0.0200467	-0.0443102	-0.0101893	-0.0258333	-0.0184809	0.0107739	-0.00983133	-0.010608	-0.00367669	-0.0135382	-0.0838001	-0.110172	-0.0406472	-0.0524969	-0.0230856	0.0383534	-0.0219699	-0.121009	-0.0815697	-0.0417815	-0.10614	-0.127343	-0.127526	-0.0459168	-0.100778	-0.0366295	-0.0495856	-0.111958	-0.0936151	-0.170688	-0.115693	-0.123159	-0.0981272	-0.151207	-0.134003	0.4386	-0.1428	-0.176556	-0.0969733	-0.133836	-0.17983	-0.193563	-0.146704	-0.128241
Yersinia frederiksenii	-0.639054	-0.311018	0.174976	0.184561	-0.0316185	0.178093	0.0601199	0.183446	0.156863	0.178421	0.182976	0.183893	0.182725	0.18825	0.180812	-0.155354	-0.15016	-0.0356427	0.0524587	0.198826	-0.286026	0.136042	-0.141217	-0.0402155	0.125832	-0.295551	-0.278355	-0.225779	-0.211022	0.410016	-0.0300149	-0.207263	-0.0841639	-0.271036	-0.290859	-0.283796	-0.105449	-0.131648	-0.290167	-0.234575	-0.0372189	-0.21518	-0.173303	0.450174	-0.181049	-0.218108	-0.330146	-0.0125305	0.258887
Pseudomo1s fluorescens	0.00867929	0.0177103	-0.0289785	-0.030672	0.0558174	-0.0601003	-0.0900227	-0.0256963	-0.040077	-0.0376058	-0.0383206	-0.0245292	-0.0287979	-0.0243218	-0.0268194	0.00508503	0.0595345	-0.00914015	-0.0734986	-0.0519702	-0.170671	-0.0503826	-0.144241	-0.0899909	-0.0579113	0.136525	-0.185345	-0.135532	-0.136045	-0.187461	-0.160146	-0.167806	-0.162737	-0.155366	-0.161816	-0.175511	-0.180848	-0.147467	-0.189051	-0.141119	-0.0998259	-0.145644	-0.166439	-0.109386	-0.185224	0.150264	-0.180216	-0.205931	-0.181809
Pseudomo1s frederiksbergensis	0.0610637	0.332244	-0.019986	-0.0161691	-0.00881887	0.0241608	0.0115525	-0.0138071	-0.0328363	-0.0278431	-0.037677	-0.0191324	-0.0173352	-0.00801976	-0.022279	-0.0448015	-0.0121528	0.0184845	-0.0628263	-0.0226442	0.121615	-0.0463832	-0.0694087	-0.091902	-0.0493837	0.675847	-0.0119169	-0.143347	-0.10872	0.096871	0.284988	0.195327	0.313748	-0.0982949	-0.0675695	0.250331	-0.000283168	-0.104804	-0.0323087	-0.124857	0.31302	-0.0902793	-0.106477	-0.0790078	-0.127887	0.831529	-0.0170441	0.10422	0.112195
Pseudomo1s aeruginosa	-0.50458	-0.242446	-0.00134791	0.00103719	-0.157026	-0.0411156	-0.0940579	0.00605292	-0.0174706	-0.0123482	-0.00196813	0.00752304	0.000276085	0.010276	0.00307339	-0.169937	-0.0815023	-0.0418924	-0.0756386	0.0179114	-0.266765	-0.0277087	-0.102474	-0.109965	-0.0217809	-0.270864	-0.139661	-0.0264821	-0.155682	-0.24612	-0.133565	-0.258259	-0.0188516	-0.263511	-0.0584481	-0.199153	0.000505739	-0.0642432	-0.120992	-0.181702	0.0776241	-0.177581	-0.215253	-0.0526081	-0.0260994	-0.198681	-0.168068	-0.0996526	-0.176765
Pseudomo1s putida	-0.179981	-0.045534	0.142465	0.143634	0.151864	0.104967	0.0444184	0.148365	0.125479	0.131386	0.134297	0.149611	0.143777	0.151683	0.145607	-0.0456067	0.0528515	-0.000800788	0.0334794	0.119583	-0.232008	0.103301	-0.128016	-0.0360133	0.0948528	0.0490386	-0.259863	-0.195745	-0.194651	-0.100618	-0.188657	-0.238579	-0.175755	-0.237469	-0.232548	-0.223138	-0.223198	-0.152398	-0.25073	-0.209512	-0.0853448	-0.179459	-0.215168	-0.0789132	-0.183354	0.0900171	-0.266836	-0.197115	-0.114429
Ve1torbacter cucullus	0.297976	0.0414406	-0.100817	-0.0831005	0.0265997	-0.0841858	-0.000333344	-0.0956222	-0.0109695	-0.0855195	-0.0849597	-0.0968125	-0.0971705	-0.0899218	-0.0989595	-0.0357115	0.128407	-0.094818	0.178738	-0.0455454	0.154231	0.00829247	0.380978	0.370173	0.0601139	-0.0551987	0.384701	0.877615	0.556239	0.117632	0.00397341	0.16198	-0.00935186	0.45676	0.584285	0.0954277	0.67136	0.409263	0.535974	0.595955	0.0360582	0.566921	0.380037	0.523402	0.323031	-0.134915	0.51964	0.166086	0.230474
Acinetobacter baumannii	-0.320029	-0.12954	0.163787	0.173885	0.115307	0.114773	0.0444018	0.170741	0.135412	0.149481	0.153236	0.172383	0.164999	0.178564	0.166214	-0.0973836	-0.136813	0.00792081	0.00629684	0.126672	-0.162572	0.109925	-0.19176	-0.0888339	0.0931717	-0.0642564	-0.333768	-0.334174	-0.283732	-0.132839	-0.191383	-0.230523	-0.210881	-0.30018	-0.354213	-0.292834	-0.377227	-0.21648	-0.370046	-0.325735	-0.145615	-0.287471	-0.262645	-0.159742	-0.273219	-0.0536202	-0.412835	-0.221099	-0.182839
Methylomagnum ishizawai	0.145986	0.403262	0.0122658	-0.00133118	0.0668558	0.0506808	0.0386976	0.0152198	-0.0149343	0.00986409	-0.00399953	0.0124702	0.0150685	0.00752948	0.0162759	0.124354	0.0308353	0.0217184	-0.0417767	-0.0181149	0.0852291	-0.0305157	-0.0903794	-0.064703	-0.0309751	0.743388	-0.0527054	-0.136356	-0.127632	-0.0218132	0.216867	0.162808	0.254731	-0.123707	-0.0918674	0.195291	-0.0641541	-0.108066	-0.0538633	-0.131509	0.316649	-0.0913908	-0.120842	-0.176068	-0.163421	0.869721	-0.0277745	0.0154777	0.0208989
Polynucleobacter sp. MG-Unter2-18	0.389062	0.638291	-0.0832847	-0.106854	0.347748	-0.0151723	0.142692	-0.0860965	-0.0975457	-0.0864772	-0.112177	-0.0904267	-0.0716223	-0.0879837	-0.0904113	0.362012	0.285497	-0.12494	-0.148596	-0.12847	0.810566	-0.106782	0.0296635	-0.0953989	-0.137208	0.766124	0.374679	-0.0689707	0.0172371	0.0506894	0.75505	0.6368	0.613266	0.188838	-0.0787067	0.690652	-0.156608	-0.0868969	-0.0549103	-0.0473674	-0.0493975	-0.0524292	-0.187356	-0.271505	-0.0826914	0.233061	0.374313	0.0791868	0.123234
Burkholderia pseudomallei	-0.295477	0.0589462	0.654806	0.662179	0.608145	0.651353	0.649116	0.660501	0.657812	0.646097	0.633922	0.658967	0.655223	0.67076	0.649577	-0.0467155	0.0871407	-0.0424255	0.451355	0.64357	0.172186	0.592797	0.214288	0.34294	0.629081	-0.0164408	0.152898	-0.0582769	-0.0764587	0.259533	0.179983	0.0407792	0.0991519	-0.0995378	-0.0404261	0.20161	-0.020338	0.150474	-0.0120795	-0.0776155	-0.121564	0.0692381	-0.0689732	-0.127134	0.140136	-0.134686	0.0410702	0.104258	0.320543
Ralstonia sola1cearum	-0.0793514	0.0236651	0.0402552	0.000227244	0.0395748	0.0499088	0.032904	0.0375497	-0.00761229	0.0479961	0.0301478	0.0404642	0.0451774	0.0143789	0.0557366	0.280295	0.63002	-0.0666633	-0.0200946	-0.0168503	-0.017797	-0.00720902	-0.0799167	-0.023253	-0.0285398	0.0572794	-0.127036	-0.152021	-0.169267	-0.168686	0.00608064	-0.048265	-0.00107879	-0.0478036	-0.138433	-0.00904817	-0.162972	-0.0393466	-0.146836	-0.10735	-0.0578923	-0.0807967	-0.199158	-0.231817	-0.0583973	0.0732206	-0.0365213	-0.040149	-0.0726009
Ralstonia insidiosa	-0.160926	-0.198018	-0.024789	-0.0169912	-0.151425	-0.0501423	-0.0986575	-0.019105	-0.0374542	-0.0308293	-0.0326488	-0.0193627	-0.0222914	-0.0115853	-0.0192412	-0.158376	0.605666	0.142183	-0.0492126	-0.0246261	-0.215113	-0.0413553	-0.130354	-0.0749987	-0.0484619	-0.154194	-0.191665	-0.161099	-0.146041	-0.128236	-0.201411	-0.182581	-0.142963	-0.146185	-0.108687	-0.181458	-0.0821744	-0.0979522	-0.111902	-0.117088	-0.0930631	-0.100345	-0.12043	-0.0600872	-0.0103921	0.10668	-0.192145	-0.0557245	-0.087673
Ralstonia pickettii	-0.125737	-0.180008	-0.00895918	-0.0113591	-0.120445	-0.0347031	-0.0824913	-0.00604747	-0.0300422	-0.0127663	-0.0160597	-0.00539123	-0.00763413	-0.00479719	-0.00303089	-0.0766118	0.614555	-0.0223348	-0.0599637	-0.0195913	-0.211456	-0.0382603	-0.138326	-0.0805186	-0.0444666	-0.127628	-0.209156	-0.157348	-0.151998	-0.131701	-0.199569	-0.199042	-0.157557	-0.150678	-0.122121	-0.186621	-0.0893297	-0.104467	-0.134712	-0.119355	-0.0799644	-0.114487	-0.127285	-0.0670814	-0.0312822	0.108006	-0.190767	-0.0778621	-0.0906089
Kinneretia sp. DAIF2	0.222087	-0.166566	-0.076999	-0.0413816	-0.0503476	-0.0682577	-0.00187978	-0.0713363	-0.0388826	-0.0647284	-0.0681274	-0.0708547	-0.0653534	-0.0565709	-0.0707647	-0.128321	0.0564644	-0.0166231	0.0781101	-0.00494001	-0.0313477	-0.03171	0.274142	0.213812	0.00659322	-0.14407	0.656038	0.335947	0.319206	0.0947093	-0.044699	0.197271	-0.182133	0.130626	0.647413	0.19942	0.484328	0.27674	0.67864	0.481029	0.088662	0.414653	0.236003	0.260955	0.440981	-0.0190989	0.373074	0.26663	0.0393074
Fluviibacter phosphoraccumulans	0.464583	0.389647	-0.108773	-0.107646	0.335362	-0.018136	0.166478	-0.110281	-0.072526	-0.10458	-0.129292	-0.11595	-0.103938	-0.0963261	-0.125066	0.178958	0.262546	-0.149072	-0.0710299	-0.093158	0.794374	-0.0822235	0.323196	0.0415363	-0.0527653	0.445113	0.501556	0.181307	0.318036	0.143577	0.555551	0.591957	0.43352	0.420677	0.157313	0.689392	0.104049	0.166261	0.205946	0.222085	-0.0285263	0.220855	0.170725	-0.195172	0.25904	-0.00704928	0.573206	0.271225	0.450838
Granulibacter bethesdensis	0.4364	0.287637	-0.148941	-0.128854	0.182435	-0.0849114	0.0675827	-0.141253	-0.0504822	-0.125595	-0.134354	-0.144792	-0.142083	-0.134781	-0.146482	0.0649241	0.227267	-0.138884	0.195673	-0.0767395	0.273558	-0.00515692	0.674856	0.465339	0.0486963	0.163023	0.64177	0.801187	0.891421	0.228047	0.177335	0.41905	0.142507	0.622071	0.782205	0.421038	0.769009	0.579481	0.713037	0.57711	0.0926994	0.704035	0.505372	0.0788415	0.564006	-0.0442541	0.868728	0.509316	0.457694
Bradyrhizobium erythrophlei	0.0958816	-0.110565	-0.154663	-0.10274	-0.0678891	-0.124436	-0.0605651	-0.145668	-0.0818173	-0.14445	-0.146331	-0.14649	-0.145866	-0.126013	-0.150668	-0.201894	0.137081	-0.184289	0.123075	-0.0555813	-0.00769203	0.00536716	0.507742	0.291172	-0.0260361	-0.107953	0.51776	0.481341	0.411093	0.190686	0.142484	0.210786	0.17066	0.358788	0.714712	0.343188	0.59179	0.464851	0.654596	0.588408	-0.00549563	0.530018	0.448178	0.13696	0.529928	-0.129009	0.522539	0.656784	0.139948
Bradyrhizobium diazoefficiens	-0.675844	-0.3005	0.197656	0.209538	0.0166643	0.160159	0.0901945	0.206552	0.16896	0.179646	0.181542	0.206848	0.201416	0.215675	0.199681	-0.188472	-0.00261349	-0.00668397	0.0154133	0.199059	-0.188147	0.155348	-0.0777605	-0.0982847	0.12639	-0.257625	-0.254394	-0.211322	-0.315396	-0.0822726	-0.113088	-0.274949	0.0919329	-0.336803	-0.251669	-0.147499	-0.224685	-0.142433	-0.296428	-0.303674	-0.177869	-0.271108	-0.234101	-0.0617512	-0.0353836	-0.210814	-0.292639	0.00835558	-0.0725898
Methylorubrum extorquens	-0.145928	0.454134	-0.0390799	-0.0367553	0.181625	0.00727568	0.087365	-0.0278628	-0.0347207	-0.0500802	-0.0599039	-0.0329804	-0.028055	-0.0177582	-0.0397859	0.0322747	0.330919	-0.0748124	-0.0670488	-0.0246612	0.403749	-0.0393684	0.0814106	-0.028696	-0.0694798	0.39666	0.349393	0.077509	0.0781672	0.136433	0.71811	0.467727	0.565243	-0.0499612	0.0602961	0.533711	0.120931	-0.0469963	0.00773635	-0.0536919	0.0558751	-0.0151214	-0.180063	-0.0589766	0.0213025	0.00978353	0.32317	0.27988	0.195092
Rhizobium leguminosarum	-0.756746	-0.47762	-0.0029062	0.0346148	-0.214352	-0.00683343	-0.134563	0.00850355	0.0190731	0.00293535	0.0156485	0.0130096	0.00470154	0.0159253	0.0149361	-0.220247	-0.118398	0.0326371	0.159893	0.000576837	-0.442159	0.152751	-0.0295896	0.11353	0.0110855	-0.417126	-0.20097	-0.0086642	-0.210675	0.125926	-0.196468	-0.329659	-0.0730658	-0.171099	-0.0763297	-0.323846	0.0640665	0.172387	-0.123352	-0.0350984	-0.0883821	0.0266285	0.0493369	0.104266	-0.14397	-0.294806	-0.265341	0.0933223	-0.0700825
Paracoccus mutanolyticus	0.204798	0.74416	-0.0829354	-0.0834865	0.175208	-0.0532211	0.0648081	-0.0775435	-0.0728769	-0.0838569	-0.0953117	-0.080743	-0.0800494	-0.0747645	-0.0843205	0.109686	0.179978	-0.0868893	-0.0936933	-0.0756183	0.398994	-0.0770506	0.0954758	-0.0327581	-0.0687285	0.374781	0.229281	0.11697	0.298097	0.0165549	0.598561	0.57192	0.597392	0.0767909	0.0112282	0.396621	0.021264	-0.0508095	-0.00680963	-0.0948533	-0.0015693	-0.0183692	-0.0545808	-0.131624	-0.0261842	-0.0567353	0.423341	0.212564	0.130777
Sphingomo1s melonis	-0.153857	-0.180779	-0.00816254	-0.0124685	-0.122209	-0.0331366	-0.0817172	-0.00540702	-0.0305938	-0.0114914	-0.0141362	-0.00465191	-0.00658922	-0.00519208	-0.00166109	-0.065307	0.664945	-0.0227844	-0.0602774	-0.0191221	-0.211706	-0.0377419	-0.146286	-0.0824703	-0.0451839	-0.13333	-0.211237	-0.157412	-0.15425	-0.124865	-0.192292	-0.19949	-0.155548	-0.155108	-0.13109	-0.190081	-0.088059	-0.110509	-0.142661	-0.125335	-0.0757647	-0.119005	-0.129498	-0.0571707	-0.0392899	0.0705073	-0.193794	-0.0987155	-0.0906881
Flavobacterium johnsoniae	0.404482	0.634705	-0.0790953	-0.109224	0.357724	0.00551684	0.179017	-0.084018	-0.0840514	-0.0681532	-0.0970674	-0.0866967	-0.0688905	-0.0928849	-0.0827724	0.450277	0.299869	-0.14056	-0.092835	-0.125165	0.804516	-0.080417	0.0775837	-0.0223295	-0.102251	0.686222	0.484044	0.0402061	0.0850191	0.0833136	0.761921	0.68	0.599652	0.22746	-0.0190615	0.695069	-0.085806	0.0306648	0.0222946	0.0331253	-0.0411769	0.0405566	-0.0582239	-0.236749	0.0026279	0.115445	0.468403	0.0756267	0.209501
Chryseobacterium sp. 3008163	0.297582	0.489592	-0.0142664	-0.0217259	0.285453	0.0479683	0.174102	-0.0142451	-0.022425	-0.0249875	-0.050575	-0.0217524	-0.00967074	-0.00353808	-0.0293125	0.148361	0.227411	-0.0863553	-0.100061	-0.0522688	0.684494	-0.0217789	0.0221088	-0.104923	-0.0650827	0.67959	0.305088	-0.139973	-0.0442007	0.0966187	0.635608	0.498832	0.529141	0.0790889	-0.136134	0.667663	-0.145677	-0.110641	-0.0898818	-0.0865528	-0.0123279	-0.0517429	-0.140666	-0.262129	-0.0897682	0.340573	0.243513	0.0667291	0.192092
Bacteroides thetaiotaomicron	-0.0182339	-0.17614	-0.0442688	-0.0333842	-0.168226	-0.0749945	-0.116277	-0.0405572	-0.0464413	-0.0406972	-0.0523096	-0.0404583	-0.0475968	-0.0332235	-0.0436722	-0.112901	-0.121	-0.0479239	-0.0659627	-0.0123071	-0.201874	-0.0359865	-0.106775	-0.0818875	-0.0238067	-0.203657	-0.112154	0.0791976	-0.0767165	-0.170395	-0.175544	-0.204893	-0.150241	-0.0577771	0.0232463	-0.191437	0.00602819	0.021365	0.0242953	0.135202	-0.0693903	0.00294765	-0.141655	0.204318	-0.1545	-0.115921	-0.110117	-0.170463	-0.128503
Bacteroides uniformis	-0.377235	-0.290327	-0.0392964	-0.0426606	-0.202185	-0.0827812	-0.14069	-0.034507	-0.0553909	-0.0494439	-0.0466397	-0.0318812	-0.0391709	-0.034152	-0.0334243	-0.127291	-0.111842	-0.0588908	-0.0939249	-0.0294764	-0.296557	-0.0614073	-0.120244	-0.112165	-0.0629347	-0.26799	-0.17084	-0.0205869	-0.191226	-0.298862	-0.205233	-0.310595	-0.0441419	-0.234528	-0.0229803	-0.231305	-0.0278552	-0.0448348	-0.100941	-0.136589	-0.0158976	-0.165202	-0.238216	-0.0731831	-0.0608834	-0.136282	-0.179597	-0.115674	-0.271631
Bacteroides ovatus	-0.407972	-0.254069	-0.0483703	-0.045432	-0.18874	-0.0773974	-0.136401	-0.0428731	-0.0510195	-0.0535374	-0.0449626	-0.0400409	-0.0470707	-0.0417541	-0.0397894	-0.127314	-0.0727792	-0.0542837	-0.009035	-0.0296025	-0.282973	-0.0172302	-0.0411371	-0.0210604	-0.0437524	-0.259882	-0.121876	0.0795005	-0.130595	-0.22548	-0.189911	-0.244033	-0.0144203	-0.181764	0.0486069	-0.195652	0.045208	0.0581119	-0.0114922	-0.0424046	0.0869337	-0.0497526	-0.177273	-0.052817	-0.0451864	-0.178469	-0.121633	-0.068661	-0.245052
Bacteroides sp. M10	-0.368904	-0.235108	-0.0404233	-0.0416598	-0.150753	-0.072047	-0.111267	-0.0362412	-0.0461504	-0.0465971	-0.0454949	-0.0334202	-0.0385715	-0.0372643	-0.0327402	-0.0864646	-0.0205844	-0.0416291	-0.0229567	-0.0243504	-0.231834	-0.0292858	-0.0194125	-0.0267863	-0.0414018	-0.20041	-0.0794055	0.0766235	-0.152094	-0.210232	-0.14114	-0.213438	0.0491835	-0.166495	0.0596596	-0.144359	0.0359351	0.0392993	-0.0115047	-0.0614453	-0.0882782	-0.070021	-0.15275	-0.052859	0.0127011	-0.147756	-0.0799799	-0.0298372	-0.234694
Bacteroides xylanisolvens	-0.293374	-0.194115	-0.0551737	-0.0460596	-0.22245	-0.0865472	-0.152563	-0.048662	-0.0658384	-0.0563137	-0.0435162	-0.0478918	-0.0563834	-0.0427875	-0.051172	-0.16243	-0.182232	-0.0625658	-0.0865122	-0.027262	-0.293416	-0.0478883	-0.143448	-0.121993	-0.0501106	-0.286469	-0.192945	0.028828	-0.0729132	-0.248826	-0.228797	-0.239519	-0.14755	-0.190116	-0.0428231	-0.255364	-0.0184964	-0.0300325	-0.0545759	0.00198588	0.320359	-0.0828867	-0.210688	0.0821808	-0.154281	-0.183724	-0.188579	-0.201605	-0.183798
Bacteroides caccae	-0.0501204	-0.193891	-0.0505034	-0.0395995	-0.183633	-0.0823442	-0.129097	-0.0465062	-0.0546533	-0.047626	-0.0577886	-0.0462342	-0.0538437	-0.0390219	-0.0496084	-0.125232	-0.139386	-0.0524454	-0.0729703	-0.0206793	-0.228264	-0.0416606	-0.118335	-0.0909958	-0.0341011	-0.223992	-0.111902	0.0382098	-0.0821182	-0.186033	-0.18294	-0.218858	-0.166049	-0.0827249	0.0166656	-0.207437	0.0108336	0.0165073	0.0104996	0.0951513	-0.0535985	-0.0192654	-0.15153	0.139967	-0.160159	-0.121876	-0.128252	-0.169318	-0.143165
Bacteroides luhongzhouii	-0.371926	-0.239138	-0.0418888	-0.0432428	-0.156355	-0.0745613	-0.11531	-0.0376232	-0.0486274	-0.0483046	-0.0473987	-0.0349167	-0.0403414	-0.0383892	-0.034581	-0.0901647	-0.0294047	-0.0440854	-0.0315351	-0.0256868	-0.236148	-0.0335382	-0.0296515	-0.0372816	-0.0436295	-0.206435	-0.0871494	0.0700647	-0.155062	-0.221119	-0.144019	-0.222938	0.0408282	-0.171606	0.0514576	-0.152064	0.0333549	0.0334663	-0.0199033	-0.0674751	-0.0862014	-0.0783089	-0.159961	-0.0538571	0.00236959	-0.150877	-0.0864963	-0.0405563	-0.233675
Bacteroides cellulosilyticus	-0.228922	-0.280036	-0.0493709	-0.0384676	-0.212379	-0.0913314	-0.148068	-0.0437865	-0.0542194	-0.0528045	-0.0606406	-0.0426074	-0.0520381	-0.0354808	-0.0468283	-0.171849	-0.125005	-0.0594117	-0.0734407	-0.0158794	-0.280939	-0.0411716	-0.110096	-0.0952051	-0.0385448	-0.276206	-0.139624	0.0490137	-0.152478	-0.250347	-0.209665	-0.286884	-0.100571	-0.158431	0.0233418	-0.230816	0.00923291	0.0194595	-0.013524	0.0242442	-0.115403	-0.0651308	-0.190122	0.0797353	-0.117906	-0.163922	-0.155566	-0.143027	-0.212841
Bacteroides fragilis	-0.370609	-0.276576	0.00140059	-0.00519739	-0.112033	-0.0278915	-0.0730601	0.00428422	-0.0141132	-0.00223436	-0.00832714	0.00755541	0.00749732	0.0023286	0.00824237	-0.0338866	-0.0483495	-0.0557463	-0.0470601	0.00870891	-0.183634	-0.0200371	-0.102815	-0.0502992	-0.0191601	-0.217251	-0.0546298	0.0198401	-0.180159	-0.238345	-0.121731	-0.238083	-0.0350556	-0.193656	0.0137588	-0.179164	0.00238927	0.0284281	-0.0449401	-0.0764087	-0.0886337	-0.101081	-0.227977	-0.0083844	-0.0565079	-0.175343	-0.104776	-0.125096	-0.199717
Phocaeicola dorei	-0.113716	-0.268438	-0.0493125	-0.0551404	-0.172967	-0.0836063	-0.140072	-0.0465594	-0.0555979	-0.0607639	-0.0602584	-0.04346	-0.0483065	-0.0460782	-0.0449758	-0.104823	-0.177398	-0.00127589	-0.108546	-0.067789	-0.248859	-0.0823877	-0.186404	-0.0903688	-0.0970496	-0.216762	-0.186221	-0.150414	-0.149856	-0.263399	-0.224874	-0.309505	-0.164446	-0.138573	-0.0677449	-0.254649	-0.106251	-0.0859329	-0.157161	-0.153674	0.0296726	-0.177194	-0.248455	-0.13883	-0.127081	-0.00258314	-0.223456	-0.147831	-0.291671
Phocaeicola vulgatus	-0.320964	-0.277698	-0.0553059	-0.0512861	-0.198163	-0.0933086	-0.145609	-0.0501411	-0.0577762	-0.058289	-0.0619138	-0.0474001	-0.0547535	-0.0483366	-0.0474286	-0.116635	-0.0576716	-0.0538432	-0.0273878	-0.0315103	-0.286042	-0.030643	-0.0533253	-0.0331797	-0.0446408	-0.257668	-0.0942684	0.116997	-0.158297	-0.240575	-0.186993	-0.268013	-0.0361535	-0.152526	0.0797237	-0.201171	0.0630256	0.0663918	0.0185363	0.0262239	-0.108379	-0.0305135	-0.177928	0.0422577	-0.0604935	-0.17851	-0.103548	-0.0916587	-0.258984
Phocaeicola salanitronis	-0.31003	-0.295302	-0.0223113	-0.0180596	-0.194203	-0.0710187	-0.122801	-0.0170771	-0.0316532	-0.0345782	-0.0366218	-0.0156745	-0.0248659	-0.00946576	-0.0218141	-0.189285	-0.121681	-0.0605578	-0.107377	0.00641214	-0.254125	-0.0564139	-0.108823	-0.138316	-0.037187	-0.297324	-0.179241	0.0409782	-0.189509	-0.307483	-0.226526	-0.303287	-0.0655302	-0.228356	-0.016359	-0.222482	-0.0666425	-0.0671734	-0.0715405	-0.0384394	-0.0844922	-0.137045	-0.243921	0.0870094	-0.0550125	-0.185529	-0.176241	-0.126087	-0.243673
Parabacteroides distasonis	-0.339574	-0.269276	-0.0511742	-0.0484418	-0.188867	-0.0915835	-0.138058	-0.0461828	-0.0595665	-0.0571336	-0.0601421	-0.0440417	-0.051225	-0.0433446	-0.0457968	-0.127195	-0.0655232	-0.0508657	-0.0640272	-0.024003	-0.265642	-0.0493896	-0.0662676	-0.076537	-0.0481885	-0.242205	-0.116705	0.0612297	-0.168135	-0.253764	-0.178242	-0.261362	0.00379183	-0.180444	0.0397786	-0.189286	0.0145373	0.0190599	-0.0240401	-0.0460777	-0.114862	-0.094524	-0.19032	-0.00434476	-0.0347266	-0.165992	-0.118973	-0.0893774	-0.242706
Parabacteroides johnsonii	-0.35419	-0.289252	0.0885994	0.100673	-0.0673962	0.0529089	-0.00344213	0.0945216	0.0833291	0.0836035	0.0700678	0.0959007	0.0888213	0.104436	0.0896683	-0.158367	-0.11831	-0.0663733	8.32357e-05	0.119838	-0.208786	0.0581304	-0.0853047	-0.00974059	0.0946779	-0.232887	-0.103078	0.0124256	-0.155512	-0.221141	-0.199596	-0.261414	-0.0701976	-0.219332	0.000748838	-0.197511	-0.0523618	0.0608314	-0.0355671	-0.0604923	-0.0948077	-0.0770017	-0.19002	0.00641513	-0.0361667	-0.1038	-0.149997	-0.112825	-0.0975038
Parabacteroides merdae	-0.052704	-0.197402	-0.0335059	-0.0270908	-0.147934	-0.0550505	-0.10018	-0.032011	-0.0434726	-0.0326536	-0.0450951	-0.0323609	-0.039509	-0.0241817	-0.0358451	-0.111191	-0.111118	-0.0356744	-0.0631374	-0.000528591	-0.161645	-0.0319052	-0.107059	-0.0920984	-0.0198463	-0.199296	-0.113019	0.00673538	-0.0885171	-0.173852	-0.170828	-0.206042	-0.140778	-0.11034	-0.00236684	-0.163915	-0.0178885	0.0141748	0.0188991	0.0434089	-0.0889387	-0.0204518	-0.142588	0.0771136	-0.144073	-0.10536	-0.121035	-0.148617	-0.0818088
Alistipes onderdonkii	-0.401391	-0.266373	-0.0119367	-0.0173172	-0.154662	-0.0530893	-0.100256	-0.00764841	-0.0309119	-0.0231824	-0.0225217	-0.00533864	-0.0109747	-0.00824919	-0.00692759	-0.106686	-0.0726209	-0.0440607	-0.0826009	-0.00209177	-0.250952	-0.0465942	-0.0904524	-0.107697	-0.040284	-0.223161	-0.146702	-0.0271794	-0.205419	-0.247955	-0.150777	-0.274073	0.0161349	-0.241305	-0.0323439	-0.185327	-0.0324513	-0.0584985	-0.109568	-0.167469	-0.106901	-0.179937	-0.213923	-0.0625993	-0.0147207	-0.120724	-0.153	-0.0685563	-0.22229
Alistipes dispar	-0.40826	-0.255818	-0.0119792	-0.0125116	-0.14614	-0.0530434	-0.0963456	-0.00674784	-0.0259301	-0.0241635	-0.0217943	-0.00487812	-0.0113937	-0.00389023	-0.00831663	-0.139448	-0.066006	-0.0442367	-0.0758704	0.00378938	-0.233626	-0.0404346	-0.0808642	-0.101176	-0.0321585	-0.22028	-0.127946	-0.013989	-0.192568	-0.242648	-0.136293	-0.253796	0.029665	-0.229795	-0.0239802	-0.168552	-0.0213034	-0.0503406	-0.096726	-0.158291	-0.09343	-0.169341	-0.20157	-0.0623651	-0.000179402	-0.136604	-0.142595	-0.064964	-0.210399
Alistipes shahii	-0.388433	-0.232745	-0.0417214	-0.0438813	-0.156192	-0.0810502	-0.115716	-0.0372001	-0.0558059	-0.0527087	-0.0507904	-0.0353289	-0.0411768	-0.0357494	-0.0378852	-0.115085	-0.0440888	-0.0391825	-0.0918025	-0.025615	-0.213658	-0.0658212	-0.0762221	-0.11037	-0.0569515	-0.196478	-0.108339	0.00994841	-0.182237	-0.255602	-0.122555	-0.229099	0.0511373	-0.213421	-0.00971999	-0.149433	-0.0138098	-0.0481718	-0.0815777	-0.141056	-0.102076	-0.160019	-0.186499	-0.0606467	0.0060608	-0.145375	-0.115751	-0.068743	-0.222925
Alistipes communis	-0.407059	-0.274064	-0.0346762	-0.0340655	-0.18152	-0.0785101	-0.126495	-0.0289646	-0.0485904	-0.0471534	-0.0438288	-0.0269617	-0.0343061	-0.0253652	-0.0307479	-0.156285	-0.0918498	-0.0516377	-0.0988293	-0.0224116	-0.262113	-0.0622829	-0.112625	-0.121187	-0.0576703	-0.244386	-0.119653	-0.0277314	-0.196551	-0.271707	-0.144228	-0.275091	-0.0202718	-0.247081	-0.0234518	-0.19119	-0.00226185	-0.0614484	-0.0994919	-0.156915	-0.0727973	-0.17629	-0.211796	-0.0629726	-0.0277288	-0.142684	-0.159096	-0.0876989	-0.235111
Odoribacter splanchnicus	0.0955557	-0.209661	-0.028242	-0.0352335	-0.128168	-0.0524424	-0.0962822	-0.0283981	-0.0381248	-0.0383194	-0.044106	-0.0266644	-0.0311346	-0.0277463	-0.0279796	-0.0786379	-0.177734	-0.0506227	-0.098304	-0.0508872	-0.166926	-0.0648425	-0.157896	-0.0944198	-0.0806568	-0.149843	-0.169603	-0.185565	-0.124893	-0.173072	-0.172258	-0.254579	-0.172808	-0.0539677	-0.0803885	-0.186498	-0.101285	-0.109986	-0.130452	-0.126294	-0.0764893	-0.143364	-0.180084	-0.116747	-0.122785	0.0932092	-0.193191	-0.0835766	-0.189496
Treponema denticola	-0.0618393	0.260017	-0.0886629	-0.0767952	0.154788	-0.0235549	0.0446089	-0.0856288	-0.0876478	-0.100955	-0.109263	-0.0900968	-0.0730942	-0.0700167	-0.0989502	0.0354406	0.0779974	-0.054645	-0.179914	-0.104314	0.609672	-0.0754877	-0.0754105	-0.196044	-0.152357	0.379216	0.148181	-0.219636	-0.146356	0.315189	0.604888	0.481041	0.580497	-0.0623998	-0.26487	0.447356	-0.170103	-0.206365	-0.234001	-0.166401	-0.115596	-0.196478	-0.183572	0.0736025	-0.233055	0.00794305	0.11707	0.167623	0.261039
Akkermansia muciniphila	-0.393318	-0.228003	-0.00702674	-0.00931129	-0.127282	-0.0466541	-0.081865	-0.00253389	-0.0227457	-0.0177042	-0.0168184	-0.000692031	-0.00632051	-0.00140187	-0.00314101	-0.109451	-0.0400488	-0.0371642	-0.0696394	0.0109276	-0.210619	-0.0365643	-0.0591907	-0.0945129	-0.0234878	-0.192311	-0.118577	0.0079388	-0.183363	-0.237756	-0.131909	-0.22515	0.0652772	-0.219183	-0.0137877	-0.145309	-0.0327807	-0.045364	-0.0807162	-0.143274	-0.106298	-0.158496	-0.187195	-0.0558352	0.0219194	-0.137124	-0.118816	-0.0587426	-0.206203
Tepiditoga spiralis	-0.273282	0.0937442	-0.0561523	-0.0511719	-0.107908	-0.026093	-0.0684334	-0.0496931	-0.0639649	-0.059753	-0.0207312	-0.0519326	-0.0531852	-0.045663	-0.0550782	-0.112756	-0.179149	-0.0399974	-0.068892	-0.0456158	-0.0703264	-0.0544348	-0.0871199	-0.0987696	-0.0660061	-0.00581951	-0.144451	-0.0515216	0.118835	-0.00403019	0.00566134	0.0412088	-0.0425687	-0.130383	-0.140482	-0.0611726	0.00960607	-0.103298	-0.100774	-0.11999	0.898748	-0.0729724	-0.0712099	-0.00247781	-0.104205	0.0718541	-0.103306	-0.0587931	0.127493
Methanosarci1 mazei	0.0676118	0.35541	-0.0410447	-0.0423616	0.164613	-0.0111312	0.087141	-0.0431438	-0.0351738	-0.0553622	-0.0549593	-0.0493445	-0.0418887	-0.0321159	-0.0582973	0.0293897	0.0909886	-0.0815422	-0.0925512	-0.0287445	0.470731	-0.0583239	0.116331	-0.101585	-0.00961881	0.290251	0.276507	-0.0245983	0.131512	0.319224	0.495367	0.525097	0.432841	0.0411419	-0.0131786	0.377149	0.136999	-0.129714	-0.0201507	-0.117808	-0.1277	-0.0731684	0.00661339	-0.0512785	0.00159733	0.00970579	0.311068	0.263984	0.320281
Halosimplex litoreum	0.227661	0.506208	-0.0677391	-0.0731647	0.224663	-0.0244781	0.108174	-0.0642901	-0.0751183	-0.0685093	-0.0907332	-0.0699029	-0.0614432	-0.0541707	-0.0777666	0.137461	0.17444	-0.0538046	-0.137495	-0.0923831	0.581335	-0.0721719	-0.0256275	-0.12983	-0.100951	0.536491	0.275396	-0.087234	0.0339854	0.0165968	0.611141	0.483564	0.506718	0.10393	-0.169655	0.51681	-0.169657	-0.120727	-0.139753	-0.133014	-0.00972095	-0.106167	-0.162767	-0.210804	-0.0513102	0.112345	0.220017	-0.0553668	0.120097
uncultured human fecal virus	-0.653876	-0.270625	-0.0390454	-0.0297019	-0.221046	-0.0294424	-0.149175	-0.0305413	-0.0613547	-0.0343676	-0.013491	-0.0296309	-0.030745	-0.0292982	-0.0307455	-0.143865	-0.313246	-0.0447712	-0.117659	-0.0298359	-0.336646	-0.0567512	-0.256645	-0.17604	-0.0928498	-0.291577	-0.292933	-0.231191	-0.153657	0.238995	-0.0591347	-0.19907	-0.146555	-0.302652	-0.316216	-0.330594	-0.110316	-0.205969	-0.32394	-0.249035	0.282822	-0.259219	-0.169995	0.411715	-0.251332	-0.204844	-0.344987	-0.0618693	0.131799
Synechococcus phage S-CAM8	0.371504	0.55521	-0.0836242	-0.0893771	0.301929	-0.00852195	0.145459	-0.0870472	-0.0674457	-0.0859842	-0.122456	-0.092905	-0.0826406	-0.0775409	-0.0996225	0.196877	0.277747	-0.113368	-0.104543	-0.0963257	0.765745	-0.07407	0.0605356	-0.0150897	-0.0768178	0.609399	0.424572	0.0423188	0.0443017	0.0847624	0.681519	0.604014	0.627747	0.144662	-0.0610359	0.664028	-0.121705	0.0298251	-0.0161268	0.0386391	-0.061638	0.0237631	0.00782091	-0.187012	-0.0416265	0.13389	0.351695	0.0860648	0.209864
Torulaspora delbrueckii	-0.204095	0.0912662	0.994791	0.98639	0.833459	0.987645	0.942587	0.994805	0.977422	0.996583	0.991823	0.995573	0.99599	0.986251	0.997385	0.119235	-0.00499982	0.0474954	0.754563	0.965527	0.0522545	0.925125	0.37401	0.551933	0.943184	-0.0382219	-0.0645554	-0.0840511	-0.0466566	0.482886	-0.0374248	-0.0381895	0.017154	-0.0763016	-0.0863239	0.0915794	-0.127035	0.198701	0.00974583	-0.0363539	-0.0332488	0.162705	0.00264086	-0.0710316	0.174853	-0.0414506	-0.0723128	0.129998	0.397742
Kazachstania 1ganishii	-0.218593	0.0826421	0.999103	0.991536	0.836751	0.987815	0.942326	0.999465	0.982065	0.997548	0.992598	0.999638	0.999194	0.993729	0.998956	0.0883561	-0.0167314	0.0513482	0.733251	0.973818	0.0599243	0.918547	0.360227	0.524227	0.946132	-0.0623209	-0.10381	-0.109132	-0.0535977	0.476613	-0.0327624	-0.059403	0.0227212	-0.0754641	-0.124442	0.0793648	-0.158229	0.174624	-0.0355792	-0.0698818	-0.0617501	0.127228	-0.0237286	-0.0695221	0.157189	-0.0736978	-0.08809	0.115942	0.413832
Debaryomyces hansenii	-0.220405	0.0715134	0.98848	0.997141	0.835177	0.981047	0.93439	0.991916	0.992759	0.985427	0.983088	0.991626	0.988591	0.995895	0.987494	-0.0134682	-0.000369236	0.0524687	0.790404	0.97744	0.0660073	0.951075	0.410262	0.589548	0.961273	-0.0748399	-0.0517142	-0.0568057	-0.0256142	0.527267	-0.0221823	-0.0249269	0.0331042	-0.0360192	-0.0605786	0.104169	-0.0988517	0.248815	0.0324698	-0.00421082	-0.0582256	0.204138	0.0135463	-0.0617346	0.173241	-0.0854998	-0.0661593	0.165807	0.422227
Blautia pseudococcoides	-0.770925	-0.400635	-0.0238794	0.00749124	-0.248092	-0.0375872	-0.15745	-0.0141986	-0.0477423	-0.0243223	-0.00820736	-0.0121999	-0.0163029	-0.00983162	-0.0150282	-0.208219	-0.308721	0.0366221	-0.119496	-0.0213011	-0.391179	-0.00050529	-0.259291	-0.186177	-0.0842685	-0.361432	-0.344726	-0.270034	-0.235569	0.0894088	-0.126937	-0.302318	-0.0483254	-0.350005	-0.344449	-0.373453	-0.182038	-0.209965	-0.370488	-0.281014	-0.0101844	-0.290218	0.0589786	0.275845	-0.128219	-0.240737	-0.402393	0.0908407	0.0108724
A1erostipes caccae	-0.388676	-0.22842	-0.0366999	-0.000671653	-0.148535	-0.0654285	-0.106971	-0.0325033	-0.0506452	-0.0409972	-0.0287973	-0.0300718	-0.0360647	-0.0305129	-0.0316768	-0.126765	-0.123538	-0.00868718	-0.0884168	-0.0610905	-0.211579	0.0318186	-0.127239	-0.110746	-0.0702546	-0.192955	-0.213027	-0.144685	-0.124575	-0.214862	-0.169045	-0.203077	0.0726802	-0.194919	-0.179932	-0.197231	-0.165559	-0.112169	-0.201112	-0.140223	-0.102217	-0.148582	0.325765	-0.114723	0.0877246	-0.129731	-0.21895	0.202935	-0.202426
Coprococcus eutactus	-0.687244	-0.330005	-0.0341493	-0.0173723	-0.230687	-0.0312626	-0.15014	-0.0252481	-0.0543731	-0.0307122	-0.0167345	-0.0242098	-0.0258991	-0.0215507	-0.026269	-0.162539	-0.325337	-0.0307158	-0.116196	-0.0221139	-0.344553	-0.0451484	-0.250997	-0.173912	-0.0850293	-0.316065	-0.28301	-0.242256	-0.191667	0.228195	-0.0603261	-0.224844	-0.129709	-0.306665	-0.316173	-0.332945	-0.125374	-0.190569	-0.333123	-0.253823	0.109009	-0.261826	-0.12254	0.395009	-0.236015	-0.221354	-0.356025	-0.0347059	0.136632
Lachnoclostridium sp. YL32	-0.811055	-0.46274	0.0967599	0.112928	-0.181816	0.0508557	-0.0738608	0.106775	0.0672019	0.08899	0.0991171	0.110273	0.101833	0.10877	0.108228	-0.210529	-0.144584	-0.0321958	-0.0348368	0.0976542	-0.474212	0.0844735	-0.190883	-0.117011	0.0331548	-0.424372	-0.377117	-0.210202	-0.313059	-0.0871126	-0.277667	-0.429155	-0.0479157	-0.416144	-0.257771	-0.399122	-0.185706	-0.149814	-0.324171	-0.306264	-0.0879708	-0.295637	-0.15469	0.0959638	-0.0872573	-0.256195	-0.410473	-0.0108169	-0.162331
Lachnoclostridium phocaeense	-0.361519	-0.207753	-0.0315067	0.00433263	-0.133769	-0.0554795	-0.0946625	-0.0276772	-0.0437792	-0.0347601	-0.0225422	-0.0253865	-0.0308842	-0.0259961	-0.0270782	-0.119521	-0.191382	-0.00162957	-0.0785311	-0.0542661	-0.191833	0.0388111	-0.111893	-0.100081	-0.062831	-0.176399	-0.201521	-0.135376	-0.107255	-0.181778	-0.150344	-0.180965	0.0876566	-0.17701	-0.170618	-0.181456	-0.15939	-0.102877	-0.187712	-0.126573	-0.0865069	-0.136359	0.336241	-0.0932184	0.0911634	-0.118471	-0.202718	0.224911	-0.181497
Wujia chipingensis	-0.567795	-0.29728	-0.00896137	-0.00301016	-0.175995	0.00400955	-0.106871	-0.00213284	-0.0281612	-0.00256095	0.00244635	-0.00132226	-0.000570298	-0.00117672	-0.0020418	-0.116681	-0.269741	-0.02826	-0.0838495	0.00982349	-0.292449	-0.0344247	-0.213992	-0.134263	-0.0591235	-0.257811	-0.235051	-0.213432	-0.184711	0.341785	0.00754546	-0.189767	-0.106588	-0.245551	-0.265804	-0.286912	-0.0710749	-0.16407	-0.277098	-0.211933	-0.00726608	-0.226364	-0.15345	0.489132	-0.222183	-0.178409	-0.294461	-0.00374079	0.193311
A1erocolum1 chitinilytica	-0.748534	-0.396041	-0.0313107	-0.00669504	-0.248732	-0.036464	-0.162009	-0.021751	-0.05079	-0.0283984	-0.0165589	-0.0200361	-0.0232217	-0.0176032	-0.0218053	-0.187918	-0.294125	0.027932	-0.102952	-0.0267492	-0.385619	-0.0192557	-0.253507	-0.1634	-0.083947	-0.351634	-0.311514	-0.252509	-0.228495	0.186739	-0.111664	-0.280214	-0.105045	-0.326126	-0.322664	-0.365107	-0.145278	-0.183223	-0.349101	-0.261455	-0.0183944	-0.264099	-0.0456338	0.359077	-0.199014	-0.235697	-0.385582	0.024304	0.0706339
Butyrivibrio hungatei	-0.702313	-0.373929	-0.0409947	-0.0202575	-0.242965	-0.0413359	-0.162108	-0.0320368	-0.0601989	-0.0377216	-0.0275773	-0.0305973	-0.0324204	-0.0280806	-0.0324901	-0.171747	-0.298856	-0.0116459	-0.114534	-0.0275483	-0.362772	-0.0386831	-0.248919	-0.168871	-0.0921278	-0.328647	-0.29172	-0.243662	-0.218251	0.222282	-0.0649397	-0.254599	-0.104192	-0.303019	-0.311104	-0.346852	-0.125756	-0.180791	-0.335239	-0.248578	-0.0124661	-0.260126	-0.0687921	0.395781	-0.211149	-0.226196	-0.362769	0.0122153	0.115085
Butyrivibrio fibrisolvens	-0.674579	-0.350365	-0.0342882	-0.0199001	-0.23065	-0.0304077	-0.151086	-0.025497	-0.053728	-0.0305757	-0.0207083	-0.0245221	-0.0258822	-0.0217063	-0.0265878	-0.169013	-0.285464	0.00031894	-0.111487	-0.017135	-0.346923	-0.0486685	-0.248446	-0.16819	-0.0855274	-0.31406	-0.278452	-0.237702	-0.208849	0.266096	-0.0446675	-0.237529	-0.117739	-0.29651	-0.301437	-0.333883	-0.104117	-0.187663	-0.321774	-0.248525	0.0215361	-0.261221	-0.137868	0.443125	-0.228346	-0.213388	-0.34859	-0.0178871	0.142681
Cellulosilyticum sp. WCF-2	-0.859706	-0.408612	0.188832	0.22572	-0.0848758	0.154423	0.032854	0.199509	0.161038	0.18327	0.199334	0.201625	0.195314	0.204662	0.19801	-0.208282	-0.27818	0.16669	0.0384359	0.174922	-0.396491	0.202005	-0.188881	-0.0817509	0.121152	-0.398515	-0.358994	-0.300926	-0.267919	0.0274386	-0.199191	-0.358183	-0.0733912	-0.394262	-0.373233	-0.362303	-0.247445	-0.171716	-0.392125	-0.315397	-0.0607783	-0.264575	0.0777439	0.0938822	-0.0812688	-0.256993	-0.439939	0.0573738	0.0135975
Lacrimispora saccharolytica	-0.815674	-0.433927	-0.00411887	0.00505773	-0.25312	-0.0226122	-0.15177	0.00499918	-0.0371131	-0.00440032	0.00494583	0.0073769	0.00381965	0.00485814	0.00664705	-0.169309	-0.2008	-0.0211227	-0.122434	0.00573651	-0.431032	-0.0320856	-0.264174	-0.192569	-0.0704363	-0.386355	-0.332651	-0.236962	-0.290498	0.103503	-0.13479	-0.346116	-0.0843398	-0.393552	-0.303725	-0.388229	-0.131677	-0.207079	-0.35026	-0.30941	-0.0462605	-0.321058	-0.180185	0.342116	-0.179385	-0.264036	-0.390155	-0.0313138	0.00209969
Lacrimispora sphenoides	-0.790838	-0.429766	-0.0312177	-0.0149196	-0.264389	-0.0460934	-0.171261	-0.0210796	-0.0550093	-0.0322622	-0.0227306	-0.0192076	-0.0234238	-0.0165616	-0.0223074	-0.213427	-0.266493	-0.0106207	-0.12683	-0.0135759	-0.410651	-0.0468053	-0.256962	-0.188377	-0.0871121	-0.376241	-0.294144	-0.222469	-0.271192	0.132377	-0.101144	-0.318847	-0.0810028	-0.369352	-0.28088	-0.368829	-0.102117	-0.192506	-0.325734	-0.285794	-0.05912	-0.300643	-0.155388	0.36944	-0.177602	-0.258802	-0.373031	-0.00702586	0.0237865
Simiaoa sunii	-0.707373	-0.357881	0.0885155	0.102087	-0.132396	0.0883844	-0.0386635	0.0966459	0.0639065	0.0929194	0.10085	0.0982766	0.0965434	0.0973016	0.0974263	-0.142827	-0.273821	-0.0101178	-0.0233673	0.0927549	-0.351833	0.0724761	-0.209307	-0.103522	0.0248834	-0.325208	-0.299553	-0.252035	-0.231988	0.298923	-0.0693269	-0.265853	-0.0977158	-0.314436	-0.31628	-0.33343	-0.12789	-0.16903	-0.328496	-0.257114	-0.0431853	-0.24829	-0.0950274	0.422407	-0.185728	-0.224557	-0.363374	0.0372638	0.147009
Sellimo1s intesti1lis	-0.37259	-0.212852	-0.0298009	0.00625336	-0.13549	-0.0555006	-0.0945757	-0.0256984	-0.0426057	-0.0337844	-0.0213092	-0.0235454	-0.0287524	-0.023987	-0.0250362	-0.122409	-0.168713	0.0894802	-0.071805	-0.0530658	-0.193857	0.0405184	-0.114099	-0.0991527	-0.0616202	-0.178422	-0.206835	-0.140285	-0.112363	-0.196568	-0.158973	-0.18941	0.0861791	-0.18031	-0.175765	-0.184287	-0.168285	-0.108694	-0.193384	-0.132084	-0.0936202	-0.137091	0.331586	-0.109048	0.0951439	-0.106097	-0.208341	0.213852	-0.190187
Lachnoa1erobaculum umeaense	-0.80314	-0.385255	-0.0434755	-0.0150142	-0.276457	-0.0567874	-0.180655	-0.0329889	-0.0671247	-0.0424182	-0.0226551	-0.0312779	-0.0359296	-0.0285317	-0.0333242	-0.199235	-0.319064	0.0460175	-0.129132	-0.0448821	-0.409257	-0.0325241	-0.275351	-0.193471	-0.0954192	-0.376605	-0.33605	-0.263331	-0.209933	0.0689464	-0.175291	-0.287513	-0.12567	-0.371099	-0.345887	-0.382045	-0.191269	-0.207967	-0.371938	-0.287366	0.144018	-0.285742	-0.0437796	0.260012	-0.194489	-0.247456	-0.412157	-0.0259958	0.0167898
Novisyntrophococcus fermenticellae	-0.676479	-0.36145	-0.0390332	-0.0215808	-0.234402	-0.0371401	-0.15568	-0.0309125	-0.06129	-0.0348982	-0.0250381	-0.0293742	-0.0310768	-0.0289499	-0.030821	-0.162787	-0.301212	-0.0164018	-0.121204	-0.029066	-0.351277	-0.0394887	-0.250555	-0.174607	-0.0960807	-0.312488	-0.293056	-0.242998	-0.216823	0.233958	-0.055886	-0.251124	-0.0724158	-0.301772	-0.305888	-0.33879	-0.117169	-0.196042	-0.327188	-0.250129	-0.0270586	-0.269085	-0.0509756	0.421518	-0.181694	-0.214203	-0.350491	0.057451	0.0955087
Qiania dongpingensis	-0.786188	-0.401243	0.115728	0.136634	-0.133437	0.103624	-0.027686	0.124862	0.0870761	0.117055	0.12697	0.126824	0.123487	0.126592	0.12518	-0.176899	-0.224991	0.0478126	-0.016764	0.116773	-0.388535	0.109436	-0.217448	-0.111765	0.045153	-0.365963	-0.353074	-0.283223	-0.263927	0.216997	-0.12172	-0.318141	-0.0647606	-0.359886	-0.350435	-0.366713	-0.178645	-0.189363	-0.366839	-0.293715	-0.0853333	-0.278166	-0.0308819	0.341688	-0.134891	-0.243539	-0.40767	0.0743563	0.0877348
Faecalibacterium sp. HTFF	-0.387242	-0.204123	-0.0286001	-0.0270784	-0.134573	-0.0130186	-0.0904366	-0.0231656	-0.0403018	-0.028431	-0.0237576	-0.0229581	-0.0179656	-0.0203149	-0.0252742	-0.0908832	-0.17109	-0.0311584	-0.0768989	0.029514	-0.202073	-0.0533694	-0.151411	-0.108015	-0.0630231	-0.182143	-0.15872	-0.136014	-0.134352	0.271553	0.158904	-0.116331	-0.0525047	-0.141756	-0.176438	-0.209849	0.0011425	-0.102938	-0.189189	-0.127348	0.0530291	-0.160402	-0.122094	0.387356	-0.167361	-0.131068	-0.188481	-0.0155512	0.24941
Faecalibacterium sp. I3389	-0.441669	-0.237024	-0.0195948	-0.0153073	-0.142844	-0.00611947	-0.0919783	-0.0133543	-0.0319382	-0.019523	-0.0147276	-0.0130407	-0.00907649	-0.00950757	-0.0159157	-0.114351	-0.183648	-0.0354025	-0.0765349	0.0361426	-0.227418	-0.0433626	-0.164985	-0.113384	-0.0576015	-0.208169	-0.176232	-0.15407	-0.15481	0.284636	0.142102	-0.140876	-0.0560716	-0.167743	-0.195321	-0.230963	-0.0075155	-0.114252	-0.209869	-0.148196	0.0242686	-0.178392	-0.121809	0.408909	-0.170845	-0.149797	-0.215632	-0.0042472	0.244331
Faecalibacterium sp. I3333	-0.443795	-0.248373	-0.0327555	-0.0293614	-0.159528	-0.0186334	-0.107894	-0.0264348	-0.045062	-0.0323011	-0.0280205	-0.026111	-0.022443	-0.0225781	-0.0289673	-0.120656	-0.193676	-0.0363219	-0.0886559	0.0208618	-0.237482	-0.0588264	-0.177515	-0.123203	-0.0724087	-0.21407	-0.180117	-0.161326	-0.160546	0.295692	0.13551	-0.149473	-0.0672571	-0.174813	-0.197737	-0.239716	-0.00368665	-0.122286	-0.215303	-0.154802	0.0143184	-0.187578	-0.139355	0.430678	-0.183694	-0.145937	-0.222977	-0.00592038	0.238046
Vescimo1s fastidiosa	-0.689584	-0.338301	0.159981	0.175664	-0.0601296	0.154392	0.0353676	0.168637	0.139672	0.161703	0.166207	0.169653	0.167722	0.172933	0.166876	-0.144895	-0.284064	-0.0150932	0.0310611	0.171967	-0.319326	0.128588	-0.161957	-0.0603422	0.105887	-0.317083	-0.264907	-0.245965	-0.226416	0.304937	-0.0601151	-0.245585	-0.123867	-0.300423	-0.304395	-0.29786	-0.142276	-0.131339	-0.314028	-0.251307	-0.0672121	-0.222022	-0.138329	0.364039	-0.196451	-0.225248	-0.350326	-0.0260173	0.213571
A1erotruncus colihominis	-0.410662	-0.242596	-0.0350778	-0.0373671	-0.156559	-0.0760047	-0.11349	-0.0303412	-0.0512577	-0.0464694	-0.0447514	-0.0285284	-0.0344095	-0.0287213	-0.0312055	-0.118908	-0.0115665	-0.0376253	-0.0957148	-0.0185859	-0.221542	-0.0636531	-0.0859857	-0.119321	-0.0534215	-0.204115	-0.12632	-0.00419763	-0.195138	-0.255507	-0.128757	-0.239811	0.0507031	-0.226352	-0.0283036	-0.160095	-0.0287887	-0.0613565	-0.0997594	-0.156811	-0.113899	-0.175451	-0.19493	-0.0560998	0.00258778	-0.151945	-0.131111	-0.0774263	-0.219015
Dysosmobacter welbionis	-0.668405	-0.386526	0.00510221	0.00882853	-0.208263	-0.00275433	-0.122377	0.0130419	-0.019262	0.00601016	0.00890503	0.0147217	0.0123249	0.0143715	0.0127611	-0.159553	-0.269132	-0.0505402	-0.0974772	0.0284241	-0.367971	-0.031004	-0.224017	-0.156823	-0.0507193	-0.330986	-0.272105	-0.1961	-0.261117	0.207573	-0.0537485	-0.297788	-0.0767073	-0.314647	-0.243674	-0.334362	-0.0695369	-0.162665	-0.285657	-0.249396	-0.0973042	-0.274523	-0.221371	0.424925	-0.195622	-0.223551	-0.32592	-0.0198752	0.0734369
Dysosmobacter sp. Marseille-Q4140	-0.525607	-0.296207	-0.00171409	0.0353137	-0.15802	-0.0293409	-0.0958232	0.00426385	-0.0192856	-0.00552337	0.00706592	0.00677562	0.000538696	0.0071572	0.00419587	-0.161873	-0.23441	0.00304501	-0.078578	-0.0184908	-0.272132	0.0558638	-0.152549	-0.120642	-0.045126	-0.255517	-0.255483	-0.182529	-0.16995	-0.129948	-0.163338	-0.250207	0.0619959	-0.253051	-0.224966	-0.250608	-0.174281	-0.132582	-0.249279	-0.18726	-0.113808	-0.193581	0.27183	-0.0100662	0.0499824	-0.171728	-0.27797	0.206836	-0.151045
Pusillibacter faecalis	-0.757948	-0.406837	0.0789077	0.0889863	-0.158548	0.0444387	-0.0623457	0.0884405	0.0548395	0.070909	0.0766152	0.0904409	0.084299	0.0932016	0.0861375	-0.20425	-0.183827	0.000547608	-0.0443659	0.0989965	-0.377631	0.0444199	-0.171852	-0.123901	0.0290566	-0.366622	-0.265551	-0.163736	-0.29198	0.00150089	-0.132213	-0.347769	-0.0343916	-0.365676	-0.212302	-0.31624	-0.0980433	-0.131367	-0.271202	-0.277324	-0.126144	-0.272078	-0.216695	0.190611	-0.107698	-0.259287	-0.326268	-0.0490686	-0.0443249
Solibaculum mannosilyticum	-0.645475	-0.3622	-0.00214056	0.00869434	-0.198036	-0.0433516	-0.121273	0.00600914	-0.0203107	-0.0119701	-0.00693013	0.00823784	0.00205149	0.00967099	0.00532864	-0.178987	-0.12913	0.0991642	-0.0663247	0.0218921	-0.33842	-0.0126253	-0.11892	-0.119883	-0.0299045	-0.318249	-0.246375	-0.0747935	-0.24848	-0.167412	-0.19018	-0.316417	0.0404117	-0.312173	-0.128658	-0.273362	-0.114711	-0.0885372	-0.201814	-0.215326	-0.119092	-0.22197	-0.17332	0.0378246	-0.0391592	-0.207656	-0.256723	-0.0450031	-0.171305
Hungatella hathewayi	-0.583686	-0.364372	-0.0557045	-0.0522289	-0.238269	-0.0955535	-0.172688	-0.0485033	-0.073647	-0.0625304	-0.0587866	-0.0454834	-0.051572	-0.0475219	-0.0450908	-0.152763	0.182308	-0.0334733	-0.0834668	-0.0392701	-0.362906	-0.0565617	-0.139646	-0.108189	-0.0818933	-0.312405	-0.215565	-0.047385	-0.241628	-0.189282	-0.205916	-0.320273	-0.0176579	-0.289774	-0.0787093	-0.280824	-0.0394071	-0.0688723	-0.152786	-0.173652	-0.119584	-0.18514	-0.191173	0.0354781	-0.0428763	-0.21316	-0.230877	-0.0740734	-0.230262
Clostridium sp. C1	-0.344892	-0.192382	-0.00398545	0.0313501	-0.102672	-0.0276059	-0.0636889	-0.00041464	-0.0155984	-0.00754309	0.0047662	0.00183932	-0.00356723	0.0011551	0.000102181	-0.113374	-0.181418	-0.0132447	-0.0557495	-0.0278806	-0.174619	0.0650549	-0.0933391	-0.0800026	-0.0352517	-0.165435	-0.193988	-0.127513	-0.100647	-0.172593	-0.14482	-0.171721	0.0958695	-0.166083	-0.163737	-0.164846	-0.157552	-0.0920127	-0.176825	-0.118433	-0.0821994	-0.123334	0.34278	-0.102365	0.105264	-0.113851	-0.191759	0.232941	-0.171861
Clostridium sp. DL-VIII	-0.786018	-0.380613	0.00349914	0.0250596	-0.227805	-0.00308353	-0.132422	0.0140336	-0.0211579	0.00403525	0.0186403	0.0147956	0.0115257	0.0184149	0.0126772	-0.19112	-0.300698	0.187134	-0.0858142	0.00436776	-0.382255	-0.00547077	-0.255513	-0.173698	-0.0569916	-0.352978	-0.327534	-0.280383	-0.23099	0.166706	-0.124228	-0.29451	-0.144865	-0.349793	-0.352662	-0.353625	-0.174685	-0.213549	-0.373623	-0.290314	0.0510991	-0.277268	-0.115452	0.326388	-0.21844	-0.212794	-0.40596	-0.033915	0.0943624
Clostridium perfringens	-0.493412	-0.0815498	0.872011	0.874732	0.637303	0.845344	0.763608	0.875507	0.841253	0.869365	0.86846	0.876484	0.875591	0.868763	0.877573	0.0507669	-0.10769	0.313338	0.610839	0.835521	-0.110164	0.802999	0.203962	0.385305	0.80008	-0.183226	-0.236244	-0.221487	-0.160739	0.339573	-0.15345	-0.197323	-0.0500509	-0.225267	-0.265494	-0.0893122	-0.279119	0.0576238	-0.203318	-0.192621	-0.100782	-0.00202539	-0.0359504	-0.0791226	0.0554514	-0.10417	-0.256066	0.0345853	0.309731
Clostridium pasteurianum	-0.827961	-0.304049	0.441768	0.466312	0.157075	0.421037	0.291158	0.452533	0.415988	0.437523	0.454309	0.452958	0.448434	0.458543	0.448883	-0.18082	-0.237102	0.257031	0.250068	0.429708	-0.311404	0.409499	-0.0786063	0.0721021	0.372944	-0.362467	-0.346844	-0.304416	-0.223998	0.277247	-0.182054	-0.285665	-0.118432	-0.369117	-0.387767	-0.292921	-0.264249	-0.122083	-0.363368	-0.30945	0.0873749	-0.200168	-0.102418	0.16671	-0.118547	-0.226827	-0.428479	-0.0246106	0.211474
Clostridiaceae bacterium Marseille-Q4149	-0.512093	-0.139029	0.693549	0.694915	0.473501	0.695262	0.589868	0.698879	0.674089	0.696563	0.696025	0.699179	0.697907	0.698476	0.696776	-0.0522461	-0.182606	0.0140056	0.466479	0.688754	-0.139561	0.624241	0.115724	0.286973	0.627998	-0.208911	-0.216806	-0.210322	-0.157829	0.593364	-0.023073	-0.158544	-0.0450111	-0.207788	-0.249647	-0.122654	-0.145347	0.017067	-0.191215	-0.181568	-0.0778941	-0.0539817	-0.127535	0.308972	-0.029852	-0.1662	-0.252745	0.0963291	0.410086
Paraclostridium bifermentans	-0.341272	-0.191039	-0.0185266	-0.00102295	-0.121504	-0.0420509	-0.0807024	-0.0148607	-0.030468	-0.0200962	-0.020743	-0.0136015	-0.0157508	-0.0133332	-0.0132773	-0.0245533	-0.180524	-0.0194445	-0.0677587	-0.0318595	-0.177651	-0.0186046	-0.104029	-0.0887314	-0.0325564	-0.163068	-0.115681	-0.122806	-0.120484	-0.115665	-0.138132	-0.141176	-0.113979	-0.164171	-0.154933	-0.15577	-0.15578	-0.0572217	-0.182364	-0.131129	-0.0882223	-0.113645	-0.00222849	-0.0654771	-0.124583	-0.112167	-0.184764	-0.113445	-0.0118009
Eubacterium sp. NSJ-61	-0.664568	-0.245852	0.486175	0.514116	0.240124	0.459381	0.359347	0.492678	0.457597	0.483556	0.496651	0.494952	0.489792	0.491835	0.493352	-0.103932	-0.172752	0.0427955	0.279217	0.45558	-0.255822	0.490365	-0.00563559	0.126937	0.412326	-0.296536	-0.330861	-0.262289	-0.19286	0.163033	-0.18529	-0.267629	0.011081	-0.305798	-0.32669	-0.234183	-0.266696	-0.0717377	-0.29862	-0.2417	-0.0434754	-0.143637	0.174911	0.0110392	0.058527	-0.213025	-0.350768	0.18381	0.102702
Eubacterium sp. MSJ-33	-0.633743	-0.332239	-0.0420195	-0.0281273	-0.224868	-0.0361854	-0.150782	-0.0338535	-0.0604137	-0.0369865	-0.0285953	-0.0329144	-0.0342034	-0.0304674	-0.0346007	-0.154537	-0.286538	-0.0264741	-0.114687	-0.028688	-0.32646	-0.0561907	-0.241261	-0.163718	-0.0903111	-0.293676	-0.254472	-0.228226	-0.193844	0.273172	-0.0434685	-0.21537	-0.1208	-0.280262	-0.286853	-0.313924	-0.0974112	-0.181616	-0.303826	-0.233584	0.0110932	-0.247349	-0.128995	0.445801	-0.224832	-0.203307	-0.329075	-0.014583	0.143668
Eubacterium maltosivorans	-0.488793	-0.209062	0.48643	0.486412	0.269279	0.45162	0.373378	0.492647	0.461787	0.478577	0.478782	0.493368	0.490488	0.495761	0.49246	-0.0969463	0.568867	0.100543	0.305044	0.474913	-0.190802	0.426892	0.00986886	0.162159	0.426836	-0.243884	-0.222669	-0.200022	-0.21429	0.125288	-0.157409	-0.248087	-0.106851	-0.243948	-0.207012	-0.163775	-0.138354	-0.0321631	-0.184167	-0.202687	-0.141216	-0.0897018	-0.175173	-0.0339221	0.0174339	-0.153943	-0.259449	-0.0882434	0.105339
Aminipila butyrica	-0.693228	-0.343604	0.0400695	0.0697884	-0.177107	0.00336087	-0.0859659	0.0495425	0.0172234	0.035066	0.0471733	0.0505258	0.0465697	0.0535057	0.0499552	-0.151292	-0.140681	0.539368	-0.0229552	0.0218753	-0.338533	0.0499431	-0.191997	-0.121385	-0.00262921	-0.320357	-0.292015	-0.247858	-0.212578	-0.128052	-0.262257	-0.300467	-0.133305	-0.328961	-0.306812	-0.312248	-0.263132	-0.172423	-0.33596	-0.261806	-0.0477616	-0.21643	-0.0188295	-0.0321947	-0.116571	-0.137286	-0.371493	-0.108362	-0.0716218
Intestinimo1s butyriciproducens	-0.59763	-0.342849	-0.0257577	-0.0204283	-0.203138	-0.0534046	-0.134662	-0.0183591	-0.0427528	-0.0320749	-0.0287373	-0.0164437	-0.0217533	-0.0151106	-0.0195116	-0.174459	-0.142135	-0.0339824	-0.0928648	0.00517251	-0.31669	-0.0452896	-0.127302	-0.133591	-0.0546096	-0.291403	-0.242431	-0.0707175	-0.235355	-0.0405866	-0.135812	-0.281445	0.0588877	-0.28346	-0.125378	-0.260843	-0.0805523	-0.0980697	-0.191314	-0.204443	-0.116038	-0.231018	-0.20321	0.182254	-0.0592141	-0.209041	-0.237635	-0.0112087	-0.110975
Lawsonibacter asaccharolyticus	-0.491354	-0.290089	-0.014437	-0.0125302	-0.166982	-0.0563603	-0.109429	-0.00833554	-0.0306386	-0.0254242	-0.0232908	-0.00644771	-0.0127743	-0.00507096	-0.00941388	-0.149383	0.0248547	-0.0303497	-0.0794613	0.00849225	-0.266102	-0.0387809	-0.091976	-0.113205	-0.0344617	-0.251943	-0.182827	-0.0271954	-0.216897	-0.214848	-0.161625	-0.269812	0.0507095	-0.253368	-0.0627852	-0.202832	-0.0632902	-0.0654063	-0.13408	-0.17578	-0.122067	-0.191289	-0.203928	-0.0181601	-0.00827488	-0.180419	-0.179293	-0.0728421	-0.197875
Massilistercora timonensis	-0.374302	-0.214647	-0.0296544	0.00662235	-0.135064	-0.0546611	-0.094799	-0.0258156	-0.0425387	-0.0329746	-0.0208074	-0.023403	-0.0289783	-0.0243354	-0.0249595	-0.115726	-0.198795	-0.0232867	-0.0806805	-0.0538565	-0.197018	0.040201	-0.114108	-0.101863	-0.0618112	-0.181086	-0.204552	-0.137712	-0.112746	-0.186687	-0.154805	-0.186425	0.0834952	-0.18165	-0.176115	-0.1848	-0.165194	-0.102763	-0.194402	-0.130603	-0.0907295	-0.139614	0.338511	-0.0968009	0.0866707	-0.125211	-0.208256	0.220215	-0.180507
Romboutsia ilealis	-0.720783	-0.349047	-0.0624982	-0.0447467	-0.281282	-0.0837544	-0.192965	-0.0515956	-0.086945	-0.0646376	-0.0484146	-0.0515468	-0.0537909	-0.047096	-0.0517427	-0.189457	-0.0543545	0.660738	-0.0940876	-0.0646713	-0.371166	-0.0736703	-0.279998	-0.186162	-0.108146	-0.336274	-0.317388	-0.265266	-0.209964	-0.015429	-0.215747	-0.292426	-0.19424	-0.346829	-0.329416	-0.363974	-0.205277	-0.240022	-0.354521	-0.285806	0.0957468	-0.260723	-0.198499	0.169908	-0.214848	-0.12505	-0.39566	-0.191339	-0.0352434
Clostridiales bacterium CC110	-0.84874	-0.423127	0.195515	0.217289	-0.0830171	0.175743	0.0366221	0.206551	0.170241	0.191743	0.202661	0.208267	0.203604	0.212711	0.203383	-0.22654	-0.268036	0.0135716	0.0364001	0.213849	-0.407693	0.173906	-0.188226	-0.0787229	0.126834	-0.409936	-0.354356	-0.271695	-0.28774	0.221791	-0.102286	-0.348068	-0.0748329	-0.385323	-0.340432	-0.37371	-0.163213	-0.160045	-0.363474	-0.30466	-0.0605244	-0.279796	-0.110069	0.328023	-0.144687	-0.282916	-0.42304	0.0322796	0.127997
Vallitalea pronyensis	-0.816633	-0.407659	0.101841	0.134088	-0.156105	0.0827202	-0.0460898	0.112612	0.0770942	0.0996174	0.114573	0.114004	0.109828	0.117863	0.110959	-0.211398	-0.305345	0.20507	-0.0200159	0.0995506	-0.388629	0.109826	-0.215913	-0.127895	0.0367264	-0.383891	-0.381818	-0.276256	-0.25662	0.137685	-0.172824	-0.330829	-0.0793387	-0.356062	-0.378115	-0.372983	-0.236969	-0.204747	-0.392803	-0.27449	-0.0329926	-0.268279	0.00537008	0.300772	-0.140048	-0.231922	-0.43373	0.0550048	0.0601928
Symbiobacterium thermophilum	-0.504237	-0.277234	-0.0341765	-0.0295268	-0.179523	-0.0186675	-0.121267	-0.02755	-0.0479907	-0.0278779	-0.0242793	-0.0271467	-0.0272793	-0.024839	-0.0288221	-0.137288	-0.230592	-0.0312038	-0.090694	-0.0130329	-0.261514	-0.0575265	-0.200656	-0.130845	-0.0764645	-0.230367	-0.206745	-0.182455	-0.168418	0.35488	0.0174477	-0.168164	-0.0821051	-0.214927	-0.225998	-0.256596	-0.0365015	-0.154841	-0.237293	-0.188269	-0.0358072	-0.210109	-0.167423	0.512939	-0.201342	-0.161124	-0.258573	0.0151152	0.171818
Staphylococcus epidermidis	-0.335474	-0.185008	-0.0167243	0.00084286	-0.118834	-0.0401155	-0.0780473	-0.0131226	-0.0286334	-0.0184409	-0.018851	-0.0118829	-0.014101	-0.0116214	-0.0115634	-0.0234691	-0.180065	-0.027049	-0.0661464	-0.030469	-0.175143	-0.0162133	-0.101361	-0.0874773	-0.0303964	-0.156212	-0.115561	-0.121101	-0.118738	-0.12027	-0.138806	-0.138653	-0.110588	-0.162221	-0.153367	-0.151993	-0.155613	-0.0551126	-0.179802	-0.129737	-0.0799418	-0.111521	0.00126466	-0.0739053	-0.122463	-0.104385	-0.182731	-0.111929	-0.0131385
Bacillus subtilis	-0.652394	-0.198452	0.719283	0.741136	0.456118	0.68704	0.591099	0.727359	0.699793	0.713173	0.718833	0.72813	0.722107	0.732481	0.723282	-0.112495	-0.169751	0.0867163	0.47318	0.698922	-0.189405	0.670776	0.120949	0.278123	0.661266	-0.281267	-0.235487	-0.226727	-0.188769	0.294844	-0.170123	-0.22791	-0.0681133	-0.291287	-0.272795	-0.144669	-0.236019	0.0222922	-0.23004	-0.22516	-0.0681795	-0.0660134	-0.0386047	-0.00490148	0.0231186	-0.204412	-0.310847	0.0360052	0.270966
Geobacillus sp. JS12	-0.147558	-0.170477	-0.0177897	-0.0138177	-0.124848	-0.0407419	-0.082775	-0.0136328	-0.0295831	-0.0229695	-0.0238495	-0.0136467	-0.0170365	-0.00726521	-0.0136831	-0.128206	0.689823	-0.0278555	-0.0517625	-0.0173671	-0.179539	-0.0344661	-0.125404	-0.0693819	-0.0407908	-0.130818	-0.183562	-0.132755	-0.12945	-0.104983	-0.169116	-0.166491	-0.127511	-0.127876	-0.108224	-0.15921	-0.0646497	-0.0906785	-0.113503	-0.101906	-0.0667073	-0.0954753	-0.103989	-0.0478919	-0.0152085	0.0492396	-0.175925	-0.0819836	-0.0719825
Geobacillus zalihae	-0.153058	-0.162832	-0.0138592	-0.0174942	-0.11481	-0.0399173	-0.0858203	-0.0108057	-0.0343602	-0.0178717	-0.0197884	-0.0101376	-0.0125627	-0.00966782	-0.00763982	-0.068862	0.71192	-0.0267112	-0.0621857	-0.0242242	-0.205539	-0.0405947	-0.150101	-0.0831448	-0.0481802	-0.115399	-0.212609	-0.153153	-0.15084	-0.135693	-0.193296	-0.192886	-0.152407	-0.153404	-0.136799	-0.187886	-0.0954769	-0.116086	-0.14658	-0.126768	-0.0750597	-0.120049	-0.131113	-0.0659948	-0.0471756	0.0514689	-0.195527	-0.125245	-0.10503
Geobacillus stearothermophilus	-0.15685	-0.177702	-0.0212977	-0.0169158	-0.131972	-0.045131	-0.0888812	-0.0170498	-0.0336561	-0.0265787	-0.0273603	-0.0170157	-0.0205696	-0.0106047	-0.0171177	-0.132501	0.681752	-0.0276473	-0.0565878	-0.0210181	-0.186708	-0.0378199	-0.13145	-0.0746638	-0.0452253	-0.137961	-0.189565	-0.137132	-0.134605	-0.108973	-0.172555	-0.172567	-0.128125	-0.133836	-0.113063	-0.166521	-0.0683493	-0.0952563	-0.119524	-0.107447	-0.0711272	-0.101798	-0.10398	-0.0461026	-0.0162952	0.0459227	-0.182912	-0.0802983	-0.0772343
Anoxybacillus gonensis	-0.116747	-0.174345	-0.0326434	-0.0276455	-0.14428	-0.0554728	-0.100473	-0.0283987	-0.045118	-0.0379133	-0.0399005	-0.0284303	-0.0319636	-0.0218064	-0.0286284	-0.137731	0.610239	-0.0257603	-0.0660975	-0.0331589	-0.192796	-0.0513497	-0.130677	-0.0807191	-0.0574123	-0.122662	-0.191701	-0.143333	-0.135043	-0.118887	-0.178537	-0.173834	-0.135545	-0.13162	-0.104281	-0.166484	-0.0675252	-0.0922647	-0.111526	-0.103288	-0.0626658	-0.100857	-0.106889	-0.0538934	-0.016084	0.112648	-0.182448	-0.0557166	-0.0771121
Anoxybacillus flavithermus	-0.131167	-0.177297	1.46404e-05	0.00554258	-0.12055	-0.0229452	-0.0718905	0.00454953	-0.0131798	-0.00554622	-0.00769212	0.00448148	0.00084194	0.0113483	0.00403948	-0.14158	0.590156	-0.0204059	-0.043539	-0.00125906	-0.195906	-0.0218059	-0.122641	-0.0667215	-0.027605	-0.125401	-0.198637	-0.15281	-0.142605	-0.0996558	-0.179844	-0.179332	-0.136945	-0.139543	-0.112992	-0.167731	-0.0741855	-0.0898412	-0.117238	-0.110601	-0.0652851	-0.101003	-0.111069	-0.0513017	-0.0146917	0.121527	-0.192023	-0.0470557	-0.0592525
Paenibacillus sp. H1-7	-0.551469	-0.309381	-0.0463374	-0.0388354	-0.208445	-0.036726	-0.144332	-0.0391065	-0.0624826	-0.0407648	-0.0361301	-0.0384482	-0.0399492	-0.0361321	-0.040145	-0.15501	-0.230221	-0.0227001	-0.107964	-0.0339438	-0.291809	-0.0663939	-0.224211	-0.150725	-0.0925879	-0.255092	-0.223222	-0.20048	-0.189025	0.306176	-0.0228303	-0.201253	-0.0955292	-0.24701	-0.241836	-0.2802	-0.0497914	-0.171657	-0.25833	-0.211918	-0.050707	-0.231049	-0.160302	0.484406	-0.201626	-0.167261	-0.285779	0.0140915	0.12525
Paenibacillus ihbetae	-0.623458	-0.287106	0.253853	0.264828	0.0447334	0.25819	0.138922	0.26192	0.236293	0.257222	0.261876	0.26241	0.260301	0.265959	0.259094	-0.153394	-0.244648	0.00619647	0.117133	0.260912	-0.26813	0.217975	-0.118428	0.0101793	0.194699	-0.279404	-0.238763	-0.238179	-0.202435	0.438008	-0.0166485	-0.215388	-0.0988972	-0.266108	-0.28204	-0.25229	-0.0917261	-0.115219	-0.270405	-0.228797	-0.0711984	-0.185083	-0.135365	0.440891	-0.152531	-0.198413	-0.316641	0.0491422	0.258368
Paenibacillus yonginensis	-0.566915	-0.287067	-0.0283219	-0.0224928	-0.173148	-0.0150554	-0.110851	-0.0205678	-0.0421762	-0.0235189	-0.0203318	-0.0206485	-0.0206315	-0.0163423	-0.0240623	-0.155804	-0.183991	-0.027101	-0.104472	0.000609761	-0.258744	-0.0581446	-0.195069	-0.127986	-0.0638852	-0.259982	-0.194017	-0.163624	-0.114153	0.33114	0.0276636	-0.177271	-0.0879907	-0.229378	-0.228045	-0.266097	0.00432249	-0.156564	-0.246928	-0.222923	-0.0129218	-0.212141	-0.151466	0.495856	-0.166748	-0.192586	-0.231317	0.0166548	0.226752
Brevibacillus laterosporus	-0.609792	-0.256563	0.343401	0.358563	0.134051	0.356639	0.231343	0.352197	0.336094	0.348364	0.354696	0.352672	0.349682	0.356662	0.350234	-0.152785	-0.221663	-0.00098278	0.245094	0.352148	-0.256319	0.337149	-0.00198044	0.125376	0.295825	-0.266819	-0.257853	-0.184493	-0.163882	0.516403	-0.0441665	-0.198445	-0.0581765	-0.201157	-0.235927	-0.209974	-0.0869314	-0.0183234	-0.215234	-0.155103	-0.0232284	-0.0899385	-0.0939593	0.408716	-0.111425	-0.191175	-0.28929	0.131663	0.294217
Brevibacillus brevis	-0.676387	-0.368409	0.218617	0.25589	0.00263718	0.206998	0.095324	0.231111	0.235393	0.219501	0.230056	0.232622	0.229484	0.237278	0.233931	-0.199905	-0.0217731	0.739166	0.33568	0.216685	-0.340879	0.332843	0.0518024	0.232265	0.222944	-0.33855	-0.212959	-0.0655376	-0.130289	0.2247	-0.18488	-0.279002	-0.0715711	-0.159016	-0.106718	-0.275294	0.028656	0.115633	-0.144743	-0.0654967	-0.110977	0.0623544	0.0953172	0.0355679	-0.0600681	-0.117767	-0.253825	0.107537	0.0581663
Streptococcus vestibularis	-0.338238	-0.19692	-0.0316371	-0.0149935	-0.128805	-0.0581598	-0.0973314	-0.0280405	-0.0444208	-0.0336599	-0.0346573	-0.0266007	-0.0290126	-0.0267575	-0.0261351	-0.0203231	-0.14	-0.0294975	-0.0803999	-0.0466274	-0.190021	-0.0321526	-0.116798	-0.0986809	-0.0469078	-0.158761	-0.126433	-0.12624	-0.129153	-0.139291	-0.152615	-0.156698	-0.125536	-0.172306	-0.16003	-0.168174	-0.162253	-0.0657635	-0.192975	-0.137044	-0.101039	-0.122558	-0.0120161	-0.0789126	-0.134307	-0.107806	-0.193116	-0.133837	-0.0335468
Streptococcus sp. HSISM1	-0.738535	-0.341542	0.0225224	0.0316141	-0.205621	-0.0149809	-0.120639	0.0317117	-0.0147046	0.0180345	0.0315549	0.0330241	0.0303748	0.0299238	0.0359055	-0.097424	0.0667157	0.469635	-0.0639403	-0.00114829	-0.405491	-0.00588214	-0.258011	-0.166048	-0.0351069	-0.325968	-0.345535	-0.275703	-0.248659	-0.139181	-0.294479	-0.341368	-0.213426	-0.389713	-0.341827	-0.368462	-0.259796	-0.221772	-0.380954	-0.318451	0.0809524	-0.272195	-0.22473	-0.00225391	-0.219068	-0.129234	-0.402645	-0.252	-0.0951077
Streptococcus sp. LPB0220	-0.751274	-0.352224	-0.028523	-0.0192973	-0.259668	-0.0632309	-0.169708	-0.0191198	-0.0651882	-0.0322088	-0.0168565	-0.0179069	-0.0206199	-0.0206774	-0.0149559	-0.1131	0.0625767	0.484968	-0.0991064	-0.0493926	-0.411454	-0.0523188	-0.278141	-0.193588	-0.0838864	-0.339939	-0.343074	-0.266956	-0.242511	-0.146223	-0.29004	-0.336896	-0.206987	-0.389354	-0.335815	-0.374453	-0.242121	-0.233542	-0.376889	-0.315519	0.113601	-0.280165	-0.228305	0.0262856	-0.220411	-0.138486	-0.40059	-0.248637	-0.111507
Streptococcus sp. HSISS3	-0.478101	-0.259332	0.110677	0.123681	-0.049298	0.0677892	0.00488269	0.116143	0.0886039	0.104951	0.104217	0.118034	0.113665	0.117781	0.118512	-0.0524077	0.16243	-0.0298478	0.00561382	0.0935536	-0.269525	0.088822	-0.118384	-0.0534342	0.0765875	-0.230713	-0.220282	-0.176046	-0.205328	-0.146354	-0.231179	-0.255474	-0.1545	-0.259169	-0.216177	-0.232969	-0.207067	-0.0837849	-0.248054	-0.2032	-0.146415	-0.158897	-0.0918341	-0.115173	-0.116617	-0.154621	-0.27657	-0.180609	-0.0509394
Streptococcus sp. HSISS2	-0.496781	-0.249108	0.210094	0.224238	0.0259467	0.172127	0.107232	0.215524	0.191008	0.205609	0.205598	0.217243	0.213189	0.217253	0.217853	-0.0538067	0.158312	-0.0146917	0.0996885	0.194291	-0.242094	0.191489	-0.0574136	0.023627	0.178222	-0.253495	-0.202358	-0.160628	-0.183409	-0.0625039	-0.213192	-0.233165	-0.134983	-0.236646	-0.199084	-0.201034	-0.188421	-0.0349024	-0.217132	-0.178813	-0.119502	-0.111402	-0.0676356	-0.105551	-0.0805778	-0.178907	-0.258696	-0.137474	0.0150156
Streptococcus gordonii	-0.656852	-0.108584	0.428518	0.433421	0.191523	0.414351	0.313582	0.436415	0.393081	0.425331	0.454615	0.43678	0.436501	0.431882	0.438485	-0.0476197	-0.171881	0.396087	0.262384	0.401186	-0.243129	0.384689	-0.0395294	0.0869601	0.361152	-0.256255	-0.311466	-0.247154	-0.107368	0.113208	-0.194738	-0.187207	-0.131638	-0.320929	-0.327397	-0.222267	-0.251019	-0.109295	-0.28977	-0.262216	0.495231	-0.139299	-0.166697	-0.0367544	-0.100928	-0.0990149	-0.327499	-0.10694	0.141956
Streptococcus anginosus	-0.377986	-0.19641	-0.00458665	0.0117668	-0.115738	-0.0315795	-0.0767594	-0.00048132	-0.0201066	-0.00677325	-0.00554928	0.000882297	-0.00123413	-6.32072e-05	0.00170466	-0.0192299	-0.172895	0.0602603	-0.0600751	-0.0222093	-0.203435	-0.00823024	-0.119711	-0.0929917	-0.0245674	-0.170473	-0.14755	-0.143524	-0.132908	-0.135485	-0.165213	-0.167399	-0.133342	-0.193066	-0.183552	-0.182456	-0.182856	-0.0774366	-0.213379	-0.155443	-0.0627398	-0.131101	-0.0249996	-0.0843026	-0.141974	-0.103191	-0.213479	-0.143544	-0.0275029
Streptococcus intermedius	-0.330943	-0.161719	-0.00956447	-0.00155171	-0.114337	-0.0277696	-0.0734793	-0.00374682	-0.023435	-0.0132613	-0.00841206	-0.00463891	-0.00309411	-0.00363951	-0.00294311	-0.0739978	-0.0197	0.992351	0.0191185	-0.0132265	-0.172138	-0.0112749	-0.119079	-0.0641279	-0.0299257	-0.132066	-0.171665	-0.141456	-0.111938	-0.0897065	-0.148879	-0.177347	-0.0860359	-0.159788	-0.166782	-0.17997	-0.157524	-0.13345	-0.182896	-0.141887	-0.0430118	-0.104317	-0.105278	-0.0208358	-0.0798633	0.0679109	-0.194008	-0.137358	-0.0681316
Streptococcus mitis	-0.718642	-0.269285	0.100275	0.10722	-0.109695	0.0942254	-0.0228521	0.108576	0.0662787	0.103346	0.119111	0.109479	0.109104	0.104822	0.11189	-0.066357	-0.282176	0.307255	-0.00647153	0.0821876	-0.343701	0.0684983	-0.215478	-0.11556	0.0375672	-0.286705	-0.312305	-0.279539	-0.193255	0.173661	-0.154704	-0.237465	-0.162732	-0.349419	-0.356155	-0.319347	-0.220403	-0.202527	-0.367299	-0.295065	0.186861	-0.250249	-0.201887	0.243202	-0.25391	-0.145609	-0.366994	-0.121353	0.103997
Streptococcus mutans	-0.51378	-0.251182	0.105181	0.129814	-0.0588036	0.0692503	0.00462662	0.110625	0.0831789	0.101673	0.106852	0.112731	0.108603	0.111295	0.112967	-0.0531526	-0.135679	0.0102652	-0.000848669	0.0784551	-0.261562	0.109333	-0.119474	-0.0629926	0.0674392	-0.234405	-0.228798	-0.199877	-0.174412	-0.131711	-0.222211	-0.23286	-0.114888	-0.263003	-0.250925	-0.23399	-0.242385	-0.0944468	-0.272829	-0.205614	-0.0761981	-0.16181	0.0544954	-0.112397	-0.09355	-0.152628	-0.291416	-0.0736811	-0.038016
Streptococcus sanguinis	-0.569198	-0.10388	0.0915522	0.0978526	-0.0735331	0.0946408	-0.00102194	0.0992641	0.0700858	0.0930904	0.13002	0.0996473	0.0961977	0.0988108	0.0989455	-0.113913	-0.268222	0.0416809	0.00464927	0.0739329	-0.253573	0.0740299	-0.164374	-0.083234	0.0452384	-0.238947	-0.272185	-0.185962	-0.0462566	0.0992055	-0.152946	-0.133131	-0.155334	-0.2852	-0.284584	-0.245116	-0.143753	-0.166509	-0.265421	-0.222522	0.638652	-0.184457	-0.176635	0.149087	-0.183273	-0.16289	-0.296325	-0.122898	0.0549461
Streptococcus oralis	-0.729372	-0.260065	0.264824	0.274274	0.0279957	0.246903	0.130306	0.272831	0.229827	0.26524	0.280337	0.274051	0.272617	0.269163	0.275877	-0.0541721	-0.263396	0.284559	0.115073	0.239423	-0.332958	0.224919	-0.143813	-0.0231454	0.198304	-0.299494	-0.327686	-0.284887	-0.200605	0.147319	-0.207067	-0.265491	-0.177984	-0.356968	-0.36308	-0.306372	-0.265175	-0.154994	-0.363357	-0.296058	0.168122	-0.216075	-0.171872	0.122561	-0.205845	-0.156475	-0.385697	-0.13277	0.123055
Streptococcus lactarius	-0.74394	-0.214428	0.383937	0.402293	0.125684	0.354802	0.249501	0.394567	0.359915	0.376278	0.401692	0.394644	0.389465	0.400204	0.391376	-0.162822	-0.0630856	0.29834	0.22241	0.370778	-0.286074	0.348661	-0.0643559	0.0574268	0.331554	-0.330961	-0.318009	-0.243694	-0.157558	0.0797734	-0.232167	-0.245579	-0.147483	-0.34621	-0.326993	-0.253685	-0.249303	-0.107653	-0.30971	-0.277407	0.322184	-0.165604	-0.173687	-0.0225804	-0.104928	-0.194409	-0.369647	-0.145653	0.113645
Lactococcus lactis	-0.021545	-0.000340576	-0.0309484	-0.0320615	0.0436445	-0.0634209	-0.0983132	-0.0272686	-0.0431944	-0.0396456	-0.0401254	-0.026023	-0.0304645	-0.0257034	-0.0282275	-0.00131886	0.0817782	-0.0108668	-0.0784912	-0.0540758	-0.189153	-0.0529795	-0.156507	-0.0973247	-0.0620513	0.12026	-0.199894	-0.147069	-0.14795	-0.189299	-0.170347	-0.182573	-0.174162	-0.169564	-0.175604	-0.192119	-0.188504	-0.155177	-0.204338	-0.152357	-0.103297	-0.156276	-0.174273	-0.104517	-0.195069	0.139493	-0.198045	-0.216304	-0.182658
Lactococcus cremoris	-0.0994182	-0.0436003	0.00369594	0.00167	0.04147	-0.0346129	-0.0812443	0.00808133	-0.0135937	-0.00550485	-0.00556116	0.00956404	0.00461578	0.00939338	0.00808884	-0.0132068	0.239526	-0.0168315	-0.0633113	-0.0216994	-0.231227	-0.0248831	-0.174505	-0.0950386	-0.0357303	0.0700016	-0.244076	-0.176678	-0.180242	-0.195975	-0.20945	-0.224883	-0.197364	-0.209499	-0.208767	-0.2293	-0.209482	-0.170418	-0.237224	-0.183305	-0.114109	-0.177362	-0.199183	-0.112525	-0.196307	0.104594	-0.24159	-0.243052	-0.188786
Lactococcus garvieae	-0.117764	-0.0185014	0.0880684	0.0896065	0.123804	0.054969	0.00322873	0.092984	0.0732136	0.0786393	0.0806099	0.0941352	0.0892942	0.0955644	0.0909134	-0.0225043	0.0528576	0.000356691	0.00160832	0.065383	-0.20899	0.0581506	-0.137085	-0.0503259	0.0464869	0.0807865	-0.242837	-0.185405	-0.168513	-0.10894	-0.175921	-0.206272	-0.178521	-0.208243	-0.225259	-0.211544	-0.221462	-0.154715	-0.241662	-0.185939	-0.0775141	-0.165364	-0.181944	-0.0784401	-0.193879	0.108624	-0.246374	-0.201192	-0.114753
Limosilactobacillus oris	-0.422092	-0.280537	-0.0509698	-0.0507346	-0.192993	-0.0965738	-0.147837	-0.0450039	-0.0705949	-0.0620859	-0.0589874	-0.043529	-0.0497915	-0.0403911	-0.0447832	-0.143701	0.545593	-0.0486515	-0.11408	-0.0556478	-0.269711	-0.0783055	-0.197393	-0.140175	-0.0844356	-0.241688	-0.144565	-0.116336	-0.22194	-0.264397	-0.155776	-0.280119	-0.143411	-0.250857	-0.113842	-0.219136	-0.0151096	-0.124468	-0.165278	-0.188727	-0.137644	-0.182659	-0.183999	-0.0893304	-0.0624686	-0.166813	-0.20967	-0.193762	-0.201121
Lactobacillus delbrueckii	-0.612917	-0.301821	0.187583	0.194184	-0.0189937	0.141992	0.0678949	0.19598	0.170662	0.174979	0.185215	0.197808	0.190093	0.201936	0.194091	-0.178079	0.210003	-0.0342023	0.0791316	0.190181	-0.29023	0.158773	-0.0840179	-0.00688718	0.148629	-0.313656	-0.151738	-0.100963	-0.235179	-0.135617	-0.143424	-0.305205	-0.0903755	-0.295537	-0.116719	-0.207891	-0.0256714	-0.043765	-0.157144	-0.204359	-0.0522655	-0.151877	-0.188629	-0.0720791	-0.0148529	-0.240094	-0.235997	-0.115167	-0.0959699
Lactobacillus gasseri	-0.521024	-0.302573	0.128821	0.153324	-0.0650675	0.084563	0.0161566	0.136031	0.112494	0.121269	0.127892	0.138044	0.130431	0.142657	0.136649	-0.174265	0.507074	-0.0452166	0.0406752	0.117296	-0.288239	0.150143	-0.112027	-0.0202691	0.0913097	-0.297801	-0.260431	-0.171338	-0.202022	-0.151668	-0.24691	-0.284198	-0.0617294	-0.259852	-0.198084	-0.244449	-0.156324	-0.0827427	-0.215276	-0.182777	-0.149454	-0.139571	0.0593449	-0.117324	0.0359317	-0.207558	-0.28906	-0.00762697	-0.134625
Lactobacillus crispatus	-0.383027	-0.233452	-0.0331473	-0.015604	-0.152174	-0.0650649	-0.111639	-0.0284849	-0.0470494	-0.0364305	-0.0368628	-0.027043	-0.0303762	-0.0254071	-0.0266263	-0.053391	0.0706626	-0.0352602	-0.0837643	-0.0462278	-0.225161	-0.0333097	-0.139544	-0.105241	-0.0510084	-0.195843	-0.159876	-0.143915	-0.15263	-0.160648	-0.185658	-0.189093	-0.145638	-0.196497	-0.176672	-0.199046	-0.166519	-0.0806452	-0.209881	-0.153464	-0.117789	-0.135848	-0.0310306	-0.0879564	-0.128801	-0.13135	-0.224617	-0.157574	-0.0564057
Lactiplantibacillus plantarum	-0.24019	-0.0581847	-0.00903529	-0.0208058	-0.135573	-0.0340687	-0.0938216	-0.00336666	-0.0520224	-0.0138093	-0.0161964	-0.00284207	-0.00287528	-0.0123362	0.00496751	0.00235811	0.245858	0.225287	-0.0890522	-0.0474499	-0.282352	-0.0574329	-0.180879	-0.145407	-0.0621807	-0.0577687	-0.251429	-0.234343	-0.208063	-0.264784	-0.215567	-0.165458	-0.129086	-0.223371	-0.214991	-0.232373	-0.189087	-0.188192	-0.193311	-0.246018	-0.0557113	-0.190863	-0.210993	-0.132141	-0.130134	0.113896	-0.220335	-0.102784	-0.182959
Leuconostoc gelidum	-0.346349	-0.173389	-0.0173801	0.000279628	-0.115088	-0.0419146	-0.084039	-0.0131144	-0.0306232	-0.0199769	-0.0176567	-0.0118544	-0.0142124	-0.0112623	-0.0118295	-0.0283789	-0.185436	-0.0315772	-0.0724905	-0.033516	-0.189828	-0.0188905	-0.115921	-0.0973136	-0.034463	-0.146349	-0.136588	-0.136235	-0.120436	-0.139368	-0.154504	-0.14522	-0.127502	-0.180784	-0.173407	-0.169072	-0.172561	-0.0712418	-0.198418	-0.147299	-0.0267103	-0.126237	-0.0218792	-0.0885523	-0.141339	-0.089434	-0.201894	-0.13289	-0.0255046
Ligilactobacillus salivarius	-0.399411	-0.273453	-0.0382022	-0.0270449	-0.175896	-0.0792137	-0.135517	-0.0325141	-0.0575802	-0.0440469	-0.043765	-0.0309498	-0.0353752	-0.0285931	-0.0300262	-0.0899622	0.452401	-0.0462636	-0.0958691	-0.0497717	-0.274536	-0.0481804	-0.186532	-0.123734	-0.0677185	-0.22842	-0.211589	-0.171009	-0.197698	-0.205949	-0.225478	-0.247909	-0.172768	-0.213023	-0.1939	-0.246576	-0.154881	-0.126593	-0.229054	-0.184394	-0.14169	-0.168963	-0.112263	-0.0989062	-0.119653	-0.146773	-0.263979	-0.214153	-0.127387
Lacticaseibacillus rhamnosus	-0.323332	-0.180717	0.00225214	-0.00521606	-0.0895401	-0.0158564	-0.044965	0.00422555	-0.0342536	-0.000282129	-0.00345128	0.00363723	0.0106174	-0.00730126	0.0124754	0.103451	-0.0142044	0.895733	-0.0138741	-0.0208907	-0.186905	-0.0237479	-0.0973855	-0.0969863	-0.0264167	-0.0900174	-0.11763	-0.168075	-0.13323	-0.0923282	-0.153391	-0.168786	-0.0731901	-0.152561	-0.134062	-0.131498	-0.165776	-0.127194	-0.176353	-0.154236	-0.0924342	-0.110179	-0.111814	-0.0851314	-0.100509	0.146041	-0.109449	-0.100948	-0.0476747
Granulicatella adiacens	-0.403615	-0.163239	-0.0262292	-0.017746	-0.150462	-0.0407667	-0.0969385	-0.0194965	-0.0423598	-0.0294112	-0.0161528	-0.0204285	-0.0192302	-0.0195072	-0.0188024	-0.0926069	-0.0679483	0.958491	-0.0021478	-0.0308551	-0.199209	-0.0272679	-0.146664	-0.0899961	-0.0503859	-0.167657	-0.199728	-0.154604	-0.0970162	-0.0838452	-0.159961	-0.176545	-0.102331	-0.191149	-0.195668	-0.205815	-0.159967	-0.157352	-0.208501	-0.164335	0.119317	-0.127718	-0.125583	0.00256146	-0.103332	0.0366908	-0.221642	-0.150572	-0.0641834
Faecalibacillus intesti1lis	-0.412189	-0.272538	-0.037098	-0.0326236	-0.183588	-0.0714294	-0.135887	-0.0315971	-0.0592805	-0.0406918	-0.0395974	-0.030127	-0.0339532	-0.0292943	-0.0280982	-0.0944325	0.613887	-0.0405712	-0.0958399	-0.0469577	-0.288757	-0.0556505	-0.203858	-0.122782	-0.0728429	-0.23395	-0.227503	-0.175068	-0.196437	-0.139803	-0.218193	-0.249613	-0.181799	-0.241454	-0.193862	-0.258909	-0.123101	-0.142467	-0.221484	-0.185321	-0.113704	-0.174276	-0.138147	-0.0117667	-0.109279	-0.144149	-0.265689	-0.195056	-0.113318
Amedibacterium intesti1le	-0.68157	-0.172955	0.833723	0.841909	0.548569	0.807087	0.697247	0.840478	0.805668	0.829836	0.838031	0.842074	0.837582	0.838549	0.840262	-0.058701	-0.122222	0.0721889	0.565654	0.81226	-0.204651	0.773826	0.159676	0.346323	0.759355	-0.293078	-0.276235	-0.214033	-0.192844	0.369299	-0.157367	-0.247555	-0.0400513	-0.302985	-0.272434	-0.15654	-0.225412	0.0444692	-0.221221	-0.226321	0.01255	-0.0525454	-0.0814672	0.0302623	0.0459237	-0.223913	-0.310281	0.0675614	0.288118
Catenibacterium sp. co_0103	-0.592169	-0.311297	0.044145	0.081754	-0.140897	0.0103361	-0.066685	0.0514444	0.0218484	0.0390352	0.0536083	0.0534353	0.047927	0.0542265	0.0520417	-0.16659	-0.0883088	0.274389	-0.0327187	0.0214759	-0.303645	0.0968313	-0.171143	-0.106721	-0.0061769	-0.279971	-0.317338	-0.232071	-0.190297	-0.147087	-0.226204	-0.287386	0.015486	-0.286051	-0.287133	-0.289383	-0.24169	-0.16494	-0.304569	-0.224154	-0.0959903	-0.204585	0.234614	-0.055347	0.0297256	-0.145118	-0.338242	0.134736	-0.152122
Turicibacter sp. H121	-0.429463	-0.26116	-0.000177418	-0.000713706	-0.155978	-0.0355288	-0.103362	0.00612269	-0.0249752	-0.00635733	-0.00272886	0.00693713	0.00384086	0.00848516	0.00845631	-0.118033	0.692355	0.191621	-0.0602789	-0.00092609	-0.286695	-0.0295845	-0.198397	-0.113225	-0.0412626	-0.2342	-0.265291	-0.179856	-0.205819	-0.134506	-0.214146	-0.268069	-0.149034	-0.25332	-0.20473	-0.266365	-0.131869	-0.166517	-0.229442	-0.203776	-0.081719	-0.187732	-0.194403	-0.00442785	-0.0834368	-0.111711	-0.274081	-0.203731	-0.121398
Turicibacter sanguinis	-0.401964	-0.22866	-0.0245176	-0.00645074	-0.145959	-0.0476259	-0.0979403	-0.0200225	-0.0381765	-0.0255692	-0.0260398	-0.0187457	-0.0209487	-0.0180482	-0.0185308	-0.0430212	-0.167188	-0.000751125	-0.0781649	-0.0353598	-0.211156	-0.0268304	-0.129791	-0.104443	-0.0432453	-0.193518	-0.143555	-0.144643	-0.141935	-0.0827093	-0.143364	-0.166724	-0.125606	-0.190333	-0.181796	-0.188813	-0.161193	-0.0775933	-0.211767	-0.153922	-0.102883	-0.138116	-0.0221412	-0.0125507	-0.144191	-0.130025	-0.216815	-0.117867	0.0016252
Phascolarctobacterium faecium	-0.337403	-0.261848	0.0520989	0.0696926	-0.101142	0.0211178	-0.0388301	0.0568706	0.0404537	0.0455777	0.0440897	0.0585403	0.0547013	0.060944	0.056818	-0.0822538	-0.231125	-0.0352665	-0.039191	0.0358648	-0.238405	0.033972	-0.124892	-0.0736321	0.0160013	-0.212151	-0.179478	-0.20295	-0.168995	-0.0862175	-0.177444	-0.227687	-0.156768	-0.194853	-0.184862	-0.209221	-0.185905	-0.0803608	-0.229708	-0.181582	-0.107746	-0.159192	-0.067542	-0.0794205	-0.144349	-0.0629256	-0.263363	-0.106593	-0.0269717
Megasphaera massiliensis	-0.383083	-0.0710271	0.781196	0.785795	0.577801	0.754302	0.690598	0.783586	0.759418	0.778319	0.773844	0.784813	0.782755	0.779563	0.784649	0.0526792	-0.135477	0.021399	0.534402	0.749648	-0.0808043	0.716397	0.20801	0.355475	0.725633	-0.164942	-0.168409	-0.174061	-0.130983	0.290116	-0.129746	-0.158094	-0.0658587	-0.175342	-0.200263	-0.0518448	-0.231755	0.0961168	-0.152412	-0.143363	-0.117079	0.0196867	-0.0250563	-0.103275	0.0387509	-0.123743	-0.202311	0.0174207	0.296718
Bifidobacterium adolescentis	-0.438673	-0.258666	0.0925085	0.0904168	-0.0681176	0.0458756	-0.00905117	0.0984141	0.071487	0.080542	0.0830487	0.099771	0.0933417	0.102504	0.0979489	-0.138478	0.537588	-0.0351387	-0.00678914	0.089574	-0.249031	0.0526447	-0.130903	-0.0630608	0.0539196	-0.242327	-0.16578	-0.114856	-0.225537	-0.193949	-0.158054	-0.281882	-0.104295	-0.253213	-0.11846	-0.197805	-0.0379917	-0.095243	-0.158352	-0.193456	-0.142302	-0.164687	-0.198036	-0.0921486	-0.0218697	-0.171745	-0.210006	-0.161483	-0.150918
Bifidobacterium pseudocatenulatum	-0.400591	-0.0848716	0.789247	0.785026	0.577623	0.754234	0.688404	0.79331	0.766854	0.781127	0.779339	0.793934	0.789752	0.793344	0.792109	-0.0316553	0.396152	0.0350586	0.543688	0.7709	-0.0961368	0.711441	0.186675	0.355771	0.730197	-0.18389	-0.186659	-0.155778	-0.166205	0.253377	-0.129733	-0.198147	-0.0496468	-0.195999	-0.170512	-0.0593228	-0.154652	0.0688334	-0.121083	-0.158675	-0.128815	0.00453657	-0.127782	-0.100361	0.103719	-0.14641	-0.197861	-0.0156661	0.222435
Bifidobacterium breve	-0.379145	-0.215762	-0.0265839	-0.00989765	-0.138056	-0.0539519	-0.098076	-0.0225736	-0.0414638	-0.0287084	-0.0294032	-0.0212163	-0.023215	-0.0217752	-0.0204648	-0.024189	-0.166203	0.071257	-0.0750715	-0.0415623	-0.204183	-0.0290365	-0.126081	-0.103412	-0.0449283	-0.175927	-0.138311	-0.138461	-0.141948	-0.136797	-0.158588	-0.172796	-0.127909	-0.188589	-0.174686	-0.182489	-0.172724	-0.0771549	-0.209193	-0.151624	-0.107404	-0.133506	-0.0228295	-0.0700393	-0.139579	-0.105607	-0.20966	-0.140356	-0.0325627
Bifidobacterium bifidum	-0.394709	-0.0465829	0.86848	0.863638	0.665777	0.837323	0.777898	0.871771	0.848355	0.86017	0.858473	0.872617	0.868536	0.869898	0.869648	-0.00456737	0.0082126	0.0322605	0.607674	0.847216	-0.0508835	0.786851	0.252404	0.40824	0.810743	-0.157424	-0.110848	-0.115383	-0.148513	0.293338	-0.0639639	-0.170664	-0.00844662	-0.180839	-0.12478	-0.00259112	-0.11375	0.120377	-0.0762889	-0.139956	-0.114589	0.0357805	-0.107513	-0.102136	0.122442	-0.142575	-0.146147	0.0455691	0.262741
Bifidobacterium pseudolongum	-0.81833	-0.383923	0.295338	0.311233	0.017549	0.242749	0.137232	0.306476	0.266058	0.280314	0.289148	0.307373	0.301145	0.313678	0.30299	-0.214612	0.136798	0.3961	0.131931	0.289995	-0.34809	0.252361	-0.136936	-0.0202712	0.230216	-0.371924	-0.288293	-0.252669	-0.319371	-0.0563078	-0.198934	-0.383901	-0.100873	-0.401053	-0.286804	-0.291702	-0.181333	-0.140925	-0.320414	-0.325313	-0.146524	-0.239451	-0.202076	-0.0319095	-0.0673418	-0.207174	-0.379677	-0.124713	-0.0282759
Bifidobacterium dentium	-0.341693	-0.198536	-0.0269309	0.00811484	-0.122924	-0.0519506	-0.08641	-0.0234373	-0.0388152	-0.0308007	-0.0187532	-0.0211072	-0.0267182	-0.0218989	-0.022809	-0.114162	-0.1759	-0.025467	-0.0747735	-0.0505795	-0.179265	0.0429955	-0.102459	-0.0938073	-0.057272	-0.166859	-0.188753	-0.125291	-0.104178	-0.196667	-0.144868	-0.176386	0.0951761	-0.165314	-0.157814	-0.16691	-0.150653	-0.0949308	-0.175195	-0.120031	-0.091109	-0.128839	0.341171	-0.114323	0.103603	-0.116898	-0.188908	0.22635	-0.189545
Bifidobacterium catenulatum	-0.471342	-0.12198	0.774601	0.771671	0.544068	0.735233	0.661077	0.779641	0.749121	0.76528	0.764693	0.78036	0.775939	0.779589	0.778486	-0.047947	0.354059	0.13726	0.528353	0.754936	-0.133196	0.696256	0.1572	0.331152	0.71038	-0.212011	-0.20749	-0.17598	-0.194351	0.221138	-0.146131	-0.235556	-0.0601364	-0.233252	-0.193582	-0.0925162	-0.167388	0.0444768	-0.152123	-0.18882	-0.138682	-0.0242032	-0.143635	-0.104036	0.089147	-0.14917	-0.230309	-0.030959	0.19601
Rothia dentocariosa	-0.544526	-0.207493	0.00220424	0.0205227	-0.206924	-0.021929	-0.105973	0.0162776	0.0105043	0.0043534	0.0153824	0.0160458	0.00646352	0.0220153	0.00924524	-0.249657	-0.276043	0.10994	-0.039145	0.0117536	-0.399193	-0.0141989	-0.086508	0.0080803	0.0268815	-0.367178	-0.248536	0.0113126	0.238487	-0.0194219	-0.288865	-0.219063	-0.211987	-0.285744	-0.0427379	-0.377904	0.0698668	-0.0218789	-0.150077	-0.251971	0.340018	-0.0905419	-0.0971853	0.0842625	-0.0938673	-0.178505	-0.157977	-0.0749793	0.0458872
Rothia mucilaginosa	-0.757107	-0.263733	0.476596	0.459598	0.170669	0.440639	0.31853	0.48124	0.415343	0.47522	0.484288	0.484612	0.483954	0.463468	0.491886	0.0654343	-0.208134	0.144164	0.227216	0.427206	-0.369211	0.380511	-0.084411	0.0546864	0.37384	-0.323539	-0.323378	-0.275685	-0.283388	0.0318616	-0.237481	-0.357989	-0.180023	-0.423517	-0.321366	-0.302145	-0.228476	-0.115256	-0.327675	-0.337269	0.122625	-0.223825	-0.264832	-0.0283839	-0.129262	-0.140056	-0.370133	-0.132376	0.0554871
Corynebacterium argentoratense	-0.350431	-0.195488	-0.0327339	-0.029861	-0.135613	-0.0181212	-0.0951997	-0.028387	-0.0417859	-0.0236797	-0.0218758	-0.0281254	-0.0307567	-0.0275318	-0.02836	-0.101428	-0.194214	-0.0272902	-0.0660279	-0.0429404	-0.182841	-0.0465855	-0.152211	-0.0921103	-0.0628577	-0.15447	-0.144781	-0.135604	-0.108303	0.299538	-0.0603035	-0.114842	-0.0722212	-0.161515	-0.16272	-0.175816	-0.0328591	-0.125993	-0.164425	-0.14124	-0.0512504	-0.150487	-0.133401	0.419725	-0.151674	-0.10566	-0.188494	0.033054	0.0739017
Corynebacterium matruchotii	-0.0651469	0.014874	-0.0413867	-0.022436	-0.0986131	-0.0482473	-0.0587171	-0.030759	0.00460856	-0.0335754	-0.0347142	-0.0316874	-0.0392813	-0.0276749	-0.0358401	-0.161549	-0.0502076	0.081034	0.0846698	-0.0272799	-0.213941	0.0284085	0.212504	0.221871	0.0466777	-0.157128	-0.0708554	0.285354	0.53556	0.0313667	-0.220604	-0.0242832	-0.0519662	0.0307462	0.276358	-0.16116	0.288502	0.207757	0.141296	0.0150501	0.180362	0.212977	0.150397	-0.065628	0.0924536	-0.0620006	0.173458	0.166722	0.0303265
Streptomyces sp. ICC4	-0.460114	-0.190471	0.11152	0.126911	-0.0575182	0.0847895	0.0189295	0.118428	0.093802	0.104674	0.12045	0.11789	0.113998	0.127233	0.11598	-0.140672	0.413608	0.0229115	0.0207365	0.110994	-0.210094	0.090794	-0.140702	-0.0742516	0.0795995	-0.212412	-0.248042	-0.222699	-0.171143	-0.0486432	-0.169202	-0.180418	-0.129487	-0.208905	-0.260594	-0.194711	-0.194067	-0.118002	-0.240677	-0.216917	0.0850941	-0.167758	-0.0960203	-0.0751269	-0.0849623	-0.134722	-0.294672	-0.190448	0.0398586
Streptomyces armeniacus	-0.019472	0.0479297	0.27457	0.171913	0.167388	0.287839	0.24009	0.254378	0.170373	0.306732	0.287714	0.263304	0.28387	0.174302	0.306823	0.843077	-0.00292417	0.019764	0.157905	0.138408	-0.198853	0.183312	-9.40401e-05	0.113879	0.151111	0.0197658	-0.179499	-0.0967975	-0.125989	-0.0455199	-0.201507	-0.181268	-0.162893	-0.114415	-0.116127	-0.170188	-0.142872	0.00416134	-0.118186	-0.0786673	0.0584937	-0.0201066	-0.105773	-0.147296	-0.161852	0.073254	-0.0376556	-0.117264	-0.129041
Actinomyces sp. oral taxon 171	-0.472975	-0.0602873	-0.0431972	-0.0393538	-0.164675	-0.0421816	-0.114234	-0.0359923	-0.0613323	-0.0445066	-0.00280342	-0.0358717	-0.0389571	-0.0361901	-0.0368164	-0.113574	-0.225331	0.0204522	-0.0911049	-0.0528876	-0.235172	-0.0518907	-0.176706	-0.14211	-0.074134	-0.204454	-0.22915	-0.126039	0.0147923	-0.0496429	-0.143563	-0.101423	-0.14613	-0.247622	-0.214283	-0.222805	-0.0874043	-0.167744	-0.213467	-0.189487	0.760186	-0.172487	-0.169227	0.0580732	-0.162476	-0.129045	-0.22716	-0.148401	-0.028898
Actinomyces sp. oral taxon 169	-0.73066	-0.320139	-0.0151068	0.00105297	-0.231743	-0.034052	-0.139465	-0.00504487	-0.0380648	-0.0173006	0.00196001	-0.00420726	-0.0094303	-0.00108142	-0.00648555	-0.171464	-0.303016	0.0393176	-0.109588	-0.0251759	-0.368131	-0.0373413	-0.229738	-0.17478	-0.0562149	-0.338471	-0.255302	-0.21417	-0.164207	0.0154208	-0.187516	-0.257577	-0.178062	-0.353955	-0.271658	-0.319355	-0.127699	-0.178737	-0.310759	-0.286288	0.219752	-0.255615	-0.187706	0.168393	-0.217891	-0.204589	-0.334606	-0.12776	0.00848223
Actinomyces sp. 432	-0.394171	0.000762478	0.0439945	0.0501574	-0.067399	0.0473261	-0.0108459	0.0504525	0.031997	0.0407608	0.0842173	0.0501424	0.0473293	0.0526191	0.0479306	-0.117743	-0.178474	0.0065732	-0.00498105	0.0410186	-0.158391	0.0405664	-0.104586	-0.0679367	0.0197254	-0.178065	-0.191886	-0.0969469	0.0451752	-0.0387997	-0.106249	-0.0521899	-0.115445	-0.192671	-0.18266	-0.155252	-0.0777634	-0.112931	-0.158331	-0.139666	0.807788	-0.110098	-0.124769	-0.0102324	-0.102826	-0.125084	-0.188805	-0.125978	0.0140445
Actinomyces viscosus	-0.337646	0.0221099	-0.0322554	-0.026945	-0.117891	-0.0280739	-0.0746556	-0.026448	-0.0419857	-0.0346501	0.00893185	-0.026704	-0.0294566	-0.0250583	-0.028406	-0.105805	-0.175453	-0.00207389	-0.0562254	-0.0365732	-0.143865	-0.0285142	-0.116429	-0.095833	-0.0491567	-0.154278	-0.16459	-0.0663723	0.0744987	-0.090101	-0.103105	-0.0293456	-0.110184	-0.169544	-0.151647	-0.142591	-0.0544473	-0.115731	-0.135035	-0.11769	0.821613	-0.102158	-0.107466	-0.0251553	-0.0973871	-0.11161	-0.155254	-0.13001	-0.0280569
Cutibacterium acnes	-0.0646259	0.0662211	0.131915	0.108521	0.0901112	0.14809	0.111624	0.133203	0.0856036	0.134066	0.130302	0.134746	0.152856	0.118473	0.14554	0.191077	0.190019	0.0362134	0.0142177	0.0895497	-0.0355683	0.0653755	-0.0538517	-0.0178202	0.0548431	0.252168	-0.122513	-0.192702	-0.0504622	-0.0838266	-0.0900472	-0.00508479	-0.0136333	-0.137614	-0.103787	-0.0691489	-0.118745	-0.0565871	-0.0647363	-0.183947	0.280497	-0.0950445	-0.229597	-0.163896	-0.07458	0.45426	-0.0891125	-0.0443315	-0.00633398
Eggerthella guodeyinii	-0.729153	-0.425228	-0.00326509	0.0169753	-0.234301	-0.0641063	-0.150245	0.00599792	-0.0338384	-0.0164461	-0.00786787	0.00858485	0.000719995	0.010706	0.00642445	-0.199305	0.206235	0.140259	-0.111041	-0.0180646	-0.39806	-0.00709671	-0.241226	-0.181147	-0.0580447	-0.365437	-0.287212	-0.214307	-0.310953	-0.333097	-0.263462	-0.406821	-0.0918213	-0.389895	-0.244983	-0.34218	-0.164798	-0.178691	-0.309826	-0.29968	-0.188066	-0.280907	-0.0733184	-0.127517	-0.05231	-0.222049	-0.360387	-0.105317	-0.257161
Gordonibacter urolithinfaciens	-0.798442	-0.456521	-0.0550561	-0.02344	-0.295457	-0.0942038	-0.207011	-0.0454039	-0.0868491	-0.0591762	-0.0480169	-0.0427648	-0.0491397	-0.0435385	-0.0436826	-0.199876	-0.18491	0.295788	-0.142961	-0.0775507	-0.440407	-0.0281013	-0.294611	-0.218395	-0.120206	-0.37725	-0.356837	-0.28687	-0.296375	-0.144102	-0.250081	-0.39732	-0.0724524	-0.404021	-0.340565	-0.407447	-0.224235	-0.238824	-0.390578	-0.318114	-0.183748	-0.315411	0.0637366	0.0877639	-0.0996979	-0.201987	-0.427691	0.0375603	-0.181918
Gordonibacter pamelaeae	-0.727414	-0.388477	0.0630266	0.0894861	-0.170053	0.0137811	-0.0806219	0.072956	0.0331392	0.0539797	0.0626858	0.0743452	0.0702182	0.0755018	0.0740039	-0.17089	-0.0291029	0.73795	-0.0101242	0.0428338	-0.377019	0.070562	-0.214588	-0.125395	0.0072368	-0.3307	-0.327654	-0.268392	-0.276593	-0.210271	-0.280069	-0.381877	-0.100713	-0.369145	-0.311821	-0.351369	-0.261455	-0.199696	-0.352801	-0.298219	-0.182153	-0.24799	-0.0246857	-0.0802232	-0.0737924	-0.104167	-0.393506	-0.0833793	-0.166971
Raoultibacter timonensis	-0.574595	-0.266377	0.292746	0.305405	0.0885762	0.245622	0.173212	0.298768	0.26754	0.284828	0.285107	0.300829	0.295543	0.299756	0.299825	-0.0576874	-0.022869	-0.00780125	0.131509	0.271309	-0.262782	0.254433	-0.0550338	0.0289592	0.247231	-0.267014	-0.206717	-0.183939	-0.230995	-0.0832299	-0.206428	-0.281446	-0.131153	-0.294266	-0.222184	-0.212103	-0.20178	-0.0474955	-0.247657	-0.229052	-0.152693	-0.15036	-0.10071	-0.128849	-0.0820155	-0.192512	-0.285461	-0.138458	0.00863888
Arabiibacter massiliensis	-0.506258	-0.303187	-0.0186638	-0.0178988	-0.182754	-0.065295	-0.122502	-0.0118502	-0.0389716	-0.0314966	-0.0263015	-0.0102934	-0.0172022	-0.00723498	-0.0131185	-0.166778	0.291705	0.0070197	-0.0960668	-0.0187956	-0.279295	-0.0515022	-0.1806	-0.137725	-0.0545988	-0.270729	-0.131375	-0.10087	-0.238915	-0.25555	-0.129727	-0.299291	-0.101214	-0.280639	-0.102785	-0.217455	0.00350273	-0.116334	-0.163346	-0.209137	-0.122682	-0.200507	-0.205497	-0.0650537	-0.0512779	-0.188714	-0.208578	-0.158011	-0.198149
Collinsella stercoris	-0.691307	-0.358015	0.203292	0.214274	-0.0375848	0.146788	0.0589454	0.212624	0.174381	0.189424	0.195946	0.214043	0.207497	0.216395	0.211748	-0.185255	0.248642	0.462797	0.0821116	0.193321	-0.342207	0.172976	-0.145228	-0.0422586	0.145828	-0.333292	-0.269196	-0.204709	-0.294847	-0.179944	-0.226902	-0.38862	-0.0921082	-0.361174	-0.229427	-0.289595	-0.151866	-0.141198	-0.270971	-0.281857	-0.193274	-0.216614	-0.153031	-0.0960398	-0.0189751	-0.16381	-0.333071	-0.117919	-0.147124
Olsenella sp. oral taxon 807	-0.462917	-0.0582266	-0.031498	-0.0248029	-0.155975	-0.0400999	-0.099056	-0.0244365	-0.0464157	-0.037132	0.00575601	-0.0241127	-0.028554	-0.0222544	-0.0264905	-0.133942	-0.172132	-0.0294096	-0.0793193	-0.0368542	-0.208597	-0.0350065	-0.151362	-0.12916	-0.0565577	-0.217273	-0.193777	-0.0914768	0.00501493	-0.158917	-0.136034	-0.103824	-0.123606	-0.237079	-0.177697	-0.190255	-0.070023	-0.134341	-0.179336	-0.1691	0.754501	-0.153039	-0.145773	-0.0562533	-0.114189	-0.161248	-0.206365	-0.162536	-0.0753646
Nostoc sp. CE1543	-0.128562	-0.226001	-0.0908591	-0.0736997	-0.0682924	-0.0375914	-0.0688383	-0.0838083	-0.0421916	-0.0761416	-0.0889511	-0.0845821	-0.0844748	-0.0758975	-0.0869341	-0.120832	-0.0814034	-0.100162	0.0478507	-0.0394565	-0.109248	-0.048834	0.220954	0.194694	-0.0311475	-0.199458	0.155255	0.190541	0.277512	0.450929	0.014215	-0.0125164	-0.106808	0.207804	0.320484	0.0357992	0.326147	0.264502	0.233677	0.269476	-0.0144091	0.251139	0.124251	0.419785	0.168408	-0.181079	0.209145	0.408453	0.301563
Bacteroides sp. A1C1	-0.412811	-0.275877	-0.0543881	-0.0506012	-0.197147	-0.0907132	-0.143779	-0.0481918	-0.0603882	-0.0630106	-0.058638	-0.0460308	-0.053326	-0.0441237	-0.0486595	-0.159032	-0.0796873	-0.0521736	-0.0616361	-0.0288001	-0.272468	-0.0506966	-0.0754961	-0.0754946	-0.0577023	-0.260455	-0.115609	0.0524879	-0.161902	-0.231849	-0.152778	-0.258909	-0.0079065	-0.206832	0.0238537	-0.195266	0.036881	0.00127555	-0.0427242	-0.0789313	-0.0239288	-0.105046	-0.195212	0.00230506	-0.0348758	-0.179593	-0.132083	-0.0762642	-0.222951
Bacteroides sp. CBA7301	-0.360838	-0.262486	-0.0493729	-0.043151	-0.172198	-0.0820532	-0.128574	-0.0437229	-0.0463806	-0.0554548	-0.0542986	-0.0409954	-0.048129	-0.040189	-0.0419367	-0.139984	-0.0352038	-0.0495894	-0.00454115	-0.0260036	-0.253609	-0.0185482	-0.0172915	-0.00576266	-0.0387055	-0.235154	-0.0718673	0.108661	-0.144651	-0.210435	-0.160822	-0.228136	0.0158161	-0.154229	0.0873531	-0.162664	0.0658468	0.0717549	0.0206978	-0.0128147	-0.0795463	-0.0307256	-0.15317	-0.0200197	-0.00683334	-0.165382	-0.0869928	-0.0348164	-0.24489
Bacteroides sp. KGMB10229	-0.229139	-0.217638	0.0241911	0.0180164	-0.0748179	0.021219	-0.0341814	0.0234697	-0.00123397	0.00997677	0.00984112	0.0223612	0.016371	0.0318104	0.0168377	-0.137205	-0.0899974	-0.0113738	-0.0572519	0.0391468	-0.0419053	-0.0139476	-0.140983	-0.132556	-0.0108589	-0.169978	-0.142639	-0.120284	-0.163552	-0.155765	-0.0789531	-0.210498	-0.113864	-0.240116	-0.13454	-0.105325	-0.0700907	-0.107383	-0.0829894	-0.190002	-0.0011297	-0.117536	-0.196465	-0.048468	-0.127898	-0.0646435	-0.173457	-0.107589	0.0249867
Bacteroides stercoris	-0.39414	-0.235295	-0.0428664	-0.0444179	-0.157568	-0.078385	-0.117251	-0.038319	-0.0533883	-0.0521427	-0.0488121	-0.036053	-0.0418651	-0.0376405	-0.0373779	-0.108441	-0.0384644	-0.041056	-0.0623997	-0.0288976	-0.224092	-0.0501938	-0.0611607	-0.0768559	-0.0530275	-0.20487	-0.0911662	0.0346652	-0.169215	-0.242065	-0.126035	-0.226034	0.0337057	-0.200193	0.0153785	-0.150428	0.0178988	-0.0130234	-0.0541248	-0.111539	-0.070328	-0.120991	-0.174135	-0.063571	-0.0012747	-0.15383	-0.104895	-0.0611658	-0.22726
Bacteroides zhangwenhongii	-0.351172	-0.247838	-0.0341336	-0.0345268	-0.139574	-0.0597547	-0.102457	-0.0309371	-0.0413023	-0.0449069	-0.0437776	-0.0291802	-0.035787	-0.0271838	-0.0312942	-0.128164	-0.0266332	-0.0335992	-0.0338309	-0.0150598	-0.172949	-0.0300117	-0.0446762	-0.0548885	-0.0400276	-0.200841	-0.101956	0.0478007	-0.165383	-0.221553	-0.136962	-0.221347	0.0297603	-0.194814	0.0177997	-0.127581	0.00297569	0.00609767	-0.0222653	-0.0948097	-0.0897697	-0.0783058	-0.16546	-0.0593762	-0.0113268	-0.13828	-0.10297	-0.0410922	-0.187271
Bacteroides salyersiae	-0.0899273	-0.276048	-0.0595824	-0.0643113	-0.195639	-0.104111	-0.155359	-0.056521	-0.069295	-0.0738774	-0.0751908	-0.0539871	-0.0613194	-0.0545917	-0.0566597	-0.134738	-0.176944	-0.0635478	-0.128815	-0.0690949	-0.277657	-0.0912693	-0.155768	-0.129401	-0.106727	-0.224457	-0.203016	-0.153314	-0.177249	-0.262989	-0.215248	-0.327361	-0.112251	-0.13225	-0.0579883	-0.238228	-0.0870827	-0.109773	-0.15235	-0.166053	-0.109044	-0.202696	-0.242491	-0.148614	-0.108027	-0.0157124	-0.221273	-0.111612	-0.309659
Bacteroides faecis	-0.311136	-0.32509	-0.0631038	-0.0508517	-0.243518	-0.108965	-0.174374	-0.055913	-0.0617007	-0.0684038	-0.0722649	-0.0535743	-0.063427	-0.048711	-0.0569719	-0.188774	-0.116099	-0.0678755	-0.0641018	-0.0363573	-0.314448	-0.0402946	-0.121389	-0.080898	-0.0589596	-0.314279	-0.149341	0.137248	-0.192531	-0.255166	-0.203055	-0.326904	-0.0996495	-0.163983	0.0340177	-0.262388	0.0446394	0.0123916	-0.018508	0.0763327	-0.126288	-0.0425468	-0.194032	0.220624	-0.126894	-0.209765	-0.162481	-0.132474	-0.268432
Bacteroides intesti1lis	-0.314895	-0.319285	-0.0437	-0.0380229	-0.196071	-0.0846048	-0.144729	-0.0377636	-0.0404009	-0.0561261	-0.0549773	-0.0345983	-0.0435518	-0.0325763	-0.0371348	-0.180354	-0.106682	-0.0622106	-0.0318643	-0.0345214	-0.298827	-0.0265356	-0.0722536	-0.0345744	-0.0576622	-0.267736	-0.134716	-0.00129025	-0.190635	-0.236284	-0.195212	-0.308428	-0.0419583	-0.168401	0.0364981	-0.21509	0.0174222	0.0207932	-0.0558579	-0.0869024	-0.120811	-0.0996108	-0.198095	-0.0957166	-0.058108	-0.122759	-0.168541	-0.0544405	-0.299819
Bacteroides caecimuris	-0.37368	-0.260752	-0.0489026	-0.0433072	-0.177261	-0.0840612	-0.129916	-0.0429844	-0.04911	-0.0558279	-0.0534504	-0.0403881	-0.0475264	-0.0393807	-0.0418745	-0.143534	-0.0460466	-0.0514269	-0.0253718	-0.0259576	-0.25425	-0.0289189	-0.0364774	-0.0307254	-0.0434166	-0.239459	-0.0806475	0.102286	-0.150566	-0.228842	-0.160119	-0.232747	0.0109072	-0.172258	0.0691288	-0.168761	0.0528892	0.0429687	0.00404	-0.0238449	-0.053854	-0.0526161	-0.16788	0.000884132	-0.00980369	-0.170264	-0.0971894	-0.052838	-0.246999
Alistipes finegoldii	-0.39578	-0.253475	-0.0383477	-0.0430558	-0.169917	-0.0781435	-0.121311	-0.0340944	-0.0550093	-0.0486799	-0.046322	-0.0316919	-0.0374078	-0.0348974	-0.0328872	-0.102767	-0.0658322	-0.0448426	-0.0900144	-0.0280412	-0.246048	-0.0630136	-0.0876737	-0.108402	-0.0607311	-0.218508	-0.131304	-0.00574255	-0.191128	-0.260184	-0.148144	-0.256631	0.0260726	-0.226431	-0.0166226	-0.176991	-0.0201482	-0.0503525	-0.093919	-0.14881	-0.0804641	-0.166685	-0.201396	-0.0667277	-0.0115907	-0.138493	-0.136943	-0.071481	-0.242304
Alistipes senegalensis	-0.394957	-0.239517	-0.0417278	-0.0423378	-0.161799	-0.0804289	-0.118408	-0.0367949	-0.0535643	-0.0528224	-0.0494458	-0.0348463	-0.0410935	-0.0345714	-0.0375998	-0.128965	-0.0524558	-0.0418192	-0.0839387	-0.024614	-0.223697	-0.0607363	-0.0733548	-0.101086	-0.0554762	-0.208714	-0.113058	0.0125047	-0.176887	-0.25152	-0.132156	-0.232429	0.0447402	-0.213677	-0.00508966	-0.156409	-0.0105815	-0.0400403	-0.0775967	-0.136048	-0.0731067	-0.15296	-0.187504	-0.0619527	0.00521805	-0.146487	-0.121642	-0.064065	-0.226462
Alistipes megaguti	-0.382531	-0.24583	-0.0402895	-0.040109	-0.163001	-0.0804666	-0.117939	-0.0354692	-0.0529353	-0.0508489	-0.049945	-0.033638	-0.0400099	-0.0328159	-0.036577	-0.130002	-0.0536308	-0.0404775	-0.0870055	-0.0188744	-0.226234	-0.0600609	-0.0698576	-0.105073	-0.0515277	-0.210407	-0.121719	0.0119471	-0.179682	-0.25328	-0.142965	-0.236876	0.0548807	-0.21164	-0.0030665	-0.158952	-0.0224428	-0.0368958	-0.0738832	-0.130736	-0.106747	-0.154685	-0.186202	-0.0567089	0.00835889	-0.146562	-0.123245	-0.0623698	-0.22623
Parabacteroides goldsteinii	-0.125899	-0.320678	-0.0496483	-0.041495	-0.222731	-0.100314	-0.160108	-0.0443033	-0.0594425	-0.0596735	-0.067014	-0.0430152	-0.0526333	-0.0351093	-0.0486593	-0.200544	-0.191215	-0.0625715	-0.123081	-0.0294777	-0.301545	-0.0702719	-0.160173	-0.144736	-0.0700702	-0.283861	-0.202047	-0.0936666	-0.189468	-0.277161	-0.23927	-0.343735	-0.124471	-0.13072	-0.0395594	-0.260092	-0.0673208	-0.0703136	-0.0999713	-0.0794082	-0.149554	-0.163394	-0.249196	-0.0262665	-0.123918	-0.0711922	-0.227967	-0.147254	-0.261352
Butyricimo1s virosa	0.0731844	-0.195862	0.0487159	0.0597229	-0.10123	0.0142002	-0.0357428	0.052094	0.0494215	0.0463478	0.0343332	0.0522727	0.043914	0.0617746	0.0468472	-0.151126	-0.194183	-0.048466	-0.0227696	0.0652117	-0.215273	0.0362402	-0.10417	-0.0473912	0.0432461	-0.22047	-0.158072	-0.063739	-0.0843403	-0.11612	-0.20638	-0.249556	-0.203517	-0.0664722	-0.0207996	-0.205502	-0.0565788	-0.00370686	-0.0349674	0.0524392	-0.0978029	-0.042808	-0.155949	0.0822742	-0.158121	-0.0409179	-0.177807	-0.13582	-0.119023
Butyricimo1s faecalis	-0.35122	-0.344632	-0.0684288	-0.0630154	-0.260039	-0.119933	-0.184458	-0.061897	-0.0803844	-0.0812779	-0.0811115	-0.0598518	-0.0700428	-0.0546132	-0.0653458	-0.210658	-0.158434	-0.065726	-0.145909	-0.0513995	-0.314334	-0.0937529	-0.187159	-0.169212	-0.0944279	-0.318779	-0.18063	-0.00058465	-0.223533	-0.326643	-0.213651	-0.357138	-0.110748	-0.263492	-0.0386285	-0.269988	-0.0235686	-0.0962686	-0.103723	-0.0857638	-0.0772756	-0.172633	-0.251891	0.088041	-0.111843	-0.170756	-0.22096	-0.155329	-0.290054
Prevotella intermedia	-0.349753	-0.195985	0.00896785	0.00963746	-0.0927237	0.0279302	-0.0485915	0.0135895	-0.00285899	0.00771388	0.0105631	0.0132972	0.017845	0.0179731	0.00999178	-0.0999915	-0.166946	-0.0278566	-0.0475572	0.0687698	-0.161345	-0.0192112	-0.13602	-0.090029	-0.0268276	-0.173156	-0.159136	-0.135169	-0.133877	0.291365	0.165638	-0.114153	-0.0508903	-0.137901	-0.178602	-0.187347	-0.00474875	-0.0975578	-0.173755	-0.124385	0.033035	-0.143144	-0.126058	0.391902	-0.164496	-0.121429	-0.184072	-0.00544672	0.279251
Prevotella melaninogenica	0.0203476	-0.143133	0.0164905	0.0234658	-0.117681	-0.0155994	-0.0581415	0.0148484	0.0108118	0.0194752	0.0097856	0.0145039	0.00672305	0.0238949	0.00962723	-0.126176	-0.126507	-0.0412354	-0.035931	0.0719701	-0.152699	0.0137476	-0.108755	-0.0631281	0.0520379	-0.214731	-0.138911	0.0455075	-0.0814476	-0.110685	-0.161158	-0.204445	-0.156789	-0.0393729	-0.0211187	-0.174719	-0.0199744	0.0161796	0.0319856	0.132805	-0.0570985	0.0113078	-0.13165	0.248587	-0.131898	-0.144133	-0.131497	-0.177155	-0.0656454
Prevotella copri	-0.0849693	-0.0304263	0.358628	0.327501	0.275902	0.378339	0.328109	0.350299	0.314352	0.351639	0.348684	0.350358	0.350998	0.33883	0.355156	0.133923	-0.0250183	0.0278365	0.203424	0.320019	0.0979802	0.285781	-0.00504184	0.0773225	0.284469	0.00464542	-0.15936	-0.16351	-0.128361	0.044625	-0.0691763	-0.118726	-0.108517	-0.201957	-0.190996	0.00829173	-0.170891	-0.0628308	-0.0760586	-0.182522	0.0674627	-0.0171065	-0.099317	-0.123945	-0.0752232	0.0941429	-0.135661	-0.0395969	0.193058
Paraprevotella xylaniphila	-0.471206	-0.238537	-0.048896	-0.0456143	-0.20895	-0.0862977	-0.143049	-0.0422139	-0.0655907	-0.0602183	-0.0437454	-0.0405912	-0.0484689	-0.0379411	-0.0445481	-0.178701	-0.130252	-0.0477654	-0.111102	-0.0298446	-0.2752	-0.0689723	-0.127566	-0.144944	-0.0692705	-0.277035	-0.183105	-0.0268335	-0.144172	-0.290167	-0.195568	-0.245775	-0.0222281	-0.284803	-0.0657226	-0.218207	-0.0546815	-0.0932793	-0.1172	-0.165711	0.217729	-0.186022	-0.225591	-0.0545497	-0.0417148	-0.185707	-0.194128	-0.121169	-0.23289
Escherichia albertii	-0.220912	-0.0188037	-0.0435025	-0.0424494	-0.0324612	-0.0482489	-0.0639328	-0.0412918	-0.0577447	-0.0494943	-0.0186882	-0.0410687	-0.0403598	-0.0355092	-0.0445445	-0.0673658	-0.114824	-0.0498202	-0.0851221	-0.0535646	0.062487	-0.0560886	-0.128313	-0.107658	-0.0747268	-0.0777661	-0.114821	-0.123764	-0.0269669	-0.119957	-0.0204064	-0.0209952	-0.0968286	-0.0869367	-0.168761	-0.0989604	-0.128396	-0.117708	-0.147104	-0.133834	0.473059	-0.150562	-0.172234	-0.0981465	-0.127678	-0.162408	-0.17607	-0.150941	-0.131934
Escherichia fergusonii	-0.208062	-0.0150529	-0.00158641	-0.000358613	0.00889254	-0.00745466	-0.0224194	0.000277432	-0.0161647	-0.00767424	0.0211624	0.000395575	0.000757655	0.00618561	-0.00328063	-0.0629861	-0.108361	-0.0413664	-0.0540348	-0.0132324	0.076729	-0.0178	-0.113295	-0.0835145	-0.0342305	-0.0732748	-0.115563	-0.133044	-0.0333556	-0.0941366	-0.0161219	-0.0233554	-0.100262	-0.079311	-0.176576	-0.0923388	-0.139008	-0.111812	-0.14943	-0.133484	0.429572	-0.14399	-0.158717	-0.101386	-0.120993	-0.162426	-0.181408	-0.141886	-0.113817
Escherichia marmotae	-0.198221	-0.0127631	-0.0406767	-0.0403825	-0.0216096	-0.0450299	-0.0573459	-0.038889	-0.0548168	-0.046625	-0.0173062	-0.0387416	-0.0377934	-0.0330896	-0.0422471	-0.0602821	-0.107912	-0.0496678	-0.0835217	-0.0506734	0.0790339	-0.0557614	-0.124607	-0.10419	-0.071532	-0.0666055	-0.107369	-0.123641	-0.0267007	-0.114331	-0.0119684	-0.0143534	-0.096154	-0.0763421	-0.166227	-0.0900718	-0.130368	-0.115913	-0.142922	-0.129742	0.449497	-0.147414	-0.170749	-0.0983727	-0.126077	-0.157375	-0.169831	-0.150706	-0.126852
Klebsiella variicola	-0.0720484	-0.094037	-0.034812	-0.0227309	-0.145174	-0.0551465	-0.101096	-0.0311634	-0.0414839	-0.0305554	-0.0276792	-0.031579	-0.0379068	-0.0218309	-0.0365884	-0.133645	-0.180705	-0.0565463	-0.0728701	-0.00717273	-0.157204	-0.0300422	-0.135613	-0.106089	-0.0251553	-0.209819	-0.144422	-0.0369809	-0.0216256	-0.131613	-0.158384	-0.121487	-0.195316	-0.111194	-0.0731571	-0.213106	-0.0602302	-0.0398315	-0.0505039	0.0428224	0.218231	-0.0538314	-0.161615	0.107963	-0.197034	-0.153052	-0.170329	-0.18174	-0.0957236
Enterobacter hormaechei	-0.264147	-0.0713146	-0.0437552	-0.0421938	-0.0468215	-0.0494139	-0.0768027	-0.0411701	-0.0608639	-0.0489612	-0.0234988	-0.0409501	-0.0406141	-0.0347733	-0.044824	-0.0802536	-0.136917	-0.0300175	-0.0974873	-0.0487956	0.0375971	-0.0648964	-0.159366	-0.123254	-0.0815179	-0.101482	-0.142043	-0.164013	-0.0758911	-0.0601073	-0.00340569	-0.0548213	-0.117379	-0.1061	-0.205254	-0.13589	-0.146006	-0.142679	-0.187205	-0.160144	0.34834	-0.184363	-0.188552	-0.0213455	-0.161462	-0.177894	-0.218976	-0.142526	-0.102472
Cronobacter sakazakii	-0.254525	0.162871	-0.0398218	-0.0345233	0.0233177	-0.0466867	-0.0313893	-0.0355807	-0.0551236	-0.0494041	-0.0168537	-0.0361317	-0.0380097	-0.0289034	-0.0414322	-0.0530484	-0.0778671	-0.0605406	-0.108024	-0.0566475	0.16041	-0.046123	-0.13502	-0.141534	-0.080512	0.0372695	-0.062197	-0.121279	-0.0233248	-0.145226	0.173587	0.109786	0.133736	-0.129323	-0.213208	0.0220206	-0.165391	-0.17325	-0.195026	-0.214228	0.363723	-0.210268	-0.126711	-0.165829	-0.0989925	-0.192404	-0.108523	-0.0750315	-0.129391
Serratia marcescens	-0.0817158	-0.0102781	-0.0348713	-0.0295552	-0.103451	-0.0368952	-0.0635008	-0.0318923	-0.0442167	-0.0238042	-0.0410263	-0.0317502	-0.0364453	-0.0264378	-0.0356056	-0.0970944	-0.10422	-0.0333552	-0.0778351	0.0195464	-0.0973767	-0.0235367	-0.0892627	-0.0846158	-0.0423111	-0.176006	-0.0809053	-0.0762995	-0.0785102	-0.0671007	-0.0331357	-0.114412	0.0171002	-0.130756	-0.103576	-0.0976887	-0.066313	-0.0103064	-0.0799684	-0.069245	-0.0794905	-0.0829179	-0.144002	0.116984	-0.120246	-0.165197	-0.132154	-0.020679	-0.0513978
Providencia rettgeri	-0.615378	-0.158764	0.731861	0.751304	0.491529	0.711549	0.612123	0.740959	0.704375	0.720369	0.727881	0.739694	0.737184	0.750369	0.733333	-0.145749	-0.189405	0.244234	0.471178	0.719566	-0.116401	0.665145	0.102442	0.245096	0.660392	-0.190319	-0.280125	-0.320651	-0.231634	0.379421	-0.0968374	-0.184255	-0.0282872	-0.267264	-0.333011	-0.123456	-0.283514	-0.0307486	-0.264509	-0.279705	-0.0123558	-0.116064	-0.129647	0.0117117	-0.0266494	-0.0401367	-0.340985	0.0926552	0.318778
Vibrio parahaemolyticus	-0.739161	-0.225535	0.66872	0.690774	0.411216	0.647393	0.536145	0.679034	0.648575	0.6596	0.678329	0.679182	0.672652	0.687042	0.67221	-0.163726	-0.158787	-0.008878	0.423062	0.657875	-0.2045	0.619417	0.0922924	0.223121	0.596432	-0.329176	-0.272637	-0.249735	-0.185841	0.291591	-0.115084	-0.268947	-0.110543	-0.26123	-0.299133	-0.162371	-0.214435	0.00588693	-0.261159	-0.226206	0.11014	-0.0972931	-0.0498651	0.0227859	0.0283547	-0.274585	-0.342634	0.0795716	0.290345
Haemophilus parainfluenzae	-0.489836	-0.263624	-0.0409931	-0.0312972	-0.192038	-0.032758	-0.131125	-0.0329229	-0.0562369	-0.0425003	-0.0376609	-0.0326203	-0.029904	-0.0278217	-0.0351576	-0.147931	-0.205724	-0.00223312	-0.0929605	0.0122963	-0.280005	-0.0554795	-0.185112	-0.137211	-0.0800048	-0.22544	-0.239195	-0.188386	-0.193545	0.222434	0.0820775	-0.172132	-0.0532836	-0.191153	-0.230468	-0.279324	-0.0575669	-0.128926	-0.241875	-0.182071	0.00910354	-0.205999	-0.130753	0.361236	-0.192438	-0.124722	-0.269644	0.00318489	0.1913
Sphingomo1s sp. NIC1	-0.131632	-0.176777	-0.00720354	-0.012588	-0.118309	-0.0324065	-0.0803262	-0.0047351	-0.0316439	-0.0106066	-0.0142967	-0.00396424	-0.00564029	-0.0053771	-0.000506191	-0.0536222	0.635568	-0.0260416	-0.0626363	-0.0205373	-0.21585	-0.0400532	-0.141907	-0.084578	-0.045235	-0.117739	-0.210775	-0.16051	-0.156463	-0.134184	-0.202082	-0.200807	-0.157563	-0.155842	-0.124136	-0.187019	-0.0916313	-0.109185	-0.137355	-0.124752	-0.0733987	-0.118317	-0.13462	-0.0709808	-0.0384707	0.113885	-0.187856	-0.0858165	-0.0947311
Cupriavidus taiwanensis	-0.76751	-0.457421	0.0845475	0.0960253	-0.183104	0.0575573	-0.0756877	0.0950755	0.0679119	0.0767715	0.0862796	0.0970824	0.0901576	0.103028	0.092795	-0.264285	0.00010766	0.00823087	-0.00837883	0.0965588	-0.419101	0.0606805	-0.215665	-0.0854791	0.0287125	-0.414381	-0.304485	-0.22	-0.304172	0.0808946	-0.15832	-0.39045	-0.162233	-0.38315	-0.239923	-0.373219	-0.0543462	-0.121403	-0.292891	-0.282058	-0.0404431	-0.25263	-0.248316	0.215826	-0.174962	-0.230205	-0.390896	-0.0744962	-0.0120853
Variovorax paradoxus	-0.762944	-0.334288	0.0621634	0.0705018	-0.172182	0.0368728	-0.0787426	0.0735938	0.0314208	0.0522072	0.0587831	0.0739529	0.0677762	0.0809697	0.069038	-0.231315	0.0131437	0.0116763	-0.0822831	0.0689248	-0.337696	0.0112796	-0.251704	-0.172589	-0.00707987	-0.232334	-0.296102	-0.256585	-0.340959	0.0291047	-0.0669863	-0.313921	-0.0321197	-0.406553	-0.292204	-0.28223	-0.1207	-0.209742	-0.33204	-0.345177	-0.0372577	-0.328818	-0.292825	0.184889	-0.183573	-0.10623	-0.378419	-0.0874982	-0.0301655
Desulfovibrio piger	-0.450434	-0.265688	-0.0450014	-0.0464985	-0.176463	-0.0827875	-0.129648	-0.0395253	-0.0614373	-0.0567449	-0.0533183	-0.0378109	-0.04344	-0.0370636	-0.0412283	-0.136782	-0.0725204	-0.0434983	-0.107204	-0.0282481	-0.238591	-0.0741904	-0.117716	-0.135223	-0.0693833	-0.225935	-0.11301	-0.0285414	-0.209303	-0.220149	-0.0815479	-0.255663	0.0105229	-0.236957	-0.0463882	-0.178833	0.00893046	-0.0737142	-0.119242	-0.171556	-0.102786	-0.189086	-0.202768	-0.0117135	-0.0361161	-0.169612	-0.148421	-0.082647	-0.18412
Sorangium cellulosum	-0.690743	-0.385429	-0.00242713	0.0134527	-0.219844	-0.0515496	-0.123871	0.00766542	-0.0261029	-0.0117324	-0.00314435	0.00986817	0.00229939	0.0128847	0.00564771	-0.226415	-0.0362475	-0.000425401	-0.109033	0.0205131	-0.382339	-0.0297976	-0.145983	-0.138111	-0.0363857	-0.370318	-0.1754	-0.0809298	-0.18518	-0.200539	-0.201641	-0.316462	-0.0278241	-0.374716	-0.0932525	-0.287822	-0.0269399	-0.135541	-0.161401	-0.238246	-0.0663833	-0.232867	-0.105416	0.0643023	0.0575805	-0.245824	-0.243196	-0.00294923	-0.168263
Bacteriophage sp.	-0.709321	-0.334801	0.0978265	0.117299	-0.120307	0.0903443	-0.0290783	0.107948	0.0734206	0.0951565	0.109278	0.10852	0.107699	0.115244	0.10378	-0.194484	-0.198481	-0.0273102	-0.0311422	0.14063	-0.35855	0.0749418	-0.20646	-0.110375	0.0442147	-0.348135	-0.296155	-0.235646	-0.181474	0.20633	-0.0365393	-0.251465	-0.126943	-0.335889	-0.305457	-0.342078	-0.119436	-0.168489	-0.306637	-0.250925	0.135438	-0.237216	-0.0985649	0.340811	-0.161731	-0.237933	-0.3651	-0.0283638	0.207308
Geobacillus sp. Y412MC52	-0.146283	-0.167237	-0.0228735	-0.0193205	-0.125883	-0.0459813	-0.0857671	-0.0188229	-0.0349719	-0.0284128	-0.0293951	-0.0189626	-0.022106	-0.0124298	-0.0190095	-0.125228	0.698843	-0.0304679	-0.0561291	-0.0226785	-0.173536	-0.0397534	-0.127986	-0.0730563	-0.0457784	-0.128837	-0.177137	-0.131198	-0.12859	-0.103463	-0.163807	-0.159655	-0.122462	-0.125592	-0.107416	-0.153579	-0.0647639	-0.0935531	-0.114721	-0.10322	-0.0712476	-0.0975309	-0.105425	-0.0481966	-0.0159927	0.0439211	-0.172379	-0.0844038	-0.0750017
Parageobacillus caldoxylosilyticus	-0.187376	-0.174531	0.0190462	0.0242194	-0.109405	-0.00187142	-0.0555229	0.0241143	0.00520978	0.0133305	0.0129958	0.023958	0.0203378	0.0310459	0.0235265	-0.143502	0.658811	-0.0201407	-0.02911	0.0207192	-0.200755	-0.00273601	-0.129175	-0.0609827	-0.00981563	-0.119572	-0.206133	-0.156449	-0.148807	-0.071955	-0.167128	-0.179263	-0.129751	-0.151569	-0.129981	-0.171405	-0.0722459	-0.0961891	-0.12877	-0.121536	-0.0376925	-0.106359	-0.114733	-0.0315625	-0.0260481	0.0901023	-0.205606	-0.0721318	-0.0433634
Paenibacillus rhizovicinus	-0.518516	-0.287458	-0.0472467	-0.0348513	-0.178747	-0.0250338	-0.117888	-0.0355452	-0.0361899	-0.0408242	-0.0212691	-0.0363453	-0.038976	-0.032078	-0.0383398	-0.175866	-0.187381	-0.0391157	0.00509131	0.00926645	-0.351117	-0.0235806	0.0648541	-0.0166731	-0.0497209	-0.318245	-0.147281	0.0522806	0.0854155	0.347501	0.00403314	-0.222553	-0.0911262	0.0268869	0.0203076	-0.192735	0.187126	0.0433543	-0.0319871	-0.0134346	-0.00836874	-0.0082688	0.041461	0.458949	0.0730453	-0.263816	-0.0740446	0.244699	0.284709
Paenibacillus polymyxa	-0.762311	-0.280208	0.668231	0.689367	0.379415	0.64725	0.517503	0.677148	0.65816	0.665696	0.675876	0.678329	0.671407	0.683889	0.673539	-0.173585	-0.127004	0.115744	0.479911	0.664874	-0.264604	0.64176	0.0817578	0.295907	0.621316	-0.359658	-0.294616	-0.206086	-0.193256	0.412722	-0.182443	-0.281911	-0.0949069	-0.290018	-0.276137	-0.234619	-0.188165	0.0490577	-0.238055	-0.221908	-0.0392414	-0.0603811	-0.077122	0.157343	-0.0100831	-0.258885	-0.350565	0.0558632	0.293317
Paenibacillus agaridevorans	-0.529886	-0.297044	-0.0446953	-0.036243	-0.199205	-0.0306731	-0.137573	-0.0375884	-0.0596336	-0.0388292	-0.0336426	-0.0370777	-0.0372555	-0.0343373	-0.0387975	-0.152064	-0.192867	-0.0113087	-0.101477	-0.0242577	-0.281565	-0.0597257	-0.22103	-0.14319	-0.0909572	-0.247521	-0.229227	-0.204798	-0.177163	0.338994	0.0108156	-0.184819	-0.0864792	-0.227214	-0.24875	-0.278956	-0.0484832	-0.17054	-0.259147	-0.198278	-0.0379864	-0.221169	-0.127706	0.503267	-0.194385	-0.163812	-0.282011	0.0320343	0.1633
Listeria monocytogenes	-0.579841	-0.165545	0.788169	0.777833	0.520337	0.755967	0.658123	0.786234	0.731867	0.787061	0.790096	0.788917	0.789143	0.768853	0.795317	0.12468	-0.172283	0.221909	0.491035	0.74106	-0.187528	0.709091	0.104467	0.275024	0.701421	-0.216118	-0.31702	-0.299515	-0.234821	0.300091	-0.193798	-0.266833	-0.0407661	-0.282576	-0.313354	-0.17171	-0.308109	-0.0255338	-0.259788	-0.256029	-0.0941424	-0.100222	-0.014783	-0.0425434	0.043447	-0.104469	-0.300779	0.0944747	0.202793
Streptococcus lutetiensis	-0.229486	0.0769807	0.998215	0.990744	0.831411	0.985531	0.938109	0.998304	0.979223	0.996573	0.99234	0.998719	0.998208	0.991712	0.998578	0.0939468	-0.0208956	0.0505191	0.7308	0.968987	0.053505	0.920066	0.350229	0.519232	0.941625	-0.0661136	-0.111874	-0.116048	-0.0644801	0.459761	-0.0440499	-0.067443	0.0224794	-0.0889933	-0.133396	0.0704196	-0.169779	0.167226	-0.0434594	-0.0775913	-0.0648085	0.12049	-0.015028	-0.0806183	0.155033	-0.0744691	-0.0994036	0.117621	0.39422
Streptococcus infantarius	-0.228911	0.0774806	0.998475	0.991564	0.832245	0.985853	0.938634	0.9987	0.980277	0.996607	0.992519	0.999043	0.9984	0.992661	0.998616	0.088421	-0.0203013	0.0504499	0.731924	0.970212	0.0553793	0.920713	0.351531	0.520286	0.942836	-0.0661845	-0.110207	-0.114905	-0.0631198	0.461872	-0.042551	-0.0657574	0.0226964	-0.0877859	-0.132144	0.0721886	-0.168215	0.168377	-0.0417668	-0.0766155	-0.0634279	0.121837	-0.016015	-0.0795883	0.155528	-0.0749558	-0.0987929	0.117451	0.396723
Limosilactobacillus reuteri	-0.605884	-0.299273	0.318117	0.334713	0.0884884	0.278441	0.194049	0.328101	0.305323	0.306721	0.318459	0.327833	0.323094	0.335197	0.326454	-0.177944	0.364304	0.690875	0.256095	0.318004	-0.284166	0.310873	-0.010751	0.0912542	0.281357	-0.30377	-0.253794	-0.179253	-0.212829	-0.000798824	-0.23268	-0.32377	-0.103582	-0.225843	-0.193772	-0.215409	-0.167992	-0.0418043	-0.200496	-0.188783	-0.151112	-0.0864988	-0.0987917	-0.0949177	0.0289269	-0.107894	-0.287671	-0.0802457	0.00904338
Enterococcus mundtii	-0.450264	-0.0661621	0.853537	0.877861	0.647241	0.828118	0.762299	0.858746	0.841277	0.847093	0.85038	0.859372	0.854236	0.863193	0.853899	-0.0680794	-0.14327	0.0303981	0.599574	0.830857	-0.0537313	0.82581	0.246428	0.399484	0.799791	-0.174672	-0.186886	-0.181212	-0.119515	0.34637	-0.0977274	-0.138175	0.0539028	-0.182207	-0.21646	-0.0290357	-0.235502	0.099238	-0.147329	-0.143651	-0.115215	0.0298075	0.129564	-0.0907573	0.15378	-0.156933	-0.214605	0.193527	0.303813
Enterococcus avium	-0.386485	-0.141499	0.363444	0.393072	0.216414	0.337224	0.289304	0.366591	0.34663	0.359566	0.36895	0.368783	0.363587	0.365706	0.367066	-0.0672636	-0.172033	-0.00428393	0.219403	0.331398	-0.133641	0.398649	0.0496717	0.121714	0.315856	-0.169667	-0.211148	-0.154309	-0.111195	0.0100129	-0.144615	-0.176349	0.10021	-0.17681	-0.191209	-0.117093	-0.202046	-0.016498	-0.170151	-0.131382	-0.103301	-0.0631245	0.313832	-0.13058	0.15882	-0.130218	-0.203827	0.259562	-0.0118671
Enterococcus cecorum	-0.597609	-0.105095	0.834146	0.85681	0.587509	0.819338	0.718904	0.842147	0.822794	0.829148	0.842486	0.842755	0.837681	0.847579	0.837219	-0.120282	-0.16849	0.0422521	0.599607	0.824982	-0.137283	0.81053	0.202553	0.386503	0.776047	-0.248068	-0.256642	-0.197809	-0.129676	0.444679	-0.0863494	-0.168818	0.0133056	-0.225382	-0.262647	-0.106958	-0.21006	0.0818588	-0.191397	-0.172509	0.0748025	0.00189754	0.0335577	0.0380526	0.0747932	-0.2082	-0.279059	0.159998	0.354113
Granulicatella elegans	-0.57241	-0.167094	0.361649	0.377454	0.159622	0.344353	0.259774	0.370979	0.344092	0.35487	0.370878	0.369726	0.370181	0.375431	0.367487	-0.132578	-0.0992594	0.850576	0.269598	0.364691	-0.196371	0.337551	-0.0212846	0.0977925	0.318212	-0.229116	-0.256063	-0.21924	-0.129823	0.151551	-0.130787	-0.199367	-0.0820316	-0.241417	-0.269838	-0.193469	-0.216977	-0.0935702	-0.247369	-0.208635	0.143334	-0.100429	-0.121874	0.0243899	-0.0552002	-0.0388804	-0.287703	-0.0802413	0.155181
A1erocolum1 cellulosilytica	-0.827147	-0.390773	0.105472	0.130147	-0.147746	0.0896447	-0.0411941	0.116069	0.081641	0.105329	0.118647	0.117634	0.113027	0.120759	0.114997	-0.191284	-0.302412	0.0882207	-0.0137192	0.102831	-0.391244	0.0976222	-0.21858	-0.112093	0.0460349	-0.378515	-0.330853	-0.275672	-0.249488	0.170848	-0.151518	-0.307113	-0.122233	-0.372951	-0.35349	-0.360953	-0.192638	-0.174997	-0.373702	-0.300937	0.00725532	-0.268148	-0.0948132	0.281018	-0.192268	-0.25356	-0.416481	-0.0228161	0.0919243
Clostridium butyricum	-0.810555	-0.368426	0.0518152	0.0768211	-0.195494	0.0418557	-0.0903234	0.0633801	0.0271648	0.0512049	0.070985	0.0638351	0.0616939	0.0682676	0.061781	-0.214475	-0.234727	0.48545	-0.0280288	0.0541015	-0.387338	0.0513055	-0.254785	-0.142423	-0.0100224	-0.360816	-0.3698	-0.307458	-0.22338	0.159732	-0.157767	-0.299055	-0.133288	-0.366955	-0.386716	-0.382566	-0.214245	-0.234221	-0.396182	-0.305774	0.112629	-0.275238	-0.0991009	0.288058	-0.19297	-0.168738	-0.435936	-0.0430099	0.0799457
Clostridium tetani	-0.567836	-0.302707	-0.0426311	-0.0351004	-0.203557	-0.0297317	-0.13902	-0.0351353	-0.0586813	-0.0374739	-0.0320128	-0.0346635	-0.0343887	-0.0319273	-0.0364399	-0.143021	-0.263959	-0.000563975	-0.105236	-0.022237	-0.287606	-0.0658719	-0.226766	-0.151285	-0.0891638	-0.252937	-0.219707	-0.209485	-0.186717	0.32752	0.0134656	-0.187541	-0.110093	-0.244453	-0.257004	-0.280557	-0.0544752	-0.170007	-0.271366	-0.212748	-0.0122936	-0.229813	-0.172508	0.491857	-0.230836	-0.170255	-0.290059	-0.0153499	0.179603
Clostridium beijerinckii	-0.724245	-0.245715	0.643022	0.661388	0.36364	0.621807	0.501515	0.652769	0.621946	0.639562	0.645939	0.652826	0.648905	0.65845	0.648587	-0.146681	-0.142541	0.325312	0.426528	0.633465	-0.240002	0.58995	0.0448963	0.221012	0.577913	-0.310462	-0.301838	-0.274885	-0.214604	0.400931	-0.154872	-0.256633	-0.0935163	-0.310274	-0.332094	-0.215395	-0.248536	-0.0406613	-0.291532	-0.263149	-0.0642646	-0.117199	-0.133543	0.164515	-0.0548533	-0.187077	-0.367235	0.00316074	0.303936
Clostridium novyi	-0.729147	-0.351514	0.023205	0.049339	-0.189738	0.0156046	-0.101297	0.0326503	0.000713742	0.025091	0.0367555	0.0334295	0.0306018	0.036378	0.0318668	-0.176595	-0.308554	0.26402	-0.0595289	0.0115122	-0.338588	0.0299138	-0.23653	-0.145235	-0.0342631	-0.30278	-0.315569	-0.281388	-0.222693	0.176541	-0.150332	-0.260117	-0.0801718	-0.331913	-0.352102	-0.325201	-0.209324	-0.20952	-0.365656	-0.28174	-0.0326827	-0.264195	-0.0391167	0.300253	-0.177183	-0.163767	-0.392536	0.022043	0.0532572
Acidaminococcus intestini	-0.39345	-0.234076	-0.040355	-0.0437192	-0.155277	-0.0795743	-0.114914	-0.0360345	-0.0556825	-0.0510662	-0.0491394	-0.034033	-0.0396903	-0.0355135	-0.0360902	-0.104434	-0.0427012	-0.0390729	-0.0907667	-0.0294447	-0.215083	-0.0649461	-0.0859809	-0.110132	-0.0584535	-0.196533	-0.0910199	0.00460024	-0.187378	-0.259562	-0.109458	-0.233379	0.0297418	-0.21552	-0.0101447	-0.148732	0.00440813	-0.048578	-0.0818514	-0.142901	-0.107886	-0.157375	-0.183552	-0.0668046	-0.00396396	-0.148403	-0.11364	-0.0770237	-0.222093
Megasphaera stantonii	-0.800719	-0.408959	0.161431	0.188197	-0.0924937	0.127299	0.0137335	0.171478	0.134746	0.15239	0.164942	0.173734	0.168018	0.177226	0.168561	-0.220253	-0.197083	0.0181196	0.00735536	0.170029	-0.38117	0.159803	-0.186834	-0.0945894	0.0940971	-0.383168	-0.296755	-0.248922	-0.289699	0.0146046	-0.0887471	-0.361473	-0.0395023	-0.371239	-0.296617	-0.335978	-0.13081	-0.149604	-0.329057	-0.290433	-0.115517	-0.264549	0.0244023	0.127289	-0.0543077	-0.270679	-0.378512	0.0709939	0.0114565
Mycobacterium paragordo1e	-0.0998884	0.0639893	0.0624232	0.0737043	-0.0713995	0.0678911	0.00331051	0.0716289	0.0421616	0.0540307	0.0537972	0.0688317	0.0674961	0.0770222	0.0692552	-0.149702	-0.053315	0.484042	0.0284688	0.051896	-0.167463	0.0343076	-0.0879114	-0.0606027	0.0298884	0.179553	-0.213618	-0.23265	-0.152659	-0.0856629	-0.109278	-0.0514841	-0.0129907	-0.134883	-0.16128	-0.0921291	-0.144036	-0.118809	-0.0922272	-0.175803	0.158807	-0.100132	-0.136329	-0.110274	-0.0831703	0.538479	-0.200561	0.0536685	-0.0118351
Bifidobacterium angulatum	-0.643768	-0.28787	0.453745	0.461665	0.200133	0.405317	0.31483	0.462638	0.430429	0.440542	0.443325	0.463523	0.456217	0.469888	0.458918	-0.174351	0.346487	0.100948	0.259257	0.447765	-0.261309	0.392114	-0.0320663	0.111343	0.396003	-0.311828	-0.226347	-0.202345	-0.269903	0.04401	-0.167731	-0.317565	-0.115227	-0.323387	-0.218322	-0.2078	-0.129734	-0.0529703	-0.224234	-0.25533	-0.165177	-0.146828	-0.200221	-0.0471147	-0.00793854	-0.208555	-0.307118	-0.111995	0.0583618
Bifidobacterium animalis	-0.329158	-0.190832	-0.026929	0.00829465	-0.120185	-0.0507389	-0.0842839	-0.023572	-0.0381963	-0.0302522	-0.0185849	-0.0212987	-0.0267619	-0.0220399	-0.0229616	-0.11138	-0.180473	-0.0217902	-0.072257	-0.0499975	-0.174506	0.0441657	-0.0978859	-0.0905326	-0.0558486	-0.16259	-0.187789	-0.123728	-0.0965515	-0.189378	-0.145189	-0.167972	0.0957487	-0.161995	-0.155581	-0.164584	-0.152894	-0.0916073	-0.17143	-0.114088	-0.0876631	-0.123564	0.345728	-0.111939	0.103307	-0.112823	-0.185072	0.230497	-0.184176
Gardnerella vagi1lis	-0.566835	-0.255438	-0.0440816	-0.0189075	-0.193801	-0.0759882	-0.126694	-0.0349828	-0.0583007	-0.045968	-0.0438796	-0.0347962	-0.036441	-0.0317673	-0.035443	-0.117756	-0.181445	0.587417	-0.0792132	-0.037019	-0.272291	-0.0530594	-0.13393	-0.109876	-0.0576313	-0.281176	-0.167587	-0.110976	-0.0492177	-0.0643772	-0.218983	-0.211688	-0.10513	-0.253662	-0.176668	-0.261294	-0.137285	-0.151699	-0.229258	-0.230042	-0.129088	-0.165634	-0.0356771	0.0629701	-0.038241	-0.132709	-0.20983	-0.0790822	-0.0180569
Klebsiella oxytoca	-0.263187	-0.101848	-0.0508759	-0.0433472	-0.112902	-0.0666924	-0.108489	-0.0466245	-0.0687327	-0.0533024	-0.0303729	-0.0467848	-0.0500291	-0.0375445	-0.0518719	-0.129925	-0.173364	-0.0369742	-0.104531	-0.0396588	-0.0777757	-0.0600135	-0.171651	-0.140955	-0.0690707	-0.181925	-0.156013	-0.155576	-0.0513264	-0.155152	-0.0929185	-0.111989	-0.163005	-0.14347	-0.162616	-0.189677	-0.109836	-0.0973537	-0.144099	-0.128018	0.41242	-0.166957	-0.206234	-0.0789022	-0.181042	-0.197279	-0.230906	-0.196596	-0.133952
Citrobacter rodentium	-0.250816	-0.0424616	-0.0431001	-0.0430489	-0.0475751	-0.0536731	-0.0744911	-0.0406115	-0.060056	-0.0501697	-0.0204155	-0.0403238	-0.0413719	-0.0350466	-0.0440802	-0.0787561	-0.121224	-0.0504427	-0.0949929	-0.0561821	0.0337596	-0.0625492	-0.149149	-0.122425	-0.0782614	-0.0989575	-0.124008	-0.137884	-0.0558929	-0.13805	-0.025852	-0.0557594	-0.121974	-0.110263	-0.180968	-0.118956	-0.12287	-0.13503	-0.16639	-0.155361	0.425646	-0.171749	-0.186992	-0.100142	-0.142675	-0.175022	-0.1975	-0.16536	-0.149006
Citrobacter freundii	-0.167973	-0.110456	-0.0386059	-0.030265	-0.0795857	-0.0555785	-0.0886667	-0.035455	-0.0526621	-0.039827	-0.0262721	-0.0355076	-0.0379828	-0.0254068	-0.0408529	-0.108741	-0.161984	-0.0594108	-0.0966564	-0.0282602	-0.0182794	-0.0485247	-0.163231	-0.125886	-0.0562807	-0.155498	-0.151792	-0.112765	-0.0735823	-0.122364	-0.0779033	-0.10656	-0.16143	-0.0909667	-0.155049	-0.177617	-0.133403	-0.0904784	-0.129795	-0.0571011	0.247454	-0.136088	-0.200381	0.0342302	-0.197978	-0.19794	-0.21685	-0.18843	-0.131527
Citrobacter tructae	-0.260957	-0.0453944	-0.00265172	-0.00204694	0.00578481	0.00203236	-0.0254928	-0.000361242	-0.0136435	-0.00755613	0.0196045	-0.000315066	0.00158063	0.00634539	-0.00489973	-0.072328	-0.121282	-0.0574651	-0.0593669	0.000769151	0.070971	-0.0260051	-0.138751	-0.0766509	-0.0354601	-0.0930142	-0.119732	-0.143682	-0.043476	-0.00961248	0.0399853	-0.0218695	-0.116489	-0.0884769	-0.195556	-0.109759	-0.124126	-0.107025	-0.169795	-0.134263	0.443573	-0.147337	-0.177233	0.00177212	-0.149803	-0.18115	-0.18508	-0.136202	-0.0110323
Enterobacter ludwigii	-0.277337	-0.0585966	-0.0419555	-0.0407807	-0.0580402	-0.0539609	-0.0790664	-0.0386341	-0.0602004	-0.0500745	-0.0200613	-0.0384168	-0.038667	-0.0322973	-0.04228	-0.0942393	-0.110949	0.0185697	-0.0946587	-0.0531327	0.0200789	-0.0626436	-0.15132	-0.129634	-0.0798729	-0.10444	-0.145442	-0.148634	-0.067889	-0.154807	-0.0495851	-0.0680954	-0.107056	-0.128139	-0.18818	-0.132103	-0.142954	-0.14182	-0.175544	-0.170385	0.431554	-0.184617	-0.211761	-0.10983	-0.1362	-0.144593	-0.211241	-0.164098	-0.161782
Ralstonia sp. 56D2	-0.1336	-0.182373	-0.00848873	-0.0134139	-0.12848	-0.0322356	-0.0799596	-0.00621113	-0.0318989	-0.0109885	-0.0145417	-0.0053896	-0.00694012	-0.00694787	-0.00194796	-0.058706	0.611095	-0.0261295	-0.0608467	-0.0205617	-0.208273	-0.0398989	-0.137494	-0.0806561	-0.0460291	-0.137737	-0.204944	-0.152902	-0.149355	-0.125851	-0.193448	-0.195165	-0.152595	-0.148881	-0.119358	-0.184392	-0.0824738	-0.101771	-0.131175	-0.117279	-0.0709106	-0.112997	-0.123398	-0.0586	-0.0270383	0.0956863	-0.184791	-0.0736413	-0.0852943
Ralstonia mannitolilytica	-0.146582	-0.178575	0.00322847	-0.00663617	-0.118621	-0.0209992	-0.0681012	0.00469096	-0.0251394	0.00160303	-0.00252502	0.00579389	0.00514687	0.000642057	0.0109631	-0.0207553	0.643444	-0.0209536	-0.0577332	-0.0138996	-0.210313	-0.0337077	-0.13944	-0.0805237	-0.039266	-0.135339	-0.208266	-0.155551	-0.155649	-0.132732	-0.195943	-0.200489	-0.151205	-0.156072	-0.124845	-0.185078	-0.0887874	-0.106974	-0.13842	-0.125035	-0.0726497	-0.118093	-0.132631	-0.0681039	-0.0322361	0.0817647	-0.181208	-0.089473	-0.093888
Cupriavidus malaysiensis	-0.124833	0.446819	0.00790721	0.00705814	0.19884	0.0615712	0.0992897	0.0130159	0.00681691	0.00351992	-0.00806853	0.00940528	0.0200644	0.020285	0.00361174	0.0855649	0.12561	-0.0890365	-0.0777577	0.0114363	0.441555	-0.00310181	-0.125164	-0.088723	-0.058451	0.448145	0.129263	-0.159212	-0.135481	0.389855	0.755458	0.469611	0.587508	-0.128666	-0.239558	0.39166	-0.162811	-0.167213	-0.247476	-0.184555	-0.0731931	-0.191746	-0.259486	0.172229	-0.258858	0.025709	0.0838288	0.107137	0.246917
Turicimo1s muris	-0.434705	-0.234422	-0.00614121	-0.00639709	-0.134391	-0.0436394	-0.0859615	-0.000918337	-0.0197929	-0.0175902	-0.0117347	0.000882773	-0.00538824	0.00144668	-0.00216141	-0.131315	-0.0596601	-0.0381168	-0.0601887	0.0108167	-0.22074	-0.0269836	-0.0681107	-0.0911761	-0.022857	-0.216973	-0.123868	0.00453985	-0.178071	-0.23383	-0.126627	-0.232565	0.0432705	-0.227868	-0.0252993	-0.156423	-0.0180256	-0.0428237	-0.0890302	-0.148024	-0.0348647	-0.153984	-0.187343	-0.0601464	0.00311616	-0.164017	-0.132784	-0.0666453	-0.198628
Bacteroides eggerthii	-0.401306	-0.250767	-0.0460535	-0.0437368	-0.16912	-0.0804819	-0.125784	-0.0407819	-0.0521452	-0.0553676	-0.0513306	-0.0386008	-0.0454941	-0.0377321	-0.0406633	-0.136959	-0.0490042	-0.0445606	-0.0488098	-0.0278109	-0.237795	-0.0403344	-0.0574963	-0.0645276	-0.050121	-0.224977	-0.0993404	0.0416961	-0.166164	-0.23517	-0.137912	-0.236538	0.0235425	-0.194647	0.0227923	-0.160553	0.0267291	0.00887251	-0.0438184	-0.0957005	-0.0558855	-0.10343	-0.174501	-0.062125	-0.0168747	-0.165125	-0.114329	-0.0596499	-0.227083
Alistipes indistinctus	-0.38587	-0.233998	-0.0414464	-0.0425305	-0.1559	-0.0805182	-0.114612	-0.0368025	-0.0544562	-0.0521955	-0.0507811	-0.0349833	-0.0409442	-0.0347516	-0.0377375	-0.120309	-0.0428259	-0.0391743	-0.0883868	-0.0230478	-0.211858	-0.0636188	-0.0713078	-0.105836	-0.0541696	-0.197608	-0.103259	0.0159644	-0.179165	-0.251008	-0.122395	-0.224911	0.0547999	-0.21005	-0.0028915	-0.146399	-0.0107862	-0.0421484	-0.0732813	-0.133559	-0.107409	-0.153605	-0.18264	-0.0547527	0.0108869	-0.147334	-0.112012	-0.0643854	-0.219688
Fusobacterium nucleatum	-0.764643	-0.241112	0.513912	0.534133	0.246367	0.500534	0.378254	0.52572	0.494007	0.507302	0.522236	0.524743	0.522196	0.532325	0.520101	-0.18053	-0.155859	0.579728	0.348401	0.529595	-0.26896	0.473317	0.0204042	0.151516	0.456261	-0.321534	-0.349433	-0.249704	-0.180185	0.295701	-0.139288	-0.267575	-0.064866	-0.292979	-0.328403	-0.235339	-0.26021	-0.0636054	-0.302112	-0.239215	0.136575	-0.127369	-0.125885	0.135866	-0.0395872	-0.15449	-0.365479	0.0075188	0.27902
Faecalibacterium sp. IP118	-0.432743	-0.256867	-0.0279538	-0.0254178	-0.157171	-0.0214667	-0.104265	-0.021556	-0.0395037	-0.030453	-0.0271815	-0.0209397	-0.0175437	-0.0172426	-0.0241013	-0.125525	-0.151568	-0.0387939	-0.082466	0.0321428	-0.243975	-0.0559742	-0.158722	-0.112409	-0.0646176	-0.221168	-0.16415	-0.135958	-0.168392	0.225211	0.129655	-0.164255	-0.057074	-0.17771	-0.160722	-0.233027	0.0100488	-0.101226	-0.188737	-0.143798	-0.00132949	-0.177476	-0.150541	0.364521	-0.154255	-0.143082	-0.207012	-0.0170562	0.20054
Ruminococcus sp. FMBCY1	-0.632716	-0.298961	-0.0460095	-0.0306879	-0.226963	-0.0454253	-0.152619	-0.0379278	-0.0646999	-0.0424618	-0.0291698	-0.0369852	-0.0385881	-0.0348366	-0.0383114	-0.13316	-0.322054	-0.0375711	-0.11797	-0.0391377	-0.320213	-0.0594507	-0.233074	-0.16773	-0.0883722	-0.292491	-0.255607	-0.220672	-0.166508	0.177706	-0.0856836	-0.202059	-0.15432	-0.283552	-0.292982	-0.307098	-0.132238	-0.171307	-0.310877	-0.234007	0.138144	-0.237494	-0.136572	0.328878	-0.245171	-0.203979	-0.330575	-0.085457	0.122207
Ruminococcus bovis	-0.690576	-0.297514	0.0449988	0.0637012	-0.16352	0.0311556	-0.0747802	0.0537797	0.0237833	0.0454052	0.0621639	0.0549107	0.0509153	0.057099	0.0532681	-0.139964	-0.306197	0.0276194	-0.0518748	0.0371741	-0.329889	0.0298039	-0.20081	-0.127587	0.00102209	-0.319027	-0.274544	-0.226314	-0.1738	0.0841114	-0.168274	-0.234606	-0.163115	-0.321129	-0.305223	-0.305361	-0.18006	-0.15872	-0.322453	-0.257858	0.173343	-0.231132	-0.134044	0.188031	-0.21269	-0.217167	-0.353831	-0.117027	0.0686604
Ruminococcus champanellensis	-0.551495	-0.30495	-0.0417514	-0.0334158	-0.199128	-0.0296672	-0.136062	-0.034615	-0.0571616	-0.0364892	-0.0331254	-0.0340184	-0.0332681	-0.0314185	-0.0357192	-0.131731	-0.26074	-0.032009	-0.104534	-0.015274	-0.285857	-0.0639978	-0.21568	-0.146189	-0.0851678	-0.254159	-0.221556	-0.202674	-0.185324	0.328575	0.0222047	-0.184124	-0.103157	-0.231261	-0.252966	-0.281347	-0.0630612	-0.157471	-0.269587	-0.201752	-0.0411864	-0.223304	-0.153204	0.487053	-0.226637	-0.178125	-0.285137	-0.0137011	0.196755
Ruminococcus albus	-0.536648	-0.279057	-0.00478354	0.00142362	-0.159455	0.0115894	-0.0955659	0.00240274	-0.0193879	0.000114808	0.00581977	0.00275137	0.00385165	0.00571077	0.00051427	-0.140321	-0.250294	-0.0141526	-0.0713617	0.0268	-0.268895	-0.0291141	-0.196371	-0.121499	-0.0501803	-0.244152	-0.222468	-0.195312	-0.171944	0.371435	0.0503396	-0.170421	-0.0818374	-0.220948	-0.246244	-0.267851	-0.045101	-0.152535	-0.25446	-0.193743	0.00562492	-0.212287	-0.157478	0.511137	-0.205476	-0.171058	-0.273246	0.0128489	0.221062
Ruthenibacterium lactatiformans	-0.587886	-0.335524	0.0227946	0.0572095	-0.21165	-0.0156176	-0.111737	0.0317122	0.00192666	0.0204703	0.0316504	0.0336588	0.0241786	0.0399818	0.0279883	-0.238357	-0.251282	-0.0544373	-0.07976	0.0375728	-0.388524	0.0575598	-0.183925	-0.149882	-0.0092225	-0.384678	-0.31326	-0.188853	-0.172353	-0.172961	-0.247065	-0.302605	-0.0493361	-0.34379	-0.218813	-0.36027	-0.168323	-0.119861	-0.24427	-0.185465	0.0457485	-0.219549	0.0507978	0.0149885	-0.0646193	-0.257442	-0.343544	0.0479514	-0.15422
Acutalibacter muris	-0.782145	-0.407683	0.0691715	0.088989	-0.173213	0.0596675	-0.0723609	0.0792804	0.0450019	0.0694273	0.0782144	0.080601	0.0775067	0.0844038	0.0775577	-0.202322	-0.214958	0.0325278	-0.0500552	0.0824832	-0.386927	0.0524461	-0.233367	-0.136377	0.00661408	-0.362371	-0.332773	-0.27436	-0.266338	0.239573	-0.0959967	-0.304563	-0.0941479	-0.352192	-0.33969	-0.362782	-0.154144	-0.190612	-0.360986	-0.292547	-0.0723756	-0.284245	-0.112962	0.387051	-0.182286	-0.236222	-0.402954	0.0138423	0.123963
Caproiciproducens sp. NJN-50	-0.736738	-0.401148	-0.0176264	-0.00423293	-0.236001	-0.0236325	-0.148836	-0.00804737	-0.0404902	-0.0171317	-0.0102052	-0.00688934	-0.00903325	-0.00372913	-0.00970453	-0.192315	-0.257884	0.0578887	-0.109974	0.00234047	-0.377437	-0.0408777	-0.258592	-0.177382	-0.074887	-0.342993	-0.285706	-0.243438	-0.261865	0.222031	-0.0491601	-0.291245	-0.103958	-0.333152	-0.300071	-0.352784	-0.097874	-0.196941	-0.334213	-0.277947	-0.0796864	-0.288793	-0.167782	0.425685	-0.211467	-0.222763	-0.365859	-0.0202309	0.106326
Monoglobus pectinilyticus	-0.736875	-0.405333	-0.0339489	-0.0190057	-0.263135	-0.046421	-0.171296	-0.0236542	-0.0580708	-0.0354552	-0.0246288	-0.022719	-0.0255106	-0.0172608	-0.0250137	-0.224323	0.144537	0.0748561	-0.119708	-0.0109555	-0.396928	-0.0488286	-0.280884	-0.187779	-0.0916629	-0.364876	-0.35593	-0.262855	-0.259847	0.153503	-0.11327	-0.307547	-0.107158	-0.340304	-0.328117	-0.38119	-0.136301	-0.224123	-0.354706	-0.284494	-0.031614	-0.295502	-0.156738	0.35778	-0.177315	-0.232136	-0.398048	-0.0541351	0.0539349
Oscillibacter sp. NSJ-62	-0.697823	-0.365855	0.0133544	0.0223824	-0.19661	0.0125858	-0.111049	0.0225782	-0.00784041	0.0144214	0.0225819	0.023504	0.0215683	0.0272472	0.0204499	-0.191962	-0.178166	-0.0135465	-0.0834371	0.0389163	-0.351226	-0.0166116	-0.232658	-0.151993	-0.0420997	-0.328007	-0.287481	-0.226154	-0.238633	0.271626	-0.0385852	-0.262537	-0.0902161	-0.313739	-0.285519	-0.333179	-0.0849188	-0.18437	-0.309637	-0.262622	-0.0197202	-0.272786	-0.20324	0.453557	-0.201241	-0.227587	-0.346205	-0.0205065	0.13341
Caproicibacter fermentans	-0.69164	-0.367357	-0.000911485	0.0100497	-0.205218	-0.00147945	-0.12302	0.00805635	-0.0217568	0.000647843	0.00874796	0.00912984	0.00692591	0.0120287	0.00621821	-0.185341	-0.257313	0.00200439	-0.0928365	0.0164318	-0.349429	-0.0248641	-0.24404	-0.157276	-0.0574551	-0.320943	-0.2568	-0.230095	-0.237759	0.260439	-0.0224403	-0.264409	-0.106298	-0.310692	-0.280627	-0.326619	-0.063681	-0.185078	-0.306246	-0.258905	-0.0436901	-0.267718	-0.163091	0.446206	-0.203608	-0.220823	-0.338723	-0.00347222	0.124543
Caproicibacterium lactatifermentans	-0.767653	-0.385058	0.126236	0.139392	-0.114938	0.118027	-0.0129962	0.136302	0.10278	0.125488	0.133327	0.137357	0.134938	0.141487	0.13354	-0.192943	-0.253024	0.033395	-0.00455869	0.147201	-0.367058	0.0908292	-0.207882	-0.101562	0.0644403	-0.358433	-0.284574	-0.254768	-0.263036	0.280202	-0.0388374	-0.295473	-0.118217	-0.341371	-0.309466	-0.338285	-0.101131	-0.162831	-0.329028	-0.282216	-0.0519014	-0.264521	-0.184089	0.403353	-0.197498	-0.247536	-0.37392	-0.025973	0.17669
Pseudoclostridium thermosuccinogenes	-0.767778	-0.412747	-0.00482715	0.0282004	-0.231056	-0.0232698	-0.13964	0.00461004	-0.0289611	-0.00610151	0.00712026	0.00678026	0.00251946	0.00910323	0.00399508	-0.202854	-0.279763	0.0309645	-0.10713	-0.00258848	-0.38844	0.0197673	-0.242664	-0.174561	-0.0642828	-0.360619	-0.350306	-0.268694	-0.248102	0.066634	-0.143849	-0.313589	-0.0301283	-0.347594	-0.340862	-0.368869	-0.20155	-0.19795	-0.369765	-0.28052	-0.0773688	-0.286741	0.0804123	0.240372	-0.106701	-0.239629	-0.401924	0.101228	-0.000300272
Ruminiclostridium herbifermentans	-0.795402	-0.288642	0.484207	0.507778	0.202081	0.460823	0.335779	0.495064	0.459967	0.479824	0.491605	0.495298	0.491582	0.500481	0.491639	-0.164608	-0.215122	0.435933	0.301319	0.473394	-0.297871	0.448833	-0.0543921	0.112144	0.417287	-0.34265	-0.321833	-0.30132	-0.229553	0.282265	-0.159129	-0.284905	-0.125589	-0.35032	-0.371354	-0.274773	-0.257786	-0.103584	-0.346999	-0.29408	-0.00817257	-0.169886	-0.102661	0.143714	-0.105782	-0.192814	-0.408493	-0.0326145	0.232565
Ethanoligenens harbinense	-0.745882	-0.404391	0.0145201	0.0275103	-0.212418	0.00682988	-0.12077	0.0242491	-0.008539	0.0150676	0.0219403	0.0253992	0.0226341	0.0289969	0.0226283	-0.197395	-0.170556	0.0410169	-0.0863704	0.0315365	-0.380373	-0.0116905	-0.252945	-0.159814	-0.0440595	-0.353075	-0.294266	-0.250799	-0.264804	0.235011	-0.0672567	-0.298534	-0.117468	-0.338337	-0.306617	-0.355038	-0.101906	-0.194771	-0.33618	-0.281881	-0.0861344	-0.284318	-0.177175	0.421371	-0.206835	-0.23622	-0.374127	-0.0310632	0.110945
Mageeibacillus indolicus	-0.732329	-0.388434	-0.034591	-0.00992758	-0.251653	-0.045554	-0.164261	-0.0249356	-0.0570166	-0.0324828	-0.0208426	-0.0237163	-0.0279667	-0.0216313	-0.0253315	-0.203881	-0.292492	0.318708	-0.0990877	-0.0425523	-0.3744	-0.0225966	-0.25696	-0.176179	-0.090173	-0.335376	-0.327008	-0.262688	-0.229761	0.126276	-0.170172	-0.298074	-0.0720745	-0.341681	-0.326659	-0.359677	-0.179826	-0.22402	-0.352308	-0.279838	-0.0691927	-0.277808	-0.0373	0.320616	-0.149694	-0.176598	-0.386557	0.0464157	-0.0161175
Lachnoclostridium phytofermentans	-0.806206	-0.419148	0.00490593	0.0362212	-0.23527	-0.0151113	-0.136564	0.0149369	-0.020615	0.00450722	0.0179962	0.0170227	0.0122383	0.0194842	0.0146184	-0.198024	-0.293027	0.0314757	-0.103538	0.00185925	-0.405671	0.0167864	-0.254982	-0.175226	-0.0539693	-0.380184	-0.335824	-0.277722	-0.249802	0.0714544	-0.167546	-0.314807	-0.090838	-0.374633	-0.349444	-0.376601	-0.202752	-0.202927	-0.377059	-0.2951	-0.0385344	-0.289781	0.0150675	0.245957	-0.150192	-0.255444	-0.416429	0.0319503	0.0162363
Coprococcus sp. ART55/1	-0.704006	-0.374884	-0.048864	-0.0293794	-0.255261	-0.0531398	-0.172207	-0.0398791	-0.0698028	-0.0454318	-0.0357584	-0.0384292	-0.0413109	-0.0361551	-0.0401018	-0.170284	-0.304972	-0.0160014	-0.128108	-0.043692	-0.368356	-0.0555635	-0.258035	-0.180495	-0.0996842	-0.329785	-0.278024	-0.244003	-0.219128	0.186694	-0.101893	-0.257362	-0.131237	-0.323093	-0.304455	-0.344779	-0.129893	-0.190794	-0.33064	-0.258905	-0.00484874	-0.267213	-0.102769	0.375439	-0.217909	-0.217458	-0.364505	-0.0197326	0.0844911
Butyrivibrio proteoclasticus	-0.721094	-0.364826	0.000942649	0.0186233	-0.211959	-0.00111653	-0.124592	0.0101507	-0.0206879	0.00358311	0.0145243	0.0113523	0.00899951	0.0142652	0.00902976	-0.17555	-0.282535	-0.0231657	-0.0950327	0.0121046	-0.360782	-0.0125591	-0.244806	-0.161118	-0.0539574	-0.333617	-0.29842	-0.252435	-0.222658	0.236722	-0.0777969	-0.25664	-0.115581	-0.322058	-0.321816	-0.343426	-0.134567	-0.189592	-0.341851	-0.267994	0.0175081	-0.271187	-0.119588	0.400142	-0.215874	-0.231261	-0.372017	-0.014686	0.12718
Pseudobutyrivibrio xylanivorans	-0.715108	-0.331396	-0.0417087	-0.0244388	-0.24662	-0.0418972	-0.162151	-0.032325	-0.0630034	-0.0394338	-0.0222241	-0.0312318	-0.0331733	-0.0283863	-0.0333706	-0.169033	-0.312235	-0.0334749	-0.125748	-0.0289207	-0.360115	-0.053216	-0.25854	-0.185433	-0.0924537	-0.331993	-0.298883	-0.244053	-0.189424	0.18482	-0.0807982	-0.232497	-0.141156	-0.322435	-0.325104	-0.346882	-0.137722	-0.196994	-0.344345	-0.263966	0.173142	-0.270767	-0.13596	0.359161	-0.241763	-0.232039	-0.368871	-0.0629724	0.1199
A1erotignum propionicum	-0.485662	-0.279336	-0.028182	-0.0271848	-0.171131	-0.0686715	-0.117975	-0.0222573	-0.0454072	-0.039367	-0.0358298	-0.0203267	-0.0265014	-0.0197104	-0.0235517	-0.14198	-0.0715755	-0.0206577	-0.0961245	-0.0145729	-0.254131	-0.0564896	-0.117429	-0.126494	-0.0532248	-0.239857	-0.113522	-0.0332384	-0.213154	-0.228026	-0.109027	-0.261399	0.00721899	-0.259872	-0.0500854	-0.185232	-0.00597232	-0.076451	-0.120362	-0.177669	-0.109537	-0.189076	-0.189803	-0.0177412	-0.0200938	-0.176264	-0.160045	-0.0770816	-0.194629
Herbinix luporum	-0.773438	-0.398868	0.0283238	0.0487455	-0.204676	0.0206418	-0.108739	0.0382704	0.00477338	0.0296996	0.0398019	0.0395697	0.036616	0.0427246	0.0370063	-0.193919	-0.273529	0.0704112	-0.0755343	0.0381511	-0.384838	0.0168877	-0.246786	-0.155306	-0.031091	-0.357458	-0.323952	-0.270001	-0.250834	0.222417	-0.10067	-0.293414	-0.103201	-0.347053	-0.339234	-0.364284	-0.155788	-0.198647	-0.362176	-0.288468	-0.043998	-0.284536	-0.104961	0.386908	-0.19742	-0.234438	-0.397996	0.00266297	0.107814
Cellulosilyticum lentocellum	-0.721204	-0.393221	-0.0249834	0.00661687	-0.235851	-0.0422175	-0.151514	-0.0164693	-0.0473407	-0.0238541	-0.0140996	-0.014386	-0.0189859	-0.0131008	-0.0161958	-0.171465	-0.341485	0.027983	-0.115182	-0.0320309	-0.367861	-0.00308887	-0.233209	-0.173141	-0.0767223	-0.33615	-0.32239	-0.254334	-0.230964	0.0685068	-0.169064	-0.289995	-0.052508	-0.328718	-0.325497	-0.347116	-0.211178	-0.186404	-0.355764	-0.266059	-0.103721	-0.270304	0.0618143	0.236121	-0.133926	-0.224646	-0.381954	0.0698367	-0.00438327
Alkalibacter sp. ES005	-0.837606	-0.386493	0.176828	0.195688	-0.0915752	0.161479	0.0247589	0.187949	0.151218	0.175859	0.187662	0.188863	0.185212	0.193067	0.185851	-0.196904	-0.235127	0.199134	0.0408743	0.182346	-0.387717	0.14619	-0.200729	-0.0810345	0.113592	-0.38348	-0.341396	-0.287332	-0.259972	0.240047	-0.13978	-0.313999	-0.140142	-0.377846	-0.362556	-0.360746	-0.191372	-0.179142	-0.375245	-0.313032	0.000136165	-0.267555	-0.175019	0.324686	-0.198535	-0.241595	-0.424702	-0.0616503	0.150059
Clostridium sp. C5S11	-0.812831	-0.377343	0.217213	0.250794	-0.0493304	0.190833	0.0668796	0.227652	0.191731	0.215586	0.229372	0.229122	0.222823	0.232138	0.226516	-0.199389	-0.270955	0.2996	0.0810813	0.19452	-0.369033	0.224795	-0.167854	-0.048275	0.15286	-0.367898	-0.364514	-0.302675	-0.244842	0.122604	-0.235948	-0.32895	-0.0812022	-0.374779	-0.374311	-0.34427	-0.266882	-0.173038	-0.378924	-0.305105	-0.0689717	-0.242753	0.0301417	0.159644	-0.0919866	-0.208309	-0.434002	0.0572047	0.0357774
Clostridium sp. BJN0001	-0.714071	-0.335961	0.0327082	0.0480396	-0.190398	0.0244181	-0.0949104	0.0435421	0.0105158	0.0319259	0.0456078	0.0431664	0.042814	0.0478509	0.0419372	-0.191631	-0.159253	0.680992	-0.0144378	0.0475367	-0.349404	0.0155214	-0.227057	-0.127814	-0.0160595	-0.319126	-0.334472	-0.260939	-0.210064	0.165004	-0.140739	-0.274602	-0.129072	-0.320858	-0.332606	-0.349731	-0.18643	-0.215173	-0.345191	-0.274124	0.0646864	-0.244981	-0.190638	0.298701	-0.196043	-0.108009	-0.38408	-0.107458	0.0890251
Clostridium cadaveris	-0.837283	-0.356683	-0.0589672	-0.0298728	-0.300889	-0.0799101	-0.201625	-0.0475979	-0.0836006	-0.0619814	-0.0304713	-0.0458784	-0.0512859	-0.0428977	-0.0479136	-0.214659	-0.258725	0.12294	-0.131715	-0.0658219	-0.424459	-0.0384852	-0.284061	-0.208475	-0.111096	-0.39971	-0.365687	-0.25893	-0.187615	-0.0694077	-0.222214	-0.299603	-0.152094	-0.391718	-0.359922	-0.398975	-0.206389	-0.220199	-0.387892	-0.300646	0.340615	-0.288137	-0.0604377	0.116499	-0.196781	-0.255778	-0.430398	-0.0928385	-0.0567804
Clostridium septicum	-0.600735	-0.196754	0.590732	0.606555	0.347155	0.56905	0.469093	0.599711	0.573199	0.586265	0.590302	0.598915	0.596619	0.604388	0.595857	-0.131233	-0.0694155	0.711277	0.431817	0.581057	-0.191737	0.546914	0.0568058	0.226221	0.535824	-0.250637	-0.265469	-0.246351	-0.182367	0.325574	-0.153815	-0.233562	-0.0842223	-0.258557	-0.288296	-0.181381	-0.23782	-0.0446987	-0.249016	-0.222229	-0.104794	-0.0751319	-0.118229	0.0914627	-0.0219011	-0.082369	-0.317214	-0.0155688	0.245369
Clostridium isatidis	-0.74311	-0.37228	0.109213	0.124201	-0.131548	0.090988	-0.0292927	0.120068	0.0856771	0.106646	0.113411	0.120007	0.11856	0.124594	0.118374	-0.190153	-0.135164	0.687175	0.0360694	0.117275	-0.355942	0.0818261	-0.206089	-0.0902337	0.054873	-0.335411	-0.308769	-0.26931	-0.255682	0.160266	-0.145339	-0.317156	-0.138894	-0.336642	-0.322178	-0.340997	-0.181261	-0.19359	-0.341876	-0.287464	-0.104152	-0.240354	-0.202344	0.270128	-0.179202	-0.126649	-0.385888	-0.105021	0.0829793
Clostridium baratii	-0.686099	-0.329046	0.0876229	0.102258	-0.13407	0.0783641	-0.0390972	0.0978113	0.0666099	0.08826	0.0976249	0.0974774	0.0963741	0.101894	0.0965559	-0.17695	-0.13077	0.644304	0.0288606	0.0918323	-0.329737	0.0656014	-0.201975	-0.0879386	0.0379022	-0.308348	-0.313331	-0.264264	-0.211148	0.207972	-0.155812	-0.271429	-0.144621	-0.307144	-0.324368	-0.326825	-0.190274	-0.195483	-0.331931	-0.265935	-0.0175429	-0.223761	-0.193474	0.303998	-0.189853	-0.111028	-0.374259	-0.0992138	0.100472
Clostridium kluyveri	-0.824991	-0.424027	0.0114627	0.0503934	-0.236214	-0.0276681	-0.136123	0.0217442	-0.0160572	0.00560466	0.0235417	0.0241548	0.0171778	0.0262704	0.0216855	-0.21526	-0.23205	0.22854	-0.0906516	-0.00777601	-0.409954	0.0458473	-0.244221	-0.176248	-0.0475179	-0.386877	-0.36695	-0.275911	-0.259139	-0.141135	-0.259387	-0.364511	-0.0467944	-0.39396	-0.35032	-0.378841	-0.259119	-0.207869	-0.388176	-0.309398	-0.0538794	-0.290573	0.107267	0.0263804	-0.0688071	-0.230372	-0.428198	0.0489329	-0.138895
Clostridium chauvoei	-0.609467	-0.301148	0.0383038	0.0531914	-0.156569	0.0277785	-0.0746291	0.0474994	0.0194402	0.0394695	0.0478426	0.047096	0.0455251	0.0505964	0.0470171	-0.162769	-0.120359	0.727781	0.00742817	0.031455	-0.298897	0.0275952	-0.198434	-0.0966468	-0.00461123	-0.269715	-0.281165	-0.240614	-0.187493	0.140116	-0.179761	-0.252874	-0.130615	-0.279518	-0.290785	-0.296908	-0.183767	-0.193702	-0.300589	-0.241615	-0.043795	-0.20287	-0.158121	0.247847	-0.164312	-0.0694534	-0.337979	-0.0886009	0.0297874
Clostridium manihotivorum	-0.817541	-0.408673	0.0284135	0.0465146	-0.218878	0.0195112	-0.1161	0.0396381	0.00294387	0.0272474	0.0406941	0.0403734	0.0390645	0.0448024	0.0376609	-0.208529	-0.266964	0.294183	-0.0656459	0.0470545	-0.402555	0.00757685	-0.265354	-0.164899	-0.0332226	-0.377085	-0.33484	-0.286078	-0.259749	0.201171	-0.0897215	-0.313477	-0.139444	-0.363212	-0.357757	-0.388378	-0.155934	-0.218021	-0.381118	-0.307738	0.0264518	-0.29502	-0.172161	0.372616	-0.227308	-0.211433	-0.419522	-0.0681264	0.124691
Clostridium argentinense	-0.610709	-0.314001	-0.00416884	0.00712466	-0.182116	0.00670908	-0.10875	0.00405184	-0.0210733	0.00083975	0.00817768	0.00443184	0.00461646	0.00755132	0.00268217	-0.153897	-0.255699	0.109848	-0.0713409	0.0155113	-0.302722	-0.0226871	-0.220158	-0.133931	-0.0533236	-0.274429	-0.258849	-0.231987	-0.190296	0.338591	-0.0149319	-0.203572	-0.10706	-0.259485	-0.288865	-0.299411	-0.0949805	-0.178139	-0.298269	-0.225028	-0.00363687	-0.232111	-0.151185	0.481023	-0.22078	-0.171391	-0.319672	-0.00643669	0.189625
Clostridium sporogenes	-0.63406	-0.332858	-0.00165639	0.0260094	-0.198382	-0.0278839	-0.117596	0.00761656	-0.0226373	-0.00555262	0.00524107	0.00792368	0.0060329	0.0110014	0.00763573	-0.169719	-0.137461	0.824884	-0.0259572	-0.0110304	-0.317281	0.0193099	-0.206869	-0.126268	-0.0448035	-0.284777	-0.302742	-0.249048	-0.203789	-0.0641791	-0.212898	-0.294257	-0.0836014	-0.292992	-0.300474	-0.314414	-0.23493	-0.198211	-0.32314	-0.245464	-0.0935661	-0.210439	0.00663579	0.0584163	-0.0935619	-0.0627911	-0.352896	-0.0399351	-0.0735525
Geosporobacter ferrireducens	-0.749929	-0.374921	0.153584	0.168898	-0.0869943	0.146945	0.01693	0.163259	0.132541	0.15506	0.166036	0.164166	0.160981	0.168044	0.161213	-0.186603	-0.238357	0.106898	0.0333972	0.159958	-0.352782	0.124994	-0.193865	-0.0789429	0.0923378	-0.347354	-0.284704	-0.263817	-0.248734	0.307094	-0.0892721	-0.288891	-0.133008	-0.324714	-0.320731	-0.32947	-0.130422	-0.161415	-0.324152	-0.281408	-0.0755016	-0.248125	-0.143366	0.399023	-0.171017	-0.229623	-0.382201	-0.0172377	0.172922
Mogibacterium pumilum	-0.480145	-0.164123	-0.00208322	-0.0370425	-0.172098	-0.0139087	-0.0916303	-0.00600785	-0.0742167	0.0117159	0.0203852	-0.00112391	0.0070056	-0.0429841	0.0188932	0.332883	-0.227432	0.120286	-0.117378	-0.0752709	-0.321501	-0.0612877	-0.232854	-0.170577	-0.0908796	-0.195105	-0.280492	-0.222116	-0.159363	-0.17624	-0.235809	-0.237045	-0.226887	-0.305204	-0.297882	-0.306056	-0.24504	-0.188819	-0.328994	-0.246458	0.282442	-0.227994	-0.148974	-0.0548183	-0.258166	-0.0857349	-0.267882	-0.248563	-0.0952321
Aminipila terrae	-0.722662	-0.351859	0.0228081	0.0471109	-0.201629	-0.00280461	-0.107966	0.033028	-0.000616244	0.0199615	0.0324373	0.0335007	0.0313642	0.0371998	0.0330129	-0.162532	-0.14993	0.599421	-0.0339838	0.0159492	-0.355339	0.0201462	-0.22675	-0.136482	-0.0227336	-0.331346	-0.316451	-0.268798	-0.21642	-0.0125018	-0.220287	-0.296889	-0.161857	-0.334677	-0.336365	-0.343765	-0.244141	-0.19682	-0.360518	-0.278018	0.00713936	-0.236735	-0.107259	0.104205	-0.183968	-0.133511	-0.39238	-0.143388	0.00165654
Aminipila luticellarii	-0.781677	-0.393671	-0.0350313	-0.0138479	-0.270189	-0.0582703	-0.174419	-0.0239101	-0.0603619	-0.0373071	-0.0242091	-0.0233934	-0.0261976	-0.019818	-0.0242309	-0.193383	-0.184666	0.630489	-0.0847232	-0.0383936	-0.394523	-0.0416775	-0.272031	-0.184136	-0.0851235	-0.357007	-0.329286	-0.272729	-0.243143	0.00337488	-0.210574	-0.327809	-0.157398	-0.366475	-0.342223	-0.376335	-0.214744	-0.231249	-0.376425	-0.303002	-0.000643818	-0.277329	-0.159932	0.191263	-0.205208	-0.147093	-0.40896	-0.139845	-0.0252196
Emergencia timonensis	-0.845479	-0.393952	-0.0223741	0.000116649	-0.271984	-0.031454	-0.169179	-0.0106437	-0.0458393	-0.0218105	-0.000119588	-0.00951563	-0.0131137	-0.00586413	-0.0113974	-0.223538	-0.248855	0.246572	-0.09125	-0.0171541	-0.427069	-0.0201025	-0.282074	-0.179787	-0.0793512	-0.392686	-0.36125	-0.273491	-0.22562	0.140603	-0.161651	-0.306384	-0.145205	-0.381438	-0.361124	-0.404223	-0.170934	-0.224821	-0.384805	-0.303127	0.167011	-0.291069	-0.141067	0.328469	-0.225251	-0.231322	-0.433028	-0.0631104	0.0438314
Flintibacter sp. KGMB00164	-0.476944	-0.0650876	0.933688	0.94389	0.706218	0.917008	0.833012	0.939715	0.921966	0.92768	0.930131	0.939595	0.935615	0.944758	0.93338	-0.0798425	-0.104831	0.0390031	0.665196	0.929604	-0.0615429	0.866876	0.264932	0.443131	0.877828	-0.192965	-0.184983	-0.170923	-0.130313	0.505934	-0.0475499	-0.144429	0.00142304	-0.183502	-0.206194	-0.0346542	-0.175314	0.115516	-0.130792	-0.150836	-0.0514795	0.0341231	-0.0634777	0.0510417	0.0942521	-0.167411	-0.215723	0.111172	0.421489
Romboutsia hominis	-0.751966	-0.340744	0.0584743	0.0778874	-0.171211	0.033434	-0.0796813	0.0687558	0.0329606	0.0546315	0.0705943	0.0694409	0.0658948	0.0740393	0.067549	-0.170734	-0.176181	0.371794	-0.0357964	0.0542809	-0.34749	0.0351803	-0.238188	-0.13791	0.00465037	-0.34928	-0.342762	-0.291378	-0.229851	0.0343759	-0.196601	-0.294535	-0.19347	-0.357933	-0.365929	-0.356688	-0.256235	-0.205026	-0.387865	-0.307971	0.0944387	-0.271683	-0.190656	0.132854	-0.236362	-0.200158	-0.427367	-0.178745	0.0252378
Terrisporobacter sp. MCA3	-0.665109	-0.330439	-0.0449753	-0.0212739	-0.245559	-0.0689308	-0.164593	-0.0359132	-0.066876	-0.0464195	-0.0344115	-0.0351326	-0.037813	-0.0323966	-0.0352205	-0.140354	-0.183202	0.422333	-0.0925497	-0.0560906	-0.340361	-0.043667	-0.238008	-0.16783	-0.0843482	-0.311704	-0.289734	-0.24918	-0.194661	-0.0515615	-0.219757	-0.26647	-0.175786	-0.315497	-0.316074	-0.331251	-0.232305	-0.192278	-0.345031	-0.259729	0.0317515	-0.234013	-0.0924974	0.0869598	-0.204055	-0.146103	-0.368872	-0.153235	-0.0234297
Peptacetobacter hiranonis	-0.701035	-0.147195	0.726305	0.743595	0.453217	0.70494	0.593641	0.735786	0.705735	0.720364	0.739003	0.735722	0.730199	0.74114	0.730446	-0.14257	-0.183028	0.211957	0.488156	0.712084	-0.196762	0.673419	0.0994629	0.269449	0.662742	-0.292087	-0.30401	-0.241772	-0.151837	0.353066	-0.166582	-0.211868	-0.0727521	-0.306834	-0.321347	-0.171532	-0.255594	-0.015387	-0.263944	-0.250138	0.200186	-0.0869593	-0.122369	0.0531797	-0.0133178	-0.201001	-0.345825	0.00197042	0.29449
Paeniclostridium sordellii	-0.394133	-0.210046	-0.0187167	0.00026473	-0.136883	-0.0436981	-0.0901814	-0.0142589	-0.0326091	-0.0207439	-0.0187306	-0.0130242	-0.0154427	-0.0123423	-0.0128466	-0.0411384	-0.180516	0.0316648	-0.0710349	-0.0323556	-0.200912	-0.0180747	-0.122987	-0.10084	-0.0366426	-0.186406	-0.146493	-0.1429	-0.132122	-0.120584	-0.155005	-0.161518	-0.122829	-0.188834	-0.183028	-0.182248	-0.174462	-0.076621	-0.210607	-0.152809	-0.057344	-0.133341	-0.0121074	-0.0615586	-0.136162	-0.121098	-0.215992	-0.123721	-0.0187485
Peptoclostridium acidaminophilum	-0.81902	-0.354459	0.12417	0.15714	-0.126413	0.108216	-0.0175183	0.134635	0.0995268	0.123163	0.146796	0.136282	0.130713	0.138983	0.133085	-0.213654	-0.330552	0.119204	-0.000747971	0.115591	-0.378384	0.142416	-0.199904	-0.106595	0.0609398	-0.374065	-0.385003	-0.281901	-0.205888	0.120343	-0.192341	-0.296716	-0.0507788	-0.371482	-0.375552	-0.359342	-0.238253	-0.194038	-0.380703	-0.296008	0.135673	-0.266226	0.0455921	0.214962	-0.101756	-0.245238	-0.426252	0.081944	0.0371756
Filifactor alocis	-0.658114	-0.13318	0.021227	0.0335716	-0.154627	0.0179896	-0.0765286	0.0315976	0.00176227	0.01751	0.0563346	0.0314403	0.0286883	0.0351604	0.0290988	-0.168628	-0.216922	0.346447	-0.0351093	0.0232604	-0.270469	0.0127652	-0.20645	-0.13144	-0.021167	-0.267632	-0.28538	-0.190865	-0.0782847	0.00354597	-0.110075	-0.149351	-0.112623	-0.319052	-0.302587	-0.265861	-0.160911	-0.19607	-0.299701	-0.24755	0.628077	-0.215913	-0.199422	0.101659	-0.18869	-0.158959	-0.315473	-0.161582	0.0243436
Acetoa1erobium sticklandii	-0.68907	-0.35818	-0.0601239	-0.0382248	-0.263546	-0.0660462	-0.180178	-0.0508554	-0.0813016	-0.0552633	-0.0440935	-0.0497862	-0.053454	-0.0477663	-0.0503802	-0.177435	-0.273305	0.224303	-0.116734	-0.0704241	-0.360155	-0.05819	-0.263851	-0.176492	-0.10922	-0.315194	-0.274728	-0.25065	-0.198248	0.151549	-0.163805	-0.252121	-0.134662	-0.329441	-0.304873	-0.336994	-0.153964	-0.215466	-0.322261	-0.258225	-0.00254005	-0.255388	-0.081416	0.346434	-0.188771	-0.172044	-0.364722	-0.0144072	0.019557
Christensenella minuta	-0.611266	-0.173278	0.755053	0.775563	0.498749	0.723736	0.631979	0.761095	0.729499	0.751069	0.755276	0.762399	0.758544	0.76016	0.760628	-0.0455609	-0.197099	0.24757	0.511144	0.723916	-0.175476	0.719474	0.139973	0.30441	0.687752	-0.254682	-0.270464	-0.241667	-0.181615	0.278504	-0.179378	-0.236521	-0.0265612	-0.26764	-0.29433	-0.147481	-0.289871	0.0231688	-0.247136	-0.215578	-0.114081	-0.0513988	0.062194	-0.0559074	0.0630502	-0.165559	-0.309267	0.0967471	0.24809
Desulfitobacterium hafniense	-0.675757	-0.211381	0.75564	0.78014	0.482635	0.717962	0.620361	0.763858	0.735089	0.746822	0.752737	0.764933	0.758437	0.76947	0.7593	-0.12554	-0.135015	0.0753744	0.494444	0.739822	-0.198459	0.714248	0.132539	0.289519	0.692468	-0.295263	-0.271578	-0.232826	-0.210414	0.265133	-0.162708	-0.259255	-0.0225479	-0.294438	-0.286091	-0.157095	-0.258366	0.0293292	-0.247095	-0.235177	-0.11428	-0.0751478	0.00957555	-0.0465642	0.0613536	-0.222951	-0.32519	0.0796092	0.252565
Desulfosporosinus orientis	-0.692016	-0.384741	-0.0489044	-0.0313016	-0.250658	-0.0488959	-0.16794	-0.0397097	-0.0697787	-0.0455206	-0.0381797	-0.0384429	-0.0395677	-0.0355565	-0.0405432	-0.18223	-0.260626	0.0415183	-0.125075	-0.0270512	-0.365063	-0.0598728	-0.258896	-0.175688	-0.101883	-0.327769	-0.25796	-0.238196	-0.225615	0.243972	-0.0357009	-0.250995	-0.108143	-0.313446	-0.286355	-0.342904	-0.0879517	-0.196742	-0.30929	-0.245547	-0.0550456	-0.26465	-0.0952862	0.452759	-0.189542	-0.214036	-0.347972	0.0161714	0.123748
Dehalobacter restrictus	-0.567361	-0.128534	0.825829	0.839229	0.584696	0.815728	0.713978	0.833291	0.811356	0.821976	0.826053	0.833096	0.831109	0.83852	0.827367	-0.0989797	-0.176461	0.140438	0.576732	0.830164	-0.123028	0.76407	0.177582	0.361314	0.763845	-0.231551	-0.223256	-0.220146	-0.155993	0.546138	-0.0213977	-0.168652	-0.0337819	-0.215113	-0.265735	-0.105563	-0.184842	0.0549615	-0.198492	-0.184727	-0.044029	-0.0216529	-0.0713979	0.167446	0.0229332	-0.176386	-0.271525	0.0927796	0.451174
Candidatus Desulforudis audaxviator	-0.27846	0.0446427	0.989376	0.996539	0.815823	0.97255	0.922535	0.992765	0.983403	0.983259	0.98177	0.992283	0.988616	0.996467	0.986719	-0.025171	-0.0311888	0.0522608	0.733122	0.976039	0.0486237	0.925761	0.354079	0.519168	0.94638	-0.0959078	-0.10503	-0.112098	-0.0676611	0.473548	-0.0350717	-0.0700899	0.038315	-0.0923573	-0.128371	0.0711822	-0.155809	0.174961	-0.040257	-0.0779802	-0.085573	0.119338	-0.00333627	-0.0630655	0.170947	-0.102193	-0.117147	0.137556	0.406372
Vallitalea guaymasensis	-0.811851	-0.317547	-0.0586315	-0.0317499	-0.284479	-0.0773192	-0.188834	-0.0475195	-0.0846865	-0.0616669	-0.0292271	-0.045922	-0.0507291	-0.0432521	-0.0483961	-0.200277	-0.316557	0.0876971	-0.1444	-0.0598024	-0.39498	-0.0487053	-0.271673	-0.214813	-0.109736	-0.374676	-0.335671	-0.240622	-0.165708	-0.0779043	-0.18857	-0.262198	-0.12789	-0.392781	-0.343422	-0.366111	-0.201838	-0.223116	-0.366521	-0.293171	0.402613	-0.288148	-0.0722309	0.120314	-0.178078	-0.251737	-0.40069	-0.0929967	-0.0404182
Streptococcus sp. FDAARGOS_192	-0.411761	-0.222913	-0.0155896	0.00266582	-0.141424	-0.0429647	-0.0909235	-0.0108819	-0.0299895	-0.0181299	-0.0160407	-0.00964431	-0.0123512	-0.0086816	-0.00947654	-0.0476807	-0.126483	0.0334006	-0.0701339	-0.0286442	-0.213017	-0.0178025	-0.126152	-0.10177	-0.0336619	-0.199389	-0.1495	-0.141677	-0.137821	-0.129126	-0.167926	-0.17332	-0.129202	-0.199669	-0.180458	-0.187507	-0.170809	-0.078443	-0.211492	-0.157479	-0.0574932	-0.136446	-0.0297113	-0.0652852	-0.133717	-0.127949	-0.21944	-0.139138	-0.0258987
Streptococcus sp. oral taxon 061	-0.635486	-0.13477	0.19757	0.20941	0.00404457	0.200257	0.0963713	0.206923	0.179224	0.198136	0.230681	0.206614	0.202484	0.210231	0.204065	-0.158166	-0.258346	0.191022	0.094833	0.183804	-0.243087	0.177404	-0.127864	-0.0248806	0.149591	-0.262469	-0.275	-0.209084	-0.0757501	0.211319	-0.136923	-0.142477	-0.120658	-0.296521	-0.301966	-0.229508	-0.159465	-0.153256	-0.274986	-0.237734	0.511042	-0.174922	-0.181409	0.20237	-0.159373	-0.168415	-0.312821	-0.0750773	0.12208
Streptococcus sp. oral taxon 431	-0.69414	-0.163019	0.168556	0.18427	-0.0308037	0.163887	0.0630387	0.179455	0.147573	0.165969	0.195812	0.17881	0.176416	0.183596	0.176587	-0.158861	-0.224481	0.528164	0.0837845	0.161999	-0.260779	0.153118	-0.152145	-0.0525976	0.120274	-0.271089	-0.288129	-0.237061	-0.112533	0.131035	-0.123236	-0.16818	-0.107672	-0.321877	-0.333325	-0.24677	-0.207678	-0.177777	-0.318627	-0.261973	0.435583	-0.193753	-0.188562	0.132674	-0.174644	-0.133509	-0.331551	-0.119504	0.108278
Streptococcus sp. oral taxon 064	-0.633853	-0.257099	0.178833	0.198248	-0.0280258	0.157247	0.0640692	0.186928	0.15892	0.177557	0.187161	0.187846	0.183629	0.190304	0.186338	-0.110095	-0.244348	0.11318	0.0617561	0.165466	-0.278624	0.156974	-0.114672	-0.0361675	0.138476	-0.281898	-0.259547	-0.215748	-0.176561	0.082509	-0.192347	-0.220324	-0.129755	-0.296711	-0.286598	-0.250602	-0.226271	-0.107489	-0.294283	-0.24032	0.0517579	-0.18183	-0.11795	0.088206	-0.160884	-0.181496	-0.327689	-0.105879	0.0876345
Streptococcus sp. 116-D4	-0.626363	-0.0946982	0.75791	0.773499	0.514106	0.745888	0.646027	0.766776	0.740122	0.752611	0.769562	0.765955	0.762324	0.772121	0.76092	-0.116994	-0.178883	0.305089	0.529669	0.745848	-0.140013	0.705856	0.136202	0.304736	0.699162	-0.242001	-0.253789	-0.233802	-0.118296	0.429891	-0.105582	-0.155117	-0.0520338	-0.258798	-0.297775	-0.114068	-0.232703	0.003293	-0.229441	-0.218179	0.20068	-0.0451309	-0.108038	0.0720084	-0.00338386	-0.154033	-0.290325	0.0340057	0.360515
Streptococcus sp. HSISS1	-0.579497	-0.165388	0.699925	0.71587	0.453393	0.660499	0.581737	0.707443	0.681467	0.691266	0.695698	0.708141	0.702224	0.713245	0.703696	-0.100268	0.0688498	0.0377716	0.463776	0.691227	-0.171259	0.641264	0.142919	0.283943	0.652302	-0.264883	-0.210166	-0.17737	-0.167993	0.200567	-0.182599	-0.210246	-0.069495	-0.268742	-0.215804	-0.117936	-0.221448	0.0457358	-0.17872	-0.193533	-0.0339357	-0.0404431	-0.0921691	-0.0890543	0.0544505	-0.201384	-0.26761	-0.0333124	0.227244
Streptococcus sp. NSJ-72	-0.526623	-0.110335	0.00197097	0.0174679	-0.152486	-0.0123913	-0.0824491	0.0106834	-0.0153014	-0.00284935	0.0322163	0.0104688	0.00780228	0.0135062	0.00965197	-0.129958	-0.14863	0.422892	-0.0306811	-0.00980336	-0.238901	0.0036269	-0.17011	-0.115234	-0.026682	-0.232838	-0.251852	-0.170052	-0.0450743	-0.139818	-0.190303	-0.14248	-0.151863	-0.262048	-0.257945	-0.232584	-0.186939	-0.161959	-0.255409	-0.204818	0.568395	-0.161453	-0.130447	-0.0750081	-0.15314	-0.100468	-0.279338	-0.203266	-0.0471596
Streptococcus sp. NPS 308	-0.668434	-0.150632	0.175923	0.193299	-0.0207392	0.167045	0.0717354	0.185845	0.155757	0.173638	0.205936	0.186018	0.18251	0.190143	0.183662	-0.142299	-0.179159	0.219662	0.0708024	0.162858	-0.253053	0.162896	-0.141342	-0.0463738	0.129396	-0.282125	-0.284703	-0.223127	-0.0908599	0.0643461	-0.157378	-0.160086	-0.142632	-0.315524	-0.328327	-0.243939	-0.21386	-0.149777	-0.308803	-0.24841	0.509535	-0.181377	-0.155788	0.0552122	-0.168271	-0.192053	-0.333349	-0.150779	0.0935448
Streptococcus sp. 1643	-0.648586	-0.163816	0.103726	0.119426	-0.0950099	0.0957801	-0.00290141	0.113706	0.0836567	0.10076	0.137305	0.113332	0.110756	0.117294	0.111553	-0.165606	-0.209631	0.4193	0.0366297	0.0951246	-0.277675	0.094608	-0.169389	-0.0783557	0.0605052	-0.284251	-0.301097	-0.2157	-0.0756268	0.0323562	-0.19044	-0.180416	-0.164627	-0.302655	-0.311421	-0.274972	-0.191312	-0.177099	-0.29676	-0.242639	0.56759	-0.185985	-0.162782	0.0736968	-0.16307	-0.13487	-0.340798	-0.158878	0.0423436
Streptococcus sp. DAT741	-0.473486	-0.0874866	0.813315	0.820593	0.598285	0.811714	0.716719	0.819643	0.802214	0.811188	0.811463	0.819236	0.818108	0.824815	0.813515	-0.08425	-0.112901	0.0326078	0.572249	0.823755	-0.0834976	0.744286	0.194435	0.37081	0.754938	-0.194939	-0.192021	-0.196269	-0.133189	0.608728	0.0213113	-0.118924	-0.0282614	-0.179834	-0.232403	-0.0769483	-0.148382	0.0671932	-0.1611	-0.154973	-0.0564951	-0.0011265	-0.10416	0.222835	0.0162683	-0.164885	-0.229379	0.102735	0.484333
Streptococcus sp. CNU 77-61	-0.231195	0.0761739	0.998063	0.991099	0.831223	0.9854	0.937797	0.99824	0.979518	0.996313	0.99223	0.998629	0.99802	0.99193	0.998353	0.0906503	-0.0212791	0.0507227	0.731703	0.969187	0.0535898	0.921033	0.350979	0.520017	0.942027	-0.0668501	-0.112388	-0.115337	-0.0638879	0.460252	-0.0441529	-0.0676468	0.0234296	-0.0882878	-0.133371	0.0703978	-0.169203	0.168258	-0.0432956	-0.0772912	-0.0646588	0.12141	-0.0130537	-0.0809523	0.155602	-0.0751175	-0.0997486	0.119263	0.394899
Streptococcus constellatus	-0.335377	0.0274558	0.968128	0.977777	0.779076	0.949304	0.892327	0.972349	0.960061	0.961798	0.963526	0.971857	0.968063	0.97637	0.966563	-0.0318972	-0.0456442	0.0884635	0.712347	0.952418	0.0189601	0.905596	0.325888	0.493923	0.923741	-0.122628	-0.133613	-0.135125	-0.0723741	0.442089	-0.0665711	-0.0844997	0.00559611	-0.121657	-0.163127	0.0405656	-0.18762	0.154284	-0.0758314	-0.10149	-0.0247568	0.0995416	-0.0172663	-0.0820553	0.137813	-0.113268	-0.152932	0.0951783	0.40124
Streptococcus pyogenes	-0.343333	0.0257972	0.976591	0.978219	0.780334	0.958067	0.897845	0.97945	0.959391	0.972364	0.972544	0.979471	0.97757	0.977393	0.977333	0.0271104	-0.0469064	0.179542	0.71444	0.951696	0.00462487	0.905253	0.312682	0.488681	0.920838	-0.119191	-0.151242	-0.149588	-0.0879339	0.430266	-0.0776326	-0.104603	-0.000933083	-0.136642	-0.178295	0.0238886	-0.203189	0.137073	-0.0933303	-0.115878	-0.0356441	0.0870247	-0.0314326	-0.0857323	0.128868	-0.0939263	-0.15911	0.0839693	0.383145
Streptococcus equi	-0.352644	0.0248914	0.968539	0.961949	0.765747	0.952057	0.88726	0.970042	0.942422	0.966649	0.966368	0.970523	0.970474	0.96226	0.97149	0.0848255	-0.051317	0.225954	0.701127	0.935672	-0.0121334	0.887353	0.291672	0.472194	0.902767	-0.11924	-0.172782	-0.16444	-0.0973475	0.419112	-0.0923122	-0.119204	-0.0211191	-0.153237	-0.198032	0.00292038	-0.219951	0.11666	-0.113695	-0.131595	-0.0106204	0.0715202	-0.056984	-0.0817942	0.103991	-0.0810611	-0.169093	0.0572935	0.373865
Streptococcus dysgalactiae	-0.421436	-0.0251872	0.935255	0.950379	0.722681	0.91099	0.844291	0.940767	0.924209	0.92801	0.931765	0.940398	0.936287	0.945077	0.935194	-0.059213	-0.0739775	0.248781	0.686841	0.91791	-0.0304172	0.882875	0.287033	0.459013	0.886038	-0.161681	-0.179039	-0.16654	-0.100798	0.393943	-0.104345	-0.131876	0.00671453	-0.16241	-0.20148	-0.00867719	-0.224109	0.11903	-0.122232	-0.134168	-0.0458151	0.0651203	0.00678871	-0.0933353	0.135493	-0.113764	-0.201115	0.0994305	0.357238
Streptococcus infantis	-0.60079	-0.0630501	0.744846	0.738964	0.49523	0.733692	0.631077	0.749137	0.706729	0.746575	0.763087	0.750375	0.749541	0.73879	0.753144	0.0477786	-0.195861	0.13845	0.489186	0.704397	-0.16991	0.66963	0.104986	0.278407	0.663685	-0.230355	-0.282669	-0.233716	-0.122073	0.357922	-0.153783	-0.174527	-0.0963797	-0.286291	-0.312585	-0.146932	-0.251387	-0.0153317	-0.250174	-0.23377	0.289921	-0.0712357	-0.143034	0.0362899	-0.0423147	-0.165314	-0.291699	-0.0250574	0.294203
Streptococcus equinus	-0.237999	0.0718341	0.99655	0.989437	0.827163	0.983365	0.934906	0.996601	0.976621	0.994966	0.990955	0.997118	0.996578	0.989642	0.997155	0.0953984	-0.0256492	0.0501105	0.727453	0.966021	0.0482538	0.91968	0.346107	0.515464	0.93846	-0.0700051	-0.117753	-0.120178	-0.0680006	0.453098	-0.0486399	-0.0728028	0.0238591	-0.0943079	-0.138564	0.0651599	-0.174824	0.16356	-0.049044	-0.0815321	-0.0666753	0.116249	-0.00674835	-0.0840735	0.156327	-0.0766952	-0.104613	0.122372	0.388183
Streptococcus cristatus	-0.610026	-0.101871	0.327707	0.333888	0.129623	0.309172	0.230503	0.334985	0.295652	0.322932	0.347013	0.334866	0.334805	0.330899	0.336906	-0.0281703	-0.143659	0.593747	0.202938	0.300925	-0.210371	0.29449	-0.0584932	0.0419388	0.273042	-0.221506	-0.264523	-0.224546	-0.11094	0.040014	-0.172404	-0.166028	-0.0939985	-0.297472	-0.301961	-0.184788	-0.261511	-0.122139	-0.286652	-0.245672	0.372724	-0.139164	-0.152606	-0.0847081	-0.112563	-0.0791448	-0.28515	-0.138029	0.0836247
Streptococcus porcinus	-0.48841	-0.0382957	0.9053	0.923025	0.680363	0.883832	0.807143	0.911634	0.892166	0.89842	0.908305	0.911424	0.906862	0.916248	0.905942	-0.0763658	-0.132589	0.169698	0.650105	0.886358	-0.0610255	0.857468	0.252	0.423572	0.851388	-0.189112	-0.206815	-0.187111	-0.0991224	0.395117	-0.110519	-0.136203	-0.00423122	-0.194918	-0.235133	-0.0378928	-0.23358	0.093055	-0.155238	-0.158813	0.0605851	0.035245	0.00973226	-0.0686898	0.109157	-0.142739	-0.232637	0.102185	0.357371
Streptococcus acidominimus	-0.538295	-0.0951428	0.883784	0.902902	0.643607	0.864875	0.774714	0.890448	0.869451	0.878845	0.88561	0.890561	0.885807	0.895217	0.884951	-0.0921126	-0.170522	0.109831	0.622214	0.867279	-0.097072	0.836139	0.221274	0.400258	0.824117	-0.219243	-0.229906	-0.21017	-0.131863	0.454867	-0.103921	-0.165904	-0.00851194	-0.215454	-0.258953	-0.0751175	-0.231515	0.0753651	-0.183113	-0.177435	-0.0241667	0.00593191	0.0143757	0.0264801	0.0884039	-0.170222	-0.264221	0.131508	0.377573
Streptococcus rubneri	-0.342011	0.0276566	-0.0155621	-0.0101595	-0.102315	-0.0111535	-0.0588799	-0.00978237	-0.0256924	-0.01817	0.0255789	-0.00999786	-0.0129249	-0.00826488	-0.011722	-0.105168	-0.158232	-0.00561294	-0.0439889	-0.0217692	-0.138395	-0.01148	-0.115953	-0.0897746	-0.0351463	-0.15145	-0.169007	-0.0759431	0.0636323	-0.0821444	-0.0974483	-0.0273714	-0.103713	-0.17352	-0.162381	-0.137453	-0.0648472	-0.116255	-0.142095	-0.121281	0.817852	-0.104304	-0.109266	-0.0317595	-0.10011	-0.115441	-0.162262	-0.129114	-0.0263602
Streptococcus agalactiae	-0.490696	-0.189333	0.368769	0.406068	0.191671	0.33835	0.27671	0.37421	0.353585	0.363246	0.375176	0.376163	0.369475	0.377379	0.372535	-0.122913	-0.202093	0.0357445	0.217903	0.340324	-0.176413	0.406498	0.0255057	0.107079	0.320669	-0.220755	-0.24484	-0.186762	-0.13536	0.0149799	-0.171475	-0.208363	0.0760126	-0.220958	-0.232971	-0.155987	-0.230914	-0.0342623	-0.214127	-0.166919	-0.0939348	-0.0908613	0.296064	-0.117529	0.13172	-0.161862	-0.258722	0.236914	0.000940602
Streptococcus pseudoporcinus	-0.526503	-0.137969	0.537414	0.557609	0.328277	0.510557	0.435168	0.545445	0.521522	0.529801	0.540426	0.544714	0.542672	0.549329	0.541945	-0.114065	-0.0947125	0.801548	0.406699	0.524585	-0.150159	0.517069	0.0742532	0.212962	0.491712	-0.209765	-0.245632	-0.20773	-0.133998	0.157115	-0.168286	-0.204712	-0.0377	-0.224208	-0.255048	-0.143649	-0.251907	-0.0338689	-0.217334	-0.189051	0.00123844	-0.0477648	-0.0224792	-0.0762026	0.0384781	-0.043597	-0.274486	-0.00205951	0.153093
Streptococcus pluranimalium	-0.368507	-0.0158772	0.892406	0.892494	0.693498	0.870428	0.809217	0.89396	0.868288	0.890472	0.88737	0.894986	0.893723	0.887822	0.895415	0.0812447	-0.0999952	0.0419234	0.626881	0.858249	-0.0353455	0.820977	0.264475	0.42464	0.83304	-0.135526	-0.159694	-0.163051	-0.112461	0.357778	-0.106643	-0.127745	-0.0333331	-0.159697	-0.196068	-0.0106891	-0.227676	0.119976	-0.127624	-0.1329	-0.0764249	0.0531975	-0.0173276	-0.105754	0.0805911	-0.118429	-0.17674	0.0493262	0.346048
Streptococcus milleri	-0.42009	-0.171753	0.227135	0.246009	0.0790312	0.199947	0.147734	0.23199	0.213473	0.223781	0.22511	0.232918	0.23007	0.234469	0.231942	-0.0356852	-0.177337	0.0682528	0.12001	0.210585	-0.166657	0.211501	-0.0192605	0.0395114	0.202453	-0.188876	-0.15128	-0.153089	-0.129873	-0.00270022	-0.154058	-0.157464	-0.10769	-0.191425	-0.193827	-0.141681	-0.200222	-0.0217781	-0.197638	-0.15434	-0.0638106	-0.0845454	-0.0177972	-0.0872537	-0.0857333	-0.128515	-0.218408	-0.0937337	0.0856598
Streptococcus gwangjuense	-0.67943	-0.247527	0.0245497	0.0391473	-0.162354	0.0284852	-0.082112	0.0341247	0.00462382	0.0275062	0.0463764	0.0342935	0.0319255	0.0376428	0.0327797	-0.149505	-0.292614	0.180106	-0.0520946	0.0218952	-0.298736	0.00896403	-0.220405	-0.136404	-0.0230565	-0.277869	-0.26965	-0.240204	-0.155351	0.226072	-0.0869303	-0.176527	-0.120148	-0.313026	-0.321786	-0.282196	-0.159134	-0.193796	-0.326711	-0.259855	0.230113	-0.238225	-0.183724	0.327337	-0.241637	-0.177769	-0.335018	-0.0768787	0.125967
Streptococcus canis	-0.400466	-0.00282508	0.933573	0.931496	0.720456	0.914959	0.844784	0.936483	0.90848	0.930705	0.932558	0.936725	0.936422	0.93049	0.936997	0.0491754	-0.0633172	0.357862	0.681008	0.904059	-0.0396395	0.860198	0.265165	0.447554	0.868444	-0.141207	-0.193648	-0.179166	-0.107626	0.399463	-0.104624	-0.13966	-0.0215275	-0.170768	-0.215991	-0.025051	-0.230812	0.0934724	-0.136885	-0.146509	-0.00953512	0.052757	-0.0535715	-0.0735166	0.0992107	-0.0765318	-0.194993	0.0544167	0.351687
Streptococcus pseudopneumoniae	-0.713377	-0.257629	0.0672313	0.0847576	-0.1339	0.0591992	-0.041108	0.0780455	0.0435941	0.0625963	0.085483	0.0769434	0.076884	0.0830942	0.0753819	-0.157706	-0.230989	0.556568	-0.00165461	0.0721928	-0.306329	0.050549	-0.191151	-0.121254	0.0251313	-0.287679	-0.263509	-0.255733	-0.153414	0.12453	-0.119462	-0.201325	-0.128797	-0.311231	-0.310005	-0.270404	-0.183708	-0.191549	-0.323314	-0.268884	0.285028	-0.218024	-0.183264	0.168915	-0.205305	-0.0965059	-0.324668	-0.112017	0.111382
Streptococcus uberis	-0.328391	0.0222479	0.977156	0.988207	0.790511	0.959632	0.902631	0.981053	0.969279	0.970997	0.971907	0.980681	0.976737	0.985052	0.975118	-0.0357702	-0.0618292	0.0611116	0.717531	0.96125	0.0252955	0.919666	0.331493	0.499913	0.930575	-0.119141	-0.134973	-0.135901	-0.075778	0.459885	-0.0563466	-0.0859909	0.0289626	-0.117178	-0.161748	0.0448749	-0.184579	0.156161	-0.072294	-0.0982305	-0.0607785	0.100886	0.019598	-0.0671098	0.158939	-0.114652	-0.150209	0.13998	0.402333
Streptococcus halotolerans	-0.315308	0.0299565	0.982881	0.991775	0.799416	0.967687	0.910515	0.986764	0.975916	0.977375	0.977277	0.986295	0.982854	0.990687	0.980751	-0.0310515	-0.0577908	0.0509622	0.724022	0.970602	0.0299991	0.920296	0.337814	0.50747	0.937485	-0.112529	-0.125276	-0.130057	-0.0723001	0.491973	-0.0384808	-0.0765232	0.0254777	-0.106983	-0.153226	0.0502966	-0.170266	0.162776	-0.0637495	-0.0908918	-0.0608054	0.10601	-0.00373211	-0.0389032	0.150695	-0.112581	-0.140675	0.132459	0.424779
Streptococcus ratti	-0.303019	0.0394888	0.985632	0.980577	0.797902	0.968814	0.912649	0.986483	0.963443	0.983575	0.980478	0.987127	0.986241	0.979953	0.987126	0.0864216	-0.047164	0.0610383	0.709973	0.954062	0.0155886	0.906849	0.321643	0.493242	0.924945	-0.100453	-0.140985	-0.14114	-0.088838	0.431736	-0.0718271	-0.097895	0.00153577	-0.126359	-0.167124	0.0354099	-0.19918	0.147695	-0.082786	-0.107463	-0.0599645	0.0916671	-0.0249865	-0.0892575	0.128784	-0.0961443	-0.138703	0.0910053	0.383624
Streptococcus respiraculi	-0.43759	-0.032134	0.921185	0.936083	0.707561	0.898492	0.828834	0.926545	0.909665	0.91467	0.918796	0.92648	0.922	0.930917	0.9211	-0.0534498	-0.103259	0.0748852	0.660481	0.902774	-0.0392064	0.865636	0.272535	0.443069	0.870601	-0.171977	-0.170542	-0.169497	-0.10378	0.406985	-0.0908602	-0.126325	-0.0133034	-0.171241	-0.207506	-0.0133953	-0.212595	0.120127	-0.130085	-0.140004	-0.0234929	0.0540443	-0.000405426	-0.0716068	0.107979	-0.148985	-0.206054	0.0895181	0.376353
Streptococcus uri1lis	-0.430934	-0.0652672	0.849795	0.868417	0.644274	0.822836	0.758606	0.854498	0.837673	0.84313	0.84403	0.854886	0.84997	0.858638	0.849959	-0.0444606	-0.130816	0.0288599	0.599149	0.827235	-0.0491165	0.804804	0.247366	0.400506	0.801841	-0.173764	-0.164984	-0.169565	-0.11937	0.331246	-0.110051	-0.141716	-0.0113855	-0.17474	-0.204553	-0.0227592	-0.226195	0.113481	-0.138009	-0.141087	-0.105025	0.0415265	0.0482396	-0.109295	0.104325	-0.152062	-0.207253	0.095915	0.328978
Streptococcus parauberis	-0.395918	-0.0114077	0.937005	0.949667	0.732571	0.915097	0.850774	0.941832	0.926664	0.930309	0.933501	0.941627	0.937316	0.946194	0.936295	-0.0446066	-0.0621667	0.0631355	0.677339	0.919571	-0.0171133	0.878062	0.291591	0.460827	0.88911	-0.155493	-0.156158	-0.156064	-0.0919182	0.410268	-0.0855429	-0.112449	-0.0135334	-0.152762	-0.189687	0.00667129	-0.202605	0.134076	-0.108254	-0.125192	-0.0215973	0.0724594	-0.00881622	-0.0851	0.11801	-0.138435	-0.185836	0.0833527	0.384558
Streptococcus iniae	-0.345116	0.0158892	0.965455	0.976667	0.775983	0.946459	0.888662	0.969605	0.957128	0.95928	0.960508	0.969285	0.965477	0.973708	0.963885	-0.0325228	-0.0629239	0.0613859	0.706372	0.949138	0.0171289	0.906072	0.322472	0.489866	0.919565	-0.126922	-0.136348	-0.140043	-0.0786381	0.444071	-0.0644619	-0.0889585	0.0128444	-0.124869	-0.168136	0.0368891	-0.192346	0.153348	-0.0818873	-0.104322	-0.0474327	0.0945038	0.00152679	-0.0772492	0.140734	-0.122409	-0.157729	0.111293	0.400182
Streptococcus gallolyticus	-0.230175	0.0787941	0.98966	0.969333	0.816105	0.97768	0.927146	0.987161	0.956083	0.991905	0.985594	0.988636	0.990775	0.97074	0.993661	0.197331	-0.0176614	0.0516008	0.707053	0.944669	0.0290443	0.897489	0.323504	0.496468	0.916771	-0.0604871	-0.135914	-0.133595	-0.0826844	0.425815	-0.0650994	-0.0894549	0.00249248	-0.109701	-0.154658	0.0448177	-0.192068	0.143969	-0.0696361	-0.0963253	-0.0557173	0.0975946	-0.032362	-0.093893	0.129815	-0.0630751	-0.105525	0.0907333	0.363419
Streptococcus himalayensis	-0.301893	0.0406351	0.983158	0.992509	0.803621	0.966274	0.913189	0.986844	0.976419	0.977223	0.977737	0.986391	0.982653	0.990638	0.980939	-0.0271642	-0.0516016	0.0563918	0.72616	0.967926	0.0377777	0.922856	0.343911	0.510386	0.939315	-0.106324	-0.120599	-0.124219	-0.0650685	0.46378	-0.0494477	-0.0725954	0.0275665	-0.103475	-0.14726	0.0585275	-0.1746	0.166585	-0.0573688	-0.0866854	-0.04989	0.112601	0.00674089	-0.0724181	0.159991	-0.107827	-0.134035	0.129968	0.407472
Streptococcus sobrinus	-0.597058	-0.29451	0.270607	0.287251	0.0550432	0.222376	0.15149	0.277871	0.249861	0.261711	0.262176	0.279619	0.273467	0.282913	0.277089	-0.1129	0.0840098	-0.0230686	0.120614	0.265032	-0.268695	0.235512	-0.0481523	0.0270202	0.233769	-0.298746	-0.19742	-0.159259	-0.22465	-0.0791312	-0.209555	-0.273588	-0.106767	-0.297862	-0.192446	-0.209	-0.179742	-0.0421656	-0.217435	-0.214286	-0.154916	-0.144079	-0.1066	-0.0955651	-0.0412201	-0.219471	-0.278049	-0.123169	0.00582137
Streptococcus marmotae	-0.320602	0.0224533	0.981392	0.98987	0.795963	0.961998	0.907428	0.985132	0.973527	0.974346	0.973952	0.984755	0.980612	0.98917	0.979026	-0.0358048	-0.0380669	0.0528131	0.720108	0.969364	0.0298404	0.918219	0.342985	0.502854	0.936734	-0.116667	-0.133327	-0.12008	-0.0809779	0.446948	-0.0592015	-0.089535	0.0429004	-0.116505	-0.145756	0.0518117	-0.18019	0.16357	-0.0599391	-0.0963579	-0.0754146	0.101311	-0.00866465	-0.0743734	0.166917	-0.114899	-0.139374	0.1305	0.392187
Streptococcus chenjunshii	-0.337508	0.00621493	0.950621	0.961467	0.762356	0.929635	0.873847	0.95456	0.942329	0.944431	0.943047	0.954283	0.950436	0.958463	0.949136	-0.0252215	-0.067621	0.0654394	0.695138	0.934563	0.0134522	0.889462	0.321336	0.482978	0.90722	-0.125619	-0.130051	-0.135272	-0.0861231	0.427892	-0.0714919	-0.0943202	0.0079411	-0.122971	-0.160978	0.0367145	-0.194621	0.156677	-0.0799842	-0.102564	-0.0896203	0.0942537	-0.00510807	-0.0846961	0.133889	-0.117694	-0.154016	0.0981615	0.393536
Streptococcus ferus	-0.462875	-0.0559044	0.90248	0.916992	0.681436	0.881067	0.805157	0.908091	0.890283	0.896877	0.899916	0.908063	0.903626	0.912546	0.902787	-0.0588036	-0.118859	0.0616115	0.642035	0.886918	-0.0580438	0.844041	0.258581	0.426759	0.851434	-0.186109	-0.187352	-0.176461	-0.115302	0.429046	-0.0993428	-0.137239	-0.0186669	-0.182414	-0.218183	-0.0324681	-0.219773	0.110691	-0.143843	-0.150044	-0.038639	0.038466	-0.0231686	-0.0290224	0.0882846	-0.157023	-0.221092	0.0827824	0.385086
Streptococcus merionis	-0.332635	0.0237626	0.979338	0.986298	0.791741	0.96637	0.904467	0.983476	0.971833	0.974123	0.974218	0.982874	0.979581	0.987533	0.977247	-0.0368705	-0.0578225	0.0575498	0.719869	0.969537	0.0237353	0.911486	0.32828	0.50089	0.93243	-0.119179	-0.131543	-0.133999	-0.0778651	0.518894	-0.0323366	-0.0786508	0.019254	-0.115585	-0.16015	0.0430367	-0.16586	0.154147	-0.0703027	-0.0994543	-0.0496451	0.0966939	-0.0373383	-0.0026224	0.133861	-0.117216	-0.147969	0.120754	0.438668
Streptococcus parasuis	-0.246497	0.0701331	0.997207	0.990557	0.825521	0.983799	0.934188	0.997491	0.977471	0.995384	0.991839	0.997938	0.997284	0.991023	0.99773	0.0899879	-0.027873	0.0540124	0.727183	0.967308	0.045999	0.919476	0.343535	0.513292	0.93925	-0.0737913	-0.120529	-0.123347	-0.0695692	0.453961	-0.0500365	-0.0736112	0.0195968	-0.0980698	-0.143216	0.0625873	-0.177966	0.161203	-0.0534241	-0.0850247	-0.0581192	0.113335	-0.0141772	-0.0830427	0.150919	-0.0791635	-0.109621	0.114945	0.39159
Streptococcus halichoeri	-0.361973	0.00202057	0.953051	0.967767	0.75788	0.931722	0.872753	0.95732	0.944144	0.946653	0.948359	0.957252	0.952738	0.961386	0.951747	-0.0413387	-0.0871596	0.0548191	0.693346	0.933154	0.00193756	0.90226	0.314262	0.478017	0.90538	-0.137307	-0.14869	-0.148207	-0.0840586	0.416026	-0.0813904	-0.100099	0.022743	-0.139038	-0.176327	0.0230028	-0.204733	0.14426	-0.0935751	-0.11114	-0.0632996	0.085464	0.0433729	-0.0957844	0.153069	-0.125797	-0.169078	0.140723	0.372762
Streptococcus pasteurianus	-0.389084	-0.00977604	0.951961	0.965481	0.750836	0.936523	0.86805	0.956576	0.94228	0.946617	0.95026	0.956381	0.95177	0.960807	0.950609	-0.0605959	-0.0926634	0.0470726	0.689764	0.934649	-0.00726035	0.900356	0.297778	0.471186	0.899474	-0.147655	-0.168092	-0.158381	-0.089403	0.477567	-0.0657881	-0.107193	0.032137	-0.147144	-0.191866	0.0109822	-0.19193	0.127562	-0.102349	-0.122109	-0.0434217	0.0710148	0.0320828	-0.0173811	0.149167	-0.136377	-0.183068	0.166497	0.392541
Lactococcus raffinolactis	-0.529834	-0.153819	0.184772	0.203446	0.0128968	0.16442	0.0933772	0.191715	0.169608	0.180552	0.202229	0.192573	0.188686	0.19485	0.19055	-0.0859819	-0.213979	-0.0144809	0.0701759	0.166715	-0.208111	0.172121	-0.0839767	-0.0166124	0.149761	-0.241056	-0.214335	-0.154858	-0.097086	-0.0194431	-0.16859	-0.159462	-0.152125	-0.248414	-0.249253	-0.189558	-0.189495	-0.0838759	-0.243115	-0.171936	0.317748	-0.121947	-0.0770393	-0.0189346	-0.138772	-0.179604	-0.267625	-0.140216	0.0735299
Leuconostoc mesenteroides	-0.45318	-0.0575564	0.0113018	0.0239738	-0.112972	0.00405254	-0.0546468	0.017905	-0.00275924	0.00797648	0.0454322	0.0183173	0.0149707	0.0200238	0.0167276	-0.0985185	-0.229268	-0.0343876	-0.0449641	0.0012703	-0.192978	0.0124412	-0.128944	-0.0992613	-0.0123345	-0.204075	-0.199727	-0.118886	0.00142912	-0.110978	-0.145021	-0.0851603	-0.13318	-0.222733	-0.209513	-0.182299	-0.132158	-0.114385	-0.202292	-0.162748	0.671606	-0.135287	-0.0960116	-0.064777	-0.135244	-0.154373	-0.222044	-0.158592	-0.0117957
Leuconostoc citreum	-0.320274	0.0324685	-0.0292737	-0.0237659	-0.109514	-0.0245853	-0.0689596	-0.0238241	-0.0388093	-0.0318168	0.011575	-0.0240101	-0.0265643	-0.0223988	-0.0255736	-0.0974772	-0.162495	-0.0305876	-0.0537072	-0.0348042	-0.132407	-0.0239309	-0.113869	-0.0932879	-0.0465528	-0.143676	-0.16047	-0.0702762	0.0708195	-0.0959127	-0.0964583	-0.0202998	-0.108793	-0.161984	-0.153949	-0.132902	-0.0616053	-0.110235	-0.133919	-0.112346	0.821933	-0.0979779	-0.100469	-0.0443376	-0.100571	-0.110023	-0.153822	-0.133538	-0.0271797
Ligilactobacillus ruminis	-0.253469	0.067468	0.99688	0.988018	0.821556	0.983433	0.932035	0.996896	0.974648	0.995733	0.99193	0.997521	0.997301	0.988865	0.998138	0.104677	-0.0237702	0.0523617	0.723418	0.965339	0.0370717	0.916005	0.338146	0.509226	0.936042	-0.0758382	-0.127904	-0.127047	-0.0747157	0.452835	-0.0538991	-0.0797554	0.0165078	-0.103439	-0.14796	0.0548989	-0.18122	0.156759	-0.0598084	-0.0897807	-0.0550273	0.106982	-0.0224286	-0.0789734	0.145507	-0.0791816	-0.113494	0.10905	0.388029
Ligilactobacillus murinus	-0.594672	-0.232906	0.0850264	0.0963989	-0.0905359	0.0980253	-0.0115121	0.0935319	0.0685338	0.0852208	0.104327	0.093744	0.0957893	0.0979011	0.0902268	-0.153097	-0.275004	0.0340968	-0.00465831	0.126952	-0.273261	0.06614	-0.167315	-0.0840237	0.0351793	-0.271375	-0.264013	-0.209352	-0.137899	0.313769	0.0640211	-0.164746	-0.0851515	-0.238729	-0.283829	-0.278167	-0.0797609	-0.142942	-0.277576	-0.201744	0.258496	-0.199459	-0.111665	0.388715	-0.177397	-0.187319	-0.300303	-0.00410904	0.263061
Ligilactobacillus agilis	-0.576418	-0.239992	0.293742	0.30244	0.100933	0.305009	0.191286	0.301555	0.278596	0.296303	0.29992	0.30161	0.302567	0.305942	0.297989	-0.129566	-0.23507	0.042949	0.157956	0.323628	-0.230473	0.252264	-0.0763186	0.0453763	0.239013	-0.247732	-0.23685	-0.222348	-0.181957	0.497021	0.058961	-0.170539	-0.0655449	-0.226249	-0.275463	-0.22636	-0.0967023	-0.0877582	-0.255549	-0.200591	-0.033576	-0.157865	-0.141884	0.45444	-0.149962	-0.179411	-0.289866	0.0448394	0.354412
Lactobacillus johnsonii	-0.430362	-0.050248	0.887816	0.90925	0.667778	0.86276	0.791185	0.893527	0.874193	0.87942	0.883042	0.893742	0.887726	0.898941	0.888	-0.0875485	-0.0303063	0.0415909	0.626698	0.867604	-0.0592051	0.850298	0.252796	0.414935	0.831635	-0.14294	-0.20931	-0.190843	-0.131291	0.343909	-0.115521	-0.150533	0.0448165	-0.188272	-0.213032	-0.0265731	-0.227925	0.100069	-0.13547	-0.151326	-0.0678018	0.033862	0.0896251	-0.115074	0.159529	-0.0831692	-0.227114	0.180139	0.304891
Lactobacillus sp. 3B(2020)	-0.305452	-0.212126	0.00856527	0.0149744	-0.117942	-0.0232843	-0.0645129	0.0137589	-0.0052006	0.00348901	0.00480849	0.0144283	0.0103236	0.0197524	0.0145011	-0.127094	0.729858	-0.0305189	-0.0403971	0.013209	-0.206613	-0.00704668	-0.126256	-0.0613232	-0.0125837	-0.202428	-0.161287	-0.112035	-0.135955	-0.124081	-0.184046	-0.178714	-0.113502	-0.183283	-0.111655	-0.175082	-0.0753175	-0.097765	-0.122248	-0.121284	-0.0871665	-0.10869	-0.0964325	-0.0329815	0.00309596	-0.127855	-0.186933	-0.132689	-0.0990024
Lactobacillus amylovorus	-0.666591	-0.169411	0.750834	0.772191	0.47967	0.71761	0.618718	0.759424	0.730589	0.741863	0.755112	0.760134	0.754066	0.765503	0.754513	-0.12895	-0.0537262	0.0245375	0.49194	0.738834	-0.195195	0.704514	0.123641	0.286838	0.688975	-0.298691	-0.279788	-0.231429	-0.173846	0.266554	-0.156621	-0.231823	-0.0626556	-0.290143	-0.29491	-0.159015	-0.245902	0.0224695	-0.24537	-0.230989	0.067737	-0.0684081	-0.0320641	-0.0543257	0.0377673	-0.234763	-0.326351	0.0247968	0.277586
Lactobacillus acidophilus	-0.494952	-0.069234	0.787946	0.80573	0.53721	0.775151	0.67571	0.795598	0.770787	0.781807	0.785493	0.795234	0.789907	0.801608	0.790438	-0.102817	-0.0724887	0.0150383	0.541604	0.774669	-0.138481	0.729377	0.16484	0.33587	0.72985	-0.0865334	-0.241931	-0.230969	-0.167208	0.391665	-0.116043	-0.164144	-0.0396032	-0.232515	-0.250555	-0.0765629	-0.211106	0.0580265	-0.172199	-0.187469	0.0766118	-0.0154422	-0.046355	-0.010655	0.021711	0.0539057	-0.291972	0.0722125	0.358073
Lacticaseibacillus paracasei	-0.791765	-0.433451	0.0204289	0.0439831	-0.223586	-0.0282298	-0.119248	0.0319196	-0.00982587	0.00576504	0.0205689	0.0321411	0.0272377	0.0397986	0.0299459	-0.225001	0.221015	0.487702	-0.0703245	0.0189152	-0.40598	0.0144038	-0.225799	-0.176829	-0.0242015	-0.375337	-0.281283	-0.258835	-0.273213	-0.181575	-0.237046	-0.37147	-0.107429	-0.371267	-0.258557	-0.322599	-0.161024	-0.199468	-0.317573	-0.303208	-0.051732	-0.261024	-0.103719	-0.0539253	-0.0797699	-0.137419	-0.338553	-0.0857955	-0.123438
Limosilactobacillus mucosae	-0.218702	0.0831094	0.999302	0.99291	0.836503	0.986979	0.941286	0.999822	0.983414	0.997172	0.992855	0.999976	0.999205	0.994937	0.998986	0.0791275	-0.0125091	0.0516643	0.736579	0.973984	0.0615161	0.920928	0.357936	0.525889	0.946932	-0.0619689	-0.100665	-0.108374	-0.0582779	0.472629	-0.0353003	-0.0577028	0.0222341	-0.0790274	-0.123419	0.0795305	-0.159616	0.174742	-0.0332113	-0.0696273	-0.0637336	0.128051	-0.0264815	-0.0729882	0.155153	-0.0729978	-0.0919883	0.112128	0.404873
Limosilactobacillus gastricus	-0.277442	-0.205972	-0.0320056	-0.0294752	-0.143472	-0.0627883	-0.100964	-0.0273425	-0.0450573	-0.038528	-0.0367856	-0.0268746	-0.0308887	-0.0215727	-0.0269689	-0.122293	0.743815	-0.0339722	-0.071101	-0.0315472	-0.193638	-0.0478737	-0.150084	-0.0884764	-0.0537768	-0.187957	-0.144498	-0.112713	-0.143601	-0.146592	-0.149556	-0.185784	-0.128728	-0.163368	-0.107702	-0.167982	-0.0393262	-0.103304	-0.12719	-0.124922	-0.0963257	-0.116234	-0.116828	-0.0488265	-0.0289759	-0.120246	-0.171304	-0.155473	-0.112889
Weissella confusa	-0.458063	-0.0308484	0.0880542	0.0950633	-0.0449666	0.0974635	0.0217143	0.0954096	0.0751927	0.0860008	0.128658	0.0951272	0.0934456	0.098129	0.0922433	-0.133408	-0.218494	-0.00509508	0.0217589	0.0969945	-0.185428	0.0796696	-0.112602	-0.0540395	0.0550794	-0.205425	-0.223447	-0.127371	0.0202954	0.0809651	-0.05761	-0.0667893	-0.113788	-0.20763	-0.220484	-0.187289	-0.0768461	-0.120935	-0.191051	-0.155915	0.78052	-0.127732	-0.127744	0.101265	-0.121345	-0.150446	-0.224671	-0.0959576	0.101489
Levilactobacillus brevis	-0.529929	-0.24686	0.208412	0.22691	0.0193461	0.17209	0.103174	0.214947	0.189989	0.202543	0.206996	0.21612	0.2115	0.219586	0.214661	-0.0897636	0.0917826	-0.00941631	0.083631	0.194767	-0.241251	0.186924	-0.0802562	-0.000928948	0.174059	-0.263434	-0.211644	-0.189071	-0.179276	-0.0444677	-0.1964	-0.227417	-0.146646	-0.253792	-0.232562	-0.207505	-0.198375	-0.0632538	-0.244504	-0.201644	-0.0551003	-0.135337	-0.0655486	-0.0828869	-0.0956668	-0.18703	-0.281536	-0.14046	0.0448615
Latilactobacillus curvatus	-0.616971	-0.19158	0.429834	0.439783	0.191885	0.409353	0.306561	0.439052	0.409891	0.423697	0.441865	0.439034	0.434244	0.446526	0.435355	-0.171905	0.385994	0.00717262	0.254154	0.43267	-0.243536	0.384757	-0.0451747	0.107321	0.374055	-0.303221	-0.308464	-0.231075	-0.159653	0.221734	-0.147901	-0.216263	-0.13188	-0.286091	-0.295947	-0.223809	-0.171902	-0.0849759	-0.260537	-0.232753	0.20461	-0.133593	-0.17511	0.0881897	-0.0613933	-0.224408	-0.33283	-0.101008	0.190671
Furfurilactobacillus rossiae	-0.326652	0.0347386	-0.0020173	0.00333701	-0.0865674	0.00363832	-0.0432041	0.00351157	-0.0114603	-0.00441929	0.0392278	0.00327687	0.000697573	0.00494512	0.00149799	-0.100287	-0.171653	-0.0218632	-0.0320069	-0.00630653	-0.131069	0.00182262	-0.104018	-0.0778637	-0.0207513	-0.146846	-0.166009	-0.0721886	0.0713209	-0.0681167	-0.0911753	-0.0211431	-0.104073	-0.162506	-0.157782	-0.132311	-0.0621957	-0.106977	-0.134656	-0.112648	0.824513	-0.0947238	-0.0997502	-0.0294184	-0.094675	-0.112977	-0.156784	-0.122676	-0.00976168
Enterococcus thailandicus	-0.446715	-0.142682	0.506834	0.541073	0.331727	0.478061	0.420648	0.511612	0.493432	0.500865	0.510414	0.513281	0.506811	0.514844	0.509094	-0.103175	-0.184082	0.00344456	0.328559	0.478831	-0.125719	0.531652	0.100601	0.197455	0.458632	-0.192935	-0.221049	-0.172626	-0.121738	0.0976699	-0.145215	-0.181409	0.0908639	-0.192661	-0.214145	-0.104895	-0.224855	0.0128319	-0.17915	-0.146203	-0.109534	-0.045235	0.286151	-0.126308	0.163998	-0.154617	-0.229703	0.254347	0.0747972
Enterococcus saigonensis	-0.346147	0.00809008	0.95802	0.972651	0.770628	0.939323	0.882872	0.962188	0.94962	0.952188	0.953433	0.962123	0.957725	0.966212	0.956448	-0.0421866	-0.0798793	0.0441663	0.697749	0.939956	0.0130717	0.910609	0.322187	0.484696	0.9101	-0.126731	-0.143863	-0.142452	-0.0806656	0.432956	-0.060668	-0.0956571	0.0469666	-0.123984	-0.171109	0.0358411	-0.19409	0.149785	-0.0839423	-0.101406	-0.0746268	0.0911777	0.0635877	-0.0783718	0.174081	-0.12473	-0.156606	0.169574	0.37983
Enterococcus wangshanyuanii	-0.294416	0.0372499	0.984686	0.993681	0.807135	0.968648	0.915655	0.988297	0.978229	0.97864	0.978045	0.987868	0.984324	0.992157	0.98222	-0.031023	-0.0428523	0.0494929	0.727285	0.972889	0.0395492	0.924893	0.346968	0.512687	0.940007	-0.102077	-0.119002	-0.121194	-0.070392	0.478312	-0.0329369	-0.0740342	0.0443301	-0.0975971	-0.140693	0.0606457	-0.163836	0.168417	-0.0515715	-0.0828148	-0.0782317	0.11229	0.0152183	-0.0544422	0.171638	-0.10514	-0.128292	0.151668	0.410973
Enterococcus galli1rum	-0.323552	-0.186605	-0.0279705	0.00693015	-0.117879	-0.0510586	-0.0834409	-0.0247354	-0.0389959	-0.0313169	-0.019413	-0.0224607	-0.0278061	-0.0233729	-0.0240411	-0.108393	-0.179759	-0.026836	-0.0723053	-0.0515203	-0.169319	0.0432	-0.0961338	-0.0892395	-0.0568762	-0.157124	-0.184353	-0.120971	-0.0945851	-0.18691	-0.140664	-0.164201	0.0982972	-0.157525	-0.153609	-0.159491	-0.150367	-0.0907605	-0.168924	-0.111947	-0.0845416	-0.121355	0.348715	-0.110794	0.105684	-0.110044	-0.180932	0.23293	-0.182539
Enterococcus raffinosus	-0.241774	0.0704247	0.996861	0.991028	0.82686	0.983344	0.934663	0.997268	0.978289	0.99504	0.991244	0.9977	0.996942	0.991191	0.997273	0.0853185	-0.0269106	0.0509565	0.728901	0.968009	0.0469148	0.921037	0.347532	0.516868	0.940245	-0.0720127	-0.116632	-0.119487	-0.06735	0.458587	-0.0465838	-0.0717509	0.0255618	-0.0928168	-0.137475	0.0651787	-0.172673	0.165198	-0.0487139	-0.0803715	-0.0677495	0.116435	-0.00712477	-0.0793519	0.157334	-0.0789519	-0.105603	0.123735	0.390896
Enterococcus gilvus	-0.23673	0.0740947	0.997716	0.992107	0.829612	0.984424	0.936641	0.998202	0.980021	0.995703	0.992015	0.998545	0.997702	0.992621	0.997865	0.0815042	-0.0238261	0.0500666	0.731199	0.969958	0.0512616	0.921821	0.35085	0.519357	0.942508	-0.0699146	-0.112749	-0.116051	-0.0638686	0.460415	-0.0444469	-0.0676026	0.0254593	-0.0894848	-0.133876	0.0692501	-0.169621	0.167793	-0.0443281	-0.0775795	-0.0634118	0.119914	-0.0102066	-0.0797533	0.158272	-0.0780215	-0.102179	0.121757	0.394245
Enterococcus rotai	-0.311367	0.0284551	0.977594	0.988768	0.796457	0.960522	0.905999	0.981321	0.970578	0.971824	0.971899	0.981	0.976954	0.985162	0.975441	-0.0344842	-0.0524899	0.0489343	0.719372	0.961108	0.0326006	0.922619	0.337906	0.504973	0.931534	-0.10873	-0.128663	-0.130113	-0.0734929	0.466178	-0.049394	-0.0806636	0.0444813	-0.108438	-0.152493	0.0535299	-0.177487	0.1604	-0.063644	-0.0904202	-0.0815698	0.105449	0.0335522	-0.062674	0.171727	-0.110755	-0.139968	0.159407	0.396047
Enterococcus durans	-0.451571	-0.115348	0.67381	0.704887	0.480334	0.644097	0.582967	0.678745	0.660855	0.667277	0.674186	0.680055	0.673764	0.682408	0.67524	-0.0906218	-0.163796	0.019531	0.459005	0.646969	-0.0986682	0.678101	0.172802	0.295175	0.623013	-0.190028	-0.214248	-0.175806	-0.123263	0.195704	-0.137593	-0.174455	0.0804752	-0.187026	-0.214897	-0.0742851	-0.234848	0.0558425	-0.165343	-0.144263	-0.125429	-0.00952337	0.237754	-0.127519	0.176002	-0.156812	-0.226921	0.23951	0.165583
Enterococcus casseliflavus	-0.375309	-0.185696	0.1155	0.151914	-0.00428929	0.0895928	0.0477355	0.119399	0.103389	0.111367	0.122827	0.121623	0.115638	0.121481	0.119212	-0.11332	-0.189055	-0.0198728	0.0326078	0.0895555	-0.169124	0.176295	-0.0502527	-0.016897	0.0800158	-0.175598	-0.202921	-0.143619	-0.108901	-0.119467	-0.151485	-0.177191	0.093444	-0.179202	-0.178875	-0.156842	-0.178968	-0.0676469	-0.181831	-0.128937	-0.0972669	-0.108051	0.34301	-0.121109	0.120935	-0.125237	-0.20649	0.243321	-0.119843
Enterococcus hirae	-0.434745	-0.0713492	0.833042	0.858306	0.628599	0.805253	0.741845	0.837948	0.821266	0.82641	0.830217	0.838729	0.833033	0.841966	0.833437	-0.0698074	-0.139153	0.0313659	0.586436	0.808134	-0.0599935	0.811497	0.24433	0.392001	0.78127	-0.176397	-0.193177	-0.174016	-0.115989	0.308143	-0.116672	-0.149872	0.0548204	-0.174689	-0.209417	-0.0353852	-0.234471	0.0997508	-0.143569	-0.137321	-0.122051	0.0318902	0.158317	-0.116323	0.168484	-0.153043	-0.213138	0.202139	0.272298
Tetragenococcus halophilus	-0.376062	0.00855903	0.944219	0.960323	0.748206	0.923534	0.863445	0.948806	0.934954	0.937585	0.943591	0.948782	0.943964	0.952822	0.943119	-0.0529812	-0.0926969	0.0517181	0.6858	0.924533	-0.00430783	0.899864	0.307068	0.470802	0.895347	-0.141575	-0.162686	-0.147362	-0.0751004	0.403171	-0.0813021	-0.102038	0.0387673	-0.140914	-0.182263	0.0183419	-0.202651	0.136594	-0.0970327	-0.112708	-0.00249567	0.0794525	0.0653457	-0.0986342	0.168176	-0.132125	-0.174098	0.158139	0.356208
Carnobacterium maltaromaticum	-0.510834	-0.207433	0.267774	0.273918	0.0976162	0.282258	0.178622	0.274887	0.254561	0.269022	0.27404	0.274807	0.27736	0.279284	0.270925	-0.118595	-0.215473	0.00701167	0.143409	0.310483	-0.204305	0.227181	-0.0645141	0.0425905	0.217758	-0.224657	-0.213195	-0.195162	-0.156656	0.475895	0.109553	-0.142963	-0.0546208	-0.189518	-0.244912	-0.206345	-0.0638029	-0.0728315	-0.224656	-0.170476	0.0220305	-0.13907	-0.130518	0.435866	-0.136181	-0.167116	-0.253465	0.0434137	0.370597
Bacillus anthracis	-0.519808	-0.10182	0.860792	0.87899	0.626303	0.832697	0.753051	0.867087	0.846323	0.853707	0.857153	0.867507	0.862581	0.871928	0.862072	-0.0733849	-0.11337	0.0406285	0.597891	0.844811	-0.098651	0.808506	0.221253	0.388336	0.806159	-0.217821	-0.197815	-0.193126	-0.145209	0.364651	-0.105188	-0.173942	-0.0282729	-0.210867	-0.233445	-0.0657677	-0.221223	0.0930104	-0.171622	-0.170687	-0.0743918	0.00953066	0.00290558	-0.0556073	0.0824068	-0.182397	-0.246774	0.0784068	0.347147
Bacillus velezensis	-0.672481	-0.227945	0.695547	0.71895	0.429876	0.659198	0.565355	0.704142	0.67475	0.688506	0.691022	0.704999	0.699646	0.709869	0.7003	-0.115188	-0.101012	0.189834	0.45618	0.681784	-0.206014	0.649966	0.10712	0.261777	0.636952	-0.295995	-0.243404	-0.235413	-0.208396	0.247666	-0.167459	-0.251435	-0.0657942	-0.298946	-0.282031	-0.158714	-0.257502	0.0143906	-0.244998	-0.228749	-0.132032	-0.0733622	-0.0338598	-0.0273525	0.0311261	-0.205015	-0.319058	0.0200134	0.258014
Bacillus amyloliquefaciens	-0.778252	-0.364935	0.276957	0.298109	0.0218241	0.265236	0.135238	0.286691	0.25411	0.276462	0.282966	0.287922	0.284787	0.291561	0.283998	-0.175114	-0.307726	0.0572833	0.114041	0.28626	-0.339592	0.250101	-0.132652	-0.0102827	0.21186	-0.351656	-0.309579	-0.273469	-0.256157	0.328814	-0.0762699	-0.28963	-0.0815305	-0.336211	-0.337792	-0.313712	-0.174792	-0.128311	-0.340942	-0.279724	-0.10845	-0.229203	-0.0818889	0.343598	-0.140368	-0.246503	-0.388246	0.0453425	0.219653
Bacillus atrophaeus	-0.488405	-0.0525361	0.895148	0.908682	0.667438	0.875293	0.794346	0.901569	0.882472	0.88958	0.895606	0.901248	0.897363	0.906228	0.896098	-0.0681183	-0.098128	0.158023	0.642452	0.881693	-0.0706483	0.834144	0.241762	0.419579	0.842808	-0.195396	-0.19896	-0.187665	-0.111143	0.439062	-0.0972932	-0.138573	-0.0395142	-0.192483	-0.233821	-0.0473731	-0.219905	0.0944464	-0.158264	-0.159128	0.0228525	0.0312448	-0.0571593	-0.0138067	0.0675638	-0.150415	-0.235417	0.050753	0.394131
Geobacillus subterraneus	-0.242328	-0.21702	0.0119043	0.0187106	-0.126915	-0.0142654	-0.0713848	0.0172571	-0.00278709	0.00646156	0.00596242	0.0174708	0.0131034	0.0241871	0.0169013	-0.152752	0.6492	-0.0234909	-0.0420616	0.0111915	-0.222887	-0.00761792	-0.143293	-0.0726806	-0.0184501	-0.172978	-0.222171	-0.162083	-0.163873	-0.0869756	-0.19082	-0.207206	-0.131839	-0.173283	-0.144983	-0.198176	-0.0893309	-0.105857	-0.153062	-0.138419	-0.0874182	-0.125761	-0.112078	-0.0206892	-0.0244371	0.0233755	-0.223143	-0.0726651	-0.0666411
Geobacillus thermocatenulatus	-0.150484	-0.166589	0.0285894	0.032942	-0.0841519	0.00634784	-0.0382043	0.033088	0.0167729	0.0229429	0.0218641	0.0329073	0.0292604	0.0396742	0.0325605	-0.129789	0.675874	-0.0277877	-0.0154298	0.029167	-0.177374	0.00872447	-0.0944783	-0.0438054	0.00287899	-0.134463	-0.189602	-0.133091	-0.127472	-0.0800849	-0.168887	-0.171072	-0.124267	-0.119371	-0.105232	-0.145831	-0.0700517	-0.0760716	-0.108438	-0.0938058	-0.0693199	-0.0822912	-0.101708	-0.0525064	0.00386316	0.0534091	-0.17454	-0.052974	-0.046106
Geobacillus genomosp. 3	-0.208864	-0.209603	-0.0167299	-0.0107407	-0.146152	-0.0419068	-0.09571	-0.0116321	-0.0311501	-0.0220898	-0.0226722	-0.0114619	-0.0154672	-0.00483961	-0.0118222	-0.148288	0.636772	-0.0208894	-0.0617784	-0.0188566	-0.217743	-0.0357933	-0.151857	-0.0862721	-0.0465481	-0.165374	-0.20437	-0.160818	-0.157697	-0.099539	-0.178796	-0.198107	-0.146906	-0.163924	-0.135064	-0.192708	-0.0726998	-0.108909	-0.144242	-0.130805	-0.0847512	-0.122601	-0.115235	-0.0244869	-0.0327747	0.0418528	-0.211466	-0.0750533	-0.071223
Anoxybacillus amylolyticus	-0.207181	-0.200138	0.0285574	0.0351949	-0.111689	0.00196519	-0.0535518	0.0338209	0.0133541	0.0222398	0.0204077	0.0338752	0.0297337	0.0409022	0.0333339	-0.147843	0.617208	-0.017667	-0.0284054	0.0294215	-0.218313	0.00423672	-0.122971	-0.0631592	-0.000570905	-0.149098	-0.224745	-0.161157	-0.163539	-0.099888	-0.199375	-0.200603	-0.129636	-0.166793	-0.135921	-0.186568	-0.0994175	-0.0936018	-0.140595	-0.133114	-0.0765918	-0.116188	-0.122978	-0.0526846	-0.020764	0.0811861	-0.218258	-0.068578	-0.0564027
Weizmannia coagulans	-0.667659	-0.26	0.512141	0.528255	0.268268	0.501492	0.386772	0.52071	0.493185	0.508387	0.511986	0.521317	0.52041	0.52642	0.516154	-0.132183	-0.211931	0.0163939	0.306604	0.538907	-0.242322	0.463913	0.0133658	0.149125	0.450964	-0.297851	-0.274625	-0.238658	-0.217714	0.42312	-0.00315483	-0.227861	-0.0486337	-0.267214	-0.298283	-0.222683	-0.173615	-0.0322845	-0.27472	-0.226103	-0.0792151	-0.137014	-0.0874755	0.264472	-0.0736229	-0.223227	-0.326963	0.0501523	0.369415
Parageobacillus thermoglucosidasius	-0.451971	-0.132939	0.779161	0.791007	0.537323	0.755345	0.664152	0.786317	0.762983	0.771264	0.773178	0.786073	0.781726	0.794049	0.780773	-0.134841	0.27461	0.0511896	0.536805	0.775552	-0.135421	0.716628	0.154512	0.339358	0.717361	-0.215705	-0.243427	-0.224784	-0.172619	0.378672	-0.104625	-0.200741	-0.0680338	-0.209497	-0.23278	-0.105713	-0.172386	0.0460004	-0.166307	-0.174789	-0.076945	-0.0145423	-0.078033	0.0162118	0.0822352	-0.0837192	-0.268909	0.0741294	0.332419
Sediminibacillus sp. DP4-553-S	-0.630123	-0.193846	0.710516	0.726412	0.460014	0.70161	0.587868	0.718655	0.693546	0.708103	0.711804	0.718924	0.715804	0.723954	0.713315	-0.128518	-0.195965	0.0561145	0.470982	0.712237	-0.181156	0.658041	0.0956082	0.276549	0.64248	-0.259874	-0.244167	-0.245225	-0.194221	0.531721	-0.0199136	-0.204761	-0.0381963	-0.253386	-0.289918	-0.156715	-0.167473	0.00559578	-0.236624	-0.215198	-0.0977116	-0.0784135	-0.0561745	0.245407	-0.0104554	-0.200388	-0.307095	0.118466	0.401994
Paenibacillus sp. B01	-0.655126	-0.393359	-0.00673928	0.0039418	-0.229119	-0.0199709	-0.140407	0.00265194	-0.0302396	-0.0085292	-0.00331917	0.00361811	-0.000384238	0.00906058	0.000744582	-0.226243	0.1376	-0.0542604	-0.105608	0.01343	-0.376558	-0.0333505	-0.249928	-0.165953	-0.0649611	-0.327328	-0.328946	-0.239189	-0.270927	0.165927	-0.110545	-0.30572	-0.0851776	-0.325188	-0.278967	-0.345865	-0.100753	-0.197769	-0.308516	-0.268088	-0.100306	-0.282463	-0.182752	0.360747	-0.143901	-0.169386	-0.366189	-0.00515534	0.0405511
Paenibacillus sp. DCT19	-0.682295	-0.34757	0.141568	0.1605	-0.0771259	0.140757	0.0169901	0.149778	0.121972	0.143242	0.15076	0.150902	0.149574	0.154363	0.147252	-0.178799	-0.301425	0.00664745	0.0187415	0.162622	-0.326495	0.12631	-0.176602	-0.0702594	0.0801985	-0.321196	-0.29564	-0.258459	-0.227826	0.334606	-0.0172248	-0.255136	-0.0689135	-0.291344	-0.314269	-0.313436	-0.126517	-0.150556	-0.319612	-0.247515	-0.0634866	-0.233857	-0.0500729	0.413686	-0.148783	-0.225347	-0.359735	0.0698666	0.209143
Paenibacillus sp. PK3_47	-0.54049	-0.298421	-0.0279096	-0.0200656	-0.184665	-0.0138597	-0.121261	-0.0206465	-0.043089	-0.0233454	-0.0182611	-0.0201333	-0.0193649	-0.016994	-0.0224641	-0.151067	-0.218685	-0.0286557	-0.0924385	0.00468815	-0.282007	-0.0467593	-0.20965	-0.137372	-0.0739316	-0.252688	-0.230241	-0.198468	-0.182414	0.345879	0.0446263	-0.185477	-0.0719811	-0.224872	-0.245183	-0.279556	-0.0427996	-0.158569	-0.257135	-0.195331	-0.027223	-0.221658	-0.135011	0.505549	-0.193313	-0.175532	-0.278829	0.0294969	0.194712
Paenibacillus sp. FSL P4-0081	-0.63745	-0.351216	-0.0328413	-0.0215509	-0.219252	-0.0290881	-0.144367	-0.0246164	-0.0515825	-0.0298802	-0.0238891	-0.0236306	-0.0248215	-0.0208123	-0.026132	-0.174604	-0.23294	-0.0283508	-0.1109	-0.00368829	-0.3319	-0.0501588	-0.221743	-0.162077	-0.0817376	-0.298365	-0.287287	-0.20787	-0.218342	0.278948	-0.0308985	-0.236364	-0.0468879	-0.278295	-0.270727	-0.319516	-0.0963268	-0.177058	-0.295916	-0.234703	-0.0532858	-0.261899	-0.142246	0.47172	-0.182276	-0.205127	-0.32283	0.0294606	0.129049
Paenibacillus sp. sptzw28	-0.546137	-0.289124	0.0562576	0.0622172	-0.114794	0.0679026	-0.0431252	0.0636253	0.0409219	0.0611729	0.0646496	0.0640609	0.0634076	0.0674071	0.0614598	-0.152575	-0.202092	-0.0340649	-0.0287434	0.0773736	-0.274709	0.0264696	-0.184903	-0.0909731	0.00669045	-0.257055	-0.215041	-0.206916	-0.187211	0.383573	0.0230843	-0.189978	-0.100758	-0.238566	-0.243462	-0.266302	-0.0375441	-0.145051	-0.248592	-0.203037	-0.0512969	-0.206708	-0.169017	0.498042	-0.192474	-0.178688	-0.281438	0.0211367	0.207829
Paenibacillus riograndensis	-0.630263	-0.346634	-0.0509303	-0.0353596	-0.232119	-0.0442079	-0.159525	-0.0426966	-0.0691493	-0.046662	-0.039515	-0.0418128	-0.0423632	-0.0391624	-0.0437474	-0.168091	-0.27116	0.0585482	-0.115794	-0.0293577	-0.328633	-0.0565567	-0.239893	-0.167382	-0.101003	-0.29015	-0.279527	-0.23097	-0.206416	0.282298	-0.0260137	-0.228092	-0.0717302	-0.270802	-0.290486	-0.323421	-0.103901	-0.18894	-0.309316	-0.231515	-0.0489276	-0.253969	-0.0877671	0.465627	-0.19364	-0.186314	-0.331525	0.0388921	0.13715
Paenibacillus cellulositrophicus	-0.657739	-0.347798	0.0276421	0.0409884	-0.169195	0.0302032	-0.0883036	0.0360151	0.0086021	0.0314061	0.0380616	0.03701	0.0348826	0.0396781	0.0345589	-0.173063	-0.267886	0.0029243	-0.0634792	0.0417668	-0.325438	0.0101773	-0.209416	-0.129192	-0.025308	-0.301684	-0.278027	-0.22624	-0.217077	0.302069	-0.0564873	-0.240912	-0.070765	-0.290072	-0.284142	-0.310671	-0.10644	-0.172032	-0.301011	-0.244037	-0.0588372	-0.25042	-0.131095	0.455354	-0.180301	-0.20521	-0.333886	0.0354557	0.134662
Paenibacillus lautus	-0.473567	-0.247633	0.0127006	0.0159908	-0.123221	0.0331103	-0.0662117	0.0191073	0.000534896	0.0176206	0.0212325	0.0192145	0.0214332	0.0223318	0.0168915	-0.125014	-0.225446	-0.0339336	-0.0515438	0.0504002	-0.231815	-0.0152466	-0.166768	-0.0978336	-0.029552	-0.212917	-0.198099	-0.176586	-0.156972	0.404942	0.0849019	-0.141012	-0.0641112	-0.185856	-0.220858	-0.23361	-0.0257549	-0.131848	-0.224608	-0.167922	-0.00674858	-0.187907	-0.163214	0.520485	-0.19252	-0.152785	-0.238319	0.0245862	0.253437
Brevibacillus choshinensis	-0.545488	-0.366071	0.048891	0.0650373	-0.1784	0.032302	-0.0814106	0.0583268	0.0260905	0.0467959	0.0482195	0.0586803	0.053478	0.0654262	0.0558305	-0.225669	0.0557529	-0.0349915	-0.0628183	0.051708	-0.370024	0.0168678	-0.185415	-0.118221	-0.00271451	-0.267335	-0.317515	-0.24318	-0.216413	0.12894	-0.20239	-0.301353	-0.124316	-0.305999	-0.238364	-0.31186	-0.0997269	-0.161575	-0.264128	-0.256871	-0.0856202	-0.231622	-0.144213	0.2476	-0.0926498	0.0462995	-0.333447	0.0736693	0.0687369
Staphylococcus simiae	-0.361366	-0.182466	0.0955553	0.113427	-0.0224957	0.0706044	0.0283268	0.0992815	0.0835971	0.0935357	0.0925077	0.10049	0.0980024	0.101087	0.100195	-0.022279	-0.179304	-0.0165471	0.0193297	0.0807455	-0.163587	0.0888916	-0.0584078	-0.024851	0.0778472	-0.169637	-0.122009	-0.128769	-0.122671	-0.0563745	-0.139192	-0.145332	-0.107004	-0.168013	-0.163597	-0.140795	-0.168975	-0.0325253	-0.181818	-0.133065	-0.0980008	-0.0940602	0.00086031	-0.0726575	-0.102418	-0.12306	-0.190733	-0.0985887	0.0374629
Gemella sanguinis	-0.390986	-0.0114975	-0.0392353	-0.0329573	-0.139508	-0.0317542	-0.0910566	-0.0329042	-0.0505858	-0.0398119	0.00302097	-0.0331438	-0.0362484	-0.0314148	-0.0345911	-0.117043	-0.210036	0.00944353	-0.066375	-0.0479344	-0.169629	-0.0361204	-0.143583	-0.112775	-0.061527	-0.17207	-0.187496	-0.0983644	0.0470163	-0.0313009	-0.1139	-0.0453274	-0.119328	-0.19385	-0.184346	-0.166013	-0.0709735	-0.137627	-0.166684	-0.140894	0.790205	-0.127703	-0.12765	0.044146	-0.130661	-0.119933	-0.188789	-0.121992	-0.0160512
Gemella haemolysans	-0.372063	-0.155683	0.0443549	0.0412641	-0.0779817	0.0298631	-0.0192234	0.0482883	0.0155754	0.0428364	0.0485688	0.0476629	0.0521084	0.0403102	0.0536787	0.0175409	-0.0392366	0.979313	0.0384122	0.0267341	-0.185701	0.0244344	-0.11208	-0.061583	0.00985814	-0.130353	-0.178091	-0.166991	-0.117669	-0.0521085	-0.156493	-0.176836	-0.0850335	-0.180053	-0.180511	-0.172371	-0.171008	-0.143251	-0.198312	-0.165455	0.0290151	-0.115769	-0.129368	-0.0239994	-0.0937579	0.088645	-0.18134	-0.125221	-0.0426896
Erysipelotrichaceae bacterium I46	-0.65222	-0.314376	0.274791	0.313453	0.046571	0.239967	0.148506	0.282684	0.253171	0.269682	0.281067	0.284633	0.277833	0.288033	0.281434	-0.173066	-0.0322345	0.0552763	0.124108	0.254374	-0.292189	0.304866	-0.089973	0.0138547	0.217966	-0.316082	-0.329184	-0.257763	-0.208344	0.0193325	-0.215978	-0.290697	-0.00352987	-0.298704	-0.314007	-0.268896	-0.258494	-0.10642	-0.308577	-0.235352	-0.133606	-0.174792	0.208856	-0.021038	0.0397178	-0.215553	-0.363681	0.145163	-0.000459461
Allobaculum mucolyticum	-0.371103	-0.00827097	0.964933	0.97416	0.766519	0.95171	0.882823	0.969546	0.956378	0.960194	0.959947	0.969152	0.965658	0.973761	0.963402	-0.0514439	-0.0792101	0.0527282	0.703039	0.956211	-0.00228409	0.901062	0.310277	0.484612	0.914553	-0.138494	-0.151379	-0.148558	-0.095842	0.531327	-0.0350527	-0.0994	0.0277238	-0.1311	-0.17544	0.0184791	-0.170624	0.140806	-0.0893761	-0.112553	-0.0837661	0.077018	-0.0207791	0.0316528	0.133297	-0.12904	-0.16844	0.146044	0.43313
Allobaculum sp. Allo2	-0.450116	-0.0618263	0.921906	0.933934	0.703362	0.908199	0.826217	0.927519	0.910613	0.917543	0.918823	0.927333	0.923106	0.932172	0.92151	-0.0789574	-0.0915256	0.0469474	0.658346	0.910983	-0.0515964	0.862469	0.26033	0.440827	0.865202	-0.175394	-0.18144	-0.179175	-0.124646	0.532794	-0.0497686	-0.135388	0.0146398	-0.170655	-0.207961	-0.0262838	-0.174439	0.105539	-0.128042	-0.144659	-0.0955957	0.0374428	-0.0172653	0.0775727	0.110936	-0.149826	-0.209557	0.156404	0.413984
Erysipelothrix sp. HDW6C	-0.349042	0.00407962	0.954679	0.962168	0.762481	0.94346	0.875577	0.959092	0.946681	0.951182	0.950686	0.958525	0.95473	0.962961	0.953183	-0.0464663	-0.0786806	0.0601376	0.699652	0.93958	0.00671218	0.888866	0.305777	0.483223	0.9055	-0.12694	-0.140591	-0.147177	-0.086834	0.544653	-0.0470169	-0.0877757	0.0136389	-0.121325	-0.171872	0.0266865	-0.166015	0.135695	-0.0833857	-0.110387	-0.0762214	0.0808	-0.0437149	0.0450256	0.119714	-0.119499	-0.163076	0.131506	0.424476
Tannockella kyphosi	-0.624289	-0.16414	0.594283	0.605801	0.358866	0.596796	0.478709	0.602656	0.578173	0.595161	0.608002	0.60259	0.599347	0.607285	0.597718	-0.140776	-0.224768	0.0349655	0.387818	0.59421	-0.191097	0.544223	0.0442678	0.211561	0.53074	-0.262072	-0.262029	-0.232968	-0.144831	0.539411	-0.0438128	-0.16964	-0.0639711	-0.256763	-0.29626	-0.17617	-0.152909	-0.0363451	-0.240055	-0.216318	0.116869	-0.100531	-0.124464	0.320581	-0.0614253	-0.203566	-0.308186	0.0778427	0.370361
Bulleidia sp. zg-1006	-0.516743	-0.00678892	0.720019	0.733072	0.505108	0.706572	0.625529	0.72787	0.706023	0.7132	0.740488	0.727039	0.723058	0.732228	0.72215	-0.11126	-0.131776	0.326839	0.522792	0.706299	-0.0988679	0.678531	0.154284	0.309242	0.670377	-0.204516	-0.234424	-0.178178	-0.0468874	0.290597	-0.126249	-0.119981	-0.0585195	-0.218096	-0.252121	-0.0870661	-0.204793	0.0185183	-0.174194	-0.174498	0.409488	-0.0066998	-0.075951	-0.0601402	0.0470236	-0.124575	-0.251022	-0.00535939	0.28107
Intestinibaculum porci	-0.642201	-0.199615	0.65274	0.665401	0.405044	0.649419	0.532807	0.661192	0.635769	0.651502	0.658645	0.661189	0.659014	0.666709	0.655523	-0.133629	-0.200465	0.0197998	0.426608	0.66661	-0.189716	0.594777	0.074629	0.239567	0.592214	-0.275815	-0.260959	-0.231601	-0.181532	0.55702	-0.0124682	-0.183225	-0.0471598	-0.257559	-0.295933	-0.179348	-0.145874	-0.0112199	-0.244144	-0.217889	0.0119511	-0.0974479	-0.101222	0.297478	-0.04815	-0.215942	-0.313374	0.0698835	0.434124
Faecalibaculum rodentium	-0.33622	0.0130376	0.976708	0.984548	0.785718	0.962594	0.899372	0.980931	0.968854	0.970912	0.97025	0.980431	0.97731	0.985266	0.974657	-0.0411678	-0.0430062	0.0483226	0.715236	0.970153	0.0149985	0.909801	0.322699	0.49745	0.928798	-0.120452	-0.134028	-0.140211	-0.0886155	0.515303	-0.0209099	-0.0870468	0.0203822	-0.116196	-0.161443	0.0354456	-0.160898	0.153626	-0.0733668	-0.100295	-0.0726029	0.0927387	-0.0240423	-0.00291735	0.137574	-0.113766	-0.152896	0.128241	0.44151
Phascolarctobacterium sp. Marseille-Q4147	-0.637491	-0.312496	0.109006	0.121308	-0.088018	0.117525	-0.00283488	0.117567	0.0907828	0.111466	0.11864	0.118098	0.118333	0.121914	0.114982	-0.16241	-0.266839	0.0461452	0.00541379	0.136867	-0.300081	0.0839883	-0.179367	-0.0787144	0.05281	-0.283237	-0.264491	-0.238001	-0.207272	0.377881	0.0244553	-0.217158	-0.0828407	-0.264746	-0.292924	-0.293148	-0.0895142	-0.150621	-0.294589	-0.230319	-0.0160104	-0.221661	-0.125481	0.465759	-0.183942	-0.186362	-0.326933	0.0324815	0.244423
Veillonella parvula	-0.393851	-0.179532	0.0933245	0.112079	0.0853089	0.110512	0.0820964	0.098249	0.0974996	0.0937439	0.0860975	0.0987	0.112938	0.108459	0.0953112	-0.0159898	-0.0605504	0.317049	0.0499524	0.10523	0.0868777	0.0788766	-0.0859909	0.0508638	0.0795385	-0.0506039	0.0294519	-0.115636	-0.056991	0.0813246	0.034504	0.00858073	-0.0078589	-0.108098	-0.120744	-0.0667623	-0.159343	0.0497977	-0.123081	-0.118596	0.00976785	-0.0480147	-0.0961432	0.0527611	-0.0674371	-0.045828	-0.0914425	-0.0889465	0.179676
Megasphaera elsdenii	-0.58969	-0.308158	0.0117752	0.0199385	-0.161218	0.0210598	-0.0890064	0.0199236	-0.00368373	0.0133784	0.0199499	0.0206278	0.0220598	0.0243045	0.017724	-0.154906	-0.231586	-0.0250808	-0.0600911	0.0572512	-0.301402	-0.0113384	-0.189826	-0.114217	-0.033612	-0.276928	-0.225818	-0.186385	-0.194256	0.318789	0.0670093	-0.198717	-0.0778552	-0.240748	-0.236324	-0.286817	-0.0347798	-0.134	-0.253339	-0.195286	0.0143079	-0.213405	-0.156737	0.462285	-0.19212	-0.193893	-0.283778	0.000371279	0.22013
Dialister pneumosintes	-0.523313	-0.316174	-0.0441072	-0.0479904	-0.198816	-0.0590099	-0.136899	-0.0384176	-0.0589721	-0.0449809	-0.0430579	-0.0350084	-0.034956	-0.0425257	-0.0322727	-0.0698895	-0.110931	-0.0418397	-0.0404141	-0.0090841	-0.32872	-0.0449185	-0.103284	-0.0509835	-0.0684194	-0.273316	-0.0941521	-0.00373779	-0.193668	-0.0138569	-0.0203035	-0.237903	-0.0465587	-0.223947	-0.0157739	-0.239211	0.0814386	-0.00486404	-0.0788765	-0.0964832	-0.0423374	-0.110991	-0.175942	0.178242	-0.0848848	-0.19432	-0.153192	-0.0343905	-0.0595479
Selenomo1s sputige1	-0.719547	-0.323239	0.245297	0.250758	0.0158326	0.226921	0.120991	0.255773	0.227287	0.242082	0.249393	0.255961	0.252372	0.260827	0.250296	-0.196088	-0.0698217	-0.0138161	0.0903354	0.281202	-0.325925	0.189447	-0.0778624	0.00304921	0.2023	-0.348082	-0.242341	-0.133203	-0.13872	0.286484	-0.0444581	-0.282343	-0.0601223	-0.288329	-0.203421	-0.292137	0.00632635	-0.0988721	-0.235338	-0.27512	-0.0897127	-0.202784	-0.171862	0.358703	-0.0421679	-0.26819	-0.261433	0.0138244	0.231331
Murdochiella vagi1lis	-0.35971	-0.188725	-0.0307036	-0.0190302	-0.143724	-0.0485673	-0.0974516	-0.0243336	-0.0430133	-0.0346259	-0.0296773	-0.0252945	-0.0241476	-0.0226222	-0.0243617	-0.100304	-0.0340832	0.988691	0.00215335	-0.0308332	-0.182218	-0.0263966	-0.130806	-0.078539	-0.0501471	-0.151516	-0.175906	-0.145918	-0.12022	-0.0787682	-0.144094	-0.184013	-0.0739322	-0.165322	-0.170712	-0.189681	-0.153086	-0.139659	-0.189613	-0.146337	-0.0686946	-0.114393	-0.0864012	0.00628781	-0.0754268	0.0529412	-0.203852	-0.113492	-0.0682906
Helcococcus kunzii	-0.353083	-0.15004	-0.0235425	-0.0133749	-0.131799	-0.0380737	-0.0858955	-0.0169703	-0.0353208	-0.0276768	-0.0166689	-0.0180988	-0.0167395	-0.0152281	-0.0173302	-0.101561	-0.0390109	0.977671	0.0104625	-0.0236318	-0.168591	-0.0200832	-0.125309	-0.0732102	-0.0423594	-0.144352	-0.175993	-0.137693	-0.0897627	-0.0861671	-0.141286	-0.160817	-0.0810874	-0.162855	-0.170185	-0.180486	-0.147101	-0.139046	-0.181018	-0.142071	0.0697128	-0.106545	-0.106581	-0.0116196	-0.0781976	0.0530829	-0.197187	-0.133437	-0.0641798
Finegoldia mag1	-0.365377	-0.175603	0.00187508	0.0135687	-0.116713	-0.0161953	-0.0665136	0.00843911	-0.0105828	-0.00245002	0.00429945	0.0074339	0.00823991	0.010289	0.00815252	-0.104171	-0.0255436	0.990223	0.0273392	0.000616789	-0.179111	0.00474735	-0.118969	-0.0612065	-0.018892	-0.15149	-0.183212	-0.147548	-0.114582	-0.0751841	-0.150273	-0.182435	-0.0741081	-0.1699	-0.17503	-0.186522	-0.158041	-0.135505	-0.188423	-0.148407	-0.0311694	-0.108712	-0.0885711	-0.00866494	-0.0673244	0.0538688	-0.207756	-0.113376	-0.0620828
Ezakiella coagulans	-0.433576	-0.206937	-0.0374854	-0.0232027	-0.169527	-0.0543797	-0.115096	-0.0300814	-0.0518041	-0.0410617	-0.0313067	-0.0308841	-0.0302877	-0.0280732	-0.0302142	-0.119733	-0.0756051	0.968944	-0.0126945	-0.0384115	-0.216297	-0.0303356	-0.158513	-0.0990622	-0.06227	-0.183478	-0.211415	-0.16933	-0.126581	-0.0714913	-0.155351	-0.199675	-0.0846734	-0.200342	-0.20806	-0.223492	-0.169691	-0.16258	-0.225525	-0.172525	0.00538418	-0.141287	-0.0880839	0.0299811	-0.0962808	0.0254038	-0.242093	-0.115699	-0.0644532
Ezakiella massiliensis	-0.37076	-0.158162	-0.0283995	-0.0168108	-0.141481	-0.0442264	-0.0939436	-0.0216496	-0.0409826	-0.0327799	-0.0213962	-0.0227162	-0.0218135	-0.0199081	-0.0220263	-0.107703	-0.042193	0.976501	0.00368711	-0.0293704	-0.17946	-0.0219287	-0.134318	-0.0807357	-0.0488991	-0.152946	-0.186931	-0.144267	-0.0972481	-0.0930181	-0.144771	-0.168806	-0.0749244	-0.172658	-0.180699	-0.189192	-0.154728	-0.14759	-0.193203	-0.149822	0.0599429	-0.115813	-0.0910605	-0.0121865	-0.0759526	0.0456213	-0.208187	-0.122654	-0.0734377
Eggerthella sp. YY7918	-0.652927	-0.394292	-0.0439634	-0.0153383	-0.242	-0.10228	-0.176373	-0.0357952	-0.0696857	-0.0558989	-0.0453382	-0.0327733	-0.0423229	-0.0305617	-0.0357017	-0.199286	0.132917	-0.0461869	-0.143465	-0.0628558	-0.37612	-0.020618	-0.232975	-0.186762	-0.0923295	-0.333914	-0.26816	-0.194673	-0.27258	-0.354689	-0.250674	-0.374064	-0.0550444	-0.355718	-0.226103	-0.318623	-0.156327	-0.167337	-0.28635	-0.261305	-0.181486	-0.260298	0.0739399	-0.147664	-0.00754069	-0.23029	-0.333909	-0.0133534	-0.283106
Berryella intesti1lis	-0.594346	-0.279345	0.0507563	0.0538106	-0.140281	0.00606827	-0.0637028	0.0590061	0.0281489	0.0373662	0.0534485	0.0604356	0.0529478	0.064088	0.0567065	-0.186074	0.229008	-0.0286509	-0.054442	0.0491308	-0.299671	0.0148372	-0.177599	-0.117558	0.00803848	-0.30665	-0.168885	-0.123145	-0.210315	-0.228221	-0.139776	-0.295916	-0.126412	-0.319171	-0.148289	-0.238252	-0.0142699	-0.127527	-0.195393	-0.237753	0.0881683	-0.209459	-0.212547	-0.0721132	-0.0607116	-0.22578	-0.246024	-0.170853	-0.152544
Slackia heliotrinireducens	-0.714048	-0.252167	0.128079	0.134904	-0.0991207	0.0945504	-0.000294991	0.13834	0.103145	0.116711	0.147072	0.139409	0.132004	0.144119	0.135125	-0.213609	0.111958	-0.020524	-0.000651156	0.128019	-0.329656	0.0920137	-0.180423	-0.0982308	0.0761881	-0.349392	-0.251636	-0.17053	-0.179958	-0.114242	-0.160379	-0.275964	-0.141722	-0.367083	-0.232864	-0.276054	-0.0755342	-0.154355	-0.253308	-0.272285	0.376986	-0.229372	-0.238659	-0.00196268	-0.0974744	-0.257075	-0.315687	-0.17136	-0.0672554
Phoenicibacter congonensis	-0.621094	-0.32584	0.0711027	0.112096	-0.124879	0.0285416	-0.0420131	0.0788517	0.0509206	0.0644943	0.0800988	0.0817513	0.0739804	0.0831669	0.0792359	-0.181403	-0.120768	0.0521316	-0.0223117	0.0479247	-0.314538	0.125091	-0.141783	-0.0819271	0.0261985	-0.310563	-0.246215	-0.190068	-0.185326	-0.221217	-0.229826	-0.287628	0.00432968	-0.31088	-0.223671	-0.267389	-0.186451	-0.11795	-0.246446	-0.204311	-0.0708865	-0.180087	0.249719	-0.124398	0.0711533	-0.206333	-0.308175	0.142363	-0.187795
Denitrobacterium detoxificans	-0.552541	-0.298555	0.0473472	0.049753	-0.137052	-0.00170947	-0.065464	0.0547598	0.0254136	0.0336656	0.0421974	0.0562834	0.0487711	0.0599061	0.0530396	-0.173262	0.308925	-0.0167702	-0.0535293	0.0453637	-0.288596	0.0106134	-0.166193	-0.112733	0.00756081	-0.29163	-0.16537	-0.11917	-0.239012	-0.243851	-0.154205	-0.308014	-0.10977	-0.30097	-0.133805	-0.227168	-0.0299534	-0.114158	-0.186881	-0.227074	-0.0604851	-0.203426	-0.21009	-0.0914097	-0.0507119	-0.209381	-0.236769	-0.170916	-0.173372
Collinsella sp. zg1085	-0.465043	-0.194552	0.0975839	0.111336	-0.0587598	0.0722266	0.010302	0.105417	0.0818334	0.0910356	0.101908	0.104563	0.104141	0.108186	0.104408	-0.123266	-0.00849119	0.965831	0.0858969	0.0932347	-0.208784	0.0924663	-0.10818	-0.029147	0.0687086	-0.200621	-0.216324	-0.173517	-0.134717	-0.0749475	-0.178009	-0.216618	-0.0948964	-0.216266	-0.211919	-0.207976	-0.185031	-0.133611	-0.221278	-0.183189	0.0214209	-0.120929	-0.107064	-0.0467492	-0.0647418	0.00718888	-0.25147	-0.135739	-0.0426241
Coriobacterium glomerans	-0.714181	-0.31345	0.402634	0.415178	0.142757	0.347067	0.258572	0.411745	0.377314	0.387608	0.396164	0.413364	0.404537	0.417673	0.408055	-0.189235	0.120812	0.0874392	0.208591	0.395053	-0.294587	0.357469	-0.038413	0.064747	0.345052	-0.344203	-0.245925	-0.177341	-0.274495	-0.0673746	-0.192958	-0.351972	-0.0506274	-0.354377	-0.212726	-0.228079	-0.141659	-0.062726	-0.23722	-0.271686	-0.12318	-0.18052	-0.144008	-0.0993813	0.0240395	-0.246904	-0.311003	-0.0597741	-0.0361007
Parolsenella cate1	-0.598592	-0.189425	0.718727	0.73289	0.463516	0.677062	0.591716	0.726296	0.700002	0.708638	0.710585	0.726984	0.720645	0.732226	0.722142	-0.10747	0.0830097	0.0610821	0.476824	0.706063	-0.177937	0.658005	0.13301	0.285748	0.665678	-0.274662	-0.224953	-0.195004	-0.205314	0.211336	-0.16828	-0.246583	-0.0753729	-0.268429	-0.234047	-0.130636	-0.213489	0.0459043	-0.203064	-0.213663	-0.123025	-0.0535543	-0.109176	-0.088823	0.0327344	-0.209312	-0.283468	-0.0374147	0.22893
Olsenella uli	-0.562095	-0.115913	0.0057666	0.0237859	-0.152786	-0.00978953	-0.0814335	0.0137927	-0.0123792	0.000265253	0.0429185	0.0146617	0.00917995	0.0165653	0.0122778	-0.147474	-0.222109	-0.00120191	-0.0630076	-0.0102562	-0.253663	0.0173709	-0.170972	-0.128249	-0.0284341	-0.262746	-0.243257	-0.149802	-0.0335675	-0.172727	-0.180184	-0.150277	-0.131454	-0.28201	-0.243569	-0.234309	-0.13869	-0.149894	-0.243024	-0.204067	0.678109	-0.176307	-0.0546949	-0.0880885	-0.112398	-0.190006	-0.274504	-0.127084	-0.0784264
Olsenella timonensis	-0.630021	-0.226322	0.561758	0.571581	0.311966	0.514459	0.430076	0.570351	0.53977	0.547777	0.556487	0.571107	0.563608	0.576527	0.565874	-0.160229	0.192634	0.188524	0.353642	0.543039	-0.219224	0.505999	0.0202983	0.179023	0.500639	-0.294748	-0.183368	-0.196683	-0.232102	0.0560248	-0.135823	-0.297372	-0.11585	-0.30802	-0.211348	-0.162747	-0.109453	-0.0243185	-0.20085	-0.241002	-0.0810645	-0.102785	-0.140747	-0.114682	0.0260834	-0.2034	-0.280366	-0.0741235	0.0851964
Parafannyhessea umbo1ta	-0.738013	-0.314565	0.42811	0.464244	0.163779	0.388241	0.286822	0.437358	0.404237	0.420699	0.434836	0.439336	0.431063	0.442721	0.43466	-0.199274	-0.136931	0.152899	0.23854	0.406206	-0.300464	0.439261	-0.0368714	0.0889068	0.362448	-0.344262	-0.318189	-0.251677	-0.224787	0.0641527	-0.217444	-0.318763	0.00983987	-0.346277	-0.302307	-0.257935	-0.240575	-0.0875943	-0.290664	-0.258509	-0.102087	-0.166973	0.153324	-0.0177322	0.0833032	-0.227816	-0.369291	0.166912	0.0192782
Thermophilibacter immobilis	-0.633144	-0.228037	0.543958	0.551187	0.296844	0.493975	0.413987	0.552282	0.522173	0.528975	0.537219	0.553263	0.545382	0.557951	0.547525	-0.164599	0.125554	0.126334	0.334715	0.541618	-0.222701	0.485027	0.0589854	0.167777	0.490897	-0.296652	-0.225885	-0.145042	-0.230814	0.0255247	-0.169648	-0.29831	-0.0185283	-0.307384	-0.181037	-0.162546	-0.141381	-0.00938355	-0.184502	-0.235465	-0.0659061	-0.119792	-0.175868	-0.108107	0.0643273	-0.214663	-0.264017	-0.0473605	0.0421104
Actinomyces sp. HMT 175	-0.677503	-0.24258	-0.0492239	-0.0333419	-0.235122	-0.0672173	-0.151572	-0.0393928	-0.0718004	-0.0555465	-0.0237626	-0.0394529	-0.0429985	-0.0353175	-0.0412495	-0.157837	-0.260307	0.211215	-0.113789	-0.0545711	-0.325867	-0.0601257	-0.207156	-0.186399	-0.0790382	-0.302757	-0.235379	-0.18684	-0.0997567	-0.0946184	-0.191044	-0.206132	-0.159918	-0.31791	-0.243083	-0.271783	-0.133439	-0.17817	-0.276862	-0.252702	0.479483	-0.222911	-0.175017	0.0290802	-0.187686	-0.146359	-0.283564	-0.15913	-0.0290033
Actinomyces sp. MAS-1	-0.395506	-0.00616517	-0.0237742	-0.0180601	-0.12781	-0.022649	-0.0770271	-0.0171418	-0.035177	-0.0267658	0.0166769	-0.0173336	-0.0206553	-0.0153961	-0.0194216	-0.121801	-0.178901	0.00979662	-0.0577123	-0.0285953	-0.172644	-0.0244587	-0.129013	-0.102549	-0.0441584	-0.183079	-0.180987	-0.080276	0.0604044	-0.0913448	-0.117273	-0.0549716	-0.12443	-0.199999	-0.167449	-0.169838	-0.0558424	-0.127804	-0.157213	-0.144927	0.805816	-0.121355	-0.126595	-0.0171843	-0.106836	-0.128161	-0.177041	-0.136054	-0.027332
Actinomyces sp. Chiba101	-0.355975	0.0131477	-0.026541	-0.0204438	-0.119304	-0.0220711	-0.0733572	-0.0204786	-0.0371481	-0.0291035	0.014579	-0.0207643	-0.0231399	-0.0188609	-0.0223635	-0.108545	-0.168597	0.0396614	-0.0507478	-0.0296999	-0.151923	-0.0224866	-0.125696	-0.0980136	-0.046417	-0.160254	-0.18068	-0.0850254	0.0585729	-0.0811545	-0.101149	-0.0375164	-0.116102	-0.176996	-0.172173	-0.153407	-0.0717109	-0.122834	-0.152982	-0.125719	0.816914	-0.109817	-0.112062	-0.0222988	-0.110565	-0.10936	-0.175299	-0.139817	-0.0180984
Actinomyces sp. Z16	-0.434934	-0.0354098	-0.0234468	-0.0165849	-0.140721	-0.0258925	-0.0855785	-0.0165542	-0.0369344	-0.027326	0.016531	-0.0164919	-0.0201925	-0.0145276	-0.0185031	-0.131224	-0.170529	0.0163019	-0.0627435	-0.0287302	-0.191117	-0.0232118	-0.141508	-0.115506	-0.0478223	-0.200319	-0.206257	-0.0952911	0.0235337	-0.112948	-0.138151	-0.0813411	-0.113529	-0.219036	-0.185504	-0.183167	-0.0840363	-0.135446	-0.175701	-0.157579	0.784776	-0.14133	-0.138203	-0.0254664	-0.110671	-0.142001	-0.205256	-0.14569	-0.055592
Actinomyces sp. oral taxon 897	-0.501019	-0.0727679	0.00397195	0.0138382	-0.135618	-0.0048826	-0.0710291	0.0114319	-0.0117731	-0.000778421	0.041039	0.0117891	0.00753721	0.0136981	0.00958123	-0.131328	-0.216305	0.0113168	-0.0527569	-0.00171802	-0.220602	0.000882333	-0.143992	-0.114507	-0.0230709	-0.230818	-0.224463	-0.113114	-0.00727917	-0.126045	-0.156403	-0.11271	-0.123545	-0.249796	-0.20943	-0.205492	-0.115283	-0.134089	-0.206667	-0.180918	0.73222	-0.157809	-0.138047	-0.0442043	-0.125123	-0.166104	-0.236172	-0.161594	-0.0460204
Actinomyces sp. HMT897	-0.454244	-0.0472394	-0.0391245	-0.0300039	-0.15806	-0.0421625	-0.10321	-0.0321676	-0.0522044	-0.0423629	-0.000800415	-0.0318392	-0.0356261	-0.0299489	-0.033908	-0.123947	-0.2057	-0.0207291	-0.0802413	-0.0471869	-0.20047	-0.0378994	-0.157455	-0.127335	-0.0635721	-0.211548	-0.196767	-0.107414	0.0170067	-0.120218	-0.135637	-0.0759562	-0.135737	-0.237551	-0.196855	-0.197441	-0.0963036	-0.138776	-0.19472	-0.165247	0.759295	-0.148809	-0.129306	-0.0307603	-0.13786	-0.15676	-0.213581	-0.153772	-0.0478082
Actinomyces howellii	-0.38734	-0.0045491	-0.0316273	-0.0258609	-0.134175	-0.0309513	-0.0850428	-0.0252305	-0.0434912	-0.0348023	0.0088214	-0.0253218	-0.0287156	-0.0235173	-0.0271559	-0.119496	-0.16465	0.0114391	-0.0624629	-0.0380491	-0.168873	-0.0299724	-0.136268	-0.11012	-0.0537546	-0.176305	-0.186074	-0.0867846	0.0428407	-0.106047	-0.118761	-0.0555109	-0.117452	-0.200471	-0.173599	-0.164984	-0.0713786	-0.130955	-0.160882	-0.141387	0.802396	-0.125826	-0.130031	-0.0296437	-0.112636	-0.126448	-0.185592	-0.145553	-0.0481715
Actinomyces radicidentis	-0.531863	-0.161722	-0.0412859	-0.0249348	-0.190416	-0.0594092	-0.126711	-0.0341137	-0.0576197	-0.0450701	-0.0158355	-0.0330556	-0.0371755	-0.0317258	-0.0341583	-0.106091	-0.240159	-0.0113277	-0.0937383	-0.0541116	-0.256886	-0.0382884	-0.171891	-0.140596	-0.0664589	-0.252121	-0.207243	-0.141203	-0.0687865	-0.163957	-0.180379	-0.156677	-0.164399	-0.261155	-0.222289	-0.233391	-0.145522	-0.125189	-0.239576	-0.191661	0.468669	-0.169773	-0.0978084	-0.0656934	-0.16836	-0.178407	-0.261588	-0.18304	-0.0532955
Actinomyces respiraculi	-0.391291	-0.00855717	-0.0258492	-0.0187123	-0.130265	-0.0237788	-0.0796439	-0.0193608	-0.037684	-0.0287175	0.0153282	-0.0194783	-0.0226659	-0.0175116	-0.0213007	-0.120533	-0.17742	0.0216976	-0.0574356	-0.0328027	-0.171948	-0.022182	-0.137301	-0.107626	-0.0486198	-0.179405	-0.188132	-0.0956936	0.0450667	-0.0876826	-0.115985	-0.0544246	-0.121741	-0.199053	-0.179975	-0.16771	-0.0737542	-0.131764	-0.165057	-0.141462	0.805777	-0.124037	-0.115556	-0.0202115	-0.11497	-0.122659	-0.189333	-0.135045	-0.0340609
Actinomyces slackii	-0.378537	0.00129999	-0.00705017	-0.000729352	-0.109725	-0.00469556	-0.0586888	-0.000738548	-0.0184971	-0.00986428	0.0333757	-0.00102342	-0.00402454	0.00110609	-0.00284126	-0.116208	-0.180337	0.0415691	-0.0393811	-0.0126126	-0.161039	-0.00553345	-0.11883	-0.0932438	-0.0278365	-0.171559	-0.187892	-0.0888575	0.0511019	-0.0776778	-0.123735	-0.0473436	-0.112183	-0.192072	-0.172827	-0.158015	-0.0804764	-0.123168	-0.155896	-0.135578	0.804984	-0.115244	-0.125522	-0.0237878	-0.106681	-0.112654	-0.181549	-0.13244	-0.027646
Actinomyces procaprae	-0.367665	-0.00781384	-0.0302704	-0.0231928	-0.132912	-0.028898	-0.0831179	-0.0239219	-0.0414077	-0.0327025	0.0109374	-0.0240285	-0.0273343	-0.0221888	-0.0257836	-0.119642	-0.166477	0.0173959	-0.0594184	-0.0381991	-0.169214	-0.0270715	-0.135536	-0.106728	-0.0509765	-0.176483	-0.198779	-0.0899746	0.0510251	-0.0896334	-0.12954	-0.0548064	-0.115956	-0.18829	-0.174678	-0.164369	-0.0848116	-0.126595	-0.160587	-0.137031	0.803176	-0.1212	-0.114655	-0.0227338	-0.114007	-0.122058	-0.189961	-0.147956	-0.0469446
Actinomyces faecalis	-0.400692	-0.022352	-0.0302773	-0.0234826	-0.145402	-0.0322144	-0.0899766	-0.0234916	-0.0418359	-0.0339801	0.00874948	-0.023427	-0.0272716	-0.0215469	-0.0255606	-0.131389	-0.189073	0.0368369	-0.0653199	-0.0360621	-0.189142	-0.0301597	-0.136228	-0.115686	-0.0535082	-0.194686	-0.217991	-0.0959677	0.0354963	-0.108545	-0.147803	-0.0693318	-0.105132	-0.220488	-0.180651	-0.184303	-0.103735	-0.136559	-0.176547	-0.154996	0.784501	-0.140998	-0.139239	-0.0306633	-0.117132	-0.12997	-0.2038	-0.142611	-0.0685279
Schaalia meyeri	-0.393364	-0.0102756	-0.0321786	-0.0305656	-0.137711	-0.0274854	-0.0862207	-0.0270743	-0.0500319	-0.0319111	0.00991898	-0.0266581	-0.0284424	-0.0298761	-0.0259897	-0.0642226	-0.214424	-0.0266515	-0.0721724	-0.0454688	-0.181635	-0.0356848	-0.148119	-0.116546	-0.0609164	-0.176066	-0.197794	-0.102398	0.040053	-0.0755245	-0.122086	-0.0586438	-0.136295	-0.202852	-0.194336	-0.179846	-0.0872185	-0.136697	-0.180507	-0.147317	0.799684	-0.133506	-0.122625	0.00151579	-0.139537	-0.127603	-0.193874	-0.148894	-0.0230005
Schaalia sp. 19OD2882	-0.406827	-0.020778	-0.0343047	-0.0272969	-0.141545	-0.0305322	-0.0904879	-0.0278963	-0.0464517	-0.0357715	0.00726371	-0.0279436	-0.0312665	-0.0262985	-0.0295479	-0.117835	-0.207861	-0.0172916	-0.0675676	-0.0423008	-0.179008	-0.0320919	-0.145217	-0.11432	-0.0574351	-0.185156	-0.195375	-0.0992849	0.0392129	-0.0618763	-0.123919	-0.0577961	-0.126925	-0.202889	-0.190015	-0.175629	-0.0802889	-0.135306	-0.174587	-0.146826	0.790057	-0.132602	-0.125468	0.0167664	-0.1303	-0.13538	-0.200177	-0.137768	-0.0240884
Schaalia turicensis	-0.718439	-0.24406	0.0634069	0.0834985	-0.158491	0.0503243	-0.059762	0.0744573	0.0411426	0.06049	0.0929265	0.0742557	0.0710229	0.0783638	0.072543	-0.20309	-0.191519	0.618636	0.00916546	0.0571095	-0.33279	0.0650454	-0.209086	-0.112688	0.0148985	-0.324367	-0.347353	-0.24544	-0.12729	0.0213925	-0.216004	-0.244731	-0.137835	-0.338764	-0.337318	-0.330123	-0.212613	-0.215386	-0.335308	-0.270419	0.407528	-0.223896	-0.132204	0.118873	-0.149464	-0.131715	-0.382031	-0.113657	-0.00720056
Mobiluncus curtisii	-0.292014	-0.156937	-0.0285169	-0.0194385	-0.122406	-0.0452608	-0.0840528	-0.0229717	-0.038673	-0.0324485	-0.0290863	-0.0240785	-0.0225518	-0.0216192	-0.0229448	-0.0849524	-0.00112119	0.994542	0.0134146	-0.02789	-0.149193	-0.0252814	-0.108384	-0.0615667	-0.0431516	-0.120758	-0.148108	-0.122212	-0.101922	-0.0860761	-0.130566	-0.161342	-0.0652506	-0.133882	-0.140026	-0.159062	-0.13521	-0.121717	-0.156572	-0.120965	-0.0775561	-0.08935	-0.086178	-0.0142957	-0.0587544	0.0743353	-0.169281	-0.115013	-0.0711637
Curtobacterium flaccumfaciens	-0.121935	-0.0047176	-0.0136056	-0.00372441	-0.156178	-0.00646471	-0.0847469	-0.00603993	-0.0342208	-0.0244786	-0.0214479	-0.00741531	-0.0129536	0.00104419	-0.00865134	-0.166328	0.141236	0.0287307	-0.0574664	-0.0151691	-0.199116	-0.0442506	-0.15493	-0.111468	-0.0524308	0.265721	-0.225914	-0.205435	-0.196124	-0.110562	-0.113978	-0.112038	-0.0314274	-0.200487	-0.1232	-0.103951	-0.0688235	-0.117279	-0.0872828	-0.164024	0.321199	-0.135054	-0.129162	-0.11161	-0.101867	0.66261	-0.249367	0.0040976	-0.0484291
Bifidobacterium scardovii	-0.3157	-0.149374	0.0422204	-0.0139456	-0.0943956	0.0224945	-0.0346306	0.0321184	-0.045772	0.0601836	0.0477808	0.0387307	0.051033	-0.0193604	0.066398	0.531221	-0.126109	0.137221	-0.0920687	-0.0550883	-0.290078	-0.0412229	-0.197555	-0.132673	-0.0618516	-0.108839	-0.242176	-0.20849	-0.212147	-0.23446	-0.244676	-0.266252	-0.217161	-0.265229	-0.25239	-0.273889	-0.263485	-0.157722	-0.300353	-0.221808	-0.050454	-0.203466	-0.13363	-0.137952	-0.237763	-0.0130683	-0.205683	-0.254455	-0.153622
Bifidobacterium imperatoris	-0.394724	-0.181755	0.108537	0.117938	-0.0264642	0.0893203	0.0331115	0.1153	0.0946522	0.10314	0.106278	0.114003	0.115231	0.117764	0.113982	-0.103891	-0.0027195	0.985274	0.103561	0.108824	-0.168496	0.095807	-0.0901367	-0.00787284	0.0806015	-0.15856	-0.177836	-0.162055	-0.141489	0.0124223	-0.125899	-0.189546	-0.0731251	-0.175135	-0.187385	-0.172444	-0.158829	-0.120081	-0.194905	-0.162226	-0.103011	-0.103552	-0.122301	0.023761	-0.0633348	0.0395671	-0.219765	-0.110568	0.000467643
Bifidobacterium pullorum	-0.251137	0.0646397	0.996346	0.993642	0.826087	0.984502	0.933273	0.997968	0.983181	0.993572	0.9901	0.997872	0.996443	0.995723	0.995501	0.044085	-0.0265699	0.0585159	0.734869	0.976088	0.0502468	0.920507	0.350189	0.521223	0.945414	-0.0779447	-0.108767	-0.116427	-0.0650381	0.499266	-0.0302715	-0.0637842	0.022222	-0.0875296	-0.133442	0.0686901	-0.157834	0.169258	-0.0432671	-0.0774643	-0.0686825	0.119347	-0.0318866	-0.0401508	0.148577	-0.084649	-0.10778	0.118516	0.420056
Bifidobacterium lemurum	-0.676826	-0.35607	0.0238587	0.040391	-0.187654	0.00393489	-0.100835	0.0338505	0.0013977	0.0204347	0.027543	0.0335075	0.0325668	0.0379445	0.0324223	-0.186713	-0.106287	0.803519	-0.0139405	0.0287791	-0.331061	0.01338	-0.221195	-0.125083	-0.0246599	-0.30029	-0.296006	-0.249911	-0.238847	0.0743697	-0.162	-0.302	-0.0998295	-0.307074	-0.298816	-0.320836	-0.185491	-0.208431	-0.325159	-0.266621	-0.120953	-0.236677	-0.155968	0.214807	-0.148712	-0.082171	-0.361398	-0.0882206	-0.00270724
Bifidobacterium saguini	-0.781479	-0.430572	0.0182893	0.0270865	-0.227216	-0.0101541	-0.129928	0.0291509	-0.0085033	0.012407	0.018166	0.0297832	0.0257831	0.0343594	0.0272578	-0.223119	0.00523512	0.428781	-0.0650286	0.0283016	-0.397007	-0.0187199	-0.260788	-0.164456	-0.0396315	-0.367784	-0.296887	-0.24153	-0.307616	0.0600902	-0.149636	-0.364954	-0.124599	-0.372805	-0.286751	-0.360301	-0.119186	-0.21601	-0.334517	-0.313219	-0.15941	-0.295569	-0.269442	0.27	-0.175653	-0.18896	-0.383242	-0.12814	-0.0283461
Bifidobacterium thermophilum	-0.614036	-0.213466	0.683466	0.690179	0.425134	0.642518	0.551608	0.691713	0.662963	0.67123	0.67463	0.692151	0.685513	0.698301	0.686419	-0.151929	0.218461	0.121844	0.447082	0.676286	-0.194161	0.612756	0.0861746	0.255021	0.621307	-0.285871	-0.206013	-0.194269	-0.234065	0.217725	-0.116324	-0.278505	-0.0787844	-0.285584	-0.214294	-0.142762	-0.127429	0.0101353	-0.189633	-0.229475	-0.141465	-0.0805503	-0.169844	-0.0221092	0.0437198	-0.20943	-0.277227	-0.0347635	0.192015
Parascardovia denticolens	-0.554487	-0.280321	-0.0502443	-0.0292541	-0.21259	-0.0888078	-0.149502	-0.0438159	-0.0699704	-0.0567608	-0.0454032	-0.0418511	-0.0471701	-0.0409218	-0.0429379	-0.0993944	-0.14167	-0.0347306	-0.123477	-0.0663624	-0.286332	-0.0485003	-0.18321	-0.159507	-0.0786049	-0.27378	-0.190339	-0.156764	-0.174038	-0.249624	-0.200665	-0.243122	-0.13678	-0.280072	-0.208889	-0.246583	-0.164317	-0.116787	-0.255845	-0.21134	0.0409144	-0.196823	-0.0362196	-0.118134	-0.131415	-0.195717	-0.272236	-0.154048	-0.116285
Corynebacterium accolens	-0.25746	-0.11482	0.0327352	-0.0242956	-0.0886095	0.0201396	-0.0276214	0.0215406	-0.0535786	0.0524384	0.0395899	0.0280423	0.0409105	-0.0301817	0.0557036	0.546652	-0.144929	-0.00234845	-0.102342	-0.0608983	-0.247797	-0.050361	-0.175726	-0.128998	-0.0661929	-0.0832433	-0.207672	-0.182052	-0.181495	-0.205779	-0.20505	-0.216579	-0.191367	-0.227316	-0.224653	-0.233993	-0.234631	-0.137497	-0.264097	-0.191611	-0.0159303	-0.181934	-0.10522	-0.117273	-0.218336	-0.0129182	-0.164579	-0.220807	-0.118203
Corynebacterium jeikeium	-0.372256	-0.173334	-0.0328364	-0.0228841	-0.149365	-0.0512377	-0.100985	-0.0260892	-0.045619	-0.0374999	-0.027864	-0.0271042	-0.026422	-0.024345	-0.0263428	-0.106829	-0.0278157	0.979479	-0.000539266	-0.0346648	-0.186808	-0.0319064	-0.138493	-0.0836408	-0.0522832	-0.15913	-0.173272	-0.141392	-0.10751	-0.106952	-0.149552	-0.182311	-0.0975052	-0.175869	-0.170101	-0.192425	-0.138782	-0.144274	-0.187213	-0.15131	0.0304375	-0.115829	-0.114318	-0.0177372	-0.0851383	0.0448286	-0.205497	-0.147799	-0.0791112
Corynebacterium glucuronolyticum	-0.331495	-0.172555	-0.0309588	-0.0220085	-0.135236	-0.0487407	-0.0927956	-0.024942	-0.0427575	-0.0354643	-0.03117	-0.0260665	-0.0246774	-0.023352	-0.0251642	-0.0950907	-0.0102294	0.99208	0.00546316	-0.0297319	-0.165892	-0.0306976	-0.123156	-0.0734521	-0.0487948	-0.136103	-0.160451	-0.131421	-0.115687	-0.0842798	-0.134518	-0.173812	-0.0683486	-0.153149	-0.154085	-0.173167	-0.139925	-0.133737	-0.17346	-0.138182	-0.0680608	-0.107024	-0.105502	-0.00118101	-0.0700372	0.063097	-0.187747	-0.124054	-0.074229
Corynebacterium aurimucosum	-0.259427	-0.123683	0.0289996	-0.0238059	-0.0909108	0.0153825	-0.0316409	0.0184682	-0.0510142	0.0476946	0.0357207	0.0249051	0.0367283	-0.0306143	0.0514318	0.518699	-0.140908	-0.00551144	-0.091379	-0.0626311	-0.24775	-0.0433383	-0.164788	-0.113998	-0.0632157	-0.0961527	-0.197352	-0.170421	-0.172795	-0.203537	-0.209849	-0.216786	-0.194115	-0.219163	-0.209654	-0.230285	-0.223511	-0.118526	-0.252676	-0.178413	-0.0229855	-0.165749	-0.0933228	-0.127405	-0.215832	-0.0315574	-0.16124	-0.215893	-0.125213
Corynebacterium diphtheriae	-0.529373	-0.225972	0.0255969	0.0370284	-0.142789	0.001173	-0.0705323	0.0344144	0.00768637	0.0181668	0.0334867	0.0336919	0.0332422	0.0376504	0.0329906	-0.155369	-0.0123413	0.912401	0.0181576	0.0388603	-0.254671	0.0176204	-0.141295	-0.088325	-0.00333188	-0.236858	-0.275005	-0.163524	-0.146761	-0.0961086	-0.186736	-0.237803	-0.0621544	-0.246581	-0.2229	-0.254832	-0.191883	-0.162936	-0.244084	-0.20514	0.110804	-0.169832	-0.163855	0.00815078	-0.0784949	-0.0234719	-0.276434	-0.146191	-0.0699818
Mycobacterium marinum	-0.653456	-0.344176	0.164705	0.170653	-0.071811	0.123215	0.0326232	0.174441	0.140054	0.155465	0.162061	0.175768	0.169377	0.181531	0.172512	-0.212524	0.391189	0.0146706	0.0327753	0.18009	-0.342133	0.112561	-0.147606	-0.0487012	0.116002	-0.346232	-0.209467	-0.162547	-0.248247	-0.0363098	-0.168509	-0.306229	-0.127324	-0.353561	-0.17124	-0.269033	-0.0582365	-0.126493	-0.196003	-0.238926	-0.0581979	-0.201816	-0.238232	0.0947215	-0.0268425	-0.225481	-0.295656	-0.125047	-0.0434172
Mycobacterium gordo1e	-0.199025	0.0191789	0.0869888	0.100368	-0.0743137	0.084011	0.0117188	0.0970758	0.0626656	0.0771401	0.0799142	0.0947172	0.0923228	0.102935	0.0948635	-0.167166	-0.0241174	0.399112	0.0280022	0.0702796	-0.207679	0.0571064	-0.113697	-0.0701501	0.0488629	0.101723	-0.230477	-0.257939	-0.180957	-0.111924	-0.132418	-0.0824518	-0.0471755	-0.173624	-0.203139	-0.138251	-0.150692	-0.13782	-0.132498	-0.217381	0.145876	-0.130849	-0.126152	-0.124298	-0.0904272	0.435231	-0.243509	0.0324384	-0.0236923
Mycolicibacterium phocaicum	-0.479939	-0.29046	-0.0449124	-0.0422667	-0.190429	-0.0913347	-0.140218	-0.0388103	-0.0635788	-0.0583736	-0.052749	-0.0368529	-0.0439624	-0.0353596	-0.0400434	-0.154185	0.0886755	-0.0346757	-0.114649	-0.0450973	-0.261737	-0.066192	-0.160162	-0.14679	-0.077188	-0.248743	-0.11149	-0.0704072	-0.231347	-0.297328	-0.111389	-0.288652	-0.0434225	-0.256025	-0.0751177	-0.196308	0.00956128	-0.0995437	-0.144714	-0.194752	-0.127404	-0.19742	-0.162999	-0.0949486	-0.0325313	-0.183265	-0.178821	-0.107625	-0.233747
Arachnia rubra	-0.260041	0.0312222	-0.0466107	-0.0440638	-0.12061	-0.0517216	-0.0756518	-0.0398817	-0.0409347	-0.0491609	-0.0140847	-0.0404531	-0.0453158	-0.03877	-0.0450332	-0.125779	-0.182879	-0.033958	-0.0821727	-0.0443281	-0.156664	-0.0626783	-0.0561908	-0.0382007	-0.0351282	-0.189426	-0.144054	0.0391478	0.27358	-0.111039	-0.157912	-0.0415111	-0.121844	-0.155342	-0.0320113	-0.164345	0.039465	-0.0610449	-0.0808541	-0.133678	0.759778	-0.0639097	-0.0609328	-0.042428	-0.0221405	-0.149278	-0.049906	-0.105075	-0.0107752
Propionibacterium acidifaciens	-0.407529	-0.0226938	-0.0318007	-0.0241475	-0.140217	-0.0336541	-0.0887373	-0.0253632	-0.0443822	-0.035366	0.00766678	-0.0252514	-0.0286085	-0.023573	-0.0270896	-0.115595	-0.192973	-0.0172943	-0.0682457	-0.0360298	-0.181121	-0.0296275	-0.135776	-0.114838	-0.0530044	-0.189354	-0.195951	-0.0893071	0.0340113	-0.120075	-0.127768	-0.0668979	-0.11692	-0.204856	-0.18047	-0.174065	-0.0876798	-0.125483	-0.171069	-0.14558	0.787634	-0.131496	-0.119031	-0.0417639	-0.116455	-0.138856	-0.19541	-0.151292	-0.0432152
Amycolatopsis sp. Hca4	-0.24475	0.0713436	0.997442	0.985986	0.824221	0.98501	0.933841	0.997274	0.974773	0.996734	0.991918	0.997895	0.998171	0.988552	0.998843	0.114633	-0.0206676	0.0524376	0.724224	0.966836	0.0386993	0.91153	0.338275	0.510971	0.936231	-0.0711326	-0.117737	-0.123635	-0.0757737	0.465833	-0.0411263	-0.0767161	0.00936386	-0.0987602	-0.141413	0.0578141	-0.168788	0.159173	-0.0547199	-0.086855	-0.0601382	0.108566	-0.042603	-0.0649295	0.136849	-0.0765342	-0.106101	0.097823	0.397491
Thermus brockianus	-0.118155	-0.131243	0.0199387	0.0277073	-0.127584	-0.00135916	-0.0624533	0.0267334	0.000473951	0.011642	0.00737109	0.0260639	0.0218113	0.0339337	0.0253644	-0.174054	0.333295	0.0557126	-0.0409997	0.0135768	-0.229989	-0.0143479	-0.120319	-0.0845525	-0.0149654	-0.0564064	-0.225027	-0.197411	-0.184578	-0.148956	-0.18515	-0.174038	-0.108349	-0.162547	-0.127112	-0.171242	-0.0983679	-0.103559	-0.112083	-0.156501	-0.0465194	-0.126305	-0.149313	-0.0920251	-0.0246566	0.29586	-0.21211	0.025543	-0.0740894
Bacteroides sp. HF-162	-0.375689	-0.244567	-0.0378985	-0.0368173	-0.163018	-0.0758041	-0.115521	-0.0331396	-0.0506402	-0.0473197	-0.046762	-0.0314755	-0.0379701	-0.0298201	-0.0344698	-0.134358	-0.0588812	-0.0453182	-0.0804979	-0.0105361	-0.226993	-0.05497	-0.0618606	-0.0999503	-0.0444537	-0.214165	-0.130947	0.0166742	-0.168628	-0.244935	-0.157853	-0.230362	0.0570802	-0.212244	0.00128189	-0.160883	-0.0303927	-0.0265034	-0.0608687	-0.121033	-0.0804849	-0.144585	-0.18952	-0.051307	0.00825153	-0.144006	-0.124454	-0.0613581	-0.213042
Bacteroides sp. CACC 737	-0.373594	-0.262065	-0.0442113	-0.0445184	-0.164723	-0.0793944	-0.122917	-0.0399077	-0.0536952	-0.055668	-0.0540778	-0.0379822	-0.0449664	-0.036441	-0.0407321	-0.137003	-0.0490468	-0.0428261	-0.0674192	-0.02818	-0.215054	-0.051594	-0.0764518	-0.0872078	-0.0557341	-0.219995	-0.103801	0.0202291	-0.184102	-0.251952	-0.133307	-0.250237	0.01182	-0.205222	0.00544951	-0.155252	0.0109008	-0.0182138	-0.0557859	-0.117526	-0.104286	-0.121858	-0.18699	-0.0661105	-0.0228562	-0.150886	-0.122133	-0.0697626	-0.220072
Bacteroides sp. KGMB07931	0.0103408	-0.0611721	0.056962	0.0460638	0.0633127	0.0798944	0.0624254	0.0511089	0.042017	0.0456218	0.0438118	0.0494204	0.0469986	0.0563075	0.0465439	-0.0311371	0.00359813	0.0154258	0.0149786	0.0524764	0.16506	0.0330595	-0.0500973	-0.0387604	0.030016	-0.0124673	-0.0534059	-0.0658398	-0.059362	-0.0487315	-0.0111058	-0.0478288	-0.0721691	-0.119152	-0.0989195	0.0536871	-0.0839149	-0.0681054	-0.00158556	-0.10708	-0.00790957	0.00587411	-0.0553267	-0.0662406	-0.0619392	0.0205391	-0.0520556	-0.0245689	0.124264
Phocaeicola coprophilus	-0.197337	-0.227156	-0.0486413	-0.0364738	-0.221346	-0.087604	-0.145199	-0.0420913	-0.0561967	-0.0503411	-0.0488272	-0.0414591	-0.0504577	-0.0332033	-0.0463283	-0.180239	-0.168975	-0.0587303	-0.101289	-0.0209774	-0.262152	-0.0552195	-0.168557	-0.131037	-0.0471933	-0.287441	-0.134703	0.0846368	-0.108394	-0.255319	-0.204732	-0.252439	-0.197975	-0.172878	-0.0127594	-0.244482	0.0112673	-0.0542712	-0.0140795	0.0865581	0.126553	-0.0491628	-0.213456	0.25072	-0.160838	-0.174573	-0.169827	-0.21699	-0.184062
Parabacteroides sp. CT06	-0.428231	-0.249171	-0.0413479	-0.040605	-0.180929	-0.0837361	-0.12943	-0.0356245	-0.0595512	-0.0527626	-0.0467215	-0.0341557	-0.04087	-0.0320602	-0.0379504	-0.147069	-0.0879758	-0.0488064	-0.111507	-0.0207785	-0.247416	-0.0691168	-0.107764	-0.144264	-0.0583547	-0.234409	-0.155063	-0.0274455	-0.186389	-0.284977	-0.15421	-0.255109	0.0265855	-0.234479	-0.0490552	-0.18669	-0.041747	-0.0692563	-0.11357	-0.168323	-0.0068233	-0.193034	-0.22182	-0.0763171	-0.0247963	-0.15964	-0.161095	-0.10778	-0.221764
Tannerella forsythia	-0.459083	-0.0149856	0.247656	0.196813	0.0603034	0.247141	0.161783	0.243402	0.169961	0.259523	0.286615	0.248073	0.255612	0.202554	0.266962	0.330035	-0.204581	-0.00686208	0.0600026	0.172232	-0.257802	0.162516	-0.142695	-0.046768	0.135561	-0.179854	-0.313724	-0.171274	-0.0957427	-0.0664005	-0.180736	-0.196433	-0.173564	-0.306691	-0.29333	-0.255296	-0.190289	-0.17591	-0.276675	-0.223744	0.67695	-0.185393	-0.209756	0.000402452	-0.169996	-0.109386	-0.236159	-0.181711	-0.0389653
Barnesiella viscericola	-0.349708	-0.299192	-0.0427745	-0.0358882	-0.220828	-0.0888381	-0.151838	-0.0362485	-0.054176	-0.0495149	-0.0517205	-0.034946	-0.044177	-0.029322	-0.0395916	-0.180178	-0.136185	-0.0564993	-0.098809	-0.0130666	-0.297013	-0.0546167	-0.139081	-0.135082	-0.0470284	-0.295835	-0.177779	0.0379754	-0.195772	-0.262576	-0.196575	-0.314682	-0.0752018	-0.207597	-0.0273733	-0.249108	-0.0113956	-0.0363774	-0.0757965	-0.0385847	-0.0757204	-0.128244	-0.241448	0.115607	-0.119023	-0.190283	-0.185883	-0.161492	-0.218785
Prevotella dentalis	-0.118193	-0.038763	0.481711	0.475476	0.415268	0.496361	0.457786	0.478225	0.471253	0.469566	0.467843	0.476869	0.473232	0.48406	0.472576	-0.0361327	-9.6949e-05	0.0282614	0.361746	0.474522	0.161785	0.447694	0.141125	0.224853	0.446629	-0.057726	-0.0960989	-0.0714423	-0.0777617	0.183645	-0.0280852	-0.0702027	-0.0224839	-0.119145	-0.119341	0.0791643	-0.124991	0.0529443	-0.00291696	-0.104225	-0.0459553	0.0843537	-0.0479323	-0.0861035	0.0229351	-0.0381051	-0.0831532	0.0524741	0.279829
Prevotella multiformis	-0.116515	-0.03624	0.448707	0.440712	0.387487	0.463444	0.428814	0.445228	0.431921	0.43604	0.434226	0.44334	0.440185	0.451216	0.438376	-0.0360488	0.00266278	0.0853161	0.306028	0.436967	0.177127	0.398037	0.0858736	0.166074	0.40486	-0.0480141	-0.0850081	-0.11481	-0.0890257	0.158412	0.00145252	-0.0664917	-0.0535281	-0.148008	-0.15895	0.0777247	-0.127631	-0.00770741	-0.0367914	-0.141875	-0.0394339	0.0422315	-0.0563487	-0.0787638	0.00285837	-0.0233194	-0.0975064	0.0149256	0.29434
Prevotella denticola	-0.120596	-0.0617152	0.405241	0.40171	0.334699	0.419689	0.378378	0.401665	0.388015	0.394187	0.390873	0.399833	0.395717	0.408859	0.39454	-0.0509487	-0.0560276	0.0222432	0.263744	0.398504	0.142988	0.363463	0.0526433	0.137099	0.365203	-0.0738274	-0.090132	-0.130569	-0.0876799	0.123894	-0.0211545	-0.0914482	-0.0805702	-0.157479	-0.158181	0.0527476	-0.133189	0.00116128	-0.034765	-0.136017	-0.0391463	0.0367224	-0.0364393	-0.0757523	-0.0209993	-0.0392527	-0.113273	0.0210971	0.277415
Escherichia sp. E4742	-0.196345	-0.0108756	-0.0429076	-0.0425699	-0.0195994	-0.0460144	-0.0579539	-0.0412519	-0.0554864	-0.0482945	-0.0197103	-0.0410516	-0.0402652	-0.0354317	-0.0446353	-0.0582608	-0.104852	-0.0507269	-0.0827465	-0.0532583	0.0849305	-0.0580734	-0.128829	-0.0970594	-0.0710752	-0.0651981	-0.101238	-0.117405	-0.0216501	-0.117294	-0.0122552	-0.0107596	-0.101315	-0.073828	-0.162494	-0.0900542	-0.130071	-0.10792	-0.140171	-0.125112	0.454808	-0.14108	-0.166163	-0.0974055	-0.124748	-0.159026	-0.164466	-0.15316	-0.123653
Citrobacter portucalensis	-0.0991911	-0.100278	-0.0329245	-0.0225117	-0.0962809	-0.0471148	-0.0813452	-0.0301592	-0.0450338	-0.029462	-0.0218913	-0.0310593	-0.0347738	-0.0205007	-0.0353544	-0.105252	-0.153461	-0.0308964	-0.0653643	-0.00258498	-0.0921891	-0.0296621	-0.108781	-0.0917621	-0.0205891	-0.157151	-0.11503	-0.103706	-0.00982262	-0.112642	-0.122771	-0.107046	-0.141804	-0.0648524	-0.0688275	-0.147011	-0.0680873	-0.00102996	-0.0379028	-0.0256415	0.245928	-0.0778224	-0.150752	-0.0568052	-0.149022	-0.143777	-0.158552	-0.178312	-0.0702976
Citrobacter werkmanii	-0.293996	-0.0920377	-0.0266672	-0.0253708	-0.0386138	-0.0352246	-0.0629868	-0.0237102	-0.0446353	-0.0335907	-0.00840183	-0.0234011	-0.0217319	-0.0162091	-0.0278275	-0.0859932	-0.112511	-0.0604839	-0.0915156	-0.0196423	0.0323561	-0.0500675	-0.138581	-0.123782	-0.0630987	-0.118055	-0.158363	-0.150366	-0.0861498	-0.0769301	-0.00963327	-0.0669849	-0.0723682	-0.111834	-0.196251	-0.138474	-0.156928	-0.123931	-0.181905	-0.163384	0.349486	-0.192995	-0.218305	-0.0354395	-0.146261	-0.20095	-0.217794	-0.153987	-0.102029
Citrobacter sp. R56	-0.243147	-0.0458624	-0.0465616	-0.0438303	-0.0472262	-0.0557999	-0.0758066	-0.0439703	-0.0633448	-0.0533904	-0.0237526	-0.0438333	-0.0435887	-0.0379465	-0.0473224	-0.0798355	-0.112883	0.0495965	-0.0895316	-0.0579493	0.0441142	-0.0595565	-0.143993	-0.120802	-0.0816842	-0.0908448	-0.145276	-0.148655	-0.0525928	-0.136769	-0.0414004	-0.0515364	-0.101972	-0.102257	-0.192991	-0.12239	-0.156439	-0.139056	-0.174168	-0.153462	0.41836	-0.170291	-0.169264	-0.106768	-0.129975	-0.145875	-0.206244	-0.148912	-0.151106
Citrobacter sp. RHB25-C09	-0.272965	-0.039159	0.145229	0.147144	0.107671	0.132232	0.102302	0.148317	0.127222	0.136526	0.164265	0.148479	0.147702	0.155353	0.143587	-0.0883726	-0.118314	-0.0477904	0.0441814	0.134652	0.0466609	0.112106	-0.0648188	-0.0221668	0.102515	-0.104308	-0.160614	-0.155327	-0.0704421	-0.0562432	-0.0525619	-0.0669684	-0.0893743	-0.123375	-0.194134	-0.10134	-0.169708	-0.0906672	-0.162261	-0.163663	0.409645	-0.146236	-0.199423	-0.122585	-0.0891235	-0.137924	-0.216289	-0.114631	-0.0699108
Citrobacter farmeri	-0.257203	-0.0349043	0.0130971	0.0143116	0.00249131	0.00324153	-0.019868	0.0156752	-0.00378486	0.00624451	0.0359727	0.0158869	0.0149277	0.0214884	0.011922	-0.0790531	-0.121023	-0.0372493	-0.0506648	0.00018702	0.0433504	-0.00715857	-0.124111	-0.0899017	-0.0238846	-0.0974667	-0.139031	-0.145392	-0.0544039	-0.0985685	-0.0304683	-0.052489	-0.107406	-0.107681	-0.191662	-0.11321	-0.14266	-0.125101	-0.169034	-0.155632	0.423342	-0.162797	-0.176282	-0.0958231	-0.127004	-0.174264	-0.204811	-0.144528	-0.12298
Citrobacter amalo1ticus	-0.285093	-0.0857434	-0.0406826	-0.0409583	-0.0572869	-0.0554689	-0.0810825	-0.0381039	-0.0594473	-0.0480537	-0.0232368	-0.0376783	-0.0393997	-0.0322765	-0.0416321	-0.0891849	-0.127364	-0.0473259	-0.101095	-0.0464922	0.0156384	-0.0656123	-0.141617	-0.130647	-0.0755446	-0.116456	-0.168195	-0.137049	-0.0935329	-0.128	-0.0578407	-0.0863215	-0.0781387	-0.126282	-0.189446	-0.139988	-0.163164	-0.139186	-0.183351	-0.172886	0.31954	-0.198585	-0.212728	-0.0678349	-0.134881	-0.186791	-0.219632	-0.148276	-0.167013
Citrobacter koseri	-0.227192	-0.0225463	-0.0466137	-0.0465074	-0.0455094	-0.0544054	-0.0728868	-0.0442799	-0.0621833	-0.0531281	-0.0216021	-0.0441056	-0.0449396	-0.0390396	-0.0476457	-0.0729447	-0.123958	-0.0505558	-0.0920753	-0.062985	0.0392487	-0.0627133	-0.15052	-0.117115	-0.0803029	-0.0903034	-0.0982956	-0.133947	-0.0353105	-0.135085	-0.0100222	-0.041081	-0.142764	-0.0987132	-0.172151	-0.107576	-0.0959801	-0.130232	-0.153002	-0.141611	0.46905	-0.154757	-0.167212	-0.105839	-0.144509	-0.167091	-0.182849	-0.169	-0.13624
Klebsiella aerogenes	-0.360288	-0.0909658	0.098	0.108028	0.00220295	0.0837826	0.0275391	0.103213	0.0794847	0.0941952	0.123522	0.103035	0.0990612	0.111989	0.0974174	-0.140255	-0.195843	-0.0280679	0.00706668	0.103264	-0.0863472	0.0832131	-0.115382	-0.0651201	0.0693593	-0.208858	-0.205696	-0.175922	-0.0470428	-0.0699507	-0.112822	-0.120182	-0.154858	-0.165857	-0.205849	-0.186082	-0.153166	-0.0880946	-0.173441	-0.147213	0.496852	-0.15246	-0.181741	-0.0748743	-0.139484	-0.222078	-0.263199	-0.145849	-0.0610103
Klebsiella michiganensis	-0.317723	-0.0796061	-0.0525234	-0.043814	-0.150747	-0.0663897	-0.118634	-0.0465015	-0.0683136	-0.05492	-0.0244528	-0.0465073	-0.0506909	-0.0385548	-0.0514285	-0.150315	-0.19119	-0.0564371	-0.107405	-0.0406292	-0.137961	-0.0553759	-0.179539	-0.152342	-0.072663	-0.223969	-0.188412	-0.106685	-0.0234751	-0.184657	-0.126406	-0.117304	-0.166239	-0.186792	-0.170178	-0.213436	-0.0974962	-0.114737	-0.151448	-0.108286	0.595939	-0.152891	-0.213584	-0.0151414	-0.185926	-0.209048	-0.232699	-0.208817	-0.129549
Klebsiella huaxiensis	-0.356923	-0.118763	-0.0539699	-0.0495358	-0.0972707	-0.0539226	-0.105333	-0.0496744	-0.0724136	-0.0549249	-0.0277695	-0.0494838	-0.0494618	-0.0423681	-0.0533521	-0.112192	-0.20082	-0.0607996	-0.113159	-0.0595113	-0.0338254	-0.0711815	-0.193255	-0.149599	-0.0936106	-0.154572	-0.176831	-0.190782	-0.0767617	0.00973926	-0.0496442	-0.078805	-0.135858	-0.153841	-0.23122	-0.183386	-0.14316	-0.154421	-0.208801	-0.182271	0.403912	-0.208786	-0.233788	0.0821295	-0.206	-0.207153	-0.258461	-0.149386	-0.0774524
Klebsiella quasivariicola	-0.240153	-0.0258116	-0.0395426	-0.0303364	-0.137896	-0.0451989	-0.0950108	-0.0343222	-0.050956	-0.0381241	-0.00804356	-0.0349295	-0.0398823	-0.0283432	-0.0384759	-0.130534	-0.200373	-0.0476391	-0.0688216	-0.0245348	-0.164433	-0.0324635	-0.128014	-0.108552	-0.0401764	-0.191007	-0.163588	-0.0923338	0.0516487	-0.130476	-0.145869	-0.0715287	-0.156967	-0.15147	-0.118618	-0.178512	-0.0595694	-0.0662418	-0.0932854	-0.0750405	0.661968	-0.096777	-0.145871	-0.0575988	-0.145139	-0.144253	-0.1784	-0.173722	-0.0645056
Raoultella ornithinolytica	-0.343808	-0.0868546	-0.0171655	-0.0147492	-0.0544974	-0.0198782	-0.0641849	-0.0133199	-0.0355276	-0.0210939	0.00893593	-0.0131872	-0.0135233	-0.00685961	-0.017141	-0.103854	-0.171879	-0.0435429	-0.0824005	-0.0239781	-0.011567	-0.0390606	-0.166231	-0.125084	-0.0584912	-0.143514	-0.180213	-0.178047	-0.070969	-0.0113574	-0.0383302	-0.0707075	-0.125947	-0.146294	-0.234158	-0.167709	-0.152025	-0.154993	-0.211206	-0.183823	0.439436	-0.200079	-0.214955	0.0304338	-0.179768	-0.202608	-0.25155	-0.148294	-0.0776133
Enterobacter cloacae	-0.353046	-0.0807975	0.0985658	0.10261	0.0551847	0.0892254	0.0487772	0.102199	0.0794423	0.0922386	0.120313	0.10247	0.101879	0.109139	0.0978042	-0.0944188	-0.158681	-0.0328655	0.0028378	0.0886852	0.0205708	0.0709059	-0.11547	-0.0596293	0.0529665	-0.137529	-0.178917	-0.184351	-0.0888063	-0.00601429	-0.0366731	-0.0809038	-0.106473	-0.142389	-0.238629	-0.142023	-0.179974	-0.12437	-0.209165	-0.188043	0.37619	-0.181031	-0.191244	-0.0349176	-0.139039	-0.208316	-0.253773	-0.128659	-0.0565035
Enterobacter roggenkampii	-0.22868	-0.0257495	-0.0407211	-0.0403711	-0.03928	-0.0481187	-0.067045	-0.0383351	-0.0565171	-0.0471896	-0.0164627	-0.0381771	-0.0383862	-0.0325711	-0.0417226	-0.0751966	-0.085744	-0.0518352	-0.0881116	-0.0506595	0.0456838	-0.0573223	-0.13658	-0.114365	-0.0737451	-0.0881199	-0.134085	-0.132902	-0.0379307	-0.124536	-0.0309324	-0.036809	-0.107369	-0.0968062	-0.179628	-0.111397	-0.134123	-0.129343	-0.159448	-0.144001	0.46373	-0.161231	-0.182008	-0.0979332	-0.132104	-0.162251	-0.190698	-0.158296	-0.136075
Enterobacter sp. SA187	-0.271359	-0.032185	-0.0399124	-0.0390621	-0.0529695	-0.0473006	-0.0723808	-0.0369141	-0.0564075	-0.0466253	-0.0134476	-0.0367143	-0.0373887	-0.0314924	-0.0403921	-0.0833646	-0.132751	-0.0481528	-0.0903827	-0.0486934	0.0180784	-0.0566666	-0.145479	-0.121366	-0.0739284	-0.106849	-0.141608	-0.13387	-0.0383318	-0.126916	-0.0315743	-0.0476758	-0.115046	-0.117912	-0.187643	-0.125412	-0.127217	-0.135276	-0.169808	-0.154236	0.50989	-0.168618	-0.185019	-0.0889497	-0.141329	-0.173644	-0.200596	-0.165157	-0.127233
Enterobacter sp. JUb54	-0.241469	-0.00825259	-0.0263996	-0.0251988	-0.0318377	-0.0310292	-0.0526746	-0.0235467	-0.0413223	-0.0323353	0.00174928	-0.0234753	-0.0234519	-0.0180732	-0.0268716	-0.0763747	-0.0945971	-0.0410845	-0.0728625	-0.0373285	0.0360891	-0.0400294	-0.131741	-0.104113	-0.0590765	-0.0915699	-0.133453	-0.131035	-0.0168883	-0.112728	-0.0325188	-0.0255801	-0.113675	-0.101358	-0.181816	-0.109545	-0.126664	-0.126366	-0.157131	-0.140323	0.540339	-0.149975	-0.174424	-0.0967137	-0.130175	-0.159608	-0.18717	-0.159913	-0.115617
Shigella flexneri	-0.102114	-0.0169643	-0.036567	-0.037163	0.0278086	-0.0396018	-0.0345952	-0.0365323	-0.048732	-0.0419473	-0.0235358	-0.0362912	-0.0323544	-0.0298084	-0.0396286	-0.022663	-0.058421	-0.0475907	-0.0756749	-0.0484611	0.167468	-0.0526753	-0.10172	-0.0845227	-0.0682441	-0.00692166	-0.0496075	-0.128014	-0.049284	-0.0801351	0.040183	0.0142073	-0.068445	-0.015795	-0.1406	-0.0411755	-0.132366	-0.0899929	-0.11576	-0.106039	0.22652	-0.129579	-0.160491	-0.0980073	-0.116616	-0.137977	-0.132973	-0.125486	-0.121713
Shigella boydii	-0.0416694	-0.0149118	-0.0341972	-0.0356508	0.0435705	-0.038345	-0.0260534	-0.0352873	-0.0450458	-0.0391613	-0.0265034	-0.0351687	-0.0316585	-0.0288903	-0.0382594	-0.00809064	-0.0391647	-0.0421112	-0.0685396	-0.0464809	0.188714	-0.0514594	-0.0870415	-0.0705883	-0.0613767	0.0133909	-0.0317783	-0.11955	-0.0548998	-0.067505	0.048652	0.0160564	-0.066555	0.013422	-0.125562	-0.0262759	-0.128797	-0.0778494	-0.100894	-0.0873213	0.120542	-0.115147	-0.133122	-0.0983455	-0.108207	-0.123469	-0.118165	-0.113675	-0.119655
Shigella dysenteriae	-0.0958015	0.000926411	0.26348	0.259631	0.294109	0.263938	0.257131	0.261493	0.247096	0.253884	0.265502	0.260861	0.262296	0.269628	0.255719	-0.0179115	-0.0362328	-0.0161706	0.149237	0.244809	0.249451	0.221661	0.00244561	0.0692934	0.216799	-0.00351568	-0.0742229	-0.163351	-0.0800817	0.0589462	0.0400158	-0.00617739	-0.0785479	-0.0462335	-0.183499	0.0232738	-0.185847	-0.0490533	-0.102743	-0.134894	0.10609	-0.0650123	-0.146495	-0.132257	-0.0750936	-0.122755	-0.150818	-0.0749458	0.0498827
Shigella sonnei	-0.0435711	-0.00998725	-0.0374438	-0.0385092	0.0483957	-0.0377467	-0.0244765	-0.0385522	-0.0467674	-0.0420079	-0.0289769	-0.0383991	-0.0338415	-0.031703	-0.0416018	-0.00481857	-0.0360486	-0.0464355	-0.0689803	-0.0488894	0.205844	-0.0536855	-0.0891864	-0.0656903	-0.063504	0.0232544	-0.0192412	-0.115125	-0.0450783	-0.0651113	0.0568983	0.0311824	-0.0623186	0.0163886	-0.121345	-0.0189242	-0.127826	-0.0686933	-0.0939198	-0.0829262	0.152354	-0.108157	-0.134151	-0.0956891	-0.106272	-0.119341	-0.108856	-0.115264	-0.108524
Salmonella bongori	-0.155801	-0.0400005	-0.0347401	-0.0350663	-0.0139561	-0.0473212	-0.0568991	-0.0340296	-0.0506358	-0.0409518	-0.0200754	-0.0338624	-0.0353213	-0.0286053	-0.0372814	-0.0531448	-0.0946168	-0.0444064	-0.0827768	-0.0508346	0.0793066	-0.0553081	-0.131191	-0.101804	-0.0663358	-0.0633864	-0.104953	-0.141663	-0.0710775	-0.113749	-0.0112874	-0.0502993	-0.124371	-0.0615029	-0.172407	-0.0967615	-0.136198	-0.122709	-0.154953	-0.132929	0.248305	-0.154991	-0.147166	-0.106125	-0.137816	-0.15576	-0.186584	-0.145455	-0.147708
Kosakonia sacchari	-0.280108	-0.04517	-0.00517635	-0.00370359	-0.0205233	-0.016091	-0.0403943	-0.00225487	-0.0225061	-0.0124087	0.0179911	-0.00204554	-0.00264624	0.00358749	-0.00584721	-0.081011	-0.12484	-0.000865499	-0.0640911	-0.0155369	0.0310928	-0.0251264	-0.130111	-0.103697	-0.0407629	-0.107262	-0.150685	-0.142745	-0.0560011	-0.121694	-0.0469522	-0.0584157	-0.103572	-0.1191	-0.195155	-0.123179	-0.155777	-0.130071	-0.176707	-0.162204	0.441285	-0.170573	-0.192489	-0.103342	-0.133017	-0.174982	-0.210615	-0.16316	-0.132482
Kosakonia arachidis	-0.259431	-0.0296516	-0.0388906	-0.0382771	-0.040198	-0.0457277	-0.0667386	-0.0359803	-0.0548927	-0.045413	-0.0134978	-0.0356278	-0.0353372	-0.0302293	-0.0393137	-0.0763119	-0.117491	-0.0529646	-0.0891862	-0.0519412	0.0420735	-0.0553218	-0.1455	-0.117538	-0.0754708	-0.0894523	-0.115625	-0.136286	-0.0418272	-0.128249	-0.0171577	-0.0365305	-0.111198	-0.109774	-0.176497	-0.10827	-0.117533	-0.12931	-0.158813	-0.152167	0.477424	-0.164286	-0.195292	-0.0954616	-0.137779	-0.169379	-0.186682	-0.160593	-0.13746
Kosakonia cowanii	-0.319963	-0.0712573	-0.0431513	-0.0407413	-0.0682252	-0.0436799	-0.0835466	-0.039503	-0.0607496	-0.0472915	-0.0159324	-0.0393582	-0.0390006	-0.033428	-0.0430604	-0.0966778	-0.171885	-0.0499421	-0.0992223	-0.0486645	-0.00185281	-0.0614675	-0.16962	-0.133718	-0.0836572	-0.124069	-0.171623	-0.170631	-0.0608864	-0.0248919	-0.019579	-0.057108	-0.11862	-0.130925	-0.227075	-0.157612	-0.142687	-0.155747	-0.20483	-0.174508	0.46763	-0.195501	-0.197673	0.0227459	-0.174165	-0.18249	-0.238688	-0.141086	-0.0790114
Leclercia adecarboxylata	-0.392009	-0.121725	-0.00514634	-0.00181277	-0.0517228	-0.0156776	-0.0597972	-0.000964275	-0.0259465	-0.0122803	0.0167933	-0.000496346	-0.000676617	0.00599581	-0.00493992	-0.107478	-0.164492	-0.0451002	-0.0846899	-0.0093557	-0.0216539	-0.0314379	-0.169821	-0.131276	-0.0509566	-0.158674	-0.183211	-0.184292	-0.108481	-0.0614514	-0.0313574	-0.104021	-0.118188	-0.165046	-0.240286	-0.176366	-0.160745	-0.154239	-0.227441	-0.204046	0.385795	-0.218461	-0.217438	-0.0142417	-0.171675	-0.216256	-0.266095	-0.160001	-0.094252
Kluyvera intermedia	-0.248345	-0.012785	0.103411	0.104297	0.0860715	0.0945398	0.0707987	0.105934	0.0873461	0.0964553	0.125592	0.10592	0.105302	0.112012	0.101675	-0.0721967	-0.105116	-0.0311774	0.0219392	0.0921098	0.0634449	0.0771746	-0.0779706	-0.0340046	0.0660076	-0.0929463	-0.143822	-0.145379	-0.0448557	-0.0426861	-0.0298834	-0.0402395	-0.0980373	-0.0977817	-0.194456	-0.0947024	-0.157476	-0.100411	-0.160238	-0.148311	0.429523	-0.138741	-0.177193	-0.0994157	-0.107625	-0.172507	-0.20139	-0.134219	-0.0713049
[Enterobacter] lignolyticus	-0.342996	-0.0927329	-0.0454314	-0.0450046	-0.0809859	-0.0540219	-0.0933594	-0.0416785	-0.0645084	-0.0514394	-0.0216952	-0.0413684	-0.0426466	-0.0357934	-0.0453499	-0.107749	-0.146871	-0.0445241	-0.106065	-0.0476829	-0.0220265	-0.0692394	-0.164983	-0.141731	-0.0840923	-0.142869	-0.191004	-0.153183	-0.0838931	-0.0748456	-0.0493959	-0.0880164	-0.0960263	-0.149233	-0.215059	-0.167984	-0.151597	-0.157367	-0.205093	-0.185592	0.420191	-0.210897	-0.225417	-0.00144596	-0.157577	-0.198514	-0.242227	-0.150299	-0.126352
Jejubacter calystegiae	-0.314777	-0.035514	-0.0306823	-0.0285331	-0.0640492	-0.0388665	-0.0711913	-0.026776	-0.0474196	-0.0374746	-0.00186677	-0.02648	-0.0277604	-0.0214832	-0.0303264	-0.100618	-0.146191	-0.0310565	-0.0841453	-0.0387314	-0.0159631	-0.0453147	-0.144935	-0.123211	-0.0662544	-0.131124	-0.167729	-0.134946	-0.0343684	-0.133335	-0.0582407	-0.0546472	-0.106174	-0.149274	-0.1963	-0.146723	-0.137612	-0.143962	-0.182007	-0.166279	0.560275	-0.176759	-0.190127	-0.0867105	-0.134693	-0.177963	-0.213695	-0.154878	-0.133906
Pseudocitrobacter sp. G163CM	-0.198896	-0.0069015	0.170184	0.170367	0.175381	0.161547	0.148116	0.171532	0.155073	0.162699	0.185223	0.171567	0.17272	0.178517	0.166961	-0.0467269	-0.0731796	-0.0391055	0.074237	0.156928	0.135249	0.139017	-0.0367826	0.0129698	0.129828	-0.0570465	-0.106853	-0.148238	-0.0586746	-0.00400635	0.00262128	-0.0208649	-0.0736729	-0.0654581	-0.180041	-0.0492956	-0.167682	-0.0689425	-0.137443	-0.136404	0.295718	-0.114828	-0.173121	-0.117258	-0.0856167	-0.169139	-0.176807	-0.112036	-0.0440862
Yokenella regensburgei	-0.282171	-0.0680279	-0.035659	-0.0344472	-0.0515051	-0.0484919	-0.0736956	-0.032651	-0.0541888	-0.0435547	-0.0151532	-0.03265	-0.0330273	-0.0265518	-0.0363018	-0.0889648	-0.106228	0.0967981	-0.0841867	-0.0445415	0.0227647	-0.0564749	-0.151315	-0.123953	-0.0719459	-0.110673	-0.157806	-0.154326	-0.0758845	-0.135171	-0.0488978	-0.0770829	-0.111392	-0.121393	-0.203789	-0.138944	-0.160781	-0.147944	-0.189511	-0.170833	0.386428	-0.185144	-0.199981	-0.0967836	-0.143138	-0.157775	-0.225101	-0.174016	-0.151261
Atlantibacter hermannii	-0.485984	-0.148867	0.077507	0.0815112	-0.0117302	0.0612087	0.00291404	0.0831099	0.0543838	0.068521	0.0983366	0.0836974	0.0821304	0.0901422	0.0783905	-0.134224	-0.178695	-0.0167567	-0.0295895	0.0814934	-0.0732116	0.0437978	-0.148501	-0.101375	0.0266843	-0.205012	-0.230972	-0.189257	-0.136828	-0.0386062	-0.0476016	-0.147	-0.0927554	-0.209389	-0.257718	-0.203219	-0.176824	-0.150546	-0.248913	-0.230423	0.379045	-0.231487	-0.234018	-0.00135448	-0.148306	-0.242194	-0.295571	-0.141751	-0.0695344
Scandi1vium goeteborgense	-0.278045	-0.050895	-0.012624	-0.0103753	-0.0230873	-0.0202319	-0.0456916	-0.00982428	-0.0298843	-0.0196212	0.0105768	-0.00958723	-0.00928018	-0.00359921	-0.0136015	-0.0808693	-0.136462	-0.0399067	-0.0735981	-0.0190525	0.0368628	-0.0307145	-0.136653	-0.109566	-0.0502421	-0.105811	-0.148201	-0.151064	-0.05865	-0.0949849	-0.0177245	-0.0523939	-0.100109	-0.111828	-0.202573	-0.126193	-0.149409	-0.131807	-0.181325	-0.16062	0.433906	-0.174894	-0.17526	-0.0765016	-0.138518	-0.182591	-0.213188	-0.147133	-0.108925
Erwinia gerundensis	-0.484872	-0.261121	-0.00608192	-0.00103015	-0.147359	0.0125058	-0.0897215	0.000418174	-0.0192859	0.000160579	0.00382056	0.000683003	0.00152241	0.00352985	-0.00136144	-0.132495	-0.242274	-0.041401	-0.0677491	0.0224429	-0.246518	-0.0296383	-0.184669	-0.11177	-0.0484966	-0.220527	-0.207209	-0.185032	-0.160289	0.388368	0.0490388	-0.153733	-0.0744136	-0.198433	-0.228035	-0.248684	-0.0362161	-0.142706	-0.232187	-0.176996	-0.0192378	-0.198498	-0.152857	0.520607	-0.196807	-0.156152	-0.254324	0.0290221	0.214015
Pseudomo1s chlororaphis	-0.589527	-0.309131	0.0210008	0.027185	-0.155241	0.0249099	-0.0839306	0.0286246	0.00362902	0.0246645	0.0296797	0.0293645	0.0265201	0.0317171	0.0270142	-0.165885	-0.22086	-0.000892265	-0.0605261	0.0308747	-0.29031	-0.00583128	-0.196487	-0.120247	-0.028058	-0.265012	-0.231827	-0.192167	-0.204743	0.29538	-0.0430896	-0.218741	-0.0662621	-0.269196	-0.237518	-0.271032	-0.0598206	-0.162104	-0.254302	-0.227104	-0.0654573	-0.232963	-0.184882	0.453957	-0.172335	-0.183451	-0.288414	0.0209874	0.104085
Halopseudomo1s aestusnigri	-0.650107	-0.355912	0.154638	0.158724	-0.0747494	0.111046	0.0196654	0.163415	0.130487	0.143533	0.146586	0.164751	0.157972	0.169962	0.161103	-0.195521	0.345651	-0.0341184	0.016857	0.165214	-0.32977	0.104762	-0.151346	-0.0699144	0.104841	-0.335381	-0.249437	-0.173379	-0.2858	-0.0484307	-0.158366	-0.336441	-0.0963616	-0.330236	-0.201548	-0.273505	-0.086207	-0.119484	-0.242328	-0.261607	-0.162873	-0.227424	-0.244133	0.064004	-0.0711511	-0.237439	-0.3051	-0.133477	-0.0491116
Stenotrophomo1s maltophilia	-0.797604	-0.365311	0.227077	0.240102	-0.0439254	0.195091	0.0748827	0.238337	0.199748	0.219522	0.227104	0.239371	0.232464	0.244869	0.233976	-0.218205	-0.179675	0.0232652	0.0550845	0.2301	-0.372594	0.173171	-0.167783	-0.0597533	0.169302	-0.360135	-0.250831	-0.233325	-0.269849	0.0929371	-0.11516	-0.334514	-0.140807	-0.391345	-0.269868	-0.321563	-0.0677224	-0.13653	-0.296364	-0.324602	-0.0489834	-0.255696	-0.206453	0.171454	-0.142103	-0.222393	-0.359076	-0.0744755	0.0874974
Luteimo1s sp. MC1825	-0.589677	-0.314492	0.193779	0.196185	-0.0183092	0.146165	0.0696838	0.201599	0.17138	0.180946	0.183774	0.202984	0.195697	0.207562	0.199071	-0.177277	0.333837	-0.0403915	0.0531292	0.199084	-0.287215	0.143314	-0.109038	-0.0343767	0.147958	-0.306391	-0.203298	-0.140336	-0.266406	-0.0970071	-0.150442	-0.318633	-0.0802338	-0.305721	-0.158903	-0.226558	-0.0650599	-0.0875527	-0.199154	-0.237459	-0.163988	-0.193902	-0.226236	-0.017358	-0.0315213	-0.225993	-0.260352	-0.126954	-0.0745199
Vibrio fluvialis	-0.539467	-0.291728	-0.0234216	-0.0146593	-0.178875	-0.00835532	-0.115745	-0.0162932	-0.0381629	-0.0174197	-0.0127009	-0.0158618	-0.0153622	-0.0132619	-0.0175941	-0.140094	-0.262532	0.0192817	-0.0834991	-0.000640635	-0.275248	-0.041411	-0.207386	-0.131028	-0.06863	-0.244162	-0.227242	-0.205773	-0.175269	0.357806	0.0187224	-0.178012	-0.0879664	-0.225221	-0.254377	-0.274152	-0.061756	-0.161634	-0.26357	-0.197931	-0.0310509	-0.215952	-0.135454	0.504681	-0.206948	-0.161978	-0.282929	0.0213519	0.193673
Aeromo1s hydrophila	-0.663608	-0.352933	0.00239507	0.00887708	-0.187052	0.0012957	-0.116068	0.0109035	-0.0206727	0.00284566	0.0090504	0.0114403	0.00946889	0.0161564	0.00843259	-0.187795	-0.13772	0.0460217	-0.0903349	0.0190818	-0.303735	-0.0329802	-0.245861	-0.160206	-0.0566147	-0.297693	-0.283533	-0.23996	-0.253291	0.265821	-0.0449252	-0.250243	-0.0881528	-0.306815	-0.296892	-0.312948	-0.110819	-0.203363	-0.315602	-0.275834	-0.0694631	-0.284257	-0.240064	0.439894	-0.212683	-0.203718	-0.353164	-0.0317602	0.0958438
Agrobacterium tumefaciens	-0.686669	-0.375799	-0.0458591	-0.0390962	-0.245483	-0.0522168	-0.168178	-0.0368902	-0.0676511	-0.0467484	-0.0391043	-0.0356937	-0.0385947	-0.0329163	-0.0388585	-0.192772	-0.220592	-0.00810185	-0.131621	-0.0269239	-0.356078	-0.0764721	-0.260669	-0.187004	-0.100871	-0.319674	-0.232496	-0.207332	-0.254137	0.180139	-0.0180738	-0.281345	-0.107069	-0.319689	-0.248686	-0.323438	-0.0282854	-0.189049	-0.288115	-0.263126	-0.055229	-0.280635	-0.209296	0.409074	-0.202811	-0.219229	-0.321037	-0.0363227	0.0647563
Sphingomo1s paucimobilis	-0.298416	-0.268348	-0.00628647	-0.00140655	-0.161734	-0.0446221	-0.101481	-0.000443242	-0.0251267	-0.0164373	-0.0168893	8.26181e-05	-0.00534302	0.00692665	-0.00154684	-0.173581	0.570996	-0.0352187	-0.0744003	-0.00146769	-0.258394	-0.0365385	-0.146742	-0.108074	-0.0382656	-0.213158	-0.224063	-0.146355	-0.204584	-0.183997	-0.210257	-0.257848	-0.111805	-0.213749	-0.120891	-0.212646	-0.0808766	-0.108375	-0.153842	-0.165242	-0.113185	-0.160695	-0.167292	-0.0732456	-0.0117801	0.0184284	-0.223993	-0.0787245	-0.128735
Burkholderia cenocepacia	-0.797182	-0.414555	0.0291974	0.0471301	-0.216219	-0.0114617	-0.119125	0.039278	0.0012537	0.0188493	0.033962	0.0416448	0.033538	0.0443281	0.0368576	-0.242444	-0.158267	-0.00543311	-0.0983676	0.0367043	-0.403792	0.0163495	-0.217475	-0.176913	-0.0297295	-0.389829	-0.321479	-0.194792	-0.291832	-0.117784	-0.18005	-0.374614	-0.0131661	-0.401066	-0.254831	-0.352621	-0.132883	-0.182718	-0.313271	-0.308366	-0.0395668	-0.311087	-0.113782	0.106446	-0.0627687	-0.262282	-0.366071	0.00983975	-0.145823
Burkholderia multivorans	-0.597954	-0.33156	-0.0259019	-0.0226675	-0.204013	-0.0278294	-0.135325	-0.0180474	-0.044825	-0.0244974	-0.0195062	-0.01712	-0.0205223	-0.0147743	-0.0197771	-0.173839	-0.201737	-0.0389161	-0.105503	-0.0163606	-0.310562	-0.0595232	-0.230386	-0.156073	-0.0764917	-0.275948	-0.201504	-0.186877	-0.226827	0.221462	-0.0268666	-0.245134	-0.102132	-0.280854	-0.218519	-0.279999	-0.0145391	-0.171585	-0.249387	-0.237025	-0.0719772	-0.249512	-0.223731	0.421201	-0.191792	-0.189564	-0.284292	-0.0254195	0.0636055
Paraburkholderia caribensis	-0.535248	-0.28982	-0.0414161	-0.0374021	-0.192667	-0.0269033	-0.13161	-0.0338743	-0.0572136	-0.0388506	-0.0348776	-0.0337667	-0.0316002	-0.0300088	-0.0360735	-0.145552	-0.206204	0.0660903	-0.0980447	-0.00117149	-0.274269	-0.0704904	-0.214336	-0.146891	-0.0864174	-0.238294	-0.211904	-0.19473	-0.191743	0.334182	0.0791522	-0.179133	-0.0798302	-0.221949	-0.236871	-0.27124	-0.0287519	-0.162262	-0.252529	-0.199361	-0.0251073	-0.223164	-0.188141	0.498829	-0.215015	-0.148227	-0.266267	-0.0109834	0.211331
Sutterella wadsworthensis	-0.00245424	-0.241986	-0.0480357	-0.0478676	-0.173591	-0.083584	-0.127315	-0.0454923	-0.0490783	-0.0633534	-0.0657734	-0.0436494	-0.050327	-0.0404805	-0.0477625	-0.15921	-0.162005	-0.0456155	-0.117356	-0.0621531	-0.230743	-0.0840843	-0.132013	-0.103801	-0.0951505	-0.183934	-0.184179	-0.17855	-0.145695	-0.187101	-0.193533	-0.279251	-0.133828	-0.143252	-0.0517458	-0.194039	-0.0930367	-0.0957814	-0.140004	-0.14905	-0.113237	-0.176479	-0.16892	-0.136367	-0.0704487	0.0987389	-0.205995	-0.0199654	-0.232848
Massilia lutea	-0.264153	0.0556603	0.988113	0.993344	0.818533	0.972324	0.923286	0.991512	0.982125	0.981764	0.980287	0.990841	0.987392	0.995507	0.98526	-0.0249032	0.0174521	0.0495731	0.732473	0.973793	0.0590445	0.920569	0.347494	0.518962	0.943902	-0.0849403	-0.0931923	-0.114508	-0.0666595	0.475083	-0.0206065	-0.0637861	0.0242393	-0.0902777	-0.125335	0.0803378	-0.141428	0.172311	-0.0350413	-0.0780159	-0.0731138	0.122379	-0.0244959	-0.0653547	0.162043	-0.0940163	-0.111811	0.118895	0.411253
Chromobacterium sp. ATCC 53434	-0.263924	0.0528825	0.989127	0.993756	0.819414	0.97325	0.924745	0.992381	0.983554	0.982864	0.980678	0.99176	0.988376	0.996103	0.986186	-0.0228434	-0.0113399	0.0534248	0.735024	0.980312	0.0559928	0.920475	0.362302	0.521735	0.94822	-0.0893163	-0.10476	-0.100855	-0.0647098	0.481259	-0.0311125	-0.0632759	0.0457933	-0.0855355	-0.118433	0.0776717	-0.152388	0.179257	-0.0306831	-0.0732895	-0.0794484	0.122013	-0.0316534	-0.0535713	0.169918	-0.097341	-0.107571	0.126283	0.412111
Campylobacter jejuni	-0.490462	-0.270039	-0.0427569	-0.0377765	-0.180651	-0.0252704	-0.125088	-0.0360599	-0.0561341	-0.0386824	-0.0340514	-0.0357014	-0.0336726	-0.0327166	-0.0381283	-0.136406	-0.238599	-0.0326714	-0.0978795	-0.00159842	-0.256487	-0.0640459	-0.196672	-0.135787	-0.0848662	-0.227483	-0.20579	-0.174388	-0.166448	0.34798	0.0871504	-0.159472	-0.0602724	-0.197297	-0.220702	-0.258407	-0.0201146	-0.146389	-0.233495	-0.172667	-0.00547485	-0.206791	-0.142948	0.509439	-0.192984	-0.16039	-0.247508	0.0249527	0.214048
Campylobacter coli	-0.394614	-0.212777	-0.0212748	-0.0171696	-0.129405	-0.00207603	-0.0844726	-0.0156522	-0.0317447	-0.0194711	-0.0154864	-0.015529	-0.0110882	-0.0122071	-0.0181112	-0.104981	-0.190609	-0.028563	-0.0695426	0.0328609	-0.202313	-0.0404811	-0.154162	-0.10277	-0.0574311	-0.182166	-0.167871	-0.149599	-0.135637	0.324739	0.154372	-0.115226	-0.0429112	-0.142317	-0.188967	-0.212975	-0.00330599	-0.110221	-0.196158	-0.130681	0.0184622	-0.162621	-0.0987798	0.43585	-0.163458	-0.130636	-0.198439	0.024678	0.259684
Desulfovibrio desulfuricans	-0.415681	-0.243262	-0.0371413	-0.0390397	-0.159126	-0.0779637	-0.11536	-0.0322325	-0.0534423	-0.0491945	-0.0462835	-0.0304852	-0.0365581	-0.0301654	-0.0337408	-0.124806	-0.0543186	-0.0350139	-0.103316	-0.0264897	-0.218448	-0.0687201	-0.106615	-0.127586	-0.0594635	-0.206888	-0.0892372	-0.018178	-0.196587	-0.260027	-0.0974625	-0.241264	0.0128894	-0.233714	-0.0289619	-0.154544	0.00489752	-0.0700695	-0.0996091	-0.163664	-0.106322	-0.177361	-0.189006	-0.0590338	-0.0110393	-0.155353	-0.128973	-0.0865826	-0.210004
Desulfovibrio vulgaris	-0.421778	-0.248964	-0.0437869	-0.0450668	-0.165996	-0.0829904	-0.123092	-0.0387083	-0.0589913	-0.0551573	-0.0518258	-0.0368829	-0.0430199	-0.0365934	-0.039929	-0.127133	-0.0570953	-0.0355415	-0.10047	-0.0356074	-0.224421	-0.0700142	-0.113655	-0.123433	-0.0658541	-0.210944	-0.0751849	-0.0182986	-0.196731	-0.249471	-0.0874124	-0.243109	-0.00546527	-0.230255	-0.0251406	-0.157346	0.0268425	-0.0646402	-0.0949618	-0.157805	-0.106215	-0.168595	-0.183223	-0.0497085	-0.0217989	-0.159214	-0.128194	-0.0855694	-0.206869
Desulfovibrio fairfieldensis	-0.402539	-0.234424	-0.0117888	-0.012634	-0.131149	-0.0504162	-0.0885159	-0.00694368	-0.0233526	-0.0229119	-0.0203688	-0.0050528	-0.0112206	-0.00482965	-0.00777833	-0.121744	-0.0329386	-0.0372767	-0.0564575	0.00287178	-0.212847	-0.0295367	-0.0613855	-0.0818292	-0.0257997	-0.203315	-0.104223	0.0132199	-0.183651	-0.232771	-0.116455	-0.232529	0.0451603	-0.205809	-0.00756796	-0.146289	-0.0012062	-0.0275483	-0.077124	-0.134164	-0.104894	-0.141999	-0.180565	-0.066904	0.00364603	-0.15543	-0.11636	-0.0629131	-0.20833
Desulfosarci1 widdelii	-0.576642	-0.26439	0.233012	0.238389	0.0421103	0.238069	0.127488	0.240568	0.217256	0.236607	0.239941	0.240943	0.237957	0.243923	0.237857	-0.144842	-0.221362	-0.0126148	0.107302	0.236425	-0.246027	0.190933	-0.0992572	0.00930937	0.17907	-0.255419	-0.205354	-0.199558	-0.188478	0.414689	-0.0241956	-0.20301	-0.0897112	-0.2446	-0.235489	-0.21726	-0.0602306	-0.101946	-0.22915	-0.208058	-0.0744642	-0.170112	-0.181237	0.432718	-0.139435	-0.190694	-0.274416	0.0405002	0.220525
Fusobacterium ulcerans	0.0153763	-0.17513	-0.0389811	-0.0379972	-0.110671	-0.0625802	-0.0984399	-0.0362218	-0.0430061	-0.049733	-0.0468141	-0.035148	-0.0393917	-0.031925	-0.0379943	-0.109777	-0.133588	-0.0201425	-0.0830027	-0.0556151	-0.138986	-0.0530444	-0.144483	-0.10008	-0.0849929	-0.134568	-0.142072	-0.183686	-0.120547	-0.101721	-0.0914106	-0.192926	-0.0923833	0.0365703	-0.114966	-0.155442	-0.0874511	-0.145634	-0.161813	-0.142313	-0.0670175	-0.157531	-0.173934	-0.0854454	-0.124593	-0.0215896	-0.185767	-0.116057	-0.175912
Fusobacterium necrophorum	-0.663326	-0.103222	0.531269	0.54876	0.293398	0.515954	0.415876	0.541318	0.512141	0.5246	0.555506	0.540853	0.537789	0.546228	0.536641	-0.147924	-0.179812	0.404469	0.36163	0.524925	-0.200802	0.499377	0.028178	0.168566	0.476984	-0.275626	-0.302406	-0.223253	-0.0900348	0.207836	-0.154564	-0.173967	-0.0898504	-0.289895	-0.314992	-0.192247	-0.238423	-0.0639451	-0.263729	-0.232856	0.450266	-0.0992309	-0.120579	-0.00162623	-0.0427979	-0.160279	-0.327199	-0.0624923	0.215368
Eremothecium gossypii	-0.239833	0.0677437	0.992637	0.997474	0.8309	0.979966	0.933331	0.995678	0.988242	0.98723	0.985063	0.994948	0.991979	0.999228	0.989538	-0.0146691	-0.0206423	0.0511026	0.742321	0.982351	0.0691967	0.925913	0.369466	0.53052	0.952375	-0.0767405	-0.0924526	-0.100457	-0.051503	0.502911	-0.0182503	-0.0479631	0.0395276	-0.0690845	-0.11463	0.0896719	-0.14498	0.184951	-0.0228621	-0.0608781	-0.0710471	0.134947	-0.0178118	-0.0460575	0.169581	-0.0894975	-0.0976297	0.135456	0.430176
Methanobrevibacter millerae	-0.236536	0.0670765	0.992425	0.997363	0.831705	0.980021	0.933719	0.995125	0.987348	0.986498	0.984398	0.994353	0.991259	0.998828	0.988913	-0.0142417	-0.0197965	0.0591578	0.741155	0.980099	0.077475	0.926196	0.363611	0.527751	0.951206	-0.0753093	-0.093044	-0.105776	-0.0533467	0.491008	-0.0220733	-0.0489728	0.0334012	-0.0756106	-0.121459	0.0913515	-0.15173	0.180203	-0.0249075	-0.0669724	-0.0714886	0.135433	-0.0125733	-0.0595388	0.165973	-0.0853956	-0.100882	0.130997	0.429925
Lachancea thermotolerans	-0.228589	0.076438	0.993285	0.998314	0.836051	0.980299	0.936961	0.996227	0.989437	0.987958	0.985601	0.995452	0.992538	0.999698	0.990053	-0.0107369	-0.0143269	0.0521691	0.743911	0.982015	0.0770455	0.927375	0.37449	0.535189	0.954945	-0.069619	-0.0845926	-0.0943723	-0.0402208	0.497941	-0.0178169	-0.040778	0.0409986	-0.0642887	-0.108938	0.0954069	-0.138868	0.188014	-0.0172801	-0.0588906	-0.0710415	0.140951	-0.00830546	-0.0568045	0.175493	-0.0845435	-0.0883813	0.136387	0.431781
Geobacillus sp. GHH01	-0.165923	-0.16996	0.00453432	0.0085136	-0.107005	-0.0194489	-0.0624669	0.00885012	-0.00756393	-0.000865636	-0.00148046	0.00884843	0.00529786	0.0152487	0.00873915	-0.127632	0.702417	-0.025415	-0.0356271	0.00424508	-0.17927	-0.0133637	-0.120765	-0.0588186	-0.0193366	-0.138164	-0.184675	-0.135159	-0.131872	-0.0974578	-0.168799	-0.168349	-0.128167	-0.132773	-0.114381	-0.159769	-0.0688319	-0.0889303	-0.117823	-0.107203	-0.0708449	-0.0948326	-0.105022	-0.0505198	-0.0146487	0.0280034	-0.180204	-0.0891002	-0.0662602
Geobacillus sp. C56-T3	-0.148643	-0.162937	-0.0165212	-0.0126954	-0.121746	-0.0384182	-0.0800676	-0.0123303	-0.028259	-0.0219193	-0.0226089	-0.0124507	-0.015694	-0.00593355	-0.0125156	-0.126871	0.699142	-0.0275296	-0.0509488	-0.0161903	-0.173433	-0.0332065	-0.125556	-0.0690375	-0.0400938	-0.116784	-0.182118	-0.13395	-0.130549	-0.101404	-0.162783	-0.161101	-0.121013	-0.127854	-0.109665	-0.151245	-0.0643326	-0.0921973	-0.113807	-0.102639	-0.0580654	-0.0954885	-0.105622	-0.0498045	-0.0175937	0.0583891	-0.175233	-0.0840129	-0.0692321
Geobacillus thermoleovorans	-0.152199	-0.169272	-0.0153272	-0.0116299	-0.121976	-0.0385181	-0.0800879	-0.0111967	-0.0269996	-0.0204838	-0.0209709	-0.0112088	-0.0146408	-0.00485112	-0.0112259	-0.127068	0.701391	-0.0299858	-0.0493148	-0.0146739	-0.178216	-0.0318075	-0.125389	-0.0681905	-0.0380254	-0.133385	-0.182306	-0.131291	-0.128729	-0.103229	-0.16739	-0.165476	-0.126305	-0.125734	-0.109238	-0.15915	-0.0648451	-0.0909823	-0.113822	-0.102998	-0.0681247	-0.0956544	-0.10343	-0.0470429	-0.0147081	0.0346309	-0.175756	-0.0885408	-0.0727701
Geobacillus kaustophilus	-0.152803	-0.166036	-0.0135239	-0.00970853	-0.121255	-0.0362891	-0.0786075	-0.00928299	-0.0255383	-0.0187546	-0.0195294	-0.00933133	-0.0127912	-0.00291175	-0.00933167	-0.127955	0.699311	-0.0255382	-0.0484028	-0.0132736	-0.178575	-0.0305215	-0.125818	-0.0677962	-0.0366103	-0.127657	-0.184557	-0.133862	-0.130268	-0.103129	-0.167575	-0.164537	-0.1257	-0.128748	-0.111129	-0.15882	-0.0663957	-0.091844	-0.114492	-0.104633	-0.0649933	-0.096041	-0.104894	-0.0482227	-0.0169366	0.0447802	-0.177592	-0.0860067	-0.0721604
Streptococcus periodonticum	-0.401521	-0.176891	0.174851	0.193638	0.0360409	0.148178	0.0988952	0.179359	0.161583	0.171927	0.172917	0.180412	0.177555	0.181635	0.179699	-0.033187	-0.172472	0.0275876	0.078788	0.158462	-0.169845	0.163135	-0.0374478	0.0123352	0.152423	-0.18445	-0.144371	-0.146158	-0.127193	-0.0292568	-0.153178	-0.1552	-0.111029	-0.185259	-0.185261	-0.145241	-0.189902	-0.0281127	-0.19402	-0.148342	-0.0675424	-0.0901276	-0.0089958	-0.0854713	-0.0924859	-0.127896	-0.211936	-0.096885	0.0636358
Te1cibaculum sp. SZ-18	0.141894	0.145979	0.0234874	0.0315185	0.0852286	0.0437115	0.0568022	0.0230896	0.0289244	0.00697616	0.0145775	0.0207603	0.0257426	0.0298539	0.0184641	-0.0331233	-0.0453706	-0.0519457	-0.0349917	0.0264706	0.183546	0.00685076	0.044239	-0.0448912	0.00246181	0.190011	-0.0260476	-0.175478	-0.0631095	0.101042	0.115927	0.15598	0.118053	0.0892581	-0.0850852	0.174266	-0.0644121	-0.0669395	-0.0298694	-0.0494034	0.0589882	-0.0410085	-0.0643954	-0.0728409	-0.0741283	0.182621	0.0577485	0.0782129	0.155204
Acinetobacter junii	-0.0142854	0.100014	-0.00961157	-0.0289673	-0.068706	-0.00704958	-0.0307578	-0.00885265	-0.0463611	-0.00593632	-0.0130757	-0.00882274	-0.00366472	-0.0254716	0.00253052	0.126137	-0.0659816	0.313776	-0.043625	-0.0510108	-0.112699	-0.0449545	-0.0763429	-0.0807982	-0.0461271	0.0536749	-0.132284	-0.150412	-0.088621	-0.147142	-0.0861988	0.0016505	-0.0243207	-0.0613493	-0.131726	-0.0935696	-0.141877	-0.112849	-0.0814432	-0.138259	-0.043513	-0.0848282	-0.0995397	-0.0795799	-0.0880309	0.146475	-0.0642784	0.00565487	-0.0923464
Saccharolobus solfataricus	0.170551	-0.0886851	-0.0339511	-0.039223	-0.0459914	-0.0461627	-0.012488	-0.0480851	-0.0103263	-0.0297719	0.0369926	-0.0483873	-0.0544384	-0.0441428	-0.0514565	-0.0470164	-0.0311426	-0.053514	0.0904147	0.0339366	0.0812823	-0.00725818	0.0421559	-0.0537674	0.0887816	-0.0553193	0.0686228	0.14546	-0.01573	0.130816	-0.0622807	0.0770834	0.0198943	0.211636	0.0495585	-0.0718747	0.206827	0.0616928	0.222094	0.0386308	-0.0139399	-0.00854664	0.527562	0.0106127	0.395939	-0.10669	-0.0418055	-0.159781	0.19195
Methanobrevibacter smithii	-0.212815	0.0864083	0.998214	0.985437	0.834364	0.987363	0.940512	0.99733	0.975557	0.997633	0.992228	0.997898	0.998337	0.988036	0.999208	0.127245	-0.0132936	0.0523642	0.728269	0.965619	0.0582259	0.912692	0.34731	0.51714	0.938142	-0.0557501	-0.109922	-0.115716	-0.0650008	0.458947	-0.0427732	-0.0656566	0.0119703	-0.0885366	-0.132905	0.0726368	-0.169483	0.164377	-0.0418293	-0.078674	-0.0579785	0.120792	-0.0353028	-0.0802311	0.143003	-0.0640172	-0.092508	0.100581	0.396796
Xanthobacter autotrophicus	-0.178742	-0.150486	-0.0543998	-0.0414872	-0.0738613	-0.0701227	-0.0769783	-0.0498833	-0.0689793	-0.0690573	-0.0647496	-0.0513168	-0.052205	-0.04393	-0.0525526	-0.0662826	-0.0391336	0.354246	-0.0801995	-0.0591789	-0.045617	-0.0509797	-0.0656038	-0.120719	-0.0630077	-0.0651862	-0.0442067	-0.152556	-0.101064	-0.0302444	-0.0414169	-0.0266756	0.060305	-0.0997335	-0.0399959	-0.0364456	-0.0958196	-0.111303	-0.0926502	-0.131124	-0.114255	-0.110508	-0.0306685	-0.0591666	-0.0207936	0.060872	-0.0282481	0.0936816	-0.0634538
Streptococcus sp. CNU G3	-0.242126	0.0741357	0.996982	0.990223	0.826777	0.98401	0.935023	0.997239	0.977477	0.9953	0.99214	0.997706	0.997073	0.990657	0.997563	0.0906088	-0.0255807	0.0496698	0.728502	0.967235	0.0473053	0.920189	0.345753	0.515741	0.939426	-0.0716527	-0.117771	-0.119795	-0.0657421	0.45454	-0.0483895	-0.0704182	0.0218081	-0.0955099	-0.139106	0.0649987	-0.173863	0.163302	-0.0487205	-0.0812446	-0.0492173	0.116463	-0.0113527	-0.0828587	0.15485	-0.0783392	-0.106041	0.118517	0.389913
Streptococcus sp. CNU G2	-0.237402	0.0723861	0.995486	0.985424	0.824991	0.982668	0.933484	0.994889	0.972077	0.994622	0.990146	0.995618	0.99565	0.985798	0.996749	0.118232	-0.0262014	0.0502826	0.721942	0.961306	0.0453678	0.915103	0.339359	0.509233	0.933296	-0.0680028	-0.124055	-0.125573	-0.0734812	0.444882	-0.0526468	-0.0777505	0.019844	-0.0998236	-0.145296	0.0605001	-0.181799	0.15693	-0.055766	-0.0871302	-0.065212	0.110321	-0.0107447	-0.0879476	0.150193	-0.0735704	-0.106756	0.116574	0.382393
Lactobacillus paragasseri	-0.354252	-0.204253	-0.0339892	0.0017131	-0.136262	-0.0602094	-0.0962371	-0.0301302	-0.0466416	-0.0373968	-0.0262914	-0.0277646	-0.0336211	-0.0280919	-0.0293785	-0.121372	-0.106309	-0.0308179	-0.0831128	-0.0559961	-0.1907	0.036632	-0.112623	-0.100879	-0.0656072	-0.181395	-0.200536	-0.135611	-0.110419	-0.209298	-0.159806	-0.183519	0.0877659	-0.18085	-0.169535	-0.178061	-0.162561	-0.101542	-0.18636	-0.128808	-0.0984258	-0.135688	0.334335	-0.118879	0.0994972	-0.127915	-0.202937	0.216704	-0.19743
Limosilactobacillus vagi1lis	-0.438732	-0.295167	-0.0454534	-0.0398911	-0.201135	-0.088894	-0.142966	-0.0390409	-0.0618378	-0.0548894	-0.0523297	-0.0376067	-0.0438447	-0.0330789	-0.0385344	-0.159952	0.608591	-0.0507797	-0.0951816	-0.0401466	-0.277485	-0.0592493	-0.16688	-0.119208	-0.0707128	-0.261713	-0.191151	-0.104669	-0.20827	-0.230492	-0.199476	-0.268266	-0.0967458	-0.240358	-0.116699	-0.228006	-0.0599628	-0.105953	-0.163191	-0.171447	-0.134829	-0.168167	-0.153448	-0.0698309	-0.0334496	-0.177357	-0.221532	-0.157438	-0.188953
Vaginimicrobium propionicum	-0.302182	-0.155101	-0.0214223	-0.0127027	-0.118005	-0.0370519	-0.0780272	-0.0157092	-0.031953	-0.0254633	-0.0213091	-0.0169092	-0.0151169	-0.0142299	-0.0159059	-0.0869939	-0.00627374	0.994386	0.0177989	-0.0191523	-0.150668	-0.0201273	-0.110181	-0.0602826	-0.0373782	-0.123515	-0.152112	-0.126226	-0.10211	-0.0712129	-0.123693	-0.159214	-0.0675777	-0.136868	-0.146877	-0.161384	-0.135837	-0.124373	-0.161872	-0.124899	-0.0586344	-0.092234	-0.0949223	-0.00314015	-0.0646687	0.0717604	-0.17481	-0.118632	-0.0580027
Torulaspora globosa	-0.221548	0.0809924	0.998981	0.994059	0.836204	0.986782	0.940502	0.999831	0.985036	0.996572	0.992602	0.999929	0.998886	0.995916	0.998525	0.068293	-0.0115633	0.0523794	0.741468	0.975121	0.0609356	0.924139	0.361022	0.53075	0.948683	-0.063962	-0.0977404	-0.105025	-0.0577302	0.477255	-0.0328114	-0.0569498	0.0229705	-0.0754273	-0.119625	0.0805356	-0.154075	0.180799	-0.0295905	-0.0652165	-0.0638314	0.133025	-0.0246025	-0.071997	0.1552	-0.0750616	-0.0918077	0.114935	0.406143
Eremothecium sinecaudum	-0.21841	0.0850837	0.999231	0.990086	0.835175	0.987352	0.940851	0.999228	0.980278	0.997874	0.993118	0.999569	0.999402	0.992358	0.999593	0.100396	-0.0139788	0.0514818	0.732517	0.971024	0.0577119	0.917351	0.352472	0.521269	0.943231	-0.0589578	-0.105924	-0.11294	-0.0628879	0.469077	-0.0368186	-0.061017	0.0192714	-0.0829257	-0.12895	0.0752409	-0.164671	0.169492	-0.0393073	-0.0739074	-0.0605694	0.122643	-0.0318256	-0.0734212	0.14892	-0.0691745	-0.0936547	0.106504	0.401405
[truncated: 701 more columns]

## Sheet: Lumen score
Table S8-2. Pairwise microbial taxon correlations in lumen samples identified by CCrepe analysis
	Homo sapiens	Saccharomyces cerevisiae	1umovozyma castellii	1umovozyma dairenensis	Kluyveromyces marxianus	Tetrapisispora phaffii	Candida tropicalis	Candida dubliniensis	Candida albicans	Pichia kudriavzevii	Yarrowia lipolytica	Botrytis cinerea	Fusarium poae	Fusarium graminearum	Fusarium vene1tum	Fusarium pseudograminearum	Fusarium oxysporum	Fusarium verticillioides	Fusarium fujikuroi	Fusarium musae	Purpureocillium takamizusanense	Drechmeria coniospora	Ustilaginoidea virens	Pochonia chlamydosporia	Colletotrichum higginsianum	Thermothelomyces thermophilus	Thermothielavioides terrestris	Neurospora crassa	Pyricularia grisea	Pyricularia pennisetige1	Aspergillus oryzae	Aspergillus luchuensis	Aspergillus puulaauensis	Aspergillus chevalieri	Talaromyces rugulosus	Zymoseptoria tritici	Schizosaccharomyces pombe	Psilocybe cubensis	Cryptococcus neoformans	Puccinia striiformis	Sporisorium graminicola	Toxoplasma gondii	Besnoitia besnoiti	Neospora caninum	Babesia bigemi1	Plasmodium malariae	Plasmodium vivax	Plasmodium cynomolgi	Plasmodium knowlesi
Homo sapiens	1	0.284487	0.40794	0.273866	0.484406	-0.371284	0.0346339	0.509086	0.0459064	0.369602	0.321315	0.378354	0.332728	0.395375	0.274268	0.149178	0.195626	0.192179	0.191026	0.433446	0.498961	0.34391	0.419782	0.364402	0.518461	0.428813	0.16495	0.508513	0.0998136	-0.00017845	0.250274	0.416051	-0.14581	0.139454	0.283508	0.171245	0.164221	0.380363	-0.308148	0.304589	0.349616	0.65094	0.369042	0.269242	0.119377	0.431968	0.515822	0.422168	0.368262
Saccharomyces cerevisiae	0.284487	1	0.547638	0.442348	0.522698	0.0750592	-0.0567085	0.516078	0.118647	0.587593	-0.0314348	0.868578	0.165314	-0.0407074	0.0826479	0.109448	0.634021	0.56457	0.309241	0.0270362	-0.062089	0.577382	0.00355072	-0.159582	0.0565781	-0.0561871	0.612264	0.091701	-0.0361257	0.0660881	0.613245	0.254699	0.0392529	0.0953218	0.182365	0.00949877	0.369416	0.0708049	-0.0911659	-0.0220317	-0.116779	0.652729	-0.133943	-0.0305225	-0.046673	-0.107271	-0.127679	-0.0474459	-0.122786
1umovozyma castellii	0.40794	0.547638	1	0.653538	0.722326	-0.109725	-0.0502674	0.68376	0.0338188	0.85827	0.21182	0.577101	0.472336	0.3004	0.322752	0.266859	0.604931	0.687158	0.315904	0.411478	0.204697	0.602936	0.362812	0.204553	0.411747	0.292863	0.351883	0.426411	0.28014	0.372065	0.226792	0.486072	0.381209	0.348992	0.387545	0.273199	0.452556	0.363749	-0.127513	0.218038	0.350328	0.79173	0.150078	0.141599	-0.0112424	0.214734	0.0388229	0.32118	0.194056
1umovozyma dairenensis	0.273866	0.442348	0.653538	1	0.586601	-0.0919879	-0.0357185	0.591107	-0.102956	0.667955	0.26154	0.423926	0.383604	0.417951	0.347608	0.421255	0.638746	0.5075	0.301416	0.35066	0.259134	0.64464	0.618038	0.347152	0.527846	0.378331	0.537692	0.517806	0.241815	0.417929	0.229014	0.444087	0.465028	0.443062	0.492996	0.512516	0.506716	0.543186	-0.164225	0.301816	0.421218	0.509169	0.23184	0.189211	0.114169	0.276418	0.0558264	0.432402	0.218484
Kluyveromyces marxianus	0.484406	0.522698	0.722326	0.586601	1	-0.0919388	-0.0740828	0.831354	-0.0789731	0.6665	0.523893	0.503469	0.650431	0.460914	0.57686	0.316784	0.479671	0.524875	0.57277	0.373383	0.470263	0.567736	0.385794	0.412062	0.558287	0.465864	0.447194	0.583457	0.419432	0.480347	0.269193	0.815399	0.227832	0.488243	0.497305	0.232736	0.505172	0.352424	-0.158248	0.368573	0.452529	0.770291	0.465996	0.493878	0.00923907	0.416089	0.0209227	0.564816	0.15863
Tetrapisispora phaffii	-0.371284	0.0750592	-0.109725	-0.0919879	-0.0919388	1	-0.0555572	-0.159757	-0.128377	-0.0385522	-0.0376017	-0.125427	-0.0954564	-0.0522506	0.144013	-0.123074	0.0974839	0.120049	-0.00089462	-0.0163801	-0.109415	-0.0875982	-0.0307112	-0.00517888	-0.0224745	-0.135809	0.362801	-0.0552627	-0.0338459	0.153291	0.103385	-0.0322132	0.151978	0.0201981	0.141738	0.128517	0.0708774	-0.0942023	-0.0909733	0.0268343	0.0855821	-0.211201	-0.0362621	-0.0800202	-0.123916	0.0205247	-0.0650433	-0.0833304	0.0860176
Candida tropicalis	0.0346339	-0.0567085	-0.0502674	-0.0357185	-0.0740828	-0.0555572	1	0.216344	0.180785	-0.0491485	-0.0314627	0.00480317	-0.0672159	-0.086178	-0.080723	-0.0608246	-0.0686142	-0.0152845	-0.0274527	0.0148894	-0.0536913	-0.0141401	-0.100936	-0.0553164	0.0140043	-0.0496243	0.00782264	-0.0161883	-0.0658188	-0.0604207	0.324101	-0.0522291	0.141692	0.0361919	0.0235291	0.286721	0.0555459	0.0165834	-0.0366482	-0.0277168	-0.0214102	-0.106063	-0.0995186	-0.0468602	-0.0430726	-0.107623	0.0562003	-0.120143	-0.0882625
Candida dubliniensis	0.509086	0.516078	0.68376	0.591107	0.831354	-0.159757	0.216344	1	0.105097	0.729975	0.489908	0.578492	0.418666	0.477218	0.485465	0.189107	0.579645	0.620002	0.498835	0.359376	0.411766	0.728701	0.435425	0.428749	0.486572	0.361182	0.401741	0.519223	0.171733	0.280642	0.316354	0.651893	0.30846	0.442269	0.453444	0.31606	0.493523	0.374168	-0.174221	0.378603	0.433362	0.752947	0.41156	0.398163	0.0136692	0.379647	0.108504	0.445952	0.255221
Candida albicans	0.0459064	0.118647	0.0338188	-0.102956	-0.0789731	-0.128377	0.180785	0.105097	1	0.0184944	-0.138762	0.233061	-0.101804	-0.187606	-0.156176	-0.0792891	0.130623	-0.024663	0.0363376	0.0175866	-0.169547	0.0450529	-0.143404	-0.224564	-0.16763	-0.184781	-0.0828616	-0.172859	-0.150747	-0.161999	0.168088	-0.153282	-0.116087	-0.101351	-0.159528	0.0183693	-0.0711795	-0.129941	-0.0458791	-0.132018	-0.190017	0.100406	-0.188447	-0.124795	-0.058901	-0.210134	-0.105961	-0.202659	-0.21235
Pichia kudriavzevii	0.369602	0.587593	0.85827	0.667955	0.6665	-0.0385522	-0.0491485	0.729975	0.0184944	1	0.147549	0.643719	0.26009	0.264313	0.2638	0.097264	0.717781	0.769112	0.328577	0.39577	0.102461	0.708663	0.359954	0.270996	0.294516	0.154689	0.405366	0.32511	0.0644242	0.197679	0.246439	0.393115	0.454752	0.285966	0.391148	0.286923	0.548509	0.347405	-0.119182	0.250409	0.306198	0.731633	0.129035	0.0689411	-0.0781739	0.240676	0.0727046	0.223431	0.257934
Yarrowia lipolytica	0.321315	-0.0314348	0.21182	0.26154	0.523893	-0.0376017	-0.0314627	0.489908	-0.138762	0.147549	1	-0.00310699	0.604184	0.80432	0.840586	0.0361435	0.158014	0.1131	0.688661	0.205104	0.709039	0.384862	0.566693	0.768885	0.667935	0.485122	0.272435	0.64989	0.446067	0.504717	-0.0212123	0.625947	0.0864498	0.549756	0.527364	0.192901	0.375103	0.423044	-0.105686	0.671923	0.630816	0.266569	0.877857	0.891895	0.0810383	0.675943	0.0976951	0.752247	0.251337
Botrytis cinerea	0.378354	0.868578	0.577101	0.423926	0.503469	-0.125427	0.00480317	0.578492	0.233061	0.643719	-0.00310699	1	0.0467412	0.00282541	0.0592941	0.00443669	0.735539	0.604971	0.298834	0.16193	-0.052885	0.62208	0.0977229	-0.0738997	0.0586047	-0.0648858	0.533908	0.0491919	-0.128377	0.013358	0.70614	0.258148	0.162775	0.146017	0.264692	0.150092	0.37202	0.0753999	-0.140225	0.0338076	-0.0504021	0.702169	-0.09203	-0.0301643	-0.0991919	-0.0855511	-0.11033	-0.0505996	-0.106288
Fusarium poae	0.332728	0.165314	0.472336	0.383604	0.650431	-0.0954564	-0.0672159	0.418666	-0.101804	0.26009	0.604184	0.0467412	1	0.562804	0.538745	0.349696	0.0858504	0.0935388	0.453173	0.222096	0.487731	0.221503	0.355457	0.38769	0.654364	0.499019	0.267711	0.569067	0.805254	0.626588	-0.112959	0.494604	0.00355441	0.498088	0.326234	0.0068711	0.170189	0.378283	-0.10445	0.436662	0.453837	0.422321	0.516654	0.606008	0.0166658	0.474992	-0.00849987	0.710128	0.23152
Fusarium graminearum	0.395375	-0.0407074	0.3004	0.417951	0.460914	-0.0522506	-0.086178	0.477218	-0.187606	0.264313	0.80432	0.00282541	0.562804	1	0.712827	0.0801194	0.273858	0.158023	0.490534	0.159298	0.703167	0.426604	0.647269	0.687191	0.706244	0.495569	0.301849	0.703594	0.366519	0.450006	-0.0983096	0.524882	0.130897	0.541027	0.470743	0.244036	0.261455	0.707642	-0.158063	0.570768	0.614419	0.316186	0.763998	0.712035	0.22659	0.641169	0.232745	0.72673	0.449647
Fusarium vene1tum	0.274268	0.0826479	0.322752	0.347608	0.57686	0.144013	-0.080723	0.485465	-0.156176	0.2638	0.840586	0.0592941	0.538745	0.712827	1	0.0970173	0.313237	0.290549	0.618559	0.360102	0.717446	0.353553	0.52177	0.760646	0.714527	0.490438	0.363396	0.661083	0.33113	0.53446	0.0924403	0.802869	0.158156	0.446648	0.588116	0.280046	0.348297	0.48674	-0.12061	0.671575	0.637354	0.36411	0.799804	0.718185	0.0130713	0.599124	0.0535826	0.706709	0.278324
Fusarium pseudograminearum	0.149178	0.109448	0.266859	0.421255	0.316784	-0.123074	-0.0608246	0.189107	-0.0792891	0.097264	0.0361435	0.00443669	0.349696	0.0801194	0.0970173	1	0.123265	0.0784	-0.0106537	0.12986	0.484037	0.0790357	0.219067	-0.0196957	0.258025	0.740917	0.113326	0.479206	0.320983	0.25666	-0.0760331	0.306301	0.0579847	0.24671	0.139222	0.178987	-0.00614828	0.0962657	-0.114218	0.0840185	0.127432	0.228082	0.20223	0.022879	0.508415	0.00569659	0.144797	0.247058	0.0126648
Fusarium oxysporum	0.195626	0.634021	0.604931	0.638746	0.479671	0.0974839	-0.0686142	0.579645	0.130623	0.717781	0.158014	0.735539	0.0858504	0.273858	0.313237	0.123265	1	0.740891	0.320991	0.382039	0.113894	0.734296	0.463474	0.172374	0.323778	0.121238	0.619163	0.282496	-0.0142146	0.330139	0.502043	0.404781	0.472098	0.332468	0.606613	0.483044	0.417472	0.31584	-0.145948	0.227298	0.284176	0.589512	0.109095	0.0304293	-0.00636478	0.0927323	0.064192	0.136185	0.134936
[truncated: 615 more rows]
[truncated: 583 more columns]

## Sheet: Large intestine score
Table S8-3. Pairwise microbial taxon correlations in large intestine samples identified by CCrepe analysis
[truncated: 781 more rows]
[truncated: 731 more columns]

## Sheet: Small intestine score
Table S8-4. Pairwise microbial taxon correlations in small intestine samples identified by CCrepe analysis
[truncated: 610 more rows]
[truncated: 560 more columns]
