# Supplementary material
Source: Research Square preprint supplement (doi:10.21203/rs.3.rs-9927529/v1)
Supplement: Supplementary file 12 [file d22cf6de9a45c0f46c3060fb.xlsx]

## Sheet: Sheet1
Table S6. AMR genes count and information from all samples
Sample	ARO Accession	diamond	CARD Short name	Protein Accession	DNA Accession	AMR Gene Family	Drug Class	Resistance Mechanism	Donor	Milieu	Tissue	ARO_description
ODIWGS01	ARO:3003839	22	Mrx	AAS13767.1	AY522923.1	macrolide phosphotransferase (MPH)	macrolide antibiotic	antibiotic inactivation	OD8	Lumen	Duodenum	"Mrx is part of the macrolide inactivation gene cluster in Aeromonas hydrophila."
ODIWGS02	ARO:3000518	30	CRP	BAE77933.1	AP009048.1	resistance-nodulation-cell division (RND) antibiotic efflux pump	fluoroquinolone antibiotic;macrolide antibiotic;penam	antibiotic efflux	OD2	Mucosa	DescendingColon	"CRP is a global regulator that represses MdtEF multidrug efflux pump expression."
ODIWGS04	ARO:3000186	586	tet(M)	BAB82500.1	AB039845.1	tetracycline-resistant ribosomal protection protein	tetracycline antibiotic	antibiotic target protection	OD3	Lumen	AscendingColon	"Tet(M) is a ribosomal protection protein that confers tetracycline resistance. It is found on transposable DNA elements and its horizontal transfer between bacterial species has been documented."
ODIWGS04	ARO:3000988	343	TEM-126	AAT45742.1	AY628199.1	TEM beta-lactamase	cephalosporin;monobactam;penam;penem	antibiotic inactivation	OD3	Lumen	AscendingColon	"TEM-126 is an extended-spectrum beta-lactamase found in E. coli."
ODIWGS04	ARO:3003549	1031	mdtO	BAE78083.1	AP009048.1	major facilitator superfamily (MFS) antibiotic efflux pump	disinfecting agents and antiseptics;nucleoside antibiotic	antibiotic efflux	OD3	Lumen	AscendingColon	"Multidrug resistance efflux pump. Could be involved in resistance to puromycin, acriflavine and tetraphenylarsonium chloride."
ODIWGS04	ARO:3005009	27	qacE	AEH26330.1	HQ730118.1	major facilitator superfamily (MFS) antibiotic efflux pump	disinfecting agents and antiseptics	antibiotic efflux	OD3	Lumen	AscendingColon	"QacE is a resistance gene conferring resistance to antiseptics."
ODIWGS04	ARO:3000793	817	mdtB	AAC75136.1	U00096.1	resistance-nodulation-cell division (RND) antibiotic efflux pump	aminocoumarin antibiotic	antibiotic efflux	OD3	Lumen	AscendingColon	"MdtB is a transporter that forms a heteromultimer complex with MdtC to form a multidrug transporter. MdtBC is part of the MdtABC-TolC efflux complex."
ODIWGS04	ARO:3002999	173	CblA-1	ACT97415.1	GQ343019.1	CblA beta-lactamase	cephalosporin	antibiotic inactivation	OD3	Lumen	AscendingColon	"CblA-1 beta-lactamase is a class A beta-lactamase found in Bacteroides uniformis that is species-specific."
ODIWGS04	ARO:3000074	232	emrB	AAC75733.1	U00096.1	major facilitator superfamily (MFS) antibiotic efflux pump	fluoroquinolone antibiotic	antibiotic efflux	OD3	Lumen	AscendingColon	"emrB is a translocase in the emrB -TolC efflux protein in E. coli. It recognizes substrates including carbonyl cyanide m-chlorophenylhydrazone (CCCP), nalidixic acid, and thioloactomycin."
ODIWGS04	ARO:3000237	656	TolC	ACN32294.1	FJ768952.1	ATP-binding cassette (ABC) antibiotic efflux pump;major facilitator superfamily (MFS) antibiotic efflux pump;resistance-nodulation-cell division (RND) antibiotic efflux pump	aminocoumarin antibiotic;aminoglycoside antibiotic;carbapenem;cephalosporin;cephamycin;disinfecting agents and antiseptics;fluoroquinolone antibiotic;glycylcycline;macrolide antibiotic;penam;penem;peptide antibiotic;phenicol antibiotic;rifamycin antibiotic;tetracycline antibiotic	antibiotic efflux	OD3	Lumen	AscendingColon	"TolC is a protein subunit of many multidrug efflux complexes in Gram negative bacteria. It is an outer membrane efflux protein and is constitutively open. Regulation of efflux activity is often at its periplasmic entrance by other components of the efflux complex."
ODIWGS04	ARO:3000794	958	mdtC	AAC75137.1	U00096.1	resistance-nodulation-cell division (RND) antibiotic efflux pump	aminocoumarin antibiotic	antibiotic efflux	OD3	Lumen	AscendingColon	"MdtC is a transporter that forms a heteromultimer complex with MdtB to form a multidrug transporter. MdtBC is part of the MdtABC-TolC efflux complex. In the absence of MdtB, MdtC can form a homomultimer complex that results in a functioning efflux complex with a narrower drug specificity. mdtC corresponds to 3 loci in Pseudomonas aeruginosa PAO1 (gene name
ODIWGS04	ARO:3000498	14	ErmF	AAA88675.1	M17124.1	Erm 23S ribosomal RNA methyltransferase	lincosamide antibiotic;macrolide antibiotic;streptogramin A antibiotic;streptogramin B antibiotic;streptogramin antibiotic	antibiotic target alteration	OD3	Lumen	AscendingColon	"ErmF confers the MLSb phenotype."
ODIWGS04	ARO:3000795	197	mdtE	BAE77781.1	AP009048.1	resistance-nodulation-cell division (RND) antibiotic efflux pump	fluoroquinolone antibiotic;macrolide antibiotic;penam	antibiotic efflux	OD3	Lumen	AscendingColon	"MdtE is the membrane fusion protein of the MdtEF multidrug efflux complex. It shares 70% sequence similarity with AcrA."
ODIWGS04	ARO:3004683	553	aadS	AAA27459.1	M72415.1	ANT(6)	aminoglycoside antibiotic	antibiotic inactivation	OD3	Lumen	AscendingColon	"A novel Tn4551 streptomycin-resistance gene that was phenotypically silent in wild-type Bacteroides; expression could be activated by a trans-acting chromosomal mutation."
ODIWGS04	ARO:3007075	170	cph	AAA92037.1	U13078.1	capreomycin phosphotransferase	aminoglycoside antibiotic	antibiotic inactivation	OD3	Lumen	AscendingColon	"cph is a phosphotransferase that confers resistance to capreomycin."
ODIWGS04	ARO:3005057	207	tet(X5)	WP_150378267.1	NZ_CP040912.1	tetracycline inactivation enzyme	tetracycline antibiotic	antibiotic inactivation	OD3	Lumen	AscendingColon	"Tet(X5) is a tetracycline inactivating enzyme. It is a variant of tet(X)."
ODIWGS04	ARO:3000263	168	marA	BAA15221.2	AP009048.1	General Bacterial Porin with reduced permeability to beta-lactams;resistance-nodulation-cell division (RND) antibiotic efflux pump	carbapenem;cephalosporin;cephamycin;disinfecting agents and antiseptics;fluoroquinolone antibiotic;glycylcycline;monobactam;penam;penem;phenicol antibiotic;rifamycin antibiotic;tetracycline antibiotic	antibiotic efflux;reduced permeability to antibiotic	OD3	Lumen	AscendingColon	"In the presence of antibiotic stress, E. coli overexpresses the global activator protein MarA, which besides inducing MDR efflux pump AcrAB, also down- regulates synthesis of the porin OmpF."
ODIWGS04	ARO:3005098	18	qacL	AAZ42322.1	DQ149925.1	small multidrug resistance (SMR) antibiotic efflux pump	disinfecting agents and antiseptics	antibiotic efflux	OD3	Lumen	AscendingColon	"A subunit of the qac multidrug efflux pump in Vibrio cholerae."
ODIWGS04	ARO:3000796	1218	mdtF	AAC76539.1	U00096.1	resistance-nodulation-cell division (RND) antibiotic efflux pump	fluoroquinolone antibiotic;macrolide antibiotic;penam	antibiotic efflux	OD3	Lumen	AscendingColon	"MdtF is the multidrug inner membrane transporter for the MdtEF-TolC efflux complex."
ODIWGS04	ARO:3000830	655	cpxA	BAB38260.1	BA000007.3	resistance-nodulation-cell division (RND) antibiotic efflux pump	aminocoumarin antibiotic;aminoglycoside antibiotic	antibiotic efflux	OD3	Lumen	AscendingColon	"CpxA is a membrane-localized sensor kinase that is activated by envelope stress. It starts a kinase cascade that activates CpxR, which promotes efflux complex expression."
ODIWGS04	ARO:3000556	1359	tet(44)	CBH51823.1	FN594949.1	tetracycline-resistant ribosomal protection protein	tetracycline antibiotic	antibiotic target protection	OD3	Lumen	AscendingColon	"Tet44 is a tetracycline resistance gene found in Campylobacter fetus, and binds to the ribosome to confer antibiotic resistance as a ribosomal protection protein."
ODIWGS04	ARO:3007120	31	tet(O/M/O)	AAR29485.1	AY394560.1	tetracycline-resistant ribosomal protection protein	tetracycline antibiotic	antibiotic target protection	OD3	Lumen	AscendingColon	"Tet(O/M/O) is a mosaic tetracycline resistance gene and ribosomal protection protein."
ODIWGS04	ARO:3003577	2699	ugd	AAC75089.1	U00096.1	pmr phosphoethanolamine transferase	peptide antibiotic	antibiotic target alteration	OD3	Lumen	AscendingColon	"PmrE is required for the synthesis and transfer of 4-amino-4-deoxy-L-arabinose (Ara4N) to Lipid A, which allows gram-negative bacteria to resist the antimicrobial activity of cationic antimicrobial peptides and antibiotics such as polymyxin."
ODIWGS04	ARO:3004442	166	tet(W/N/W)	AMP42147.1	KU736867.1	tetracycline-resistant ribosomal protection protein	tetracycline antibiotic	antibiotic target protection	OD3	Lumen	AscendingColon	"tet(W/N/W) is a mosaic tetracycline resistance gene and ribosomal protection protein."
ODIWGS04	ARO:3000194	337	tet(W)	CAA10975.1	AJ222769.3	tetracycline-resistant ribosomal protection protein	tetracycline antibiotic	antibiotic target protection	OD3	Lumen	AscendingColon	"Tet(W) is a ribosomal protection protein. It is associated with both conjugative and non conjugative DNA and has been found strains of Clostridioides difficile."
ODIWGS04	ARO:3003950	2514	msbA	AAC74000.1	U00096.3	ATP-binding cassette (ABC) antibiotic efflux pump	nitroimidazole antibiotic	antibiotic efflux	OD3	Lumen	AscendingColon	"MsbA is a multidrug resistance transporter homolog from E. coli and belongs to a superfamily of transporters that contain an adenosine triphosphate (ATP) binding cassette (ABC) which is also called a nucleotide-binding domain (NBD). MsbA is a member of the MDR-ABC transporter group by sequence homology. MsbA transports lipid A, a major component of the bacterial outer cell membrane, and is the o…
ODIWGS04	ARO:3004719	390	tet(X3)	QBQ85438.1	MK134375.1	tetracycline inactivation enzyme	glycylcycline;tetracycline antibiotic	antibiotic inactivation	OD3	Lumen	AscendingColon	"A tetracyline resistance gene located on an approximately 300-kb plasmid, designated p47AB. It inactivates all tetracyclines, including tigecycline, eravacycline, and omadacycline.Adjacent to insertion sequence ISVsa3 on the conjugative plasmid."
ODIWGS04	ARO:3004659	122	Mef(En2)	AAF74725.1	AF251288.1	major facilitator superfamily (MFS) antibiotic efflux pump	macrolide antibiotic	antibiotic efflux	OD3	Lumen	AscendingColon	"NBU2-encoded resistance gene. An MefE homolog in Bacteroides species. Macrolide efflux MFS transporter."
ODIWGS04	ARO:3002871	138	tet(37)	AAN28721.1	AF540889.1	tetracycline inactivation enzyme	tetracycline antibiotic	antibiotic inactivation	OD3	Lumen	AscendingColon	"tet(37) is a chromosome-encoded oxidoreductase isolated from an uncultured bacterium that confers resistance to tetracycline."
ODIWGS04	ARO:3007047	34	mefH	QQM99829.1	MW269960.1	major facilitator superfamily (MFS) antibiotic efflux pump	macrolide antibiotic	antibiotic efflux	OD3	Lumen	AscendingColon	"mefH is an mef efflux pump protein."
ODIWGS04	ARO:3000491	730	acrD	BAA16344.1	AP009048.1	resistance-nodulation-cell division (RND) antibiotic efflux pump	aminoglycoside antibiotic	antibiotic efflux	OD3	Lumen	AscendingColon	"AcrD is an aminoglycoside efflux pump expressed in E. coli. Its expression can be induced by indole, and is regulated by baeRS and cpxAR."
ODIWGS04	ARO:3002578	65	AAC(6')-Ib7	AKN19287.1	KR091911.1	AAC(6')	aminoglycoside antibiotic	antibiotic inactivation	OD3	Lumen	AscendingColon	"AAC(6')-Ib7 is a plasmid-encoded aminoglycoside acetyltransferase in E. cloacae and C. freundii."
ODIWGS04	ARO:3000191	2882	tet(Q)	CAA79727.1	Z21523.1	tetracycline-resistant ribosomal protection protein	tetracycline antibiotic	antibiotic target protection	OD3	Lumen	AscendingColon	"Tet(Q) is a ribosomal protection protein. Its gene is associated with a conjugative transposon and has been found in both Gram-positive and Gram-negative bacteria."
ODIWGS04	ARO:3002837	25	lnuC	AAY32951.1	AY928180.1	lincosamide nucleotidyltransferase (LNU)	lincosamide antibiotic	antibiotic inactivation	OD3	Lumen	AscendingColon	"lnuC is a transposon-mediated nucleotidyltransferase found in Streptococcus agalactiae."
ODIWGS04	ARO:3003576	517	eptA	BAE78116.1	AP009048.1	pmr phosphoethanolamine transferase	peptide antibiotic	antibiotic target alteration	OD3	Lumen	AscendingColon	"PmrC mediates the modification of Lipid A by the addition of 4-amino-4-deoxy-L-arabinose (L-Ara4N) and phosphoethanolamine, resulting in a less negative cell membrane and decreased binding of polymyxin B."
ODIWGS04	ARO:3000412	369	sul2	AAL59753.1	AY055428.1	sulfonamide resistant sul	sulfonamide antibiotic;sulfone antibiotic	antibiotic target replacement	OD3	Lumen	AscendingColon	"Sul2 is a sulfonamide resistant dihydropteroate synthase of Gram-negative bacteria, usually found on small plasmids."
ODIWGS04	ARO:3000768	21	abeS	ACJ59254.1	CP001172.1	small multidrug resistance (SMR) antibiotic efflux pump	aminocoumarin antibiotic;macrolide antibiotic	antibiotic efflux	OD3	Lumen	AscendingColon	"AbeS in an efflux pump of the SMR family of transporters found in Acinetobacter baumannii."
ODIWGS04	ARO:3002867	26	dfrF	AAD01868.1	AF028812.1	trimethoprim resistant dihydrofolate reductase dfr	diaminopyrimidine antibiotic	antibiotic target replacement	OD3	Lumen	AscendingColon	"dfrF is a chromosome-encoded dihydrofolate reductase found in Streptococcus pyogenes."
ODIWGS04	ARO:3007121	50	tet(O/W)	AAR29969.1	AY485122.1	tetracycline-resistant ribosomal protection protein	tetracycline antibiotic	antibiotic target protection	OD3	Lumen	AscendingColon	"Tet(O/W) is a mosaic tetracycline resistance gene and ribosomal protection protein."
ODIWGS04	ARO:3000828	1333	baeR	BAA15935.1	AP009048.1	resistance-nodulation-cell division (RND) antibiotic efflux pump	aminocoumarin antibiotic;aminoglycoside antibiotic	antibiotic efflux	OD3	Lumen	AscendingColon	"BaeR is a response regulator that promotes the expression of MdtABC and AcrD efflux complexes."
ODIWGS04	ARO:3000502	867	AcrF	AAC76298.1	U00096.1	resistance-nodulation-cell division (RND) antibiotic efflux pump	cephalosporin;cephamycin;fluoroquinolone antibiotic;penam	antibiotic efflux	OD3	Lumen	AscendingColon	"AcrF is a inner membrane transporter, similar to AcrB."
ODIWGS04	ARO:3000518	239	CRP	BAE77933.1	AP009048.1	resistance-nodulation-cell division (RND) antibiotic efflux pump	fluoroquinolone antibiotic;macrolide antibiotic;penam	antibiotic efflux	OD3	Lumen	AscendingColon	"CRP is a global regulator that represses MdtEF multidrug efflux pump expression."
ODIWGS04	ARO:3000254	383	emrY	BAA11237.1	D78168.1	major facilitator superfamily (MFS) antibiotic efflux pump	tetracycline antibiotic	antibiotic efflux	OD3	Lumen	AscendingColon	"emrY is a multidrug transport that moves substrates across the inner membrane of the Gram-negative E. coli. It is a homolog of emrB."
ODIWGS04	ARO:3000656	178	AcrS	AAC76296.1	U00096.1	resistance-nodulation-cell division (RND) antibiotic efflux pump	cephalosporin;cephamycin;disinfecting agents and antiseptics;fluoroquinolone antibiotic;glycylcycline;penam;phenicol antibiotic;rifamycin antibiotic;tetracycline antibiotic	antibiotic efflux	OD3	Lumen	AscendingColon	"AcrS is a repressor of the AcrAB efflux complex and is associated with the expression of AcrEF. AcrS is believed to regulate a switch between AcrAB and AcrEF efflux."
ODIWGS04	ARO:3000196	964	tet(32)	ACH87088.1	EU722333.1	tetracycline-resistant ribosomal protection protein	tetracycline antibiotic	antibiotic target protection	OD3	Lumen	AscendingColon	"Tet(32) is a tetracycline resistance gene similar to Tet(O), and binds to the ribosome to confer tetracycline resistance as a ribosomal protection protein."
ODIWGS04	ARO:3002660	363	APH(6)-Id	AAC23556.1	AF024602.1	APH(6)	aminoglycoside antibiotic	antibiotic inactivation	OD3	Lumen	AscendingColon	"APH(6)-Id is an aminoglycoside phosphotransferase encoded by plasmids, integrative conjugative elements and chromosomal genomic islands in K. pneumoniae, Salmonella spp., E. coli, Shigella flexneri, Providencia alcalifaciens, Pseudomonas spp., V. cholerae, Edwardsiella tarda, Pasteurella multocida and Aeromonas bestiarum."
ODIWGS04	ARO:3000567	49	tet(40)	CAM12479.1	AM419751.1	major facilitator superfamily (MFS) antibiotic efflux pump	tetracycline antibiotic	antibiotic efflux	OD3	Lumen	AscendingColon	"Tet40 is a tetracycline efflux pump found in the Gram-positive Clostridium. It is similar to tetA(P)."
ODIWGS04	ARO:3001329	360	mdtG	ABV18113.1	CP000800.1	major facilitator superfamily (MFS) antibiotic efflux pump	phosphonic acid antibiotic	antibiotic efflux	OD3	Lumen	AscendingColon	"The MdtG protein, also named YceE, appears to be a member of the major facilitator superfamily of transporters, and it has been reported, when overexpressed, to increase fosfomycin and deoxycholate resistances. mdtG is a member of the marA-soxS-rob regulon."
ODIWGS04	ARO:3000832	607	evgA	BAB36671.1	BA000007.3	major facilitator superfamily (MFS) antibiotic efflux pump;resistance-nodulation-cell division (RND) antibiotic efflux pump	fluoroquinolone antibiotic;macrolide antibiotic;penam;tetracycline antibiotic	antibiotic efflux	OD3	Lumen	AscendingColon	"EvgA, when phosphorylated, is a positive regulator for efflux protein complexes emrKY and mdtEF. While usually phosphorylated in a EvgS dependent manner, it can be phosphorylated in the absence of EvgS when overexpressed."
ODIWGS04	ARO:3004043	77	Ecol_acrA	AAC73565.1	U00096.3	resistance-nodulation-cell division (RND) antibiotic efflux pump	cephalosporin;disinfecting agents and antiseptics;fluoroquinolone antibiotic;glycylcycline;penam;phenicol antibiotic;rifamycin antibiotic;tetracycline antibiotic	antibiotic efflux	OD3	Lumen	AscendingColon	"AcrA is a subunit of the AcrAB-TolC multidrug efflux system that in E. coli."
ODIWGS04	ARO:3003548	375	mdtN	BAE78084.1	AP009048.1	major facilitator superfamily (MFS) antibiotic efflux pump	disinfecting agents and antiseptics;nucleoside antibiotic	antibiotic efflux	OD3	Lumen	AscendingColon	"Multidrug resistance efflux pump. Could be involved in resistance to puromycin, acriflavine and tetraphenylarsonium chloride."
ODIWGS04	ARO:3003843	279	leuO	VWQ00850.1	LR730402.1	major facilitator superfamily (MFS) antibiotic efflux pump	disinfecting agents and antiseptics;nucleoside antibiotic	antibiotic efflux	OD3	Lumen	AscendingColon	"leuO, a LysR family transcription factor, exists in a wide variety of bacteria of the family Enterobacteriaceae and is involved in the regulation of as yet unidentified genes affecting the stress response and pathogenesis expression. LeuO is also an activator of the MdtNOP efflux pump."
ODIWGS04	ARO:3003002	53	CfxA2	AAD23513.1	AF118110.1	CfxA beta-lactamase	cephamycin	antibiotic inactivation	OD3	Lumen	AscendingColon	"CfxA2 beta-lactamase is a class A beta-lactamase found in Prevotella intermedia."
ODIWGS04	ARO:3004253	209	vanU_in_vanG_cl	ABA71726.1	DQ212986.1	glycopeptide resistance gene cluster;vanU	glycopeptide antibiotic	antibiotic target alteration	OD3	Lumen	AscendingColon	"Also known as vanUG, is a vanG variant found in the vanG gene cluster."
ODIWGS04	ARO:3000833	2391	evgS	AAC75429.1	U00096.1	major facilitator superfamily (MFS) antibiotic efflux pump;resistance-nodulation-cell division (RND) antibiotic efflux pump	fluoroquinolone antibiotic;macrolide antibiotic;penam;tetracycline antibiotic	antibiotic efflux	OD3	Lumen	AscendingColon	"EvgS is a sensor protein that phosphorylates the regulatory protein EvgA. evgS corresponds to 1 locus in Pseudomonas aeruginosa PAO1 and 1 locus in Pseudomonas aeruginosa LESB58."
ODIWGS04	ARO:3004720	21	tet(X4)	QBQ69719.1	MK134376.1	tetracycline inactivation enzyme	glycylcycline;tetracycline antibiotic	antibiotic inactivation	OD3	Lumen	AscendingColon	"A tetracyline resistance gene located on an approximately 180-kb plasmid, designated p47EC. It inactivates all tetracyclines, including tigecycline, eravacycline, and omadacycline.Adjacent to insertion sequence ISVsa3 on the conjugative plasmid."
ODIWGS04	ARO:3003578	642	PmrF	AAC75314.1	U00096.1	pmr phosphoethanolamine transferase	peptide antibiotic	antibiotic target alteration	OD3	Lumen	AscendingColon	"PmrF is required for the synthesis and transfer of 4-amino-4-deoxy-L-arabinose (Ara4N) to Lipid A, which allows gram-negative bacteria to resist the antimicrobial activity of cationic antimicrobial peptides and antibiotics such as polymyxin. pmrF corresponds to 1 locus in Pseudomonas aeruginosa PAO1 and 1 locus in Pseudomonas aeruginosa LESB58."
ODIWGS04	ARO:3007122	223	tet(O/W/32/O)	ABF69686.1	DQ525023.1	tetracycline-resistant ribosomal protection protein	tetracycline antibiotic	antibiotic target protection	OD3	Lumen	AscendingColon	"Tet(O/W/32/O) is a mosaic tetracycline resistance gene and ribosomal protection protein."
ODIWGS04	ARO:3000516	147	emrR	AAC75731.1	U00096.3	major facilitator superfamily (MFS) antibiotic efflux pump	fluoroquinolone antibiotic	antibiotic efflux	OD3	Lumen	AscendingColon	"EmrR is a negative regulator for the EmrAB-TolC multidrug efflux pump in E. coli. Mutations lead to EmrAB-TolC overexpression."
ODIWGS04	ARO:3000205	290	tet(X)	AAA27471.1	M37699.1	tetracycline inactivation enzyme	glycylcycline;tetracycline antibiotic	antibiotic inactivation	OD3	Lumen	AscendingColon	"Tet(X) is a flavin-dependent monooxygenase conferring resistance to tetracycline antibiotics. Tet(X) hydroxylates position 11a of the tetraketide group thus inactivating the antibiotic."
ODIWGS04	ARO:3000206	335	emrK	BAA11236.1	D78168.1	major facilitator superfamily (MFS) antibiotic efflux pump	tetracycline antibiotic	antibiotic efflux	OD3	Lumen	AscendingColon	"emrK is a membrane fusion protein that is a homolog of EmrA. Together with the inner membrane transporter EmrY and the outer membrane channel TolC, it mediates multidrug efflux."
ODIWGS04	ARO:3006874	14	EC-13	WP_063860228.1	NG_049079.1	EC beta-lactamase	cephalosporin	antibiotic inactivation	OD3	Lumen	AscendingColon	"EC-13 is a EC beta-lactamase."
ODIWGS04	ARO:3005166	702	tet(X1)	CAC47933.1	AJ311171.1	tetracycline inactivation enzyme	tetracycline antibiotic	antibiotic inactivation	OD3	Lumen	AscendingColon	"Tetracycline resistance gene tet(X) ortholog described by Fang et al. 2020."
ODIWGS04	ARO:3002639	301	APH(3'')-Ib	ABK33456.1	AF313472.2	APH(3'')	aminoglycoside antibiotic	antibiotic inactivation	OD3	Lumen	AscendingColon	"APH(3'')-Ib is an aminoglycoside phosphotransferase encoded by plasmids, transposons, integrative conjugative elements and chromosomes in Enterobacteriaceae and Pseudomonas spp."
ODIWGS04	ARO:3003550	723	mdtP	BAE78082.1	AP009048.1	major facilitator superfamily (MFS) antibiotic efflux pump	disinfecting agents and antiseptics;nucleoside antibiotic	antibiotic efflux	OD3	Lumen	AscendingColon	"Multidrug resistance efflux pump. Could be involved in resistance to puromycin, acriflavine and tetraphenylarsonium chloride."
ODIWGS04	ARO:3003952	685	YojI	AAC75271.1	U00096.3	ATP-binding cassette (ABC) antibiotic efflux pump	peptide antibiotic	antibiotic efflux	OD3	Lumen	AscendingColon	"YojI mediates resistance to the peptide antibiotic microcin J25 when it is expressed from a multicopy vector. YojI is capable of pumping out microcin molecules. The outer membrane protein TolC in addition to YojI is required for export of microcin J25 out of the cell. Microcin J25 is thus the first known substrate for YojI."
ODIWGS04	ARO:3002986	768	bacA	AAC76093.1	U00096.3	undecaprenyl pyrophosphate related proteins	peptide antibiotic	antibiotic target alteration	OD3	Lumen	AscendingColon	"The bacA gene product (BacA) recycles undecaprenyl pyrophosphate during cell wall biosynthesis which confers resistance to bacitracin."
ODIWGS04	ARO:3000216	650	acrB	AAC73564.1	U00096.3	resistance-nodulation-cell division (RND) antibiotic efflux pump	cephalosporin;disinfecting agents and antiseptics;fluoroquinolone antibiotic;glycylcycline;penam;phenicol antibiotic;rifamycin antibiotic;tetracycline antibiotic	antibiotic efflux	OD3	Lumen	AscendingColon	"Protein subunit of AcrA-AcrB-TolC multidrug efflux complex. AcrB functions as a herterotrimer which forms the inner membrane component and is primarily responsible for substrate recognition and energy transduction by acting as a drug/proton antiporter."
ODIWGS04	ARO:3005069	63	rsmA	AAC16242.1	AF061757.1	resistance-nodulation-cell division (RND) antibiotic efflux pump	diaminopyrimidine antibiotic;fluoroquinolone antibiotic;phenicol antibiotic	antibiotic efflux	OD3	Lumen	AscendingColon	"rsmA is a gene that regulates virulence of Pseudomonas aeruginosa. However, its negative effect on MexEF-OprN overexpression has been noted to confer resistance to various antibiotics. It's Escherichia coli homolog is csrA."
ODIWGS04	ARO:3002628	29	aad(6)	AAU10334.1	AY712687.1	ANT(6)	aminoglycoside antibiotic	antibiotic inactivation	OD3	Lumen	AscendingColon	"ANT(6)-Ia/aad(6) is a plasmid-encoded aminoglycoside nucleotidyltransferase gene in E. faecalis and Streptococcus oralis."
ODIWGS04	ARO:3000190	497	tet(O)	AAA23033.2	M18896.2	tetracycline-resistant ribosomal protection protein	tetracycline antibiotic	antibiotic target protection	OD3	Lumen	AscendingColon	"Tet(O) is a ribosomal protection protein. It is associated with conjugative plasmids."
ODIWGS04	ARO:3003838	268	gadW	ANK04027.1	CP015085.1	resistance-nodulation-cell division (RND) antibiotic efflux pump	fluoroquinolone antibiotic;macrolide antibiotic;penam	antibiotic efflux	OD3	Lumen	AscendingColon	"GadW is an AraC-family regulator that promotes mdtEF expression to confer multidrug resistance. GadW inhibits GadX-dependent activation. GadW clearly represses gadX and, in situations where GadX is missing, activates gadA and gadBC."
ODIWGS04	ARO:3004583	79	Kpne_KpnF	BAH63252.1	AP006725.1	small multidrug resistance (SMR) antibiotic efflux pump	aminoglycoside antibiotic;cephalosporin;disinfecting agents and antiseptics;macrolide antibiotic;peptide antibiotic;rifamycin antibiotic;tetracycline antibiotic	antibiotic efflux	OD3	Lumen	AscendingColon	"KpnF subunit of KpnEF resembles EbrAB from E. coli. Mutation in KpnEF resulted in increased susceptibility to cefepime, ceftriaxon, colistin, erythromycin, rifampin, tetracycline, and streptomycin as well as enhanced sensitivity toward sodium dodecyl sulfate, deoxycholate, dyes, benzalkonium chloride, chlorhexidine, and triclosan."
ODIWGS04	ARO:3000499	146	AcrE	AAC76297.1	U00096.1	resistance-nodulation-cell division (RND) antibiotic efflux pump	cephalosporin;cephamycin;fluoroquinolone antibiotic;penam	antibiotic efflux	OD3	Lumen	AscendingColon	"AcrE is a membrane fusion protein, similar to AcrA."
ODIWGS04	ARO:3002647	21	APH(3')-IIIa	AGV10830.1	CP004067.1	APH(3')	aminoglycoside antibiotic	antibiotic inactivation	OD3	Lumen	AscendingColon	"APH(3')-IIIa is a plasmid-encoded aminoglycoside phosphotransferase in S. aureus and Enterococcus spp."
ODIWGS04	ARO:3003559	149	cepA	AAA21532.1	U05883.1	CepA beta-lactamase	cephalosporin	antibiotic inactivation	OD3	Lumen	AscendingColon	"A beta-lactamase found in Bacteroides fragilis producing either low or high levels of the endogenous cephalosporinase activity."
ODIWGS04	ARO:3000027	104	emrA	BAA16547.1	AP009048.1	major facilitator superfamily (MFS) antibiotic efflux pump	fluoroquinolone antibiotic	antibiotic efflux	OD3	Lumen	AscendingColon	"EmrA is a membrane fusion protein, providing an efflux pathway with EmrB and TolC between the inner and outer membranes of E. coli, a Gram-negative bacterium."
ODIWGS04	ARO:3007119	223	tet(O/32/O)	CAC41371.2	AJ295238.3	tetracycline-resistant ribosomal protection protein	tetracycline antibiotic	antibiotic target protection	OD3	Lumen	AscendingColon	"Tet(O/32/O) is a mosaic tetracycline resistance gene and ribosomal protection protein."
ODIWGS04	ARO:3000316	3115	mphA	BAA03776.1	D16251.1	macrolide phosphotransferase (MPH)	macrolide antibiotic	antibiotic inactivation	OD3	Lumen	AscendingColon	"The mphA gene encodes for resistance enzyme MPH(2')-I which preferentially inactivate 14-membered macrolides (e.g.erythromycin, telithromycin, roxithromycin) over 16-membered macrolides (e.g.tylosin, spiramycin). It phosphorylates macrolides at 2'-OH hydroxyl of desosamine sugar of macrolides in a GTP-dependent manner."
ODIWGS04	ARO:3003839	7429	Mrx	AAS13767.1	AY522923.1	macrolide phosphotransferase (MPH)	macrolide antibiotic	antibiotic inactivation	OD3	Lumen	AscendingColon	"Mrx is part of the macrolide inactivation gene cluster in Aeromonas hydrophila."
ODIWGS04	ARO:3005040	27	YajC	TKW44661.1	VAOQ01003483.1	resistance-nodulation-cell division (RND) antibiotic efflux pump	cephalosporin;disinfecting agents and antiseptics;fluoroquinolone antibiotic;glycopeptide antibiotic;glycylcycline;oxazolidinone antibiotic;penam;phenicol antibiotic;rifamycin antibiotic;tetracycline antibiotic	antibiotic efflux	OD3	Lumen	AscendingColon	"YajC interacts with the AcrAB-TolC efflux pump in a way that in uncharacterized but is shown to grant increased fitness in the presence of linezolid, rifampicin, and vancomycin."
ODIWGS04	ARO:3001216	465	mdtH	AAC74149.2	U00096.1	major facilitator superfamily (MFS) antibiotic efflux pump	fluoroquinolone antibiotic	antibiotic efflux	OD3	Lumen	AscendingColon	"Multidrug resistance protein MdtH."
ODIWGS04	ARO:3000676	229	H-NS	BAB35162.1	BA000007.3	major facilitator superfamily (MFS) antibiotic efflux pump;resistance-nodulation-cell division (RND) antibiotic efflux pump	cephalosporin;cephamycin;fluoroquinolone antibiotic;macrolide antibiotic;penam;tetracycline antibiotic	antibiotic efflux	OD3	Lumen	AscendingColon	"H-NS is a histone-like protein involved in global gene regulation in Gram-negative bacteria. It is a repressor of the membrane fusion protein genes acrE, mdtE, and emrK as well as nearby genes of many RND-type multidrug exporters."
ODIWGS04	ARO:3000166	45	tet(B)	BAC67143.1	AB089595.1	major facilitator superfamily (MFS) antibiotic efflux pump	tetracycline antibiotic	antibiotic efflux	OD3	Lumen	AscendingColon	"Tet(B) is a tetracycline efflux protein expressed in many Gram-negative bacteria. It confers resistance to tetracycline, doxycycline, and minocycline, but not tigecycline."
ODIWGS05	ARO:3000237	39	TolC	ACN32294.1	FJ768952.1	ATP-binding cassette (ABC) antibiotic efflux pump;major facilitator superfamily (MFS) antibiotic efflux pump;resistance-nodulation-cell division (RND) antibiotic efflux pump	aminocoumarin antibiotic;aminoglycoside antibiotic;carbapenem;cephalosporin;cephamycin;disinfecting agents and antiseptics;fluoroquinolone antibiotic;glycylcycline;macrolide antibiotic;penam;penem;peptide antibiotic;phenicol antibiotic;rifamycin antibiotic;tetracycline antibiotic	antibiotic efflux	OD7	Mucosa	AscendingColon	"TolC is a protein subunit of many multidrug efflux complexes in Gram negative bacteria. It is an outer membrane efflux protein and is constitutively open. Regulation of efflux activity is often at its periplasmic entrance by other components of the efflux complex."
ODIWGS05	ARO:3004683	20	aadS	AAA27459.1	M72415.1	ANT(6)	aminoglycoside antibiotic	antibiotic inactivation	OD7	Mucosa	AscendingColon	"A novel Tn4551 streptomycin-resistance gene that was phenotypically silent in wild-type Bacteroides; expression could be activated by a trans-acting chromosomal mutation."
ODIWGS05	ARO:3000796	125	mdtF	AAC76539.1	U00096.1	resistance-nodulation-cell division (RND) antibiotic efflux pump	fluoroquinolone antibiotic;macrolide antibiotic;penam	antibiotic efflux	OD7	Mucosa	AscendingColon	"MdtF is the multidrug inner membrane transporter for the MdtEF-TolC efflux complex."
ODIWGS05	ARO:3000830	17	cpxA	BAB38260.1	BA000007.3	resistance-nodulation-cell division (RND) antibiotic efflux pump	aminocoumarin antibiotic;aminoglycoside antibiotic	antibiotic efflux	OD7	Mucosa	AscendingColon	"CpxA is a membrane-localized sensor kinase that is activated by envelope stress. It starts a kinase cascade that activates CpxR, which promotes efflux complex expression."
ODIWGS05	ARO:3000556	151	tet(44)	CBH51823.1	FN594949.1	tetracycline-resistant ribosomal protection protein	tetracycline antibiotic	antibiotic target protection	OD7	Mucosa	AscendingColon	"Tet44 is a tetracycline resistance gene found in Campylobacter fetus, and binds to the ribosome to confer antibiotic resistance as a ribosomal protection protein."
ODIWGS05	ARO:3004442	27	tet(W/N/W)	AMP42147.1	KU736867.1	tetracycline-resistant ribosomal protection protein	tetracycline antibiotic	antibiotic target protection	OD7	Mucosa	AscendingColon	"tet(W/N/W) is a mosaic tetracycline resistance gene and ribosomal protection protein."
ODIWGS05	ARO:3000194	50	tet(W)	CAA10975.1	AJ222769.3	tetracycline-resistant ribosomal protection protein	tetracycline antibiotic	antibiotic target protection	OD7	Mucosa	AscendingColon	"Tet(W) is a ribosomal protection protein. It is associated with both conjugative and non conjugative DNA and has been found strains of Clostridioides difficile."
ODIWGS05	ARO:3002871	43	tet(37)	AAN28721.1	AF540889.1	tetracycline inactivation enzyme	tetracycline antibiotic	antibiotic inactivation	OD7	Mucosa	AscendingColon	"tet(37) is a chromosome-encoded oxidoreductase isolated from an uncultured bacterium that confers resistance to tetracycline."
ODIWGS05	ARO:3000191	162	tet(Q)	CAA79727.1	Z21523.1	tetracycline-resistant ribosomal protection protein	tetracycline antibiotic	antibiotic target protection	OD7	Mucosa	AscendingColon	"Tet(Q) is a ribosomal protection protein. Its gene is associated with a conjugative transposon and has been found in both Gram-positive and Gram-negative bacteria."
ODIWGS05	ARO:3004480	1355	Bado_rpoB_RIF	WP_041777404.1	NC_008618.1	rifamycin-resistant beta-subunit of RNA polymerase (rpoB)	peptide antibiotic;rifamycin antibiotic	antibiotic target alteration;antibiotic target replacement	OD7	Mucosa	AscendingColon	"Bifidobacterium are antibiotic resistant probiotics are prescribed to upkeep the population beneficial bacteria in the gut microbiome. However, horizontal gene transfer among gut microbes could create harmful antibiotic-resistant pathogenic bacteria, such as Mycobacterium tuberculosis. Lokesh et al. analyzed Bifidobacterium antitubercular drug resistance and mutations in rpoB. They found that B.…
ODIWGS05	ARO:3002882	593	lmrD	AYV52072.1	CP033607.1	ATP-binding cassette (ABC) antibiotic efflux pump	lincosamide antibiotic	antibiotic efflux	OD7	Mucosa	AscendingColon	"lmrD is a chromosomally-encoded efflux pump that confers resistance to lincosamides in Streptomyces lincolnensis and Lactococcus lactis. It can dimerize with lmrC."
ODIWGS05	ARO:3000196	89	tet(32)	ACH87088.1	EU722333.1	tetracycline-resistant ribosomal protection protein	tetracycline antibiotic	antibiotic target protection	OD7	Mucosa	AscendingColon	"Tet(32) is a tetracycline resistance gene similar to Tet(O), and binds to the ribosome to confer tetracycline resistance as a ribosomal protection protein."
ODIWGS05	ARO:3000567	49	tet(40)	CAM12479.1	AM419751.1	major facilitator superfamily (MFS) antibiotic efflux pump	tetracycline antibiotic	antibiotic efflux	OD7	Mucosa	AscendingColon	"Tet40 is a tetracycline efflux pump found in the Gram-positive Clostridium. It is similar to tetA(P)."
ODIWGS05	ARO:3004043	13	Ecol_acrA	AAC73565.1	U00096.3	resistance-nodulation-cell division (RND) antibiotic efflux pump	cephalosporin;disinfecting agents and antiseptics;fluoroquinolone antibiotic;glycylcycline;penam;phenicol antibiotic;rifamycin antibiotic;tetracycline antibiotic	antibiotic efflux	OD7	Mucosa	AscendingColon	"AcrA is a subunit of the AcrAB-TolC multidrug efflux system that in E. coli."
ODIWGS05	ARO:3000833	172	evgS	AAC75429.1	U00096.1	major facilitator superfamily (MFS) antibiotic efflux pump;resistance-nodulation-cell division (RND) antibiotic efflux pump	fluoroquinolone antibiotic;macrolide antibiotic;penam;tetracycline antibiotic	antibiotic efflux	OD7	Mucosa	AscendingColon	"EvgS is a sensor protein that phosphorylates the regulatory protein EvgA. evgS corresponds to 1 locus in Pseudomonas aeruginosa PAO1 and 1 locus in Pseudomonas aeruginosa LESB58."
ODIWGS05	ARO:3007122	14	tet(O/W/32/O)	ABF69686.1	DQ525023.1	tetracycline-resistant ribosomal protection protein	tetracycline antibiotic	antibiotic target protection	OD7	Mucosa	AscendingColon	"Tet(O/W/32/O) is a mosaic tetracycline resistance gene and ribosomal protection protein."
ODIWGS05	ARO:3000205	34	tet(X)	AAA27471.1	M37699.1	tetracycline inactivation enzyme	glycylcycline;tetracycline antibiotic	antibiotic inactivation	OD7	Mucosa	AscendingColon	"Tet(X) is a flavin-dependent monooxygenase conferring resistance to tetracycline antibiotics. Tet(X) hydroxylates position 11a of the tetraketide group thus inactivating the antibiotic."
ODIWGS05	ARO:3003063	21	ykkC	CAB13166.1	AL009126.1	small multidrug resistance (SMR) antibiotic efflux pump	aminoglycoside antibiotic;phenicol antibiotic;tetracycline antibiotic	antibiotic efflux	OD7	Mucosa	AscendingColon	"ykkC is an SMR-type protein that is a subunit of the ykkCD efflux pump."
ODIWGS05	ARO:3005166	64	tet(X1)	CAC47933.1	AJ311171.1	tetracycline inactivation enzyme	tetracycline antibiotic	antibiotic inactivation	OD7	Mucosa	AscendingColon	"Tetracycline resistance gene tet(X) ortholog described by Fang et al. 2020."
ODIWGS05	ARO:3002986	169	bacA	AAC76093.1	U00096.3	undecaprenyl pyrophosphate related proteins	peptide antibiotic	antibiotic target alteration	OD7	Mucosa	AscendingColon	"The bacA gene product (BacA) recycles undecaprenyl pyrophosphate during cell wall biosynthesis which confers resistance to bacitracin."
ODIWGS05	ARO:3000216	67	acrB	AAC73564.1	U00096.3	resistance-nodulation-cell division (RND) antibiotic efflux pump	cephalosporin;disinfecting agents and antiseptics;fluoroquinolone antibiotic;glycylcycline;penam;phenicol antibiotic;rifamycin antibiotic;tetracycline antibiotic	antibiotic efflux	OD7	Mucosa	AscendingColon	"Protein subunit of AcrA-AcrB-TolC multidrug efflux complex. AcrB functions as a herterotrimer which forms the inner membrane component and is primarily responsible for substrate recognition and energy transduction by acting as a drug/proton antiporter."
ODIWGS05	ARO:3000190	39	tet(O)	AAA23033.2	M18896.2	tetracycline-resistant ribosomal protection protein	tetracycline antibiotic	antibiotic target protection	OD7	Mucosa	AscendingColon	"Tet(O) is a ribosomal protection protein. It is associated with conjugative plasmids."
ODIWGS05	ARO:3000316	153	mphA	BAA03776.1	D16251.1	macrolide phosphotransferase (MPH)	macrolide antibiotic	antibiotic inactivation	OD7	Mucosa	AscendingColon	"The mphA gene encodes for resistance enzyme MPH(2')-I which preferentially inactivate 14-membered macrolides (e.g.erythromycin, telithromycin, roxithromycin) over 16-membered macrolides (e.g.tylosin, spiramycin). It phosphorylates macrolides at 2'-OH hydroxyl of desosamine sugar of macrolides in a GTP-dependent manner."
ODIWGS05	ARO:3003839	288	Mrx	AAS13767.1	AY522923.1	macrolide phosphotransferase (MPH)	macrolide antibiotic	antibiotic inactivation	OD7	Mucosa	AscendingColon	"Mrx is part of the macrolide inactivation gene cluster in Aeromonas hydrophila."
ODIWGS07	ARO:3003905	42	ANT(4')-Ib	ADA62098.1	GQ900432.1	ANT(4')	aminoglycoside antibiotic	antibiotic inactivation	OD4	Lumen	AscendingColon	"Aminoglycoside nucleotidyltransferase sequence from Staphylococcus aureus plasmid."
ODIWGS08	ARO:3004253	10	vanU_in_vanG_cl	ABA71726.1	DQ212986.1	glycopeptide resistance gene cluster;vanU	glycopeptide antibiotic	antibiotic target alteration	OD1	Mucosa	DescendingColon	"Also known as vanUG, is a vanG variant found in the vanG gene cluster."
ODIWGS08	ARO:3000191	45	tet(Q)	CAA79727.1	Z21523.1	tetracycline-resistant ribosomal protection protein	tetracycline antibiotic	antibiotic target protection	OD1	Mucosa	DescendingColon	"Tet(Q) is a ribosomal protection protein. Its gene is associated with a conjugative transposon and has been found in both Gram-positive and Gram-negative bacteria."
ODIWGS08	ARO:3005166	17	tet(X1)	CAC47933.1	AJ311171.1	tetracycline inactivation enzyme	tetracycline antibiotic	antibiotic inactivation	OD1	Mucosa	DescendingColon	"Tetracycline resistance gene tet(X) ortholog described by Fang et al. 2020."
ODIWGS09	ARO:3000186	1686	tet(M)	BAB82500.1	AB039845.1	tetracycline-resistant ribosomal protection protein	tetracycline antibiotic	antibiotic target protection	OD9	Lumen	AscendingColon	"Tet(M) is a ribosomal protection protein that confers tetracycline resistance. It is found on transposable DNA elements and its horizontal transfer between bacterial species has been documented."
ODIWGS09	ARO:3003549	103	mdtO	BAE78083.1	AP009048.1	major facilitator superfamily (MFS) antibiotic efflux pump	disinfecting agents and antiseptics;nucleoside antibiotic	antibiotic efflux	OD9	Lumen	AscendingColon	"Multidrug resistance efflux pump. Could be involved in resistance to puromycin, acriflavine and tetraphenylarsonium chloride."
ODIWGS09	ARO:3005009	32	qacE	AEH26330.1	HQ730118.1	major facilitator superfamily (MFS) antibiotic efflux pump	disinfecting agents and antiseptics	antibiotic efflux	OD9	Lumen	AscendingColon	"QacE is a resistance gene conferring resistance to antiseptics."
ODIWGS09	ARO:3004580	27	Kpne_KpnE	BAH63251.1	AP006725.1	small multidrug resistance (SMR) antibiotic efflux pump	aminoglycoside antibiotic;cephalosporin;disinfecting agents and antiseptics;macrolide antibiotic;peptide antibiotic;rifamycin antibiotic;tetracycline antibiotic	antibiotic efflux	OD9	Lumen	AscendingColon	"KpnE subunit of KpnEF resembles EbrAB from E. coli. Mutation in KpnEF resulted in increased susceptibility to cefepime, ceftriaxon, colistin, erythromycin, rifampin, tetracycline, and streptomycin as well as enhanced sensitivity toward sodium dodecyl sulfate, deoxycholate, dyes, benzalkonium chloride, chlorhexidine, and triclosan."
ODIWGS09	ARO:3004254	119	vanV_in_vanB_cl	AAO82019.1	AE016830.1	glycopeptide resistance gene cluster;vanV	glycopeptide antibiotic	antibiotic target alteration	OD9	Lumen	AscendingColon	"Also known as vanVB, is a vanV variant found in the vanB gene cluster. It is found in some but not all vanB operons in E. faecalis, suggesting the existence of varied gene compositions in vanB operons."
ODIWGS09	ARO:3000237	236	TolC	ACN32294.1	FJ768952.1	ATP-binding cassette (ABC) antibiotic efflux pump;major facilitator superfamily (MFS) antibiotic efflux pump;resistance-nodulation-cell division (RND) antibiotic efflux pump	aminocoumarin antibiotic;aminoglycoside antibiotic;carbapenem;cephalosporin;cephamycin;disinfecting agents and antiseptics;fluoroquinolone antibiotic;glycylcycline;macrolide antibiotic;penam;penem;peptide antibiotic;phenicol antibiotic;rifamycin antibiotic;tetracycline antibiotic	antibiotic efflux	OD9	Lumen	AscendingColon	"TolC is a protein subunit of many multidrug efflux complexes in Gram negative bacteria. It is an outer membrane efflux protein and is constitutively open. Regulation of efflux activity is often at its periplasmic entrance by other components of the efflux complex."
ODIWGS09	ARO:3000795	37	mdtE	BAE77781.1	AP009048.1	resistance-nodulation-cell division (RND) antibiotic efflux pump	fluoroquinolone antibiotic;macrolide antibiotic;penam	antibiotic efflux	OD9	Lumen	AscendingColon	"MdtE is the membrane fusion protein of the MdtEF multidrug efflux complex. It shares 70% sequence similarity with AcrA."
ODIWGS09	ARO:3004036	16235	tetB(60)	ANZ79241.1	KX000273.1	ATP-binding cassette (ABC) antibiotic efflux pump	tetracycline antibiotic	antibiotic efflux	OD9	Lumen	AscendingColon	"tetB(60) is a subunit of tetAB(60), an ABC transporter that confers resistance to tetracycline and tigercycline identified by screening a human saliva metagenomic library in Escherichia coli, which is required for resistance."
ODIWGS09	ARO:3005098	45	qacL	AAZ42322.1	DQ149925.1	small multidrug resistance (SMR) antibiotic efflux pump	disinfecting agents and antiseptics	antibiotic efflux	OD9	Lumen	AscendingColon	"A subunit of the qac multidrug efflux pump in Vibrio cholerae."
ODIWGS09	ARO:3000796	204	mdtF	AAC76539.1	U00096.1	resistance-nodulation-cell division (RND) antibiotic efflux pump	fluoroquinolone antibiotic;macrolide antibiotic;penam	antibiotic efflux	OD9	Lumen	AscendingColon	"MdtF is the multidrug inner membrane transporter for the MdtEF-TolC efflux complex."
ODIWGS09	ARO:3000830	611	cpxA	BAB38260.1	BA000007.3	resistance-nodulation-cell division (RND) antibiotic efflux pump	aminocoumarin antibiotic;aminoglycoside antibiotic	antibiotic efflux	OD9	Lumen	AscendingColon	"CpxA is a membrane-localized sensor kinase that is activated by envelope stress. It starts a kinase cascade that activates CpxR, which promotes efflux complex expression."
ODIWGS09	ARO:3007120	75	tet(O/M/O)	AAR29485.1	AY394560.1	tetracycline-resistant ribosomal protection protein	tetracycline antibiotic	antibiotic target protection	OD9	Lumen	AscendingColon	"Tet(O/M/O) is a mosaic tetracycline resistance gene and ribosomal protection protein."
ODIWGS09	ARO:3004442	147	tet(W/N/W)	AMP42147.1	KU736867.1	tetracycline-resistant ribosomal protection protein	tetracycline antibiotic	antibiotic target protection	OD9	Lumen	AscendingColon	"tet(W/N/W) is a mosaic tetracycline resistance gene and ribosomal protection protein."
ODIWGS09	ARO:3000194	1874	tet(W)	CAA10975.1	AJ222769.3	tetracycline-resistant ribosomal protection protein	tetracycline antibiotic	antibiotic target protection	OD9	Lumen	AscendingColon	"Tet(W) is a ribosomal protection protein. It is associated with both conjugative and non conjugative DNA and has been found strains of Clostridioides difficile."
ODIWGS09	ARO:3003950	13218	msbA	AAC74000.1	U00096.3	ATP-binding cassette (ABC) antibiotic efflux pump	nitroimidazole antibiotic	antibiotic efflux	OD9	Lumen	AscendingColon	"MsbA is a multidrug resistance transporter homolog from E. coli and belongs to a superfamily of transporters that contain an adenosine triphosphate (ATP) binding cassette (ABC) which is also called a nucleotide-binding domain (NBD). MsbA is a member of the MDR-ABC transporter group by sequence homology. MsbA transports lipid A, a major component of the bacterial outer cell membrane, and is the o…
ODIWGS09	ARO:3002871	402	tet(37)	AAN28721.1	AF540889.1	tetracycline inactivation enzyme	tetracycline antibiotic	antibiotic inactivation	OD9	Lumen	AscendingColon	"tet(37) is a chromosome-encoded oxidoreductase isolated from an uncultured bacterium that confers resistance to tetracycline."
ODIWGS09	ARO:3003018	423	dfrA22	AGY30828.1	KF525301.1	trimethoprim resistant dihydrofolate reductase dfr	diaminopyrimidine antibiotic	antibiotic target replacement	OD9	Lumen	AscendingColon	"dfrA22 is an integron-encoded dihydrofolate reductase found in Salmonella enterica."
ODIWGS09	ARO:3007047	58	mefH	QQM99829.1	MW269960.1	major facilitator superfamily (MFS) antibiotic efflux pump	macrolide antibiotic	antibiotic efflux	OD9	Lumen	AscendingColon	"mefH is an mef efflux pump protein."
ODIWGS09	ARO:3000491	83	acrD	BAA16344.1	AP009048.1	resistance-nodulation-cell division (RND) antibiotic efflux pump	aminoglycoside antibiotic	antibiotic efflux	OD9	Lumen	AscendingColon	"AcrD is an aminoglycoside efflux pump expressed in E. coli. Its expression can be induced by indole, and is regulated by baeRS and cpxAR."
ODIWGS09	ARO:3002837	19	lnuC	AAY32951.1	AY928180.1	lincosamide nucleotidyltransferase (LNU)	lincosamide antibiotic	antibiotic inactivation	OD9	Lumen	AscendingColon	"lnuC is a transposon-mediated nucleotidyltransferase found in Streptococcus agalactiae."
ODIWGS09	ARO:3003576	128	eptA	BAE78116.1	AP009048.1	pmr phosphoethanolamine transferase	peptide antibiotic	antibiotic target alteration	OD9	Lumen	AscendingColon	"PmrC mediates the modification of Lipid A by the addition of 4-amino-4-deoxy-L-arabinose (L-Ara4N) and phosphoethanolamine, resulting in a less negative cell membrane and decreased binding of polymyxin B."
ODIWGS09	ARO:3004038	59	Paer_emrE	AAG08375.1	AE004091.2	small multidrug resistance (SMR) antibiotic efflux pump	aminoglycoside antibiotic	antibiotic efflux	OD9	Lumen	AscendingColon	"EmrE is a small multidrug transporter that functions as a homodimer and that couples the efflux of small polyaromatic cations from the cell with the import of protons down an electrochemical gradient. Confers resistance to tetraphenylphosphonium, methyl viologen, gentamicin, kanamycin, and neomycin."
ODIWGS09	ARO:3000412	1559	sul2	AAL59753.1	AY055428.1	sulfonamide resistant sul	sulfonamide antibiotic;sulfone antibiotic	antibiotic target replacement	OD9	Lumen	AscendingColon	"Sul2 is a sulfonamide resistant dihydropteroate synthase of Gram-negative bacteria, usually found on small plasmids."
ODIWGS09	ARO:3002867	4673	dfrF	AAD01868.1	AF028812.1	trimethoprim resistant dihydrofolate reductase dfr	diaminopyrimidine antibiotic	antibiotic target replacement	OD9	Lumen	AscendingColon	"dfrF is a chromosome-encoded dihydrofolate reductase found in Streptococcus pyogenes."
ODIWGS09	ARO:3007121	160	tet(O/W)	AAR29969.1	AY485122.1	tetracycline-resistant ribosomal protection protein	tetracycline antibiotic	antibiotic target protection	OD9	Lumen	AscendingColon	"Tet(O/W) is a mosaic tetracycline resistance gene and ribosomal protection protein."
ODIWGS09	ARO:3000502	90	AcrF	AAC76298.1	U00096.1	resistance-nodulation-cell division (RND) antibiotic efflux pump	cephalosporin;cephamycin;fluoroquinolone antibiotic;penam	antibiotic efflux	OD9	Lumen	AscendingColon	"AcrF is a inner membrane transporter, similar to AcrB."
ODIWGS09	ARO:3000518	92	CRP	BAE77933.1	AP009048.1	resistance-nodulation-cell division (RND) antibiotic efflux pump	fluoroquinolone antibiotic;macrolide antibiotic;penam	antibiotic efflux	OD9	Lumen	AscendingColon	"CRP is a global regulator that represses MdtEF multidrug efflux pump expression."
ODIWGS09	ARO:3000195	5337	tetB(P)	AAA20117.1	L20800.1	tetracycline-resistant ribosomal protection protein	tetracycline antibiotic	antibiotic target protection	OD9	Lumen	AscendingColon	"TetB(P) is a tetracycline ribosomal protection protein found on the same operon as tetA(P), a tetracycline efflux protein."
ODIWGS09	ARO:3000254	120	emrY	BAA11237.1	D78168.1	major facilitator superfamily (MFS) antibiotic efflux pump	tetracycline antibiotic	antibiotic efflux	OD9	Lumen	AscendingColon	"emrY is a multidrug transport that moves substrates across the inner membrane of the Gram-negative E. coli. It is a homolog of emrB."
ODIWGS09	ARO:3000196	1992	tet(32)	ACH87088.1	EU722333.1	tetracycline-resistant ribosomal protection protein	tetracycline antibiotic	antibiotic target protection	OD9	Lumen	AscendingColon	"Tet(32) is a tetracycline resistance gene similar to Tet(O), and binds to the ribosome to confer tetracycline resistance as a ribosomal protection protein."
ODIWGS09	ARO:3002660	83	APH(6)-Id	AAC23556.1	AF024602.1	APH(6)	aminoglycoside antibiotic	antibiotic inactivation	OD9	Lumen	AscendingColon	"APH(6)-Id is an aminoglycoside phosphotransferase encoded by plasmids, integrative conjugative elements and chromosomal genomic islands in K. pneumoniae, Salmonella spp., E. coli, Shigella flexneri, Providencia alcalifaciens, Pseudomonas spp., V. cholerae, Edwardsiella tarda, Pasteurella multocida and Aeromonas bestiarum."
ODIWGS09	ARO:3001329	1436	mdtG	ABV18113.1	CP000800.1	major facilitator superfamily (MFS) antibiotic efflux pump	phosphonic acid antibiotic	antibiotic efflux	OD9	Lumen	AscendingColon	"The MdtG protein, also named YceE, appears to be a member of the major facilitator superfamily of transporters, and it has been reported, when overexpressed, to increase fosfomycin and deoxycholate resistances. mdtG is a member of the marA-soxS-rob regulon."
ODIWGS09	ARO:3004043	45	Ecol_acrA	AAC73565.1	U00096.3	resistance-nodulation-cell division (RND) antibiotic efflux pump	cephalosporin;disinfecting agents and antiseptics;fluoroquinolone antibiotic;glycylcycline;penam;phenicol antibiotic;rifamycin antibiotic;tetracycline antibiotic	antibiotic efflux	OD9	Lumen	AscendingColon	"AcrA is a subunit of the AcrAB-TolC multidrug efflux system that in E. coli."
ODIWGS09	ARO:3002857	96	dfrA26	CAL48457.1	AM403715.1	trimethoprim resistant dihydrofolate reductase dfr	diaminopyrimidine antibiotic	antibiotic target replacement	OD9	Lumen	AscendingColon	"dfrA26 is an integron-encoded dihydrofolate reductase found in Escherichia coli."
ODIWGS09	ARO:3003548	127	mdtN	BAE78084.1	AP009048.1	major facilitator superfamily (MFS) antibiotic efflux pump	disinfecting agents and antiseptics;nucleoside antibiotic	antibiotic efflux	OD9	Lumen	AscendingColon	"Multidrug resistance efflux pump. Could be involved in resistance to puromycin, acriflavine and tetraphenylarsonium chloride."
ODIWGS09	ARO:3003843	53	leuO	VWQ00850.1	LR730402.1	major facilitator superfamily (MFS) antibiotic efflux pump	disinfecting agents and antiseptics;nucleoside antibiotic	antibiotic efflux	OD9	Lumen	AscendingColon	"leuO, a LysR family transcription factor, exists in a wide variety of bacteria of the family Enterobacteriaceae and is involved in the regulation of as yet unidentified genes affecting the stress response and pathogenesis expression. LeuO is also an activator of the MdtNOP efflux pump."
ODIWGS09	ARO:3004253	583	vanU_in_vanG_cl	ABA71726.1	DQ212986.1	glycopeptide resistance gene cluster;vanU	glycopeptide antibiotic	antibiotic target alteration	OD9	Lumen	AscendingColon	"Also known as vanUG, is a vanG variant found in the vanG gene cluster."
ODIWGS09	ARO:3000833	7000	evgS	AAC75429.1	U00096.1	major facilitator superfamily (MFS) antibiotic efflux pump;resistance-nodulation-cell division (RND) antibiotic efflux pump	fluoroquinolone antibiotic;macrolide antibiotic;penam;tetracycline antibiotic	antibiotic efflux	OD9	Lumen	AscendingColon	"EvgS is a sensor protein that phosphorylates the regulatory protein EvgA. evgS corresponds to 1 locus in Pseudomonas aeruginosa PAO1 and 1 locus in Pseudomonas aeruginosa LESB58."
ODIWGS09	ARO:3002597	35	AAC6_Ie_APH2_Ia	AAA88548.1	GU565967.1	aminoglycoside bifunctional resistance protein	aminoglycoside antibiotic	antibiotic inactivation	OD9	Lumen	AscendingColon	"AAC(6')-Ie-APH(2'')-Ia is an aminoglycoside acetyltransferase encoded by plasmids and transposons in S. aureus, E. faecalis, E. faecium and Staphylococcus warneri."
ODIWGS09	ARO:3003578	1146	PmrF	AAC75314.1	U00096.1	pmr phosphoethanolamine transferase	peptide antibiotic	antibiotic target alteration	OD9	Lumen	AscendingColon	"PmrF is required for the synthesis and transfer of 4-amino-4-deoxy-L-arabinose (Ara4N) to Lipid A, which allows gram-negative bacteria to resist the antimicrobial activity of cationic antimicrobial peptides and antibiotics such as polymyxin. pmrF corresponds to 1 locus in Pseudomonas aeruginosa PAO1 and 1 locus in Pseudomonas aeruginosa LESB58."
ODIWGS09	ARO:3007122	182	tet(O/W/32/O)	ABF69686.1	DQ525023.1	tetracycline-resistant ribosomal protection protein	tetracycline antibiotic	antibiotic target protection	OD9	Lumen	AscendingColon	"Tet(O/W/32/O) is a mosaic tetracycline resistance gene and ribosomal protection protein."
ODIWGS09	ARO:3000206	56	emrK	BAA11236.1	D78168.1	major facilitator superfamily (MFS) antibiotic efflux pump	tetracycline antibiotic	antibiotic efflux	OD9	Lumen	AscendingColon	"emrK is a membrane fusion protein that is a homolog of EmrA. Together with the inner membrane transporter EmrY and the outer membrane channel TolC, it mediates multidrug efflux."
ODIWGS09	ARO:3002639	29	APH(3'')-Ib	ABK33456.1	AF313472.2	APH(3'')	aminoglycoside antibiotic	antibiotic inactivation	OD9	Lumen	AscendingColon	"APH(3'')-Ib is an aminoglycoside phosphotransferase encoded by plasmids, transposons, integrative conjugative elements and chromosomes in Enterobacteriaceae and Pseudomonas spp."
ODIWGS09	ARO:3003550	186	mdtP	BAE78082.1	AP009048.1	major facilitator superfamily (MFS) antibiotic efflux pump	disinfecting agents and antiseptics;nucleoside antibiotic	antibiotic efflux	OD9	Lumen	AscendingColon	"Multidrug resistance efflux pump. Could be involved in resistance to puromycin, acriflavine and tetraphenylarsonium chloride."
ODIWGS09	ARO:3003836	61	qacH	CAA76544.1	Y16945.1	small multidrug resistance (SMR) antibiotic efflux pump	disinfecting agents and antiseptics	antibiotic efflux	OD9	Lumen	AscendingColon	"qacH is a subunit of the qac multidrug efflux pump in Staphylococcus saprophyticus."
ODIWGS09	ARO:3004039	20	Ecol_emrE	CAA77936.1	Z11877.1	small multidrug resistance (SMR) antibiotic efflux pump	macrolide antibiotic	antibiotic efflux	OD9	Lumen	AscendingColon	"Member of the small MDR (multidrug resistance) family of transporters; in Escherichia coli this protein provides resistance against a number of positively charged compounds including ethidium bromide and erythromycin; proton-dependent secondary transporter which exchanges protons for compound translocation."
ODIWGS09	ARO:3003064	13	ykkD	CAB13167.1	AL009126.1	small multidrug resistance (SMR) antibiotic efflux pump	aminoglycoside antibiotic;phenicol antibiotic;tetracycline antibiotic	antibiotic efflux	OD9	Lumen	AscendingColon	"ykkD is an SMR-type protein that is a subunit of the ykkCD efflux pump."
ODIWGS09	ARO:3000216	105	acrB	AAC73564.1	U00096.3	resistance-nodulation-cell division (RND) antibiotic efflux pump	cephalosporin;disinfecting agents and antiseptics;fluoroquinolone antibiotic;glycylcycline;penam;phenicol antibiotic;rifamycin antibiotic;tetracycline antibiotic	antibiotic efflux	OD9	Lumen	AscendingColon	"Protein subunit of AcrA-AcrB-TolC multidrug efflux complex. AcrB functions as a herterotrimer which forms the inner membrane component and is primarily responsible for substrate recognition and energy transduction by acting as a drug/proton antiporter."
ODIWGS09	ARO:3000190	2061	tet(O)	AAA23033.2	M18896.2	tetracycline-resistant ribosomal protection protein	tetracycline antibiotic	antibiotic target protection	OD9	Lumen	AscendingColon	"Tet(O) is a ribosomal protection protein. It is associated with conjugative plasmids."
ODIWGS09	ARO:3003838	68	gadW	ANK04027.1	CP015085.1	resistance-nodulation-cell division (RND) antibiotic efflux pump	fluoroquinolone antibiotic;macrolide antibiotic;penam	antibiotic efflux	OD9	Lumen	AscendingColon	"GadW is an AraC-family regulator that promotes mdtEF expression to confer multidrug resistance. GadW inhibits GadX-dependent activation. GadW clearly represses gadX and, in situations where GadX is missing, activates gadA and gadBC."
ODIWGS09	ARO:3004583	20	Kpne_KpnF	BAH63252.1	AP006725.1	small multidrug resistance (SMR) antibiotic efflux pump	aminoglycoside antibiotic;cephalosporin;disinfecting agents and antiseptics;macrolide antibiotic;peptide antibiotic;rifamycin antibiotic;tetracycline antibiotic	antibiotic efflux	OD9	Lumen	AscendingColon	"KpnF subunit of KpnEF resembles EbrAB from E. coli. Mutation in KpnEF resulted in increased susceptibility to cefepime, ceftriaxon, colistin, erythromycin, rifampin, tetracycline, and streptomycin as well as enhanced sensitivity toward sodium dodecyl sulfate, deoxycholate, dyes, benzalkonium chloride, chlorhexidine, and triclosan."
ODIWGS09	ARO:3000245	135	RbpA	ADV91011.1	HQ203032.1	RbpA bacterial RNA polymerase-binding protein	rifamycin antibiotic	antibiotic target protection	OD9	Lumen	AscendingColon	"RNA-polymerase binding protein which confers resistance to rifampin."
ODIWGS09	ARO:3007119	1683	tet(O/32/O)	CAC41371.2	AJ295238.3	tetracycline-resistant ribosomal protection protein	tetracycline antibiotic	antibiotic target protection	OD9	Lumen	AscendingColon	"Tet(O/32/O) is a mosaic tetracycline resistance gene and ribosomal protection protein."
ODIWGS09	ARO:3000375	32	ErmB	AAF86219.1	AF242872.1	Erm 23S ribosomal RNA methyltransferase	lincosamide antibiotic;macrolide antibiotic;streptogramin A antibiotic;streptogramin B antibiotic;streptogramin antibiotic	antibiotic target alteration	OD9	Lumen	AscendingColon	"ErmB confers the MLSb phenotype. Similar to ErmC, expression of ErmB is inducible by erythromycin. The leader peptide causes attenuation of the mRNA and stabilizes the structure preventing further translation. When erythromycin is present, it binds the leader peptide causing a change in conformation allowing for the expression of ErmB."
ODIWGS09	ARO:3000676	11	H-NS	BAB35162.1	BA000007.3	major facilitator superfamily (MFS) antibiotic efflux pump;resistance-nodulation-cell division (RND) antibiotic efflux pump	cephalosporin;cephamycin;fluoroquinolone antibiotic;macrolide antibiotic;penam;tetracycline antibiotic	antibiotic efflux	OD9	Lumen	AscendingColon	"H-NS is a histone-like protein involved in global gene regulation in Gram-negative bacteria. It is a repressor of the membrane fusion protein genes acrE, mdtE, and emrK as well as nearby genes of many RND-type multidrug exporters."
ODIWGS09	ARO:3000596	88	ErmX	AAA98484.1	M36726.1	Erm 23S ribosomal RNA methyltransferase	lincosamide antibiotic;macrolide antibiotic;streptogramin A antibiotic;streptogramin B antibiotic;streptogramin antibiotic	antibiotic target alteration	OD9	Lumen	AscendingColon	"ErmX is a rRNA methyltransferase that protects the ribosome from inactivation due to antibiotic binding."
ODIWGS10	ARO:3000186	753	tet(M)	BAB82500.1	AB039845.1	tetracycline-resistant ribosomal protection protein	tetracycline antibiotic	antibiotic target protection	OD1	Lumen	Ileum	"Tet(M) is a ribosomal protection protein that confers tetracycline resistance. It is found on transposable DNA elements and its horizontal transfer between bacterial species has been documented."
ODIWGS10	ARO:3004254	95	vanV_in_vanB_cl	AAO82019.1	AE016830.1	glycopeptide resistance gene cluster;vanV	glycopeptide antibiotic	antibiotic target alteration	OD1	Lumen	Ileum	"Also known as vanVB, is a vanV variant found in the vanB gene cluster. It is found in some but not all vanB operons in E. faecalis, suggesting the existence of varied gene compositions in vanB operons."
ODIWGS10	ARO:3000237	19	TolC	ACN32294.1	FJ768952.1	ATP-binding cassette (ABC) antibiotic efflux pump;major facilitator superfamily (MFS) antibiotic efflux pump;resistance-nodulation-cell division (RND) antibiotic efflux pump	aminocoumarin antibiotic;aminoglycoside antibiotic;carbapenem;cephalosporin;cephamycin;disinfecting agents and antiseptics;fluoroquinolone antibiotic;glycylcycline;macrolide antibiotic;penam;penem;peptide antibiotic;phenicol antibiotic;rifamycin antibiotic;tetracycline antibiotic	antibiotic efflux	OD1	Lumen	Ileum	"TolC is a protein subunit of many multidrug efflux complexes in Gram negative bacteria. It is an outer membrane efflux protein and is constitutively open. Regulation of efflux activity is often at its periplasmic entrance by other components of the efflux complex."
ODIWGS10	ARO:3004036	5863	tetB(60)	ANZ79241.1	KX000273.1	ATP-binding cassette (ABC) antibiotic efflux pump	tetracycline antibiotic	antibiotic efflux	OD1	Lumen	Ileum	"tetB(60) is a subunit of tetAB(60), an ABC transporter that confers resistance to tetracycline and tigercycline identified by screening a human saliva metagenomic library in Escherichia coli, which is required for resistance."
ODIWGS10	ARO:3005098	40	qacL	AAZ42322.1	DQ149925.1	small multidrug resistance (SMR) antibiotic efflux pump	disinfecting agents and antiseptics	antibiotic efflux	OD1	Lumen	Ileum	"A subunit of the qac multidrug efflux pump in Vibrio cholerae."
ODIWGS10	ARO:3007120	72	tet(O/M/O)	AAR29485.1	AY394560.1	tetracycline-resistant ribosomal protection protein	tetracycline antibiotic	antibiotic target protection	OD1	Lumen	Ileum	"Tet(O/M/O) is a mosaic tetracycline resistance gene and ribosomal protection protein."
ODIWGS10	ARO:3004442	54	tet(W/N/W)	AMP42147.1	KU736867.1	tetracycline-resistant ribosomal protection protein	tetracycline antibiotic	antibiotic target protection	OD1	Lumen	Ileum	"tet(W/N/W) is a mosaic tetracycline resistance gene and ribosomal protection protein."
ODIWGS10	ARO:3000194	689	tet(W)	CAA10975.1	AJ222769.3	tetracycline-resistant ribosomal protection protein	tetracycline antibiotic	antibiotic target protection	OD1	Lumen	Ileum	"Tet(W) is a ribosomal protection protein. It is associated with both conjugative and non conjugative DNA and has been found strains of Clostridioides difficile."
ODIWGS10	ARO:3002871	159	tet(37)	AAN28721.1	AF540889.1	tetracycline inactivation enzyme	tetracycline antibiotic	antibiotic inactivation	OD1	Lumen	Ileum	"tet(37) is a chromosome-encoded oxidoreductase isolated from an uncultured bacterium that confers resistance to tetracycline."
ODIWGS10	ARO:3000491	19	acrD	BAA16344.1	AP009048.1	resistance-nodulation-cell division (RND) antibiotic efflux pump	aminoglycoside antibiotic	antibiotic efflux	OD1	Lumen	Ileum	"AcrD is an aminoglycoside efflux pump expressed in E. coli. Its expression can be induced by indole, and is regulated by baeRS and cpxAR."
ODIWGS10	ARO:3004038	49	Paer_emrE	AAG08375.1	AE004091.2	small multidrug resistance (SMR) antibiotic efflux pump	aminoglycoside antibiotic	antibiotic efflux	OD1	Lumen	Ileum	"EmrE is a small multidrug transporter that functions as a homodimer and that couples the efflux of small polyaromatic cations from the cell with the import of protons down an electrochemical gradient. Confers resistance to tetraphenylphosphonium, methyl viologen, gentamicin, kanamycin, and neomycin."
ODIWGS10	ARO:3000412	576	sul2	AAL59753.1	AY055428.1	sulfonamide resistant sul	sulfonamide antibiotic;sulfone antibiotic	antibiotic target replacement	OD1	Lumen	Ileum	"Sul2 is a sulfonamide resistant dihydropteroate synthase of Gram-negative bacteria, usually found on small plasmids."
ODIWGS10	ARO:3002867	2244	dfrF	AAD01868.1	AF028812.1	trimethoprim resistant dihydrofolate reductase dfr	diaminopyrimidine antibiotic	antibiotic target replacement	OD1	Lumen	Ileum	"dfrF is a chromosome-encoded dihydrofolate reductase found in Streptococcus pyogenes."
ODIWGS10	ARO:3000196	945	tet(32)	ACH87088.1	EU722333.1	tetracycline-resistant ribosomal protection protein	tetracycline antibiotic	antibiotic target protection	OD1	Lumen	Ileum	"Tet(32) is a tetracycline resistance gene similar to Tet(O), and binds to the ribosome to confer tetracycline resistance as a ribosomal protection protein."
ODIWGS10	ARO:3002660	33	APH(6)-Id	AAC23556.1	AF024602.1	APH(6)	aminoglycoside antibiotic	antibiotic inactivation	OD1	Lumen	Ileum	"APH(6)-Id is an aminoglycoside phosphotransferase encoded by plasmids, integrative conjugative elements and chromosomal genomic islands in K. pneumoniae, Salmonella spp., E. coli, Shigella flexneri, Providencia alcalifaciens, Pseudomonas spp., V. cholerae, Edwardsiella tarda, Pasteurella multocida and Aeromonas bestiarum."
ODIWGS10	ARO:3000567	14	tet(40)	CAM12479.1	AM419751.1	major facilitator superfamily (MFS) antibiotic efflux pump	tetracycline antibiotic	antibiotic efflux	OD1	Lumen	Ileum	"Tet40 is a tetracycline efflux pump found in the Gram-positive Clostridium. It is similar to tetA(P)."
ODIWGS10	ARO:3001329	734	mdtG	ABV18113.1	CP000800.1	major facilitator superfamily (MFS) antibiotic efflux pump	phosphonic acid antibiotic	antibiotic efflux	OD1	Lumen	Ileum	"The MdtG protein, also named YceE, appears to be a member of the major facilitator superfamily of transporters, and it has been reported, when overexpressed, to increase fosfomycin and deoxycholate resistances. mdtG is a member of the marA-soxS-rob regulon."
ODIWGS10	ARO:3004043	21	Ecol_acrA	AAC73565.1	U00096.3	resistance-nodulation-cell division (RND) antibiotic efflux pump	cephalosporin;disinfecting agents and antiseptics;fluoroquinolone antibiotic;glycylcycline;penam;phenicol antibiotic;rifamycin antibiotic;tetracycline antibiotic	antibiotic efflux	OD1	Lumen	Ileum	"AcrA is a subunit of the AcrAB-TolC multidrug efflux system that in E. coli."
ODIWGS10	ARO:3002857	112	dfrA26	CAL48457.1	AM403715.1	trimethoprim resistant dihydrofolate reductase dfr	diaminopyrimidine antibiotic	antibiotic target replacement	OD1	Lumen	Ileum	"dfrA26 is an integron-encoded dihydrofolate reductase found in Escherichia coli."
ODIWGS10	ARO:3000192	2762	tet(S)	AAA25293.1	L09756.1	tetracycline-resistant ribosomal protection protein	tetracycline antibiotic	antibiotic target protection	OD1	Lumen	Ileum	"Tet(S) is a ribosomal protection protein found in Gram-positive and Gram-negative strains. It is similar to tet(M) and tet(O)."
ODIWGS10	ARO:3004253	226	vanU_in_vanG_cl	ABA71726.1	DQ212986.1	glycopeptide resistance gene cluster;vanU	glycopeptide antibiotic	antibiotic target alteration	OD1	Lumen	Ileum	"Also known as vanUG, is a vanG variant found in the vanG gene cluster."
ODIWGS10	ARO:3002597	34	AAC6_Ie_APH2_Ia	AAA88548.1	GU565967.1	aminoglycoside bifunctional resistance protein	aminoglycoside antibiotic	antibiotic inactivation	OD1	Lumen	Ileum	"AAC(6')-Ie-APH(2'')-Ia is an aminoglycoside acetyltransferase encoded by plasmids and transposons in S. aureus, E. faecalis, E. faecium and Staphylococcus warneri."
ODIWGS10	ARO:3007122	157	tet(O/W/32/O)	ABF69686.1	DQ525023.1	tetracycline-resistant ribosomal protection protein	tetracycline antibiotic	antibiotic target protection	OD1	Lumen	Ileum	"Tet(O/W/32/O) is a mosaic tetracycline resistance gene and ribosomal protection protein."
ODIWGS10	ARO:3003550	43	mdtP	BAE78082.1	AP009048.1	major facilitator superfamily (MFS) antibiotic efflux pump	disinfecting agents and antiseptics;nucleoside antibiotic	antibiotic efflux	OD1	Lumen	Ileum	"Multidrug resistance efflux pump. Could be involved in resistance to puromycin, acriflavine and tetraphenylarsonium chloride."
ODIWGS10	ARO:3003836	31	qacH	CAA76544.1	Y16945.1	small multidrug resistance (SMR) antibiotic efflux pump	disinfecting agents and antiseptics	antibiotic efflux	OD1	Lumen	Ileum	"qacH is a subunit of the qac multidrug efflux pump in Staphylococcus saprophyticus."
ODIWGS10	ARO:3000216	11	acrB	AAC73564.1	U00096.3	resistance-nodulation-cell division (RND) antibiotic efflux pump	cephalosporin;disinfecting agents and antiseptics;fluoroquinolone antibiotic;glycylcycline;penam;phenicol antibiotic;rifamycin antibiotic;tetracycline antibiotic	antibiotic efflux	OD1	Lumen	Ileum	"Protein subunit of AcrA-AcrB-TolC multidrug efflux complex. AcrB functions as a herterotrimer which forms the inner membrane component and is primarily responsible for substrate recognition and energy transduction by acting as a drug/proton antiporter."
ODIWGS10	ARO:3005069	12	rsmA	AAC16242.1	AF061757.1	resistance-nodulation-cell division (RND) antibiotic efflux pump	diaminopyrimidine antibiotic;fluoroquinolone antibiotic;phenicol antibiotic	antibiotic efflux	OD1	Lumen	Ileum	"rsmA is a gene that regulates virulence of Pseudomonas aeruginosa. However, its negative effect on MexEF-OprN overexpression has been noted to confer resistance to various antibiotics. It's Escherichia coli homolog is csrA."
ODIWGS10	ARO:3000190	946	tet(O)	AAA23033.2	M18896.2	tetracycline-resistant ribosomal protection protein	tetracycline antibiotic	antibiotic target protection	OD1	Lumen	Ileum	"Tet(O) is a ribosomal protection protein. It is associated with conjugative plasmids."
ODIWGS10	ARO:3004583	13	Kpne_KpnF	BAH63252.1	AP006725.1	small multidrug resistance (SMR) antibiotic efflux pump	aminoglycoside antibiotic;cephalosporin;disinfecting agents and antiseptics;macrolide antibiotic;peptide antibiotic;rifamycin antibiotic;tetracycline antibiotic	antibiotic efflux	OD1	Lumen	Ileum	"KpnF subunit of KpnEF resembles EbrAB from E. coli. Mutation in KpnEF resulted in increased susceptibility to cefepime, ceftriaxon, colistin, erythromycin, rifampin, tetracycline, and streptomycin as well as enhanced sensitivity toward sodium dodecyl sulfate, deoxycholate, dyes, benzalkonium chloride, chlorhexidine, and triclosan."
ODIWGS10	ARO:3000245	81	RbpA	ADV91011.1	HQ203032.1	RbpA bacterial RNA polymerase-binding protein	rifamycin antibiotic	antibiotic target protection	OD1	Lumen	Ileum	"RNA-polymerase binding protein which confers resistance to rifampin."
ODIWGS10	ARO:3003105	875	dfrA3	AAA25550.1	J03306.1	trimethoprim resistant dihydrofolate reductase dfr	diaminopyrimidine antibiotic	antibiotic target replacement	OD1	Lumen	Ileum	"dfrA3 is an integron-encoded dihydrofolate reductase found in Escherichia coli."
ODIWGS10	ARO:3007119	542	tet(O/32/O)	CAC41371.2	AJ295238.3	tetracycline-resistant ribosomal protection protein	tetracycline antibiotic	antibiotic target protection	OD1	Lumen	Ileum	"Tet(O/32/O) is a mosaic tetracycline resistance gene and ribosomal protection protein."
ODIWGS10	ARO:3000375	79	ErmB	AAF86219.1	AF242872.1	Erm 23S ribosomal RNA methyltransferase	lincosamide antibiotic;macrolide antibiotic;streptogramin A antibiotic;streptogramin B antibiotic;streptogramin antibiotic	antibiotic target alteration	OD1	Lumen	Ileum	"ErmB confers the MLSb phenotype. Similar to ErmC, expression of ErmB is inducible by erythromycin. The leader peptide causes attenuation of the mRNA and stabilizes the structure preventing further translation. When erythromycin is present, it binds the leader peptide causing a change in conformation allowing for the expression of ErmB."
ODIWGS10	ARO:3000596	99	ErmX	AAA98484.1	M36726.1	Erm 23S ribosomal RNA methyltransferase	lincosamide antibiotic;macrolide antibiotic;streptogramin A antibiotic;streptogramin B antibiotic;streptogramin antibiotic	antibiotic target alteration	OD1	Lumen	Ileum	"ErmX is a rRNA methyltransferase that protects the ribosome from inactivation due to antibiotic binding."
ODIWGS11	ARO:3001413	14	OXA-18	AAB58555.1	U85514.1	OXA beta-lactamase	carbapenem;cephalosporin;penam	antibiotic inactivation	OD5	Mucosa	AscendingColon	"OXA-18 is a beta-lactamase found in P. aeruginosa and Rickettsia."
ODIWGS12	ARO:3000808	34	MexI	AAG07594.1	AE004091.2	resistance-nodulation-cell division (RND) antibiotic efflux pump	disinfecting agents and antiseptics;fluoroquinolone antibiotic;tetracycline antibiotic	antibiotic efflux	OD2	Lumen	Ileum	"MexI is the inner membrane transporter of the efflux complex MexGHI-OpmD."
ODIWGS12	ARO:3003549	11	mdtO	BAE78083.1	AP009048.1	major facilitator superfamily (MFS) antibiotic efflux pump	disinfecting agents and antiseptics;nucleoside antibiotic	antibiotic efflux	OD2	Lumen	Ileum	"Multidrug resistance efflux pump. Could be involved in resistance to puromycin, acriflavine and tetraphenylarsonium chloride."
ODIWGS12	ARO:3004074	37	MuxB	AAG05915.1	AE004091.2	resistance-nodulation-cell division (RND) antibiotic efflux pump	aminocoumarin antibiotic;macrolide antibiotic;monobactam;tetracycline antibiotic	antibiotic efflux	OD2	Lumen	Ileum	"MuxB is one of the two necessary RND components in the Pseudomonas aeruginosa efflux pump system MuxABC-OpmB."
ODIWGS12	ARO:3000194	45	tet(W)	CAA10975.1	AJ222769.3	tetracycline-resistant ribosomal protection protein	tetracycline antibiotic	antibiotic target protection	OD2	Lumen	Ileum	"Tet(W) is a ribosomal protection protein. It is associated with both conjugative and non conjugative DNA and has been found strains of Clostridioides difficile."
ODIWGS12	ARO:3003950	373	msbA	AAC74000.1	U00096.3	ATP-binding cassette (ABC) antibiotic efflux pump	nitroimidazole antibiotic	antibiotic efflux	OD2	Lumen	Ileum	"MsbA is a multidrug resistance transporter homolog from E. coli and belongs to a superfamily of transporters that contain an adenosine triphosphate (ATP) binding cassette (ABC) which is also called a nucleotide-binding domain (NBD). MsbA is a member of the MDR-ABC transporter group by sequence homology. MsbA transports lipid A, a major component of the bacterial outer cell membrane, and is the o…
ODIWGS12	ARO:3003982	173	LlmA_23S_CLI	APB03216.1	KX531046.1	Llm 23S ribosomal RNA methyltransferase	lincosamide antibiotic	antibiotic target alteration	OD2	Lumen	Ileum	"Lincosamide (Clindamycin) resistant (putative) ribosomal methyltransferase related to the RlmK 23S rRNA methyltransferase COG family. Detected in Paenibacillus sp. LC231, an isolated strain of Paenibacillus found in Lechuguilla Cave, NM, USA. Described by Pawlowski et al. 2016."
ODIWGS12	ARO:3002650	14	APH(3')-Vb	AAC32025.1	M22126.1	APH(3')	aminoglycoside antibiotic	antibiotic inactivation	OD2	Lumen	Ileum	"APH(3')-Vb is a chromosomal-encoded aminoglycoside phosphotransferase in Streptomyces ribosidificus."
ODIWGS12	ARO:3007047	16	mefH	QQM99829.1	MW269960.1	major facilitator superfamily (MFS) antibiotic efflux pump	macrolide antibiotic	antibiotic efflux	OD2	Lumen	Ileum	"mefH is an mef efflux pump protein."
ODIWGS12	ARO:3002867	21	dfrF	AAD01868.1	AF028812.1	trimethoprim resistant dihydrofolate reductase dfr	diaminopyrimidine antibiotic	antibiotic target replacement	OD2	Lumen	Ileum	"dfrF is a chromosome-encoded dihydrofolate reductase found in Streptococcus pyogenes."
ODIWGS12	ARO:3007121	14	tet(O/W)	AAR29969.1	AY485122.1	tetracycline-resistant ribosomal protection protein	tetracycline antibiotic	antibiotic target protection	OD2	Lumen	Ileum	"Tet(O/W) is a mosaic tetracycline resistance gene and ribosomal protection protein."
ODIWGS12	ARO:3000518	15	CRP	BAE77933.1	AP009048.1	resistance-nodulation-cell division (RND) antibiotic efflux pump	fluoroquinolone antibiotic;macrolide antibiotic;penam	antibiotic efflux	OD2	Lumen	Ileum	"CRP is a global regulator that represses MdtEF multidrug efflux pump expression."
ODIWGS12	ARO:3002660	17	APH(6)-Id	AAC23556.1	AF024602.1	APH(6)	aminoglycoside antibiotic	antibiotic inactivation	OD2	Lumen	Ileum	"APH(6)-Id is an aminoglycoside phosphotransferase encoded by plasmids, integrative conjugative elements and chromosomal genomic islands in K. pneumoniae, Salmonella spp., E. coli, Shigella flexneri, Providencia alcalifaciens, Pseudomonas spp., V. cholerae, Edwardsiella tarda, Pasteurella multocida and Aeromonas bestiarum."
ODIWGS12	ARO:3000832	132	evgA	BAB36671.1	BA000007.3	major facilitator superfamily (MFS) antibiotic efflux pump;resistance-nodulation-cell division (RND) antibiotic efflux pump	fluoroquinolone antibiotic;macrolide antibiotic;penam;tetracycline antibiotic	antibiotic efflux	OD2	Lumen	Ileum	"EvgA, when phosphorylated, is a positive regulator for efflux protein complexes emrKY and mdtEF. While usually phosphorylated in a EvgS dependent manner, it can be phosphorylated in the absence of EvgS when overexpressed."
ODIWGS12	ARO:3007122	14	tet(O/W/32/O)	ABF69686.1	DQ525023.1	tetracycline-resistant ribosomal protection protein	tetracycline antibiotic	antibiotic target protection	OD2	Lumen	Ileum	"Tet(O/W/32/O) is a mosaic tetracycline resistance gene and ribosomal protection protein."
ODIWGS12	ARO:3002639	28	APH(3'')-Ib	ABK33456.1	AF313472.2	APH(3'')	aminoglycoside antibiotic	antibiotic inactivation	OD2	Lumen	Ileum	"APH(3'')-Ib is an aminoglycoside phosphotransferase encoded by plasmids, transposons, integrative conjugative elements and chromosomes in Enterobacteriaceae and Pseudomonas spp."
ODIWGS12	ARO:3005069	26	rsmA	AAC16242.1	AF061757.1	resistance-nodulation-cell division (RND) antibiotic efflux pump	diaminopyrimidine antibiotic;fluoroquinolone antibiotic;phenicol antibiotic	antibiotic efflux	OD2	Lumen	Ileum	"rsmA is a gene that regulates virulence of Pseudomonas aeruginosa. However, its negative effect on MexEF-OprN overexpression has been noted to confer resistance to various antibiotics. It's Escherichia coli homolog is csrA."
ODIWGS12	ARO:3000190	56	tet(O)	AAA23033.2	M18896.2	tetracycline-resistant ribosomal protection protein	tetracycline antibiotic	antibiotic target protection	OD2	Lumen	Ileum	"Tet(O) is a ribosomal protection protein. It is associated with conjugative plasmids."
ODIWGS12	ARO:3003839	67	Mrx	AAS13767.1	AY522923.1	macrolide phosphotransferase (MPH)	macrolide antibiotic	antibiotic inactivation	OD2	Lumen	Ileum	"Mrx is part of the macrolide inactivation gene cluster in Aeromonas hydrophila."
ODIWGS13	ARO:3003549	358	mdtO	BAE78083.1	AP009048.1	major facilitator superfamily (MFS) antibiotic efflux pump	disinfecting agents and antiseptics;nucleoside antibiotic	antibiotic efflux	OD2	Mucosa	Ileum	"Multidrug resistance efflux pump. Could be involved in resistance to puromycin, acriflavine and tetraphenylarsonium chloride."
ODIWGS13	ARO:3000793	394	mdtB	AAC75136.1	U00096.1	resistance-nodulation-cell division (RND) antibiotic efflux pump	aminocoumarin antibiotic	antibiotic efflux	OD2	Mucosa	Ileum	"MdtB is a transporter that forms a heteromultimer complex with MdtC to form a multidrug transporter. MdtBC is part of the MdtABC-TolC efflux complex."
ODIWGS13	ARO:3000074	30	emrB	AAC75733.1	U00096.1	major facilitator superfamily (MFS) antibiotic efflux pump	fluoroquinolone antibiotic	antibiotic efflux	OD2	Mucosa	Ileum	"emrB is a translocase in the emrB -TolC efflux protein in E. coli. It recognizes substrates including carbonyl cyanide m-chlorophenylhydrazone (CCCP), nalidixic acid, and thioloactomycin."
ODIWGS13	ARO:3000237	135	TolC	ACN32294.1	FJ768952.1	ATP-binding cassette (ABC) antibiotic efflux pump;major facilitator superfamily (MFS) antibiotic efflux pump;resistance-nodulation-cell division (RND) antibiotic efflux pump	aminocoumarin antibiotic;aminoglycoside antibiotic;carbapenem;cephalosporin;cephamycin;disinfecting agents and antiseptics;fluoroquinolone antibiotic;glycylcycline;macrolide antibiotic;penam;penem;peptide antibiotic;phenicol antibiotic;rifamycin antibiotic;tetracycline antibiotic	antibiotic efflux	OD2	Mucosa	Ileum	"TolC is a protein subunit of many multidrug efflux complexes in Gram negative bacteria. It is an outer membrane efflux protein and is constitutively open. Regulation of efflux activity is often at its periplasmic entrance by other components of the efflux complex."
ODIWGS13	ARO:3000796	436	mdtF	AAC76539.1	U00096.1	resistance-nodulation-cell division (RND) antibiotic efflux pump	fluoroquinolone antibiotic;macrolide antibiotic;penam	antibiotic efflux	OD2	Mucosa	Ileum	"MdtF is the multidrug inner membrane transporter for the MdtEF-TolC efflux complex."
ODIWGS13	ARO:3000830	102	cpxA	BAB38260.1	BA000007.3	resistance-nodulation-cell division (RND) antibiotic efflux pump	aminocoumarin antibiotic;aminoglycoside antibiotic	antibiotic efflux	OD2	Mucosa	Ileum	"CpxA is a membrane-localized sensor kinase that is activated by envelope stress. It starts a kinase cascade that activates CpxR, which promotes efflux complex expression."
ODIWGS13	ARO:3000194	59	tet(W)	CAA10975.1	AJ222769.3	tetracycline-resistant ribosomal protection protein	tetracycline antibiotic	antibiotic target protection	OD2	Mucosa	Ileum	"Tet(W) is a ribosomal protection protein. It is associated with both conjugative and non conjugative DNA and has been found strains of Clostridioides difficile."
ODIWGS13	ARO:3003950	1143	msbA	AAC74000.1	U00096.3	ATP-binding cassette (ABC) antibiotic efflux pump	nitroimidazole antibiotic	antibiotic efflux	OD2	Mucosa	Ileum	"MsbA is a multidrug resistance transporter homolog from E. coli and belongs to a superfamily of transporters that contain an adenosine triphosphate (ATP) binding cassette (ABC) which is also called a nucleotide-binding domain (NBD). MsbA is a member of the MDR-ABC transporter group by sequence homology. MsbA transports lipid A, a major component of the bacterial outer cell membrane, and is the o…
ODIWGS13	ARO:3004659	24	Mef(En2)	AAF74725.1	AF251288.1	major facilitator superfamily (MFS) antibiotic efflux pump	macrolide antibiotic	antibiotic efflux	OD2	Mucosa	Ileum	"NBU2-encoded resistance gene. An MefE homolog in Bacteroides species. Macrolide efflux MFS transporter."
ODIWGS13	ARO:3002871	64	tet(37)	AAN28721.1	AF540889.1	tetracycline inactivation enzyme	tetracycline antibiotic	antibiotic inactivation	OD2	Mucosa	Ileum	"tet(37) is a chromosome-encoded oxidoreductase isolated from an uncultured bacterium that confers resistance to tetracycline."
ODIWGS13	ARO:3007047	31	mefH	QQM99829.1	MW269960.1	major facilitator superfamily (MFS) antibiotic efflux pump	macrolide antibiotic	antibiotic efflux	OD2	Mucosa	Ileum	"mefH is an mef efflux pump protein."
ODIWGS13	ARO:3000491	297	acrD	BAA16344.1	AP009048.1	resistance-nodulation-cell division (RND) antibiotic efflux pump	aminoglycoside antibiotic	antibiotic efflux	OD2	Mucosa	Ileum	"AcrD is an aminoglycoside efflux pump expressed in E. coli. Its expression can be induced by indole, and is regulated by baeRS and cpxAR."
ODIWGS13	ARO:3000191	603	tet(Q)	CAA79727.1	Z21523.1	tetracycline-resistant ribosomal protection protein	tetracycline antibiotic	antibiotic target protection	OD2	Mucosa	Ileum	"Tet(Q) is a ribosomal protection protein. Its gene is associated with a conjugative transposon and has been found in both Gram-positive and Gram-negative bacteria."
ODIWGS13	ARO:3003841	929	kdpE	AAC73788.1	U00096.3	kdpDE	aminoglycoside antibiotic	antibiotic efflux	OD2	Mucosa	Ileum	"kdpE is a transcriptional activator that is part of the two-component system KdpD/KdpE that is studied for its regulatory role in potassium transport and has been identified as an adaptive regulator involved in the virulence and intracellular survival of pathogenic bacteria. kdpE regulates a range of virulence loci through direct promoter binding."
ODIWGS13	ARO:3003730	4407	Bbif_ileS_MUP	ADP36409.1	CP001840.1	antibiotic-resistant isoleucyl-tRNA synthetase (ileS)	mupirocin-like antibiotic	antibiotic target alteration	OD2	Mucosa	Ileum	"Bifidobacteria have an intrinsically resistant form of ileS (isoleucyl-tRNA synthetase) that confers resistance to mupirocin."
ODIWGS13	ARO:3000412	65	sul2	AAL59753.1	AY055428.1	sulfonamide resistant sul	sulfonamide antibiotic;sulfone antibiotic	antibiotic target replacement	OD2	Mucosa	Ileum	"Sul2 is a sulfonamide resistant dihydropteroate synthase of Gram-negative bacteria, usually found on small plasmids."
ODIWGS13	ARO:3000768	20	abeS	ACJ59254.1	CP001172.1	small multidrug resistance (SMR) antibiotic efflux pump	aminocoumarin antibiotic;macrolide antibiotic	antibiotic efflux	OD2	Mucosa	Ileum	"AbeS in an efflux pump of the SMR family of transporters found in Acinetobacter baumannii."
ODIWGS13	ARO:3004480	9019	Bado_rpoB_RIF	WP_041777404.1	NC_008618.1	rifamycin-resistant beta-subunit of RNA polymerase (rpoB)	peptide antibiotic;rifamycin antibiotic	antibiotic target alteration;antibiotic target replacement	OD2	Mucosa	Ileum	"Bifidobacterium are antibiotic resistant probiotics are prescribed to upkeep the population beneficial bacteria in the gut microbiome. However, horizontal gene transfer among gut microbes could create harmful antibiotic-resistant pathogenic bacteria, such as Mycobacterium tuberculosis. Lokesh et al. analyzed Bifidobacterium antitubercular drug resistance and mutations in rpoB. They found that B.…
ODIWGS13	ARO:3000828	637	baeR	BAA15935.1	AP009048.1	resistance-nodulation-cell division (RND) antibiotic efflux pump	aminocoumarin antibiotic;aminoglycoside antibiotic	antibiotic efflux	OD2	Mucosa	Ileum	"BaeR is a response regulator that promotes the expression of MdtABC and AcrD efflux complexes."
ODIWGS13	ARO:3000502	355	AcrF	AAC76298.1	U00096.1	resistance-nodulation-cell division (RND) antibiotic efflux pump	cephalosporin;cephamycin;fluoroquinolone antibiotic;penam	antibiotic efflux	OD2	Mucosa	Ileum	"AcrF is a inner membrane transporter, similar to AcrB."
ODIWGS13	ARO:3000518	41	CRP	BAE77933.1	AP009048.1	resistance-nodulation-cell division (RND) antibiotic efflux pump	fluoroquinolone antibiotic;macrolide antibiotic;penam	antibiotic efflux	OD2	Mucosa	Ileum	"CRP is a global regulator that represses MdtEF multidrug efflux pump expression."
ODIWGS13	ARO:3000567	118	tet(40)	CAM12479.1	AM419751.1	major facilitator superfamily (MFS) antibiotic efflux pump	tetracycline antibiotic	antibiotic efflux	OD2	Mucosa	Ileum	"Tet40 is a tetracycline efflux pump found in the Gram-positive Clostridium. It is similar to tetA(P)."
ODIWGS13	ARO:3003548	100	mdtN	BAE78084.1	AP009048.1	major facilitator superfamily (MFS) antibiotic efflux pump	disinfecting agents and antiseptics;nucleoside antibiotic	antibiotic efflux	OD2	Mucosa	Ileum	"Multidrug resistance efflux pump. Could be involved in resistance to puromycin, acriflavine and tetraphenylarsonium chloride."
ODIWGS13	ARO:3003843	62	leuO	VWQ00850.1	LR730402.1	major facilitator superfamily (MFS) antibiotic efflux pump	disinfecting agents and antiseptics;nucleoside antibiotic	antibiotic efflux	OD2	Mucosa	Ileum	"leuO, a LysR family transcription factor, exists in a wide variety of bacteria of the family Enterobacteriaceae and is involved in the regulation of as yet unidentified genes affecting the stress response and pathogenesis expression. LeuO is also an activator of the MdtNOP efflux pump."
ODIWGS13	ARO:3007122	23	tet(O/W/32/O)	ABF69686.1	DQ525023.1	tetracycline-resistant ribosomal protection protein	tetracycline antibiotic	antibiotic target protection	OD2	Mucosa	Ileum	"Tet(O/W/32/O) is a mosaic tetracycline resistance gene and ribosomal protection protein."
ODIWGS13	ARO:3003952	264	YojI	AAC75271.1	U00096.3	ATP-binding cassette (ABC) antibiotic efflux pump	peptide antibiotic	antibiotic efflux	OD2	Mucosa	Ileum	"YojI mediates resistance to the peptide antibiotic microcin J25 when it is expressed from a multicopy vector. YojI is capable of pumping out microcin molecules. The outer membrane protein TolC in addition to YojI is required for export of microcin J25 out of the cell. Microcin J25 is thus the first known substrate for YojI."
ODIWGS13	ARO:3000216	199	acrB	AAC73564.1	U00096.3	resistance-nodulation-cell division (RND) antibiotic efflux pump	cephalosporin;disinfecting agents and antiseptics;fluoroquinolone antibiotic;glycylcycline;penam;phenicol antibiotic;rifamycin antibiotic;tetracycline antibiotic	antibiotic efflux	OD2	Mucosa	Ileum	"Protein subunit of AcrA-AcrB-TolC multidrug efflux complex. AcrB functions as a herterotrimer which forms the inner membrane component and is primarily responsible for substrate recognition and energy transduction by acting as a drug/proton antiporter."
ODIWGS13	ARO:3000190	157	tet(O)	AAA23033.2	M18896.2	tetracycline-resistant ribosomal protection protein	tetracycline antibiotic	antibiotic target protection	OD2	Mucosa	Ileum	"Tet(O) is a ribosomal protection protein. It is associated with conjugative plasmids."
ODIWGS13	ARO:3000792	57	mdtA	AAC75135.2	U00096.1	resistance-nodulation-cell division (RND) antibiotic efflux pump	aminocoumarin antibiotic	antibiotic efflux	OD2	Mucosa	Ileum	"MdtA is the membrane fusion protein of the multidrug efflux complex mdtABC."
ODIWGS13	ARO:3000829	137	baeS	BAA15934.1	AP009048.1	resistance-nodulation-cell division (RND) antibiotic efflux pump	aminocoumarin antibiotic;aminoglycoside antibiotic	antibiotic efflux	OD2	Mucosa	Ileum	"BaeS is a sensor kinase in the BaeSR regulatory system. While it phosphorylates BaeR to increase its activity, BaeS is not necessary for overexpressed BaeR to confer resistance."
ODIWGS13	ARO:3000676	10	H-NS	BAB35162.1	BA000007.3	major facilitator superfamily (MFS) antibiotic efflux pump;resistance-nodulation-cell division (RND) antibiotic efflux pump	cephalosporin;cephamycin;fluoroquinolone antibiotic;macrolide antibiotic;penam;tetracycline antibiotic	antibiotic efflux	OD2	Mucosa	Ileum	"H-NS is a histone-like protein involved in global gene regulation in Gram-negative bacteria. It is a repressor of the membrane fusion protein genes acrE, mdtE, and emrK as well as nearby genes of many RND-type multidrug exporters."
ODIWGS14	ARO:3000186	192	tet(M)	BAB82500.1	AB039845.1	tetracycline-resistant ribosomal protection protein	tetracycline antibiotic	antibiotic target protection	OD8	Lumen	DescendingColon	"Tet(M) is a ribosomal protection protein that confers tetracycline resistance. It is found on transposable DNA elements and its horizontal transfer between bacterial species has been documented."
ODIWGS14	ARO:3003549	86	mdtO	BAE78083.1	AP009048.1	major facilitator superfamily (MFS) antibiotic efflux pump	disinfecting agents and antiseptics;nucleoside antibiotic	antibiotic efflux	OD8	Lumen	DescendingColon	"Multidrug resistance efflux pump. Could be involved in resistance to puromycin, acriflavine and tetraphenylarsonium chloride."
ODIWGS14	ARO:3000793	198	mdtB	AAC75136.1	U00096.1	resistance-nodulation-cell division (RND) antibiotic efflux pump	aminocoumarin antibiotic	antibiotic efflux	OD8	Lumen	DescendingColon	"MdtB is a transporter that forms a heteromultimer complex with MdtC to form a multidrug transporter. MdtBC is part of the MdtABC-TolC efflux complex."
ODIWGS14	ARO:3002999	65	CblA-1	ACT97415.1	GQ343019.1	CblA beta-lactamase	cephalosporin	antibiotic inactivation	OD8	Lumen	DescendingColon	"CblA-1 beta-lactamase is a class A beta-lactamase found in Bacteroides uniformis that is species-specific."
ODIWGS14	ARO:3000616	188	mel	AAL73129.1	AF227521.1	msr-type ABC-F protein	macrolide antibiotic;streptogramin antibiotic	antibiotic target protection	OD8	Lumen	DescendingColon	"Mel, a homolog of MsrA, is an ABC-F subfamily protein associated with macrolide resistance. It is expressed on the same operon as mefA and mefE, both MFS-type efflux proteins that confer macrolide resistance."
ODIWGS14	ARO:3002931	327	vanS_in_vanA_cl	AAA65954.1	M97297.1	glycopeptide resistance gene cluster;vanS	glycopeptide antibiotic	antibiotic target alteration	OD8	Lumen	DescendingColon	"Also known as vanSA, is a vanS variant found in the vanA gene cluster."
ODIWGS14	ARO:3004254	20	vanV_in_vanB_cl	AAO82019.1	AE016830.1	glycopeptide resistance gene cluster;vanV	glycopeptide antibiotic	antibiotic target alteration	OD8	Lumen	DescendingColon	"Also known as vanVB, is a vanV variant found in the vanB gene cluster. It is found in some but not all vanB operons in E. faecalis, suggesting the existence of varied gene compositions in vanB operons."
ODIWGS14	ARO:3000182	28	tet(Y)	AAC72341.1	AF070999.1	major facilitator superfamily (MFS) antibiotic efflux pump	tetracycline antibiotic	antibiotic efflux	OD8	Lumen	DescendingColon	"TetY is a tetracycline efflux pump found in Gram-negative bacteria (Aeromonas and Escherichia). It is associated with plasmid DNA."
ODIWGS14	ARO:3000795	29	mdtE	BAE77781.1	AP009048.1	resistance-nodulation-cell division (RND) antibiotic efflux pump	fluoroquinolone antibiotic;macrolide antibiotic;penam	antibiotic efflux	OD8	Lumen	DescendingColon	"MdtE is the membrane fusion protein of the MdtEF multidrug efflux complex. It shares 70% sequence similarity with AcrA."
ODIWGS14	ARO:3004683	48	aadS	AAA27459.1	M72415.1	ANT(6)	aminoglycoside antibiotic	antibiotic inactivation	OD8	Lumen	DescendingColon	"A novel Tn4551 streptomycin-resistance gene that was phenotypically silent in wild-type Bacteroides; expression could be activated by a trans-acting chromosomal mutation."
ODIWGS14	ARO:3007113	27	nimK	AXA20009.1	MG827401.1	nitroimidazole reductase	nitroimidazole antibiotic	antibiotic inactivation	OD8	Lumen	DescendingColon	"nimK is a nitroimidazole reductase mainly found in Bacteroides fragilis that is associated with the deactivation of nitroimidazole antibiotics such as metronidazole. Minimum inhibitory concentrations observed in isolates vary greatly depending on species, strain, and nitroimidazole treatment."
ODIWGS14	ARO:3007011	255	mdeA	WP_002289367.1	NZ_CP044221.1	major facilitator superfamily (MFS) antibiotic efflux pump	aminoglycoside antibiotic;disinfecting agents and antiseptics;fluoroquinolone antibiotic;penam;tetracycline antibiotic	antibiotic efflux	OD8	Lumen	DescendingColon	"mdeA is a multidrug efflux pump that confers resistance in varying degrees to several unrelated antibiotics, including kanamycin, tetracycline, ampicillin, oxacillin, ciprofloxacin, nalidixic acid, acriflavine, and ethidium bromide."
ODIWGS14	ARO:3005098	17	qacL	AAZ42322.1	DQ149925.1	small multidrug resistance (SMR) antibiotic efflux pump	disinfecting agents and antiseptics	antibiotic efflux	OD8	Lumen	DescendingColon	"A subunit of the qac multidrug efflux pump in Vibrio cholerae."
ODIWGS14	ARO:3000796	210	mdtF	AAC76539.1	U00096.1	resistance-nodulation-cell division (RND) antibiotic efflux pump	fluoroquinolone antibiotic;macrolide antibiotic;penam	antibiotic efflux	OD8	Lumen	DescendingColon	"MdtF is the multidrug inner membrane transporter for the MdtEF-TolC efflux complex."
ODIWGS14	ARO:3000830	82	cpxA	BAB38260.1	BA000007.3	resistance-nodulation-cell division (RND) antibiotic efflux pump	aminocoumarin antibiotic;aminoglycoside antibiotic	antibiotic efflux	OD8	Lumen	DescendingColon	"CpxA is a membrane-localized sensor kinase that is activated by envelope stress. It starts a kinase cascade that activates CpxR, which promotes efflux complex expression."
ODIWGS14	ARO:3003577	1025	ugd	AAC75089.1	U00096.1	pmr phosphoethanolamine transferase	peptide antibiotic	antibiotic target alteration	OD8	Lumen	DescendingColon	"PmrE is required for the synthesis and transfer of 4-amino-4-deoxy-L-arabinose (Ara4N) to Lipid A, which allows gram-negative bacteria to resist the antimicrobial activity of cationic antimicrobial peptides and antibiotics such as polymyxin."
ODIWGS14	ARO:3000815	79	mgrA	BAB41874.1	BA000018.3	ATP-binding cassette (ABC) antibiotic efflux pump;major facilitator superfamily (MFS) antibiotic efflux pump	cephalosporin;disinfecting agents and antiseptics;fluoroquinolone antibiotic;penam;peptide antibiotic;tetracycline antibiotic	antibiotic efflux	OD8	Lumen	DescendingColon	"MgrA, also known as NorR, is a regulator for norA, norB, and tet38. It is a positive regulator for norA expression, but is a direct repressor for norB and an indirect repressor of tet38."
ODIWGS14	ARO:3004442	32	tet(W/N/W)	AMP42147.1	KU736867.1	tetracycline-resistant ribosomal protection protein	tetracycline antibiotic	antibiotic target protection	OD8	Lumen	DescendingColon	"tet(W/N/W) is a mosaic tetracycline resistance gene and ribosomal protection protein."
ODIWGS14	ARO:3003954	124	efmA	BAG75524.1	AB467372.1	major facilitator superfamily (MFS) antibiotic efflux pump	fluoroquinolone antibiotic;macrolide antibiotic	antibiotic efflux	OD8	Lumen	DescendingColon	"efmA is an MFS transporter permease in E. faecium."
ODIWGS14	ARO:3000194	225	tet(W)	CAA10975.1	AJ222769.3	tetracycline-resistant ribosomal protection protein	tetracycline antibiotic	antibiotic target protection	OD8	Lumen	DescendingColon	"Tet(W) is a ribosomal protection protein. It is associated with both conjugative and non conjugative DNA and has been found strains of Clostridioides difficile."
ODIWGS14	ARO:3001328	28	Ecol_mdfA	AFH35853.1	JQ394987.1	major facilitator superfamily (MFS) antibiotic efflux pump	disinfecting agents and antiseptics;tetracycline antibiotic	antibiotic efflux	OD8	Lumen	DescendingColon	"Multidrug efflux pump in E. coli. This multidrug efflux system was originally identified as the Cmr/CmlA chloramphenicol exporter."
ODIWGS14	ARO:3004659	75	Mef(En2)	AAF74725.1	AF251288.1	major facilitator superfamily (MFS) antibiotic efflux pump	macrolide antibiotic	antibiotic efflux	OD8	Lumen	DescendingColon	"NBU2-encoded resistance gene. An MefE homolog in Bacteroides species. Macrolide efflux MFS transporter."
ODIWGS14	ARO:3004033	1527	tetB(46)	AET10445.1	HQ652506.1	ATP-binding cassette (ABC) antibiotic efflux pump	tetracycline antibiotic	antibiotic efflux	OD8	Lumen	DescendingColon	"tetB(46) is a subunit of tetAB(46), a heterodimeric ABC transporter, that is required for conferring tetracycline resistance in Streptococcus australis isolated from the oral cavity."
ODIWGS14	ARO:3002871	34	tet(37)	AAN28721.1	AF540889.1	tetracycline inactivation enzyme	tetracycline antibiotic	antibiotic inactivation	OD8	Lumen	DescendingColon	"tet(37) is a chromosome-encoded oxidoreductase isolated from an uncultured bacterium that confers resistance to tetracycline."
ODIWGS14	ARO:3007047	25	mefH	QQM99829.1	MW269960.1	major facilitator superfamily (MFS) antibiotic efflux pump	macrolide antibiotic	antibiotic efflux	OD8	Lumen	DescendingColon	"mefH is an mef efflux pump protein."
ODIWGS14	ARO:3000491	159	acrD	BAA16344.1	AP009048.1	resistance-nodulation-cell division (RND) antibiotic efflux pump	aminoglycoside antibiotic	antibiotic efflux	OD8	Lumen	DescendingColon	"AcrD is an aminoglycoside efflux pump expressed in E. coli. Its expression can be induced by indole, and is regulated by baeRS and cpxAR."
ODIWGS14	ARO:3000191	647	tet(Q)	CAA79727.1	Z21523.1	tetracycline-resistant ribosomal protection protein	tetracycline antibiotic	antibiotic target protection	OD8	Lumen	DescendingColon	"Tet(Q) is a ribosomal protection protein. Its gene is associated with a conjugative transposon and has been found in both Gram-positive and Gram-negative bacteria."
ODIWGS14	ARO:3003841	1142	kdpE	AAC73788.1	U00096.3	kdpDE	aminoglycoside antibiotic	antibiotic efflux	OD8	Lumen	DescendingColon	"kdpE is a transcriptional activator that is part of the two-component system KdpD/KdpE that is studied for its regulatory role in potassium transport and has been identified as an adaptive regulator involved in the virulence and intracellular survival of pathogenic bacteria. kdpE regulates a range of virulence loci through direct promoter binding."
ODIWGS14	ARO:3003730	3940	Bbif_ileS_MUP	ADP36409.1	CP001840.1	antibiotic-resistant isoleucyl-tRNA synthetase (ileS)	mupirocin-like antibiotic	antibiotic target alteration	OD8	Lumen	DescendingColon	"Bifidobacteria have an intrinsically resistant form of ileS (isoleucyl-tRNA synthetase) that confers resistance to mupirocin."
ODIWGS14	ARO:3003576	33	eptA	BAE78116.1	AP009048.1	pmr phosphoethanolamine transferase	peptide antibiotic	antibiotic target alteration	OD8	Lumen	DescendingColon	"PmrC mediates the modification of Lipid A by the addition of 4-amino-4-deoxy-L-arabinose (L-Ara4N) and phosphoethanolamine, resulting in a less negative cell membrane and decreased binding of polymyxin B."
ODIWGS14	ARO:3000412	123	sul2	AAL59753.1	AY055428.1	sulfonamide resistant sul	sulfonamide antibiotic;sulfone antibiotic	antibiotic target replacement	OD8	Lumen	DescendingColon	"Sul2 is a sulfonamide resistant dihydropteroate synthase of Gram-negative bacteria, usually found on small plasmids."
ODIWGS14	ARO:3000768	18	abeS	ACJ59254.1	CP001172.1	small multidrug resistance (SMR) antibiotic efflux pump	aminocoumarin antibiotic;macrolide antibiotic	antibiotic efflux	OD8	Lumen	DescendingColon	"AbeS in an efflux pump of the SMR family of transporters found in Acinetobacter baumannii."
ODIWGS14	ARO:3002867	11	dfrF	AAD01868.1	AF028812.1	trimethoprim resistant dihydrofolate reductase dfr	diaminopyrimidine antibiotic	antibiotic target replacement	OD8	Lumen	DescendingColon	"dfrF is a chromosome-encoded dihydrofolate reductase found in Streptococcus pyogenes."
ODIWGS14	ARO:3007121	53	tet(O/W)	AAR29969.1	AY485122.1	tetracycline-resistant ribosomal protection protein	tetracycline antibiotic	antibiotic target protection	OD8	Lumen	DescendingColon	"Tet(O/W) is a mosaic tetracycline resistance gene and ribosomal protection protein."
ODIWGS14	ARO:3004480	8515	Bado_rpoB_RIF	WP_041777404.1	NC_008618.1	rifamycin-resistant beta-subunit of RNA polymerase (rpoB)	peptide antibiotic;rifamycin antibiotic	antibiotic target alteration;antibiotic target replacement	OD8	Lumen	DescendingColon	"Bifidobacterium are antibiotic resistant probiotics are prescribed to upkeep the population beneficial bacteria in the gut microbiome. However, horizontal gene transfer among gut microbes could create harmful antibiotic-resistant pathogenic bacteria, such as Mycobacterium tuberculosis. Lokesh et al. analyzed Bifidobacterium antitubercular drug resistance and mutations in rpoB. They found that B.…
ODIWGS14	ARO:3000502	256	AcrF	AAC76298.1	U00096.1	resistance-nodulation-cell division (RND) antibiotic efflux pump	cephalosporin;cephamycin;fluoroquinolone antibiotic;penam	antibiotic efflux	OD8	Lumen	DescendingColon	"AcrF is a inner membrane transporter, similar to AcrB."
ODIWGS14	ARO:3000518	94	CRP	BAE77933.1	AP009048.1	resistance-nodulation-cell division (RND) antibiotic efflux pump	fluoroquinolone antibiotic;macrolide antibiotic;penam	antibiotic efflux	OD8	Lumen	DescendingColon	"CRP is a global regulator that represses MdtEF multidrug efflux pump expression."
ODIWGS14	ARO:3000195	648	tetB(P)	AAA20117.1	L20800.1	tetracycline-resistant ribosomal protection protein	tetracycline antibiotic	antibiotic target protection	OD8	Lumen	DescendingColon	"TetB(P) is a tetracycline ribosomal protection protein found on the same operon as tetA(P), a tetracycline efflux protein."
ODIWGS14	ARO:3000254	50	emrY	BAA11237.1	D78168.1	major facilitator superfamily (MFS) antibiotic efflux pump	tetracycline antibiotic	antibiotic efflux	OD8	Lumen	DescendingColon	"emrY is a multidrug transport that moves substrates across the inner membrane of the Gram-negative E. coli. It is a homolog of emrB."
ODIWGS14	ARO:3000196	359	tet(32)	ACH87088.1	EU722333.1	tetracycline-resistant ribosomal protection protein	tetracycline antibiotic	antibiotic target protection	OD8	Lumen	DescendingColon	"Tet(32) is a tetracycline resistance gene similar to Tet(O), and binds to the ribosome to confer tetracycline resistance as a ribosomal protection protein."
ODIWGS14	ARO:3002660	31	APH(6)-Id	AAC23556.1	AF024602.1	APH(6)	aminoglycoside antibiotic	antibiotic inactivation	OD8	Lumen	DescendingColon	"APH(6)-Id is an aminoglycoside phosphotransferase encoded by plasmids, integrative conjugative elements and chromosomal genomic islands in K. pneumoniae, Salmonella spp., E. coli, Shigella flexneri, Providencia alcalifaciens, Pseudomonas spp., V. cholerae, Edwardsiella tarda, Pasteurella multocida and Aeromonas bestiarum."
ODIWGS14	ARO:3000567	101	tet(40)	CAM12479.1	AM419751.1	major facilitator superfamily (MFS) antibiotic efflux pump	tetracycline antibiotic	antibiotic efflux	OD8	Lumen	DescendingColon	"Tet40 is a tetracycline efflux pump found in the Gram-positive Clostridium. It is similar to tetA(P)."
ODIWGS14	ARO:3001329	423	mdtG	ABV18113.1	CP000800.1	major facilitator superfamily (MFS) antibiotic efflux pump	phosphonic acid antibiotic	antibiotic efflux	OD8	Lumen	DescendingColon	"The MdtG protein, also named YceE, appears to be a member of the major facilitator superfamily of transporters, and it has been reported, when overexpressed, to increase fosfomycin and deoxycholate resistances. mdtG is a member of the marA-soxS-rob regulon."
ODIWGS14	ARO:3004043	29	Ecol_acrA	AAC73565.1	U00096.3	resistance-nodulation-cell division (RND) antibiotic efflux pump	cephalosporin;disinfecting agents and antiseptics;fluoroquinolone antibiotic;glycylcycline;penam;phenicol antibiotic;rifamycin antibiotic;tetracycline antibiotic	antibiotic efflux	OD8	Lumen	DescendingColon	"AcrA is a subunit of the AcrAB-TolC multidrug efflux system that in E. coli."
ODIWGS14	ARO:3003551	85	emeA	BAC11911.1	AB091338.1	multidrug and toxic compound extrusion (MATE) transporter	disinfecting agents and antiseptics	antibiotic efflux	OD8	Lumen	DescendingColon	"A multidrug efflux pump from Enterococcus faecalis. There exist efflux activity of several antimicrobial agents such as DAPI, Hoechst 33342 and acriflavine. Efflux of DAPI via EmeA was strongly inhibited by reserpine."
ODIWGS14	ARO:3003112	111	lsaC	AEA37904.1	HM990671.1	lsa-type ABC-F protein	lincosamide antibiotic;pleuromutilin antibiotic;streptogramin antibiotic	antibiotic target protection	OD8	Lumen	DescendingColon	"LsaC is an ABC-F subfamily protein expressed in Streptococcus agalactiae. It confers resistance to lincomycin, clindamycin, dalfopristin, and tiamulin."
ODIWGS14	ARO:3003548	210	mdtN	BAE78084.1	AP009048.1	major facilitator superfamily (MFS) antibiotic efflux pump	disinfecting agents and antiseptics;nucleoside antibiotic	antibiotic efflux	OD8	Lumen	DescendingColon	"Multidrug resistance efflux pump. Could be involved in resistance to puromycin, acriflavine and tetraphenylarsonium chloride."
ODIWGS14	ARO:3003843	24	leuO	VWQ00850.1	LR730402.1	major facilitator superfamily (MFS) antibiotic efflux pump	disinfecting agents and antiseptics;nucleoside antibiotic	antibiotic efflux	OD8	Lumen	DescendingColon	"leuO, a LysR family transcription factor, exists in a wide variety of bacteria of the family Enterobacteriaceae and is involved in the regulation of as yet unidentified genes affecting the stress response and pathogenesis expression. LeuO is also an activator of the MdtNOP efflux pump."
ODIWGS14	ARO:3004253	53	vanU_in_vanG_cl	ABA71726.1	DQ212986.1	glycopeptide resistance gene cluster;vanU	glycopeptide antibiotic	antibiotic target alteration	OD8	Lumen	DescendingColon	"Also known as vanUG, is a vanG variant found in the vanG gene cluster."
ODIWGS14	ARO:3000833	777	evgS	AAC75429.1	U00096.1	major facilitator superfamily (MFS) antibiotic efflux pump;resistance-nodulation-cell division (RND) antibiotic efflux pump	fluoroquinolone antibiotic;macrolide antibiotic;penam;tetracycline antibiotic	antibiotic efflux	OD8	Lumen	DescendingColon	"EvgS is a sensor protein that phosphorylates the regulatory protein EvgA. evgS corresponds to 1 locus in Pseudomonas aeruginosa PAO1 and 1 locus in Pseudomonas aeruginosa LESB58."
ODIWGS14	ARO:3002955	28	vanY_in_vanA_cl	AAA65958.1	M97297.1	glycopeptide resistance gene cluster;vanY	glycopeptide antibiotic	antibiotic target alteration	OD8	Lumen	DescendingColon	"Also known as vanYA, is a vanY variant found in the vanA gene cluster."
ODIWGS14	ARO:3002897	28	SAT-4	AAB53445.1	U01945.1	streptothricin acetyltransferase (SAT)	nucleoside antibiotic	antibiotic inactivation	OD8	Lumen	DescendingColon	"SAT-4 is a plasmid-mediated streptothricin acetyltransferase and streptothricin (a nucleoside antibiotic) resistant determinant. Originally described from a Campylobacter coli BE/G4 plasmid gene sequence by Jacob et al, 1994."
ODIWGS14	ARO:3007122	45	tet(O/W/32/O)	ABF69686.1	DQ525023.1	tetracycline-resistant ribosomal protection protein	tetracycline antibiotic	antibiotic target protection	OD8	Lumen	DescendingColon	"Tet(O/W/32/O) is a mosaic tetracycline resistance gene and ribosomal protection protein."
ODIWGS14	ARO:3000205	30	tet(X)	AAA27471.1	M37699.1	tetracycline inactivation enzyme	glycylcycline;tetracycline antibiotic	antibiotic inactivation	OD8	Lumen	DescendingColon	"Tet(X) is a flavin-dependent monooxygenase conferring resistance to tetracycline antibiotics. Tet(X) hydroxylates position 11a of the tetraketide group thus inactivating the antibiotic."
ODIWGS14	ARO:3000516	36	emrR	AAC75731.1	U00096.3	major facilitator superfamily (MFS) antibiotic efflux pump	fluoroquinolone antibiotic	antibiotic efflux	OD8	Lumen	DescendingColon	"EmrR is a negative regulator for the EmrAB-TolC multidrug efflux pump in E. coli. Mutations lead to EmrAB-TolC overexpression."
ODIWGS14	ARO:3002962	81	vanZ_in_vanA_cl	AAA65959.1	M97297.1	glycopeptide resistance gene cluster;vanZ	glycopeptide antibiotic	antibiotic target alteration	OD8	Lumen	DescendingColon	"Also known as vanZA, is a vanZ variant found in the vanA gene cluster."
ODIWGS14	ARO:3000010	17	vanA	AAA65956.1	M97297.1	Van ligase;glycopeptide resistance gene cluster	glycopeptide antibiotic	antibiotic target alteration	OD8	Lumen	DescendingColon	"VanA is a D-Ala-D-Ala ligase homolog that synthesizes D-Ala-D-Lac, an alternative substrate for peptidoglycan synthesis that reduces vancomycin binding affinity. It has been isolated from VREs. It is associated with both vancomycin and teicoplanin resistance."
ODIWGS14	ARO:3005166	28	tet(X1)	CAC47933.1	AJ311171.1	tetracycline inactivation enzyme	tetracycline antibiotic	antibiotic inactivation	OD8	Lumen	DescendingColon	"Tetracycline resistance gene tet(X) ortholog described by Fang et al. 2020."
ODIWGS14	ARO:3000617	29	mecA	AGC51118.1	KC243783.1	methicillin resistant PBP2	carbapenem;cephalosporin;cephamycin;monobactam;penam	antibiotic target replacement	OD8	Lumen	DescendingColon	"A foreign PBP2a acquired by lateral gene transfer that able to perform peptidoglycan synthesis in the presence of beta-lactams."
ODIWGS14	ARO:3004032	1757	tetA(46)	AET10444.1	HQ652506.1	ATP-binding cassette (ABC) antibiotic efflux pump	tetracycline antibiotic	antibiotic efflux	OD8	Lumen	DescendingColon	"tetA(46) is a subunit of tetAB(46), a heterodimeric ABC transporter, that is required for conferring tetracycline resistance in Streptococcus australis isolated from the oral cavity."
ODIWGS14	ARO:3003952	257	YojI	AAC75271.1	U00096.3	ATP-binding cassette (ABC) antibiotic efflux pump	peptide antibiotic	antibiotic efflux	OD8	Lumen	DescendingColon	"YojI mediates resistance to the peptide antibiotic microcin J25 when it is expressed from a multicopy vector. YojI is capable of pumping out microcin molecules. The outer membrane protein TolC in addition to YojI is required for export of microcin J25 out of the cell. Microcin J25 is thus the first known substrate for YojI."
ODIWGS14	ARO:3000251	203	msrA	CAA36304.1	X52085.1	msr-type ABC-F protein	macrolide antibiotic;streptogramin B antibiotic;streptogramin antibiotic	antibiotic target protection	OD8	Lumen	DescendingColon	"MsrA is an ABC-F subfamily ribosomal protection protein expressed in Staphylococcus species which confers resistance to erythromycin and streptogramin B antibiotics through antibiotic target protection mechanisms. It is associated with plasmid DNA."
ODIWGS14	ARO:3000215	48	mecR1	ABQ47844.1	CP000703.1	methicillin resistant PBP2	carbapenem;cephalosporin;cephamycin;monobactam;penam	antibiotic target replacement	OD8	Lumen	DescendingColon	"mecR1 is a transmembrane spanning and signal transducing protein which in response to interaction with beta-lactam antibiotics results in upregulation of the mecA/mecR1/mecI operon."
ODIWGS14	ARO:3002986	500	bacA	AAC76093.1	U00096.3	undecaprenyl pyrophosphate related proteins	peptide antibiotic	antibiotic target alteration	OD8	Lumen	DescendingColon	"The bacA gene product (BacA) recycles undecaprenyl pyrophosphate during cell wall biosynthesis which confers resistance to bacitracin."
ODIWGS14	ARO:3000216	109	acrB	AAC73564.1	U00096.3	resistance-nodulation-cell division (RND) antibiotic efflux pump	cephalosporin;disinfecting agents and antiseptics;fluoroquinolone antibiotic;glycylcycline;penam;phenicol antibiotic;rifamycin antibiotic;tetracycline antibiotic	antibiotic efflux	OD8	Lumen	DescendingColon	"Protein subunit of AcrA-AcrB-TolC multidrug efflux complex. AcrB functions as a herterotrimer which forms the inner membrane component and is primarily responsible for substrate recognition and energy transduction by acting as a drug/proton antiporter."
ODIWGS14	ARO:3002556	13	AAC(6')-Ii	AAB63533.1	L12710.1	AAC(6')	aminoglycoside antibiotic	antibiotic inactivation	OD8	Lumen	DescendingColon	"AAC(6')-Ii is a chromosomal-encoded aminoglycoside acetyltransferase in Enterococcus spp."
ODIWGS14	ARO:3005069	21	rsmA	AAC16242.1	AF061757.1	resistance-nodulation-cell division (RND) antibiotic efflux pump	diaminopyrimidine antibiotic;fluoroquinolone antibiotic;phenicol antibiotic	antibiotic efflux	OD8	Lumen	DescendingColon	"rsmA is a gene that regulates virulence of Pseudomonas aeruginosa. However, its negative effect on MexEF-OprN overexpression has been noted to confer resistance to various antibiotics. It's Escherichia coli homolog is csrA."
ODIWGS14	ARO:3000190	180	tet(O)	AAA23033.2	M18896.2	tetracycline-resistant ribosomal protection protein	tetracycline antibiotic	antibiotic target protection	OD8	Lumen	DescendingColon	"Tet(O) is a ribosomal protection protein. It is associated with conjugative plasmids."
ODIWGS14	ARO:3000499	20	AcrE	AAC76297.1	U00096.1	resistance-nodulation-cell division (RND) antibiotic efflux pump	cephalosporin;cephamycin;fluoroquinolone antibiotic;penam	antibiotic efflux	OD8	Lumen	DescendingColon	"AcrE is a membrane fusion protein, similar to AcrA."
ODIWGS14	ARO:3002647	56	APH(3')-IIIa	AGV10830.1	CP004067.1	APH(3')	aminoglycoside antibiotic	antibiotic inactivation	OD8	Lumen	DescendingColon	"APH(3')-IIIa is a plasmid-encoded aminoglycoside phosphotransferase in S. aureus and Enterococcus spp."
ODIWGS14	ARO:3000245	73	RbpA	ADV91011.1	HQ203032.1	RbpA bacterial RNA polymerase-binding protein	rifamycin antibiotic	antibiotic target protection	OD8	Lumen	DescendingColon	"RNA-polymerase binding protein which confers resistance to rifampin."
ODIWGS14	ARO:3002919	756	vanR_in_vanA_cl	AAA65953.1	M97297.1	glycopeptide resistance gene cluster;vanR	glycopeptide antibiotic	antibiotic target alteration	OD8	Lumen	DescendingColon	"Also known as vanRA, is a vanR variant found in the vanA gene cluster."
ODIWGS14	ARO:3000026	237	mepA	AAU95768.1	AY661734.1	multidrug and toxic compound extrusion (MATE) transporter	glycylcycline;tetracycline antibiotic	antibiotic efflux	OD8	Lumen	DescendingColon	"MepA is an efflux protein regulated by MepR and part of the MepRAB cluster. Its presence in Staphylococcus aureus led to multidrug resistance, while it has also been shown to decrease tigecycline susceptibility."
ODIWGS14	ARO:3007119	192	tet(O/32/O)	CAC41371.2	AJ295238.3	tetracycline-resistant ribosomal protection protein	tetracycline antibiotic	antibiotic target protection	OD8	Lumen	DescendingColon	"Tet(O/32/O) is a mosaic tetracycline resistance gene and ribosomal protection protein."
ODIWGS14	ARO:3000316	54	mphA	BAA03776.1	D16251.1	macrolide phosphotransferase (MPH)	macrolide antibiotic	antibiotic inactivation	OD8	Lumen	DescendingColon	"The mphA gene encodes for resistance enzyme MPH(2')-I which preferentially inactivate 14-membered macrolides (e.g.erythromycin, telithromycin, roxithromycin) over 16-membered macrolides (e.g.tylosin, spiramycin). It phosphorylates macrolides at 2'-OH hydroxyl of desosamine sugar of macrolides in a GTP-dependent manner."
ODIWGS14	ARO:3005040	54	YajC	TKW44661.1	VAOQ01003483.1	resistance-nodulation-cell division (RND) antibiotic efflux pump	cephalosporin;disinfecting agents and antiseptics;fluoroquinolone antibiotic;glycopeptide antibiotic;glycylcycline;oxazolidinone antibiotic;penam;phenicol antibiotic;rifamycin antibiotic;tetracycline antibiotic	antibiotic efflux	OD8	Lumen	DescendingColon	"YajC interacts with the AcrAB-TolC efflux pump in a way that in uncharacterized but is shown to grant increased fitness in the presence of linezolid, rifampicin, and vancomycin."
ODIWGS14	ARO:3007013	89	sdrM	BAB43261.1	BA000018.3	major facilitator superfamily (MFS) antibiotic efflux pump	disinfecting agents and antiseptics;fluoroquinolone antibiotic	antibiotic efflux	OD8	Lumen	DescendingColon	"sdrM encodes an efflux pump that confers resistance to norfloxacin and ethidium bromide, making this a multidrug resistance gene."
ODIWGS14	ARO:3002942	153	vanH_in_vanA_cl	AAA65955.1	M97297.1	glycopeptide resistance gene cluster;vanH	glycopeptide antibiotic	antibiotic target alteration	OD8	Lumen	DescendingColon	"Also known as vanHA, is a vanH variant in the vanA gene cluster."
ODIWGS14	ARO:3000676	18	H-NS	BAB35162.1	BA000007.3	major facilitator superfamily (MFS) antibiotic efflux pump;resistance-nodulation-cell division (RND) antibiotic efflux pump	cephalosporin;cephamycin;fluoroquinolone antibiotic;macrolide antibiotic;penam;tetracycline antibiotic	antibiotic efflux	OD8	Lumen	DescendingColon	"H-NS is a histone-like protein involved in global gene regulation in Gram-negative bacteria. It is a repressor of the membrane fusion protein genes acrE, mdtE, and emrK as well as nearby genes of many RND-type multidrug exporters."
ODIWGS14	ARO:3000596	74	ErmX	AAA98484.1	M36726.1	Erm 23S ribosomal RNA methyltransferase	lincosamide antibiotic;macrolide antibiotic;streptogramin A antibiotic;streptogramin B antibiotic;streptogramin antibiotic	antibiotic target alteration	OD8	Lumen	DescendingColon	"ErmX is a rRNA methyltransferase that protects the ribosome from inactivation due to antibiotic binding."
ODIWGS15	ARO:3000616	92	mel	AAL73129.1	AF227521.1	msr-type ABC-F protein	macrolide antibiotic;streptogramin antibiotic	antibiotic target protection	OD1	Mucosa	Ileum	"Mel, a homolog of MsrA, is an ABC-F subfamily protein associated with macrolide resistance. It is expressed on the same operon as mefA and mefE, both MFS-type efflux proteins that confer macrolide resistance."
ODIWGS15	ARO:3003905	35	ANT(4')-Ib	ADA62098.1	GQ900432.1	ANT(4')	aminoglycoside antibiotic	antibiotic inactivation	OD1	Mucosa	Ileum	"Aminoglycoside nucleotidyltransferase sequence from Staphylococcus aureus plasmid."
ODIWGS16	ARO:3005047	85	eptB	CCI79240.1	FO203501.1	pmr phosphoethanolamine transferase	peptide antibiotic	antibiotic target alteration	OD2	Mucosa	AscendingColon	"eptB is a phosphoethanolamine transferase. It confers resistance to peptide antibiotics."
ODIWGS16	ARO:3004683	63	aadS	AAA27459.1	M72415.1	ANT(6)	aminoglycoside antibiotic	antibiotic inactivation	OD2	Mucosa	AscendingColon	"A novel Tn4551 streptomycin-resistance gene that was phenotypically silent in wild-type Bacteroides; expression could be activated by a trans-acting chromosomal mutation."
ODIWGS16	ARO:3005057	36	tet(X5)	WP_150378267.1	NZ_CP040912.1	tetracycline inactivation enzyme	tetracycline antibiotic	antibiotic inactivation	OD2	Mucosa	AscendingColon	"Tet(X5) is a tetracycline inactivating enzyme. It is a variant of tet(X)."
ODIWGS16	ARO:3005059	143	LptD	AIA35096.1	CP007727.1	ATP-binding cassette (ABC) antibiotic efflux pump	aminocoumarin antibiotic;peptide antibiotic;rifamycin antibiotic	antibiotic efflux	OD2	Mucosa	AscendingColon	"LptD is involved in LPS transport in a ABC Transporter efflux system. It confers resistance to rifamycin, aminocoumarin, and peptide antibiotics."
ODIWGS16	ARO:3004122	198	Kpne_OmpK37	CAA09666.1	AJ011502.1	General Bacterial Porin with reduced permeability to beta-lactams	carbapenem;cephalosporin;cephamycin;monobactam;penam;penem	reduced permeability to antibiotic	OD2	Mucosa	AscendingColon	"Klebsiella pneumoniae outer membrane porin protein. Is preferentially detected in porin-deficient strains. Functional characterization of this new porin revealed a narrower pore than those of porins OmpK35 and OmpK36, which did not allow penetration by certain beta-lactams. Also, when a resistant strain expresses porin OmpK37 is less susceptible to cefotaxime and cefoxitin than when it is expres…
ODIWGS16	ARO:3000194	53	tet(W)	CAA10975.1	AJ222769.3	tetracycline-resistant ribosomal protection protein	tetracycline antibiotic	antibiotic target protection	OD2	Mucosa	AscendingColon	"Tet(W) is a ribosomal protection protein. It is associated with both conjugative and non conjugative DNA and has been found strains of Clostridioides difficile."
ODIWGS16	ARO:3004659	25	Mef(En2)	AAF74725.1	AF251288.1	major facilitator superfamily (MFS) antibiotic efflux pump	macrolide antibiotic	antibiotic efflux	OD2	Mucosa	AscendingColon	"NBU2-encoded resistance gene. An MefE homolog in Bacteroides species. Macrolide efflux MFS transporter."
ODIWGS16	ARO:3002871	34	tet(37)	AAN28721.1	AF540889.1	tetracycline inactivation enzyme	tetracycline antibiotic	antibiotic inactivation	OD2	Mucosa	AscendingColon	"tet(37) is a chromosome-encoded oxidoreductase isolated from an uncultured bacterium that confers resistance to tetracycline."
ODIWGS16	ARO:3000191	160	tet(Q)	CAA79727.1	Z21523.1	tetracycline-resistant ribosomal protection protein	tetracycline antibiotic	antibiotic target protection	OD2	Mucosa	AscendingColon	"Tet(Q) is a ribosomal protection protein. Its gene is associated with a conjugative transposon and has been found in both Gram-positive and Gram-negative bacteria."
ODIWGS16	ARO:3005044	59	OmpA	CDO13836.1	FO834906.1	General Bacterial Porin with reduced permeability to peptide antibiotics	peptide antibiotic	reduced permeability to antibiotic	OD2	Mucosa	AscendingColon	"OmpA is a porin that confers resistance to beta-lactam antibiotics."
ODIWGS16	ARO:3004588	26	Kpne_KpnG	EHL92831.1	ACWO01000051.1	major facilitator superfamily (MFS) antibiotic efflux pump	aminoglycoside antibiotic;carbapenem;cephalosporin;fluoroquinolone antibiotic;macrolide antibiotic;penam;penem;peptide antibiotic	antibiotic efflux	OD2	Mucosa	AscendingColon	"KpnG consists of ~390 residues and resembles EmrA of E. coli. Disruption of the pump components KpnG-KpnH signficantly decrease resistance to azithromycin, ceftazidime, ciprofloxacin, ertapenem, erythromycin, gentamicin, imipenem, ticarcillin, norfloxacin, polymyxin-B, piperacillin, spectinomycin, tobramycin, and streptomycin."
ODIWGS16	ARO:3003922	21	oqxA	AAP43109.1	EU370913.1	resistance-nodulation-cell division (RND) antibiotic efflux pump	diaminopyrimidine antibiotic;fluoroquinolone antibiotic;glycylcycline;nitrofuran antibiotic;tetracycline antibiotic	antibiotic efflux	OD2	Mucosa	AscendingColon	"RND efflux pump conferring resistance to fluoroquinolone."
ODIWGS16	ARO:3004041	21	Kpne_acrA	CAC41008.1	AJ318073.1	resistance-nodulation-cell division (RND) antibiotic efflux pump	cephalosporin;disinfecting agents and antiseptics;fluoroquinolone antibiotic;glycylcycline;penam;phenicol antibiotic;rifamycin antibiotic;tetracycline antibiotic	antibiotic efflux	OD2	Mucosa	AscendingColon	"AcrA is a subunit of the AcrAB multidrug efflux system that in K. pneumoniae, which is encoded by the acrRAB operon."
ODIWGS16	ARO:3003002	16	CfxA2	AAD23513.1	AF118110.1	CfxA beta-lactamase	cephamycin	antibiotic inactivation	OD2	Mucosa	AscendingColon	"CfxA2 beta-lactamase is a class A beta-lactamase found in Prevotella intermedia."
ODIWGS16	ARO:3000205	29	tet(X)	AAA27471.1	M37699.1	tetracycline inactivation enzyme	glycylcycline;tetracycline antibiotic	antibiotic inactivation	OD2	Mucosa	AscendingColon	"Tet(X) is a flavin-dependent monooxygenase conferring resistance to tetracycline antibiotics. Tet(X) hydroxylates position 11a of the tetraketide group thus inactivating the antibiotic."
ODIWGS16	ARO:3005166	125	tet(X1)	CAC47933.1	AJ311171.1	tetracycline inactivation enzyme	tetracycline antibiotic	antibiotic inactivation	OD2	Mucosa	AscendingColon	"Tetracycline resistance gene tet(X) ortholog described by Fang et al. 2020."
ODIWGS16	ARO:3000190	36	tet(O)	AAA23033.2	M18896.2	tetracycline-resistant ribosomal protection protein	tetracycline antibiotic	antibiotic target protection	OD2	Mucosa	AscendingColon	"Tet(O) is a ribosomal protection protein. It is associated with conjugative plasmids."
ODIWGS16	ARO:3005053	60	ArnT	CDO12042.1	FO834906.1	pmr phosphoethanolamine transferase	peptide antibiotic	antibiotic target alteration	OD2	Mucosa	AscendingColon	"ArnT is involved in Cell Wall Biosynthesis, specifically 4-amino-4-deoxy-L-arabinose (Ara4N). It confers resistance to peptide antibiotics."
ODIWGS16	ARO:3003923	197	oqxB	AAP43110.2	EU370913.1	resistance-nodulation-cell division (RND) antibiotic efflux pump	diaminopyrimidine antibiotic;fluoroquinolone antibiotic;glycylcycline;nitrofuran antibiotic;tetracycline antibiotic	antibiotic efflux	OD2	Mucosa	AscendingColon	"RND efflux pump conferring resistance to fluoroquinolone."
ODIWGS17	ARO:3003839	23	Mrx	AAS13767.1	AY522923.1	macrolide phosphotransferase (MPH)	macrolide antibiotic	antibiotic inactivation	OD5	Lumen	AscendingColon	"Mrx is part of the macrolide inactivation gene cluster in Aeromonas hydrophila."
ODIWGS18	ARO:3000186	867	tet(M)	BAB82500.1	AB039845.1	tetracycline-resistant ribosomal protection protein	tetracycline antibiotic	antibiotic target protection	OD5	Mucosa	DescendingColon	"Tet(M) is a ribosomal protection protein that confers tetracycline resistance. It is found on transposable DNA elements and its horizontal transfer between bacterial species has been documented."
ODIWGS18	ARO:3000616	603	mel	AAL73129.1	AF227521.1	msr-type ABC-F protein	macrolide antibiotic;streptogramin antibiotic	antibiotic target protection	OD5	Mucosa	DescendingColon	"Mel, a homolog of MsrA, is an ABC-F subfamily protein associated with macrolide resistance. It is expressed on the same operon as mefA and mefE, both MFS-type efflux proteins that confer macrolide resistance."
ODIWGS18	ARO:3000074	90	emrB	AAC75733.1	U00096.1	major facilitator superfamily (MFS) antibiotic efflux pump	fluoroquinolone antibiotic	antibiotic efflux	OD5	Mucosa	DescendingColon	"emrB is a translocase in the emrB -TolC efflux protein in E. coli. It recognizes substrates including carbonyl cyanide m-chlorophenylhydrazone (CCCP), nalidixic acid, and thioloactomycin."
ODIWGS18	ARO:3000237	27	TolC	ACN32294.1	FJ768952.1	ATP-binding cassette (ABC) antibiotic efflux pump;major facilitator superfamily (MFS) antibiotic efflux pump;resistance-nodulation-cell division (RND) antibiotic efflux pump	aminocoumarin antibiotic;aminoglycoside antibiotic;carbapenem;cephalosporin;cephamycin;disinfecting agents and antiseptics;fluoroquinolone antibiotic;glycylcycline;macrolide antibiotic;penam;penem;peptide antibiotic;phenicol antibiotic;rifamycin antibiotic;tetracycline antibiotic	antibiotic efflux	OD5	Mucosa	DescendingColon	"TolC is a protein subunit of many multidrug efflux complexes in Gram negative bacteria. It is an outer membrane efflux protein and is constitutively open. Regulation of efflux activity is often at its periplasmic entrance by other components of the efflux complex."
ODIWGS18	ARO:3000796	75	mdtF	AAC76539.1	U00096.1	resistance-nodulation-cell division (RND) antibiotic efflux pump	fluoroquinolone antibiotic;macrolide antibiotic;penam	antibiotic efflux	OD5	Mucosa	DescendingColon	"MdtF is the multidrug inner membrane transporter for the MdtEF-TolC efflux complex."
ODIWGS18	ARO:3007120	90	tet(O/M/O)	AAR29485.1	AY394560.1	tetracycline-resistant ribosomal protection protein	tetracycline antibiotic	antibiotic target protection	OD5	Mucosa	DescendingColon	"Tet(O/M/O) is a mosaic tetracycline resistance gene and ribosomal protection protein."
ODIWGS18	ARO:3004442	120	tet(W/N/W)	AMP42147.1	KU736867.1	tetracycline-resistant ribosomal protection protein	tetracycline antibiotic	antibiotic target protection	OD5	Mucosa	DescendingColon	"tet(W/N/W) is a mosaic tetracycline resistance gene and ribosomal protection protein."
ODIWGS18	ARO:3000194	1002	tet(W)	CAA10975.1	AJ222769.3	tetracycline-resistant ribosomal protection protein	tetracycline antibiotic	antibiotic target protection	OD5	Mucosa	DescendingColon	"Tet(W) is a ribosomal protection protein. It is associated with both conjugative and non conjugative DNA and has been found strains of Clostridioides difficile."
ODIWGS18	ARO:3003982	4494	LlmA_23S_CLI	APB03216.1	KX531046.1	Llm 23S ribosomal RNA methyltransferase	lincosamide antibiotic	antibiotic target alteration	OD5	Mucosa	DescendingColon	"Lincosamide (Clindamycin) resistant (putative) ribosomal methyltransferase related to the RlmK 23S rRNA methyltransferase COG family. Detected in Paenibacillus sp. LC231, an isolated strain of Paenibacillus found in Lechuguilla Cave, NM, USA. Described by Pawlowski et al. 2016."
ODIWGS18	ARO:3002871	103	tet(37)	AAN28721.1	AF540889.1	tetracycline inactivation enzyme	tetracycline antibiotic	antibiotic inactivation	OD5	Mucosa	DescendingColon	"tet(37) is a chromosome-encoded oxidoreductase isolated from an uncultured bacterium that confers resistance to tetracycline."
ODIWGS18	ARO:3007047	110	mefH	QQM99829.1	MW269960.1	major facilitator superfamily (MFS) antibiotic efflux pump	macrolide antibiotic	antibiotic efflux	OD5	Mucosa	DescendingColon	"mefH is an mef efflux pump protein."
ODIWGS18	ARO:3000191	3329	tet(Q)	CAA79727.1	Z21523.1	tetracycline-resistant ribosomal protection protein	tetracycline antibiotic	antibiotic target protection	OD5	Mucosa	DescendingColon	"Tet(Q) is a ribosomal protection protein. Its gene is associated with a conjugative transposon and has been found in both Gram-positive and Gram-negative bacteria."
ODIWGS18	ARO:3003730	25614	Bbif_ileS_MUP	ADP36409.1	CP001840.1	antibiotic-resistant isoleucyl-tRNA synthetase (ileS)	mupirocin-like antibiotic	antibiotic target alteration	OD5	Mucosa	DescendingColon	"Bifidobacteria have an intrinsically resistant form of ileS (isoleucyl-tRNA synthetase) that confers resistance to mupirocin."
ODIWGS18	ARO:3002837	26	lnuC	AAY32951.1	AY928180.1	lincosamide nucleotidyltransferase (LNU)	lincosamide antibiotic	antibiotic inactivation	OD5	Mucosa	DescendingColon	"lnuC is a transposon-mediated nucleotidyltransferase found in Streptococcus agalactiae."
ODIWGS18	ARO:3004038	11	Paer_emrE	AAG08375.1	AE004091.2	small multidrug resistance (SMR) antibiotic efflux pump	aminoglycoside antibiotic	antibiotic efflux	OD5	Mucosa	DescendingColon	"EmrE is a small multidrug transporter that functions as a homodimer and that couples the efflux of small polyaromatic cations from the cell with the import of protons down an electrochemical gradient. Confers resistance to tetraphenylphosphonium, methyl viologen, gentamicin, kanamycin, and neomycin."
ODIWGS18	ARO:3005044	16	OmpA	CDO13836.1	FO834906.1	General Bacterial Porin with reduced permeability to peptide antibiotics	peptide antibiotic	reduced permeability to antibiotic	OD5	Mucosa	DescendingColon	"OmpA is a porin that confers resistance to beta-lactam antibiotics."
ODIWGS18	ARO:3000768	13	abeS	ACJ59254.1	CP001172.1	small multidrug resistance (SMR) antibiotic efflux pump	aminocoumarin antibiotic;macrolide antibiotic	antibiotic efflux	OD5	Mucosa	DescendingColon	"AbeS in an efflux pump of the SMR family of transporters found in Acinetobacter baumannii."
ODIWGS18	ARO:3002867	96	dfrF	AAD01868.1	AF028812.1	trimethoprim resistant dihydrofolate reductase dfr	diaminopyrimidine antibiotic	antibiotic target replacement	OD5	Mucosa	DescendingColon	"dfrF is a chromosome-encoded dihydrofolate reductase found in Streptococcus pyogenes."
ODIWGS18	ARO:3007121	146	tet(O/W)	AAR29969.1	AY485122.1	tetracycline-resistant ribosomal protection protein	tetracycline antibiotic	antibiotic target protection	OD5	Mucosa	DescendingColon	"Tet(O/W) is a mosaic tetracycline resistance gene and ribosomal protection protein."
ODIWGS18	ARO:3004480	42913	Bado_rpoB_RIF	WP_041777404.1	NC_008618.1	rifamycin-resistant beta-subunit of RNA polymerase (rpoB)	peptide antibiotic;rifamycin antibiotic	antibiotic target alteration;antibiotic target replacement	OD5	Mucosa	DescendingColon	"Bifidobacterium are antibiotic resistant probiotics are prescribed to upkeep the population beneficial bacteria in the gut microbiome. However, horizontal gene transfer among gut microbes could create harmful antibiotic-resistant pathogenic bacteria, such as Mycobacterium tuberculosis. Lokesh et al. analyzed Bifidobacterium antitubercular drug resistance and mutations in rpoB. They found that B.…
ODIWGS18	ARO:3000195	2983	tetB(P)	AAA20117.1	L20800.1	tetracycline-resistant ribosomal protection protein	tetracycline antibiotic	antibiotic target protection	OD5	Mucosa	DescendingColon	"TetB(P) is a tetracycline ribosomal protection protein found on the same operon as tetA(P), a tetracycline efflux protein."
ODIWGS18	ARO:3007124	1046	tet(W/32/O)	AAL09826.1	AY049983.2	tetracycline-resistant ribosomal protection protein	tetracycline antibiotic	antibiotic target protection	OD5	Mucosa	DescendingColon	"Tet(W/32/O) is a mosaic tetracycline resistance gene and ribosomal protection protein."
ODIWGS18	ARO:3002882	24734	lmrD	AYV52072.1	CP033607.1	ATP-binding cassette (ABC) antibiotic efflux pump	lincosamide antibiotic	antibiotic efflux	OD5	Mucosa	DescendingColon	"lmrD is a chromosomally-encoded efflux pump that confers resistance to lincosamides in Streptomyces lincolnensis and Lactococcus lactis. It can dimerize with lmrC."
ODIWGS18	ARO:3000196	1645	tet(32)	ACH87088.1	EU722333.1	tetracycline-resistant ribosomal protection protein	tetracycline antibiotic	antibiotic target protection	OD5	Mucosa	DescendingColon	"Tet(32) is a tetracycline resistance gene similar to Tet(O), and binds to the ribosome to confer tetracycline resistance as a ribosomal protection protein."
ODIWGS18	ARO:3000567	788	tet(40)	CAM12479.1	AM419751.1	major facilitator superfamily (MFS) antibiotic efflux pump	tetracycline antibiotic	antibiotic efflux	OD5	Mucosa	DescendingColon	"Tet40 is a tetracycline efflux pump found in the Gram-positive Clostridium. It is similar to tetA(P)."
ODIWGS18	ARO:3004253	234	vanU_in_vanG_cl	ABA71726.1	DQ212986.1	glycopeptide resistance gene cluster;vanU	glycopeptide antibiotic	antibiotic target alteration	OD5	Mucosa	DescendingColon	"Also known as vanUG, is a vanG variant found in the vanG gene cluster."
ODIWGS18	ARO:3002897	10	SAT-4	AAB53445.1	U01945.1	streptothricin acetyltransferase (SAT)	nucleoside antibiotic	antibiotic inactivation	OD5	Mucosa	DescendingColon	"SAT-4 is a plasmid-mediated streptothricin acetyltransferase and streptothricin (a nucleoside antibiotic) resistant determinant. Originally described from a Campylobacter coli BE/G4 plasmid gene sequence by Jacob et al, 1994."
ODIWGS18	ARO:3007122	167	tet(O/W/32/O)	ABF69686.1	DQ525023.1	tetracycline-resistant ribosomal protection protein	tetracycline antibiotic	antibiotic target protection	OD5	Mucosa	DescendingColon	"Tet(O/W/32/O) is a mosaic tetracycline resistance gene and ribosomal protection protein."
ODIWGS18	ARO:3003063	13	ykkC	CAB13166.1	AL009126.1	small multidrug resistance (SMR) antibiotic efflux pump	aminoglycoside antibiotic;phenicol antibiotic;tetracycline antibiotic	antibiotic efflux	OD5	Mucosa	DescendingColon	"ykkC is an SMR-type protein that is a subunit of the ykkCD efflux pump."
ODIWGS18	ARO:3005166	11	tet(X1)	CAC47933.1	AJ311171.1	tetracycline inactivation enzyme	tetracycline antibiotic	antibiotic inactivation	OD5	Mucosa	DescendingColon	"Tetracycline resistance gene tet(X) ortholog described by Fang et al. 2020."
ODIWGS18	ARO:3003064	11	ykkD	CAB13167.1	AL009126.1	small multidrug resistance (SMR) antibiotic efflux pump	aminoglycoside antibiotic;phenicol antibiotic;tetracycline antibiotic	antibiotic efflux	OD5	Mucosa	DescendingColon	"ykkD is an SMR-type protein that is a subunit of the ykkCD efflux pump."
ODIWGS18	ARO:3005069	23	rsmA	AAC16242.1	AF061757.1	resistance-nodulation-cell division (RND) antibiotic efflux pump	diaminopyrimidine antibiotic;fluoroquinolone antibiotic;phenicol antibiotic	antibiotic efflux	OD5	Mucosa	DescendingColon	"rsmA is a gene that regulates virulence of Pseudomonas aeruginosa. However, its negative effect on MexEF-OprN overexpression has been noted to confer resistance to various antibiotics. It's Escherichia coli homolog is csrA."
ODIWGS18	ARO:3002628	15	aad(6)	AAU10334.1	AY712687.1	ANT(6)	aminoglycoside antibiotic	antibiotic inactivation	OD5	Mucosa	DescendingColon	"ANT(6)-Ia/aad(6) is a plasmid-encoded aminoglycoside nucleotidyltransferase gene in E. faecalis and Streptococcus oralis."
ODIWGS18	ARO:3000190	1359	tet(O)	AAA23033.2	M18896.2	tetracycline-resistant ribosomal protection protein	tetracycline antibiotic	antibiotic target protection	OD5	Mucosa	DescendingColon	"Tet(O) is a ribosomal protection protein. It is associated with conjugative plasmids."
ODIWGS18	ARO:3002647	65	APH(3')-IIIa	AGV10830.1	CP004067.1	APH(3')	aminoglycoside antibiotic	antibiotic inactivation	OD5	Mucosa	DescendingColon	"APH(3')-IIIa is a plasmid-encoded aminoglycoside phosphotransferase in S. aureus and Enterococcus spp."
ODIWGS18	ARO:3000245	167	RbpA	ADV91011.1	HQ203032.1	RbpA bacterial RNA polymerase-binding protein	rifamycin antibiotic	antibiotic target protection	OD5	Mucosa	DescendingColon	"RNA-polymerase binding protein which confers resistance to rifampin."
ODIWGS18	ARO:3003923	92	oqxB	AAP43110.2	EU370913.1	resistance-nodulation-cell division (RND) antibiotic efflux pump	diaminopyrimidine antibiotic;fluoroquinolone antibiotic;glycylcycline;nitrofuran antibiotic;tetracycline antibiotic	antibiotic efflux	OD5	Mucosa	DescendingColon	"RND efflux pump conferring resistance to fluoroquinolone."
ODIWGS18	ARO:3000027	19	emrA	BAA16547.1	AP009048.1	major facilitator superfamily (MFS) antibiotic efflux pump	fluoroquinolone antibiotic	antibiotic efflux	OD5	Mucosa	DescendingColon	"EmrA is a membrane fusion protein, providing an efflux pathway with EmrB and TolC between the inner and outer membranes of E. coli, a Gram-negative bacterium."
ODIWGS18	ARO:3007119	750	tet(O/32/O)	CAC41371.2	AJ295238.3	tetracycline-resistant ribosomal protection protein	tetracycline antibiotic	antibiotic target protection	OD5	Mucosa	DescendingColon	"Tet(O/32/O) is a mosaic tetracycline resistance gene and ribosomal protection protein."
ODIWGS18	ARO:3000316	40	mphA	BAA03776.1	D16251.1	macrolide phosphotransferase (MPH)	macrolide antibiotic	antibiotic inactivation	OD5	Mucosa	DescendingColon	"The mphA gene encodes for resistance enzyme MPH(2')-I which preferentially inactivate 14-membered macrolides (e.g.erythromycin, telithromycin, roxithromycin) over 16-membered macrolides (e.g.tylosin, spiramycin). It phosphorylates macrolides at 2'-OH hydroxyl of desosamine sugar of macrolides in a GTP-dependent manner."
ODIWGS18	ARO:3003839	19	Mrx	AAS13767.1	AY522923.1	macrolide phosphotransferase (MPH)	macrolide antibiotic	antibiotic inactivation	OD5	Mucosa	DescendingColon	"Mrx is part of the macrolide inactivation gene cluster in Aeromonas hydrophila."
ODIWGS18	ARO:3005040	78	YajC	TKW44661.1	VAOQ01003483.1	resistance-nodulation-cell division (RND) antibiotic efflux pump	cephalosporin;disinfecting agents and antiseptics;fluoroquinolone antibiotic;glycopeptide antibiotic;glycylcycline;oxazolidinone antibiotic;penam;phenicol antibiotic;rifamycin antibiotic;tetracycline antibiotic	antibiotic efflux	OD5	Mucosa	DescendingColon	"YajC interacts with the AcrAB-TolC efflux pump in a way that in uncharacterized but is shown to grant increased fitness in the presence of linezolid, rifampicin, and vancomycin."
ODIWGS22	ARO:3000822	120	pmrA	AAK99679.1	AE007317.1	major facilitator superfamily (MFS) antibiotic efflux pump	fluoroquinolone antibiotic	antibiotic efflux	OD7	Lumen	TransverseColon	"PmrA is a MFS-type efflux pump expressed in Streptococcus pneumoniae that confers low-level resistance to norfloxacin, ciprofloxacin, and acriflavine."
ODIWGS22	ARO:3004480	786	Bado_rpoB_RIF	WP_041777404.1	NC_008618.1	rifamycin-resistant beta-subunit of RNA polymerase (rpoB)	peptide antibiotic;rifamycin antibiotic	antibiotic target alteration;antibiotic target replacement	OD7	Lumen	TransverseColon	"Bifidobacterium are antibiotic resistant probiotics are prescribed to upkeep the population beneficial bacteria in the gut microbiome. However, horizontal gene transfer among gut microbes could create harmful antibiotic-resistant pathogenic bacteria, such as Mycobacterium tuberculosis. Lokesh et al. analyzed Bifidobacterium antitubercular drug resistance and mutations in rpoB. They found that B.…
ODIWGS22	ARO:3002630	20	ANT(9)-Ia	CAA26428.1	X02588.1	ANT(9)	aminoglycoside antibiotic	antibiotic inactivation	OD7	Lumen	TransverseColon	"ANT(9)-Ia is an aminoglycoside nucleotidyltransferase encoded by plasmids and transposons in S. aureus, Enterococcus spp., Mammaliicoccus sciuri, and E. faecalis."
ODIWGS23	ARO:3003905	23	ANT(4')-Ib	ADA62098.1	GQ900432.1	ANT(4')	aminoglycoside antibiotic	antibiotic inactivation	OD1	Lumen	TransverseColon	"Aminoglycoside nucleotidyltransferase sequence from Staphylococcus aureus plasmid."
ODIWGS24	ARO:3000186	123	tet(M)	BAB82500.1	AB039845.1	tetracycline-resistant ribosomal protection protein	tetracycline antibiotic	antibiotic target protection	OD9	Lumen	Jejunum	"Tet(M) is a ribosomal protection protein that confers tetracycline resistance. It is found on transposable DNA elements and its horizontal transfer between bacterial species has been documented."
ODIWGS24	ARO:3002966	37	vanXY_in_vanC	AAF61331.1	AF162694.1	glycopeptide resistance gene cluster;vanXY	glycopeptide antibiotic	antibiotic target alteration	OD9	Lumen	Jejunum	"Also known as vanXYC, is a vanXY variant found in the vanC gene cluster."
ODIWGS24	ARO:3007120	15	tet(O/M/O)	AAR29485.1	AY394560.1	tetracycline-resistant ribosomal protection protein	tetracycline antibiotic	antibiotic target protection	OD9	Lumen	Jejunum	"Tet(O/M/O) is a mosaic tetracycline resistance gene and ribosomal protection protein."
ODIWGS24	ARO:3004442	20	tet(W/N/W)	AMP42147.1	KU736867.1	tetracycline-resistant ribosomal protection protein	tetracycline antibiotic	antibiotic target protection	OD9	Lumen	Jejunum	"tet(W/N/W) is a mosaic tetracycline resistance gene and ribosomal protection protein."
ODIWGS24	ARO:3003954	73	efmA	BAG75524.1	AB467372.1	major facilitator superfamily (MFS) antibiotic efflux pump	fluoroquinolone antibiotic;macrolide antibiotic	antibiotic efflux	OD9	Lumen	Jejunum	"efmA is an MFS transporter permease in E. faecium."
ODIWGS24	ARO:3000194	154	tet(W)	CAA10975.1	AJ222769.3	tetracycline-resistant ribosomal protection protein	tetracycline antibiotic	antibiotic target protection	OD9	Lumen	Jejunum	"Tet(W) is a ribosomal protection protein. It is associated with both conjugative and non conjugative DNA and has been found strains of Clostridioides difficile."
ODIWGS24	ARO:3002837	10	lnuC	AAY32951.1	AY928180.1	lincosamide nucleotidyltransferase (LNU)	lincosamide antibiotic	antibiotic inactivation	OD9	Lumen	Jejunum	"lnuC is a transposon-mediated nucleotidyltransferase found in Streptococcus agalactiae."
ODIWGS24	ARO:3002867	32	dfrF	AAD01868.1	AF028812.1	trimethoprim resistant dihydrofolate reductase dfr	diaminopyrimidine antibiotic	antibiotic target replacement	OD9	Lumen	Jejunum	"dfrF is a chromosome-encoded dihydrofolate reductase found in Streptococcus pyogenes."
ODIWGS24	ARO:3007121	21	tet(O/W)	AAR29969.1	AY485122.1	tetracycline-resistant ribosomal protection protein	tetracycline antibiotic	antibiotic target protection	OD9	Lumen	Jejunum	"Tet(O/W) is a mosaic tetracycline resistance gene and ribosomal protection protein."
ODIWGS24	ARO:3000196	230	tet(32)	ACH87088.1	EU722333.1	tetracycline-resistant ribosomal protection protein	tetracycline antibiotic	antibiotic target protection	OD9	Lumen	Jejunum	"Tet(32) is a tetracycline resistance gene similar to Tet(O), and binds to the ribosome to confer tetracycline resistance as a ribosomal protection protein."
ODIWGS24	ARO:3007122	32	tet(O/W/32/O)	ABF69686.1	DQ525023.1	tetracycline-resistant ribosomal protection protein	tetracycline antibiotic	antibiotic target protection	OD9	Lumen	Jejunum	"Tet(O/W/32/O) is a mosaic tetracycline resistance gene and ribosomal protection protein."
ODIWGS24	ARO:3000190	156	tet(O)	AAA23033.2	M18896.2	tetracycline-resistant ribosomal protection protein	tetracycline antibiotic	antibiotic target protection	OD9	Lumen	Jejunum	"Tet(O) is a ribosomal protection protein. It is associated with conjugative plasmids."
ODIWGS24	ARO:3002970	53	vanT_in_vanC_cl	AAD22403.1	AF162694.1	glycopeptide resistance gene cluster;vanT	glycopeptide antibiotic	antibiotic target alteration	OD9	Lumen	Jejunum	"Also known as vanTC, is a vanT variant found in the vanC gene cluster."
ODIWGS24	ARO:3000368	36	vanC	AAA24786.1	AF162694.1	Van ligase;glycopeptide resistance gene cluster	glycopeptide antibiotic	antibiotic target alteration	OD9	Lumen	Jejunum	"VanC is a D-Ala-D-Ala ligase homolog that synthesizes D-Ala-D-Ser, an alternative substrate for peptidoglycan synthesis that reduces vancomycin binding affinity. It is specific to Enterococcus gallinarum and E. casseliflavus, providing intrinsic resistance."
ODIWGS24	ARO:3002933	115	vanS_in_vanC_cl	AAF86642.1	AF162694.1	glycopeptide resistance gene cluster;vanS	glycopeptide antibiotic	antibiotic target alteration	OD9	Lumen	Jejunum	"Also known as vanSC, is a vanS variant found in the vanC gene cluster."
ODIWGS24	ARO:3007119	57	tet(O/32/O)	CAC41371.2	AJ295238.3	tetracycline-resistant ribosomal protection protein	tetracycline antibiotic	antibiotic target protection	OD9	Lumen	Jejunum	"Tet(O/32/O) is a mosaic tetracycline resistance gene and ribosomal protection protein."
ODIWGS24	ARO:3000375	13	ErmB	AAF86219.1	AF242872.1	Erm 23S ribosomal RNA methyltransferase	lincosamide antibiotic;macrolide antibiotic;streptogramin A antibiotic;streptogramin B antibiotic;streptogramin antibiotic	antibiotic target alteration	OD9	Lumen	Jejunum	"ErmB confers the MLSb phenotype. Similar to ErmC, expression of ErmB is inducible by erythromycin. The leader peptide causes attenuation of the mRNA and stabilizes the structure preventing further translation. When erythromycin is present, it binds the leader peptide causing a change in conformation allowing for the expression of ErmB."
ODIWGS25	ARO:3000190	19	tet(O)	AAA23033.2	M18896.2	tetracycline-resistant ribosomal protection protein	tetracycline antibiotic	antibiotic target protection	OD8	Mucosa	DescendingColon	"Tet(O) is a ribosomal protection protein. It is associated with conjugative plasmids."
ODIWGS25	ARO:3003839	26	Mrx	AAS13767.1	AY522923.1	macrolide phosphotransferase (MPH)	macrolide antibiotic	antibiotic inactivation	OD8	Mucosa	DescendingColon	"Mrx is part of the macrolide inactivation gene cluster in Aeromonas hydrophila."
ODIWGS25	ARO:3005047	53	eptB	CCI79240.1	FO203501.1	pmr phosphoethanolamine transferase	peptide antibiotic	antibiotic target alteration	OD8	Mucosa	DescendingColon	"eptB is a phosphoethanolamine transferase. It confers resistance to peptide antibiotics."
ODIWGS25	ARO:3000375	28	ErmB	AAF86219.1	AF242872.1	Erm 23S ribosomal RNA methyltransferase	lincosamide antibiotic;macrolide antibiotic;streptogramin A antibiotic;streptogramin B antibiotic;streptogramin antibiotic	antibiotic target alteration	OD8	Mucosa	DescendingColon	"ErmB confers the MLSb phenotype. Similar to ErmC, expression of ErmB is inducible by erythromycin. The leader peptide causes attenuation of the mRNA and stabilizes the structure preventing further translation. When erythromycin is present, it binds the leader peptide causing a change in conformation allowing for the expression of ErmB."
ODIWGS25	ARO:3000191	73	tet(Q)	CAA79727.1	Z21523.1	tetracycline-resistant ribosomal protection protein	tetracycline antibiotic	antibiotic target protection	OD8	Mucosa	DescendingColon	"Tet(Q) is a ribosomal protection protein. Its gene is associated with a conjugative transposon and has been found in both Gram-positive and Gram-negative bacteria."
ODIWGS25	ARO:3000194	17	tet(W)	CAA10975.1	AJ222769.3	tetracycline-resistant ribosomal protection protein	tetracycline antibiotic	antibiotic target protection	OD8	Mucosa	DescendingColon	"Tet(W) is a ribosomal protection protein. It is associated with both conjugative and non conjugative DNA and has been found strains of Clostridioides difficile."
ODIWGS25	ARO:3005053	24	ArnT	CDO12042.1	FO834906.1	pmr phosphoethanolamine transferase	peptide antibiotic	antibiotic target alteration	OD8	Mucosa	DescendingColon	"ArnT is involved in Cell Wall Biosynthesis, specifically 4-amino-4-deoxy-L-arabinose (Ara4N). It confers resistance to peptide antibiotics."
ODIWGS25	ARO:3005044	16	OmpA	CDO13836.1	FO834906.1	General Bacterial Porin with reduced permeability to peptide antibiotics	peptide antibiotic	reduced permeability to antibiotic	OD8	Mucosa	DescendingColon	"OmpA is a porin that confers resistance to beta-lactam antibiotics."
ODIWGS27	ARO:3003549	230	mdtO	BAE78083.1	AP009048.1	major facilitator superfamily (MFS) antibiotic efflux pump	disinfecting agents and antiseptics;nucleoside antibiotic	antibiotic efflux	OD8	Mucosa	TransverseColon	"Multidrug resistance efflux pump. Could be involved in resistance to puromycin, acriflavine and tetraphenylarsonium chloride."
ODIWGS27	ARO:3000793	375	mdtB	AAC75136.1	U00096.1	resistance-nodulation-cell division (RND) antibiotic efflux pump	aminocoumarin antibiotic	antibiotic efflux	OD8	Mucosa	TransverseColon	"MdtB is a transporter that forms a heteromultimer complex with MdtC to form a multidrug transporter. MdtBC is part of the MdtABC-TolC efflux complex."
ODIWGS27	ARO:3000237	99	TolC	ACN32294.1	FJ768952.1	ATP-binding cassette (ABC) antibiotic efflux pump;major facilitator superfamily (MFS) antibiotic efflux pump;resistance-nodulation-cell division (RND) antibiotic efflux pump	aminocoumarin antibiotic;aminoglycoside antibiotic;carbapenem;cephalosporin;cephamycin;disinfecting agents and antiseptics;fluoroquinolone antibiotic;glycylcycline;macrolide antibiotic;penam;penem;peptide antibiotic;phenicol antibiotic;rifamycin antibiotic;tetracycline antibiotic	antibiotic efflux	OD8	Mucosa	TransverseColon	"TolC is a protein subunit of many multidrug efflux complexes in Gram negative bacteria. It is an outer membrane efflux protein and is constitutively open. Regulation of efflux activity is often at its periplasmic entrance by other components of the efflux complex."
ODIWGS27	ARO:3000795	79	mdtE	BAE77781.1	AP009048.1	resistance-nodulation-cell division (RND) antibiotic efflux pump	fluoroquinolone antibiotic;macrolide antibiotic;penam	antibiotic efflux	OD8	Mucosa	TransverseColon	"MdtE is the membrane fusion protein of the MdtEF multidrug efflux complex. It shares 70% sequence similarity with AcrA."
ODIWGS27	ARO:3000796	259	mdtF	AAC76539.1	U00096.1	resistance-nodulation-cell division (RND) antibiotic efflux pump	fluoroquinolone antibiotic;macrolide antibiotic;penam	antibiotic efflux	OD8	Mucosa	TransverseColon	"MdtF is the multidrug inner membrane transporter for the MdtEF-TolC efflux complex."
ODIWGS27	ARO:3000830	172	cpxA	BAB38260.1	BA000007.3	resistance-nodulation-cell division (RND) antibiotic efflux pump	aminocoumarin antibiotic;aminoglycoside antibiotic	antibiotic efflux	OD8	Mucosa	TransverseColon	"CpxA is a membrane-localized sensor kinase that is activated by envelope stress. It starts a kinase cascade that activates CpxR, which promotes efflux complex expression."
ODIWGS27	ARO:3000194	70	tet(W)	CAA10975.1	AJ222769.3	tetracycline-resistant ribosomal protection protein	tetracycline antibiotic	antibiotic target protection	OD8	Mucosa	TransverseColon	"Tet(W) is a ribosomal protection protein. It is associated with both conjugative and non conjugative DNA and has been found strains of Clostridioides difficile."
ODIWGS27	ARO:3004659	47	Mef(En2)	AAF74725.1	AF251288.1	major facilitator superfamily (MFS) antibiotic efflux pump	macrolide antibiotic	antibiotic efflux	OD8	Mucosa	TransverseColon	"NBU2-encoded resistance gene. An MefE homolog in Bacteroides species. Macrolide efflux MFS transporter."
ODIWGS27	ARO:3002871	57	tet(37)	AAN28721.1	AF540889.1	tetracycline inactivation enzyme	tetracycline antibiotic	antibiotic inactivation	OD8	Mucosa	TransverseColon	"tet(37) is a chromosome-encoded oxidoreductase isolated from an uncultured bacterium that confers resistance to tetracycline."
ODIWGS27	ARO:3007047	17	mefH	QQM99829.1	MW269960.1	major facilitator superfamily (MFS) antibiotic efflux pump	macrolide antibiotic	antibiotic efflux	OD8	Mucosa	TransverseColon	"mefH is an mef efflux pump protein."
ODIWGS27	ARO:3000491	167	acrD	BAA16344.1	AP009048.1	resistance-nodulation-cell division (RND) antibiotic efflux pump	aminoglycoside antibiotic	antibiotic efflux	OD8	Mucosa	TransverseColon	"AcrD is an aminoglycoside efflux pump expressed in E. coli. Its expression can be induced by indole, and is regulated by baeRS and cpxAR."
ODIWGS27	ARO:3000191	333	tet(Q)	CAA79727.1	Z21523.1	tetracycline-resistant ribosomal protection protein	tetracycline antibiotic	antibiotic target protection	OD8	Mucosa	TransverseColon	"Tet(Q) is a ribosomal protection protein. Its gene is associated with a conjugative transposon and has been found in both Gram-positive and Gram-negative bacteria."
ODIWGS27	ARO:3003730	2280	Bbif_ileS_MUP	ADP36409.1	CP001840.1	antibiotic-resistant isoleucyl-tRNA synthetase (ileS)	mupirocin-like antibiotic	antibiotic target alteration	OD8	Mucosa	TransverseColon	"Bifidobacteria have an intrinsically resistant form of ileS (isoleucyl-tRNA synthetase) that confers resistance to mupirocin."
ODIWGS27	ARO:3000412	21	sul2	AAL59753.1	AY055428.1	sulfonamide resistant sul	sulfonamide antibiotic;sulfone antibiotic	antibiotic target replacement	OD8	Mucosa	TransverseColon	"Sul2 is a sulfonamide resistant dihydropteroate synthase of Gram-negative bacteria, usually found on small plasmids."
ODIWGS27	ARO:3004480	5601	Bado_rpoB_RIF	WP_041777404.1	NC_008618.1	rifamycin-resistant beta-subunit of RNA polymerase (rpoB)	peptide antibiotic;rifamycin antibiotic	antibiotic target alteration;antibiotic target replacement	OD8	Mucosa	TransverseColon	"Bifidobacterium are antibiotic resistant probiotics are prescribed to upkeep the population beneficial bacteria in the gut microbiome. However, horizontal gene transfer among gut microbes could create harmful antibiotic-resistant pathogenic bacteria, such as Mycobacterium tuberculosis. Lokesh et al. analyzed Bifidobacterium antitubercular drug resistance and mutations in rpoB. They found that B.…
ODIWGS27	ARO:3000828	520	baeR	BAA15935.1	AP009048.1	resistance-nodulation-cell division (RND) antibiotic efflux pump	aminocoumarin antibiotic;aminoglycoside antibiotic	antibiotic efflux	OD8	Mucosa	TransverseColon	"BaeR is a response regulator that promotes the expression of MdtABC and AcrD efflux complexes."
ODIWGS27	ARO:3000502	381	AcrF	AAC76298.1	U00096.1	resistance-nodulation-cell division (RND) antibiotic efflux pump	cephalosporin;cephamycin;fluoroquinolone antibiotic;penam	antibiotic efflux	OD8	Mucosa	TransverseColon	"AcrF is a inner membrane transporter, similar to AcrB."
ODIWGS27	ARO:3000518	39	CRP	BAE77933.1	AP009048.1	resistance-nodulation-cell division (RND) antibiotic efflux pump	fluoroquinolone antibiotic;macrolide antibiotic;penam	antibiotic efflux	OD8	Mucosa	TransverseColon	"CRP is a global regulator that represses MdtEF multidrug efflux pump expression."
ODIWGS27	ARO:3000567	78	tet(40)	CAM12479.1	AM419751.1	major facilitator superfamily (MFS) antibiotic efflux pump	tetracycline antibiotic	antibiotic efflux	OD8	Mucosa	TransverseColon	"Tet40 is a tetracycline efflux pump found in the Gram-positive Clostridium. It is similar to tetA(P)."
ODIWGS27	ARO:3004043	36	Ecol_acrA	AAC73565.1	U00096.3	resistance-nodulation-cell division (RND) antibiotic efflux pump	cephalosporin;disinfecting agents and antiseptics;fluoroquinolone antibiotic;glycylcycline;penam;phenicol antibiotic;rifamycin antibiotic;tetracycline antibiotic	antibiotic efflux	OD8	Mucosa	TransverseColon	"AcrA is a subunit of the AcrAB-TolC multidrug efflux system that in E. coli."
ODIWGS27	ARO:3003843	32	leuO	VWQ00850.1	LR730402.1	major facilitator superfamily (MFS) antibiotic efflux pump	disinfecting agents and antiseptics;nucleoside antibiotic	antibiotic efflux	OD8	Mucosa	TransverseColon	"leuO, a LysR family transcription factor, exists in a wide variety of bacteria of the family Enterobacteriaceae and is involved in the regulation of as yet unidentified genes affecting the stress response and pathogenesis expression. LeuO is also an activator of the MdtNOP efflux pump."
ODIWGS27	ARO:3004253	33	vanU_in_vanG_cl	ABA71726.1	DQ212986.1	glycopeptide resistance gene cluster;vanU	glycopeptide antibiotic	antibiotic target alteration	OD8	Mucosa	TransverseColon	"Also known as vanUG, is a vanG variant found in the vanG gene cluster."
ODIWGS27	ARO:3000516	40	emrR	AAC75731.1	U00096.3	major facilitator superfamily (MFS) antibiotic efflux pump	fluoroquinolone antibiotic	antibiotic efflux	OD8	Mucosa	TransverseColon	"EmrR is a negative regulator for the EmrAB-TolC multidrug efflux pump in E. coli. Mutations lead to EmrAB-TolC overexpression."
ODIWGS27	ARO:3003550	218	mdtP	BAE78082.1	AP009048.1	major facilitator superfamily (MFS) antibiotic efflux pump	disinfecting agents and antiseptics;nucleoside antibiotic	antibiotic efflux	OD8	Mucosa	TransverseColon	"Multidrug resistance efflux pump. Could be involved in resistance to puromycin, acriflavine and tetraphenylarsonium chloride."
ODIWGS27	ARO:3003836	11	qacH	CAA76544.1	Y16945.1	small multidrug resistance (SMR) antibiotic efflux pump	disinfecting agents and antiseptics	antibiotic efflux	OD8	Mucosa	TransverseColon	"qacH is a subunit of the qac multidrug efflux pump in Staphylococcus saprophyticus."
ODIWGS27	ARO:3000216	282	acrB	AAC73564.1	U00096.3	resistance-nodulation-cell division (RND) antibiotic efflux pump	cephalosporin;disinfecting agents and antiseptics;fluoroquinolone antibiotic;glycylcycline;penam;phenicol antibiotic;rifamycin antibiotic;tetracycline antibiotic	antibiotic efflux	OD8	Mucosa	TransverseColon	"Protein subunit of AcrA-AcrB-TolC multidrug efflux complex. AcrB functions as a herterotrimer which forms the inner membrane component and is primarily responsible for substrate recognition and energy transduction by acting as a drug/proton antiporter."
ODIWGS27	ARO:3000190	193	tet(O)	AAA23033.2	M18896.2	tetracycline-resistant ribosomal protection protein	tetracycline antibiotic	antibiotic target protection	OD8	Mucosa	TransverseColon	"Tet(O) is a ribosomal protection protein. It is associated with conjugative plasmids."
ODIWGS27	ARO:3004583	12	Kpne_KpnF	BAH63252.1	AP006725.1	small multidrug resistance (SMR) antibiotic efflux pump	aminoglycoside antibiotic;cephalosporin;disinfecting agents and antiseptics;macrolide antibiotic;peptide antibiotic;rifamycin antibiotic;tetracycline antibiotic	antibiotic efflux	OD8	Mucosa	TransverseColon	"KpnF subunit of KpnEF resembles EbrAB from E. coli. Mutation in KpnEF resulted in increased susceptibility to cefepime, ceftriaxon, colistin, erythromycin, rifampin, tetracycline, and streptomycin as well as enhanced sensitivity toward sodium dodecyl sulfate, deoxycholate, dyes, benzalkonium chloride, chlorhexidine, and triclosan."
ODIWGS27	ARO:3000499	38	AcrE	AAC76297.1	U00096.1	resistance-nodulation-cell division (RND) antibiotic efflux pump	cephalosporin;cephamycin;fluoroquinolone antibiotic;penam	antibiotic efflux	OD8	Mucosa	TransverseColon	"AcrE is a membrane fusion protein, similar to AcrA."
ODIWGS27	ARO:3002647	21	APH(3')-IIIa	AGV10830.1	CP004067.1	APH(3')	aminoglycoside antibiotic	antibiotic inactivation	OD8	Mucosa	TransverseColon	"APH(3')-IIIa is a plasmid-encoded aminoglycoside phosphotransferase in S. aureus and Enterococcus spp."
ODIWGS27	ARO:3000829	124	baeS	BAA15934.1	AP009048.1	resistance-nodulation-cell division (RND) antibiotic efflux pump	aminocoumarin antibiotic;aminoglycoside antibiotic	antibiotic efflux	OD8	Mucosa	TransverseColon	"BaeS is a sensor kinase in the BaeSR regulatory system. While it phosphorylates BaeR to increase its activity, BaeS is not necessary for overexpressed BaeR to confer resistance."
ODIWGS28	ARO:3000186	63	tet(M)	BAB82500.1	AB039845.1	tetracycline-resistant ribosomal protection protein	tetracycline antibiotic	antibiotic target protection	OD5	Lumen	TransverseColon	"Tet(M) is a ribosomal protection protein that confers tetracycline resistance. It is found on transposable DNA elements and its horizontal transfer between bacterial species has been documented."
ODIWGS28	ARO:3000988	441	TEM-126	AAT45742.1	AY628199.1	TEM beta-lactamase	cephalosporin;monobactam;penam;penem	antibiotic inactivation	OD5	Lumen	TransverseColon	"TEM-126 is an extended-spectrum beta-lactamase found in E. coli."
ODIWGS28	ARO:3000074	131	emrB	AAC75733.1	U00096.1	major facilitator superfamily (MFS) antibiotic efflux pump	fluoroquinolone antibiotic	antibiotic efflux	OD5	Lumen	TransverseColon	"emrB is a translocase in the emrB -TolC efflux protein in E. coli. It recognizes substrates including carbonyl cyanide m-chlorophenylhydrazone (CCCP), nalidixic acid, and thioloactomycin."
ODIWGS28	ARO:3000237	304	TolC	ACN32294.1	FJ768952.1	ATP-binding cassette (ABC) antibiotic efflux pump;major facilitator superfamily (MFS) antibiotic efflux pump;resistance-nodulation-cell division (RND) antibiotic efflux pump	aminocoumarin antibiotic;aminoglycoside antibiotic;carbapenem;cephalosporin;cephamycin;disinfecting agents and antiseptics;fluoroquinolone antibiotic;glycylcycline;macrolide antibiotic;penam;penem;peptide antibiotic;phenicol antibiotic;rifamycin antibiotic;tetracycline antibiotic	antibiotic efflux	OD5	Lumen	TransverseColon	"TolC is a protein subunit of many multidrug efflux complexes in Gram negative bacteria. It is an outer membrane efflux protein and is constitutively open. Regulation of efflux activity is often at its periplasmic entrance by other components of the efflux complex."
ODIWGS28	ARO:3000794	179	mdtC	AAC75137.1	U00096.1	resistance-nodulation-cell division (RND) antibiotic efflux pump	aminocoumarin antibiotic	antibiotic efflux	OD5	Lumen	TransverseColon	"MdtC is a transporter that forms a heteromultimer complex with MdtB to form a multidrug transporter. MdtBC is part of the MdtABC-TolC efflux complex. In the absence of MdtB, MdtC can form a homomultimer complex that results in a functioning efflux complex with a narrower drug specificity. mdtC corresponds to 3 loci in Pseudomonas aeruginosa PAO1 (gene name
ODIWGS28	ARO:3000263	56	marA	BAA15221.2	AP009048.1	General Bacterial Porin with reduced permeability to beta-lactams;resistance-nodulation-cell division (RND) antibiotic efflux pump	carbapenem;cephalosporin;cephamycin;disinfecting agents and antiseptics;fluoroquinolone antibiotic;glycylcycline;monobactam;penam;penem;phenicol antibiotic;rifamycin antibiotic;tetracycline antibiotic	antibiotic efflux;reduced permeability to antibiotic	OD5	Lumen	TransverseColon	"In the presence of antibiotic stress, E. coli overexpresses the global activator protein MarA, which besides inducing MDR efflux pump AcrAB, also down- regulates synthesis of the porin OmpF."
ODIWGS28	ARO:3000796	266	mdtF	AAC76539.1	U00096.1	resistance-nodulation-cell division (RND) antibiotic efflux pump	fluoroquinolone antibiotic;macrolide antibiotic;penam	antibiotic efflux	OD5	Lumen	TransverseColon	"MdtF is the multidrug inner membrane transporter for the MdtEF-TolC efflux complex."
ODIWGS28	ARO:3000830	562	cpxA	BAB38260.1	BA000007.3	resistance-nodulation-cell division (RND) antibiotic efflux pump	aminocoumarin antibiotic;aminoglycoside antibiotic	antibiotic efflux	OD5	Lumen	TransverseColon	"CpxA is a membrane-localized sensor kinase that is activated by envelope stress. It starts a kinase cascade that activates CpxR, which promotes efflux complex expression."
ODIWGS28	ARO:3003577	646	ugd	AAC75089.1	U00096.1	pmr phosphoethanolamine transferase	peptide antibiotic	antibiotic target alteration	OD5	Lumen	TransverseColon	"PmrE is required for the synthesis and transfer of 4-amino-4-deoxy-L-arabinose (Ara4N) to Lipid A, which allows gram-negative bacteria to resist the antimicrobial activity of cationic antimicrobial peptides and antibiotics such as polymyxin."
ODIWGS28	ARO:3000822	325	pmrA	AAK99679.1	AE007317.1	major facilitator superfamily (MFS) antibiotic efflux pump	fluoroquinolone antibiotic	antibiotic efflux	OD5	Lumen	TransverseColon	"PmrA is a MFS-type efflux pump expressed in Streptococcus pneumoniae that confers low-level resistance to norfloxacin, ciprofloxacin, and acriflavine."
ODIWGS28	ARO:3000194	35	tet(W)	CAA10975.1	AJ222769.3	tetracycline-resistant ribosomal protection protein	tetracycline antibiotic	antibiotic target protection	OD5	Lumen	TransverseColon	"Tet(W) is a ribosomal protection protein. It is associated with both conjugative and non conjugative DNA and has been found strains of Clostridioides difficile."
ODIWGS28	ARO:3003982	2145	LlmA_23S_CLI	APB03216.1	KX531046.1	Llm 23S ribosomal RNA methyltransferase	lincosamide antibiotic	antibiotic target alteration	OD5	Lumen	TransverseColon	"Lincosamide (Clindamycin) resistant (putative) ribosomal methyltransferase related to the RlmK 23S rRNA methyltransferase COG family. Detected in Paenibacillus sp. LC231, an isolated strain of Paenibacillus found in Lechuguilla Cave, NM, USA. Described by Pawlowski et al. 2016."
ODIWGS28	ARO:3002871	34	tet(37)	AAN28721.1	AF540889.1	tetracycline inactivation enzyme	tetracycline antibiotic	antibiotic inactivation	OD5	Lumen	TransverseColon	"tet(37) is a chromosome-encoded oxidoreductase isolated from an uncultured bacterium that confers resistance to tetracycline."
ODIWGS28	ARO:3000491	261	acrD	BAA16344.1	AP009048.1	resistance-nodulation-cell division (RND) antibiotic efflux pump	aminoglycoside antibiotic	antibiotic efflux	OD5	Lumen	TransverseColon	"AcrD is an aminoglycoside efflux pump expressed in E. coli. Its expression can be induced by indole, and is regulated by baeRS and cpxAR."
ODIWGS28	ARO:3003841	1728	kdpE	AAC73788.1	U00096.3	kdpDE	aminoglycoside antibiotic	antibiotic efflux	OD5	Lumen	TransverseColon	"kdpE is a transcriptional activator that is part of the two-component system KdpD/KdpE that is studied for its regulatory role in potassium transport and has been identified as an adaptive regulator involved in the virulence and intracellular survival of pathogenic bacteria. kdpE regulates a range of virulence loci through direct promoter binding."
ODIWGS28	ARO:3003576	149	eptA	BAE78116.1	AP009048.1	pmr phosphoethanolamine transferase	peptide antibiotic	antibiotic target alteration	OD5	Lumen	TransverseColon	"PmrC mediates the modification of Lipid A by the addition of 4-amino-4-deoxy-L-arabinose (L-Ara4N) and phosphoethanolamine, resulting in a less negative cell membrane and decreased binding of polymyxin B."
ODIWGS28	ARO:3000412	349	sul2	AAL59753.1	AY055428.1	sulfonamide resistant sul	sulfonamide antibiotic;sulfone antibiotic	antibiotic target replacement	OD5	Lumen	TransverseColon	"Sul2 is a sulfonamide resistant dihydropteroate synthase of Gram-negative bacteria, usually found on small plasmids."
ODIWGS28	ARO:3002867	681	dfrF	AAD01868.1	AF028812.1	trimethoprim resistant dihydrofolate reductase dfr	diaminopyrimidine antibiotic	antibiotic target replacement	OD5	Lumen	TransverseColon	"dfrF is a chromosome-encoded dihydrofolate reductase found in Streptococcus pyogenes."
ODIWGS28	ARO:3000828	443	baeR	BAA15935.1	AP009048.1	resistance-nodulation-cell division (RND) antibiotic efflux pump	aminocoumarin antibiotic;aminoglycoside antibiotic	antibiotic efflux	OD5	Lumen	TransverseColon	"BaeR is a response regulator that promotes the expression of MdtABC and AcrD efflux complexes."
ODIWGS28	ARO:3000502	115	AcrF	AAC76298.1	U00096.1	resistance-nodulation-cell division (RND) antibiotic efflux pump	cephalosporin;cephamycin;fluoroquinolone antibiotic;penam	antibiotic efflux	OD5	Lumen	TransverseColon	"AcrF is a inner membrane transporter, similar to AcrB."
ODIWGS28	ARO:3000518	133	CRP	BAE77933.1	AP009048.1	resistance-nodulation-cell division (RND) antibiotic efflux pump	fluoroquinolone antibiotic;macrolide antibiotic;penam	antibiotic efflux	OD5	Lumen	TransverseColon	"CRP is a global regulator that represses MdtEF multidrug efflux pump expression."
ODIWGS28	ARO:3000254	239	emrY	BAA11237.1	D78168.1	major facilitator superfamily (MFS) antibiotic efflux pump	tetracycline antibiotic	antibiotic efflux	OD5	Lumen	TransverseColon	"emrY is a multidrug transport that moves substrates across the inner membrane of the Gram-negative E. coli. It is a homolog of emrB."
ODIWGS28	ARO:3000656	133	AcrS	AAC76296.1	U00096.1	resistance-nodulation-cell division (RND) antibiotic efflux pump	cephalosporin;cephamycin;disinfecting agents and antiseptics;fluoroquinolone antibiotic;glycylcycline;penam;phenicol antibiotic;rifamycin antibiotic;tetracycline antibiotic	antibiotic efflux	OD5	Lumen	TransverseColon	"AcrS is a repressor of the AcrAB efflux complex and is associated with the expression of AcrEF. AcrS is believed to regulate a switch between AcrAB and AcrEF efflux."
ODIWGS28	ARO:3002660	396	APH(6)-Id	AAC23556.1	AF024602.1	APH(6)	aminoglycoside antibiotic	antibiotic inactivation	OD5	Lumen	TransverseColon	"APH(6)-Id is an aminoglycoside phosphotransferase encoded by plasmids, integrative conjugative elements and chromosomal genomic islands in K. pneumoniae, Salmonella spp., E. coli, Shigella flexneri, Providencia alcalifaciens, Pseudomonas spp., V. cholerae, Edwardsiella tarda, Pasteurella multocida and Aeromonas bestiarum."
ODIWGS28	ARO:3003324	22	Bsub_mprF	CAX52582.1	AL009126.3	defensin resistant mprF	peptide antibiotic	antibiotic target alteration	OD5	Lumen	TransverseColon	"MprF is a integral membrane protein that modifies the negatively-charged phosphatidylglycerol on the membrane surface. This confers resistance to cationic peptides that disrupt the cell membrane, including defensins. Additionally, large-scale mutations causing loss of function of the gene result in increased susceptibility to daptomycin."
ODIWGS28	ARO:3000832	585	evgA	BAB36671.1	BA000007.3	major facilitator superfamily (MFS) antibiotic efflux pump;resistance-nodulation-cell division (RND) antibiotic efflux pump	fluoroquinolone antibiotic;macrolide antibiotic;penam;tetracycline antibiotic	antibiotic efflux	OD5	Lumen	TransverseColon	"EvgA, when phosphorylated, is a positive regulator for efflux protein complexes emrKY and mdtEF. While usually phosphorylated in a EvgS dependent manner, it can be phosphorylated in the absence of EvgS when overexpressed."
ODIWGS28	ARO:3004043	76	Ecol_acrA	AAC73565.1	U00096.3	resistance-nodulation-cell division (RND) antibiotic efflux pump	cephalosporin;disinfecting agents and antiseptics;fluoroquinolone antibiotic;glycylcycline;penam;phenicol antibiotic;rifamycin antibiotic;tetracycline antibiotic	antibiotic efflux	OD5	Lumen	TransverseColon	"AcrA is a subunit of the AcrAB-TolC multidrug efflux system that in E. coli."
ODIWGS28	ARO:3003548	198	mdtN	BAE78084.1	AP009048.1	major facilitator superfamily (MFS) antibiotic efflux pump	disinfecting agents and antiseptics;nucleoside antibiotic	antibiotic efflux	OD5	Lumen	TransverseColon	"Multidrug resistance efflux pump. Could be involved in resistance to puromycin, acriflavine and tetraphenylarsonium chloride."
ODIWGS28	ARO:3003843	32	leuO	VWQ00850.1	LR730402.1	major facilitator superfamily (MFS) antibiotic efflux pump	disinfecting agents and antiseptics;nucleoside antibiotic	antibiotic efflux	OD5	Lumen	TransverseColon	"leuO, a LysR family transcription factor, exists in a wide variety of bacteria of the family Enterobacteriaceae and is involved in the regulation of as yet unidentified genes affecting the stress response and pathogenesis expression. LeuO is also an activator of the MdtNOP efflux pump."
ODIWGS28	ARO:3004253	156	vanU_in_vanG_cl	ABA71726.1	DQ212986.1	glycopeptide resistance gene cluster;vanU	glycopeptide antibiotic	antibiotic target alteration	OD5	Lumen	TransverseColon	"Also known as vanUG, is a vanG variant found in the vanG gene cluster."
ODIWGS28	ARO:3000833	914	evgS	AAC75429.1	U00096.1	major facilitator superfamily (MFS) antibiotic efflux pump;resistance-nodulation-cell division (RND) antibiotic efflux pump	fluoroquinolone antibiotic;macrolide antibiotic;penam;tetracycline antibiotic	antibiotic efflux	OD5	Lumen	TransverseColon	"EvgS is a sensor protein that phosphorylates the regulatory protein EvgA. evgS corresponds to 1 locus in Pseudomonas aeruginosa PAO1 and 1 locus in Pseudomonas aeruginosa LESB58."
ODIWGS28	ARO:3003578	235	PmrF	AAC75314.1	U00096.1	pmr phosphoethanolamine transferase	peptide antibiotic	antibiotic target alteration	OD5	Lumen	TransverseColon	"PmrF is required for the synthesis and transfer of 4-amino-4-deoxy-L-arabinose (Ara4N) to Lipid A, which allows gram-negative bacteria to resist the antimicrobial activity of cationic antimicrobial peptides and antibiotics such as polymyxin. pmrF corresponds to 1 locus in Pseudomonas aeruginosa PAO1 and 1 locus in Pseudomonas aeruginosa LESB58."
ODIWGS28	ARO:3005063	919	cprR	AAG06465.1	AE004091.2	pmr phosphoethanolamine transferase	peptide antibiotic	antibiotic efflux;antibiotic target alteration	OD5	Lumen	TransverseColon	"cprR is one part of a two-component regulatory system. It with its counterpart cprS induce the Arn operon to confer resistance to peptide antibiotics."
ODIWGS28	ARO:3002639	276	APH(3'')-Ib	ABK33456.1	AF313472.2	APH(3'')	aminoglycoside antibiotic	antibiotic inactivation	OD5	Lumen	TransverseColon	"APH(3'')-Ib is an aminoglycoside phosphotransferase encoded by plasmids, transposons, integrative conjugative elements and chromosomes in Enterobacteriaceae and Pseudomonas spp."
ODIWGS28	ARO:3003952	420	YojI	AAC75271.1	U00096.3	ATP-binding cassette (ABC) antibiotic efflux pump	peptide antibiotic	antibiotic efflux	OD5	Lumen	TransverseColon	"YojI mediates resistance to the peptide antibiotic microcin J25 when it is expressed from a multicopy vector. YojI is capable of pumping out microcin molecules. The outer membrane protein TolC in addition to YojI is required for export of microcin J25 out of the cell. Microcin J25 is thus the first known substrate for YojI."
ODIWGS28	ARO:3000508	302	gadX	BAE77778.1	AP009048.1	resistance-nodulation-cell division (RND) antibiotic efflux pump	fluoroquinolone antibiotic;macrolide antibiotic;penam	antibiotic efflux	OD5	Lumen	TransverseColon	"GadX is an AraC-family regulator that promotes mdtEF expression to confer multidrug resistance."
ODIWGS28	ARO:3000216	109	acrB	AAC73564.1	U00096.3	resistance-nodulation-cell division (RND) antibiotic efflux pump	cephalosporin;disinfecting agents and antiseptics;fluoroquinolone antibiotic;glycylcycline;penam;phenicol antibiotic;rifamycin antibiotic;tetracycline antibiotic	antibiotic efflux	OD5	Lumen	TransverseColon	"Protein subunit of AcrA-AcrB-TolC multidrug efflux complex. AcrB functions as a herterotrimer which forms the inner membrane component and is primarily responsible for substrate recognition and energy transduction by acting as a drug/proton antiporter."
ODIWGS28	ARO:3000190	206	tet(O)	AAA23033.2	M18896.2	tetracycline-resistant ribosomal protection protein	tetracycline antibiotic	antibiotic target protection	OD5	Lumen	TransverseColon	"Tet(O) is a ribosomal protection protein. It is associated with conjugative plasmids."
ODIWGS28	ARO:3005053	284	ArnT	CDO12042.1	FO834906.1	pmr phosphoethanolamine transferase	peptide antibiotic	antibiotic target alteration	OD5	Lumen	TransverseColon	"ArnT is involved in Cell Wall Biosynthesis, specifically 4-amino-4-deoxy-L-arabinose (Ara4N). It confers resistance to peptide antibiotics."
ODIWGS28	ARO:3003838	259	gadW	ANK04027.1	CP015085.1	resistance-nodulation-cell division (RND) antibiotic efflux pump	fluoroquinolone antibiotic;macrolide antibiotic;penam	antibiotic efflux	OD5	Lumen	TransverseColon	"GadW is an AraC-family regulator that promotes mdtEF expression to confer multidrug resistance. GadW inhibits GadX-dependent activation. GadW clearly represses gadX and, in situations where GadX is missing, activates gadA and gadBC."
ODIWGS28	ARO:3003105	303	dfrA3	AAA25550.1	J03306.1	trimethoprim resistant dihydrofolate reductase dfr	diaminopyrimidine antibiotic	antibiotic target replacement	OD5	Lumen	TransverseColon	"dfrA3 is an integron-encoded dihydrofolate reductase found in Escherichia coli."
ODIWGS28	ARO:3000027	104	emrA	BAA16547.1	AP009048.1	major facilitator superfamily (MFS) antibiotic efflux pump	fluoroquinolone antibiotic	antibiotic efflux	OD5	Lumen	TransverseColon	"EmrA is a membrane fusion protein, providing an efflux pathway with EmrB and TolC between the inner and outer membranes of E. coli, a Gram-negative bacterium."
ODIWGS28	ARO:3005040	15	YajC	TKW44661.1	VAOQ01003483.1	resistance-nodulation-cell division (RND) antibiotic efflux pump	cephalosporin;disinfecting agents and antiseptics;fluoroquinolone antibiotic;glycopeptide antibiotic;glycylcycline;oxazolidinone antibiotic;penam;phenicol antibiotic;rifamycin antibiotic;tetracycline antibiotic	antibiotic efflux	OD5	Lumen	TransverseColon	"YajC interacts with the AcrAB-TolC efflux pump in a way that in uncharacterized but is shown to grant increased fitness in the presence of linezolid, rifampicin, and vancomycin."
ODIWGS28	ARO:3000375	18	ErmB	AAF86219.1	AF242872.1	Erm 23S ribosomal RNA methyltransferase	lincosamide antibiotic;macrolide antibiotic;streptogramin A antibiotic;streptogramin B antibiotic;streptogramin antibiotic	antibiotic target alteration	OD5	Lumen	TransverseColon	"ErmB confers the MLSb phenotype. Similar to ErmC, expression of ErmB is inducible by erythromycin. The leader peptide causes attenuation of the mRNA and stabilizes the structure preventing further translation. When erythromycin is present, it binds the leader peptide causing a change in conformation allowing for the expression of ErmB."
ODIWGS28	ARO:3001216	48	mdtH	AAC74149.2	U00096.1	major facilitator superfamily (MFS) antibiotic efflux pump	fluoroquinolone antibiotic	antibiotic efflux	OD5	Lumen	TransverseColon	"Multidrug resistance protein MdtH."
ODIWGS29	ARO:3000186	650	tet(M)	BAB82500.1	AB039845.1	tetracycline-resistant ribosomal protection protein	tetracycline antibiotic	antibiotic target protection	OD9	Mucosa	TransverseColon	"Tet(M) is a ribosomal protection protein that confers tetracycline resistance. It is found on transposable DNA elements and its horizontal transfer between bacterial species has been documented."
ODIWGS29	ARO:3002931	1171	vanS_in_vanA_cl	AAA65954.1	M97297.1	glycopeptide resistance gene cluster;vanS	glycopeptide antibiotic	antibiotic target alteration	OD9	Mucosa	TransverseColon	"Also known as vanSA, is a vanS variant found in the vanA gene cluster."
ODIWGS29	ARO:3002949	11	vanX_in_vanA_cl	AAA65957.1	M97297.1	glycopeptide resistance gene cluster;vanX	glycopeptide antibiotic	antibiotic target alteration	OD9	Mucosa	TransverseColon	"Also known as vanXA, is a vanX variant found in the vanA gene cluster."
ODIWGS29	ARO:3005098	15	qacL	AAZ42322.1	DQ149925.1	small multidrug resistance (SMR) antibiotic efflux pump	disinfecting agents and antiseptics	antibiotic efflux	OD9	Mucosa	TransverseColon	"A subunit of the qac multidrug efflux pump in Vibrio cholerae."
ODIWGS29	ARO:3007120	88	tet(O/M/O)	AAR29485.1	AY394560.1	tetracycline-resistant ribosomal protection protein	tetracycline antibiotic	antibiotic target protection	OD9	Mucosa	TransverseColon	"Tet(O/M/O) is a mosaic tetracycline resistance gene and ribosomal protection protein."
ODIWGS29	ARO:3000815	136	mgrA	BAB41874.1	BA000018.3	ATP-binding cassette (ABC) antibiotic efflux pump;major facilitator superfamily (MFS) antibiotic efflux pump	cephalosporin;disinfecting agents and antiseptics;fluoroquinolone antibiotic;penam;peptide antibiotic;tetracycline antibiotic	antibiotic efflux	OD9	Mucosa	TransverseColon	"MgrA, also known as NorR, is a regulator for norA, norB, and tet38. It is a positive regulator for norA expression, but is a direct repressor for norB and an indirect repressor of tet38."
ODIWGS29	ARO:3004442	127	tet(W/N/W)	AMP42147.1	KU736867.1	tetracycline-resistant ribosomal protection protein	tetracycline antibiotic	antibiotic target protection	OD9	Mucosa	TransverseColon	"tet(W/N/W) is a mosaic tetracycline resistance gene and ribosomal protection protein."
ODIWGS29	ARO:3003954	226	efmA	BAG75524.1	AB467372.1	major facilitator superfamily (MFS) antibiotic efflux pump	fluoroquinolone antibiotic;macrolide antibiotic	antibiotic efflux	OD9	Mucosa	TransverseColon	"efmA is an MFS transporter permease in E. faecium."
ODIWGS29	ARO:3000838	2757	arlR	ATC67679.1	CP023390.1	major facilitator superfamily (MFS) antibiotic efflux pump	disinfecting agents and antiseptics;fluoroquinolone antibiotic	antibiotic efflux	OD9	Mucosa	TransverseColon	"ArlR is a response regulator that binds to the norA promoter to activate expression. ArlR must first be phosphorylated by ArlS."
ODIWGS29	ARO:3000194	510	tet(W)	CAA10975.1	AJ222769.3	tetracycline-resistant ribosomal protection protein	tetracycline antibiotic	antibiotic target protection	OD9	Mucosa	TransverseColon	"Tet(W) is a ribosomal protection protein. It is associated with both conjugative and non conjugative DNA and has been found strains of Clostridioides difficile."
ODIWGS29	ARO:3000565	615	tet(38)	AAV80464.1	AY825285.1	major facilitator superfamily (MFS) antibiotic efflux pump	tetracycline antibiotic	antibiotic efflux	OD9	Mucosa	TransverseColon	"Tet38 is a tetracycline efflux pump found in the Gram-positive Staphylococcus aureus. It is regulated by mgrA, which also regulates NorB."
ODIWGS29	ARO:3002871	51	tet(37)	AAN28721.1	AF540889.1	tetracycline inactivation enzyme	tetracycline antibiotic	antibiotic inactivation	OD9	Mucosa	TransverseColon	"tet(37) is a chromosome-encoded oxidoreductase isolated from an uncultured bacterium that confers resistance to tetracycline."
ODIWGS29	ARO:3007047	89	mefH	QQM99829.1	MW269960.1	major facilitator superfamily (MFS) antibiotic efflux pump	macrolide antibiotic	antibiotic efflux	OD9	Mucosa	TransverseColon	"mefH is an mef efflux pump protein."
ODIWGS29	ARO:3002837	31	lnuC	AAY32951.1	AY928180.1	lincosamide nucleotidyltransferase (LNU)	lincosamide antibiotic	antibiotic inactivation	OD9	Mucosa	TransverseColon	"lnuC is a transposon-mediated nucleotidyltransferase found in Streptococcus agalactiae."
ODIWGS29	ARO:3004038	11	Paer_emrE	AAG08375.1	AE004091.2	small multidrug resistance (SMR) antibiotic efflux pump	aminoglycoside antibiotic	antibiotic efflux	OD9	Mucosa	TransverseColon	"EmrE is a small multidrug transporter that functions as a homodimer and that couples the efflux of small polyaromatic cations from the cell with the import of protons down an electrochemical gradient. Confers resistance to tetraphenylphosphonium, methyl viologen, gentamicin, kanamycin, and neomycin."
ODIWGS29	ARO:3002867	128	dfrF	AAD01868.1	AF028812.1	trimethoprim resistant dihydrofolate reductase dfr	diaminopyrimidine antibiotic	antibiotic target replacement	OD9	Mucosa	TransverseColon	"dfrF is a chromosome-encoded dihydrofolate reductase found in Streptococcus pyogenes."
ODIWGS29	ARO:3007121	148	tet(O/W)	AAR29969.1	AY485122.1	tetracycline-resistant ribosomal protection protein	tetracycline antibiotic	antibiotic target protection	OD9	Mucosa	TransverseColon	"Tet(O/W) is a mosaic tetracycline resistance gene and ribosomal protection protein."
ODIWGS29	ARO:3002882	8861	lmrD	AYV52072.1	CP033607.1	ATP-binding cassette (ABC) antibiotic efflux pump	lincosamide antibiotic	antibiotic efflux	OD9	Mucosa	TransverseColon	"lmrD is a chromosomally-encoded efflux pump that confers resistance to lincosamides in Streptomyces lincolnensis and Lactococcus lactis. It can dimerize with lmrC."
ODIWGS29	ARO:3000196	1287	tet(32)	ACH87088.1	EU722333.1	tetracycline-resistant ribosomal protection protein	tetracycline antibiotic	antibiotic target protection	OD9	Mucosa	TransverseColon	"Tet(32) is a tetracycline resistance gene similar to Tet(O), and binds to the ribosome to confer tetracycline resistance as a ribosomal protection protein."
ODIWGS29	ARO:3004572	1495	Saur_LmrS	AAW38464.1	CP000046.1	major facilitator superfamily (MFS) antibiotic efflux pump	aminoglycoside antibiotic;diaminopyrimidine antibiotic;macrolide antibiotic;oxazolidinone antibiotic;phenicol antibiotic	antibiotic efflux	OD9	Mucosa	TransverseColon	"MFS transporters are secondary active transporters with single-polypeptide chains containing 400-600 amino acids that transport small solutes across the membrane by using electrochemical gradients. LmrS has 14 transmembrane helices and, when expressed in E. coli, is capable of extruding a variety of antibiotics inclinding linezolid, trimethoprim, florfenicol, chlorampheniocol, erythromycin, stre…
ODIWGS29	ARO:3004253	161	vanU_in_vanG_cl	ABA71726.1	DQ212986.1	glycopeptide resistance gene cluster;vanU	glycopeptide antibiotic	antibiotic target alteration	OD9	Mucosa	TransverseColon	"Also known as vanUG, is a vanG variant found in the vanG gene cluster."
ODIWGS29	ARO:3002955	64	vanY_in_vanA_cl	AAA65958.1	M97297.1	glycopeptide resistance gene cluster;vanY	glycopeptide antibiotic	antibiotic target alteration	OD9	Mucosa	TransverseColon	"Also known as vanYA, is a vanY variant found in the vanA gene cluster."
ODIWGS29	ARO:3002897	357	SAT-4	AAB53445.1	U01945.1	streptothricin acetyltransferase (SAT)	nucleoside antibiotic	antibiotic inactivation	OD9	Mucosa	TransverseColon	"SAT-4 is a plasmid-mediated streptothricin acetyltransferase and streptothricin (a nucleoside antibiotic) resistant determinant. Originally described from a Campylobacter coli BE/G4 plasmid gene sequence by Jacob et al, 1994."
ODIWGS29	ARO:3007122	191	tet(O/W/32/O)	ABF69686.1	DQ525023.1	tetracycline-resistant ribosomal protection protein	tetracycline antibiotic	antibiotic target protection	OD9	Mucosa	TransverseColon	"Tet(O/W/32/O) is a mosaic tetracycline resistance gene and ribosomal protection protein."
ODIWGS29	ARO:3002962	55	vanZ_in_vanA_cl	AAA65959.1	M97297.1	glycopeptide resistance gene cluster;vanZ	glycopeptide antibiotic	antibiotic target alteration	OD9	Mucosa	TransverseColon	"Also known as vanZA, is a vanZ variant found in the vanA gene cluster."
ODIWGS29	ARO:3004047	2418	kdpD	CYF42523.1	FHDU01000010.1	kdpDE	aminoglycoside antibiotic	antibiotic efflux	OD9	Mucosa	TransverseColon	"kdpD is a component of the two-component regulatory system, kdpDE. This system is involved in potassium transport and homeostasis, and has been implicated in virulence factor regulation along with kdpE."
ODIWGS29	ARO:3000010	217	vanA	AAA65956.1	M97297.1	Van ligase;glycopeptide resistance gene cluster	glycopeptide antibiotic	antibiotic target alteration	OD9	Mucosa	TransverseColon	"VanA is a D-Ala-D-Ala ligase homolog that synthesizes D-Ala-D-Lac, an alternative substrate for peptidoglycan synthesis that reduces vancomycin binding affinity. It has been isolated from VREs. It is associated with both vancomycin and teicoplanin resistance."
ODIWGS29	ARO:3000617	247	mecA	AGC51118.1	KC243783.1	methicillin resistant PBP2	carbapenem;cephalosporin;cephamycin;monobactam;penam	antibiotic target replacement	OD9	Mucosa	TransverseColon	"A foreign PBP2a acquired by lateral gene transfer that able to perform peptidoglycan synthesis in the presence of beta-lactams."
ODIWGS29	ARO:3000746	199	mepR	BAB56495.1	BA000017.4	multidrug and toxic compound extrusion (MATE) transporter	glycylcycline;tetracycline antibiotic	antibiotic efflux	OD9	Mucosa	TransverseColon	"MepR is an upstream repressor of MepA in Staphylococcus aureus. It is part of the mepRAB operon."
ODIWGS29	ARO:3000251	1071	msrA	CAA36304.1	X52085.1	msr-type ABC-F protein	macrolide antibiotic;streptogramin B antibiotic;streptogramin antibiotic	antibiotic target protection	OD9	Mucosa	TransverseColon	"MsrA is an ABC-F subfamily ribosomal protection protein expressed in Staphylococcus species which confers resistance to erythromycin and streptogramin B antibiotics through antibiotic target protection mechanisms. It is associated with plasmid DNA."
ODIWGS29	ARO:3004039	10	Ecol_emrE	CAA77936.1	Z11877.1	small multidrug resistance (SMR) antibiotic efflux pump	macrolide antibiotic	antibiotic efflux	OD9	Mucosa	TransverseColon	"Member of the small MDR (multidrug resistance) family of transporters; in Escherichia coli this protein provides resistance against a number of positively charged compounds including ethidium bromide and erythromycin; proton-dependent secondary transporter which exchanges protons for compound translocation."
ODIWGS29	ARO:3000215	254	mecR1	ABQ47844.1	CP000703.1	methicillin resistant PBP2	carbapenem;cephalosporin;cephamycin;monobactam;penam	antibiotic target replacement	OD9	Mucosa	TransverseColon	"mecR1 is a transmembrane spanning and signal transducing protein which in response to interaction with beta-lactam antibiotics results in upregulation of the mecA/mecR1/mecI operon."
ODIWGS29	ARO:3000839	1211	arlS	ABD30512.1	CP000253.1	major facilitator superfamily (MFS) antibiotic efflux pump	disinfecting agents and antiseptics;fluoroquinolone antibiotic	antibiotic efflux	OD9	Mucosa	TransverseColon	"ArlS is a protein histidine kinase that phosphorylates ArlR, a promoter for norA expression."
ODIWGS29	ARO:3002628	94	aad(6)	AAU10334.1	AY712687.1	ANT(6)	aminoglycoside antibiotic	antibiotic inactivation	OD9	Mucosa	TransverseColon	"ANT(6)-Ia/aad(6) is a plasmid-encoded aminoglycoside nucleotidyltransferase gene in E. faecalis and Streptococcus oralis."
ODIWGS29	ARO:3000190	889	tet(O)	AAA23033.2	M18896.2	tetracycline-resistant ribosomal protection protein	tetracycline antibiotic	antibiotic target protection	OD9	Mucosa	TransverseColon	"Tet(O) is a ribosomal protection protein. It is associated with conjugative plasmids."
ODIWGS29	ARO:3000319	242	mphC	BAA34540.1	AB013298.1	macrolide phosphotransferase (MPH)	macrolide antibiotic	antibiotic inactivation	OD9	Mucosa	TransverseColon	"The mphC gene was identified from Staphylococcus aureus. This gene shows similarity to mphB gene from Escherchia coli."
ODIWGS29	ARO:3004667	17	Saur_norA	BAA14147.1	D90119.1	major facilitator superfamily (MFS) antibiotic efflux pump	fluoroquinolone antibiotic	antibiotic efflux	OD9	Mucosa	TransverseColon	"NorA gene cloned from Staphylococcus aureus conferred relatively high resistance to hydrophilic quinolones such as norfloxacin, enoxacin, ofloxacin, and ciprofloxacin in S. aureus and Escherichia coli. Had low or no resistance at all to hydrophobic ones such as nalidixic acid, oxolinic acid, and sparfloxacin in S. aureus and Escherichia coli."
ODIWGS29	ARO:3002647	1220	APH(3')-IIIa	AGV10830.1	CP004067.1	APH(3')	aminoglycoside antibiotic	antibiotic inactivation	OD9	Mucosa	TransverseColon	"APH(3')-IIIa is a plasmid-encoded aminoglycoside phosphotransferase in S. aureus and Enterococcus spp."
ODIWGS29	ARO:3002919	2102	vanR_in_vanA_cl	AAA65953.1	M97297.1	glycopeptide resistance gene cluster;vanR	glycopeptide antibiotic	antibiotic target alteration	OD9	Mucosa	TransverseColon	"Also known as vanRA, is a vanR variant found in the vanA gene cluster."
ODIWGS29	ARO:3000026	1038	mepA	AAU95768.1	AY661734.1	multidrug and toxic compound extrusion (MATE) transporter	glycylcycline;tetracycline antibiotic	antibiotic efflux	OD9	Mucosa	TransverseColon	"MepA is an efflux protein regulated by MepR and part of the MepRAB cluster. Its presence in Staphylococcus aureus led to multidrug resistance, while it has also been shown to decrease tigecycline susceptibility."
ODIWGS29	ARO:3007010	785	norC	AGP27106.1	CP005288.1	major facilitator superfamily (MFS) antibiotic efflux pump	disinfecting agents and antiseptics;fluoroquinolone antibiotic	antibiotic efflux	OD9	Mucosa	TransverseColon	"NorC is a multidrug efflux pump in Staphylococcus aureus that confers resistance to fluoroquinolones and other structurally unrelated antibiotics like tetracycline. It shares 61% similarity with NorB, and is a structural homolog of Blt of Bacillus subtilis. Like NorA and NorB, NorC is regulated by mgrA, also known as NorR."
ODIWGS29	ARO:3007119	256	tet(O/32/O)	CAC41371.2	AJ295238.3	tetracycline-resistant ribosomal protection protein	tetracycline antibiotic	antibiotic target protection	OD9	Mucosa	TransverseColon	"Tet(O/32/O) is a mosaic tetracycline resistance gene and ribosomal protection protein."
ODIWGS29	ARO:3000375	72	ErmB	AAF86219.1	AF242872.1	Erm 23S ribosomal RNA methyltransferase	lincosamide antibiotic;macrolide antibiotic;streptogramin A antibiotic;streptogramin B antibiotic;streptogramin antibiotic	antibiotic target alteration	OD9	Mucosa	TransverseColon	"ErmB confers the MLSb phenotype. Similar to ErmC, expression of ErmB is inducible by erythromycin. The leader peptide causes attenuation of the mRNA and stabilizes the structure preventing further translation. When erythromycin is present, it binds the leader peptide causing a change in conformation allowing for the expression of ErmB."
ODIWGS29	ARO:3007013	351	sdrM	BAB43261.1	BA000018.3	major facilitator superfamily (MFS) antibiotic efflux pump	disinfecting agents and antiseptics;fluoroquinolone antibiotic	antibiotic efflux	OD9	Mucosa	TransverseColon	"sdrM encodes an efflux pump that confers resistance to norfloxacin and ethidium bromide, making this a multidrug resistance gene."
ODIWGS29	ARO:3002942	385	vanH_in_vanA_cl	AAA65955.1	M97297.1	glycopeptide resistance gene cluster;vanH	glycopeptide antibiotic	antibiotic target alteration	OD9	Mucosa	TransverseColon	"Also known as vanHA, is a vanH variant in the vanA gene cluster."
ODIWGS30	ARO:3004032	169	tetA(46)	AET10444.1	HQ652506.1	ATP-binding cassette (ABC) antibiotic efflux pump	tetracycline antibiotic	antibiotic efflux	OD3	Lumen	Ileum	"tetA(46) is a subunit of tetAB(46), a heterodimeric ABC transporter, that is required for conferring tetracycline resistance in Streptococcus australis isolated from the oral cavity."
ODIWGS31	ARO:3003905	28	ANT(4')-Ib	ADA62098.1	GQ900432.1	ANT(4')	aminoglycoside antibiotic	antibiotic inactivation	OD8	Mucosa	Jejunum	"Aminoglycoside nucleotidyltransferase sequence from Staphylococcus aureus plasmid."
ODIWGS31	ARO:3003982	18	LlmA_23S_CLI	APB03216.1	KX531046.1	Llm 23S ribosomal RNA methyltransferase	lincosamide antibiotic	antibiotic target alteration	OD8	Mucosa	Jejunum	"Lincosamide (Clindamycin) resistant (putative) ribosomal methyltransferase related to the RlmK 23S rRNA methyltransferase COG family. Detected in Paenibacillus sp. LC231, an isolated strain of Paenibacillus found in Lechuguilla Cave, NM, USA. Described by Pawlowski et al. 2016."
ODIWGS33	ARO:3002986	70	bacA	AAC76093.1	U00096.3	undecaprenyl pyrophosphate related proteins	peptide antibiotic	antibiotic target alteration	OD5	Lumen	Jejunum	"The bacA gene product (BacA) recycles undecaprenyl pyrophosphate during cell wall biosynthesis which confers resistance to bacitracin."
ODIWGS33	ARO:3003730	59	Bbif_ileS_MUP	ADP36409.1	CP001840.1	antibiotic-resistant isoleucyl-tRNA synthetase (ileS)	mupirocin-like antibiotic	antibiotic target alteration	OD5	Lumen	Jejunum	"Bifidobacteria have an intrinsically resistant form of ileS (isoleucyl-tRNA synthetase) that confers resistance to mupirocin."
ODIWGS33	ARO:3003549	108	mdtO	BAE78083.1	AP009048.1	major facilitator superfamily (MFS) antibiotic efflux pump	disinfecting agents and antiseptics;nucleoside antibiotic	antibiotic efflux	OD5	Lumen	Jejunum	"Multidrug resistance efflux pump. Could be involved in resistance to puromycin, acriflavine and tetraphenylarsonium chloride."
ODIWGS33	ARO:3000027	19	emrA	BAA16547.1	AP009048.1	major facilitator superfamily (MFS) antibiotic efflux pump	fluoroquinolone antibiotic	antibiotic efflux	OD5	Lumen	Jejunum	"EmrA is a membrane fusion protein, providing an efflux pathway with EmrB and TolC between the inner and outer membranes of E. coli, a Gram-negative bacterium."
ODIWGS33	ARO:3003839	23	Mrx	AAS13767.1	AY522923.1	macrolide phosphotransferase (MPH)	macrolide antibiotic	antibiotic inactivation	OD5	Lumen	Jejunum	"Mrx is part of the macrolide inactivation gene cluster in Aeromonas hydrophila."
ODIWGS33	ARO:3004043	20	Ecol_acrA	AAC73565.1	U00096.3	resistance-nodulation-cell division (RND) antibiotic efflux pump	cephalosporin;disinfecting agents and antiseptics;fluoroquinolone antibiotic;glycylcycline;penam;phenicol antibiotic;rifamycin antibiotic;tetracycline antibiotic	antibiotic efflux	OD5	Lumen	Jejunum	"AcrA is a subunit of the AcrAB-TolC multidrug efflux system that in E. coli."
ODIWGS33	ARO:3003576	40	eptA	BAE78116.1	AP009048.1	pmr phosphoethanolamine transferase	peptide antibiotic	antibiotic target alteration	OD5	Lumen	Jejunum	"PmrC mediates the modification of Lipid A by the addition of 4-amino-4-deoxy-L-arabinose (L-Ara4N) and phosphoethanolamine, resulting in a less negative cell membrane and decreased binding of polymyxin B."
ODIWGS33	ARO:3003952	34	YojI	AAC75271.1	U00096.3	ATP-binding cassette (ABC) antibiotic efflux pump	peptide antibiotic	antibiotic efflux	OD5	Lumen	Jejunum	"YojI mediates resistance to the peptide antibiotic microcin J25 when it is expressed from a multicopy vector. YojI is capable of pumping out microcin molecules. The outer membrane protein TolC in addition to YojI is required for export of microcin J25 out of the cell. Microcin J25 is thus the first known substrate for YojI."
ODIWGS33	ARO:3000796	77	mdtF	AAC76539.1	U00096.1	resistance-nodulation-cell division (RND) antibiotic efflux pump	fluoroquinolone antibiotic;macrolide antibiotic;penam	antibiotic efflux	OD5	Lumen	Jejunum	"MdtF is the multidrug inner membrane transporter for the MdtEF-TolC efflux complex."
ODIWGS33	ARO:3003064	16	ykkD	CAB13167.1	AL009126.1	small multidrug resistance (SMR) antibiotic efflux pump	aminoglycoside antibiotic;phenicol antibiotic;tetracycline antibiotic	antibiotic efflux	OD5	Lumen	Jejunum	"ykkD is an SMR-type protein that is a subunit of the ykkCD efflux pump."
ODIWGS33	ARO:3000508	116	gadX	BAE77778.1	AP009048.1	resistance-nodulation-cell division (RND) antibiotic efflux pump	fluoroquinolone antibiotic;macrolide antibiotic;penam	antibiotic efflux	OD5	Lumen	Jejunum	"GadX is an AraC-family regulator that promotes mdtEF expression to confer multidrug resistance."
ODIWGS33	ARO:3000216	78	acrB	AAC73564.1	U00096.3	resistance-nodulation-cell division (RND) antibiotic efflux pump	cephalosporin;disinfecting agents and antiseptics;fluoroquinolone antibiotic;glycylcycline;penam;phenicol antibiotic;rifamycin antibiotic;tetracycline antibiotic	antibiotic efflux	OD5	Lumen	Jejunum	"Protein subunit of AcrA-AcrB-TolC multidrug efflux complex. AcrB functions as a herterotrimer which forms the inner membrane component and is primarily responsible for substrate recognition and energy transduction by acting as a drug/proton antiporter."
ODIWGS33	ARO:3000191	24	tet(Q)	CAA79727.1	Z21523.1	tetracycline-resistant ribosomal protection protein	tetracycline antibiotic	antibiotic target protection	OD5	Lumen	Jejunum	"Tet(Q) is a ribosomal protection protein. Its gene is associated with a conjugative transposon and has been found in both Gram-positive and Gram-negative bacteria."
ODIWGS33	ARO:3002871	19	tet(37)	AAN28721.1	AF540889.1	tetracycline inactivation enzyme	tetracycline antibiotic	antibiotic inactivation	OD5	Lumen	Jejunum	"tet(37) is a chromosome-encoded oxidoreductase isolated from an uncultured bacterium that confers resistance to tetracycline."
ODIWGS33	ARO:3000491	77	acrD	BAA16344.1	AP009048.1	resistance-nodulation-cell division (RND) antibiotic efflux pump	aminoglycoside antibiotic	antibiotic efflux	OD5	Lumen	Jejunum	"AcrD is an aminoglycoside efflux pump expressed in E. coli. Its expression can be induced by indole, and is regulated by baeRS and cpxAR."
ODIWGS33	ARO:3004583	10	Kpne_KpnF	BAH63252.1	AP006725.1	small multidrug resistance (SMR) antibiotic efflux pump	aminoglycoside antibiotic;cephalosporin;disinfecting agents and antiseptics;macrolide antibiotic;peptide antibiotic;rifamycin antibiotic;tetracycline antibiotic	antibiotic efflux	OD5	Lumen	Jejunum	"KpnF subunit of KpnEF resembles EbrAB from E. coli. Mutation in KpnEF resulted in increased susceptibility to cefepime, ceftriaxon, colistin, erythromycin, rifampin, tetracycline, and streptomycin as well as enhanced sensitivity toward sodium dodecyl sulfate, deoxycholate, dyes, benzalkonium chloride, chlorhexidine, and triclosan."
ODIWGS33	ARO:3004659	36	Mef(En2)	AAF74725.1	AF251288.1	major facilitator superfamily (MFS) antibiotic efflux pump	macrolide antibiotic	antibiotic efflux	OD5	Lumen	Jejunum	"NBU2-encoded resistance gene. An MefE homolog in Bacteroides species. Macrolide efflux MFS transporter."
ODIWGS33	ARO:3003950	46	msbA	AAC74000.1	U00096.3	ATP-binding cassette (ABC) antibiotic efflux pump	nitroimidazole antibiotic	antibiotic efflux	OD5	Lumen	Jejunum	"MsbA is a multidrug resistance transporter homolog from E. coli and belongs to a superfamily of transporters that contain an adenosine triphosphate (ATP) binding cassette (ABC) which is also called a nucleotide-binding domain (NBD). MsbA is a member of the MDR-ABC transporter group by sequence homology. MsbA transports lipid A, a major component of the bacterial outer cell membrane, and is the o…
ODIWGS33	ARO:3003550	37	mdtP	BAE78082.1	AP009048.1	major facilitator superfamily (MFS) antibiotic efflux pump	disinfecting agents and antiseptics;nucleoside antibiotic	antibiotic efflux	OD5	Lumen	Jejunum	"Multidrug resistance efflux pump. Could be involved in resistance to puromycin, acriflavine and tetraphenylarsonium chloride."
ODIWGS33	ARO:3000502	66	AcrF	AAC76298.1	U00096.1	resistance-nodulation-cell division (RND) antibiotic efflux pump	cephalosporin;cephamycin;fluoroquinolone antibiotic;penam	antibiotic efflux	OD5	Lumen	Jejunum	"AcrF is a inner membrane transporter, similar to AcrB."
ODIWGS33	ARO:3000516	25	emrR	AAC75731.1	U00096.3	major facilitator superfamily (MFS) antibiotic efflux pump	fluoroquinolone antibiotic	antibiotic efflux	OD5	Lumen	Jejunum	"EmrR is a negative regulator for the EmrAB-TolC multidrug efflux pump in E. coli. Mutations lead to EmrAB-TolC overexpression."
ODIWGS34	ARO:3000186	340	tet(M)	BAB82500.1	AB039845.1	tetracycline-resistant ribosomal protection protein	tetracycline antibiotic	antibiotic target protection	OD7	Lumen	DescendingColon	"Tet(M) is a ribosomal protection protein that confers tetracycline resistance. It is found on transposable DNA elements and its horizontal transfer between bacterial species has been documented."
ODIWGS34	ARO:3000616	313	mel	AAL73129.1	AF227521.1	msr-type ABC-F protein	macrolide antibiotic;streptogramin antibiotic	antibiotic target protection	OD7	Lumen	DescendingColon	"Mel, a homolog of MsrA, is an ABC-F subfamily protein associated with macrolide resistance. It is expressed on the same operon as mefA and mefE, both MFS-type efflux proteins that confer macrolide resistance."
ODIWGS34	ARO:3007120	11	tet(O/M/O)	AAR29485.1	AY394560.1	tetracycline-resistant ribosomal protection protein	tetracycline antibiotic	antibiotic target protection	OD7	Lumen	DescendingColon	"Tet(O/M/O) is a mosaic tetracycline resistance gene and ribosomal protection protein."
ODIWGS34	ARO:3004442	16	tet(W/N/W)	AMP42147.1	KU736867.1	tetracycline-resistant ribosomal protection protein	tetracycline antibiotic	antibiotic target protection	OD7	Lumen	DescendingColon	"tet(W/N/W) is a mosaic tetracycline resistance gene and ribosomal protection protein."
ODIWGS34	ARO:3000194	192	tet(W)	CAA10975.1	AJ222769.3	tetracycline-resistant ribosomal protection protein	tetracycline antibiotic	antibiotic target protection	OD7	Lumen	DescendingColon	"Tet(W) is a ribosomal protection protein. It is associated with both conjugative and non conjugative DNA and has been found strains of Clostridioides difficile."
ODIWGS34	ARO:3003982	525	LlmA_23S_CLI	APB03216.1	KX531046.1	Llm 23S ribosomal RNA methyltransferase	lincosamide antibiotic	antibiotic target alteration	OD7	Lumen	DescendingColon	"Lincosamide (Clindamycin) resistant (putative) ribosomal methyltransferase related to the RlmK 23S rRNA methyltransferase COG family. Detected in Paenibacillus sp. LC231, an isolated strain of Paenibacillus found in Lechuguilla Cave, NM, USA. Described by Pawlowski et al. 2016."
ODIWGS34	ARO:3002871	16	tet(37)	AAN28721.1	AF540889.1	tetracycline inactivation enzyme	tetracycline antibiotic	antibiotic inactivation	OD7	Lumen	DescendingColon	"tet(37) is a chromosome-encoded oxidoreductase isolated from an uncultured bacterium that confers resistance to tetracycline."
ODIWGS34	ARO:3007047	59	mefH	QQM99829.1	MW269960.1	major facilitator superfamily (MFS) antibiotic efflux pump	macrolide antibiotic	antibiotic efflux	OD7	Lumen	DescendingColon	"mefH is an mef efflux pump protein."
ODIWGS34	ARO:3002867	16	dfrF	AAD01868.1	AF028812.1	trimethoprim resistant dihydrofolate reductase dfr	diaminopyrimidine antibiotic	antibiotic target replacement	OD7	Lumen	DescendingColon	"dfrF is a chromosome-encoded dihydrofolate reductase found in Streptococcus pyogenes."
ODIWGS34	ARO:3007121	52	tet(O/W)	AAR29969.1	AY485122.1	tetracycline-resistant ribosomal protection protein	tetracycline antibiotic	antibiotic target protection	OD7	Lumen	DescendingColon	"Tet(O/W) is a mosaic tetracycline resistance gene and ribosomal protection protein."
ODIWGS34	ARO:3000196	409	tet(32)	ACH87088.1	EU722333.1	tetracycline-resistant ribosomal protection protein	tetracycline antibiotic	antibiotic target protection	OD7	Lumen	DescendingColon	"Tet(32) is a tetracycline resistance gene similar to Tet(O), and binds to the ribosome to confer tetracycline resistance as a ribosomal protection protein."
ODIWGS34	ARO:3000567	53	tet(40)	CAM12479.1	AM419751.1	major facilitator superfamily (MFS) antibiotic efflux pump	tetracycline antibiotic	antibiotic efflux	OD7	Lumen	DescendingColon	"Tet40 is a tetracycline efflux pump found in the Gram-positive Clostridium. It is similar to tetA(P)."
ODIWGS34	ARO:3004253	24	vanU_in_vanG_cl	ABA71726.1	DQ212986.1	glycopeptide resistance gene cluster;vanU	glycopeptide antibiotic	antibiotic target alteration	OD7	Lumen	DescendingColon	"Also known as vanUG, is a vanG variant found in the vanG gene cluster."
ODIWGS34	ARO:3007122	43	tet(O/W/32/O)	ABF69686.1	DQ525023.1	tetracycline-resistant ribosomal protection protein	tetracycline antibiotic	antibiotic target protection	OD7	Lumen	DescendingColon	"Tet(O/W/32/O) is a mosaic tetracycline resistance gene and ribosomal protection protein."
ODIWGS34	ARO:3000216	12	acrB	AAC73564.1	U00096.3	resistance-nodulation-cell division (RND) antibiotic efflux pump	cephalosporin;disinfecting agents and antiseptics;fluoroquinolone antibiotic;glycylcycline;penam;phenicol antibiotic;rifamycin antibiotic;tetracycline antibiotic	antibiotic efflux	OD7	Lumen	DescendingColon	"Protein subunit of AcrA-AcrB-TolC multidrug efflux complex. AcrB functions as a herterotrimer which forms the inner membrane component and is primarily responsible for substrate recognition and energy transduction by acting as a drug/proton antiporter."
ODIWGS34	ARO:3000190	316	tet(O)	AAA23033.2	M18896.2	tetracycline-resistant ribosomal protection protein	tetracycline antibiotic	antibiotic target protection	OD7	Lumen	DescendingColon	"Tet(O) is a ribosomal protection protein. It is associated with conjugative plasmids."
ODIWGS34	ARO:3000245	119	RbpA	ADV91011.1	HQ203032.1	RbpA bacterial RNA polymerase-binding protein	rifamycin antibiotic	antibiotic target protection	OD7	Lumen	DescendingColon	"RNA-polymerase binding protein which confers resistance to rifampin."
ODIWGS34	ARO:3007119	165	tet(O/32/O)	CAC41371.2	AJ295238.3	tetracycline-resistant ribosomal protection protein	tetracycline antibiotic	antibiotic target protection	OD7	Lumen	DescendingColon	"Tet(O/32/O) is a mosaic tetracycline resistance gene and ribosomal protection protein."
ODIWGS35	ARO:3000190	18	tet(O)	AAA23033.2	M18896.2	tetracycline-resistant ribosomal protection protein	tetracycline antibiotic	antibiotic target protection	OD9	Lumen	Ileum	"Tet(O) is a ribosomal protection protein. It is associated with conjugative plasmids."
ODIWGS35	ARO:3000499	19	AcrE	AAC76297.1	U00096.1	resistance-nodulation-cell division (RND) antibiotic efflux pump	cephalosporin;cephamycin;fluoroquinolone antibiotic;penam	antibiotic efflux	OD9	Lumen	Ileum	"AcrE is a membrane fusion protein, similar to AcrA."
ODIWGS35	ARO:3003549	37	mdtO	BAE78083.1	AP009048.1	major facilitator superfamily (MFS) antibiotic efflux pump	disinfecting agents and antiseptics;nucleoside antibiotic	antibiotic efflux	OD9	Lumen	Ileum	"Multidrug resistance efflux pump. Could be involved in resistance to puromycin, acriflavine and tetraphenylarsonium chloride."
ODIWGS35	ARO:3000074	31	emrB	AAC75733.1	U00096.1	major facilitator superfamily (MFS) antibiotic efflux pump	fluoroquinolone antibiotic	antibiotic efflux	OD9	Lumen	Ileum	"emrB is a translocase in the emrB -TolC efflux protein in E. coli. It recognizes substrates including carbonyl cyanide m-chlorophenylhydrazone (CCCP), nalidixic acid, and thioloactomycin."
ODIWGS35	ARO:3000833	77	evgS	AAC75429.1	U00096.1	major facilitator superfamily (MFS) antibiotic efflux pump;resistance-nodulation-cell division (RND) antibiotic efflux pump	fluoroquinolone antibiotic;macrolide antibiotic;penam;tetracycline antibiotic	antibiotic efflux	OD9	Lumen	Ileum	"EvgS is a sensor protein that phosphorylates the regulatory protein EvgA. evgS corresponds to 1 locus in Pseudomonas aeruginosa PAO1 and 1 locus in Pseudomonas aeruginosa LESB58."
ODIWGS35	ARO:3003839	29	Mrx	AAS13767.1	AY522923.1	macrolide phosphotransferase (MPH)	macrolide antibiotic	antibiotic inactivation	OD9	Lumen	Ileum	"Mrx is part of the macrolide inactivation gene cluster in Aeromonas hydrophila."
ODIWGS35	ARO:3004043	10	Ecol_acrA	AAC73565.1	U00096.3	resistance-nodulation-cell division (RND) antibiotic efflux pump	cephalosporin;disinfecting agents and antiseptics;fluoroquinolone antibiotic;glycylcycline;penam;phenicol antibiotic;rifamycin antibiotic;tetracycline antibiotic	antibiotic efflux	OD9	Lumen	Ileum	"AcrA is a subunit of the AcrAB-TolC multidrug efflux system that in E. coli."
ODIWGS35	ARO:3002647	15	APH(3')-IIIa	AGV10830.1	CP004067.1	APH(3')	aminoglycoside antibiotic	antibiotic inactivation	OD9	Lumen	Ileum	"APH(3')-IIIa is a plasmid-encoded aminoglycoside phosphotransferase in S. aureus and Enterococcus spp."
ODIWGS35	ARO:3003576	13	eptA	BAE78116.1	AP009048.1	pmr phosphoethanolamine transferase	peptide antibiotic	antibiotic target alteration	OD9	Lumen	Ileum	"PmrC mediates the modification of Lipid A by the addition of 4-amino-4-deoxy-L-arabinose (L-Ara4N) and phosphoethanolamine, resulting in a less negative cell membrane and decreased binding of polymyxin B."
ODIWGS35	ARO:3004253	17	vanU_in_vanG_cl	ABA71726.1	DQ212986.1	glycopeptide resistance gene cluster;vanU	glycopeptide antibiotic	antibiotic target alteration	OD9	Lumen	Ileum	"Also known as vanUG, is a vanG variant found in the vanG gene cluster."
ODIWGS35	ARO:3000616	109	mel	AAL73129.1	AF227521.1	msr-type ABC-F protein	macrolide antibiotic;streptogramin antibiotic	antibiotic target protection	OD9	Lumen	Ileum	"Mel, a homolog of MsrA, is an ABC-F subfamily protein associated with macrolide resistance. It is expressed on the same operon as mefA and mefE, both MFS-type efflux proteins that confer macrolide resistance."
ODIWGS35	ARO:3000676	14	H-NS	BAB35162.1	BA000007.3	major facilitator superfamily (MFS) antibiotic efflux pump;resistance-nodulation-cell division (RND) antibiotic efflux pump	cephalosporin;cephamycin;fluoroquinolone antibiotic;macrolide antibiotic;penam;tetracycline antibiotic	antibiotic efflux	OD9	Lumen	Ileum	"H-NS is a histone-like protein involved in global gene regulation in Gram-negative bacteria. It is a repressor of the membrane fusion protein genes acrE, mdtE, and emrK as well as nearby genes of many RND-type multidrug exporters."
ODIWGS35	ARO:3000216	20	acrB	AAC73564.1	U00096.3	resistance-nodulation-cell division (RND) antibiotic efflux pump	cephalosporin;disinfecting agents and antiseptics;fluoroquinolone antibiotic;glycylcycline;penam;phenicol antibiotic;rifamycin antibiotic;tetracycline antibiotic	antibiotic efflux	OD9	Lumen	Ileum	"Protein subunit of AcrA-AcrB-TolC multidrug efflux complex. AcrB functions as a herterotrimer which forms the inner membrane component and is primarily responsible for substrate recognition and energy transduction by acting as a drug/proton antiporter."
ODIWGS35	ARO:3003002	15	CfxA2	AAD23513.1	AF118110.1	CfxA beta-lactamase	cephamycin	antibiotic inactivation	OD9	Lumen	Ileum	"CfxA2 beta-lactamase is a class A beta-lactamase found in Prevotella intermedia."
ODIWGS35	ARO:3000194	30	tet(W)	CAA10975.1	AJ222769.3	tetracycline-resistant ribosomal protection protein	tetracycline antibiotic	antibiotic target protection	OD9	Lumen	Ileum	"Tet(W) is a ribosomal protection protein. It is associated with both conjugative and non conjugative DNA and has been found strains of Clostridioides difficile."
ODIWGS35	ARO:3003942	34	abcA	XP_753111.1	XM_748018.1	ATP-binding cassette (ABC) antibiotic efflux pump	cephalosporin;penam;peptide antibiotic	antibiotic efflux	OD9	Lumen	Ileum	"AbcA is a multidrug resistant ABC transporter that confers resistance to methicillin, daptomycin, cefotaxime, and moenomycin."
ODIWGS35	ARO:3003982	105	LlmA_23S_CLI	APB03216.1	KX531046.1	Llm 23S ribosomal RNA methyltransferase	lincosamide antibiotic	antibiotic target alteration	OD9	Lumen	Ileum	"Lincosamide (Clindamycin) resistant (putative) ribosomal methyltransferase related to the RlmK 23S rRNA methyltransferase COG family. Detected in Paenibacillus sp. LC231, an isolated strain of Paenibacillus found in Lechuguilla Cave, NM, USA. Described by Pawlowski et al. 2016."
ODIWGS35	ARO:3000237	14	TolC	ACN32294.1	FJ768952.1	ATP-binding cassette (ABC) antibiotic efflux pump;major facilitator superfamily (MFS) antibiotic efflux pump;resistance-nodulation-cell division (RND) antibiotic efflux pump	aminocoumarin antibiotic;aminoglycoside antibiotic;carbapenem;cephalosporin;cephamycin;disinfecting agents and antiseptics;fluoroquinolone antibiotic;glycylcycline;macrolide antibiotic;penam;penem;peptide antibiotic;phenicol antibiotic;rifamycin antibiotic;tetracycline antibiotic	antibiotic efflux	OD9	Lumen	Ileum	"TolC is a protein subunit of many multidrug efflux complexes in Gram negative bacteria. It is an outer membrane efflux protein and is constitutively open. Regulation of efflux activity is often at its periplasmic entrance by other components of the efflux complex."
ODIWGS35	ARO:3000828	38	baeR	BAA15935.1	AP009048.1	resistance-nodulation-cell division (RND) antibiotic efflux pump	aminocoumarin antibiotic;aminoglycoside antibiotic	antibiotic efflux	OD9	Lumen	Ileum	"BaeR is a response regulator that promotes the expression of MdtABC and AcrD efflux complexes."
ODIWGS35	ARO:3000319	23	mphC	BAA34540.1	AB013298.1	macrolide phosphotransferase (MPH)	macrolide antibiotic	antibiotic inactivation	OD9	Lumen	Ileum	"The mphC gene was identified from Staphylococcus aureus. This gene shows similarity to mphB gene from Escherchia coli."
ODIWGS35	ARO:3000792	20	mdtA	AAC75135.2	U00096.1	resistance-nodulation-cell division (RND) antibiotic efflux pump	aminocoumarin antibiotic	antibiotic efflux	OD9	Lumen	Ileum	"MdtA is the membrane fusion protein of the multidrug efflux complex mdtABC."
ODIWGS35	ARO:3000491	28	acrD	BAA16344.1	AP009048.1	resistance-nodulation-cell division (RND) antibiotic efflux pump	aminoglycoside antibiotic	antibiotic efflux	OD9	Lumen	Ileum	"AcrD is an aminoglycoside efflux pump expressed in E. coli. Its expression can be induced by indole, and is regulated by baeRS and cpxAR."
ODIWGS35	ARO:3001329	22	mdtG	ABV18113.1	CP000800.1	major facilitator superfamily (MFS) antibiotic efflux pump	phosphonic acid antibiotic	antibiotic efflux	OD9	Lumen	Ileum	"The MdtG protein, also named YceE, appears to be a member of the major facilitator superfamily of transporters, and it has been reported, when overexpressed, to increase fosfomycin and deoxycholate resistances. mdtG is a member of the marA-soxS-rob regulon."
ODIWGS37	ARO:3000186	62	tet(M)	BAB82500.1	AB039845.1	tetracycline-resistant ribosomal protection protein	tetracycline antibiotic	antibiotic target protection	OD3	Mucosa	TransverseColon	"Tet(M) is a ribosomal protection protein that confers tetracycline resistance. It is found on transposable DNA elements and its horizontal transfer between bacterial species has been documented."
ODIWGS37	ARO:3002626	22	ANT(6)-Ia	AHE40557.1	KF648874.1	ANT(6)	aminoglycoside antibiotic	antibiotic inactivation	OD3	Mucosa	TransverseColon	"ANT(6)-Ia is an aminoglycoside nucleotidyltransferase gene encoded by plasmids and chromosomes in Staphylococcus epidermidis, E. faecium, Streptococcus suis, S. aureus, E. faecalis and Streptococcus mitis."
ODIWGS37	ARO:3000300	57	lsaA	AAO43110.1	AY225127.1	lsa-type ABC-F protein	lincosamide antibiotic;pleuromutilin antibiotic;streptogramin A antibiotic;streptogramin B antibiotic;streptogramin antibiotic	antibiotic target protection	OD3	Mucosa	TransverseColon	"LsaA is an ABC-F subfamily protein expressed in Enterococcus faecalis. It confers resistance to clindamycin, quinupristin-dalfopristin, and dalfopristin."
ODIWGS37	ARO:3004580	14	Kpne_KpnE	BAH63251.1	AP006725.1	small multidrug resistance (SMR) antibiotic efflux pump	aminoglycoside antibiotic;cephalosporin;disinfecting agents and antiseptics;macrolide antibiotic;peptide antibiotic;rifamycin antibiotic;tetracycline antibiotic	antibiotic efflux	OD3	Mucosa	TransverseColon	"KpnE subunit of KpnEF resembles EbrAB from E. coli. Mutation in KpnEF resulted in increased susceptibility to cefepime, ceftriaxon, colistin, erythromycin, rifampin, tetracycline, and streptomycin as well as enhanced sensitivity toward sodium dodecyl sulfate, deoxycholate, dyes, benzalkonium chloride, chlorhexidine, and triclosan."
ODIWGS37	ARO:3000616	164	mel	AAL73129.1	AF227521.1	msr-type ABC-F protein	macrolide antibiotic;streptogramin antibiotic	antibiotic target protection	OD3	Mucosa	TransverseColon	"Mel, a homolog of MsrA, is an ABC-F subfamily protein associated with macrolide resistance. It is expressed on the same operon as mefA and mefE, both MFS-type efflux proteins that confer macrolide resistance."
ODIWGS37	ARO:3000074	19	emrB	AAC75733.1	U00096.1	major facilitator superfamily (MFS) antibiotic efflux pump	fluoroquinolone antibiotic	antibiotic efflux	OD3	Mucosa	TransverseColon	"emrB is a translocase in the emrB -TolC efflux protein in E. coli. It recognizes substrates including carbonyl cyanide m-chlorophenylhydrazone (CCCP), nalidixic acid, and thioloactomycin."
ODIWGS37	ARO:3000237	33	TolC	ACN32294.1	FJ768952.1	ATP-binding cassette (ABC) antibiotic efflux pump;major facilitator superfamily (MFS) antibiotic efflux pump;resistance-nodulation-cell division (RND) antibiotic efflux pump	aminocoumarin antibiotic;aminoglycoside antibiotic;carbapenem;cephalosporin;cephamycin;disinfecting agents and antiseptics;fluoroquinolone antibiotic;glycylcycline;macrolide antibiotic;penam;penem;peptide antibiotic;phenicol antibiotic;rifamycin antibiotic;tetracycline antibiotic	antibiotic efflux	OD3	Mucosa	TransverseColon	"TolC is a protein subunit of many multidrug efflux complexes in Gram negative bacteria. It is an outer membrane efflux protein and is constitutively open. Regulation of efflux activity is often at its periplasmic entrance by other components of the efflux complex."
ODIWGS37	ARO:3003948	999	efrA	WP_104671188.1	NZ_PTWF01000025.1	ATP-binding cassette (ABC) antibiotic efflux pump	fluoroquinolone antibiotic;macrolide antibiotic;rifamycin antibiotic	antibiotic efflux	OD3	Mucosa	TransverseColon	"efrA is a part of the EfrAB efflux pump, and both efrA and efrB are necessary to confer drug resistance."
ODIWGS37	ARO:3000795	26	mdtE	BAE77781.1	AP009048.1	resistance-nodulation-cell division (RND) antibiotic efflux pump	fluoroquinolone antibiotic;macrolide antibiotic;penam	antibiotic efflux	OD3	Mucosa	TransverseColon	"MdtE is the membrane fusion protein of the MdtEF multidrug efflux complex. It shares 70% sequence similarity with AcrA."
ODIWGS37	ARO:3000263	26	marA	BAA15221.2	AP009048.1	General Bacterial Porin with reduced permeability to beta-lactams;resistance-nodulation-cell division (RND) antibiotic efflux pump	carbapenem;cephalosporin;cephamycin;disinfecting agents and antiseptics;fluoroquinolone antibiotic;glycylcycline;monobactam;penam;penem;phenicol antibiotic;rifamycin antibiotic;tetracycline antibiotic	antibiotic efflux;reduced permeability to antibiotic	OD3	Mucosa	TransverseColon	"In the presence of antibiotic stress, E. coli overexpresses the global activator protein MarA, which besides inducing MDR efflux pump AcrAB, also down- regulates synthesis of the porin OmpF."
ODIWGS37	ARO:3000796	101	mdtF	AAC76539.1	U00096.1	resistance-nodulation-cell division (RND) antibiotic efflux pump	fluoroquinolone antibiotic;macrolide antibiotic;penam	antibiotic efflux	OD3	Mucosa	TransverseColon	"MdtF is the multidrug inner membrane transporter for the MdtEF-TolC efflux complex."
ODIWGS37	ARO:3000830	121	cpxA	BAB38260.1	BA000007.3	resistance-nodulation-cell division (RND) antibiotic efflux pump	aminocoumarin antibiotic;aminoglycoside antibiotic	antibiotic efflux	OD3	Mucosa	TransverseColon	"CpxA is a membrane-localized sensor kinase that is activated by envelope stress. It starts a kinase cascade that activates CpxR, which promotes efflux complex expression."
ODIWGS37	ARO:3000194	12	tet(W)	CAA10975.1	AJ222769.3	tetracycline-resistant ribosomal protection protein	tetracycline antibiotic	antibiotic target protection	OD3	Mucosa	TransverseColon	"Tet(W) is a ribosomal protection protein. It is associated with both conjugative and non conjugative DNA and has been found strains of Clostridioides difficile."
ODIWGS37	ARO:3003950	259	msbA	AAC74000.1	U00096.3	ATP-binding cassette (ABC) antibiotic efflux pump	nitroimidazole antibiotic	antibiotic efflux	OD3	Mucosa	TransverseColon	"MsbA is a multidrug resistance transporter homolog from E. coli and belongs to a superfamily of transporters that contain an adenosine triphosphate (ATP) binding cassette (ABC) which is also called a nucleotide-binding domain (NBD). MsbA is a member of the MDR-ABC transporter group by sequence homology. MsbA transports lipid A, a major component of the bacterial outer cell membrane, and is the o…
ODIWGS37	ARO:3002871	39	tet(37)	AAN28721.1	AF540889.1	tetracycline inactivation enzyme	tetracycline antibiotic	antibiotic inactivation	OD3	Mucosa	TransverseColon	"tet(37) is a chromosome-encoded oxidoreductase isolated from an uncultured bacterium that confers resistance to tetracycline."
ODIWGS37	ARO:3000491	79	acrD	BAA16344.1	AP009048.1	resistance-nodulation-cell division (RND) antibiotic efflux pump	aminoglycoside antibiotic	antibiotic efflux	OD3	Mucosa	TransverseColon	"AcrD is an aminoglycoside efflux pump expressed in E. coli. Its expression can be induced by indole, and is regulated by baeRS and cpxAR."
ODIWGS37	ARO:3000191	311	tet(Q)	CAA79727.1	Z21523.1	tetracycline-resistant ribosomal protection protein	tetracycline antibiotic	antibiotic target protection	OD3	Mucosa	TransverseColon	"Tet(Q) is a ribosomal protection protein. Its gene is associated with a conjugative transposon and has been found in both Gram-positive and Gram-negative bacteria."
ODIWGS37	ARO:3002837	55	lnuC	AAY32951.1	AY928180.1	lincosamide nucleotidyltransferase (LNU)	lincosamide antibiotic	antibiotic inactivation	OD3	Mucosa	TransverseColon	"lnuC is a transposon-mediated nucleotidyltransferase found in Streptococcus agalactiae."
ODIWGS37	ARO:3003576	97	eptA	BAE78116.1	AP009048.1	pmr phosphoethanolamine transferase	peptide antibiotic	antibiotic target alteration	OD3	Mucosa	TransverseColon	"PmrC mediates the modification of Lipid A by the addition of 4-amino-4-deoxy-L-arabinose (L-Ara4N) and phosphoethanolamine, resulting in a less negative cell membrane and decreased binding of polymyxin B."
ODIWGS37	ARO:3000502	145	AcrF	AAC76298.1	U00096.1	resistance-nodulation-cell division (RND) antibiotic efflux pump	cephalosporin;cephamycin;fluoroquinolone antibiotic;penam	antibiotic efflux	OD3	Mucosa	TransverseColon	"AcrF is a inner membrane transporter, similar to AcrB."
ODIWGS37	ARO:3000656	12	AcrS	AAC76296.1	U00096.1	resistance-nodulation-cell division (RND) antibiotic efflux pump	cephalosporin;cephamycin;disinfecting agents and antiseptics;fluoroquinolone antibiotic;glycylcycline;penam;phenicol antibiotic;rifamycin antibiotic;tetracycline antibiotic	antibiotic efflux	OD3	Mucosa	TransverseColon	"AcrS is a repressor of the AcrAB efflux complex and is associated with the expression of AcrEF. AcrS is believed to regulate a switch between AcrAB and AcrEF efflux."
ODIWGS37	ARO:3001329	142	mdtG	ABV18113.1	CP000800.1	major facilitator superfamily (MFS) antibiotic efflux pump	phosphonic acid antibiotic	antibiotic efflux	OD3	Mucosa	TransverseColon	"The MdtG protein, also named YceE, appears to be a member of the major facilitator superfamily of transporters, and it has been reported, when overexpressed, to increase fosfomycin and deoxycholate resistances. mdtG is a member of the marA-soxS-rob regulon."
ODIWGS37	ARO:3003949	395	efrB	CDO61516.1	HG970103.1	ATP-binding cassette (ABC) antibiotic efflux pump	fluoroquinolone antibiotic;macrolide antibiotic;rifamycin antibiotic	antibiotic efflux	OD3	Mucosa	TransverseColon	"efrB is a part of the EfrAB efflux pump, and both efrA and efrB are necessary to confer multidrug resistance."
ODIWGS37	ARO:3000832	17	evgA	BAB36671.1	BA000007.3	major facilitator superfamily (MFS) antibiotic efflux pump;resistance-nodulation-cell division (RND) antibiotic efflux pump	fluoroquinolone antibiotic;macrolide antibiotic;penam;tetracycline antibiotic	antibiotic efflux	OD3	Mucosa	TransverseColon	"EvgA, when phosphorylated, is a positive regulator for efflux protein complexes emrKY and mdtEF. While usually phosphorylated in a EvgS dependent manner, it can be phosphorylated in the absence of EvgS when overexpressed."
ODIWGS37	ARO:3004043	52	Ecol_acrA	AAC73565.1	U00096.3	resistance-nodulation-cell division (RND) antibiotic efflux pump	cephalosporin;disinfecting agents and antiseptics;fluoroquinolone antibiotic;glycylcycline;penam;phenicol antibiotic;rifamycin antibiotic;tetracycline antibiotic	antibiotic efflux	OD3	Mucosa	TransverseColon	"AcrA is a subunit of the AcrAB-TolC multidrug efflux system that in E. coli."
ODIWGS37	ARO:3003002	29	CfxA2	AAD23513.1	AF118110.1	CfxA beta-lactamase	cephamycin	antibiotic inactivation	OD3	Mucosa	TransverseColon	"CfxA2 beta-lactamase is a class A beta-lactamase found in Prevotella intermedia."
ODIWGS37	ARO:3000833	150	evgS	AAC75429.1	U00096.1	major facilitator superfamily (MFS) antibiotic efflux pump;resistance-nodulation-cell division (RND) antibiotic efflux pump	fluoroquinolone antibiotic;macrolide antibiotic;penam;tetracycline antibiotic	antibiotic efflux	OD3	Mucosa	TransverseColon	"EvgS is a sensor protein that phosphorylates the regulatory protein EvgA. evgS corresponds to 1 locus in Pseudomonas aeruginosa PAO1 and 1 locus in Pseudomonas aeruginosa LESB58."
ODIWGS37	ARO:3003063	10	ykkC	CAB13166.1	AL009126.1	small multidrug resistance (SMR) antibiotic efflux pump	aminoglycoside antibiotic;phenicol antibiotic;tetracycline antibiotic	antibiotic efflux	OD3	Mucosa	TransverseColon	"ykkC is an SMR-type protein that is a subunit of the ykkCD efflux pump."
ODIWGS37	ARO:3003952	120	YojI	AAC75271.1	U00096.3	ATP-binding cassette (ABC) antibiotic efflux pump	peptide antibiotic	antibiotic efflux	OD3	Mucosa	TransverseColon	"YojI mediates resistance to the peptide antibiotic microcin J25 when it is expressed from a multicopy vector. YojI is capable of pumping out microcin molecules. The outer membrane protein TolC in addition to YojI is required for export of microcin J25 out of the cell. Microcin J25 is thus the first known substrate for YojI."
ODIWGS37	ARO:3002986	180	bacA	AAC76093.1	U00096.3	undecaprenyl pyrophosphate related proteins	peptide antibiotic	antibiotic target alteration	OD3	Mucosa	TransverseColon	"The bacA gene product (BacA) recycles undecaprenyl pyrophosphate during cell wall biosynthesis which confers resistance to bacitracin."
ODIWGS37	ARO:3000508	58	gadX	BAE77778.1	AP009048.1	resistance-nodulation-cell division (RND) antibiotic efflux pump	fluoroquinolone antibiotic;macrolide antibiotic;penam	antibiotic efflux	OD3	Mucosa	TransverseColon	"GadX is an AraC-family regulator that promotes mdtEF expression to confer multidrug resistance."
ODIWGS37	ARO:3000216	45	acrB	AAC73564.1	U00096.3	resistance-nodulation-cell division (RND) antibiotic efflux pump	cephalosporin;disinfecting agents and antiseptics;fluoroquinolone antibiotic;glycylcycline;penam;phenicol antibiotic;rifamycin antibiotic;tetracycline antibiotic	antibiotic efflux	OD3	Mucosa	TransverseColon	"Protein subunit of AcrA-AcrB-TolC multidrug efflux complex. AcrB functions as a herterotrimer which forms the inner membrane component and is primarily responsible for substrate recognition and energy transduction by acting as a drug/proton antiporter."
ODIWGS37	ARO:3000190	69	tet(O)	AAA23033.2	M18896.2	tetracycline-resistant ribosomal protection protein	tetracycline antibiotic	antibiotic target protection	OD3	Mucosa	TransverseColon	"Tet(O) is a ribosomal protection protein. It is associated with conjugative plasmids."
ODIWGS37	ARO:3000499	14	AcrE	AAC76297.1	U00096.1	resistance-nodulation-cell division (RND) antibiotic efflux pump	cephalosporin;cephamycin;fluoroquinolone antibiotic;penam	antibiotic efflux	OD3	Mucosa	TransverseColon	"AcrE is a membrane fusion protein, similar to AcrA."
ODIWGS37	ARO:3000829	49	baeS	BAA15934.1	AP009048.1	resistance-nodulation-cell division (RND) antibiotic efflux pump	aminocoumarin antibiotic;aminoglycoside antibiotic	antibiotic efflux	OD3	Mucosa	TransverseColon	"BaeS is a sensor kinase in the BaeSR regulatory system. While it phosphorylates BaeR to increase its activity, BaeS is not necessary for overexpressed BaeR to confer resistance."
ODIWGS37	ARO:3000375	13	ErmB	AAF86219.1	AF242872.1	Erm 23S ribosomal RNA methyltransferase	lincosamide antibiotic;macrolide antibiotic;streptogramin A antibiotic;streptogramin B antibiotic;streptogramin antibiotic	antibiotic target alteration	OD3	Mucosa	TransverseColon	"ErmB confers the MLSb phenotype. Similar to ErmC, expression of ErmB is inducible by erythromycin. The leader peptide causes attenuation of the mRNA and stabilizes the structure preventing further translation. When erythromycin is present, it binds the leader peptide causing a change in conformation allowing for the expression of ErmB."
ODIWGS38	ARO:3000186	1856	tet(M)	BAB82500.1	AB039845.1	tetracycline-resistant ribosomal protection protein	tetracycline antibiotic	antibiotic target protection	OD4	Mucosa	AscendingColon	"Tet(M) is a ribosomal protection protein that confers tetracycline resistance. It is found on transposable DNA elements and its horizontal transfer between bacterial species has been documented."
ODIWGS38	ARO:3002626	109	ANT(6)-Ia	AHE40557.1	KF648874.1	ANT(6)	aminoglycoside antibiotic	antibiotic inactivation	OD4	Mucosa	AscendingColon	"ANT(6)-Ia is an aminoglycoside nucleotidyltransferase gene encoded by plasmids and chromosomes in Staphylococcus epidermidis, E. faecium, Streptococcus suis, S. aureus, E. faecalis and Streptococcus mitis."
ODIWGS38	ARO:3003206	2882	lsaE	AAL05553.1	AF408195.1	lsa-type ABC-F protein	lincosamide antibiotic;pleuromutilin antibiotic;streptogramin antibiotic	antibiotic target protection	OD4	Mucosa	AscendingColon	"lsaE is an ABC-F subfamily protein found in porcine MRSA isolates. It confers resistance to pleuromutilin, lincosamide, and streptogramin A."
ODIWGS38	ARO:3003549	77	mdtO	BAE78083.1	AP009048.1	major facilitator superfamily (MFS) antibiotic efflux pump	disinfecting agents and antiseptics;nucleoside antibiotic	antibiotic efflux	OD4	Mucosa	AscendingColon	"Multidrug resistance efflux pump. Could be involved in resistance to puromycin, acriflavine and tetraphenylarsonium chloride."
ODIWGS38	ARO:3000300	2188	lsaA	AAO43110.1	AY225127.1	lsa-type ABC-F protein	lincosamide antibiotic;pleuromutilin antibiotic;streptogramin A antibiotic;streptogramin B antibiotic;streptogramin antibiotic	antibiotic target protection	OD4	Mucosa	AscendingColon	"LsaA is an ABC-F subfamily protein expressed in Enterococcus faecalis. It confers resistance to clindamycin, quinupristin-dalfopristin, and dalfopristin."
ODIWGS38	ARO:3005009	13	qacE	AEH26330.1	HQ730118.1	major facilitator superfamily (MFS) antibiotic efflux pump	disinfecting agents and antiseptics	antibiotic efflux	OD4	Mucosa	AscendingColon	"QacE is a resistance gene conferring resistance to antiseptics."
ODIWGS38	ARO:3000793	89	mdtB	AAC75136.1	U00096.1	resistance-nodulation-cell division (RND) antibiotic efflux pump	aminocoumarin antibiotic	antibiotic efflux	OD4	Mucosa	AscendingColon	"MdtB is a transporter that forms a heteromultimer complex with MdtC to form a multidrug transporter. MdtBC is part of the MdtABC-TolC efflux complex."
ODIWGS38	ARO:3000616	572	mel	AAL73129.1	AF227521.1	msr-type ABC-F protein	macrolide antibiotic;streptogramin antibiotic	antibiotic target protection	OD4	Mucosa	AscendingColon	"Mel, a homolog of MsrA, is an ABC-F subfamily protein associated with macrolide resistance. It is expressed on the same operon as mefA and mefE, both MFS-type efflux proteins that confer macrolide resistance."
ODIWGS38	ARO:3004254	21	vanV_in_vanB_cl	AAO82019.1	AE016830.1	glycopeptide resistance gene cluster;vanV	glycopeptide antibiotic	antibiotic target alteration	OD4	Mucosa	AscendingColon	"Also known as vanVB, is a vanV variant found in the vanB gene cluster. It is found in some but not all vanB operons in E. faecalis, suggesting the existence of varied gene compositions in vanB operons."
ODIWGS38	ARO:3000074	51	emrB	AAC75733.1	U00096.1	major facilitator superfamily (MFS) antibiotic efflux pump	fluoroquinolone antibiotic	antibiotic efflux	OD4	Mucosa	AscendingColon	"emrB is a translocase in the emrB -TolC efflux protein in E. coli. It recognizes substrates including carbonyl cyanide m-chlorophenylhydrazone (CCCP), nalidixic acid, and thioloactomycin."
ODIWGS38	ARO:3000237	48	TolC	ACN32294.1	FJ768952.1	ATP-binding cassette (ABC) antibiotic efflux pump;major facilitator superfamily (MFS) antibiotic efflux pump;resistance-nodulation-cell division (RND) antibiotic efflux pump	aminocoumarin antibiotic;aminoglycoside antibiotic;carbapenem;cephalosporin;cephamycin;disinfecting agents and antiseptics;fluoroquinolone antibiotic;glycylcycline;macrolide antibiotic;penam;penem;peptide antibiotic;phenicol antibiotic;rifamycin antibiotic;tetracycline antibiotic	antibiotic efflux	OD4	Mucosa	AscendingColon	"TolC is a protein subunit of many multidrug efflux complexes in Gram negative bacteria. It is an outer membrane efflux protein and is constitutively open. Regulation of efflux activity is often at its periplasmic entrance by other components of the efflux complex."
ODIWGS38	ARO:3007015	16	qacG	WP_015740450.1	NG_051904.1	small multidrug resistance (SMR) antibiotic efflux pump	disinfecting agents and antiseptics	antibiotic efflux	OD4	Mucosa	AscendingColon	"qacG is a small multidrug resistance efflux pump that confers resistance to benzalkonium chloride and ethidium bromide."
ODIWGS38	ARO:3003948	53534	efrA	WP_104671188.1	NZ_PTWF01000025.1	ATP-binding cassette (ABC) antibiotic efflux pump	fluoroquinolone antibiotic;macrolide antibiotic;rifamycin antibiotic	antibiotic efflux	OD4	Mucosa	AscendingColon	"efrA is a part of the EfrAB efflux pump, and both efrA and efrB are necessary to confer drug resistance."
ODIWGS38	ARO:3000795	27	mdtE	BAE77781.1	AP009048.1	resistance-nodulation-cell division (RND) antibiotic efflux pump	fluoroquinolone antibiotic;macrolide antibiotic;penam	antibiotic efflux	OD4	Mucosa	AscendingColon	"MdtE is the membrane fusion protein of the MdtEF multidrug efflux complex. It shares 70% sequence similarity with AcrA."
ODIWGS38	ARO:3005098	13	qacL	AAZ42322.1	DQ149925.1	small multidrug resistance (SMR) antibiotic efflux pump	disinfecting agents and antiseptics	antibiotic efflux	OD4	Mucosa	AscendingColon	"A subunit of the qac multidrug efflux pump in Vibrio cholerae."
ODIWGS38	ARO:3000796	113	mdtF	AAC76539.1	U00096.1	resistance-nodulation-cell division (RND) antibiotic efflux pump	fluoroquinolone antibiotic;macrolide antibiotic;penam	antibiotic efflux	OD4	Mucosa	AscendingColon	"MdtF is the multidrug inner membrane transporter for the MdtEF-TolC efflux complex."
ODIWGS38	ARO:3000830	98	cpxA	BAB38260.1	BA000007.3	resistance-nodulation-cell division (RND) antibiotic efflux pump	aminocoumarin antibiotic;aminoglycoside antibiotic	antibiotic efflux	OD4	Mucosa	AscendingColon	"CpxA is a membrane-localized sensor kinase that is activated by envelope stress. It starts a kinase cascade that activates CpxR, which promotes efflux complex expression."
ODIWGS38	ARO:3007120	278	tet(O/M/O)	AAR29485.1	AY394560.1	tetracycline-resistant ribosomal protection protein	tetracycline antibiotic	antibiotic target protection	OD4	Mucosa	AscendingColon	"Tet(O/M/O) is a mosaic tetracycline resistance gene and ribosomal protection protein."
ODIWGS38	ARO:3004442	217	tet(W/N/W)	AMP42147.1	KU736867.1	tetracycline-resistant ribosomal protection protein	tetracycline antibiotic	antibiotic target protection	OD4	Mucosa	AscendingColon	"tet(W/N/W) is a mosaic tetracycline resistance gene and ribosomal protection protein."
ODIWGS38	ARO:3002868	422	dfrG	BAE15963.1	AB205645.1	trimethoprim resistant dihydrofolate reductase dfr	diaminopyrimidine antibiotic	antibiotic target replacement	OD4	Mucosa	AscendingColon	"dfrG is a plasmid-encoded dihydrofolate reductase found in Staphylococcus aureus."
ODIWGS38	ARO:3000194	1206	tet(W)	CAA10975.1	AJ222769.3	tetracycline-resistant ribosomal protection protein	tetracycline antibiotic	antibiotic target protection	OD4	Mucosa	AscendingColon	"Tet(W) is a ribosomal protection protein. It is associated with both conjugative and non conjugative DNA and has been found strains of Clostridioides difficile."
ODIWGS38	ARO:3003950	12835	msbA	AAC74000.1	U00096.3	ATP-binding cassette (ABC) antibiotic efflux pump	nitroimidazole antibiotic	antibiotic efflux	OD4	Mucosa	AscendingColon	"MsbA is a multidrug resistance transporter homolog from E. coli and belongs to a superfamily of transporters that contain an adenosine triphosphate (ATP) binding cassette (ABC) which is also called a nucleotide-binding domain (NBD). MsbA is a member of the MDR-ABC transporter group by sequence homology. MsbA transports lipid A, a major component of the bacterial outer cell membrane, and is the o…
ODIWGS38	ARO:3002871	10	tet(37)	AAN28721.1	AF540889.1	tetracycline inactivation enzyme	tetracycline antibiotic	antibiotic inactivation	OD4	Mucosa	AscendingColon	"tet(37) is a chromosome-encoded oxidoreductase isolated from an uncultured bacterium that confers resistance to tetracycline."
ODIWGS38	ARO:3007047	260	mefH	QQM99829.1	MW269960.1	major facilitator superfamily (MFS) antibiotic efflux pump	macrolide antibiotic	antibiotic efflux	OD4	Mucosa	AscendingColon	"mefH is an mef efflux pump protein."
ODIWGS38	ARO:3000491	96	acrD	BAA16344.1	AP009048.1	resistance-nodulation-cell division (RND) antibiotic efflux pump	aminoglycoside antibiotic	antibiotic efflux	OD4	Mucosa	AscendingColon	"AcrD is an aminoglycoside efflux pump expressed in E. coli. Its expression can be induced by indole, and is regulated by baeRS and cpxAR."
ODIWGS38	ARO:3000191	12921	tet(Q)	CAA79727.1	Z21523.1	tetracycline-resistant ribosomal protection protein	tetracycline antibiotic	antibiotic target protection	OD4	Mucosa	AscendingColon	"Tet(Q) is a ribosomal protection protein. Its gene is associated with a conjugative transposon and has been found in both Gram-positive and Gram-negative bacteria."
ODIWGS38	ARO:3003730	10081	Bbif_ileS_MUP	ADP36409.1	CP001840.1	antibiotic-resistant isoleucyl-tRNA synthetase (ileS)	mupirocin-like antibiotic	antibiotic target alteration	OD4	Mucosa	AscendingColon	"Bifidobacteria have an intrinsically resistant form of ileS (isoleucyl-tRNA synthetase) that confers resistance to mupirocin."
ODIWGS38	ARO:3002837	269	lnuC	AAY32951.1	AY928180.1	lincosamide nucleotidyltransferase (LNU)	lincosamide antibiotic	antibiotic inactivation	OD4	Mucosa	AscendingColon	"lnuC is a transposon-mediated nucleotidyltransferase found in Streptococcus agalactiae."
ODIWGS38	ARO:3003576	24	eptA	BAE78116.1	AP009048.1	pmr phosphoethanolamine transferase	peptide antibiotic	antibiotic target alteration	OD4	Mucosa	AscendingColon	"PmrC mediates the modification of Lipid A by the addition of 4-amino-4-deoxy-L-arabinose (L-Ara4N) and phosphoethanolamine, resulting in a less negative cell membrane and decreased binding of polymyxin B."
ODIWGS38	ARO:3004038	30	Paer_emrE	AAG08375.1	AE004091.2	small multidrug resistance (SMR) antibiotic efflux pump	aminoglycoside antibiotic	antibiotic efflux	OD4	Mucosa	AscendingColon	"EmrE is a small multidrug transporter that functions as a homodimer and that couples the efflux of small polyaromatic cations from the cell with the import of protons down an electrochemical gradient. Confers resistance to tetraphenylphosphonium, methyl viologen, gentamicin, kanamycin, and neomycin."
ODIWGS38	ARO:3000768	61	abeS	ACJ59254.1	CP001172.1	small multidrug resistance (SMR) antibiotic efflux pump	aminocoumarin antibiotic;macrolide antibiotic	antibiotic efflux	OD4	Mucosa	AscendingColon	"AbeS in an efflux pump of the SMR family of transporters found in Acinetobacter baumannii."
ODIWGS38	ARO:3007121	267	tet(O/W)	AAR29969.1	AY485122.1	tetracycline-resistant ribosomal protection protein	tetracycline antibiotic	antibiotic target protection	OD4	Mucosa	AscendingColon	"Tet(O/W) is a mosaic tetracycline resistance gene and ribosomal protection protein."
ODIWGS38	ARO:3004480	136938	Bado_rpoB_RIF	WP_041777404.1	NC_008618.1	rifamycin-resistant beta-subunit of RNA polymerase (rpoB)	peptide antibiotic;rifamycin antibiotic	antibiotic target alteration;antibiotic target replacement	OD4	Mucosa	AscendingColon	"Bifidobacterium are antibiotic resistant probiotics are prescribed to upkeep the population beneficial bacteria in the gut microbiome. However, horizontal gene transfer among gut microbes could create harmful antibiotic-resistant pathogenic bacteria, such as Mycobacterium tuberculosis. Lokesh et al. analyzed Bifidobacterium antitubercular drug resistance and mutations in rpoB. They found that B.…
ODIWGS38	ARO:3000502	78	AcrF	AAC76298.1	U00096.1	resistance-nodulation-cell division (RND) antibiotic efflux pump	cephalosporin;cephamycin;fluoroquinolone antibiotic;penam	antibiotic efflux	OD4	Mucosa	AscendingColon	"AcrF is a inner membrane transporter, similar to AcrB."
ODIWGS38	ARO:3000518	71	CRP	BAE77933.1	AP009048.1	resistance-nodulation-cell division (RND) antibiotic efflux pump	fluoroquinolone antibiotic;macrolide antibiotic;penam	antibiotic efflux	OD4	Mucosa	AscendingColon	"CRP is a global regulator that represses MdtEF multidrug efflux pump expression."
ODIWGS38	ARO:3000195	7312	tetB(P)	AAA20117.1	L20800.1	tetracycline-resistant ribosomal protection protein	tetracycline antibiotic	antibiotic target protection	OD4	Mucosa	AscendingColon	"TetB(P) is a tetracycline ribosomal protection protein found on the same operon as tetA(P), a tetracycline efflux protein."
ODIWGS38	ARO:3007124	2654	tet(W/32/O)	AAL09826.1	AY049983.2	tetracycline-resistant ribosomal protection protein	tetracycline antibiotic	antibiotic target protection	OD4	Mucosa	AscendingColon	"Tet(W/32/O) is a mosaic tetracycline resistance gene and ribosomal protection protein."
ODIWGS38	ARO:3000196	4621	tet(32)	ACH87088.1	EU722333.1	tetracycline-resistant ribosomal protection protein	tetracycline antibiotic	antibiotic target protection	OD4	Mucosa	AscendingColon	"Tet(32) is a tetracycline resistance gene similar to Tet(O), and binds to the ribosome to confer tetracycline resistance as a ribosomal protection protein."
ODIWGS38	ARO:3000567	23	tet(40)	CAM12479.1	AM419751.1	major facilitator superfamily (MFS) antibiotic efflux pump	tetracycline antibiotic	antibiotic efflux	OD4	Mucosa	AscendingColon	"Tet40 is a tetracycline efflux pump found in the Gram-positive Clostridium. It is similar to tetA(P)."
ODIWGS38	ARO:3001329	7671	mdtG	ABV18113.1	CP000800.1	major facilitator superfamily (MFS) antibiotic efflux pump	phosphonic acid antibiotic	antibiotic efflux	OD4	Mucosa	AscendingColon	"The MdtG protein, also named YceE, appears to be a member of the major facilitator superfamily of transporters, and it has been reported, when overexpressed, to increase fosfomycin and deoxycholate resistances. mdtG is a member of the marA-soxS-rob regulon."
ODIWGS38	ARO:3003949	31439	efrB	CDO61516.1	HG970103.1	ATP-binding cassette (ABC) antibiotic efflux pump	fluoroquinolone antibiotic;macrolide antibiotic;rifamycin antibiotic	antibiotic efflux	OD4	Mucosa	AscendingColon	"efrB is a part of the EfrAB efflux pump, and both efrA and efrB are necessary to confer multidrug resistance."
ODIWGS38	ARO:3003551	477	emeA	BAC11911.1	AB091338.1	multidrug and toxic compound extrusion (MATE) transporter	disinfecting agents and antiseptics	antibiotic efflux	OD4	Mucosa	AscendingColon	"A multidrug efflux pump from Enterococcus faecalis. There exist efflux activity of several antimicrobial agents such as DAPI, Hoechst 33342 and acriflavine. Efflux of DAPI via EmeA was strongly inhibited by reserpine."
ODIWGS38	ARO:3004253	245	vanU_in_vanG_cl	ABA71726.1	DQ212986.1	glycopeptide resistance gene cluster;vanU	glycopeptide antibiotic	antibiotic target alteration	OD4	Mucosa	AscendingColon	"Also known as vanUG, is a vanG variant found in the vanG gene cluster."
ODIWGS38	ARO:3002897	123	SAT-4	AAB53445.1	U01945.1	streptothricin acetyltransferase (SAT)	nucleoside antibiotic	antibiotic inactivation	OD4	Mucosa	AscendingColon	"SAT-4 is a plasmid-mediated streptothricin acetyltransferase and streptothricin (a nucleoside antibiotic) resistant determinant. Originally described from a Campylobacter coli BE/G4 plasmid gene sequence by Jacob et al, 1994."
ODIWGS38	ARO:3003578	258	PmrF	AAC75314.1	U00096.1	pmr phosphoethanolamine transferase	peptide antibiotic	antibiotic target alteration	OD4	Mucosa	AscendingColon	"PmrF is required for the synthesis and transfer of 4-amino-4-deoxy-L-arabinose (Ara4N) to Lipid A, which allows gram-negative bacteria to resist the antimicrobial activity of cationic antimicrobial peptides and antibiotics such as polymyxin. pmrF corresponds to 1 locus in Pseudomonas aeruginosa PAO1 and 1 locus in Pseudomonas aeruginosa LESB58."
ODIWGS38	ARO:3007122	558	tet(O/W/32/O)	ABF69686.1	DQ525023.1	tetracycline-resistant ribosomal protection protein	tetracycline antibiotic	antibiotic target protection	OD4	Mucosa	AscendingColon	"Tet(O/W/32/O) is a mosaic tetracycline resistance gene and ribosomal protection protein."
ODIWGS38	ARO:3005010	16	qacEdelta1	AAC44316.1	U49101.1	major facilitator superfamily (MFS) antibiotic efflux pump	disinfecting agents and antiseptics	antibiotic efflux	OD4	Mucosa	AscendingColon	"QacEdelta1 is a resistance gene conferring resistance to antiseptics. It is different from QacE only at the 3'-terminus."
ODIWGS38	ARO:3003063	458	ykkC	CAB13166.1	AL009126.1	small multidrug resistance (SMR) antibiotic efflux pump	aminoglycoside antibiotic;phenicol antibiotic;tetracycline antibiotic	antibiotic efflux	OD4	Mucosa	AscendingColon	"ykkC is an SMR-type protein that is a subunit of the ykkCD efflux pump."
ODIWGS38	ARO:3003952	1368	YojI	AAC75271.1	U00096.3	ATP-binding cassette (ABC) antibiotic efflux pump	peptide antibiotic	antibiotic efflux	OD4	Mucosa	AscendingColon	"YojI mediates resistance to the peptide antibiotic microcin J25 when it is expressed from a multicopy vector. YojI is capable of pumping out microcin molecules. The outer membrane protein TolC in addition to YojI is required for export of microcin J25 out of the cell. Microcin J25 is thus the first known substrate for YojI."
ODIWGS38	ARO:3004039	18	Ecol_emrE	CAA77936.1	Z11877.1	small multidrug resistance (SMR) antibiotic efflux pump	macrolide antibiotic	antibiotic efflux	OD4	Mucosa	AscendingColon	"Member of the small MDR (multidrug resistance) family of transporters; in Escherichia coli this protein provides resistance against a number of positively charged compounds including ethidium bromide and erythromycin; proton-dependent secondary transporter which exchanges protons for compound translocation."
ODIWGS38	ARO:3002986	1967	bacA	AAC76093.1	U00096.3	undecaprenyl pyrophosphate related proteins	peptide antibiotic	antibiotic target alteration	OD4	Mucosa	AscendingColon	"The bacA gene product (BacA) recycles undecaprenyl pyrophosphate during cell wall biosynthesis which confers resistance to bacitracin."
ODIWGS38	ARO:3003064	62	ykkD	CAB13167.1	AL009126.1	small multidrug resistance (SMR) antibiotic efflux pump	aminoglycoside antibiotic;phenicol antibiotic;tetracycline antibiotic	antibiotic efflux	OD4	Mucosa	AscendingColon	"ykkD is an SMR-type protein that is a subunit of the ykkCD efflux pump."
ODIWGS38	ARO:3000216	52	acrB	AAC73564.1	U00096.3	resistance-nodulation-cell division (RND) antibiotic efflux pump	cephalosporin;disinfecting agents and antiseptics;fluoroquinolone antibiotic;glycylcycline;penam;phenicol antibiotic;rifamycin antibiotic;tetracycline antibiotic	antibiotic efflux	OD4	Mucosa	AscendingColon	"Protein subunit of AcrA-AcrB-TolC multidrug efflux complex. AcrB functions as a herterotrimer which forms the inner membrane component and is primarily responsible for substrate recognition and energy transduction by acting as a drug/proton antiporter."
ODIWGS38	ARO:3002628	132	aad(6)	AAU10334.1	AY712687.1	ANT(6)	aminoglycoside antibiotic	antibiotic inactivation	OD4	Mucosa	AscendingColon	"ANT(6)-Ia/aad(6) is a plasmid-encoded aminoglycoside nucleotidyltransferase gene in E. faecalis and Streptococcus oralis."
ODIWGS38	ARO:3000190	5086	tet(O)	AAA23033.2	M18896.2	tetracycline-resistant ribosomal protection protein	tetracycline antibiotic	antibiotic target protection	OD4	Mucosa	AscendingColon	"Tet(O) is a ribosomal protection protein. It is associated with conjugative plasmids."
ODIWGS38	ARO:3004583	14	Kpne_KpnF	BAH63252.1	AP006725.1	small multidrug resistance (SMR) antibiotic efflux pump	aminoglycoside antibiotic;cephalosporin;disinfecting agents and antiseptics;macrolide antibiotic;peptide antibiotic;rifamycin antibiotic;tetracycline antibiotic	antibiotic efflux	OD4	Mucosa	AscendingColon	"KpnF subunit of KpnEF resembles EbrAB from E. coli. Mutation in KpnEF resulted in increased susceptibility to cefepime, ceftriaxon, colistin, erythromycin, rifampin, tetracycline, and streptomycin as well as enhanced sensitivity toward sodium dodecyl sulfate, deoxycholate, dyes, benzalkonium chloride, chlorhexidine, and triclosan."
ODIWGS38	ARO:3000499	30	AcrE	AAC76297.1	U00096.1	resistance-nodulation-cell division (RND) antibiotic efflux pump	cephalosporin;cephamycin;fluoroquinolone antibiotic;penam	antibiotic efflux	OD4	Mucosa	AscendingColon	"AcrE is a membrane fusion protein, similar to AcrA."
ODIWGS38	ARO:3002875	1995	dfrE	EOD99669.1	AIIS01000002.1	trimethoprim resistant dihydrofolate reductase dfr	diaminopyrimidine antibiotic	antibiotic target replacement	OD4	Mucosa	AscendingColon	"dfrE is a chromosome-encoded dihydrofolate reductase found in Enterococcus faecalis."
ODIWGS38	ARO:3002647	873	APH(3')-IIIa	AGV10830.1	CP004067.1	APH(3')	aminoglycoside antibiotic	antibiotic inactivation	OD4	Mucosa	AscendingColon	"APH(3')-IIIa is a plasmid-encoded aminoglycoside phosphotransferase in S. aureus and Enterococcus spp."
ODIWGS38	ARO:3000245	85	RbpA	ADV91011.1	HQ203032.1	RbpA bacterial RNA polymerase-binding protein	rifamycin antibiotic	antibiotic target protection	OD4	Mucosa	AscendingColon	"RNA-polymerase binding protein which confers resistance to rifampin."
ODIWGS38	ARO:3000027	11	emrA	BAA16547.1	AP009048.1	major facilitator superfamily (MFS) antibiotic efflux pump	fluoroquinolone antibiotic	antibiotic efflux	OD4	Mucosa	AscendingColon	"EmrA is a membrane fusion protein, providing an efflux pathway with EmrB and TolC between the inner and outer membranes of E. coli, a Gram-negative bacterium."
ODIWGS38	ARO:3003839	12	Mrx	AAS13767.1	AY522923.1	macrolide phosphotransferase (MPH)	macrolide antibiotic	antibiotic inactivation	OD4	Mucosa	AscendingColon	"Mrx is part of the macrolide inactivation gene cluster in Aeromonas hydrophila."
ODIWGS38	ARO:3005040	414	YajC	TKW44661.1	VAOQ01003483.1	resistance-nodulation-cell division (RND) antibiotic efflux pump	cephalosporin;disinfecting agents and antiseptics;fluoroquinolone antibiotic;glycopeptide antibiotic;glycylcycline;oxazolidinone antibiotic;penam;phenicol antibiotic;rifamycin antibiotic;tetracycline antibiotic	antibiotic efflux	OD4	Mucosa	AscendingColon	"YajC interacts with the AcrAB-TolC efflux pump in a way that in uncharacterized but is shown to grant increased fitness in the presence of linezolid, rifampicin, and vancomycin."
ODIWGS38	ARO:3000829	659	baeS	BAA15934.1	AP009048.1	resistance-nodulation-cell division (RND) antibiotic efflux pump	aminocoumarin antibiotic;aminoglycoside antibiotic	antibiotic efflux	OD4	Mucosa	AscendingColon	"BaeS is a sensor kinase in the BaeSR regulatory system. While it phosphorylates BaeR to increase its activity, BaeS is not necessary for overexpressed BaeR to confer resistance."
ODIWGS38	ARO:3000375	124	ErmB	AAF86219.1	AF242872.1	Erm 23S ribosomal RNA methyltransferase	lincosamide antibiotic;macrolide antibiotic;streptogramin A antibiotic;streptogramin B antibiotic;streptogramin antibiotic	antibiotic target alteration	OD4	Mucosa	AscendingColon	"ErmB confers the MLSb phenotype. Similar to ErmC, expression of ErmB is inducible by erythromycin. The leader peptide causes attenuation of the mRNA and stabilizes the structure preventing further translation. When erythromycin is present, it binds the leader peptide causing a change in conformation allowing for the expression of ErmB."
ODIWGS39	ARO:3000186	770	tet(M)	BAB82500.1	AB039845.1	tetracycline-resistant ribosomal protection protein	tetracycline antibiotic	antibiotic target protection	OD9	Mucosa	AscendingColon	"Tet(M) is a ribosomal protection protein that confers tetracycline resistance. It is found on transposable DNA elements and its horizontal transfer between bacterial species has been documented."
ODIWGS39	ARO:3004254	10	vanV_in_vanB_cl	AAO82019.1	AE016830.1	glycopeptide resistance gene cluster;vanV	glycopeptide antibiotic	antibiotic target alteration	OD9	Mucosa	AscendingColon	"Also known as vanVB, is a vanV variant found in the vanB gene cluster. It is found in some but not all vanB operons in E. faecalis, suggesting the existence of varied gene compositions in vanB operons."
ODIWGS39	ARO:3002966	329	vanXY_in_vanC	AAF61331.1	AF162694.1	glycopeptide resistance gene cluster;vanXY	glycopeptide antibiotic	antibiotic target alteration	OD9	Mucosa	AscendingColon	"Also known as vanXYC, is a vanXY variant found in the vanC gene cluster."
ODIWGS39	ARO:3002635	28	APH(2'')-IIa	AAK63040.1	AF337947.1	APH(2'')	aminoglycoside antibiotic	antibiotic inactivation	OD9	Mucosa	AscendingColon	"APH(2'')-IIa is a chromosomal-encoded aminoglycoside phosphotransferase in E. faecium and E. coli."
ODIWGS39	ARO:3005098	22	qacL	AAZ42322.1	DQ149925.1	small multidrug resistance (SMR) antibiotic efflux pump	disinfecting agents and antiseptics	antibiotic efflux	OD9	Mucosa	AscendingColon	"A subunit of the qac multidrug efflux pump in Vibrio cholerae."
ODIWGS39	ARO:3000556	2876	tet(44)	CBH51823.1	FN594949.1	tetracycline-resistant ribosomal protection protein	tetracycline antibiotic	antibiotic target protection	OD9	Mucosa	AscendingColon	"Tet44 is a tetracycline resistance gene found in Campylobacter fetus, and binds to the ribosome to confer antibiotic resistance as a ribosomal protection protein."
ODIWGS39	ARO:3007120	66	tet(O/M/O)	AAR29485.1	AY394560.1	tetracycline-resistant ribosomal protection protein	tetracycline antibiotic	antibiotic target protection	OD9	Mucosa	AscendingColon	"Tet(O/M/O) is a mosaic tetracycline resistance gene and ribosomal protection protein."
ODIWGS39	ARO:3004442	122	tet(W/N/W)	AMP42147.1	KU736867.1	tetracycline-resistant ribosomal protection protein	tetracycline antibiotic	antibiotic target protection	OD9	Mucosa	AscendingColon	"tet(W/N/W) is a mosaic tetracycline resistance gene and ribosomal protection protein."
ODIWGS39	ARO:3003954	600	efmA	BAG75524.1	AB467372.1	major facilitator superfamily (MFS) antibiotic efflux pump	fluoroquinolone antibiotic;macrolide antibiotic	antibiotic efflux	OD9	Mucosa	AscendingColon	"efmA is an MFS transporter permease in E. faecium."
ODIWGS39	ARO:3000194	822	tet(W)	CAA10975.1	AJ222769.3	tetracycline-resistant ribosomal protection protein	tetracycline antibiotic	antibiotic target protection	OD9	Mucosa	AscendingColon	"Tet(W) is a ribosomal protection protein. It is associated with both conjugative and non conjugative DNA and has been found strains of Clostridioides difficile."
ODIWGS39	ARO:3007050	458	mreA	AAB64408.1	U92073.1	major facilitator superfamily (MFS) antibiotic efflux pump	macrolide antibiotic	antibiotic efflux	OD9	Mucosa	AscendingColon	"mreA is a macrolide efflux pump."
ODIWGS39	ARO:3002819	1093	msrC	AAK01167.1	AF313494.1	msr-type ABC-F protein	macrolide antibiotic;streptogramin B antibiotic;streptogramin antibiotic	antibiotic target protection	OD9	Mucosa	AscendingColon	"msrC is a chromosomal-encoded ABC-F subfamily protein expressed in Enterococcus faecium that confers resistance to erythromycin and other macrolide and streptogramin B antibiotics."
ODIWGS39	ARO:3002837	76	lnuC	AAY32951.1	AY928180.1	lincosamide nucleotidyltransferase (LNU)	lincosamide antibiotic	antibiotic inactivation	OD9	Mucosa	AscendingColon	"lnuC is a transposon-mediated nucleotidyltransferase found in Streptococcus agalactiae."
ODIWGS39	ARO:3000768	14	abeS	ACJ59254.1	CP001172.1	small multidrug resistance (SMR) antibiotic efflux pump	aminocoumarin antibiotic;macrolide antibiotic	antibiotic efflux	OD9	Mucosa	AscendingColon	"AbeS in an efflux pump of the SMR family of transporters found in Acinetobacter baumannii."
ODIWGS39	ARO:3002867	206	dfrF	AAD01868.1	AF028812.1	trimethoprim resistant dihydrofolate reductase dfr	diaminopyrimidine antibiotic	antibiotic target replacement	OD9	Mucosa	AscendingColon	"dfrF is a chromosome-encoded dihydrofolate reductase found in Streptococcus pyogenes."
ODIWGS39	ARO:3007121	240	tet(O/W)	AAR29969.1	AY485122.1	tetracycline-resistant ribosomal protection protein	tetracycline antibiotic	antibiotic target protection	OD9	Mucosa	AscendingColon	"Tet(O/W) is a mosaic tetracycline resistance gene and ribosomal protection protein."
ODIWGS39	ARO:3004480	16496	Bado_rpoB_RIF	WP_041777404.1	NC_008618.1	rifamycin-resistant beta-subunit of RNA polymerase (rpoB)	peptide antibiotic;rifamycin antibiotic	antibiotic target alteration;antibiotic target replacement	OD9	Mucosa	AscendingColon	"Bifidobacterium are antibiotic resistant probiotics are prescribed to upkeep the population beneficial bacteria in the gut microbiome. However, horizontal gene transfer among gut microbes could create harmful antibiotic-resistant pathogenic bacteria, such as Mycobacterium tuberculosis. Lokesh et al. analyzed Bifidobacterium antitubercular drug resistance and mutations in rpoB. They found that B.…
ODIWGS39	ARO:3000196	1797	tet(32)	ACH87088.1	EU722333.1	tetracycline-resistant ribosomal protection protein	tetracycline antibiotic	antibiotic target protection	OD9	Mucosa	AscendingColon	"Tet(32) is a tetracycline resistance gene similar to Tet(O), and binds to the ribosome to confer tetracycline resistance as a ribosomal protection protein."
ODIWGS39	ARO:3004253	376	vanU_in_vanG_cl	ABA71726.1	DQ212986.1	glycopeptide resistance gene cluster;vanU	glycopeptide antibiotic	antibiotic target alteration	OD9	Mucosa	AscendingColon	"Also known as vanUG, is a vanG variant found in the vanG gene cluster."
ODIWGS39	ARO:3002897	35	SAT-4	AAB53445.1	U01945.1	streptothricin acetyltransferase (SAT)	nucleoside antibiotic	antibiotic inactivation	OD9	Mucosa	AscendingColon	"SAT-4 is a plasmid-mediated streptothricin acetyltransferase and streptothricin (a nucleoside antibiotic) resistant determinant. Originally described from a Campylobacter coli BE/G4 plasmid gene sequence by Jacob et al, 1994."
ODIWGS39	ARO:3002922	1477	vanR_in_vanC_cl	AAF86641.1	AF162694.1	glycopeptide resistance gene cluster;vanR	glycopeptide antibiotic	antibiotic target alteration	OD9	Mucosa	AscendingColon	"Also known as vanRC, is a vanR variant found in the vanC gene cluster."
ODIWGS39	ARO:3007122	240	tet(O/W/32/O)	ABF69686.1	DQ525023.1	tetracycline-resistant ribosomal protection protein	tetracycline antibiotic	antibiotic target protection	OD9	Mucosa	AscendingColon	"Tet(O/W/32/O) is a mosaic tetracycline resistance gene and ribosomal protection protein."
ODIWGS39	ARO:3004039	28	Ecol_emrE	CAA77936.1	Z11877.1	small multidrug resistance (SMR) antibiotic efflux pump	macrolide antibiotic	antibiotic efflux	OD9	Mucosa	AscendingColon	"Member of the small MDR (multidrug resistance) family of transporters; in Escherichia coli this protein provides resistance against a number of positively charged compounds including ethidium bromide and erythromycin; proton-dependent secondary transporter which exchanges protons for compound translocation."
ODIWGS39	ARO:3002556	16	AAC(6')-Ii	AAB63533.1	L12710.1	AAC(6')	aminoglycoside antibiotic	antibiotic inactivation	OD9	Mucosa	AscendingColon	"AAC(6')-Ii is a chromosomal-encoded aminoglycoside acetyltransferase in Enterococcus spp."
ODIWGS39	ARO:3002628	13	aad(6)	AAU10334.1	AY712687.1	ANT(6)	aminoglycoside antibiotic	antibiotic inactivation	OD9	Mucosa	AscendingColon	"ANT(6)-Ia/aad(6) is a plasmid-encoded aminoglycoside nucleotidyltransferase gene in E. faecalis and Streptococcus oralis."
ODIWGS39	ARO:3000190	893	tet(O)	AAA23033.2	M18896.2	tetracycline-resistant ribosomal protection protein	tetracycline antibiotic	antibiotic target protection	OD9	Mucosa	AscendingColon	"Tet(O) is a ribosomal protection protein. It is associated with conjugative plasmids."
ODIWGS39	ARO:3003774	399	Saga_mprF	AAN00989.1	AE009948.1	defensin resistant mprF	peptide antibiotic	antibiotic target alteration	OD9	Mucosa	AscendingColon	"MprF is a integral membrane protein that modifies the negatively-charged phosphatidylglycerol on the membrane surface. This confers resistance to cationic peptides that disrupt the cell membrane, including defensins."
ODIWGS39	ARO:3002970	398	vanT_in_vanC_cl	AAD22403.1	AF162694.1	glycopeptide resistance gene cluster;vanT	glycopeptide antibiotic	antibiotic target alteration	OD9	Mucosa	AscendingColon	"Also known as vanTC, is a vanT variant found in the vanC gene cluster."
ODIWGS39	ARO:3000368	182	vanC	AAA24786.1	AF162694.1	Van ligase;glycopeptide resistance gene cluster	glycopeptide antibiotic	antibiotic target alteration	OD9	Mucosa	AscendingColon	"VanC is a D-Ala-D-Ala ligase homolog that synthesizes D-Ala-D-Ser, an alternative substrate for peptidoglycan synthesis that reduces vancomycin binding affinity. It is specific to Enterococcus gallinarum and E. casseliflavus, providing intrinsic resistance."
ODIWGS39	ARO:3002647	49	APH(3')-IIIa	AGV10830.1	CP004067.1	APH(3')	aminoglycoside antibiotic	antibiotic inactivation	OD9	Mucosa	AscendingColon	"APH(3')-IIIa is a plasmid-encoded aminoglycoside phosphotransferase in S. aureus and Enterococcus spp."
ODIWGS39	ARO:3002933	627	vanS_in_vanC_cl	AAF86642.1	AF162694.1	glycopeptide resistance gene cluster;vanS	glycopeptide antibiotic	antibiotic target alteration	OD9	Mucosa	AscendingColon	"Also known as vanSC, is a vanS variant found in the vanC gene cluster."
ODIWGS39	ARO:3003905	28	ANT(4')-Ib	ADA62098.1	GQ900432.1	ANT(4')	aminoglycoside antibiotic	antibiotic inactivation	OD9	Mucosa	AscendingColon	"Aminoglycoside nucleotidyltransferase sequence from Staphylococcus aureus plasmid."
ODIWGS39	ARO:3007119	298	tet(O/32/O)	CAC41371.2	AJ295238.3	tetracycline-resistant ribosomal protection protein	tetracycline antibiotic	antibiotic target protection	OD9	Mucosa	AscendingColon	"Tet(O/32/O) is a mosaic tetracycline resistance gene and ribosomal protection protein."
ODIWGS39	ARO:3000375	106	ErmB	AAF86219.1	AF242872.1	Erm 23S ribosomal RNA methyltransferase	lincosamide antibiotic;macrolide antibiotic;streptogramin A antibiotic;streptogramin B antibiotic;streptogramin antibiotic	antibiotic target alteration	OD9	Mucosa	AscendingColon	"ErmB confers the MLSb phenotype. Similar to ErmC, expression of ErmB is inducible by erythromycin. The leader peptide causes attenuation of the mRNA and stabilizes the structure preventing further translation. When erythromycin is present, it binds the leader peptide causing a change in conformation allowing for the expression of ErmB."
ODIWGS40	ARO:3000190	19	tet(O)	AAA23033.2	M18896.2	tetracycline-resistant ribosomal protection protein	tetracycline antibiotic	antibiotic target protection	OD3	Mucosa	Duodenum	"Tet(O) is a ribosomal protection protein. It is associated with conjugative plasmids."
ODIWGS40	ARO:3004480	79	Bado_rpoB_RIF	WP_041777404.1	NC_008618.1	rifamycin-resistant beta-subunit of RNA polymerase (rpoB)	peptide antibiotic;rifamycin antibiotic	antibiotic target alteration;antibiotic target replacement	OD3	Mucosa	Duodenum	"Bifidobacterium are antibiotic resistant probiotics are prescribed to upkeep the population beneficial bacteria in the gut microbiome. However, horizontal gene transfer among gut microbes could create harmful antibiotic-resistant pathogenic bacteria, such as Mycobacterium tuberculosis. Lokesh et al. analyzed Bifidobacterium antitubercular drug resistance and mutations in rpoB. They found that B.…
ODIWGS40	ARO:3000191	31	tet(Q)	CAA79727.1	Z21523.1	tetracycline-resistant ribosomal protection protein	tetracycline antibiotic	antibiotic target protection	OD3	Mucosa	Duodenum	"Tet(Q) is a ribosomal protection protein. Its gene is associated with a conjugative transposon and has been found in both Gram-positive and Gram-negative bacteria."
ODIWGS40	ARO:3005009	20	qacE	AEH26330.1	HQ730118.1	major facilitator superfamily (MFS) antibiotic efflux pump	disinfecting agents and antiseptics	antibiotic efflux	OD3	Mucosa	Duodenum	"QacE is a resistance gene conferring resistance to antiseptics."
ODIWGS41	ARO:3000988	5696	TEM-126	AAT45742.1	AY628199.1	TEM beta-lactamase	cephalosporin;monobactam;penam;penem	antibiotic inactivation	OD2	Mucosa	Jejunum	"TEM-126 is an extended-spectrum beta-lactamase found in E. coli."
ODIWGS41	ARO:3006878	30	EC-18	WP_063860256.1	NG_049083.1	EC beta-lactamase	cephalosporin	antibiotic inactivation	OD2	Mucosa	Jejunum	"EC-18 is a EC beta-lactamase."
ODIWGS41	ARO:3003549	10232	mdtO	BAE78083.1	AP009048.1	major facilitator superfamily (MFS) antibiotic efflux pump	disinfecting agents and antiseptics;nucleoside antibiotic	antibiotic efflux	OD2	Mucosa	Jejunum	"Multidrug resistance efflux pump. Could be involved in resistance to puromycin, acriflavine and tetraphenylarsonium chloride."
ODIWGS41	ARO:3005009	232	qacE	AEH26330.1	HQ730118.1	major facilitator superfamily (MFS) antibiotic efflux pump	disinfecting agents and antiseptics	antibiotic efflux	OD2	Mucosa	Jejunum	"QacE is a resistance gene conferring resistance to antiseptics."
ODIWGS41	ARO:3000793	3522	mdtB	AAC75136.1	U00096.1	resistance-nodulation-cell division (RND) antibiotic efflux pump	aminocoumarin antibiotic	antibiotic efflux	OD2	Mucosa	Jejunum	"MdtB is a transporter that forms a heteromultimer complex with MdtC to form a multidrug transporter. MdtBC is part of the MdtABC-TolC efflux complex."
ODIWGS41	ARO:3004580	276	Kpne_KpnE	BAH63251.1	AP006725.1	small multidrug resistance (SMR) antibiotic efflux pump	aminoglycoside antibiotic;cephalosporin;disinfecting agents and antiseptics;macrolide antibiotic;peptide antibiotic;rifamycin antibiotic;tetracycline antibiotic	antibiotic efflux	OD2	Mucosa	Jejunum	"KpnE subunit of KpnEF resembles EbrAB from E. coli. Mutation in KpnEF resulted in increased susceptibility to cefepime, ceftriaxon, colistin, erythromycin, rifampin, tetracycline, and streptomycin as well as enhanced sensitivity toward sodium dodecyl sulfate, deoxycholate, dyes, benzalkonium chloride, chlorhexidine, and triclosan."
ODIWGS41	ARO:3000074	1402	emrB	AAC75733.1	U00096.1	major facilitator superfamily (MFS) antibiotic efflux pump	fluoroquinolone antibiotic	antibiotic efflux	OD2	Mucosa	Jejunum	"emrB is a translocase in the emrB -TolC efflux protein in E. coli. It recognizes substrates including carbonyl cyanide m-chlorophenylhydrazone (CCCP), nalidixic acid, and thioloactomycin."
ODIWGS41	ARO:3000237	6266	TolC	ACN32294.1	FJ768952.1	ATP-binding cassette (ABC) antibiotic efflux pump;major facilitator superfamily (MFS) antibiotic efflux pump;resistance-nodulation-cell division (RND) antibiotic efflux pump	aminocoumarin antibiotic;aminoglycoside antibiotic;carbapenem;cephalosporin;cephamycin;disinfecting agents and antiseptics;fluoroquinolone antibiotic;glycylcycline;macrolide antibiotic;penam;penem;peptide antibiotic;phenicol antibiotic;rifamycin antibiotic;tetracycline antibiotic	antibiotic efflux	OD2	Mucosa	Jejunum	"TolC is a protein subunit of many multidrug efflux complexes in Gram negative bacteria. It is an outer membrane efflux protein and is constitutively open. Regulation of efflux activity is often at its periplasmic entrance by other components of the efflux complex."
ODIWGS41	ARO:3000794	3693	mdtC	AAC75137.1	U00096.1	resistance-nodulation-cell division (RND) antibiotic efflux pump	aminocoumarin antibiotic	antibiotic efflux	OD2	Mucosa	Jejunum	"MdtC is a transporter that forms a heteromultimer complex with MdtB to form a multidrug transporter. MdtBC is part of the MdtABC-TolC efflux complex. In the absence of MdtB, MdtC can form a homomultimer complex that results in a functioning efflux complex with a narrower drug specificity. mdtC corresponds to 3 loci in Pseudomonas aeruginosa PAO1 (gene name
ODIWGS41	ARO:3007015	31	qacG	WP_015740450.1	NG_051904.1	small multidrug resistance (SMR) antibiotic efflux pump	disinfecting agents and antiseptics	antibiotic efflux	OD2	Mucosa	Jejunum	"qacG is a small multidrug resistance efflux pump that confers resistance to benzalkonium chloride and ethidium bromide."
ODIWGS41	ARO:3000795	1970	mdtE	BAE77781.1	AP009048.1	resistance-nodulation-cell division (RND) antibiotic efflux pump	fluoroquinolone antibiotic;macrolide antibiotic;penam	antibiotic efflux	OD2	Mucosa	Jejunum	"MdtE is the membrane fusion protein of the MdtEF multidrug efflux complex. It shares 70% sequence similarity with AcrA."
ODIWGS41	ARO:3000263	850	marA	BAA15221.2	AP009048.1	General Bacterial Porin with reduced permeability to beta-lactams;resistance-nodulation-cell division (RND) antibiotic efflux pump	carbapenem;cephalosporin;cephamycin;disinfecting agents and antiseptics;fluoroquinolone antibiotic;glycylcycline;monobactam;penam;penem;phenicol antibiotic;rifamycin antibiotic;tetracycline antibiotic	antibiotic efflux;reduced permeability to antibiotic	OD2	Mucosa	Jejunum	"In the presence of antibiotic stress, E. coli overexpresses the global activator protein MarA, which besides inducing MDR efflux pump AcrAB, also down- regulates synthesis of the porin OmpF."
ODIWGS41	ARO:3005098	103	qacL	AAZ42322.1	DQ149925.1	small multidrug resistance (SMR) antibiotic efflux pump	disinfecting agents and antiseptics	antibiotic efflux	OD2	Mucosa	Jejunum	"A subunit of the qac multidrug efflux pump in Vibrio cholerae."
ODIWGS41	ARO:3000796	3005	mdtF	AAC76539.1	U00096.1	resistance-nodulation-cell division (RND) antibiotic efflux pump	fluoroquinolone antibiotic;macrolide antibiotic;penam	antibiotic efflux	OD2	Mucosa	Jejunum	"MdtF is the multidrug inner membrane transporter for the MdtEF-TolC efflux complex."
ODIWGS41	ARO:3000830	5851	cpxA	BAB38260.1	BA000007.3	resistance-nodulation-cell division (RND) antibiotic efflux pump	aminocoumarin antibiotic;aminoglycoside antibiotic	antibiotic efflux	OD2	Mucosa	Jejunum	"CpxA is a membrane-localized sensor kinase that is activated by envelope stress. It starts a kinase cascade that activates CpxR, which promotes efflux complex expression."
ODIWGS41	ARO:3003577	1638	ugd	AAC75089.1	U00096.1	pmr phosphoethanolamine transferase	peptide antibiotic	antibiotic target alteration	OD2	Mucosa	Jejunum	"PmrE is required for the synthesis and transfer of 4-amino-4-deoxy-L-arabinose (Ara4N) to Lipid A, which allows gram-negative bacteria to resist the antimicrobial activity of cationic antimicrobial peptides and antibiotics such as polymyxin."
ODIWGS41	ARO:3000194	69	tet(W)	CAA10975.1	AJ222769.3	tetracycline-resistant ribosomal protection protein	tetracycline antibiotic	antibiotic target protection	OD2	Mucosa	Jejunum	"Tet(W) is a ribosomal protection protein. It is associated with both conjugative and non conjugative DNA and has been found strains of Clostridioides difficile."
ODIWGS41	ARO:3003950	5759	msbA	AAC74000.1	U00096.3	ATP-binding cassette (ABC) antibiotic efflux pump	nitroimidazole antibiotic	antibiotic efflux	OD2	Mucosa	Jejunum	"MsbA is a multidrug resistance transporter homolog from E. coli and belongs to a superfamily of transporters that contain an adenosine triphosphate (ATP) binding cassette (ABC) which is also called a nucleotide-binding domain (NBD). MsbA is a member of the MDR-ABC transporter group by sequence homology. MsbA transports lipid A, a major component of the bacterial outer cell membrane, and is the o…
ODIWGS41	ARO:3001328	2019	Ecol_mdfA	AFH35853.1	JQ394987.1	major facilitator superfamily (MFS) antibiotic efflux pump	disinfecting agents and antiseptics;tetracycline antibiotic	antibiotic efflux	OD2	Mucosa	Jejunum	"Multidrug efflux pump in E. coli. This multidrug efflux system was originally identified as the Cmr/CmlA chloramphenicol exporter."
ODIWGS41	ARO:3000491	2773	acrD	BAA16344.1	AP009048.1	resistance-nodulation-cell division (RND) antibiotic efflux pump	aminoglycoside antibiotic	antibiotic efflux	OD2	Mucosa	Jejunum	"AcrD is an aminoglycoside efflux pump expressed in E. coli. Its expression can be induced by indole, and is regulated by baeRS and cpxAR."
ODIWGS41	ARO:3002578	1042	AAC(6')-Ib7	AKN19287.1	KR091911.1	AAC(6')	aminoglycoside antibiotic	antibiotic inactivation	OD2	Mucosa	Jejunum	"AAC(6')-Ib7 is a plasmid-encoded aminoglycoside acetyltransferase in E. cloacae and C. freundii."
ODIWGS41	ARO:3003841	1381	kdpE	AAC73788.1	U00096.3	kdpDE	aminoglycoside antibiotic	antibiotic efflux	OD2	Mucosa	Jejunum	"kdpE is a transcriptional activator that is part of the two-component system KdpD/KdpE that is studied for its regulatory role in potassium transport and has been identified as an adaptive regulator involved in the virulence and intracellular survival of pathogenic bacteria. kdpE regulates a range of virulence loci through direct promoter binding."
ODIWGS41	ARO:3003576	3415	eptA	BAE78116.1	AP009048.1	pmr phosphoethanolamine transferase	peptide antibiotic	antibiotic target alteration	OD2	Mucosa	Jejunum	"PmrC mediates the modification of Lipid A by the addition of 4-amino-4-deoxy-L-arabinose (L-Ara4N) and phosphoethanolamine, resulting in a less negative cell membrane and decreased binding of polymyxin B."
ODIWGS41	ARO:3004038	23	Paer_emrE	AAG08375.1	AE004091.2	small multidrug resistance (SMR) antibiotic efflux pump	aminoglycoside antibiotic	antibiotic efflux	OD2	Mucosa	Jejunum	"EmrE is a small multidrug transporter that functions as a homodimer and that couples the efflux of small polyaromatic cations from the cell with the import of protons down an electrochemical gradient. Confers resistance to tetraphenylphosphonium, methyl viologen, gentamicin, kanamycin, and neomycin."
ODIWGS41	ARO:3000412	3861	sul2	AAL59753.1	AY055428.1	sulfonamide resistant sul	sulfonamide antibiotic;sulfone antibiotic	antibiotic target replacement	OD2	Mucosa	Jejunum	"Sul2 is a sulfonamide resistant dihydropteroate synthase of Gram-negative bacteria, usually found on small plasmids."
ODIWGS41	ARO:3000768	57	abeS	ACJ59254.1	CP001172.1	small multidrug resistance (SMR) antibiotic efflux pump	aminocoumarin antibiotic;macrolide antibiotic	antibiotic efflux	OD2	Mucosa	Jejunum	"AbeS in an efflux pump of the SMR family of transporters found in Acinetobacter baumannii."
ODIWGS41	ARO:3000828	1928	baeR	BAA15935.1	AP009048.1	resistance-nodulation-cell division (RND) antibiotic efflux pump	aminocoumarin antibiotic;aminoglycoside antibiotic	antibiotic efflux	OD2	Mucosa	Jejunum	"BaeR is a response regulator that promotes the expression of MdtABC and AcrD efflux complexes."
ODIWGS41	ARO:3000502	2001	AcrF	AAC76298.1	U00096.1	resistance-nodulation-cell division (RND) antibiotic efflux pump	cephalosporin;cephamycin;fluoroquinolone antibiotic;penam	antibiotic efflux	OD2	Mucosa	Jejunum	"AcrF is a inner membrane transporter, similar to AcrB."
ODIWGS41	ARO:3000518	2409	CRP	BAE77933.1	AP009048.1	resistance-nodulation-cell division (RND) antibiotic efflux pump	fluoroquinolone antibiotic;macrolide antibiotic;penam	antibiotic efflux	OD2	Mucosa	Jejunum	"CRP is a global regulator that represses MdtEF multidrug efflux pump expression."
ODIWGS41	ARO:3000195	178	tetB(P)	AAA20117.1	L20800.1	tetracycline-resistant ribosomal protection protein	tetracycline antibiotic	antibiotic target protection	OD2	Mucosa	Jejunum	"TetB(P) is a tetracycline ribosomal protection protein found on the same operon as tetA(P), a tetracycline efflux protein."
ODIWGS41	ARO:3000254	2903	emrY	BAA11237.1	D78168.1	major facilitator superfamily (MFS) antibiotic efflux pump	tetracycline antibiotic	antibiotic efflux	OD2	Mucosa	Jejunum	"emrY is a multidrug transport that moves substrates across the inner membrane of the Gram-negative E. coli. It is a homolog of emrB."
ODIWGS41	ARO:3000656	755	AcrS	AAC76296.1	U00096.1	resistance-nodulation-cell division (RND) antibiotic efflux pump	cephalosporin;cephamycin;disinfecting agents and antiseptics;fluoroquinolone antibiotic;glycylcycline;penam;phenicol antibiotic;rifamycin antibiotic;tetracycline antibiotic	antibiotic efflux	OD2	Mucosa	Jejunum	"AcrS is a repressor of the AcrAB efflux complex and is associated with the expression of AcrEF. AcrS is believed to regulate a switch between AcrAB and AcrEF efflux."
ODIWGS41	ARO:3002660	9423	APH(6)-Id	AAC23556.1	AF024602.1	APH(6)	aminoglycoside antibiotic	antibiotic inactivation	OD2	Mucosa	Jejunum	"APH(6)-Id is an aminoglycoside phosphotransferase encoded by plasmids, integrative conjugative elements and chromosomal genomic islands in K. pneumoniae, Salmonella spp., E. coli, Shigella flexneri, Providencia alcalifaciens, Pseudomonas spp., V. cholerae, Edwardsiella tarda, Pasteurella multocida and Aeromonas bestiarum."
ODIWGS41	ARO:3001329	2602	mdtG	ABV18113.1	CP000800.1	major facilitator superfamily (MFS) antibiotic efflux pump	phosphonic acid antibiotic	antibiotic efflux	OD2	Mucosa	Jejunum	"The MdtG protein, also named YceE, appears to be a member of the major facilitator superfamily of transporters, and it has been reported, when overexpressed, to increase fosfomycin and deoxycholate resistances. mdtG is a member of the marA-soxS-rob regulon."
ODIWGS41	ARO:3000832	1287	evgA	BAB36671.1	BA000007.3	major facilitator superfamily (MFS) antibiotic efflux pump;resistance-nodulation-cell division (RND) antibiotic efflux pump	fluoroquinolone antibiotic;macrolide antibiotic;penam;tetracycline antibiotic	antibiotic efflux	OD2	Mucosa	Jejunum	"EvgA, when phosphorylated, is a positive regulator for efflux protein complexes emrKY and mdtEF. While usually phosphorylated in a EvgS dependent manner, it can be phosphorylated in the absence of EvgS when overexpressed."
ODIWGS41	ARO:3004043	756	Ecol_acrA	AAC73565.1	U00096.3	resistance-nodulation-cell division (RND) antibiotic efflux pump	cephalosporin;disinfecting agents and antiseptics;fluoroquinolone antibiotic;glycylcycline;penam;phenicol antibiotic;rifamycin antibiotic;tetracycline antibiotic	antibiotic efflux	OD2	Mucosa	Jejunum	"AcrA is a subunit of the AcrAB-TolC multidrug efflux system that in E. coli."
ODIWGS41	ARO:3003548	4525	mdtN	BAE78084.1	AP009048.1	major facilitator superfamily (MFS) antibiotic efflux pump	disinfecting agents and antiseptics;nucleoside antibiotic	antibiotic efflux	OD2	Mucosa	Jejunum	"Multidrug resistance efflux pump. Could be involved in resistance to puromycin, acriflavine and tetraphenylarsonium chloride."
ODIWGS41	ARO:3003843	2004	leuO	VWQ00850.1	LR730402.1	major facilitator superfamily (MFS) antibiotic efflux pump	disinfecting agents and antiseptics;nucleoside antibiotic	antibiotic efflux	OD2	Mucosa	Jejunum	"leuO, a LysR family transcription factor, exists in a wide variety of bacteria of the family Enterobacteriaceae and is involved in the regulation of as yet unidentified genes affecting the stress response and pathogenesis expression. LeuO is also an activator of the MdtNOP efflux pump."
ODIWGS41	ARO:3000833	7608	evgS	AAC75429.1	U00096.1	major facilitator superfamily (MFS) antibiotic efflux pump;resistance-nodulation-cell division (RND) antibiotic efflux pump	fluoroquinolone antibiotic;macrolide antibiotic;penam;tetracycline antibiotic	antibiotic efflux	OD2	Mucosa	Jejunum	"EvgS is a sensor protein that phosphorylates the regulatory protein EvgA. evgS corresponds to 1 locus in Pseudomonas aeruginosa PAO1 and 1 locus in Pseudomonas aeruginosa LESB58."
ODIWGS41	ARO:3003578	2875	PmrF	AAC75314.1	U00096.1	pmr phosphoethanolamine transferase	peptide antibiotic	antibiotic target alteration	OD2	Mucosa	Jejunum	"PmrF is required for the synthesis and transfer of 4-amino-4-deoxy-L-arabinose (Ara4N) to Lipid A, which allows gram-negative bacteria to resist the antimicrobial activity of cationic antimicrobial peptides and antibiotics such as polymyxin. pmrF corresponds to 1 locus in Pseudomonas aeruginosa PAO1 and 1 locus in Pseudomonas aeruginosa LESB58."
ODIWGS41	ARO:3000516	1102	emrR	AAC75731.1	U00096.3	major facilitator superfamily (MFS) antibiotic efflux pump	fluoroquinolone antibiotic	antibiotic efflux	OD2	Mucosa	Jejunum	"EmrR is a negative regulator for the EmrAB-TolC multidrug efflux pump in E. coli. Mutations lead to EmrAB-TolC overexpression."
ODIWGS41	ARO:3000206	2511	emrK	BAA11236.1	D78168.1	major facilitator superfamily (MFS) antibiotic efflux pump	tetracycline antibiotic	antibiotic efflux	OD2	Mucosa	Jejunum	"emrK is a membrane fusion protein that is a homolog of EmrA. Together with the inner membrane transporter EmrY and the outer membrane channel TolC, it mediates multidrug efflux."
ODIWGS41	ARO:3006874	35	EC-13	WP_063860228.1	NG_049079.1	EC beta-lactamase	cephalosporin	antibiotic inactivation	OD2	Mucosa	Jejunum	"EC-13 is a EC beta-lactamase."
ODIWGS41	ARO:3003063	131	ykkC	CAB13166.1	AL009126.1	small multidrug resistance (SMR) antibiotic efflux pump	aminoglycoside antibiotic;phenicol antibiotic;tetracycline antibiotic	antibiotic efflux	OD2	Mucosa	Jejunum	"ykkC is an SMR-type protein that is a subunit of the ykkCD efflux pump."
ODIWGS41	ARO:3004290	37	Ecol_ampC_BLA	AAC77110.1	U00096.3	ampC-type beta-lactamase	cephalosporin;penam	antibiotic inactivation	OD2	Mucosa	Jejunum	"A class C ampC beta-lactamase (cephalosporinase) enzyme described in Escherichia coli shown clinically to confer resistance to penicillin-like and cephalosporin-class antibiotics."
ODIWGS41	ARO:3002639	6033	APH(3'')-Ib	ABK33456.1	AF313472.2	APH(3'')	aminoglycoside antibiotic	antibiotic inactivation	OD2	Mucosa	Jejunum	"APH(3'')-Ib is an aminoglycoside phosphotransferase encoded by plasmids, transposons, integrative conjugative elements and chromosomes in Enterobacteriaceae and Pseudomonas spp."
ODIWGS41	ARO:3003550	7655	mdtP	BAE78082.1	AP009048.1	major facilitator superfamily (MFS) antibiotic efflux pump	disinfecting agents and antiseptics;nucleoside antibiotic	antibiotic efflux	OD2	Mucosa	Jejunum	"Multidrug resistance efflux pump. Could be involved in resistance to puromycin, acriflavine and tetraphenylarsonium chloride."
ODIWGS41	ARO:3003952	4037	YojI	AAC75271.1	U00096.3	ATP-binding cassette (ABC) antibiotic efflux pump	peptide antibiotic	antibiotic efflux	OD2	Mucosa	Jejunum	"YojI mediates resistance to the peptide antibiotic microcin J25 when it is expressed from a multicopy vector. YojI is capable of pumping out microcin molecules. The outer membrane protein TolC in addition to YojI is required for export of microcin J25 out of the cell. Microcin J25 is thus the first known substrate for YojI."
ODIWGS41	ARO:3003836	92	qacH	CAA76544.1	Y16945.1	small multidrug resistance (SMR) antibiotic efflux pump	disinfecting agents and antiseptics	antibiotic efflux	OD2	Mucosa	Jejunum	"qacH is a subunit of the qac multidrug efflux pump in Staphylococcus saprophyticus."
ODIWGS41	ARO:3004039	98	Ecol_emrE	CAA77936.1	Z11877.1	small multidrug resistance (SMR) antibiotic efflux pump	macrolide antibiotic	antibiotic efflux	OD2	Mucosa	Jejunum	"Member of the small MDR (multidrug resistance) family of transporters; in Escherichia coli this protein provides resistance against a number of positively charged compounds including ethidium bromide and erythromycin; proton-dependent secondary transporter which exchanges protons for compound translocation."
ODIWGS41	ARO:3002986	2234	bacA	AAC76093.1	U00096.3	undecaprenyl pyrophosphate related proteins	peptide antibiotic	antibiotic target alteration	OD2	Mucosa	Jejunum	"The bacA gene product (BacA) recycles undecaprenyl pyrophosphate during cell wall biosynthesis which confers resistance to bacitracin."
ODIWGS41	ARO:3000508	2729	gadX	BAE77778.1	AP009048.1	resistance-nodulation-cell division (RND) antibiotic efflux pump	fluoroquinolone antibiotic;macrolide antibiotic;penam	antibiotic efflux	OD2	Mucosa	Jejunum	"GadX is an AraC-family regulator that promotes mdtEF expression to confer multidrug resistance."
ODIWGS41	ARO:3003064	30	ykkD	CAB13167.1	AL009126.1	small multidrug resistance (SMR) antibiotic efflux pump	aminoglycoside antibiotic;phenicol antibiotic;tetracycline antibiotic	antibiotic efflux	OD2	Mucosa	Jejunum	"ykkD is an SMR-type protein that is a subunit of the ykkCD efflux pump."
ODIWGS41	ARO:3000216	1449	acrB	AAC73564.1	U00096.3	resistance-nodulation-cell division (RND) antibiotic efflux pump	cephalosporin;disinfecting agents and antiseptics;fluoroquinolone antibiotic;glycylcycline;penam;phenicol antibiotic;rifamycin antibiotic;tetracycline antibiotic	antibiotic efflux	OD2	Mucosa	Jejunum	"Protein subunit of AcrA-AcrB-TolC multidrug efflux complex. AcrB functions as a herterotrimer which forms the inner membrane component and is primarily responsible for substrate recognition and energy transduction by acting as a drug/proton antiporter."
ODIWGS41	ARO:3005069	67	rsmA	AAC16242.1	AF061757.1	resistance-nodulation-cell division (RND) antibiotic efflux pump	diaminopyrimidine antibiotic;fluoroquinolone antibiotic;phenicol antibiotic	antibiotic efflux	OD2	Mucosa	Jejunum	"rsmA is a gene that regulates virulence of Pseudomonas aeruginosa. However, its negative effect on MexEF-OprN overexpression has been noted to confer resistance to various antibiotics. It's Escherichia coli homolog is csrA."
ODIWGS41	ARO:3000190	208	tet(O)	AAA23033.2	M18896.2	tetracycline-resistant ribosomal protection protein	tetracycline antibiotic	antibiotic target protection	OD2	Mucosa	Jejunum	"Tet(O) is a ribosomal protection protein. It is associated with conjugative plasmids."
ODIWGS41	ARO:3003838	1290	gadW	ANK04027.1	CP015085.1	resistance-nodulation-cell division (RND) antibiotic efflux pump	fluoroquinolone antibiotic;macrolide antibiotic;penam	antibiotic efflux	OD2	Mucosa	Jejunum	"GadW is an AraC-family regulator that promotes mdtEF expression to confer multidrug resistance. GadW inhibits GadX-dependent activation. GadW clearly represses gadX and, in situations where GadX is missing, activates gadA and gadBC."
ODIWGS41	ARO:3004583	486	Kpne_KpnF	BAH63252.1	AP006725.1	small multidrug resistance (SMR) antibiotic efflux pump	aminoglycoside antibiotic;cephalosporin;disinfecting agents and antiseptics;macrolide antibiotic;peptide antibiotic;rifamycin antibiotic;tetracycline antibiotic	antibiotic efflux	OD2	Mucosa	Jejunum	"KpnF subunit of KpnEF resembles EbrAB from E. coli. Mutation in KpnEF resulted in increased susceptibility to cefepime, ceftriaxon, colistin, erythromycin, rifampin, tetracycline, and streptomycin as well as enhanced sensitivity toward sodium dodecyl sulfate, deoxycholate, dyes, benzalkonium chloride, chlorhexidine, and triclosan."
ODIWGS41	ARO:3000499	979	AcrE	AAC76297.1	U00096.1	resistance-nodulation-cell division (RND) antibiotic efflux pump	cephalosporin;cephamycin;fluoroquinolone antibiotic;penam	antibiotic efflux	OD2	Mucosa	Jejunum	"AcrE is a membrane fusion protein, similar to AcrA."
ODIWGS41	ARO:3003905	46	ANT(4')-Ib	ADA62098.1	GQ900432.1	ANT(4')	aminoglycoside antibiotic	antibiotic inactivation	OD2	Mucosa	Jejunum	"Aminoglycoside nucleotidyltransferase sequence from Staphylococcus aureus plasmid."
ODIWGS41	ARO:3000027	907	emrA	BAA16547.1	AP009048.1	major facilitator superfamily (MFS) antibiotic efflux pump	fluoroquinolone antibiotic	antibiotic efflux	OD2	Mucosa	Jejunum	"EmrA is a membrane fusion protein, providing an efflux pathway with EmrB and TolC between the inner and outer membranes of E. coli, a Gram-negative bacterium."
ODIWGS41	ARO:3000316	90746	mphA	BAA03776.1	D16251.1	macrolide phosphotransferase (MPH)	macrolide antibiotic	antibiotic inactivation	OD2	Mucosa	Jejunum	"The mphA gene encodes for resistance enzyme MPH(2')-I which preferentially inactivate 14-membered macrolides (e.g.erythromycin, telithromycin, roxithromycin) over 16-membered macrolides (e.g.tylosin, spiramycin). It phosphorylates macrolides at 2'-OH hydroxyl of desosamine sugar of macrolides in a GTP-dependent manner."
ODIWGS41	ARO:3000792	2161	mdtA	AAC75135.2	U00096.1	resistance-nodulation-cell division (RND) antibiotic efflux pump	aminocoumarin antibiotic	antibiotic efflux	OD2	Mucosa	Jejunum	"MdtA is the membrane fusion protein of the multidrug efflux complex mdtABC."
ODIWGS41	ARO:3003839	168198	Mrx	AAS13767.1	AY522923.1	macrolide phosphotransferase (MPH)	macrolide antibiotic	antibiotic inactivation	OD2	Mucosa	Jejunum	"Mrx is part of the macrolide inactivation gene cluster in Aeromonas hydrophila."
ODIWGS41	ARO:3005040	217	YajC	TKW44661.1	VAOQ01003483.1	resistance-nodulation-cell division (RND) antibiotic efflux pump	cephalosporin;disinfecting agents and antiseptics;fluoroquinolone antibiotic;glycopeptide antibiotic;glycylcycline;oxazolidinone antibiotic;penam;phenicol antibiotic;rifamycin antibiotic;tetracycline antibiotic	antibiotic efflux	OD2	Mucosa	Jejunum	"YajC interacts with the AcrAB-TolC efflux pump in a way that in uncharacterized but is shown to grant increased fitness in the presence of linezolid, rifampicin, and vancomycin."
ODIWGS41	ARO:3000829	3311	baeS	BAA15934.1	AP009048.1	resistance-nodulation-cell division (RND) antibiotic efflux pump	aminocoumarin antibiotic;aminoglycoside antibiotic	antibiotic efflux	OD2	Mucosa	Jejunum	"BaeS is a sensor kinase in the BaeSR regulatory system. While it phosphorylates BaeR to increase its activity, BaeS is not necessary for overexpressed BaeR to confer resistance."
ODIWGS41	ARO:3001216	3769	mdtH	AAC74149.2	U00096.1	major facilitator superfamily (MFS) antibiotic efflux pump	fluoroquinolone antibiotic	antibiotic efflux	OD2	Mucosa	Jejunum	"Multidrug resistance protein MdtH."
ODIWGS41	ARO:3000676	761	H-NS	BAB35162.1	BA000007.3	major facilitator superfamily (MFS) antibiotic efflux pump;resistance-nodulation-cell division (RND) antibiotic efflux pump	cephalosporin;cephamycin;fluoroquinolone antibiotic;macrolide antibiotic;penam;tetracycline antibiotic	antibiotic efflux	OD2	Mucosa	Jejunum	"H-NS is a histone-like protein involved in global gene regulation in Gram-negative bacteria. It is a repressor of the membrane fusion protein genes acrE, mdtE, and emrK as well as nearby genes of many RND-type multidrug exporters."
ODIWGS41	ARO:3000166	870	tet(B)	BAC67143.1	AB089595.1	major facilitator superfamily (MFS) antibiotic efflux pump	tetracycline antibiotic	antibiotic efflux	OD2	Mucosa	Jejunum	"Tet(B) is a tetracycline efflux protein expressed in many Gram-negative bacteria. It confers resistance to tetracycline, doxycycline, and minocycline, but not tigecycline."
ODIWGS42	ARO:3002986	11	bacA	AAC76093.1	U00096.3	undecaprenyl pyrophosphate related proteins	peptide antibiotic	antibiotic target alteration	OD3	Mucosa	DescendingColon	"The bacA gene product (BacA) recycles undecaprenyl pyrophosphate during cell wall biosynthesis which confers resistance to bacitracin."
ODIWGS42	ARO:3000166	10	tet(B)	BAC67143.1	AB089595.1	major facilitator superfamily (MFS) antibiotic efflux pump	tetracycline antibiotic	antibiotic efflux	OD3	Mucosa	DescendingColon	"Tet(B) is a tetracycline efflux protein expressed in many Gram-negative bacteria. It confers resistance to tetracycline, doxycycline, and minocycline, but not tigecycline."
ODIWGS42	ARO:3000830	72	cpxA	BAB38260.1	BA000007.3	resistance-nodulation-cell division (RND) antibiotic efflux pump	aminocoumarin antibiotic;aminoglycoside antibiotic	antibiotic efflux	OD3	Mucosa	DescendingColon	"CpxA is a membrane-localized sensor kinase that is activated by envelope stress. It starts a kinase cascade that activates CpxR, which promotes efflux complex expression."
ODIWGS42	ARO:3000190	50	tet(O)	AAA23033.2	M18896.2	tetracycline-resistant ribosomal protection protein	tetracycline antibiotic	antibiotic target protection	OD3	Mucosa	DescendingColon	"Tet(O) is a ribosomal protection protein. It is associated with conjugative plasmids."
ODIWGS42	ARO:3000499	21	AcrE	AAC76297.1	U00096.1	resistance-nodulation-cell division (RND) antibiotic efflux pump	cephalosporin;cephamycin;fluoroquinolone antibiotic;penam	antibiotic efflux	OD3	Mucosa	DescendingColon	"AcrE is a membrane fusion protein, similar to AcrA."
ODIWGS42	ARO:3003549	28	mdtO	BAE78083.1	AP009048.1	major facilitator superfamily (MFS) antibiotic efflux pump	disinfecting agents and antiseptics;nucleoside antibiotic	antibiotic efflux	OD3	Mucosa	DescendingColon	"Multidrug resistance efflux pump. Could be involved in resistance to puromycin, acriflavine and tetraphenylarsonium chloride."
ODIWGS42	ARO:3000254	13	emrY	BAA11237.1	D78168.1	major facilitator superfamily (MFS) antibiotic efflux pump	tetracycline antibiotic	antibiotic efflux	OD3	Mucosa	DescendingColon	"emrY is a multidrug transport that moves substrates across the inner membrane of the Gram-negative E. coli. It is a homolog of emrB."
ODIWGS42	ARO:3000518	16	CRP	BAE77933.1	AP009048.1	resistance-nodulation-cell division (RND) antibiotic efflux pump	fluoroquinolone antibiotic;macrolide antibiotic;penam	antibiotic efflux	OD3	Mucosa	DescendingColon	"CRP is a global regulator that represses MdtEF multidrug efflux pump expression."
ODIWGS42	ARO:3000833	89	evgS	AAC75429.1	U00096.1	major facilitator superfamily (MFS) antibiotic efflux pump;resistance-nodulation-cell division (RND) antibiotic efflux pump	fluoroquinolone antibiotic;macrolide antibiotic;penam;tetracycline antibiotic	antibiotic efflux	OD3	Mucosa	DescendingColon	"EvgS is a sensor protein that phosphorylates the regulatory protein EvgA. evgS corresponds to 1 locus in Pseudomonas aeruginosa PAO1 and 1 locus in Pseudomonas aeruginosa LESB58."
ODIWGS42	ARO:3003839	353	Mrx	AAS13767.1	AY522923.1	macrolide phosphotransferase (MPH)	macrolide antibiotic	antibiotic inactivation	OD3	Mucosa	DescendingColon	"Mrx is part of the macrolide inactivation gene cluster in Aeromonas hydrophila."
ODIWGS42	ARO:3002660	16	APH(6)-Id	AAC23556.1	AF024602.1	APH(6)	aminoglycoside antibiotic	antibiotic inactivation	OD3	Mucosa	DescendingColon	"APH(6)-Id is an aminoglycoside phosphotransferase encoded by plasmids, integrative conjugative elements and chromosomal genomic islands in K. pneumoniae, Salmonella spp., E. coli, Shigella flexneri, Providencia alcalifaciens, Pseudomonas spp., V. cholerae, Edwardsiella tarda, Pasteurella multocida and Aeromonas bestiarum."
ODIWGS42	ARO:3000316	129	mphA	BAA03776.1	D16251.1	macrolide phosphotransferase (MPH)	macrolide antibiotic	antibiotic inactivation	OD3	Mucosa	DescendingColon	"The mphA gene encodes for resistance enzyme MPH(2')-I which preferentially inactivate 14-membered macrolides (e.g.erythromycin, telithromycin, roxithromycin) over 16-membered macrolides (e.g.tylosin, spiramycin). It phosphorylates macrolides at 2'-OH hydroxyl of desosamine sugar of macrolides in a GTP-dependent manner."
ODIWGS42	ARO:3003905	23	ANT(4')-Ib	ADA62098.1	GQ900432.1	ANT(4')	aminoglycoside antibiotic	antibiotic inactivation	OD3	Mucosa	DescendingColon	"Aminoglycoside nucleotidyltransferase sequence from Staphylococcus aureus plasmid."
ODIWGS42	ARO:3000796	15	mdtF	AAC76539.1	U00096.1	resistance-nodulation-cell division (RND) antibiotic efflux pump	fluoroquinolone antibiotic;macrolide antibiotic;penam	antibiotic efflux	OD3	Mucosa	DescendingColon	"MdtF is the multidrug inner membrane transporter for the MdtEF-TolC efflux complex."
ODIWGS42	ARO:3000194	14	tet(W)	CAA10975.1	AJ222769.3	tetracycline-resistant ribosomal protection protein	tetracycline antibiotic	antibiotic target protection	OD3	Mucosa	DescendingColon	"Tet(W) is a ribosomal protection protein. It is associated with both conjugative and non conjugative DNA and has been found strains of Clostridioides difficile."
ODIWGS42	ARO:3000237	13	TolC	ACN32294.1	FJ768952.1	ATP-binding cassette (ABC) antibiotic efflux pump;major facilitator superfamily (MFS) antibiotic efflux pump;resistance-nodulation-cell division (RND) antibiotic efflux pump	aminocoumarin antibiotic;aminoglycoside antibiotic;carbapenem;cephalosporin;cephamycin;disinfecting agents and antiseptics;fluoroquinolone antibiotic;glycylcycline;macrolide antibiotic;penam;penem;peptide antibiotic;phenicol antibiotic;rifamycin antibiotic;tetracycline antibiotic	antibiotic efflux	OD3	Mucosa	DescendingColon	"TolC is a protein subunit of many multidrug efflux complexes in Gram negative bacteria. It is an outer membrane efflux protein and is constitutively open. Regulation of efflux activity is often at its periplasmic entrance by other components of the efflux complex."
ODIWGS42	ARO:3004583	14	Kpne_KpnF	BAH63252.1	AP006725.1	small multidrug resistance (SMR) antibiotic efflux pump	aminoglycoside antibiotic;cephalosporin;disinfecting agents and antiseptics;macrolide antibiotic;peptide antibiotic;rifamycin antibiotic;tetracycline antibiotic	antibiotic efflux	OD3	Mucosa	DescendingColon	"KpnF subunit of KpnEF resembles EbrAB from E. coli. Mutation in KpnEF resulted in increased susceptibility to cefepime, ceftriaxon, colistin, erythromycin, rifampin, tetracycline, and streptomycin as well as enhanced sensitivity toward sodium dodecyl sulfate, deoxycholate, dyes, benzalkonium chloride, chlorhexidine, and triclosan."
ODIWGS42	ARO:3000502	24	AcrF	AAC76298.1	U00096.1	resistance-nodulation-cell division (RND) antibiotic efflux pump	cephalosporin;cephamycin;fluoroquinolone antibiotic;penam	antibiotic efflux	OD3	Mucosa	DescendingColon	"AcrF is a inner membrane transporter, similar to AcrB."
ODIWGS42	ARO:3002982	14	amrA	CAH35803.1	BX571965.1	resistance-nodulation-cell division (RND) antibiotic efflux pump	aminoglycoside antibiotic	antibiotic efflux	OD3	Mucosa	DescendingColon	"amrA is the efflux pump subunit of the AmrAB-OprM multidrug efflux complex. amrA corresponds to 1 locus in Pseudomonas aeruginosa PAO1 and 1 locus in Pseudomonas aeruginosa LESB58."
ODIWGS43	ARO:3003905	19	ANT(4')-Ib	ADA62098.1	GQ900432.1	ANT(4')	aminoglycoside antibiotic	antibiotic inactivation	OD7	Lumen	AscendingColon	"Aminoglycoside nucleotidyltransferase sequence from Staphylococcus aureus plasmid."
ODIWGS44	ARO:3000186	218	tet(M)	BAB82500.1	AB039845.1	tetracycline-resistant ribosomal protection protein	tetracycline antibiotic	antibiotic target protection	OD7	Lumen	Ileum	"Tet(M) is a ribosomal protection protein that confers tetracycline resistance. It is found on transposable DNA elements and its horizontal transfer between bacterial species has been documented."
ODIWGS44	ARO:3005009	12	qacE	AEH26330.1	HQ730118.1	major facilitator superfamily (MFS) antibiotic efflux pump	disinfecting agents and antiseptics	antibiotic efflux	OD7	Lumen	Ileum	"QacE is a resistance gene conferring resistance to antiseptics."
ODIWGS44	ARO:3002931	198	vanS_in_vanA_cl	AAA65954.1	M97297.1	glycopeptide resistance gene cluster;vanS	glycopeptide antibiotic	antibiotic target alteration	OD7	Lumen	Ileum	"Also known as vanSA, is a vanS variant found in the vanA gene cluster."
ODIWGS44	ARO:3004683	401	aadS	AAA27459.1	M72415.1	ANT(6)	aminoglycoside antibiotic	antibiotic inactivation	OD7	Lumen	Ileum	"A novel Tn4551 streptomycin-resistance gene that was phenotypically silent in wild-type Bacteroides; expression could be activated by a trans-acting chromosomal mutation."
ODIWGS44	ARO:3004595	16	erm(45)	CEJ95855.1	LN680996.1	Erm 23S ribosomal RNA methyltransferase	lincosamide antibiotic;macrolide antibiotic;streptogramin B antibiotic;streptogramin antibiotic	antibiotic target alteration	OD7	Lumen	Ileum	"Erm45 is an rRNA methylase that confers resistances to macrolide, lincosamide, and streptogramin B."
ODIWGS44	ARO:3004442	42	tet(W/N/W)	AMP42147.1	KU736867.1	tetracycline-resistant ribosomal protection protein	tetracycline antibiotic	antibiotic target protection	OD7	Lumen	Ileum	"tet(W/N/W) is a mosaic tetracycline resistance gene and ribosomal protection protein."
ODIWGS44	ARO:3000194	215	tet(W)	CAA10975.1	AJ222769.3	tetracycline-resistant ribosomal protection protein	tetracycline antibiotic	antibiotic target protection	OD7	Lumen	Ileum	"Tet(W) is a ribosomal protection protein. It is associated with both conjugative and non conjugative DNA and has been found strains of Clostridioides difficile."
ODIWGS44	ARO:3003982	1115	LlmA_23S_CLI	APB03216.1	KX531046.1	Llm 23S ribosomal RNA methyltransferase	lincosamide antibiotic	antibiotic target alteration	OD7	Lumen	Ileum	"Lincosamide (Clindamycin) resistant (putative) ribosomal methyltransferase related to the RlmK 23S rRNA methyltransferase COG family. Detected in Paenibacillus sp. LC231, an isolated strain of Paenibacillus found in Lechuguilla Cave, NM, USA. Described by Pawlowski et al. 2016."
ODIWGS44	ARO:3000565	71	tet(38)	AAV80464.1	AY825285.1	major facilitator superfamily (MFS) antibiotic efflux pump	tetracycline antibiotic	antibiotic efflux	OD7	Lumen	Ileum	"Tet38 is a tetracycline efflux pump found in the Gram-positive Staphylococcus aureus. It is regulated by mgrA, which also regulates NorB."
ODIWGS44	ARO:3000191	587	tet(Q)	CAA79727.1	Z21523.1	tetracycline-resistant ribosomal protection protein	tetracycline antibiotic	antibiotic target protection	OD7	Lumen	Ileum	"Tet(Q) is a ribosomal protection protein. Its gene is associated with a conjugative transposon and has been found in both Gram-positive and Gram-negative bacteria."
ODIWGS44	ARO:3004038	10	Paer_emrE	AAG08375.1	AE004091.2	small multidrug resistance (SMR) antibiotic efflux pump	aminoglycoside antibiotic	antibiotic efflux	OD7	Lumen	Ileum	"EmrE is a small multidrug transporter that functions as a homodimer and that couples the efflux of small polyaromatic cations from the cell with the import of protons down an electrochemical gradient. Confers resistance to tetraphenylphosphonium, methyl viologen, gentamicin, kanamycin, and neomycin."
ODIWGS44	ARO:3002867	18	dfrF	AAD01868.1	AF028812.1	trimethoprim resistant dihydrofolate reductase dfr	diaminopyrimidine antibiotic	antibiotic target replacement	OD7	Lumen	Ileum	"dfrF is a chromosome-encoded dihydrofolate reductase found in Streptococcus pyogenes."
ODIWGS44	ARO:3000195	409	tetB(P)	AAA20117.1	L20800.1	tetracycline-resistant ribosomal protection protein	tetracycline antibiotic	antibiotic target protection	OD7	Lumen	Ileum	"TetB(P) is a tetracycline ribosomal protection protein found on the same operon as tetA(P), a tetracycline efflux protein."
ODIWGS44	ARO:3000196	370	tet(32)	ACH87088.1	EU722333.1	tetracycline-resistant ribosomal protection protein	tetracycline antibiotic	antibiotic target protection	OD7	Lumen	Ileum	"Tet(32) is a tetracycline resistance gene similar to Tet(O), and binds to the ribosome to confer tetracycline resistance as a ribosomal protection protein."
ODIWGS44	ARO:3004572	195	Saur_LmrS	AAW38464.1	CP000046.1	major facilitator superfamily (MFS) antibiotic efflux pump	aminoglycoside antibiotic;diaminopyrimidine antibiotic;macrolide antibiotic;oxazolidinone antibiotic;phenicol antibiotic	antibiotic efflux	OD7	Lumen	Ileum	"MFS transporters are secondary active transporters with single-polypeptide chains containing 400-600 amino acids that transport small solutes across the membrane by using electrochemical gradients. LmrS has 14 transmembrane helices and, when expressed in E. coli, is capable of extruding a variety of antibiotics inclinding linezolid, trimethoprim, florfenicol, chlorampheniocol, erythromycin, stre…
ODIWGS44	ARO:3007112	10	nimJ	AIM40056.1	KJ816753.1	nitroimidazole reductase	nitroimidazole antibiotic	antibiotic inactivation	OD7	Lumen	Ileum	"nimJ is a nitroimidazole reductase mainly found in Bacteroides fragilis that is associated with the deactivation of nitroimidazole antibiotics such as metronidazole. Minimum inhibitory concentrations observed in isolates vary greatly depending on species, strain, and nitroimidazole treatment."
ODIWGS44	ARO:3004253	163	vanU_in_vanG_cl	ABA71726.1	DQ212986.1	glycopeptide resistance gene cluster;vanU	glycopeptide antibiotic	antibiotic target alteration	OD7	Lumen	Ileum	"Also known as vanUG, is a vanG variant found in the vanG gene cluster."
ODIWGS44	ARO:3002897	11	SAT-4	AAB53445.1	U01945.1	streptothricin acetyltransferase (SAT)	nucleoside antibiotic	antibiotic inactivation	OD7	Lumen	Ileum	"SAT-4 is a plasmid-mediated streptothricin acetyltransferase and streptothricin (a nucleoside antibiotic) resistant determinant. Originally described from a Campylobacter coli BE/G4 plasmid gene sequence by Jacob et al, 1994."
ODIWGS44	ARO:3007122	57	tet(O/W/32/O)	ABF69686.1	DQ525023.1	tetracycline-resistant ribosomal protection protein	tetracycline antibiotic	antibiotic target protection	OD7	Lumen	Ileum	"Tet(O/W/32/O) is a mosaic tetracycline resistance gene and ribosomal protection protein."
ODIWGS44	ARO:3000604	1312	Erm(35)	AAK07612.2	AF319779.2	Erm 23S ribosomal RNA methyltransferase	lincosamide antibiotic;macrolide antibiotic;streptogramin A antibiotic;streptogramin B antibiotic;streptogramin antibiotic	antibiotic target alteration	OD7	Lumen	Ileum	"ErmD confers MLSb phenotype."
ODIWGS44	ARO:3004047	475	kdpD	CYF42523.1	FHDU01000010.1	kdpDE	aminoglycoside antibiotic	antibiotic efflux	OD7	Lumen	Ileum	"kdpD is a component of the two-component regulatory system, kdpDE. This system is involved in potassium transport and homeostasis, and has been implicated in virulence factor regulation along with kdpE."
ODIWGS44	ARO:3000010	120	vanA	AAA65956.1	M97297.1	Van ligase;glycopeptide resistance gene cluster	glycopeptide antibiotic	antibiotic target alteration	OD7	Lumen	Ileum	"VanA is a D-Ala-D-Ala ligase homolog that synthesizes D-Ala-D-Lac, an alternative substrate for peptidoglycan synthesis that reduces vancomycin binding affinity. It has been isolated from VREs. It is associated with both vancomycin and teicoplanin resistance."
ODIWGS44	ARO:3005166	359	tet(X1)	CAC47933.1	AJ311171.1	tetracycline inactivation enzyme	tetracycline antibiotic	antibiotic inactivation	OD7	Lumen	Ileum	"Tetracycline resistance gene tet(X) ortholog described by Fang et al. 2020."
ODIWGS44	ARO:3000617	53	mecA	AGC51118.1	KC243783.1	methicillin resistant PBP2	carbapenem;cephalosporin;cephamycin;monobactam;penam	antibiotic target replacement	OD7	Lumen	Ileum	"A foreign PBP2a acquired by lateral gene transfer that able to perform peptidoglycan synthesis in the presence of beta-lactams."
ODIWGS44	ARO:3005008	442	TxR	AAK37618.1	AF353562.1	ATP-binding cassette (ABC) antibiotic efflux pump	tetracycline antibiotic	antibiotic efflux	OD7	Lumen	Ileum	"TxR is a putative transcription regulator that plays a role in conferring tetracycline resistance. It is required for proper functioning of Tet35."
ODIWGS44	ARO:3000251	347	msrA	CAA36304.1	X52085.1	msr-type ABC-F protein	macrolide antibiotic;streptogramin B antibiotic;streptogramin antibiotic	antibiotic target protection	OD7	Lumen	Ileum	"MsrA is an ABC-F subfamily ribosomal protection protein expressed in Staphylococcus species which confers resistance to erythromycin and streptogramin B antibiotics through antibiotic target protection mechanisms. It is associated with plasmid DNA."
ODIWGS44	ARO:3000215	69	mecR1	ABQ47844.1	CP000703.1	methicillin resistant PBP2	carbapenem;cephalosporin;cephamycin;monobactam;penam	antibiotic target replacement	OD7	Lumen	Ileum	"mecR1 is a transmembrane spanning and signal transducing protein which in response to interaction with beta-lactam antibiotics results in upregulation of the mecA/mecR1/mecI operon."
ODIWGS44	ARO:3000839	240	arlS	ABD30512.1	CP000253.1	major facilitator superfamily (MFS) antibiotic efflux pump	disinfecting agents and antiseptics;fluoroquinolone antibiotic	antibiotic efflux	OD7	Lumen	Ileum	"ArlS is a protein histidine kinase that phosphorylates ArlR, a promoter for norA expression."
ODIWGS44	ARO:3000190	300	tet(O)	AAA23033.2	M18896.2	tetracycline-resistant ribosomal protection protein	tetracycline antibiotic	antibiotic target protection	OD7	Lumen	Ileum	"Tet(O) is a ribosomal protection protein. It is associated with conjugative plasmids."
ODIWGS44	ARO:3000319	38	mphC	BAA34540.1	AB013298.1	macrolide phosphotransferase (MPH)	macrolide antibiotic	antibiotic inactivation	OD7	Lumen	Ileum	"The mphC gene was identified from Staphylococcus aureus. This gene shows similarity to mphB gene from Escherchia coli."
ODIWGS44	ARO:3002647	221	APH(3')-IIIa	AGV10830.1	CP004067.1	APH(3')	aminoglycoside antibiotic	antibiotic inactivation	OD7	Lumen	Ileum	"APH(3')-IIIa is a plasmid-encoded aminoglycoside phosphotransferase in S. aureus and Enterococcus spp."
ODIWGS44	ARO:3000026	232	mepA	AAU95768.1	AY661734.1	multidrug and toxic compound extrusion (MATE) transporter	glycylcycline;tetracycline antibiotic	antibiotic efflux	OD7	Lumen	Ileum	"MepA is an efflux protein regulated by MepR and part of the MepRAB cluster. Its presence in Staphylococcus aureus led to multidrug resistance, while it has also been shown to decrease tigecycline susceptibility."
ODIWGS44	ARO:3002817	59	carA	AAC32027.1	M80346.1	Miscellaneous ABC-F subfamily ATP-binding cassette ribosomal protection proteins	macrolide antibiotic	antibiotic target protection	OD7	Lumen	Ileum	"carA is an ABC-F subfamily protein involved in macrolide resistance. It is found in Streptomyces thermotolerans."
ODIWGS44	ARO:3003905	12	ANT(4')-Ib	ADA62098.1	GQ900432.1	ANT(4')	aminoglycoside antibiotic	antibiotic inactivation	OD7	Lumen	Ileum	"Aminoglycoside nucleotidyltransferase sequence from Staphylococcus aureus plasmid."
ODIWGS44	ARO:3007013	69	sdrM	BAB43261.1	BA000018.3	major facilitator superfamily (MFS) antibiotic efflux pump	disinfecting agents and antiseptics;fluoroquinolone antibiotic	antibiotic efflux	OD7	Lumen	Ileum	"sdrM encodes an efflux pump that confers resistance to norfloxacin and ethidium bromide, making this a multidrug resistance gene."
ODIWGS44	ARO:3002942	77	vanH_in_vanA_cl	AAA65955.1	M97297.1	glycopeptide resistance gene cluster;vanH	glycopeptide antibiotic	antibiotic target alteration	OD7	Lumen	Ileum	"Also known as vanHA, is a vanH variant in the vanA gene cluster."
ODIWGS45	ARO:3003905	16	ANT(4')-Ib	ADA62098.1	GQ900432.1	ANT(4')	aminoglycoside antibiotic	antibiotic inactivation	OD8	Mucosa	Duodenum	"Aminoglycoside nucleotidyltransferase sequence from Staphylococcus aureus plasmid."
ODIWGS45	ARO:3005059	13	LptD	AIA35096.1	CP007727.1	ATP-binding cassette (ABC) antibiotic efflux pump	aminocoumarin antibiotic;peptide antibiotic;rifamycin antibiotic	antibiotic efflux	OD8	Mucosa	Duodenum	"LptD is involved in LPS transport in a ABC Transporter efflux system. It confers resistance to rifamycin, aminocoumarin, and peptide antibiotics."
ODIWGS46	ARO:3000195	11	tetB(P)	AAA20117.1	L20800.1	tetracycline-resistant ribosomal protection protein	tetracycline antibiotic	antibiotic target protection	OD7	Lumen	Jejunum	"TetB(P) is a tetracycline ribosomal protection protein found on the same operon as tetA(P), a tetracycline efflux protein."
ODIWGS46	ARO:3003839	14	Mrx	AAS13767.1	AY522923.1	macrolide phosphotransferase (MPH)	macrolide antibiotic	antibiotic inactivation	OD7	Lumen	Jejunum	"Mrx is part of the macrolide inactivation gene cluster in Aeromonas hydrophila."
ODIWGS46	ARO:3003905	194	ANT(4')-Ib	ADA62098.1	GQ900432.1	ANT(4')	aminoglycoside antibiotic	antibiotic inactivation	OD7	Lumen	Jejunum	"Aminoglycoside nucleotidyltransferase sequence from Staphylococcus aureus plasmid."
ODIWGS46	ARO:3000508	44	gadX	BAE77778.1	AP009048.1	resistance-nodulation-cell division (RND) antibiotic efflux pump	fluoroquinolone antibiotic;macrolide antibiotic;penam	antibiotic efflux	OD7	Lumen	Jejunum	"GadX is an AraC-family regulator that promotes mdtEF expression to confer multidrug resistance."
ODIWGS46	ARO:3005008	38	TxR	AAK37618.1	AF353562.1	ATP-binding cassette (ABC) antibiotic efflux pump	tetracycline antibiotic	antibiotic efflux	OD7	Lumen	Jejunum	"TxR is a putative transcription regulator that plays a role in conferring tetracycline resistance. It is required for proper functioning of Tet35."
ODIWGS46	ARO:3000801	37	MexD	AAB41957.1	U57969.1	resistance-nodulation-cell division (RND) antibiotic efflux pump	aminocoumarin antibiotic;aminoglycoside antibiotic;cephalosporin;diaminopyrimidine antibiotic;fluoroquinolone antibiotic;macrolide antibiotic;penam;phenicol antibiotic;tetracycline antibiotic	antibiotic efflux	OD7	Lumen	Jejunum	"MexD is the multidrug inner membrane transporter of the MexCD-OprJ complex."
ODIWGS46	ARO:3003982	27	LlmA_23S_CLI	APB03216.1	KX531046.1	Llm 23S ribosomal RNA methyltransferase	lincosamide antibiotic	antibiotic target alteration	OD7	Lumen	Jejunum	"Lincosamide (Clindamycin) resistant (putative) ribosomal methyltransferase related to the RlmK 23S rRNA methyltransferase COG family. Detected in Paenibacillus sp. LC231, an isolated strain of Paenibacillus found in Lechuguilla Cave, NM, USA. Described by Pawlowski et al. 2016."
ODIWGS47	ARO:3000300	1801	lsaA	AAO43110.1	AY225127.1	lsa-type ABC-F protein	lincosamide antibiotic;pleuromutilin antibiotic;streptogramin A antibiotic;streptogramin B antibiotic;streptogramin antibiotic	antibiotic target protection	OD2	Lumen	TransverseColon	"LsaA is an ABC-F subfamily protein expressed in Enterococcus faecalis. It confers resistance to clindamycin, quinupristin-dalfopristin, and dalfopristin."
ODIWGS47	ARO:3005009	54	qacE	AEH26330.1	HQ730118.1	major facilitator superfamily (MFS) antibiotic efflux pump	disinfecting agents and antiseptics	antibiotic efflux	OD2	Lumen	TransverseColon	"QacE is a resistance gene conferring resistance to antiseptics."
ODIWGS47	ARO:3004580	27	Kpne_KpnE	BAH63251.1	AP006725.1	small multidrug resistance (SMR) antibiotic efflux pump	aminoglycoside antibiotic;cephalosporin;disinfecting agents and antiseptics;macrolide antibiotic;peptide antibiotic;rifamycin antibiotic;tetracycline antibiotic	antibiotic efflux	OD2	Lumen	TransverseColon	"KpnE subunit of KpnEF resembles EbrAB from E. coli. Mutation in KpnEF resulted in increased susceptibility to cefepime, ceftriaxon, colistin, erythromycin, rifampin, tetracycline, and streptomycin as well as enhanced sensitivity toward sodium dodecyl sulfate, deoxycholate, dyes, benzalkonium chloride, chlorhexidine, and triclosan."
ODIWGS47	ARO:3007015	21	qacG	WP_015740450.1	NG_051904.1	small multidrug resistance (SMR) antibiotic efflux pump	disinfecting agents and antiseptics	antibiotic efflux	OD2	Lumen	TransverseColon	"qacG is a small multidrug resistance efflux pump that confers resistance to benzalkonium chloride and ethidium bromide."
ODIWGS47	ARO:3003948	10893	efrA	WP_104671188.1	NZ_PTWF01000025.1	ATP-binding cassette (ABC) antibiotic efflux pump	fluoroquinolone antibiotic;macrolide antibiotic;rifamycin antibiotic	antibiotic efflux	OD2	Lumen	TransverseColon	"efrA is a part of the EfrAB efflux pump, and both efrA and efrB are necessary to confer drug resistance."
ODIWGS47	ARO:3005098	77	qacL	AAZ42322.1	DQ149925.1	small multidrug resistance (SMR) antibiotic efflux pump	disinfecting agents and antiseptics	antibiotic efflux	OD2	Lumen	TransverseColon	"A subunit of the qac multidrug efflux pump in Vibrio cholerae."
ODIWGS47	ARO:3000815	2918	mgrA	BAB41874.1	BA000018.3	ATP-binding cassette (ABC) antibiotic efflux pump;major facilitator superfamily (MFS) antibiotic efflux pump	cephalosporin;disinfecting agents and antiseptics;fluoroquinolone antibiotic;penam;peptide antibiotic;tetracycline antibiotic	antibiotic efflux	OD2	Lumen	TransverseColon	"MgrA, also known as NorR, is a regulator for norA, norB, and tet38. It is a positive regulator for norA expression, but is a direct repressor for norB and an indirect repressor of tet38."
ODIWGS47	ARO:3000838	9811	arlR	ATC67679.1	CP023390.1	major facilitator superfamily (MFS) antibiotic efflux pump	disinfecting agents and antiseptics;fluoroquinolone antibiotic	antibiotic efflux	OD2	Lumen	TransverseColon	"ArlR is a response regulator that binds to the norA promoter to activate expression. ArlR must first be phosphorylated by ArlS."
ODIWGS47	ARO:3000194	921	tet(W)	CAA10975.1	AJ222769.3	tetracycline-resistant ribosomal protection protein	tetracycline antibiotic	antibiotic target protection	OD2	Lumen	TransverseColon	"Tet(W) is a ribosomal protection protein. It is associated with both conjugative and non conjugative DNA and has been found strains of Clostridioides difficile."
ODIWGS47	ARO:3007014	57	qacJ	CAD55144.1	AJ512814.1	small multidrug resistance (SMR) antibiotic efflux pump	disinfecting agents and antiseptics	antibiotic efflux	OD2	Lumen	TransverseColon	"qacJ is a small multidrug resistance (SMR) efflux pump that confers resistance to quaternary ammonium compounds."
ODIWGS47	ARO:3000565	6314	tet(38)	AAV80464.1	AY825285.1	major facilitator superfamily (MFS) antibiotic efflux pump	tetracycline antibiotic	antibiotic efflux	OD2	Lumen	TransverseColon	"Tet38 is a tetracycline efflux pump found in the Gram-positive Staphylococcus aureus. It is regulated by mgrA, which also regulates NorB."
ODIWGS47	ARO:3000768	338	abeS	ACJ59254.1	CP001172.1	small multidrug resistance (SMR) antibiotic efflux pump	aminocoumarin antibiotic;macrolide antibiotic	antibiotic efflux	OD2	Lumen	TransverseColon	"AbeS in an efflux pump of the SMR family of transporters found in Acinetobacter baumannii."
ODIWGS47	ARO:3003324	9985	Bsub_mprF	CAX52582.1	AL009126.3	defensin resistant mprF	peptide antibiotic	antibiotic target alteration	OD2	Lumen	TransverseColon	"MprF is a integral membrane protein that modifies the negatively-charged phosphatidylglycerol on the membrane surface. This confers resistance to cationic peptides that disrupt the cell membrane, including defensins. Additionally, large-scale mutations causing loss of function of the gene result in increased susceptibility to daptomycin."
ODIWGS47	ARO:3004572	34024	Saur_LmrS	AAW38464.1	CP000046.1	major facilitator superfamily (MFS) antibiotic efflux pump	aminoglycoside antibiotic;diaminopyrimidine antibiotic;macrolide antibiotic;oxazolidinone antibiotic;phenicol antibiotic	antibiotic efflux	OD2	Lumen	TransverseColon	"MFS transporters are secondary active transporters with single-polypeptide chains containing 400-600 amino acids that transport small solutes across the membrane by using electrochemical gradients. LmrS has 14 transmembrane helices and, when expressed in E. coli, is capable of extruding a variety of antibiotics inclinding linezolid, trimethoprim, florfenicol, chlorampheniocol, erythromycin, stre…
ODIWGS47	ARO:3003949	9568	efrB	CDO61516.1	HG970103.1	ATP-binding cassette (ABC) antibiotic efflux pump	fluoroquinolone antibiotic;macrolide antibiotic;rifamycin antibiotic	antibiotic efflux	OD2	Lumen	TransverseColon	"efrB is a part of the EfrAB efflux pump, and both efrA and efrB are necessary to confer multidrug resistance."
ODIWGS47	ARO:3004651	6974	lin	AEO25219.1	CP002003.1	lincosamide nucleotidyltransferase (LNU)	lincosamide antibiotic	antibiotic inactivation	OD2	Lumen	TransverseColon	"Listeria monocytogenes EGD-e lin gene for lincomycin resistance ABC-F type ribosomal protection protein, complete CDS."
ODIWGS47	ARO:3004253	72	vanU_in_vanG_cl	ABA71726.1	DQ212986.1	glycopeptide resistance gene cluster;vanU	glycopeptide antibiotic	antibiotic target alteration	OD2	Lumen	TransverseColon	"Also known as vanUG, is a vanG variant found in the vanG gene cluster."
ODIWGS47	ARO:3000179	6856	tet(L)	AAA22851.1	M11036.1	major facilitator superfamily (MFS) antibiotic efflux pump	tetracycline antibiotic	antibiotic efflux	OD2	Lumen	TransverseColon	"TetL is a tetracycline efflux protein found in many species of Gram-negative and Gram-positive bacteria."
ODIWGS47	ARO:3004075	69	MuxC	AAG05914.1	AE004091.2	resistance-nodulation-cell division (RND) antibiotic efflux pump	aminocoumarin antibiotic;macrolide antibiotic;monobactam;tetracycline antibiotic	antibiotic efflux	OD2	Lumen	TransverseColon	"MuxC is one of the two necessary RND components of the MuxABC-OpmB efflux pumps system in Pseudomonas aeruginosa."
ODIWGS47	ARO:3005010	39	qacEdelta1	AAC44316.1	U49101.1	major facilitator superfamily (MFS) antibiotic efflux pump	disinfecting agents and antiseptics	antibiotic efflux	OD2	Lumen	TransverseColon	"QacEdelta1 is a resistance gene conferring resistance to antiseptics. It is different from QacE only at the 3'-terminus."
ODIWGS47	ARO:3004047	10558	kdpD	CYF42523.1	FHDU01000010.1	kdpDE	aminoglycoside antibiotic	antibiotic efflux	OD2	Lumen	TransverseColon	"kdpD is a component of the two-component regulatory system, kdpDE. This system is involved in potassium transport and homeostasis, and has been implicated in virulence factor regulation along with kdpE."
ODIWGS47	ARO:3003770	15977	Lmon_mprF	CAC99773.1	AL591981.1	defensin resistant mprF	peptide antibiotic	antibiotic target alteration	OD2	Lumen	TransverseColon	"MprF is a integral membrane protein that modifies the negatively-charged phosphatidylglycerol on the membrane surface. This confers resistance to cationic peptides that disrupt the cell membrane, including defensins."
ODIWGS47	ARO:3000746	1862	mepR	BAB56495.1	BA000017.4	multidrug and toxic compound extrusion (MATE) transporter	glycylcycline;tetracycline antibiotic	antibiotic efflux	OD2	Lumen	TransverseColon	"MepR is an upstream repressor of MepA in Staphylococcus aureus. It is part of the mepRAB operon."
ODIWGS47	ARO:3005008	520	TxR	AAK37618.1	AF353562.1	ATP-binding cassette (ABC) antibiotic efflux pump	tetracycline antibiotic	antibiotic efflux	OD2	Lumen	TransverseColon	"TxR is a putative transcription regulator that plays a role in conferring tetracycline resistance. It is required for proper functioning of Tet35."
ODIWGS47	ARO:3000421	13860	norB	CCQ22388.1	HE999704.1	major facilitator superfamily (MFS) antibiotic efflux pump	fluoroquinolone antibiotic	antibiotic efflux	OD2	Lumen	TransverseColon	"NorB is a multidrug efflux pump in Staphylococcus aureus that confers resistance to fluoroquinolones and other structurally unrelated antibiotics like tetracycline. It shares 30% similarity with NorB, and is a structural homolog of Blt of Bacillus subtilis. It is regulated by mgrA, also known as NorR."
ODIWGS47	ARO:3003836	354	qacH	CAA76544.1	Y16945.1	small multidrug resistance (SMR) antibiotic efflux pump	disinfecting agents and antiseptics	antibiotic efflux	OD2	Lumen	TransverseColon	"qacH is a subunit of the qac multidrug efflux pump in Staphylococcus saprophyticus."
ODIWGS47	ARO:3004039	164	Ecol_emrE	CAA77936.1	Z11877.1	small multidrug resistance (SMR) antibiotic efflux pump	macrolide antibiotic	antibiotic efflux	OD2	Lumen	TransverseColon	"Member of the small MDR (multidrug resistance) family of transporters; in Escherichia coli this protein provides resistance against a number of positively charged compounds including ethidium bromide and erythromycin; proton-dependent secondary transporter which exchanges protons for compound translocation."
ODIWGS47	ARO:3000215	92	mecR1	ABQ47844.1	CP000703.1	methicillin resistant PBP2	carbapenem;cephalosporin;cephamycin;monobactam;penam	antibiotic target replacement	OD2	Lumen	TransverseColon	"mecR1 is a transmembrane spanning and signal transducing protein which in response to interaction with beta-lactam antibiotics results in upregulation of the mecA/mecR1/mecI operon."
ODIWGS47	ARO:3003064	268	ykkD	CAB13167.1	AL009126.1	small multidrug resistance (SMR) antibiotic efflux pump	aminoglycoside antibiotic;phenicol antibiotic;tetracycline antibiotic	antibiotic efflux	OD2	Lumen	TransverseColon	"ykkD is an SMR-type protein that is a subunit of the ykkCD efflux pump."
ODIWGS47	ARO:3000198	203	FosX	CWV56762.1	FFFO01000009.1	fosfomycin thiol transferase	phosphonic acid antibiotic	antibiotic inactivation	OD2	Lumen	TransverseColon	"FosX is an enzyme used to confer resistance to fosfomycin. It's dependent on the cofactor, manganese (II), and uses water to generate a vicinal diol."
ODIWGS47	ARO:3000839	6885	arlS	ABD30512.1	CP000253.1	major facilitator superfamily (MFS) antibiotic efflux pump	disinfecting agents and antiseptics;fluoroquinolone antibiotic	antibiotic efflux	OD2	Lumen	TransverseColon	"ArlS is a protein histidine kinase that phosphorylates ArlR, a promoter for norA expression."
ODIWGS47	ARO:3004667	685	Saur_norA	BAA14147.1	D90119.1	major facilitator superfamily (MFS) antibiotic efflux pump	fluoroquinolone antibiotic	antibiotic efflux	OD2	Lumen	TransverseColon	"NorA gene cloned from Staphylococcus aureus conferred relatively high resistance to hydrophilic quinolones such as norfloxacin, enoxacin, ofloxacin, and ciprofloxacin in S. aureus and Escherichia coli. Had low or no resistance at all to hydrophobic ones such as nalidixic acid, oxolinic acid, and sparfloxacin in S. aureus and Escherichia coli."
ODIWGS47	ARO:3000621	23	PC1_blaZ	ABX30738.1	CP000732.1	BlaZ beta-lactamase	penam	antibiotic inactivation	OD2	Lumen	TransverseColon	"The blaZ beta-lactamase is found in Bacillus subtilis and Staphylococcus aureus."
ODIWGS47	ARO:3000026	5279	mepA	AAU95768.1	AY661734.1	multidrug and toxic compound extrusion (MATE) transporter	glycylcycline;tetracycline antibiotic	antibiotic efflux	OD2	Lumen	TransverseColon	"MepA is an efflux protein regulated by MepR and part of the MepRAB cluster. Its presence in Staphylococcus aureus led to multidrug resistance, while it has also been shown to decrease tigecycline susceptibility."
ODIWGS47	ARO:3007010	13574	norC	AGP27106.1	CP005288.1	major facilitator superfamily (MFS) antibiotic efflux pump	disinfecting agents and antiseptics;fluoroquinolone antibiotic	antibiotic efflux	OD2	Lumen	TransverseColon	"NorC is a multidrug efflux pump in Staphylococcus aureus that confers resistance to fluoroquinolones and other structurally unrelated antibiotics like tetracycline. It shares 61% similarity with NorB, and is a structural homolog of Blt of Bacillus subtilis. Like NorA and NorB, NorC is regulated by mgrA, also known as NorR."
ODIWGS47	ARO:3003905	276542	ANT(4')-Ib	ADA62098.1	GQ900432.1	ANT(4')	aminoglycoside antibiotic	antibiotic inactivation	OD2	Lumen	TransverseColon	"Aminoglycoside nucleotidyltransferase sequence from Staphylococcus aureus plasmid."
ODIWGS47	ARO:3000316	20	mphA	BAA03776.1	D16251.1	macrolide phosphotransferase (MPH)	macrolide antibiotic	antibiotic inactivation	OD2	Lumen	TransverseColon	"The mphA gene encodes for resistance enzyme MPH(2')-I which preferentially inactivate 14-membered macrolides (e.g.erythromycin, telithromycin, roxithromycin) over 16-membered macrolides (e.g.tylosin, spiramycin). It phosphorylates macrolides at 2'-OH hydroxyl of desosamine sugar of macrolides in a GTP-dependent manner."
ODIWGS47	ARO:3003839	69	Mrx	AAS13767.1	AY522923.1	macrolide phosphotransferase (MPH)	macrolide antibiotic	antibiotic inactivation	OD2	Lumen	TransverseColon	"Mrx is part of the macrolide inactivation gene cluster in Aeromonas hydrophila."
ODIWGS47	ARO:3005040	76	YajC	TKW44661.1	VAOQ01003483.1	resistance-nodulation-cell division (RND) antibiotic efflux pump	cephalosporin;disinfecting agents and antiseptics;fluoroquinolone antibiotic;glycopeptide antibiotic;glycylcycline;oxazolidinone antibiotic;penam;phenicol antibiotic;rifamycin antibiotic;tetracycline antibiotic	antibiotic efflux	OD2	Lumen	TransverseColon	"YajC interacts with the AcrAB-TolC efflux pump in a way that in uncharacterized but is shown to grant increased fitness in the presence of linezolid, rifampicin, and vancomycin."
ODIWGS47	ARO:3007013	3139	sdrM	BAB43261.1	BA000018.3	major facilitator superfamily (MFS) antibiotic efflux pump	disinfecting agents and antiseptics;fluoroquinolone antibiotic	antibiotic efflux	OD2	Lumen	TransverseColon	"sdrM encodes an efflux pump that confers resistance to norfloxacin and ethidium bromide, making this a multidrug resistance gene."
ODIWGS48	ARO:3000190	86	tet(O)	AAA23033.2	M18896.2	tetracycline-resistant ribosomal protection protein	tetracycline antibiotic	antibiotic target protection	OD8	Lumen	Jejunum	"Tet(O) is a ribosomal protection protein. It is associated with conjugative plasmids."
ODIWGS48	ARO:3003839	29	Mrx	AAS13767.1	AY522923.1	macrolide phosphotransferase (MPH)	macrolide antibiotic	antibiotic inactivation	OD8	Lumen	Jejunum	"Mrx is part of the macrolide inactivation gene cluster in Aeromonas hydrophila."
ODIWGS48	ARO:3000316	10	mphA	BAA03776.1	D16251.1	macrolide phosphotransferase (MPH)	macrolide antibiotic	antibiotic inactivation	OD8	Lumen	Jejunum	"The mphA gene encodes for resistance enzyme MPH(2')-I which preferentially inactivate 14-membered macrolides (e.g.erythromycin, telithromycin, roxithromycin) over 16-membered macrolides (e.g.tylosin, spiramycin). It phosphorylates macrolides at 2'-OH hydroxyl of desosamine sugar of macrolides in a GTP-dependent manner."
ODIWGS48	ARO:3000567	89	tet(40)	CAM12479.1	AM419751.1	major facilitator superfamily (MFS) antibiotic efflux pump	tetracycline antibiotic	antibiotic efflux	OD8	Lumen	Jejunum	"Tet40 is a tetracycline efflux pump found in the Gram-positive Clostridium. It is similar to tetA(P)."
ODIWGS48	ARO:3003905	20	ANT(4')-Ib	ADA62098.1	GQ900432.1	ANT(4')	aminoglycoside antibiotic	antibiotic inactivation	OD8	Lumen	Jejunum	"Aminoglycoside nucleotidyltransferase sequence from Staphylococcus aureus plasmid."
ODIWGS48	ARO:3000194	72	tet(W)	CAA10975.1	AJ222769.3	tetracycline-resistant ribosomal protection protein	tetracycline antibiotic	antibiotic target protection	OD8	Lumen	Jejunum	"Tet(W) is a ribosomal protection protein. It is associated with both conjugative and non conjugative DNA and has been found strains of Clostridioides difficile."
ODIWGS48	ARO:3004583	61	Kpne_KpnF	BAH63252.1	AP006725.1	small multidrug resistance (SMR) antibiotic efflux pump	aminoglycoside antibiotic;cephalosporin;disinfecting agents and antiseptics;macrolide antibiotic;peptide antibiotic;rifamycin antibiotic;tetracycline antibiotic	antibiotic efflux	OD8	Lumen	Jejunum	"KpnF subunit of KpnEF resembles EbrAB from E. coli. Mutation in KpnEF resulted in increased susceptibility to cefepime, ceftriaxon, colistin, erythromycin, rifampin, tetracycline, and streptomycin as well as enhanced sensitivity toward sodium dodecyl sulfate, deoxycholate, dyes, benzalkonium chloride, chlorhexidine, and triclosan."
ODIWGS48	ARO:3007015	46	qacG	WP_015740450.1	NG_051904.1	small multidrug resistance (SMR) antibiotic efflux pump	disinfecting agents and antiseptics	antibiotic efflux	OD8	Lumen	Jejunum	"qacG is a small multidrug resistance efflux pump that confers resistance to benzalkonium chloride and ethidium bromide."
ODIWGS49	ARO:3003839	17	Mrx	AAS13767.1	AY522923.1	macrolide phosphotransferase (MPH)	macrolide antibiotic	antibiotic inactivation	OD5	Lumen	Ileum	"Mrx is part of the macrolide inactivation gene cluster in Aeromonas hydrophila."
ODIWGS49	ARO:3000316	10	mphA	BAA03776.1	D16251.1	macrolide phosphotransferase (MPH)	macrolide antibiotic	antibiotic inactivation	OD5	Lumen	Ileum	"The mphA gene encodes for resistance enzyme MPH(2')-I which preferentially inactivate 14-membered macrolides (e.g.erythromycin, telithromycin, roxithromycin) over 16-membered macrolides (e.g.tylosin, spiramycin). It phosphorylates macrolides at 2'-OH hydroxyl of desosamine sugar of macrolides in a GTP-dependent manner."
ODIWGS50	ARO:3003549	27	mdtO	BAE78083.1	AP009048.1	major facilitator superfamily (MFS) antibiotic efflux pump	disinfecting agents and antiseptics;nucleoside antibiotic	antibiotic efflux	OD9	Mucosa	Jejunum	"Multidrug resistance efflux pump. Could be involved in resistance to puromycin, acriflavine and tetraphenylarsonium chloride."
ODIWGS53	ARO:3000190	61	tet(O)	AAA23033.2	M18896.2	tetracycline-resistant ribosomal protection protein	tetracycline antibiotic	antibiotic target protection	OD5	Mucosa	Duodenum	"Tet(O) is a ribosomal protection protein. It is associated with conjugative plasmids."
ODIWGS53	ARO:3004043	22	Ecol_acrA	AAC73565.1	U00096.3	resistance-nodulation-cell division (RND) antibiotic efflux pump	cephalosporin;disinfecting agents and antiseptics;fluoroquinolone antibiotic;glycylcycline;penam;phenicol antibiotic;rifamycin antibiotic;tetracycline antibiotic	antibiotic efflux	OD5	Mucosa	Duodenum	"AcrA is a subunit of the AcrAB-TolC multidrug efflux system that in E. coli."
ODIWGS53	ARO:3003982	199	LlmA_23S_CLI	APB03216.1	KX531046.1	Llm 23S ribosomal RNA methyltransferase	lincosamide antibiotic	antibiotic target alteration	OD5	Mucosa	Duodenum	"Lincosamide (Clindamycin) resistant (putative) ribosomal methyltransferase related to the RlmK 23S rRNA methyltransferase COG family. Detected in Paenibacillus sp. LC231, an isolated strain of Paenibacillus found in Lechuguilla Cave, NM, USA. Described by Pawlowski et al. 2016."
ODIWGS55	ARO:3003905	22	ANT(4')-Ib	ADA62098.1	GQ900432.1	ANT(4')	aminoglycoside antibiotic	antibiotic inactivation	OD3	Lumen	DescendingColon	"Aminoglycoside nucleotidyltransferase sequence from Staphylococcus aureus plasmid."
ODIWGS57	ARO:3000830	20	cpxA	BAB38260.1	BA000007.3	resistance-nodulation-cell division (RND) antibiotic efflux pump	aminocoumarin antibiotic;aminoglycoside antibiotic	antibiotic efflux	OD8	Mucosa	Ileum	"CpxA is a membrane-localized sensor kinase that is activated by envelope stress. It starts a kinase cascade that activates CpxR, which promotes efflux complex expression."
ODIWGS57	ARO:3000499	73	AcrE	AAC76297.1	U00096.1	resistance-nodulation-cell division (RND) antibiotic efflux pump	cephalosporin;cephamycin;fluoroquinolone antibiotic;penam	antibiotic efflux	OD8	Mucosa	Ileum	"AcrE is a membrane fusion protein, similar to AcrA."
ODIWGS57	ARO:3003838	121	gadW	ANK04027.1	CP015085.1	resistance-nodulation-cell division (RND) antibiotic efflux pump	fluoroquinolone antibiotic;macrolide antibiotic;penam	antibiotic efflux	OD8	Mucosa	Ileum	"GadW is an AraC-family regulator that promotes mdtEF expression to confer multidrug resistance. GadW inhibits GadX-dependent activation. GadW clearly represses gadX and, in situations where GadX is missing, activates gadA and gadBC."
ODIWGS57	ARO:3004580	13	Kpne_KpnE	BAH63251.1	AP006725.1	small multidrug resistance (SMR) antibiotic efflux pump	aminoglycoside antibiotic;cephalosporin;disinfecting agents and antiseptics;macrolide antibiotic;peptide antibiotic;rifamycin antibiotic;tetracycline antibiotic	antibiotic efflux	OD8	Mucosa	Ileum	"KpnE subunit of KpnEF resembles EbrAB from E. coli. Mutation in KpnEF resulted in increased susceptibility to cefepime, ceftriaxon, colistin, erythromycin, rifampin, tetracycline, and streptomycin as well as enhanced sensitivity toward sodium dodecyl sulfate, deoxycholate, dyes, benzalkonium chloride, chlorhexidine, and triclosan."
ODIWGS57	ARO:3003839	150	Mrx	AAS13767.1	AY522923.1	macrolide phosphotransferase (MPH)	macrolide antibiotic	antibiotic inactivation	OD8	Mucosa	Ileum	"Mrx is part of the macrolide inactivation gene cluster in Aeromonas hydrophila."
ODIWGS57	ARO:3000316	91	mphA	BAA03776.1	D16251.1	macrolide phosphotransferase (MPH)	macrolide antibiotic	antibiotic inactivation	OD8	Mucosa	Ileum	"The mphA gene encodes for resistance enzyme MPH(2')-I which preferentially inactivate 14-membered macrolides (e.g.erythromycin, telithromycin, roxithromycin) over 16-membered macrolides (e.g.tylosin, spiramycin). It phosphorylates macrolides at 2'-OH hydroxyl of desosamine sugar of macrolides in a GTP-dependent manner."
ODIWGS57	ARO:3003843	108	leuO	VWQ00850.1	LR730402.1	major facilitator superfamily (MFS) antibiotic efflux pump	disinfecting agents and antiseptics;nucleoside antibiotic	antibiotic efflux	OD8	Mucosa	Ileum	"leuO, a LysR family transcription factor, exists in a wide variety of bacteria of the family Enterobacteriaceae and is involved in the regulation of as yet unidentified genes affecting the stress response and pathogenesis expression. LeuO is also an activator of the MdtNOP efflux pump."
ODIWGS57	ARO:3000491	101	acrD	BAA16344.1	AP009048.1	resistance-nodulation-cell division (RND) antibiotic efflux pump	aminoglycoside antibiotic	antibiotic efflux	OD8	Mucosa	Ileum	"AcrD is an aminoglycoside efflux pump expressed in E. coli. Its expression can be induced by indole, and is regulated by baeRS and cpxAR."
ODIWGS58	ARO:3000186	931	tet(M)	BAB82500.1	AB039845.1	tetracycline-resistant ribosomal protection protein	tetracycline antibiotic	antibiotic target protection	OD9	Lumen	Duodenum	"Tet(M) is a ribosomal protection protein that confers tetracycline resistance. It is found on transposable DNA elements and its horizontal transfer between bacterial species has been documented."
ODIWGS58	ARO:3000616	503	mel	AAL73129.1	AF227521.1	msr-type ABC-F protein	macrolide antibiotic;streptogramin antibiotic	antibiotic target protection	OD9	Lumen	Duodenum	"Mel, a homolog of MsrA, is an ABC-F subfamily protein associated with macrolide resistance. It is expressed on the same operon as mefA and mefE, both MFS-type efflux proteins that confer macrolide resistance."
ODIWGS58	ARO:3002931	2397	vanS_in_vanA_cl	AAA65954.1	M97297.1	glycopeptide resistance gene cluster;vanS	glycopeptide antibiotic	antibiotic target alteration	OD9	Lumen	Duodenum	"Also known as vanSA, is a vanS variant found in the vanA gene cluster."
ODIWGS58	ARO:3002949	12	vanX_in_vanA_cl	AAA65957.1	M97297.1	glycopeptide resistance gene cluster;vanX	glycopeptide antibiotic	antibiotic target alteration	OD9	Lumen	Duodenum	"Also known as vanXA, is a vanX variant found in the vanA gene cluster."
ODIWGS58	ARO:3005098	20	qacL	AAZ42322.1	DQ149925.1	small multidrug resistance (SMR) antibiotic efflux pump	disinfecting agents and antiseptics	antibiotic efflux	OD9	Lumen	Duodenum	"A subunit of the qac multidrug efflux pump in Vibrio cholerae."
ODIWGS58	ARO:3007120	128	tet(O/M/O)	AAR29485.1	AY394560.1	tetracycline-resistant ribosomal protection protein	tetracycline antibiotic	antibiotic target protection	OD9	Lumen	Duodenum	"Tet(O/M/O) is a mosaic tetracycline resistance gene and ribosomal protection protein."
ODIWGS58	ARO:3000815	184	mgrA	BAB41874.1	BA000018.3	ATP-binding cassette (ABC) antibiotic efflux pump;major facilitator superfamily (MFS) antibiotic efflux pump	cephalosporin;disinfecting agents and antiseptics;fluoroquinolone antibiotic;penam;peptide antibiotic;tetracycline antibiotic	antibiotic efflux	OD9	Lumen	Duodenum	"MgrA, also known as NorR, is a regulator for norA, norB, and tet38. It is a positive regulator for norA expression, but is a direct repressor for norB and an indirect repressor of tet38."
ODIWGS58	ARO:3004442	135	tet(W/N/W)	AMP42147.1	KU736867.1	tetracycline-resistant ribosomal protection protein	tetracycline antibiotic	antibiotic target protection	OD9	Lumen	Duodenum	"tet(W/N/W) is a mosaic tetracycline resistance gene and ribosomal protection protein."
ODIWGS58	ARO:3003954	585	efmA	BAG75524.1	AB467372.1	major facilitator superfamily (MFS) antibiotic efflux pump	fluoroquinolone antibiotic;macrolide antibiotic	antibiotic efflux	OD9	Lumen	Duodenum	"efmA is an MFS transporter permease in E. faecium."
ODIWGS58	ARO:3002868	40	dfrG	BAE15963.1	AB205645.1	trimethoprim resistant dihydrofolate reductase dfr	diaminopyrimidine antibiotic	antibiotic target replacement	OD9	Lumen	Duodenum	"dfrG is a plasmid-encoded dihydrofolate reductase found in Staphylococcus aureus."
ODIWGS58	ARO:3000838	4812	arlR	ATC67679.1	CP023390.1	major facilitator superfamily (MFS) antibiotic efflux pump	disinfecting agents and antiseptics;fluoroquinolone antibiotic	antibiotic efflux	OD9	Lumen	Duodenum	"ArlR is a response regulator that binds to the norA promoter to activate expression. ArlR must first be phosphorylated by ArlS."
ODIWGS58	ARO:3000194	696	tet(W)	CAA10975.1	AJ222769.3	tetracycline-resistant ribosomal protection protein	tetracycline antibiotic	antibiotic target protection	OD9	Lumen	Duodenum	"Tet(W) is a ribosomal protection protein. It is associated with both conjugative and non conjugative DNA and has been found strains of Clostridioides difficile."
ODIWGS58	ARO:3000565	312	tet(38)	AAV80464.1	AY825285.1	major facilitator superfamily (MFS) antibiotic efflux pump	tetracycline antibiotic	antibiotic efflux	OD9	Lumen	Duodenum	"Tet38 is a tetracycline efflux pump found in the Gram-positive Staphylococcus aureus. It is regulated by mgrA, which also regulates NorB."
ODIWGS58	ARO:3002871	77	tet(37)	AAN28721.1	AF540889.1	tetracycline inactivation enzyme	tetracycline antibiotic	antibiotic inactivation	OD9	Lumen	Duodenum	"tet(37) is a chromosome-encoded oxidoreductase isolated from an uncultured bacterium that confers resistance to tetracycline."
ODIWGS58	ARO:3007047	150	mefH	QQM99829.1	MW269960.1	major facilitator superfamily (MFS) antibiotic efflux pump	macrolide antibiotic	antibiotic efflux	OD9	Lumen	Duodenum	"mefH is an mef efflux pump protein."
ODIWGS58	ARO:3002837	31	lnuC	AAY32951.1	AY928180.1	lincosamide nucleotidyltransferase (LNU)	lincosamide antibiotic	antibiotic inactivation	OD9	Lumen	Duodenum	"lnuC is a transposon-mediated nucleotidyltransferase found in Streptococcus agalactiae."
ODIWGS58	ARO:3000768	16	abeS	ACJ59254.1	CP001172.1	small multidrug resistance (SMR) antibiotic efflux pump	aminocoumarin antibiotic;macrolide antibiotic	antibiotic efflux	OD9	Lumen	Duodenum	"AbeS in an efflux pump of the SMR family of transporters found in Acinetobacter baumannii."
ODIWGS58	ARO:3002867	69	dfrF	AAD01868.1	AF028812.1	trimethoprim resistant dihydrofolate reductase dfr	diaminopyrimidine antibiotic	antibiotic target replacement	OD9	Lumen	Duodenum	"dfrF is a chromosome-encoded dihydrofolate reductase found in Streptococcus pyogenes."
ODIWGS58	ARO:3007121	185	tet(O/W)	AAR29969.1	AY485122.1	tetracycline-resistant ribosomal protection protein	tetracycline antibiotic	antibiotic target protection	OD9	Lumen	Duodenum	"Tet(O/W) is a mosaic tetracycline resistance gene and ribosomal protection protein."
ODIWGS58	ARO:3000195	3176	tetB(P)	AAA20117.1	L20800.1	tetracycline-resistant ribosomal protection protein	tetracycline antibiotic	antibiotic target protection	OD9	Lumen	Duodenum	"TetB(P) is a tetracycline ribosomal protection protein found on the same operon as tetA(P), a tetracycline efflux protein."
ODIWGS58	ARO:3002882	17884	lmrD	AYV52072.1	CP033607.1	ATP-binding cassette (ABC) antibiotic efflux pump	lincosamide antibiotic	antibiotic efflux	OD9	Lumen	Duodenum	"lmrD is a chromosomally-encoded efflux pump that confers resistance to lincosamides in Streptomyces lincolnensis and Lactococcus lactis. It can dimerize with lmrC."
ODIWGS58	ARO:3000196	1673	tet(32)	ACH87088.1	EU722333.1	tetracycline-resistant ribosomal protection protein	tetracycline antibiotic	antibiotic target protection	OD9	Lumen	Duodenum	"Tet(32) is a tetracycline resistance gene similar to Tet(O), and binds to the ribosome to confer tetracycline resistance as a ribosomal protection protein."
ODIWGS58	ARO:3000567	74	tet(40)	CAM12479.1	AM419751.1	major facilitator superfamily (MFS) antibiotic efflux pump	tetracycline antibiotic	antibiotic efflux	OD9	Lumen	Duodenum	"Tet40 is a tetracycline efflux pump found in the Gram-positive Clostridium. It is similar to tetA(P)."
ODIWGS58	ARO:3004572	1781	Saur_LmrS	AAW38464.1	CP000046.1	major facilitator superfamily (MFS) antibiotic efflux pump	aminoglycoside antibiotic;diaminopyrimidine antibiotic;macrolide antibiotic;oxazolidinone antibiotic;phenicol antibiotic	antibiotic efflux	OD9	Lumen	Duodenum	"MFS transporters are secondary active transporters with single-polypeptide chains containing 400-600 amino acids that transport small solutes across the membrane by using electrochemical gradients. LmrS has 14 transmembrane helices and, when expressed in E. coli, is capable of extruding a variety of antibiotics inclinding linezolid, trimethoprim, florfenicol, chlorampheniocol, erythromycin, stre…
ODIWGS58	ARO:3003112	862	lsaC	AEA37904.1	HM990671.1	lsa-type ABC-F protein	lincosamide antibiotic;pleuromutilin antibiotic;streptogramin antibiotic	antibiotic target protection	OD9	Lumen	Duodenum	"LsaC is an ABC-F subfamily protein expressed in Streptococcus agalactiae. It confers resistance to lincomycin, clindamycin, dalfopristin, and tiamulin."
ODIWGS58	ARO:3000192	4753	tet(S)	AAA25293.1	L09756.1	tetracycline-resistant ribosomal protection protein	tetracycline antibiotic	antibiotic target protection	OD9	Lumen	Duodenum	"Tet(S) is a ribosomal protection protein found in Gram-positive and Gram-negative strains. It is similar to tet(M) and tet(O)."
ODIWGS58	ARO:3004253	393	vanU_in_vanG_cl	ABA71726.1	DQ212986.1	glycopeptide resistance gene cluster;vanU	glycopeptide antibiotic	antibiotic target alteration	OD9	Lumen	Duodenum	"Also known as vanUG, is a vanG variant found in the vanG gene cluster."
ODIWGS58	ARO:3002955	87	vanY_in_vanA_cl	AAA65958.1	M97297.1	glycopeptide resistance gene cluster;vanY	glycopeptide antibiotic	antibiotic target alteration	OD9	Lumen	Duodenum	"Also known as vanYA, is a vanY variant found in the vanA gene cluster."
ODIWGS58	ARO:3002897	190	SAT-4	AAB53445.1	U01945.1	streptothricin acetyltransferase (SAT)	nucleoside antibiotic	antibiotic inactivation	OD9	Lumen	Duodenum	"SAT-4 is a plasmid-mediated streptothricin acetyltransferase and streptothricin (a nucleoside antibiotic) resistant determinant. Originally described from a Campylobacter coli BE/G4 plasmid gene sequence by Jacob et al, 1994."
ODIWGS58	ARO:3000391	53	norA	AAS68233.1	AY566250.1	major facilitator superfamily (MFS) antibiotic efflux pump	disinfecting agents and antiseptics;fluoroquinolone antibiotic	antibiotic efflux	OD9	Lumen	Duodenum	"NorA is a multidrug efflux pump in Staphylococcus aureus that confers resistance to fluoroquinolones and other structurally unrelated antibiotics like acriflavine. It shares 30% similarity with NorA, and is a structural homolog of Bmr of Bacillus subtilis. It is regulated by arlRS and mgrA, the latter also known as NorR."
ODIWGS58	ARO:3007122	234	tet(O/W/32/O)	ABF69686.1	DQ525023.1	tetracycline-resistant ribosomal protection protein	tetracycline antibiotic	antibiotic target protection	OD9	Lumen	Duodenum	"Tet(O/W/32/O) is a mosaic tetracycline resistance gene and ribosomal protection protein."
ODIWGS58	ARO:3002962	85	vanZ_in_vanA_cl	AAA65959.1	M97297.1	glycopeptide resistance gene cluster;vanZ	glycopeptide antibiotic	antibiotic target alteration	OD9	Lumen	Duodenum	"Also known as vanZA, is a vanZ variant found in the vanA gene cluster."
ODIWGS58	ARO:3005010	11	qacEdelta1	AAC44316.1	U49101.1	major facilitator superfamily (MFS) antibiotic efflux pump	disinfecting agents and antiseptics	antibiotic efflux	OD9	Lumen	Duodenum	"QacEdelta1 is a resistance gene conferring resistance to antiseptics. It is different from QacE only at the 3'-terminus."
ODIWGS58	ARO:3004047	3282	kdpD	CYF42523.1	FHDU01000010.1	kdpDE	aminoglycoside antibiotic	antibiotic efflux	OD9	Lumen	Duodenum	"kdpD is a component of the two-component regulatory system, kdpDE. This system is involved in potassium transport and homeostasis, and has been implicated in virulence factor regulation along with kdpE."
ODIWGS58	ARO:3000010	222	vanA	AAA65956.1	M97297.1	Van ligase;glycopeptide resistance gene cluster	glycopeptide antibiotic	antibiotic target alteration	OD9	Lumen	Duodenum	"VanA is a D-Ala-D-Ala ligase homolog that synthesizes D-Ala-D-Lac, an alternative substrate for peptidoglycan synthesis that reduces vancomycin binding affinity. It has been isolated from VREs. It is associated with both vancomycin and teicoplanin resistance."
ODIWGS58	ARO:3000617	364	mecA	AGC51118.1	KC243783.1	methicillin resistant PBP2	carbapenem;cephalosporin;cephamycin;monobactam;penam	antibiotic target replacement	OD9	Lumen	Duodenum	"A foreign PBP2a acquired by lateral gene transfer that able to perform peptidoglycan synthesis in the presence of beta-lactams."
ODIWGS58	ARO:3004032	7470	tetA(46)	AET10444.1	HQ652506.1	ATP-binding cassette (ABC) antibiotic efflux pump	tetracycline antibiotic	antibiotic efflux	OD9	Lumen	Duodenum	"tetA(46) is a subunit of tetAB(46), a heterodimeric ABC transporter, that is required for conferring tetracycline resistance in Streptococcus australis isolated from the oral cavity."
ODIWGS58	ARO:3000746	271	mepR	BAB56495.1	BA000017.4	multidrug and toxic compound extrusion (MATE) transporter	glycylcycline;tetracycline antibiotic	antibiotic efflux	OD9	Lumen	Duodenum	"MepR is an upstream repressor of MepA in Staphylococcus aureus. It is part of the mepRAB operon."
ODIWGS58	ARO:3000251	1478	msrA	CAA36304.1	X52085.1	msr-type ABC-F protein	macrolide antibiotic;streptogramin B antibiotic;streptogramin antibiotic	antibiotic target protection	OD9	Lumen	Duodenum	"MsrA is an ABC-F subfamily ribosomal protection protein expressed in Staphylococcus species which confers resistance to erythromycin and streptogramin B antibiotics through antibiotic target protection mechanisms. It is associated with plasmid DNA."
ODIWGS58	ARO:3004039	11	Ecol_emrE	CAA77936.1	Z11877.1	small multidrug resistance (SMR) antibiotic efflux pump	macrolide antibiotic	antibiotic efflux	OD9	Lumen	Duodenum	"Member of the small MDR (multidrug resistance) family of transporters; in Escherichia coli this protein provides resistance against a number of positively charged compounds including ethidium bromide and erythromycin; proton-dependent secondary transporter which exchanges protons for compound translocation."
ODIWGS58	ARO:3000215	286	mecR1	ABQ47844.1	CP000703.1	methicillin resistant PBP2	carbapenem;cephalosporin;cephamycin;monobactam;penam	antibiotic target replacement	OD9	Lumen	Duodenum	"mecR1 is a transmembrane spanning and signal transducing protein which in response to interaction with beta-lactam antibiotics results in upregulation of the mecA/mecR1/mecI operon."
ODIWGS58	ARO:3000839	2290	arlS	ABD30512.1	CP000253.1	major facilitator superfamily (MFS) antibiotic efflux pump	disinfecting agents and antiseptics;fluoroquinolone antibiotic	antibiotic efflux	OD9	Lumen	Duodenum	"ArlS is a protein histidine kinase that phosphorylates ArlR, a promoter for norA expression."
ODIWGS58	ARO:3002556	17	AAC(6')-Ii	AAB63533.1	L12710.1	AAC(6')	aminoglycoside antibiotic	antibiotic inactivation	OD9	Lumen	Duodenum	"AAC(6')-Ii is a chromosomal-encoded aminoglycoside acetyltransferase in Enterococcus spp."
ODIWGS58	ARO:3002628	28	aad(6)	AAU10334.1	AY712687.1	ANT(6)	aminoglycoside antibiotic	antibiotic inactivation	OD9	Lumen	Duodenum	"ANT(6)-Ia/aad(6) is a plasmid-encoded aminoglycoside nucleotidyltransferase gene in E. faecalis and Streptococcus oralis."
ODIWGS58	ARO:3000190	1370	tet(O)	AAA23033.2	M18896.2	tetracycline-resistant ribosomal protection protein	tetracycline antibiotic	antibiotic target protection	OD9	Lumen	Duodenum	"Tet(O) is a ribosomal protection protein. It is associated with conjugative plasmids."
ODIWGS58	ARO:3000319	239	mphC	BAA34540.1	AB013298.1	macrolide phosphotransferase (MPH)	macrolide antibiotic	antibiotic inactivation	OD9	Lumen	Duodenum	"The mphC gene was identified from Staphylococcus aureus. This gene shows similarity to mphB gene from Escherchia coli."
ODIWGS58	ARO:3004667	13	Saur_norA	BAA14147.1	D90119.1	major facilitator superfamily (MFS) antibiotic efflux pump	fluoroquinolone antibiotic	antibiotic efflux	OD9	Lumen	Duodenum	"NorA gene cloned from Staphylococcus aureus conferred relatively high resistance to hydrophilic quinolones such as norfloxacin, enoxacin, ofloxacin, and ciprofloxacin in S. aureus and Escherichia coli. Had low or no resistance at all to hydrophobic ones such as nalidixic acid, oxolinic acid, and sparfloxacin in S. aureus and Escherichia coli."
ODIWGS58	ARO:3002647	1088	APH(3')-IIIa	AGV10830.1	CP004067.1	APH(3')	aminoglycoside antibiotic	antibiotic inactivation	OD9	Lumen	Duodenum	"APH(3')-IIIa is a plasmid-encoded aminoglycoside phosphotransferase in S. aureus and Enterococcus spp."
ODIWGS58	ARO:3000245	17	RbpA	ADV91011.1	HQ203032.1	RbpA bacterial RNA polymerase-binding protein	rifamycin antibiotic	antibiotic target protection	OD9	Lumen	Duodenum	"RNA-polymerase binding protein which confers resistance to rifampin."
ODIWGS58	ARO:3002919	3612	vanR_in_vanA_cl	AAA65953.1	M97297.1	glycopeptide resistance gene cluster;vanR	glycopeptide antibiotic	antibiotic target alteration	OD9	Lumen	Duodenum	"Also known as vanRA, is a vanR variant found in the vanA gene cluster."
ODIWGS58	ARO:3000026	1346	mepA	AAU95768.1	AY661734.1	multidrug and toxic compound extrusion (MATE) transporter	glycylcycline;tetracycline antibiotic	antibiotic efflux	OD9	Lumen	Duodenum	"MepA is an efflux protein regulated by MepR and part of the MepRAB cluster. Its presence in Staphylococcus aureus led to multidrug resistance, while it has also been shown to decrease tigecycline susceptibility."
ODIWGS58	ARO:3007010	472	norC	AGP27106.1	CP005288.1	major facilitator superfamily (MFS) antibiotic efflux pump	disinfecting agents and antiseptics;fluoroquinolone antibiotic	antibiotic efflux	OD9	Lumen	Duodenum	"NorC is a multidrug efflux pump in Staphylococcus aureus that confers resistance to fluoroquinolones and other structurally unrelated antibiotics like tetracycline. It shares 61% similarity with NorB, and is a structural homolog of Blt of Bacillus subtilis. Like NorA and NorB, NorC is regulated by mgrA, also known as NorR."
ODIWGS58	ARO:3000180	48	tetA(P)	AAA20116.1	L20800.1	major facilitator superfamily (MFS) antibiotic efflux pump	tetracycline antibiotic	antibiotic efflux	OD9	Lumen	Duodenum	"TetA(P) is a inner membrane tetracycline efflux protein found on the same operon as the ribosomal protection protein TetB(P). It is found in Clostridium, a Gram-positive bacterium."
ODIWGS58	ARO:3007119	658	tet(O/32/O)	CAC41371.2	AJ295238.3	tetracycline-resistant ribosomal protection protein	tetracycline antibiotic	antibiotic target protection	OD9	Lumen	Duodenum	"Tet(O/32/O) is a mosaic tetracycline resistance gene and ribosomal protection protein."
ODIWGS58	ARO:3005040	34	YajC	TKW44661.1	VAOQ01003483.1	resistance-nodulation-cell division (RND) antibiotic efflux pump	cephalosporin;disinfecting agents and antiseptics;fluoroquinolone antibiotic;glycopeptide antibiotic;glycylcycline;oxazolidinone antibiotic;penam;phenicol antibiotic;rifamycin antibiotic;tetracycline antibiotic	antibiotic efflux	OD9	Lumen	Duodenum	"YajC interacts with the AcrAB-TolC efflux pump in a way that in uncharacterized but is shown to grant increased fitness in the presence of linezolid, rifampicin, and vancomycin."
ODIWGS58	ARO:3000375	71	ErmB	AAF86219.1	AF242872.1	Erm 23S ribosomal RNA methyltransferase	lincosamide antibiotic;macrolide antibiotic;streptogramin A antibiotic;streptogramin B antibiotic;streptogramin antibiotic	antibiotic target alteration	OD9	Lumen	Duodenum	"ErmB confers the MLSb phenotype. Similar to ErmC, expression of ErmB is inducible by erythromycin. The leader peptide causes attenuation of the mRNA and stabilizes the structure preventing further translation. When erythromycin is present, it binds the leader peptide causing a change in conformation allowing for the expression of ErmB."
ODIWGS58	ARO:3007013	377	sdrM	BAB43261.1	BA000018.3	major facilitator superfamily (MFS) antibiotic efflux pump	disinfecting agents and antiseptics;fluoroquinolone antibiotic	antibiotic efflux	OD9	Lumen	Duodenum	"sdrM encodes an efflux pump that confers resistance to norfloxacin and ethidium bromide, making this a multidrug resistance gene."
ODIWGS58	ARO:3002942	671	vanH_in_vanA_cl	AAA65955.1	M97297.1	glycopeptide resistance gene cluster;vanH	glycopeptide antibiotic	antibiotic target alteration	OD9	Lumen	Duodenum	"Also known as vanHA, is a vanH variant in the vanA gene cluster."
ODIWGS59	ARO:3003982	19	LlmA_23S_CLI	APB03216.1	KX531046.1	Llm 23S ribosomal RNA methyltransferase	lincosamide antibiotic	antibiotic target alteration	OD5	Mucosa	Jejunum	"Lincosamide (Clindamycin) resistant (putative) ribosomal methyltransferase related to the RlmK 23S rRNA methyltransferase COG family. Detected in Paenibacillus sp. LC231, an isolated strain of Paenibacillus found in Lechuguilla Cave, NM, USA. Described by Pawlowski et al. 2016."
ODIWGS60	ARO:3000186	719	tet(M)	BAB82500.1	AB039845.1	tetracycline-resistant ribosomal protection protein	tetracycline antibiotic	antibiotic target protection	OD2	Lumen	DescendingColon	"Tet(M) is a ribosomal protection protein that confers tetracycline resistance. It is found on transposable DNA elements and its horizontal transfer between bacterial species has been documented."
ODIWGS60	ARO:3000616	473	mel	AAL73129.1	AF227521.1	msr-type ABC-F protein	macrolide antibiotic;streptogramin antibiotic	antibiotic target protection	OD2	Lumen	DescendingColon	"Mel, a homolog of MsrA, is an ABC-F subfamily protein associated with macrolide resistance. It is expressed on the same operon as mefA and mefE, both MFS-type efflux proteins that confer macrolide resistance."
ODIWGS60	ARO:3002931	1774	vanS_in_vanA_cl	AAA65954.1	M97297.1	glycopeptide resistance gene cluster;vanS	glycopeptide antibiotic	antibiotic target alteration	OD2	Lumen	DescendingColon	"Also known as vanSA, is a vanS variant found in the vanA gene cluster."
ODIWGS60	ARO:3007120	74	tet(O/M/O)	AAR29485.1	AY394560.1	tetracycline-resistant ribosomal protection protein	tetracycline antibiotic	antibiotic target protection	OD2	Lumen	DescendingColon	"Tet(O/M/O) is a mosaic tetracycline resistance gene and ribosomal protection protein."
ODIWGS60	ARO:3000815	249	mgrA	BAB41874.1	BA000018.3	ATP-binding cassette (ABC) antibiotic efflux pump;major facilitator superfamily (MFS) antibiotic efflux pump	cephalosporin;disinfecting agents and antiseptics;fluoroquinolone antibiotic;penam;peptide antibiotic;tetracycline antibiotic	antibiotic efflux	OD2	Lumen	DescendingColon	"MgrA, also known as NorR, is a regulator for norA, norB, and tet38. It is a positive regulator for norA expression, but is a direct repressor for norB and an indirect repressor of tet38."
ODIWGS60	ARO:3004442	82	tet(W/N/W)	AMP42147.1	KU736867.1	tetracycline-resistant ribosomal protection protein	tetracycline antibiotic	antibiotic target protection	OD2	Lumen	DescendingColon	"tet(W/N/W) is a mosaic tetracycline resistance gene and ribosomal protection protein."
ODIWGS60	ARO:3003954	654	efmA	BAG75524.1	AB467372.1	major facilitator superfamily (MFS) antibiotic efflux pump	fluoroquinolone antibiotic;macrolide antibiotic	antibiotic efflux	OD2	Lumen	DescendingColon	"efmA is an MFS transporter permease in E. faecium."
ODIWGS60	ARO:3002868	82	dfrG	BAE15963.1	AB205645.1	trimethoprim resistant dihydrofolate reductase dfr	diaminopyrimidine antibiotic	antibiotic target replacement	OD2	Lumen	DescendingColon	"dfrG is a plasmid-encoded dihydrofolate reductase found in Staphylococcus aureus."
ODIWGS60	ARO:3000838	4211	arlR	ATC67679.1	CP023390.1	major facilitator superfamily (MFS) antibiotic efflux pump	disinfecting agents and antiseptics;fluoroquinolone antibiotic	antibiotic efflux	OD2	Lumen	DescendingColon	"ArlR is a response regulator that binds to the norA promoter to activate expression. ArlR must first be phosphorylated by ArlS."
ODIWGS60	ARO:3000194	545	tet(W)	CAA10975.1	AJ222769.3	tetracycline-resistant ribosomal protection protein	tetracycline antibiotic	antibiotic target protection	OD2	Lumen	DescendingColon	"Tet(W) is a ribosomal protection protein. It is associated with both conjugative and non conjugative DNA and has been found strains of Clostridioides difficile."
ODIWGS60	ARO:3000565	562	tet(38)	AAV80464.1	AY825285.1	major facilitator superfamily (MFS) antibiotic efflux pump	tetracycline antibiotic	antibiotic efflux	OD2	Lumen	DescendingColon	"Tet38 is a tetracycline efflux pump found in the Gram-positive Staphylococcus aureus. It is regulated by mgrA, which also regulates NorB."
ODIWGS60	ARO:3002871	62	tet(37)	AAN28721.1	AF540889.1	tetracycline inactivation enzyme	tetracycline antibiotic	antibiotic inactivation	OD2	Lumen	DescendingColon	"tet(37) is a chromosome-encoded oxidoreductase isolated from an uncultured bacterium that confers resistance to tetracycline."
ODIWGS60	ARO:3007047	85	mefH	QQM99829.1	MW269960.1	major facilitator superfamily (MFS) antibiotic efflux pump	macrolide antibiotic	antibiotic efflux	OD2	Lumen	DescendingColon	"mefH is an mef efflux pump protein."
ODIWGS60	ARO:3002837	16	lnuC	AAY32951.1	AY928180.1	lincosamide nucleotidyltransferase (LNU)	lincosamide antibiotic	antibiotic inactivation	OD2	Lumen	DescendingColon	"lnuC is a transposon-mediated nucleotidyltransferase found in Streptococcus agalactiae."
ODIWGS60	ARO:3004038	18	Paer_emrE	AAG08375.1	AE004091.2	small multidrug resistance (SMR) antibiotic efflux pump	aminoglycoside antibiotic	antibiotic efflux	OD2	Lumen	DescendingColon	"EmrE is a small multidrug transporter that functions as a homodimer and that couples the efflux of small polyaromatic cations from the cell with the import of protons down an electrochemical gradient. Confers resistance to tetraphenylphosphonium, methyl viologen, gentamicin, kanamycin, and neomycin."
ODIWGS60	ARO:3000768	46	abeS	ACJ59254.1	CP001172.1	small multidrug resistance (SMR) antibiotic efflux pump	aminocoumarin antibiotic;macrolide antibiotic	antibiotic efflux	OD2	Lumen	DescendingColon	"AbeS in an efflux pump of the SMR family of transporters found in Acinetobacter baumannii."
ODIWGS60	ARO:3002867	50	dfrF	AAD01868.1	AF028812.1	trimethoprim resistant dihydrofolate reductase dfr	diaminopyrimidine antibiotic	antibiotic target replacement	OD2	Lumen	DescendingColon	"dfrF is a chromosome-encoded dihydrofolate reductase found in Streptococcus pyogenes."
ODIWGS60	ARO:3007121	92	tet(O/W)	AAR29969.1	AY485122.1	tetracycline-resistant ribosomal protection protein	tetracycline antibiotic	antibiotic target protection	OD2	Lumen	DescendingColon	"Tet(O/W) is a mosaic tetracycline resistance gene and ribosomal protection protein."
ODIWGS60	ARO:3007124	867	tet(W/32/O)	AAL09826.1	AY049983.2	tetracycline-resistant ribosomal protection protein	tetracycline antibiotic	antibiotic target protection	OD2	Lumen	DescendingColon	"Tet(W/32/O) is a mosaic tetracycline resistance gene and ribosomal protection protein."
ODIWGS60	ARO:3002882	13657	lmrD	AYV52072.1	CP033607.1	ATP-binding cassette (ABC) antibiotic efflux pump	lincosamide antibiotic	antibiotic efflux	OD2	Lumen	DescendingColon	"lmrD is a chromosomally-encoded efflux pump that confers resistance to lincosamides in Streptomyces lincolnensis and Lactococcus lactis. It can dimerize with lmrC."
ODIWGS60	ARO:3000196	1302	tet(32)	ACH87088.1	EU722333.1	tetracycline-resistant ribosomal protection protein	tetracycline antibiotic	antibiotic target protection	OD2	Lumen	DescendingColon	"Tet(32) is a tetracycline resistance gene similar to Tet(O), and binds to the ribosome to confer tetracycline resistance as a ribosomal protection protein."
ODIWGS60	ARO:3000567	16	tet(40)	CAM12479.1	AM419751.1	major facilitator superfamily (MFS) antibiotic efflux pump	tetracycline antibiotic	antibiotic efflux	OD2	Lumen	DescendingColon	"Tet40 is a tetracycline efflux pump found in the Gram-positive Clostridium. It is similar to tetA(P)."
ODIWGS60	ARO:3004572	1650	Saur_LmrS	AAW38464.1	CP000046.1	major facilitator superfamily (MFS) antibiotic efflux pump	aminoglycoside antibiotic;diaminopyrimidine antibiotic;macrolide antibiotic;oxazolidinone antibiotic;phenicol antibiotic	antibiotic efflux	OD2	Lumen	DescendingColon	"MFS transporters are secondary active transporters with single-polypeptide chains containing 400-600 amino acids that transport small solutes across the membrane by using electrochemical gradients. LmrS has 14 transmembrane helices and, when expressed in E. coli, is capable of extruding a variety of antibiotics inclinding linezolid, trimethoprim, florfenicol, chlorampheniocol, erythromycin, stre…
ODIWGS60	ARO:3003112	829	lsaC	AEA37904.1	HM990671.1	lsa-type ABC-F protein	lincosamide antibiotic;pleuromutilin antibiotic;streptogramin antibiotic	antibiotic target protection	OD2	Lumen	DescendingColon	"LsaC is an ABC-F subfamily protein expressed in Streptococcus agalactiae. It confers resistance to lincomycin, clindamycin, dalfopristin, and tiamulin."
ODIWGS60	ARO:3000192	3328	tet(S)	AAA25293.1	L09756.1	tetracycline-resistant ribosomal protection protein	tetracycline antibiotic	antibiotic target protection	OD2	Lumen	DescendingColon	"Tet(S) is a ribosomal protection protein found in Gram-positive and Gram-negative strains. It is similar to tet(M) and tet(O)."
ODIWGS60	ARO:3004253	296	vanU_in_vanG_cl	ABA71726.1	DQ212986.1	glycopeptide resistance gene cluster;vanU	glycopeptide antibiotic	antibiotic target alteration	OD2	Lumen	DescendingColon	"Also known as vanUG, is a vanG variant found in the vanG gene cluster."
ODIWGS60	ARO:3002955	41	vanY_in_vanA_cl	AAA65958.1	M97297.1	glycopeptide resistance gene cluster;vanY	glycopeptide antibiotic	antibiotic target alteration	OD2	Lumen	DescendingColon	"Also known as vanYA, is a vanY variant found in the vanA gene cluster."
ODIWGS60	ARO:3002897	330	SAT-4	AAB53445.1	U01945.1	streptothricin acetyltransferase (SAT)	nucleoside antibiotic	antibiotic inactivation	OD2	Lumen	DescendingColon	"SAT-4 is a plasmid-mediated streptothricin acetyltransferase and streptothricin (a nucleoside antibiotic) resistant determinant. Originally described from a Campylobacter coli BE/G4 plasmid gene sequence by Jacob et al, 1994."
ODIWGS60	ARO:3007122	141	tet(O/W/32/O)	ABF69686.1	DQ525023.1	tetracycline-resistant ribosomal protection protein	tetracycline antibiotic	antibiotic target protection	OD2	Lumen	DescendingColon	"Tet(O/W/32/O) is a mosaic tetracycline resistance gene and ribosomal protection protein."
ODIWGS60	ARO:3002962	96	vanZ_in_vanA_cl	AAA65959.1	M97297.1	glycopeptide resistance gene cluster;vanZ	glycopeptide antibiotic	antibiotic target alteration	OD2	Lumen	DescendingColon	"Also known as vanZA, is a vanZ variant found in the vanA gene cluster."
ODIWGS60	ARO:3004047	2972	kdpD	CYF42523.1	FHDU01000010.1	kdpDE	aminoglycoside antibiotic	antibiotic efflux	OD2	Lumen	DescendingColon	"kdpD is a component of the two-component regulatory system, kdpDE. This system is involved in potassium transport and homeostasis, and has been implicated in virulence factor regulation along with kdpE."
ODIWGS60	ARO:3000010	304	vanA	AAA65956.1	M97297.1	Van ligase;glycopeptide resistance gene cluster	glycopeptide antibiotic	antibiotic target alteration	OD2	Lumen	DescendingColon	"VanA is a D-Ala-D-Ala ligase homolog that synthesizes D-Ala-D-Lac, an alternative substrate for peptidoglycan synthesis that reduces vancomycin binding affinity. It has been isolated from VREs. It is associated with both vancomycin and teicoplanin resistance."
ODIWGS60	ARO:3000617	350	mecA	AGC51118.1	KC243783.1	methicillin resistant PBP2	carbapenem;cephalosporin;cephamycin;monobactam;penam	antibiotic target replacement	OD2	Lumen	DescendingColon	"A foreign PBP2a acquired by lateral gene transfer that able to perform peptidoglycan synthesis in the presence of beta-lactams."
ODIWGS60	ARO:3000746	389	mepR	BAB56495.1	BA000017.4	multidrug and toxic compound extrusion (MATE) transporter	glycylcycline;tetracycline antibiotic	antibiotic efflux	OD2	Lumen	DescendingColon	"MepR is an upstream repressor of MepA in Staphylococcus aureus. It is part of the mepRAB operon."
ODIWGS60	ARO:3000251	1858	msrA	CAA36304.1	X52085.1	msr-type ABC-F protein	macrolide antibiotic;streptogramin B antibiotic;streptogramin antibiotic	antibiotic target protection	OD2	Lumen	DescendingColon	"MsrA is an ABC-F subfamily ribosomal protection protein expressed in Staphylococcus species which confers resistance to erythromycin and streptogramin B antibiotics through antibiotic target protection mechanisms. It is associated with plasmid DNA."
ODIWGS60	ARO:3000215	191	mecR1	ABQ47844.1	CP000703.1	methicillin resistant PBP2	carbapenem;cephalosporin;cephamycin;monobactam;penam	antibiotic target replacement	OD2	Lumen	DescendingColon	"mecR1 is a transmembrane spanning and signal transducing protein which in response to interaction with beta-lactam antibiotics results in upregulation of the mecA/mecR1/mecI operon."
ODIWGS60	ARO:3000839	1778	arlS	ABD30512.1	CP000253.1	major facilitator superfamily (MFS) antibiotic efflux pump	disinfecting agents and antiseptics;fluoroquinolone antibiotic	antibiotic efflux	OD2	Lumen	DescendingColon	"ArlS is a protein histidine kinase that phosphorylates ArlR, a promoter for norA expression."
ODIWGS60	ARO:3002556	18	AAC(6')-Ii	AAB63533.1	L12710.1	AAC(6')	aminoglycoside antibiotic	antibiotic inactivation	OD2	Lumen	DescendingColon	"AAC(6')-Ii is a chromosomal-encoded aminoglycoside acetyltransferase in Enterococcus spp."
ODIWGS60	ARO:3002628	28	aad(6)	AAU10334.1	AY712687.1	ANT(6)	aminoglycoside antibiotic	antibiotic inactivation	OD2	Lumen	DescendingColon	"ANT(6)-Ia/aad(6) is a plasmid-encoded aminoglycoside nucleotidyltransferase gene in E. faecalis and Streptococcus oralis."
ODIWGS60	ARO:3000190	1131	tet(O)	AAA23033.2	M18896.2	tetracycline-resistant ribosomal protection protein	tetracycline antibiotic	antibiotic target protection	OD2	Lumen	DescendingColon	"Tet(O) is a ribosomal protection protein. It is associated with conjugative plasmids."
ODIWGS60	ARO:3000319	332	mphC	BAA34540.1	AB013298.1	macrolide phosphotransferase (MPH)	macrolide antibiotic	antibiotic inactivation	OD2	Lumen	DescendingColon	"The mphC gene was identified from Staphylococcus aureus. This gene shows similarity to mphB gene from Escherchia coli."
ODIWGS60	ARO:3004667	17	Saur_norA	BAA14147.1	D90119.1	major facilitator superfamily (MFS) antibiotic efflux pump	fluoroquinolone antibiotic	antibiotic efflux	OD2	Lumen	DescendingColon	"NorA gene cloned from Staphylococcus aureus conferred relatively high resistance to hydrophilic quinolones such as norfloxacin, enoxacin, ofloxacin, and ciprofloxacin in S. aureus and Escherichia coli. Had low or no resistance at all to hydrophobic ones such as nalidixic acid, oxolinic acid, and sparfloxacin in S. aureus and Escherichia coli."
ODIWGS60	ARO:3002647	1222	APH(3')-IIIa	AGV10830.1	CP004067.1	APH(3')	aminoglycoside antibiotic	antibiotic inactivation	OD2	Lumen	DescendingColon	"APH(3')-IIIa is a plasmid-encoded aminoglycoside phosphotransferase in S. aureus and Enterococcus spp."
ODIWGS60	ARO:3002919	2811	vanR_in_vanA_cl	AAA65953.1	M97297.1	glycopeptide resistance gene cluster;vanR	glycopeptide antibiotic	antibiotic target alteration	OD2	Lumen	DescendingColon	"Also known as vanRA, is a vanR variant found in the vanA gene cluster."
ODIWGS60	ARO:3000026	1201	mepA	AAU95768.1	AY661734.1	multidrug and toxic compound extrusion (MATE) transporter	glycylcycline;tetracycline antibiotic	antibiotic efflux	OD2	Lumen	DescendingColon	"MepA is an efflux protein regulated by MepR and part of the MepRAB cluster. Its presence in Staphylococcus aureus led to multidrug resistance, while it has also been shown to decrease tigecycline susceptibility."
ODIWGS60	ARO:3007010	771	norC	AGP27106.1	CP005288.1	major facilitator superfamily (MFS) antibiotic efflux pump	disinfecting agents and antiseptics;fluoroquinolone antibiotic	antibiotic efflux	OD2	Lumen	DescendingColon	"NorC is a multidrug efflux pump in Staphylococcus aureus that confers resistance to fluoroquinolones and other structurally unrelated antibiotics like tetracycline. It shares 61% similarity with NorB, and is a structural homolog of Blt of Bacillus subtilis. Like NorA and NorB, NorC is regulated by mgrA, also known as NorR."
ODIWGS60	ARO:3007119	343	tet(O/32/O)	CAC41371.2	AJ295238.3	tetracycline-resistant ribosomal protection protein	tetracycline antibiotic	antibiotic target protection	OD2	Lumen	DescendingColon	"Tet(O/32/O) is a mosaic tetracycline resistance gene and ribosomal protection protein."
ODIWGS60	ARO:3000375	50	ErmB	AAF86219.1	AF242872.1	Erm 23S ribosomal RNA methyltransferase	lincosamide antibiotic;macrolide antibiotic;streptogramin A antibiotic;streptogramin B antibiotic;streptogramin antibiotic	antibiotic target alteration	OD2	Lumen	DescendingColon	"ErmB confers the MLSb phenotype. Similar to ErmC, expression of ErmB is inducible by erythromycin. The leader peptide causes attenuation of the mRNA and stabilizes the structure preventing further translation. When erythromycin is present, it binds the leader peptide causing a change in conformation allowing for the expression of ErmB."
ODIWGS60	ARO:3007013	508	sdrM	BAB43261.1	BA000018.3	major facilitator superfamily (MFS) antibiotic efflux pump	disinfecting agents and antiseptics;fluoroquinolone antibiotic	antibiotic efflux	OD2	Lumen	DescendingColon	"sdrM encodes an efflux pump that confers resistance to norfloxacin and ethidium bromide, making this a multidrug resistance gene."
ODIWGS60	ARO:3002942	464	vanH_in_vanA_cl	AAA65955.1	M97297.1	glycopeptide resistance gene cluster;vanH	glycopeptide antibiotic	antibiotic target alteration	OD2	Lumen	DescendingColon	"Also known as vanHA, is a vanH variant in the vanA gene cluster."
ODIWGS62	ARO:3000186	52	tet(M)	BAB82500.1	AB039845.1	tetracycline-resistant ribosomal protection protein	tetracycline antibiotic	antibiotic target protection	OD9	Mucosa	Duodenum	"Tet(M) is a ribosomal protection protein that confers tetracycline resistance. It is found on transposable DNA elements and its horizontal transfer between bacterial species has been documented."
ODIWGS62	ARO:3005047	35	eptB	CCI79240.1	FO203501.1	pmr phosphoethanolamine transferase	peptide antibiotic	antibiotic target alteration	OD9	Mucosa	Duodenum	"eptB is a phosphoethanolamine transferase. It confers resistance to peptide antibiotics."
ODIWGS62	ARO:3002931	149	vanS_in_vanA_cl	AAA65954.1	M97297.1	glycopeptide resistance gene cluster;vanS	glycopeptide antibiotic	antibiotic target alteration	OD9	Mucosa	Duodenum	"Also known as vanSA, is a vanS variant found in the vanA gene cluster."
ODIWGS62	ARO:3002949	14	vanX_in_vanA_cl	AAA65957.1	M97297.1	glycopeptide resistance gene cluster;vanX	glycopeptide antibiotic	antibiotic target alteration	OD9	Mucosa	Duodenum	"Also known as vanXA, is a vanX variant found in the vanA gene cluster."
ODIWGS62	ARO:3000815	35	mgrA	BAB41874.1	BA000018.3	ATP-binding cassette (ABC) antibiotic efflux pump;major facilitator superfamily (MFS) antibiotic efflux pump	cephalosporin;disinfecting agents and antiseptics;fluoroquinolone antibiotic;penam;peptide antibiotic;tetracycline antibiotic	antibiotic efflux	OD9	Mucosa	Duodenum	"MgrA, also known as NorR, is a regulator for norA, norB, and tet38. It is a positive regulator for norA expression, but is a direct repressor for norB and an indirect repressor of tet38."
ODIWGS62	ARO:3004442	28	tet(W/N/W)	AMP42147.1	KU736867.1	tetracycline-resistant ribosomal protection protein	tetracycline antibiotic	antibiotic target protection	OD9	Mucosa	Duodenum	"tet(W/N/W) is a mosaic tetracycline resistance gene and ribosomal protection protein."
ODIWGS62	ARO:3003954	27	efmA	BAG75524.1	AB467372.1	major facilitator superfamily (MFS) antibiotic efflux pump	fluoroquinolone antibiotic;macrolide antibiotic	antibiotic efflux	OD9	Mucosa	Duodenum	"efmA is an MFS transporter permease in E. faecium."
ODIWGS62	ARO:3000194	82	tet(W)	CAA10975.1	AJ222769.3	tetracycline-resistant ribosomal protection protein	tetracycline antibiotic	antibiotic target protection	OD9	Mucosa	Duodenum	"Tet(W) is a ribosomal protection protein. It is associated with both conjugative and non conjugative DNA and has been found strains of Clostridioides difficile."
ODIWGS62	ARO:3003982	266	LlmA_23S_CLI	APB03216.1	KX531046.1	Llm 23S ribosomal RNA methyltransferase	lincosamide antibiotic	antibiotic target alteration	OD9	Mucosa	Duodenum	"Lincosamide (Clindamycin) resistant (putative) ribosomal methyltransferase related to the RlmK 23S rRNA methyltransferase COG family. Detected in Paenibacillus sp. LC231, an isolated strain of Paenibacillus found in Lechuguilla Cave, NM, USA. Described by Pawlowski et al. 2016."
ODIWGS62	ARO:3000565	51	tet(38)	AAV80464.1	AY825285.1	major facilitator superfamily (MFS) antibiotic efflux pump	tetracycline antibiotic	antibiotic efflux	OD9	Mucosa	Duodenum	"Tet38 is a tetracycline efflux pump found in the Gram-positive Staphylococcus aureus. It is regulated by mgrA, which also regulates NorB."
ODIWGS62	ARO:3004659	21	Mef(En2)	AAF74725.1	AF251288.1	major facilitator superfamily (MFS) antibiotic efflux pump	macrolide antibiotic	antibiotic efflux	OD9	Mucosa	Duodenum	"NBU2-encoded resistance gene. An MefE homolog in Bacteroides species. Macrolide efflux MFS transporter."
ODIWGS62	ARO:3000412	15	sul2	AAL59753.1	AY055428.1	sulfonamide resistant sul	sulfonamide antibiotic;sulfone antibiotic	antibiotic target replacement	OD9	Mucosa	Duodenum	"Sul2 is a sulfonamide resistant dihydropteroate synthase of Gram-negative bacteria, usually found on small plasmids."
ODIWGS62	ARO:3005044	15	OmpA	CDO13836.1	FO834906.1	General Bacterial Porin with reduced permeability to peptide antibiotics	peptide antibiotic	reduced permeability to antibiotic	OD9	Mucosa	Duodenum	"OmpA is a porin that confers resistance to beta-lactam antibiotics."
ODIWGS62	ARO:3002867	22	dfrF	AAD01868.1	AF028812.1	trimethoprim resistant dihydrofolate reductase dfr	diaminopyrimidine antibiotic	antibiotic target replacement	OD9	Mucosa	Duodenum	"dfrF is a chromosome-encoded dihydrofolate reductase found in Streptococcus pyogenes."
ODIWGS62	ARO:3000196	150	tet(32)	ACH87088.1	EU722333.1	tetracycline-resistant ribosomal protection protein	tetracycline antibiotic	antibiotic target protection	OD9	Mucosa	Duodenum	"Tet(32) is a tetracycline resistance gene similar to Tet(O), and binds to the ribosome to confer tetracycline resistance as a ribosomal protection protein."
ODIWGS62	ARO:3004572	320	Saur_LmrS	AAW38464.1	CP000046.1	major facilitator superfamily (MFS) antibiotic efflux pump	aminoglycoside antibiotic;diaminopyrimidine antibiotic;macrolide antibiotic;oxazolidinone antibiotic;phenicol antibiotic	antibiotic efflux	OD9	Mucosa	Duodenum	"MFS transporters are secondary active transporters with single-polypeptide chains containing 400-600 amino acids that transport small solutes across the membrane by using electrochemical gradients. LmrS has 14 transmembrane helices and, when expressed in E. coli, is capable of extruding a variety of antibiotics inclinding linezolid, trimethoprim, florfenicol, chlorampheniocol, erythromycin, stre…
ODIWGS62	ARO:3002955	11	vanY_in_vanA_cl	AAA65958.1	M97297.1	glycopeptide resistance gene cluster;vanY	glycopeptide antibiotic	antibiotic target alteration	OD9	Mucosa	Duodenum	"Also known as vanYA, is a vanY variant found in the vanA gene cluster."
ODIWGS62	ARO:3002897	14	SAT-4	AAB53445.1	U01945.1	streptothricin acetyltransferase (SAT)	nucleoside antibiotic	antibiotic inactivation	OD9	Mucosa	Duodenum	"SAT-4 is a plasmid-mediated streptothricin acetyltransferase and streptothricin (a nucleoside antibiotic) resistant determinant. Originally described from a Campylobacter coli BE/G4 plasmid gene sequence by Jacob et al, 1994."
ODIWGS62	ARO:3007122	17	tet(O/W/32/O)	ABF69686.1	DQ525023.1	tetracycline-resistant ribosomal protection protein	tetracycline antibiotic	antibiotic target protection	OD9	Mucosa	Duodenum	"Tet(O/W/32/O) is a mosaic tetracycline resistance gene and ribosomal protection protein."
ODIWGS62	ARO:3004047	317	kdpD	CYF42523.1	FHDU01000010.1	kdpDE	aminoglycoside antibiotic	antibiotic efflux	OD9	Mucosa	Duodenum	"kdpD is a component of the two-component regulatory system, kdpDE. This system is involved in potassium transport and homeostasis, and has been implicated in virulence factor regulation along with kdpE."
ODIWGS62	ARO:3005166	56	tet(X1)	CAC47933.1	AJ311171.1	tetracycline inactivation enzyme	tetracycline antibiotic	antibiotic inactivation	OD9	Mucosa	Duodenum	"Tetracycline resistance gene tet(X) ortholog described by Fang et al. 2020."
ODIWGS62	ARO:3000746	14	mepR	BAB56495.1	BA000017.4	multidrug and toxic compound extrusion (MATE) transporter	glycylcycline;tetracycline antibiotic	antibiotic efflux	OD9	Mucosa	Duodenum	"MepR is an upstream repressor of MepA in Staphylococcus aureus. It is part of the mepRAB operon."
ODIWGS62	ARO:3000251	159	msrA	CAA36304.1	X52085.1	msr-type ABC-F protein	macrolide antibiotic;streptogramin B antibiotic;streptogramin antibiotic	antibiotic target protection	OD9	Mucosa	Duodenum	"MsrA is an ABC-F subfamily ribosomal protection protein expressed in Staphylococcus species which confers resistance to erythromycin and streptogramin B antibiotics through antibiotic target protection mechanisms. It is associated with plasmid DNA."
ODIWGS62	ARO:3000839	339	arlS	ABD30512.1	CP000253.1	major facilitator superfamily (MFS) antibiotic efflux pump	disinfecting agents and antiseptics;fluoroquinolone antibiotic	antibiotic efflux	OD9	Mucosa	Duodenum	"ArlS is a protein histidine kinase that phosphorylates ArlR, a promoter for norA expression."
ODIWGS62	ARO:3000190	138	tet(O)	AAA23033.2	M18896.2	tetracycline-resistant ribosomal protection protein	tetracycline antibiotic	antibiotic target protection	OD9	Mucosa	Duodenum	"Tet(O) is a ribosomal protection protein. It is associated with conjugative plasmids."
ODIWGS62	ARO:3005053	42	ArnT	CDO12042.1	FO834906.1	pmr phosphoethanolamine transferase	peptide antibiotic	antibiotic target alteration	OD9	Mucosa	Duodenum	"ArnT is involved in Cell Wall Biosynthesis, specifically 4-amino-4-deoxy-L-arabinose (Ara4N). It confers resistance to peptide antibiotics."
ODIWGS62	ARO:3000319	13	mphC	BAA34540.1	AB013298.1	macrolide phosphotransferase (MPH)	macrolide antibiotic	antibiotic inactivation	OD9	Mucosa	Duodenum	"The mphC gene was identified from Staphylococcus aureus. This gene shows similarity to mphB gene from Escherchia coli."
ODIWGS62	ARO:3002647	86	APH(3')-IIIa	AGV10830.1	CP004067.1	APH(3')	aminoglycoside antibiotic	antibiotic inactivation	OD9	Mucosa	Duodenum	"APH(3')-IIIa is a plasmid-encoded aminoglycoside phosphotransferase in S. aureus and Enterococcus spp."
ODIWGS62	ARO:3002919	400	vanR_in_vanA_cl	AAA65953.1	M97297.1	glycopeptide resistance gene cluster;vanR	glycopeptide antibiotic	antibiotic target alteration	OD9	Mucosa	Duodenum	"Also known as vanRA, is a vanR variant found in the vanA gene cluster."
ODIWGS62	ARO:3000026	96	mepA	AAU95768.1	AY661734.1	multidrug and toxic compound extrusion (MATE) transporter	glycylcycline;tetracycline antibiotic	antibiotic efflux	OD9	Mucosa	Duodenum	"MepA is an efflux protein regulated by MepR and part of the MepRAB cluster. Its presence in Staphylococcus aureus led to multidrug resistance, while it has also been shown to decrease tigecycline susceptibility."
ODIWGS62	ARO:3007013	79	sdrM	BAB43261.1	BA000018.3	major facilitator superfamily (MFS) antibiotic efflux pump	disinfecting agents and antiseptics;fluoroquinolone antibiotic	antibiotic efflux	OD9	Mucosa	Duodenum	"sdrM encodes an efflux pump that confers resistance to norfloxacin and ethidium bromide, making this a multidrug resistance gene."
ODIWGS62	ARO:3002942	56	vanH_in_vanA_cl	AAA65955.1	M97297.1	glycopeptide resistance gene cluster;vanH	glycopeptide antibiotic	antibiotic target alteration	OD9	Mucosa	Duodenum	"Also known as vanHA, is a vanH variant in the vanA gene cluster."
ODIWGS63	ARO:3003905	33	ANT(4')-Ib	ADA62098.1	GQ900432.1	ANT(4')	aminoglycoside antibiotic	antibiotic inactivation	OD1	Lumen	Jejunum	"Aminoglycoside nucleotidyltransferase sequence from Staphylococcus aureus plasmid."
ODIWGS65	ARO:3004254	39	vanV_in_vanB_cl	AAO82019.1	AE016830.1	glycopeptide resistance gene cluster;vanV	glycopeptide antibiotic	antibiotic target alteration	OD9	Mucosa	Ileum	"Also known as vanVB, is a vanV variant found in the vanB gene cluster. It is found in some but not all vanB operons in E. faecalis, suggesting the existence of varied gene compositions in vanB operons."
ODIWGS65	ARO:3000830	118	cpxA	BAB38260.1	BA000007.3	resistance-nodulation-cell division (RND) antibiotic efflux pump	aminocoumarin antibiotic;aminoglycoside antibiotic	antibiotic efflux	OD9	Mucosa	Ileum	"CpxA is a membrane-localized sensor kinase that is activated by envelope stress. It starts a kinase cascade that activates CpxR, which promotes efflux complex expression."
ODIWGS65	ARO:3007120	11	tet(O/M/O)	AAR29485.1	AY394560.1	tetracycline-resistant ribosomal protection protein	tetracycline antibiotic	antibiotic target protection	OD9	Mucosa	Ileum	"Tet(O/M/O) is a mosaic tetracycline resistance gene and ribosomal protection protein."
ODIWGS65	ARO:3000194	518	tet(W)	CAA10975.1	AJ222769.3	tetracycline-resistant ribosomal protection protein	tetracycline antibiotic	antibiotic target protection	OD9	Mucosa	Ileum	"Tet(W) is a ribosomal protection protein. It is associated with both conjugative and non conjugative DNA and has been found strains of Clostridioides difficile."
ODIWGS65	ARO:3002871	444	tet(37)	AAN28721.1	AF540889.1	tetracycline inactivation enzyme	tetracycline antibiotic	antibiotic inactivation	OD9	Mucosa	Ileum	"tet(37) is a chromosome-encoded oxidoreductase isolated from an uncultured bacterium that confers resistance to tetracycline."
ODIWGS65	ARO:3002837	82	lnuC	AAY32951.1	AY928180.1	lincosamide nucleotidyltransferase (LNU)	lincosamide antibiotic	antibiotic inactivation	OD9	Mucosa	Ileum	"lnuC is a transposon-mediated nucleotidyltransferase found in Streptococcus agalactiae."
ODIWGS65	ARO:3002867	128	dfrF	AAD01868.1	AF028812.1	trimethoprim resistant dihydrofolate reductase dfr	diaminopyrimidine antibiotic	antibiotic target replacement	OD9	Mucosa	Ileum	"dfrF is a chromosome-encoded dihydrofolate reductase found in Streptococcus pyogenes."
ODIWGS65	ARO:3007121	168	tet(O/W)	AAR29969.1	AY485122.1	tetracycline-resistant ribosomal protection protein	tetracycline antibiotic	antibiotic target protection	OD9	Mucosa	Ileum	"Tet(O/W) is a mosaic tetracycline resistance gene and ribosomal protection protein."
ODIWGS65	ARO:3007041	116	Erm(52)	QQM99828.1	MW269959.1	Erm 23S ribosomal RNA methyltransferase	lincosamide antibiotic;macrolide antibiotic;streptogramin antibiotic	antibiotic target alteration	OD9	Mucosa	Ileum	"Erm(52) is an Erm ribosomal RNA methyltransferase."
ODIWGS65	ARO:3000196	912	tet(32)	ACH87088.1	EU722333.1	tetracycline-resistant ribosomal protection protein	tetracycline antibiotic	antibiotic target protection	OD9	Mucosa	Ileum	"Tet(32) is a tetracycline resistance gene similar to Tet(O), and binds to the ribosome to confer tetracycline resistance as a ribosomal protection protein."
ODIWGS65	ARO:3000567	49	tet(40)	CAM12479.1	AM419751.1	major facilitator superfamily (MFS) antibiotic efflux pump	tetracycline antibiotic	antibiotic efflux	OD9	Mucosa	Ileum	"Tet40 is a tetracycline efflux pump found in the Gram-positive Clostridium. It is similar to tetA(P)."
ODIWGS65	ARO:3000832	1821	evgA	BAB36671.1	BA000007.3	major facilitator superfamily (MFS) antibiotic efflux pump;resistance-nodulation-cell division (RND) antibiotic efflux pump	fluoroquinolone antibiotic;macrolide antibiotic;penam;tetracycline antibiotic	antibiotic efflux	OD9	Mucosa	Ileum	"EvgA, when phosphorylated, is a positive regulator for efflux protein complexes emrKY and mdtEF. While usually phosphorylated in a EvgS dependent manner, it can be phosphorylated in the absence of EvgS when overexpressed."
ODIWGS65	ARO:3004253	202	vanU_in_vanG_cl	ABA71726.1	DQ212986.1	glycopeptide resistance gene cluster;vanU	glycopeptide antibiotic	antibiotic target alteration	OD9	Mucosa	Ileum	"Also known as vanUG, is a vanG variant found in the vanG gene cluster."
ODIWGS65	ARO:3000833	2022	evgS	AAC75429.1	U00096.1	major facilitator superfamily (MFS) antibiotic efflux pump;resistance-nodulation-cell division (RND) antibiotic efflux pump	fluoroquinolone antibiotic;macrolide antibiotic;penam;tetracycline antibiotic	antibiotic efflux	OD9	Mucosa	Ileum	"EvgS is a sensor protein that phosphorylates the regulatory protein EvgA. evgS corresponds to 1 locus in Pseudomonas aeruginosa PAO1 and 1 locus in Pseudomonas aeruginosa LESB58."
ODIWGS65	ARO:3003578	224	PmrF	AAC75314.1	U00096.1	pmr phosphoethanolamine transferase	peptide antibiotic	antibiotic target alteration	OD9	Mucosa	Ileum	"PmrF is required for the synthesis and transfer of 4-amino-4-deoxy-L-arabinose (Ara4N) to Lipid A, which allows gram-negative bacteria to resist the antimicrobial activity of cationic antimicrobial peptides and antibiotics such as polymyxin. pmrF corresponds to 1 locus in Pseudomonas aeruginosa PAO1 and 1 locus in Pseudomonas aeruginosa LESB58."
ODIWGS65	ARO:3007122	49	tet(O/W/32/O)	ABF69686.1	DQ525023.1	tetracycline-resistant ribosomal protection protein	tetracycline antibiotic	antibiotic target protection	OD9	Mucosa	Ileum	"Tet(O/W/32/O) is a mosaic tetracycline resistance gene and ribosomal protection protein."
ODIWGS65	ARO:3002986	1445	bacA	AAC76093.1	U00096.3	undecaprenyl pyrophosphate related proteins	peptide antibiotic	antibiotic target alteration	OD9	Mucosa	Ileum	"The bacA gene product (BacA) recycles undecaprenyl pyrophosphate during cell wall biosynthesis which confers resistance to bacitracin."
ODIWGS65	ARO:3000216	51	acrB	AAC73564.1	U00096.3	resistance-nodulation-cell division (RND) antibiotic efflux pump	cephalosporin;disinfecting agents and antiseptics;fluoroquinolone antibiotic;glycylcycline;penam;phenicol antibiotic;rifamycin antibiotic;tetracycline antibiotic	antibiotic efflux	OD9	Mucosa	Ileum	"Protein subunit of AcrA-AcrB-TolC multidrug efflux complex. AcrB functions as a herterotrimer which forms the inner membrane component and is primarily responsible for substrate recognition and energy transduction by acting as a drug/proton antiporter."
ODIWGS65	ARO:3000190	489	tet(O)	AAA23033.2	M18896.2	tetracycline-resistant ribosomal protection protein	tetracycline antibiotic	antibiotic target protection	OD9	Mucosa	Ileum	"Tet(O) is a ribosomal protection protein. It is associated with conjugative plasmids."
ODIWGS65	ARO:3000245	12	RbpA	ADV91011.1	HQ203032.1	RbpA bacterial RNA polymerase-binding protein	rifamycin antibiotic	antibiotic target protection	OD9	Mucosa	Ileum	"RNA-polymerase binding protein which confers resistance to rifampin."
ODIWGS65	ARO:3007119	261	tet(O/32/O)	CAC41371.2	AJ295238.3	tetracycline-resistant ribosomal protection protein	tetracycline antibiotic	antibiotic target protection	OD9	Mucosa	Ileum	"Tet(O/32/O) is a mosaic tetracycline resistance gene and ribosomal protection protein."
ODIWGS65	ARO:3000316	16	mphA	BAA03776.1	D16251.1	macrolide phosphotransferase (MPH)	macrolide antibiotic	antibiotic inactivation	OD9	Mucosa	Ileum	"The mphA gene encodes for resistance enzyme MPH(2')-I which preferentially inactivate 14-membered macrolides (e.g.erythromycin, telithromycin, roxithromycin) over 16-membered macrolides (e.g.tylosin, spiramycin). It phosphorylates macrolides at 2'-OH hydroxyl of desosamine sugar of macrolides in a GTP-dependent manner."
ODIWGS65	ARO:3003839	45	Mrx	AAS13767.1	AY522923.1	macrolide phosphotransferase (MPH)	macrolide antibiotic	antibiotic inactivation	OD9	Mucosa	Ileum	"Mrx is part of the macrolide inactivation gene cluster in Aeromonas hydrophila."
ODIWGS65	ARO:3005040	16	YajC	TKW44661.1	VAOQ01003483.1	resistance-nodulation-cell division (RND) antibiotic efflux pump	cephalosporin;disinfecting agents and antiseptics;fluoroquinolone antibiotic;glycopeptide antibiotic;glycylcycline;oxazolidinone antibiotic;penam;phenicol antibiotic;rifamycin antibiotic;tetracycline antibiotic	antibiotic efflux	OD9	Mucosa	Ileum	"YajC interacts with the AcrAB-TolC efflux pump in a way that in uncharacterized but is shown to grant increased fitness in the presence of linezolid, rifampicin, and vancomycin."
ODIWGS66	ARO:3003982	76	LlmA_23S_CLI	APB03216.1	KX531046.1	Llm 23S ribosomal RNA methyltransferase	lincosamide antibiotic	antibiotic target alteration	OD3	Mucosa	Jejunum	"Lincosamide (Clindamycin) resistant (putative) ribosomal methyltransferase related to the RlmK 23S rRNA methyltransferase COG family. Detected in Paenibacillus sp. LC231, an isolated strain of Paenibacillus found in Lechuguilla Cave, NM, USA. Described by Pawlowski et al. 2016."
ODIWGS67	ARO:3003923	26	oqxB	AAP43110.2	EU370913.1	resistance-nodulation-cell division (RND) antibiotic efflux pump	diaminopyrimidine antibiotic;fluoroquinolone antibiotic;glycylcycline;nitrofuran antibiotic;tetracycline antibiotic	antibiotic efflux	OD2	Mucosa	TransverseColon	"RND efflux pump conferring resistance to fluoroquinolone."
ODIWGS67	ARO:3000237	15	TolC	ACN32294.1	FJ768952.1	ATP-binding cassette (ABC) antibiotic efflux pump;major facilitator superfamily (MFS) antibiotic efflux pump;resistance-nodulation-cell division (RND) antibiotic efflux pump	aminocoumarin antibiotic;aminoglycoside antibiotic;carbapenem;cephalosporin;cephamycin;disinfecting agents and antiseptics;fluoroquinolone antibiotic;glycylcycline;macrolide antibiotic;penam;penem;peptide antibiotic;phenicol antibiotic;rifamycin antibiotic;tetracycline antibiotic	antibiotic efflux	OD2	Mucosa	TransverseColon	"TolC is a protein subunit of many multidrug efflux complexes in Gram negative bacteria. It is an outer membrane efflux protein and is constitutively open. Regulation of efflux activity is often at its periplasmic entrance by other components of the efflux complex."
[truncated: 407 more rows]
